# Supplementary material for: Recurrent Translocations in Topoisomerase Inhibitor-Related Leukemia Are Determined by the Features of DNA Breaks Rather Than by the Proximity of the Translocating Genes
Source: MDPI journal article supplement (doi:10.3390/ijms23179824), 2022-08-29
Supplement: s1 [file s1]

|                |                   | non-treated   |               | etoposide-treated |               | non-treated    |                |
|----------------|-------------------|---------------|---------------|-------------------|---------------|----------------|----------------|
|                |                   | <i>AML1_1</i> | <i>AML1_2</i> | <i>AML1_1</i>     | <i>AML1_2</i> | <i>CCND1_1</i> | <i>CCND1_2</i> |
| <i>AML1_1</i>  | non-treated       | 1             | 0,9999        | 0,9999            | 0,9999        | 0,0001         | -0,0006        |
| <i>AML1_2</i>  | non-treated       | 0,9999        | 1             | 1,0000            | 1,0000        | 0,0001         | -0,0006        |
| <i>AML1_1</i>  | etoposide-treated | 0,9999        | 1,0000        | 1                 | 1,0000        | 0,0001         | -0,0005        |
| <i>AML1_2</i>  | etoposide-treated | 0,9999        | 1,0000        | 1,0000            | 1             | 0,0001         | -0,0006        |
| <i>CCND1_1</i> | non-treated       | 0,0001        | 0,0001        | 0,0001            | 0,0001        | 1              | 0,9987         |
| <i>CCND1_2</i> | non-treated       | -0,0006       | -0,0006       | -0,0005           | -0,0006       | 0,9987         | 1              |
| <i>CCND1_1</i> | etoposide-treated | -0,0003       | -0,0003       | -0,0002           | -0,0003       | 0,9986         | 0,9984         |
| <i>CCND1_2</i> | etoposide-treated | -0,0005       | -0,0005       | -0,0005           | -0,0005       | 0,9982         | 0,9968         |
| <i>MLL_1</i>   | non-treated       | -0,0001       | -0,0001       | 0,0000            | -0,0001       | 0,0030         | 0,0074         |
| <i>MLL_2</i>   | non-treated       | 0,0005        | 0,0005        | 0,0006            | 0,0005        | 0,0034         | 0,0077         |
| <i>MLL_1</i>   | etoposide-treated | -0,0001       | -0,0001       | -0,0001           | -0,0001       | 0,0031         | 0,0075         |
| <i>MLL_2</i>   | etoposide-treated | 0,0004        | 0,0004        | 0,0004            | 0,0004        | 0,0038         | 0,0080         |

| etoposide-treated |                | non-treated  |              | etoposide-treated |              |
|-------------------|----------------|--------------|--------------|-------------------|--------------|
| <i>CCND1_1</i>    | <i>CCND1_2</i> | <i>MLL_1</i> | <i>MLL_2</i> | <i>MLL_1</i>      | <i>MLL_2</i> |
| -0,0003           | -0,0005        | -0,0001      | 0,0005       | -0,0001           | 0,0004       |
| -0,0003           | -0,0005        | -0,0001      | 0,0005       | -0,0001           | 0,0004       |
| -0,0002           | -0,0005        | 0,0000       | 0,0006       | -0,0001           | 0,0004       |
| -0,0003           | -0,0005        | -0,0001      | 0,0005       | -0,0001           | 0,0004       |
| 0,9986            | 0,9982         | 0,0030       | 0,0034       | 0,0031            | 0,0038       |
| 0,9984            | 0,9968         | 0,0074       | 0,0077       | 0,0075            | 0,0080       |
| 1                 | 0,9973         | 0,0038       | 0,0042       | 0,0040            | 0,0045       |
| 0,9973            | 1              | 0,0034       | 0,0038       | 0,0036            | 0,0042       |
| 0,0038            | 0,0034         | 1            | 0,9996       | 0,9993            | 0,9993       |
| 0,0042            | 0,0038         | 0,9996       | 1            | 0,9996            | 0,9991       |
| 0,0040            | 0,0036         | 0,9993       | 0,9996       | 1                 | 0,9987       |
| 0,0045            | 0,0042         | 0,9993       | 0,9991       | 0,9987            | 1            |
