# Supplementary material for: Recurrent Translocations in Topoisomerase Inhibitor-Related Leukemia Are Determined by the Features of DNA Breaks Rather Than by the Proximity of the Translocating Genes
Source: Int J Mol Sci. 2022 Aug 29;23(17):9824. doi: 10.3390/ijms23179824 (PMC9456246; doi:10.3390/ijms23179824)
Supplement: Supplementary file 1 [file ijms-23-09824-s001.zip]

Archive with 7 entries (7 files):
- Figure S1. 4C-seq workflow and localization of the 4C-seq primers and FISH probes.pdf
- Figure S2. Correlation plot for replicates of 4C-seq experiments.pdf
- Table S1. All 3D-FISH signal parameters.xlsx
- Table S2. FISH AML1 localization statistic.xlsx
- Table S3. 4C-seq data.xlsx
- Table S4. Partners VS other human genes. 4C-seq.xlsx
- Table S5. 4C_mapping_stat.xlsx
