# Supplementary material for: Recurrent Translocations in Topoisomerase Inhibitor-Related Leukemia Are Determined by the Features of DNA Breaks Rather Than by the Proximity of the Translocating Genes
Source: Int J Mol Sci. 2022 Aug 29;23(17):9824. doi: 10.3390/ijms23179824 (PMC9456246; doi:10.3390/ijms23179824)
Supplement: Supplementary file 1 [file ijms-23-09824-s001.zip › Table S1. All 3D-FISH signal parameters.xlsx]

## Sheet: EXP sum
Signal number	physical_distance	ellipsoid_distance	distance_to_surface
Etoposide_AML_180min_r2_10_42_128	1816.05	428.46	15
Etoposide_AML_180min_r2_10_42_89	1816.05	0	-247.17
Etoposide_AML_180min_2_71_168	1772.52	428.46	200.68
Etoposide_AML_180min_2_71_138	1772.52	0	-1
Etoposide_AML_90min_r2_4_2_9	1762.12	285.64	220.45
Etoposide_AML_90min_r2_4_2_5	1762.12	0	-276.46
Etoposide_AML_0min_4_74_186	1748.52	0	-358.82
Etoposide_AML_0min_4_74_163	1748.52	0	-387.01
Etoposide_AML_90min_r2_2_28_74	1748.04	-142.82	-115.53
Etoposide_AML_90min_r2_2_28_88	1748.04	-142.82	-344.85
Etoposide_AML_180min_2_23_48	1732.7	-428.46	-1
Etoposide_AML_180min_2_23_51	1732.7	-142.82	-308.74
Etoposide_AML_180min_r2_10_62_183	1717.62	0	-137.94
Etoposide_AML_180min_r2_10_62_130	1717.62	-142.82	-219.83
Etoposide_AML_0min_6_76_192	1689.17	0	-1
Etoposide_AML_0min_6_76_156	1689.17	-142.82	-1
Etoposide_AML_180min_5_65_167	1686.48	0	-1
Etoposide_AML_180min_5_65_142	1686.48	-428.46	-58.69
Etoposide_AML_90min_r2_3_83_213	1673.7	-142.82	-15.54
Etoposide_AML_90min_r2_3_83_189	1673.7	-142.82	-19.31
Etoposide_AML_90min_r2_9_94_208	1643.42	0	-212.37
Etoposide_AML_90min_r2_9_94_211	1643.42	0	-293.92
Etoposide_AML_180min_r2_09_69_137	1629.1	-142.82	-164.72
Etoposide_AML_180min_r2_09_69_173	1629.1	0	-202.66
Etoposide_AML_180min_6_54_112	1612.25	0	-1
Etoposide_AML_180min_6_54_155	1612.25	-142.82	-216.76
Etoposide_AML_90min_r2_5_82_186	1580.27	0	1
Etoposide_AML_90min_r2_5_82_165	1580.27	0	-309.32
Etoposide_AML_180min_5_77_165	1525.39	-142.82	-147.11
Etoposide_AML_180min_5_77_201	1525.39	-142.82	-248.93
Etoposide_AML_90min_r2_8_38_87	1507.18	0	-133.77
Etoposide_AML_90min_r2_8_38_86	1507.18	-142.82	-155.3
Etoposide_AML_180min_6_17_52	1471.3	0	252.03
Etoposide_AML_180min_6_17_35	1471.3	-142.82	-263.77
Etoposide_AML_0min_7_94_197	1420.26	0	-1
Etoposide_AML_0min_7_94_248	1420.26	0	-186.34
Etoposide_AML_90min_r2_6_64_145	1418.31	428.46	-1
Etoposide_AML_90min_r2_6_64_131	1418.31	0	-306.09
Etoposide_AML_180min_1_42_69	1395.78	-142.82	-201.25
Etoposide_AML_180min_1_42_94	1395.78	-142.82	-312.44
Etoposide_AML_180min_r2_04_62_135	1373.23	0	-208.3
Etoposide_AML_180min_r2_11_62_135	1373.23	0	-208.3
Etoposide_AML_180min_r2_11_62_167	1373.23	0	-234.07
Etoposide_AML_180min_r2_04_62_167	1373.23	0	-234.07
Etoposide_AML_90min_r2_2_87_205	1362.5	-142.82	-1.43
Etoposide_AML_90min_r2_2_87_247	1362.5	0	-337.1
Etoposide_AML_180min_1_48_108	1345.93	0	-148.94
Etoposide_AML_180min_1_48_79	1345.93	-142.82	-268.59
Etoposide_AML_180min_r2_09_12_28	1315.46	0	-166.99
Etoposide_AML_180min_r2_09_12_31	1315.46	0	-173.74
Etoposide_AML_180min_r2_02_9_20	1300.4	0	-1
Etoposide_AML_180min_r2_02_9_97	1300.4	0	-1
Etoposide_AML_90min_r2_7_74_160	1285.13	0	-61.18
Etoposide_AML_90min_r2_7_74_166	1285.13	-142.82	-80.94
Etoposide_AML_0min_7_43_90	1284.34	0	-242.65
Etoposide_AML_0min_7_43_122	1284.34	0	-358.5
Etoposide_AML_90min_r2_3_57_130	1281.7	-142.82	-32.75
Etoposide_AML_90min_r2_3_57_148	1281.7	0	-163.85
Etoposide_AML_0min_7_80_165	1274.48	-142.82	-140.12
Etoposide_AML_0min_7_80_213	1274.48	0	-314.01
Etoposide_AML_180min_r2_08_42_86	1273.84	0	-280.75
Etoposide_AML_180min_r2_08_42_108	1273.84	0	-287.73
Etoposide_AML_180min_6_91_188	1253.44	-142.82	-199.07
Etoposide_AML_180min_6_91_252	1253.44	-142.82	-285.26
Etoposide_AML_0min_r2_1_26_61	1192.9	0	-9.88
Etoposide_AML_0min_r2_1_26_72	1192.9	0	-377.7
Etoposide_AML_90min_r2_7_42_94	1186.25	0	-34.68
Etoposide_AML_90min_r2_7_42_99	1186.25	-142.82	-303.82
Etoposide_AML_90min_r2_8_48_104	1180.68	0	1
Etoposide_AML_90min_r2_8_48_107	1180.68	-142.82	-281.29
Etoposide_AML_90min_r2_8_65_137	1180.46	0	-1
Etoposide_AML_90min_r2_8_65_141	1180.46	-285.64	-1
Etoposide_AML_180min_6_79_220	1178.58	-142.82	-1
Etoposide_AML_180min_6_79_164	1178.58	0	-186.02
Etoposide_AML_180min_r2_06_53_143	1177.05	-142.82	-1
Etoposide_AML_180min_r2_06_53_105	1177.05	-142.82	-94.53
Etoposide_AML_180min_r2_10_48_143	1166.59	-142.82	-43.5
Etoposide_AML_180min_r2_10_48_102	1166.59	0	-46.24
Etoposide_AML_180min_1_48_107	1150.5	0	-71.17
Etoposide_AML_180min_1_48_78	1150.5	0	-81.23
Etoposide_AML_90min_r2_5_39_77	1140.65	-142.82	-191.23
Etoposide_AML_90min_r2_5_39_90	1140.65	0	-249.74
Etoposide_AML_90min_r2_1_94_195	1120.68	-142.82	-31.81
Etoposide_AML_90min_r2_1_94_236	1120.68	0	-361.5
Etoposide_AML_0min_2_51_167	1114.57	-142.82	-104.47
Etoposide_AML_0min_2_51_100	1114.57	-142.82	-229.29
Etoposide_AML_90min_r2_7_19_48	1111.66	-142.82	-1
Etoposide_AML_90min_r2_7_19_48	1111.66	-142.82	-148.37
Etoposide_AML_0min_7_55_115	1110.53	0	-8.55
Etoposide_AML_0min_7_55_154	1110.53	-142.82	-246.83
Etoposide_AML_90min_r2_4_70_157	1092.18	-142.82	-1
Etoposide_AML_90min_r2_4_70_151	1092.18	-142.82	-1
Etoposide_AML_90min_r2_5_19_45	1091.41	-142.82	-13.17
Etoposide_AML_90min_r2_5_19_40	1091.41	0	-317.51
Etoposide_AML_180min_r2_05_52_105	1083.28	0	-109.18
Etoposide_AML_180min_r2_05_52_138	1083.28	-142.82	-349.79
Etoposide_AML_90min_r2_3_43_99	1079.66	0	-226.46
Etoposide_AML_90min_r2_3_43_111	1079.66	-142.82	-317.39
Etoposide_AML_90min_r2_7_51_116	1071.26	0	-226.35
Etoposide_AML_90min_r2_7_51_119	1071.26	-142.82	-345.8
Etoposide_AML_180min_r2_05_26_49	1052.73	0	-143.95
Etoposide_AML_180min_r2_05_26_65	1052.73	-142.82	-322.3
Etoposide_AML_180min_5_82_213	1049.61	0	-33.97
Etoposide_AML_180min_5_82_174	1049.61	0	-220.08
Etoposide_AML_90min_3_62_138	1046.03	-142.82	-76.21
Etoposide_AML_90min_3_62_154	1046.03	-142.82	-264.04
Etoposide_AML_0min_1_87_194	1044.62	-142.82	-1
Etoposide_AML_0min_1_87_289	1044.62	-142.82	-311.3
Etoposide_AML_90min_r2_8_6_16	1040.37	-142.82	-142.09
Etoposide_AML_90min_r2_8_6_17	1040.37	0	-239.95
Etoposide_AML_90min_r2_5_69_139	1039.66	-142.82	-228.19
Etoposide_AML_90min_r2_5_69_161	1039.66	-142.82	-311.21
Etoposide_AML_180min_r2_07_22_48	1033.55	0	-21.9
Etoposide_AML_180min_r2_07_22_60	1033.55	0	-309.57
Etoposide_AML_90min_r2_5_92_209	1014.55	0	-159.24
Etoposide_AML_90min_r2_5_92_185	1014.55	0	-208.51
Etoposide_AML_180min_6_72_207	1011.37	428.46	414.16
Etoposide_AML_180min_6_72_150	1011.37	0	-1
Etoposide_AML_180min_r2_09_39_81	1007.7	0	-116.5
Etoposide_AML_180min_r2_09_39_105	1007.7	-142.82	-336.04
Etoposide_AML_0min_3_66_135	1001.44	0	-1
Etoposide_AML_0min_3_66_200	1001.44	-142.82	-327.58
Etoposide_AML_90min_r2_1_45_116	1000.84	-142.82	-202.46
Etoposide_AML_90min_r2_1_45_91	1000.84	0	-204.03
Etoposide_AML_180min_r2_05_20_38	987.65	-142.82	-111.19
Etoposide_AML_180min_r2_05_20_48	987.65	0	-129.1
Etoposide_AML_180min_4_32_68	986.12	0	-17
Etoposide_AML_180min_4_32_62	986.12	0	-38.79
Etoposide_AML_0min_7_79_163	985.2	-142.82	-52.05
Etoposide_AML_0min_7_79_210	985.2	-142.82	-212.4
Etoposide_AML_90min_r2_9_93_209	983.3	0	1
Etoposide_AML_90min_r2_9_93_206	983.3	0	-254.42
Etoposide_AML_0min_r2_2_40_82	975.8	0	-277.64
Etoposide_AML_0min_r2_2_40_113	975.8	-142.82	-278.22
Etoposide_AML_180min_r2_07_55_139	968.59	0	-189.18
Etoposide_AML_180min_r2_07_55_115	968.59	0	-231.05
Etoposide_AML_90min_5_73_167	950.59	-428.46	1
Etoposide_AML_90min_5_73_141	950.59	-142.82	-162.49
Etoposide_AML_90min_5_80_157	930.27	0	-221.49
Etoposide_AML_90min_5_80_183	930.27	0	-271.54
Etoposide_AML_90min_r2_7_93_204	921.07	0	-9.32
Etoposide_AML_90min_r2_7_93_195	921.07	-142.82	-225.84
Etoposide_AML_180min_r2_11_58_129	917.61	0	-115.97
Etoposide_AML_180min_r2_04_58_129	917.61	0	-115.97
Etoposide_AML_180min_r2_04_58_159	917.61	0	-237.34
Etoposide_AML_180min_r2_11_58_159	917.61	0	-237.34
Etoposide_AML_90min_r2_9_50_122	910.98	-142.82	-26.97
Etoposide_AML_90min_r2_9_50_122	910.98	-142.82	-281.22
Etoposide_AML_90min_r2_2_87_246	907.98	-142.82	-130.22
Etoposide_AML_90min_r2_2_87_206	907.98	0	-204.92
Etoposide_AML_180min_r2_02_5_12	898.59	0	-1
Etoposide_AML_180min_r2_02_5_13	898.59	-142.82	-1
Etoposide_AML_180min_r2_10_57_122	896.83	0	-253.14
Etoposide_AML_180min_r2_10_57_168	896.83	0	-285.18
Etoposide_AML_180min_7_67_144	883.91	0	-27.23
Etoposide_AML_180min_7_67_213	883.91	-142.82	-116.11
Etoposide_AML_90min_1_69_177	880.07	-142.82	-240.03
Etoposide_AML_90min_1_69_134	880.07	-142.82	-303.43
Etoposide_AML_90min_r2_2_93_218	877.75	0	-1
Etoposide_AML_90min_r2_2_93_261	877.75	0	-103.87
Etoposide_AML_180min_r2_11_59_160	864	0	-142.01
Etoposide_AML_180min_r2_04_59_160	864	0	-142.01
Etoposide_AML_180min_r2_04_59_132	864	0	-167.36
Etoposide_AML_180min_r2_11_59_132	864	0	-167.36
Etoposide_AML_0min_3_59_122	863.99	-142.82	-267.87
Etoposide_AML_0min_3_59_183	863.99	0	-277.97
Etoposide_AML_0min_6_48_105	853.59	-142.82	-35.9
Etoposide_AML_0min_6_48_138	853.59	-142.82	-334.47
Etoposide_AML_0min_r2_6_5_12	851.84	-142.82	-258.12
Etoposide_AML_0min_r2_6_5_17	851.84	0	-340.7
Etoposide_AML_180min_r2_03_43_96	843.13	428.46	-1
Etoposide_AML_180min_r2_03_43_128	843.13	-142.82	-360.76
Etoposide_AML_0min_5_13_24	817.89	-142.82	-97.49
Etoposide_AML_0min_5_13_31	817.89	0	-322.95
Etoposide_AML_180min_r2_08_49_102	815.19	0	-128.36
Etoposide_AML_180min_r2_08_49_126	815.19	-142.82	-185.76
Etoposide_AML_180min_r2_06_36_96	811.61	-142.82	-1
Etoposide_AML_180min_r2_06_36_69	811.61	-142.82	-4.39
Etoposide_AML_180min_r2_04_38_110	800.52	0	-1
Etoposide_AML_180min_r2_11_38_110	800.52	0	-1
Etoposide_AML_180min_r2_11_38_90	800.52	-142.82	-1
Etoposide_AML_180min_r2_04_38_90	800.52	-142.82	-1
Etoposide_AML_0min_6_81_168	780.18	0	-325.89
Etoposide_AML_0min_6_81_202	780.18	0	-392.89
Etoposide_AML_90min_r2_2_63_149	776.88	-142.82	-188.73
Etoposide_AML_90min_r2_2_63_183	776.88	-142.82	-345.77
Etoposide_AML_180min_2_42_91	771.39	0	-198.22
Etoposide_AML_180min_2_42_102	771.39	-142.82	-364.91
Etoposide_AML_180min_r2_09_50_102	768.45	-142.82	-1
Etoposide_AML_180min_r2_09_50_132	768.45	-142.82	-155.79
Etoposide_AML_180min_r2_09_47_96	765.3	-428.46	-97.66
Etoposide_AML_180min_r2_09_47_125	765.3	-142.82	-325.94
Etoposide_AML_0min_r2_3_28_68	764.1	-142.82	-1
Etoposide_AML_0min_r2_3_28_81	764.1	-142.82	-159.09
Etoposide_AML_0min_7_65_175	763.81	0	-255.37
Etoposide_AML_0min_7_65_134	763.81	0	-327.41
Etoposide_AML_90min_r2_8_6_16	757.16	0	-66.38
Etoposide_AML_90min_r2_8_6_17	757.16	-285.64	-267.96
Etoposide_AML_90min_r2_3_58_132	749.72	0	-131.5
Etoposide_AML_90min_r2_3_58_150	749.72	-142.82	-277.35
Etoposide_AML_90min_r2_2_69_201	749.69	-142.82	-1
Etoposide_AML_90min_r2_2_69_164	749.69	-142.82	-221.99
Etoposide_AML_180min_r2_03_36_109	749.42	-142.82	-1
Etoposide_AML_180min_r2_03_36_81	749.42	0	-9.47
Etoposide_AML_90min_1_73_186	737.83	-142.82	-1
Etoposide_AML_90min_1_73_141	737.83	0	-239.3
Etoposide_AML_0min_6_91_227	727.35	0	-89.58
Etoposide_AML_0min_6_91_189	727.35	0	-310.39
Etoposide_AML_90min_r2_6_66_148	724.85	-142.82	-29.26
Etoposide_AML_90min_r2_6_66_134	724.85	-142.82	-330.05
Etoposide_AML_90min_5_66_129	721.46	-285.64	-118.4
Etoposide_AML_90min_5_66_152	721.46	-142.82	-236.52
Etoposide_AML_90min_r2_6_73_149	721.43	0	-35.61
Etoposide_AML_90min_r2_6_73_164	721.43	428.46	247.17
Etoposide_AML_0min_r2_7_48_91	718.3	-142.82	-287.32
Etoposide_AML_0min_r2_7_48_142	718.3	-142.82	-185.14
Etoposide_AML_180min_6_30_89	710.87	0	-1
Etoposide_AML_180min_6_30_64	710.87	-142.82	-1
Etoposide_AML_0min_r2_5_30_59	710.29	0	-74.28
Etoposide_AML_0min_r2_5_30_87	710.29	0	-1
Etoposide_AML_90min_r2_8_61_134	702.4	-142.82	-170.19
Etoposide_AML_90min_r2_8_61_131	702.4	-142.82	-1
Etoposide_AML_180min_r2_10_43_92	697.64	0	-296.15
Etoposide_AML_180min_r2_10_43_131	697.64	0	-244.48
Etoposide_AML_90min_r2_5_95_190	696.98	0	-1
Etoposide_AML_90min_r2_5_95_215	696.98	-142.82	-1
Etoposide_AML_90min_4_78_187	686.59	-285.64	1
Etoposide_AML_90min_4_78_157	686.59	-428.46	-79.85
Etoposide_AML_180min_6_17_53	686.51	-142.82	-107.22
Etoposide_AML_180min_6_17_36	686.51	0	-388.36
Etoposide_AML_180min_6_74_153	682.54	-142.82	-1
Etoposide_AML_180min_6_74_210	682.54	-142.82	-58.76
Etoposide_AML_90min_3_5_11	681.3	0	1
Etoposide_AML_90min_3_5_11	681.3	-285.64	-1
Etoposide_AML_180min_6_83_173	678.39	0	-12.44
Etoposide_AML_180min_6_83_233	678.39	0	-406.62
Etoposide_AML_90min_r2_7_97_210	677.35	-142.82	-126.96
Etoposide_AML_90min_r2_7_97_200	677.35	-142.82	-1
Etoposide_AML_0min_7_53_148	666.6	0	-1
Etoposide_AML_0min_7_53_111	666.6	-142.82	-1
Etoposide_AML_0min_6_66_178	666.35	0	-123.12
Etoposide_AML_0min_6_66_138	666.35	0	-293.6
Etoposide_AML_90min_r2_5_43_101	663.45	0	-263.21
Etoposide_AML_90min_r2_5_43_85	663.45	-142.82	-29.19
Etoposide_AML_90min_4_2_5	660.25	-142.82	-2.28
Etoposide_AML_90min_4_2_5	660.25	-142.82	-269.95
Etoposide_AML_90min_r2_5_96_192	659.01	0	-1
Etoposide_AML_90min_r2_5_96_216	659.01	-142.82	-1
Etoposide_AML_180min_3_32_53	656.91	0	-1
Etoposide_AML_180min_3_32_86	656.91	0	-1
Etoposide_AML_90min_r2_4_54_118	652.34	0	-60.61
Etoposide_AML_90min_r2_4_54_126	652.34	-428.46	1
Etoposide_AML_90min_1_59_115	650	0	-100.1
Etoposide_AML_90min_1_59_150	650	0	-185.55
Etoposide_AML_0min_r2_4_90_278	647.06	-142.82	-339.58
Etoposide_AML_0min_r2_4_90_194	647.06	-142.82	-107.97
Etoposide_AML_90min_8_52_145	644.82	-142.82	-21.37
Etoposide_AML_90min_8_52_106	644.82	0	-105.56
Etoposide_AML_90min_9_4_11	644.8	-428.46	-1
Etoposide_AML_90min_9_4_9	644.8	0	-1
Etoposide_AML_180min_r2_09_12_32	639.73	0	-297.76
Etoposide_AML_180min_r2_09_12_29	639.73	0	-24.32
Etoposide_AML_90min_2_31_64	639.42	0	-56.72
Etoposide_AML_90min_2_31_82	639.42	-142.82	-184.18
Etoposide_AML_90min_r2_4_86_190	637.15	-142.82	-101.19
Etoposide_AML_90min_r2_4_86_185	637.15	-142.82	-4.87
Etoposide_AML_90min_r2_4_86_189	636.02	-142.82	-144.26
Etoposide_AML_90min_r2_4_86_184	636.02	0	1
Etoposide_AML_90min_3_78_188	634.82	0	-192.2
Etoposide_AML_90min_3_78_171	634.82	-142.82	-352.35
Etoposide_AML_90min_r2_2_72_172	626.14	0	-255.96
Etoposide_AML_90min_r2_2_72_208	626.14	0	-248.98
Etoposide_AML_0min_r2_7_95_186	624.82	-142.82	-343.75
Etoposide_AML_0min_r2_7_95_274	624.82	0	-243.93
Etoposide_AML_90min_5_23_51	624.09	-142.82	-13.73
Etoposide_AML_90min_5_23_43	624.09	0	-122.31
Etoposide_AML_180min_r2_02_30_65	620.81	0	-231.68
Etoposide_AML_180min_r2_02_30_61	620.81	0	-88.63
Etoposide_AML_0min_7_80_166	619.82	-142.82	-196.51
Etoposide_AML_0min_7_80_212	619.82	0	-211.87
Etoposide_AML_0min_4_75_187	619.67	-142.82	-96.27
Etoposide_AML_0min_4_75_164	619.67	-142.82	-179.93
Etoposide_AML_180min_6_45_128	619.56	0	-1
Etoposide_AML_180min_6_45_91	619.56	-142.82	-353.07
Etoposide_AML_180min_r2_02_25_51	613.11	-142.82	-321.47
Etoposide_AML_180min_r2_02_25_55	613.11	-142.82	-203.69
Etoposide_AML_90min_2_76_192	612	0	1
Etoposide_AML_90min_2_76_152	612	-142.82	-1
Etoposide_AML_180min_r2_08_63_159	610.28	0	-262.18
Etoposide_AML_180min_r2_08_63_126	610.28	0	1
Etoposide_AML_180min_4_42_83	608.58	142.82	399.13
Etoposide_AML_180min_4_42_92	608.58	285.64	141.05
Etoposide_AML_90min_3_76_166	608.56	-142.82	-198.22
Etoposide_AML_90min_3_76_184	608.56	-142.82	-366.07
Etoposide_AML_90min_r2_7_46_110	606.98	-285.64	-34.35
Etoposide_AML_90min_r2_7_46_104	606.98	-142.82	-0.8
Etoposide_AML_0min_r2_6_71_149	604.81	-142.82	-348.71
Etoposide_AML_0min_r2_6_71_208	604.81	-142.82	-91.23
Etoposide_AML_180min_4_40_88	603.35	-142.82	-124.01
Etoposide_AML_180min_4_40_79	603.35	0	-404.12
Etoposide_AML_180min_2_40_87	601.08	0	-172.43
Etoposide_AML_180min_2_40_97	601.08	0	-387.11
Etoposide_AML_0min_r2_5_10_30	600.64	-142.82	-323.13
Etoposide_AML_0min_r2_5_10_21	600.64	-142.82	-7.42
Etoposide_AML_0min_6_86_216	599.47	0	-1
Etoposide_AML_0min_6_86_178	599.47	0	-1
Etoposide_AML_0min_r2_8_79_167	599.02	-142.82	-335.03
Etoposide_AML_0min_r2_8_79_193	599.02	0	-167.2
Etoposide_AML_90min_r2_2_61_179	597.06	-142.82	-245.68
Etoposide_AML_90min_r2_2_61_143	597.06	0	-1
Etoposide_AML_90min_r2_1_37_100	596.3	-142.82	-223.34
Etoposide_AML_90min_r2_1_37_78	596.3	0	-8.77
Etoposide_AML_0min_r2_8_31_65	596.14	-142.82	-197.59
Etoposide_AML_0min_r2_8_31_76	596.14	0	1
Etoposide_AML_0min_3_79_233	593.49	0	-199.7
Etoposide_AML_0min_3_79_164	593.49	-142.82	-334.19
Etoposide_AML_0min_r2_3_96_265	591.35	0	-165.29
Etoposide_AML_0min_r2_3_96_210	591.35	0	-88.27
Etoposide_AML_180min_5_93_239	590.23	-142.82	-239.71
Etoposide_AML_180min_5_93_198	590.23	0	-327.91
Etoposide_AML_0min_r2_5_76_223	589.33	-142.82	-380.71
Etoposide_AML_0min_r2_5_76_152	589.33	0	-198.18
Etoposide_AML_0min_r2_2_14_39	588.78	-142.82	-1
Etoposide_AML_0min_r2_2_14_30	588.78	-142.82	-1
Etoposide_AML_0min_5_41_84	588.59	0	-58.01
Etoposide_AML_0min_5_41_107	588.59	0	-287.26
Etoposide_AML_90min_5_49_112	587.4	428.46	272.84
Etoposide_AML_90min_5_49_93	587.4	0	-1.28
Etoposide_AML_0min_5_62_125	584.44	0	-53.35
Etoposide_AML_0min_5_62_154	584.44	-142.82	-338.29
Etoposide_AML_90min_r2_1_63_131	583.04	0	-269.84
Etoposide_AML_90min_r2_1_63_161	583.04	-285.64	-195.62
Etoposide_AML_0min_r2_5_69_201	578.96	-142.82	-248.03
Etoposide_AML_0min_r2_5_69_136	578.96	0	-167.29
Etoposide_AML_90min_3_54_137	577.72	-142.82	-216.91
Etoposide_AML_90min_3_54_124	577.72	-142.82	-266.21
Etoposide_AML_90min_9_91_274	576.91	0	-107.16
Etoposide_AML_90min_9_91_188	576.91	0	-247.49
Etoposide_AML_0min_3_86_251	576.54	-142.82	-166.32
Etoposide_AML_0min_3_86_177	576.54	-142.82	-293.21
Etoposide_AML_180min_2_64_154	576.48	0	1
Etoposide_AML_180min_2_64_126	576.48	0	-348.43
Etoposide_AML_90min_r2_7_69_157	572.99	0	-135.26
Etoposide_AML_90min_r2_7_69_153	572.99	0	-134.25
Etoposide_AML_90min_r2_2_35_88	569.64	0	-1
Etoposide_AML_90min_r2_2_35_108	569.64	0	1
Etoposide_AML_180min_r2_02_6_14	569.12	0	-214.59
Etoposide_AML_180min_r2_02_6_15	569.12	-142.82	-98.28
Etoposide_AML_0min_r2_8_72_176	569.11	0	-323.14
Etoposide_AML_0min_r2_8_72_150	569.11	-142.82	-165.47
Etoposide_AML_0min_6_55_155	568.51	0	-232.32
Etoposide_AML_0min_6_55_118	568.51	0	-268.05
Etoposide_AML_90min_r2_3_81_184	561.19	-142.82	-208.47
Etoposide_AML_90min_r2_3_81_209	561.19	-142.82	-33.08
Etoposide_AML_180min_r2_10_62_131	560.69	0	-221.25
Etoposide_AML_180min_r2_10_62_182	560.69	0	-8.73
Etoposide_AML_90min_r2_4_53_124	559.19	-142.82	-274.75
Etoposide_AML_90min_r2_4_53_117	559.19	0	-238.32
Etoposide_AML_90min_r2_9_7_19	557.64	-142.82	-249.46
Etoposide_AML_90min_r2_9_7_17	557.64	-142.82	-16.77
Etoposide_AML_90min_r2_8_65_142	555.64	0	-254.7
Etoposide_AML_90min_r2_8_65_138	555.64	0	-1
Etoposide_AML_180min_4_18_32	554.67	0	-12.44
Etoposide_AML_180min_4_18_40	554.67	-142.82	-399.28
Etoposide_AML_180min_r2_07_47_121	554.03	-142.82	-18.11
Etoposide_AML_180min_r2_07_47_100	554.03	-142.82	-1
Etoposide_AML_0min_5_83_170	553.17	-285.64	-1
Etoposide_AML_0min_5_83_198	553.17	0	-75.27
Etoposide_AML_90min_5_20_38	552.56	-142.82	-4.74
Etoposide_AML_90min_5_20_45	552.56	-428.46	-205.22
Etoposide_AML_90min_9_59_124	548.77	-142.82	-14.56
Etoposide_AML_90min_9_59_179	548.77	0	-296.14
Etoposide_AML_0min_r2_7_0_0	548.16	-142.82	-251.94
Etoposide_AML_0min_r2_7_0_1	548.16	-142.82	-185.07
Etoposide_AML_90min_r2_9_71_157	547.63	0	-313.03
Etoposide_AML_90min_r2_9_71_165	547.63	0	-94.66
Etoposide_AML_180min_r2_08_25_66	545.22	-142.82	-139.74
Etoposide_AML_180min_r2_08_25_52	545.22	-142.82	-38.73
Etoposide_AML_0min_4_18_39	543.66	0	-14.2
Etoposide_AML_0min_4_18_49	543.66	0	-205.85
Etoposide_AML_180min_1_6_14	543.07	-142.82	-168.67
Etoposide_AML_180min_1_6_12	543.07	-142.82	-346.06
Etoposide_AML_90min_r2_6_72_161	539.97	0	-190.82
Etoposide_AML_90min_r2_6_72_147	539.97	-142.82	-97.39
Etoposide_AML_90min_r2_9_26_63	538.5	-142.82	-282
Etoposide_AML_90min_r2_9_26_68	538.5	-142.82	-216.2
Etoposide_AML_180min_2_42_92	538.1	0	-6.45
Etoposide_AML_180min_2_42_101	538.1	0	-396.39
Etoposide_AML_180min_2_7_11	537.63	0	-153.36
Etoposide_AML_180min_2_7_15	537.63	-142.82	-345.74
Etoposide_AML_180min_r2_03_33_76	537.51	0	-289.27
Etoposide_AML_180min_r2_03_33_98	537.51	-142.82	-192.2
Etoposide_AML_90min_r2_8_49_107	536.68	-142.82	-302.25
Etoposide_AML_90min_r2_8_49_109	536.68	-142.82	-163.75
Etoposide_AML_180min_r2_10_6_20	533.55	0	-252.87
Etoposide_AML_180min_r2_10_6_15	533.55	-142.82	-111.26
Etoposide_AML_0min_7_62_171	532.58	-142.82	-5.6
Etoposide_AML_0min_7_62_129	532.58	-142.82	-267.55
Etoposide_AML_0min_5_64_157	532.35	0	1
Etoposide_AML_0min_5_64_130	532.35	-142.82	-78.82
Etoposide_AML_90min_r2_3_83_190	530.37	0	-340.21
Etoposide_AML_90min_r2_3_83_214	530.37	0	-64.4
Etoposide_AML_0min_r2_1_91_247	530.1	0	-1
Etoposide_AML_0min_r2_1_91_198	530.1	-142.82	-1
Etoposide_AML_90min_r2_2_65_190	529.85	-142.82	-310.43
Etoposide_AML_90min_r2_2_65_154	529.85	0	-25.97
Etoposide_AML_90min_r2_3_10_21	526.8	0	-218.72
Etoposide_AML_90min_r2_3_10_20	526.8	0	-2.71
Etoposide_AML_90min_r2_3_92_235	525.64	-142.82	-239.9
Etoposide_AML_90min_r2_3_92_207	525.64	-142.82	-122.53
Etoposide_AML_0min_r2_8_31_64	523.21	0	-280.47
Etoposide_AML_0min_r2_8_31_75	523.21	0	-51.29
Etoposide_AML_90min_r2_4_54_119	522.88	-142.82	-264.98
Etoposide_AML_90min_r2_4_54_127	522.88	-142.82	-174.98
Etoposide_AML_90min_r2_7_19_49	521.28	0	-76.83
Etoposide_AML_90min_r2_7_19_47	521.28	0	-18.98
Etoposide_AML_180min_2_47_114	520.48	-142.82	-219.88
Etoposide_AML_180min_2_47_100	520.48	0	-300.19
Etoposide_AML_90min_r2_9_68_153	520.44	-142.82	-85.32
Etoposide_AML_90min_r2_9_68_160	520.44	-142.82	-1
Etoposide_AML_0min_4_18_48	518.16	0	-1
Etoposide_AML_0min_4_18_38	518.16	-142.82	-1
Etoposide_AML_180min_r2_09_49_130	517.22	0	-187.86
Etoposide_AML_180min_r2_09_49_101	517.22	0	-38.54
Etoposide_AML_90min_r2_7_61_137	516.45	-285.64	-1.47
Etoposide_AML_90min_r2_7_61_142	516.45	428.46	383.41
Etoposide_AML_90min_r2_4_40_86	516.17	-142.82	-297.36
Etoposide_AML_90min_r2_4_40_93	516.17	0	-1
Etoposide_AML_0min_4_50_110	516.12	0	-57.98
Etoposide_AML_0min_4_50_127	516.12	0	-375.44
Etoposide_AML_90min_r2_6_22_41	515.97	-428.46	-294.87
Etoposide_AML_90min_r2_6_22_46	515.97	0	-92.9
Etoposide_AML_180min_r2_11_22_68	515.55	0	-257.66
Etoposide_AML_180min_r2_04_22_68	515.55	0	-257.66
Etoposide_AML_180min_r2_11_22_57	515.55	0	-62.19
Etoposide_AML_180min_r2_04_22_57	515.55	0	-62.19
Etoposide_AML_0min_r2_6_31_68	515.39	0	-1
Etoposide_AML_0min_r2_6_31_96	515.39	-142.82	-1
Etoposide_AML_0min_r2_3_90_250	515.16	0	-1
Etoposide_AML_0min_r2_3_90_194	515.16	0	-1
Etoposide_AML_180min_2_96_176	514.48	0	-124.56
Etoposide_AML_180min_2_96_216	514.48	0	-263.49
Etoposide_AML_0min_r2_1_68_153	513.86	0	-369.49
Etoposide_AML_0min_r2_1_68_193	513.86	-428.46	-219.98
Etoposide_AML_90min_r2_6_70_142	513.41	0	1
Etoposide_AML_90min_r2_6_70_157	513.41	428.46	18.43
Etoposide_AML_180min_3_62_95	508.72	-142.82	-193.91
Etoposide_AML_180min_3_62_154	508.72	0	-246.49
Etoposide_AML_180min_5_80_208	508.57	0	-78.64
Etoposide_AML_180min_5_80_170	508.57	0	-330.75
Etoposide_AML_180min_r2_06_13_26	508.07	0	-172.24
Etoposide_AML_180min_r2_06_13_39	508.07	-142.82	-7.58
Etoposide_AML_180min_r2_06_44_120	507.09	-142.82	-265.99
Etoposide_AML_180min_r2_06_44_84	507.09	-142.82	-184.03
Etoposide_AML_90min_5_55_106	505.64	-285.64	-171.01
Etoposide_AML_90min_5_55_128	505.64	0	-235.6
Etoposide_AML_0min_r2_2_55_151	505.59	0	-337.59
Etoposide_AML_0min_r2_2_55_110	505.59	0	-1.78
Etoposide_AML_90min_8_8_19	504.94	0	-231.12
Etoposide_AML_90min_8_8_22	504.94	-142.82	-254.36
Etoposide_AML_90min_6_64_139	504.91	0	-61.36
Etoposide_AML_90min_6_64_186	504.91	0	-184.95
Etoposide_AML_90min_4_71_169	504.32	0	1
Etoposide_AML_90min_4_71_143	504.32	0	-1
Etoposide_AML_0min_r2_2_80_159	503.27	0	-384.11
Etoposide_AML_0min_r2_2_80_212	503.27	0	-81.17
Etoposide_AML_90min_3_78_170	501.69	0	-105.87
Etoposide_AML_90min_3_78_187	501.69	-142.82	-276.36
Etoposide_AML_180min_5_93_240	500.67	0	-11.16
Etoposide_AML_180min_5_93_199	500.67	-142.82	-27.79
Etoposide_AML_0min_r2_7_64_123	500.5	-142.82	-28.1
Etoposide_AML_0min_r2_7_64_193	500.5	0	-1
Etoposide_AML_90min_2_38_80	500.02	0	-41.4
Etoposide_AML_90min_2_38_102	500.02	0	-48.53
Etoposide_AML_0min_r2_6_66_137	499.43	-142.82	-344.93
Etoposide_AML_0min_r2_6_66_196	499.43	0	-142.48
Etoposide_AML_0min_r2_3_20_46	499.29	-142.82	-1
Etoposide_AML_0min_r2_3_20_53	499.29	-428.46	-1
Etoposide_AML_0min_r2_8_93_217	499.26	-142.82	-232.82
Etoposide_AML_0min_r2_8_93_192	499.26	-142.82	-227.26
Etoposide_AML_90min_r2_4_18_33	499.22	-142.82	-165.67
Etoposide_AML_90min_r2_4_18_41	499.22	-142.82	-37.26
Etoposide_AML_0min_5_64_156	498.23	0	-45.27
Etoposide_AML_0min_5_64_129	498.23	-142.82	-162.75
Etoposide_AML_90min_6_90_269	497.63	-142.82	-74.92
Etoposide_AML_90min_6_90_201	497.63	0	-186.48
Etoposide_AML_180min_6_11_33	495.73	-142.82	-1
Etoposide_AML_180min_6_11_23	495.73	-142.82	-287.34
Etoposide_AML_90min_r2_5_40_92	494.87	0	-349.57
Etoposide_AML_90min_r2_5_40_80	494.87	-142.82	-299.26
Etoposide_AML_90min_r2_4_80_172	493.59	-142.82	-10.08
Etoposide_AML_90min_r2_4_80_177	493.59	0	1
Etoposide_AML_90min_3_39_89	492.85	-142.82	-244.64
Etoposide_AML_90min_3_39_99	492.85	-142.82	-363.38
Etoposide_AML_90min_r2_3_79_205	492.72	-142.82	-1
Etoposide_AML_90min_r2_3_79_180	492.72	-142.82	-1
Etoposide_AML_0min_1_88_292	492.68	0	-1
Etoposide_AML_0min_1_88_196	492.68	-142.82	-1
Etoposide_AML_180min_7_89_186	491.91	0	-219.34
Etoposide_AML_180min_7_89_269	491.91	-142.82	-225.13
Etoposide_AML_90min_r2_8_44_96	491.51	-142.82	-308.51
Etoposide_AML_90min_r2_8_44_100	491.51	-142.82	-80.71
Etoposide_AML_90min_r2_5_71_143	489.59	0	-252.85
Etoposide_AML_90min_r2_5_71_165	489.59	0	-180.36
Etoposide_AML_90min_3_89_213	489.33	142.82	-1
Etoposide_AML_90min_3_89_193	489.33	-142.82	-461.43
Etoposide_AML_0min_6_76_193	488.96	-142.82	-1
Etoposide_AML_0min_6_76_157	488.96	0	-1
Etoposide_AML_0min_4_59_131	487.97	0	-1
Etoposide_AML_0min_4_59_151	487.97	0	-318.27
Etoposide_AML_90min_8_88_180	487.86	-142.82	-121.8
Etoposide_AML_90min_8_88_237	487.86	-142.82	-186.05
Etoposide_AML_180min_2_85_163	486.82	-428.46	-1
Etoposide_AML_180min_2_85_195	486.82	0	-1
Etoposide_AML_90min_r2_5_47_94	486.41	-142.82	-247.98
Etoposide_AML_90min_r2_5_47_112	486.41	-142.82	-237.28
Etoposide_AML_0min_r2_2_9_24	484.74	-428.46	-277.67
Etoposide_AML_0min_r2_2_9_20	484.74	-428.46	1
Etoposide_AML_0min_7_45_94	484.5	-142.82	-216.45
Etoposide_AML_0min_7_45_125	484.5	0	-238.05
Etoposide_AML_90min_r2_7_88_186	483.92	-142.82	-254.43
Etoposide_AML_90min_r2_7_88_192	483.92	-142.82	-90.6
Etoposide_AML_0min_r2_2_72_144	483.66	-142.82	-346.77
Etoposide_AML_0min_r2_2_72_196	483.66	-142.82	-293.05
Etoposide_AML_0min_6_79_165	482.81	-142.82	-111.82
Etoposide_AML_0min_6_79_198	482.81	-142.82	-267.04
Etoposide_AML_90min_r2_1_53_136	482.11	-142.82	-203.34
Etoposide_AML_90min_r2_1_53_108	482.11	-142.82	-105.67
Etoposide_AML_0min_r2_6_53_157	481.56	-142.82	-324.06
Etoposide_AML_0min_r2_6_53_108	481.56	-142.82	-171.02
Etoposide_AML_180min_5_91_235	481.01	-142.82	-1
Etoposide_AML_180min_5_91_195	481.01	-142.82	-263.47
Etoposide_AML_180min_2_84_161	480.65	0	-86.63
Etoposide_AML_180min_2_84_193	480.65	0	-130.19
Etoposide_AML_180min_r2_07_67_140	479.72	0	-1
Etoposide_AML_180min_r2_07_67_163	479.72	-142.82	-1
Etoposide_AML_0min_1_63_220	478.94	0	-198.73
Etoposide_AML_0min_1_63_142	478.94	0	-249.54
Etoposide_AML_90min_r2_5_19_46	478.24	0	-284.4
Etoposide_AML_90min_r2_5_19_41	478.24	0	-23.51
Etoposide_AML_180min_r2_05_27_67	478.14	0	-322.34
Etoposide_AML_180min_r2_05_27_52	478.14	-428.46	-204.24
Etoposide_AML_0min_r2_4_64_201	477.98	-142.82	-253.65
Etoposide_AML_0min_r2_4_64_141	477.98	-142.82	-90.74
Etoposide_AML_0min_6_58_163	477.9	0	-1
Etoposide_AML_0min_6_58_123	477.9	0	-1
Etoposide_AML_0min_7_24_55	477.68	0	-25.59
Etoposide_AML_0min_7_24_70	477.68	0	-372.05
Etoposide_AML_0min_4_44_100	477.22	0	-61.41
Etoposide_AML_0min_4_44_114	477.22	0	-331.31
Etoposide_AML_90min_r2_9_33_85	476.84	0	-330.98
Etoposide_AML_90min_r2_9_33_82	476.84	0	-72.63
Etoposide_AML_0min_6_22_62	476.79	-142.82	-99.51
Etoposide_AML_0min_6_22_46	476.79	-142.82	-202.25
Etoposide_AML_0min_r2_1_63_176	476.24	-142.82	-239.61
Etoposide_AML_0min_r2_1_63_142	476.24	-142.82	-220.26
Etoposide_AML_0min_3_79_163	475.93	-142.82	-189.44
Etoposide_AML_0min_3_79_234	475.93	-142.82	-256.28
Etoposide_AML_90min_r2_9_28_72	474.85	-142.82	-167.49
Etoposide_AML_90min_r2_9_28_68	474.85	0	-35.81
Etoposide_AML_0min_r2_1_42_116	474.55	-142.82	-129.04
Etoposide_AML_0min_r2_1_42_97	474.55	-142.82	-1
Etoposide_AML_180min_r2_08_40_81	473.79	0	-315.37
Etoposide_AML_180min_r2_08_40_104	473.79	0	-168.75
Etoposide_AML_0min_6_69_144	472.98	0	-130.18
Etoposide_AML_0min_6_69_184	472.98	0	-220.99
Etoposide_AML_90min_3_64_142	471.54	0	1
Etoposide_AML_90min_3_64_157	471.54	0	-256.04
Etoposide_AML_90min_4_35_91	470.73	0	-311.49
Etoposide_AML_90min_4_35_72	470.73	-142.82	-316.04
Etoposide_AML_90min_r2_7_96_208	470.67	0	-291.2
Etoposide_AML_90min_r2_7_96_198	470.67	0	-40.03
Etoposide_AML_180min_1_31_71	470.59	0	-29.9
Etoposide_AML_180min_1_31_52	470.59	0	-66.11
Etoposide_AML_90min_5_87_169	470.24	0	-2.01
Etoposide_AML_90min_5_87_199	470.24	0	-320.9
Etoposide_AML_0min_4_41_90	467.55	0	-91.83
Etoposide_AML_0min_4_41_106	467.55	0	-373.97
Etoposide_AML_90min_r2_8_15_36	467.12	0	-1
Etoposide_AML_90min_r2_8_15_35	467.12	0	1
Etoposide_AML_180min_6_50_104	466.57	0	-201.14
Etoposide_AML_180min_6_50_145	466.57	0	-355.05
Etoposide_AML_180min_5_44_117	466.37	-142.82	-5.57
Etoposide_AML_180min_5_44_96	466.37	0	-297.57
Etoposide_AML_0min_r2_2_40_81	466.04	-142.82	-240.37
Etoposide_AML_0min_r2_2_40_112	466.04	-142.82	-158.72
Etoposide_AML_90min_4_50_100	465.7	-142.82	-237.91
Etoposide_AML_90min_4_50_122	465.7	-142.82	-358.13
Etoposide_AML_0min_r2_4_81_250	465.37	-142.82	-1
Etoposide_AML_0min_r2_4_81_177	465.37	-142.82	-1
Etoposide_AML_0min_r2_7_28_85	465.31	0	-176.19
Etoposide_AML_0min_r2_7_28_54	465.31	-142.82	-174.91
Etoposide_AML_180min_6_2_4	464.72	0	-12.08
Etoposide_AML_180min_6_2_8	464.72	0	-416.22
Etoposide_AML_0min_5_88_178	464.71	-142.82	-44.2
Etoposide_AML_0min_5_88_211	464.71	-142.82	-364.81
Etoposide_AML_90min_6_40_112	463.96	0	-1
Etoposide_AML_90min_6_40_85	463.96	0	-1
Etoposide_AML_90min_3_52_132	462.17	-142.82	-99.65
Etoposide_AML_90min_3_52_119	462.17	0	-319.64
Etoposide_AML_90min_3_52_120	462.12	0	-206.39
Etoposide_AML_90min_3_52_133	462.12	-142.82	-212.38
Etoposide_AML_90min_3_43_97	461.1	-142.82	-64.43
Etoposide_AML_90min_3_43_108	461.1	-142.82	-332.4
Etoposide_AML_0min_r2_6_57_167	460.14	0	-333.19
Etoposide_AML_0min_r2_6_57_116	460.14	-142.82	-77.29
Etoposide_AML_180min_3_32_87	459.79	-142.82	-22
Etoposide_AML_180min_3_32_54	459.79	0	-394.4
Etoposide_AML_90min_r2_7_42_100	459.44	-142.82	-140.07
Etoposide_AML_90min_r2_7_42_93	459.44	-142.82	-42.76
Etoposide_AML_90min_r2_1_74_191	459.4	0	-1
Etoposide_AML_90min_r2_1_74_156	459.4	-142.82	-1
Etoposide_AML_180min_r2_06_50_136	458.77	0	-346.62
Etoposide_AML_180min_r2_06_50_99	458.77	0	-90.34
Etoposide_AML_90min_1_60_152	458.56	-142.82	-228.38
Etoposide_AML_90min_1_60_117	458.56	-142.82	-301.33
Etoposide_AML_90min_r2_8_66_139	457.21	0	-61.41
Etoposide_AML_90min_r2_8_66_143	457.21	0	-47.77
Etoposide_AML_0min_1_55_123	456.64	-142.82	-78.8
Etoposide_AML_0min_1_55_192	456.64	-428.46	-251.19
Etoposide_AML_90min_r2_9_79_176	456.6	0	-324.94
Etoposide_AML_90min_r2_9_79_182	456.6	-142.82	-154.19
Etoposide_AML_0min_r2_3_11_31	456.54	-142.82	-274.47
Etoposide_AML_0min_r2_3_11_29	456.54	-142.82	-15.94
Etoposide_AML_0min_5_53_132	456.25	428.46	332.68
Etoposide_AML_0min_5_53_107	456.25	0	-201.06
Etoposide_AML_180min_6_5_11	456.16	0	-355.9
Etoposide_AML_180min_6_5_15	456.16	0	-414.62
Etoposide_AML_0min_4_65_143	454.67	0	-1
Etoposide_AML_0min_4_65_167	454.67	0	-72.14
Etoposide_AML_180min_r2_02_6_16	454.02	0	1
Etoposide_AML_180min_r2_02_6_15	454.02	-285.64	1
Etoposide_AML_90min_1_5_10	453.18	0	1
Etoposide_AML_90min_1_5_12	453.18	0	-68.96
Etoposide_AML_0min_7_61_169	452.85	0	-243.61
Etoposide_AML_0min_7_61_127	452.85	-142.82	-312.14
Etoposide_AML_180min_r2_04_2_8	452.45	0	-78.99
Etoposide_AML_180min_r2_11_2_8	452.45	0	-78.99
Etoposide_AML_180min_r2_04_2_12	452.45	-142.82	-39.85
Etoposide_AML_180min_r2_11_2_12	452.45	-142.82	-39.85
Etoposide_AML_90min_r2_3_36_81	450.28	0	-341.03
Etoposide_AML_90min_r2_3_36_92	450.28	0	-323.15
Etoposide_AML_180min_5_65_141	449.98	0	-151.27
Etoposide_AML_180min_5_65_168	449.98	-142.82	-254.92
Etoposide_AML_180min_6_65_135	449.94	-142.82	-46.28
Etoposide_AML_180min_6_65_189	449.94	0	-389.46
Etoposide_AML_90min_4_2_6	449.71	0	-1
Etoposide_AML_90min_4_2_4	449.71	-142.82	-241.17
Etoposide_AML_180min_6_78_163	449.44	0	-202.62
Etoposide_AML_180min_6_78_219	449.44	-142.82	-300.78
Etoposide_AML_90min_r2_5_32_76	448.38	-142.82	-291.54
Etoposide_AML_90min_r2_5_32_66	448.38	-142.82	-267.97
Etoposide_AML_90min_r2_6_15_29	447.65	0	-194.41
Etoposide_AML_90min_r2_6_15_31	447.65	0	-113.57
Etoposide_AML_90min_3_92_198	445.64	-142.82	1
Etoposide_AML_90min_3_92_219	445.64	0	-230.01
Etoposide_AML_180min_6_79_221	445.13	0	-1
Etoposide_AML_180min_6_79_165	445.13	0	-1
Etoposide_AML_180min_4_86_201	444.96	0	1
Etoposide_AML_180min_4_86_176	444.96	0	-1
Etoposide_AML_90min_r2_5_95_214	444.68	0	-300.05
Etoposide_AML_90min_r2_5_95_191	444.68	0	-295.97
Etoposide_AML_0min_r2_1_88_193	444.53	-142.82	-350.87
Etoposide_AML_0min_r2_1_88_241	444.53	0	-63.77
Etoposide_AML_90min_r2_7_2_5	444.38	0	-331.06
Etoposide_AML_90min_r2_7_2_5	444.38	0	-5.07
Etoposide_AML_180min_4_93_218	443.98	0	-282.22
Etoposide_AML_180min_4_93_190	443.98	0	-306.26
Etoposide_AML_180min_r2_09_69_138	443.46	-142.82	-173.83
Etoposide_AML_180min_r2_09_69_174	443.46	-142.82	-132.41
Etoposide_AML_0min_r2_6_68_199	443.33	-142.82	-356.74
Etoposide_AML_0min_r2_6_68_141	443.33	-142.82	-79.8
Etoposide_AML_180min_r2_04_60_133	442.62	-142.82	-39.73
Etoposide_AML_180min_r2_11_60_133	442.62	-142.82	-39.73
Etoposide_AML_180min_r2_11_60_162	442.62	-142.82	1
Etoposide_AML_180min_r2_04_60_162	442.62	-142.82	1
Etoposide_AML_90min_r2_7_38_92	442.58	-142.82	-303.53
Etoposide_AML_90min_r2_7_38_86	442.58	-142.82	-224.37
Etoposide_AML_180min_2_64_125	441.89	-142.82	0
Etoposide_AML_180min_2_64_153	441.89	0	-309.31
Etoposide_AML_180min_4_17_39	441.82	-142.82	-37.89
Etoposide_AML_180min_4_17_29	441.82	0	-92.2
Etoposide_AML_180min_5_81_210	441.45	-142.82	-1
Etoposide_AML_180min_5_81_173	441.45	0	-134.45
Etoposide_AML_180min_r2_02_21_47	437.1	0	-269.32
Etoposide_AML_180min_r2_02_21_44	437.1	-142.82	-96.78
Etoposide_AML_0min_5_49_125	437	-142.82	-359.79
Etoposide_AML_0min_5_49_100	437	-142.82	-361.2
Etoposide_AML_0min_r2_2_73_147	436.51	-142.82	-278.38
Etoposide_AML_0min_r2_2_73_198	436.51	0	-152.33
Etoposide_AML_90min_1_22_43	436.4	0	-104.11
Etoposide_AML_90min_1_22_55	436.4	0	-253.68
Etoposide_AML_0min_r2_6_43_132	436.29	-142.82	-1
Etoposide_AML_0min_r2_6_43_91	436.29	-142.82	-1
Etoposide_AML_0min_r2_5_46_135	435.64	0	-222.9
Etoposide_AML_0min_r2_5_46_94	435.64	-142.82	-201.97
Etoposide_AML_180min_r2_02_0_1	435.48	-142.82	-101.44
Etoposide_AML_180min_r2_02_0_0	435.48	-142.82	-75.62
Etoposide_AML_0min_3_87_179	435.42	0	-27.07
Etoposide_AML_0min_3_87_254	435.42	0	-321.86
Etoposide_AML_180min_5_3_6	434.67	0	-1
Etoposide_AML_180min_5_3_9	434.67	0	-305.82
Etoposide_AML_90min_r2_7_82_176	434.51	428.46	-1
Etoposide_AML_90min_r2_7_82_182	434.51	285.64	-1
Etoposide_AML_0min_r2_4_59_134	433.87	-142.82	-354.02
Etoposide_AML_0min_r2_4_59_191	433.87	-142.82	-335.3
Etoposide_AML_180min_r2_06_54_107	433.58	0	-234.5
Etoposide_AML_180min_r2_06_54_144	433.58	-142.82	-93.76
Etoposide_AML_180min_1_29_51	433.49	-142.82	-82.63
Etoposide_AML_180min_1_29_66	433.49	-142.82	-226.68
Etoposide_AML_90min_1_73_187	432.92	0	1
Etoposide_AML_90min_1_73_142	432.92	0	-86.49
Etoposide_AML_0min_r2_3_49_108	432.66	-142.82	-334.34
Etoposide_AML_0min_r2_3_49_135	432.66	0	-297.48
Etoposide_AML_0min_r2_2_63_129	432.63	0	-1
Etoposide_AML_0min_r2_2_63_175	432.63	-142.82	-1
Etoposide_AML_90min_7_82_255	432.5	0	-153.06
Etoposide_AML_90min_7_82_166	432.5	0	-236.78
Etoposide_AML_90min_r2_9_47_117	432.36	0	-336.01
Etoposide_AML_90min_r2_9_47_117	432.36	-142.82	-1.42
Etoposide_AML_90min_r2_4_73_162	432.12	0	-289.92
Etoposide_AML_90min_r2_4_73_155	432.12	0	-173.95
Etoposide_AML_180min_r2_06_21_60	431.14	-142.82	-342.68
Etoposide_AML_180min_r2_06_21_42	431.14	0	-42.15
Etoposide_AML_90min_r2_3_98_218	431.04	0	-125.28
Etoposide_AML_90min_r2_3_98_246	431.04	0	-1
Etoposide_AML_90min_r2_6_70_143	430.96	-142.82	-259.23
Etoposide_AML_90min_r2_6_70_156	430.96	0	-149.74
Etoposide_AML_0min_r2_8_71_149	430.92	-142.82	-256.95
Etoposide_AML_0min_r2_8_71_174	430.92	-142.82	-253.34
Etoposide_AML_90min_6_41_114	430.85	-142.82	-101.67
Etoposide_AML_90min_6_41_86	430.85	0	-325.24
Etoposide_AML_90min_r2_4_25_56	430.83	-142.82	-219.58
Etoposide_AML_90min_r2_4_25_49	430.83	-142.82	-160.03
Etoposide_AML_180min_r2_05_70_168	430.7	-142.82	-301.27
Etoposide_AML_180min_r2_05_70_134	430.7	-142.82	-5.35
Etoposide_AML_90min_r2_8_71_151	430.57	0	-127.35
Etoposide_AML_90min_r2_8_71_151	430.57	-142.82	-75.15
Etoposide_AML_90min_7_82_167	430.32	0	-122.03
Etoposide_AML_90min_7_82_256	430.32	0	-158.6
Etoposide_AML_90min_1_48_124	429.93	0	-192.51
Etoposide_AML_90min_1_48_95	429.93	-142.82	-322.87
Etoposide_AML_90min_r2_4_39_90	429.86	-142.82	-241.52
Etoposide_AML_90min_r2_4_39_84	429.86	0	-65.56
Etoposide_AML_90min_r2_5_87_196	429.82	0	-302.41
Etoposide_AML_90min_r2_5_87_174	429.82	-142.82	-108.84
Etoposide_AML_90min_r2_8_31_73	429.23	0	-154.44
Etoposide_AML_90min_r2_8_31_71	429.23	0	-39.23
Etoposide_AML_0min_6_69_145	429.12	0	-153.41
Etoposide_AML_0min_6_69_183	429.12	0	-215.06
Etoposide_AML_0min_2_72_142	428.21	0	-143.5
Etoposide_AML_0min_2_72_229	428.21	-142.82	-266.92
Etoposide_AML_180min_3_54_84	427.64	-142.82	-1
Etoposide_AML_180min_3_54_136	427.64	-142.82	-1
Etoposide_AML_0min_6_51_146	427.35	0	1
Etoposide_AML_0min_6_51_111	427.35	0	-1
Etoposide_AML_90min_r2_8_4_12	427.03	-142.82	-141.65
Etoposide_AML_90min_r2_8_4_12	427.03	-142.82	-128.19
Etoposide_AML_90min_r2_3_95_213	426.19	0	-291.95
Etoposide_AML_90min_r2_3_95_240	426.19	0	-277.52
Etoposide_AML_180min_6_63_184	426.04	0	-276.29
Etoposide_AML_180min_6_63_131	426.04	0	-353.44
Etoposide_AML_180min_r2_07_17_46	426.03	0	-4.56
Etoposide_AML_180min_r2_07_17_39	426.03	0	1
Etoposide_AML_90min_r2_4_39_83	425.48	0	-245.6
Etoposide_AML_90min_r2_4_39_91	425.48	0	-120.87
Etoposide_AML_180min_4_49_104	424.3	-142.82	-114.8
Etoposide_AML_180min_4_49_114	424.3	-142.82	-305.45
Etoposide_AML_90min_r2_6_59_136	423.33	-142.82	-263.85
Etoposide_AML_90min_r2_6_59_121	423.33	0	-121.6
Etoposide_AML_90min_r2_8_96_201	422.53	-142.82	-1
Etoposide_AML_90min_r2_8_96_201	422.53	-142.82	-1
Etoposide_AML_180min_5_40_108	422.48	0	-46.62
Etoposide_AML_180min_5_40_89	422.48	0	-321.15
Etoposide_AML_90min_r2_5_81_184	422.19	-428.46	1
Etoposide_AML_90min_r2_5_81_164	422.19	-428.46	1
Etoposide_AML_0min_4_52_134	420.98	-428.46	-77.51
Etoposide_AML_0min_4_52_115	420.98	-285.64	-239.59
Etoposide_AML_90min_r2_6_66_135	420.1	0	-326.31
Etoposide_AML_90min_r2_6_66_149	420.1	-428.46	-74.41
Etoposide_AML_0min_5_13_32	419.22	-142.82	-41.58
Etoposide_AML_0min_5_13_23	419.22	-142.82	-250.79
Etoposide_AML_180min_r2_08_51_131	419.09	0	-331.15
Etoposide_AML_180min_r2_08_51_106	419.09	-142.82	-73.17
Etoposide_AML_90min_1_76_195	417.97	-142.82	-1
Etoposide_AML_90min_1_76_147	417.97	-142.82	-1
Etoposide_AML_90min_r2_1_85_216	417.36	0	-1
Etoposide_AML_90min_r2_1_85_179	417.36	0	-1
Etoposide_AML_90min_r2_6_6_11	417.28	-142.82	-245.82
Etoposide_AML_90min_r2_6_6_14	417.28	0	-108.66
Etoposide_AML_90min_3_44_110	417.19	0	-1
Etoposide_AML_90min_3_44_100	417.19	0	-1
Etoposide_AML_90min_r2_5_77_156	417.05	0	-313.06
Etoposide_AML_90min_r2_5_77_175	417.05	0	-78.97
Etoposide_AML_90min_r2_9_63_150	416.52	-142.82	-329.83
Etoposide_AML_90min_r2_9_63_146	416.52	0	-77.04
Etoposide_AML_180min_r2_04_15_49	416.14	0	-239.88
Etoposide_AML_180min_r2_11_15_49	416.14	0	-239.88
Etoposide_AML_180min_r2_04_15_41	416.14	0	-68.31
Etoposide_AML_180min_r2_11_15_41	416.14	0	-68.31
Etoposide_AML_90min_r2_3_18_37	416.01	-142.82	-347.25
Etoposide_AML_90min_r2_3_18_43	416.01	-142.82	-71.11
Etoposide_AML_90min_r2_5_34_79	415.92	0	-1
Etoposide_AML_90min_r2_5_34_68	415.92	-142.82	-1
Etoposide_AML_0min_5_57_142	415.51	0	1
Etoposide_AML_0min_5_57_115	415.51	-142.82	-1
Etoposide_AML_180min_4_93_189	415.47	0	-253.41
Etoposide_AML_180min_4_93_217	415.47	-142.82	-301.73
Etoposide_AML_180min_1_49_110	414.48	0	-104.98
Etoposide_AML_180min_1_49_81	414.48	0	-208.73
Etoposide_AML_180min_r2_06_52_141	414.33	0	-274.22
Etoposide_AML_180min_r2_06_52_104	414.33	0	-65.25
Etoposide_AML_0min_r2_8_44_106	413.27	-142.82	-147.39
Etoposide_AML_0min_r2_8_44_90	413.27	-142.82	-45.24
Etoposide_AML_90min_5_84_162	413.09	-142.82	-76.37
Etoposide_AML_90min_5_84_191	413.09	-142.82	-150.68
Etoposide_AML_90min_7_95_291	413.07	-142.82	-1
Etoposide_AML_90min_7_95_193	413.07	-142.82	-1
Etoposide_AML_180min_3_52_131	412.75	0	-160.71
Etoposide_AML_180min_3_52_82	412.75	0	-363.57
Etoposide_AML_180min_r2_11_40_95	412.38	0	-293.26
Etoposide_AML_180min_r2_04_40_95	412.38	0	-293.26
Etoposide_AML_180min_r2_11_40_113	412.38	0	-110.9
Etoposide_AML_180min_r2_04_40_113	412.38	0	-110.9
Etoposide_AML_180min_2_89_202	412.33	0	1
Etoposide_AML_180min_2_89_168	412.33	0	-400.24
Etoposide_AML_90min_7_97_297	412	-142.82	-71.62
Etoposide_AML_90min_7_97_198	412	-142.82	-388.77
Etoposide_AML_0min_4_19_50	411.1	-142.82	-325.17
Etoposide_AML_0min_4_19_40	411.1	-142.82	-348.66
Etoposide_AML_180min_r2_03_29_90	410.44	-142.82	-345.74
Etoposide_AML_180min_r2_03_29_70	410.44	-142.82	-18.32
Etoposide_AML_90min_r2_3_11_24	410.39	-142.82	-279.11
Etoposide_AML_90min_r2_3_11_22	410.39	-142.82	-64.41
Etoposide_AML_90min_2_84_211	410	0	-189.09
Etoposide_AML_90min_2_84_166	410	0	-275.09
Etoposide_AML_90min_9_4_10	409.61	-142.82	-17.9
Etoposide_AML_90min_9_4_12	409.61	-142.82	-221.74
Etoposide_AML_90min_r2_9_42_105	409.08	-142.82	-238.49
Etoposide_AML_90min_r2_9_42_103	409.08	0	-83.42
Etoposide_AML_0min_6_55_117	408.18	0	1
Etoposide_AML_0min_6_55_156	408.18	0	-26.89
Etoposide_AML_90min_5_53_124	408.18	0	-240.74
Etoposide_AML_90min_5_53_101	408.18	-142.82	-297.15
Etoposide_AML_90min_2_55_139	408.04	0	-164.43
Etoposide_AML_90min_2_55_110	408.04	0	-291.4
Etoposide_AML_0min_4_67_146	407.28	-142.82	-28.15
Etoposide_AML_0min_4_67_171	407.28	0	-343.14
Etoposide_AML_180min_r2_04_67_171	406.9	-142.82	-201.5
Etoposide_AML_180min_r2_11_67_171	406.9	-142.82	-201.5
Etoposide_AML_180min_r2_11_67_143	406.9	-142.82	-190.66
Etoposide_AML_180min_r2_04_67_143	406.9	-142.82	-190.66
Etoposide_AML_90min_5_55_127	406.71	0	-1
Etoposide_AML_90min_5_55_105	406.71	0	-1
Etoposide_AML_0min_r2_8_82_172	406.7	0	-255.56
Etoposide_AML_0min_r2_8_82_197	406.7	0	-79.15
Etoposide_AML_0min_5_90_214	406.56	0	1
Etoposide_AML_0min_5_90_182	406.56	0	-287.85
Etoposide_AML_90min_3_17_42	406.23	-142.82	97.23
Etoposide_AML_90min_3_17_37	406.23	-142.82	-70.97
Etoposide_AML_90min_5_27_51	406.22	0	1
Etoposide_AML_90min_5_27_59	406.22	0	-380.52
Etoposide_AML_90min_r2_9_39_95	405.96	-142.82	-231.48
Etoposide_AML_90min_r2_9_39_98	405.96	-142.82	-226.71
Etoposide_AML_180min_r2_08_42_87	405.28	-142.82	-4.25
Etoposide_AML_180min_r2_08_42_109	405.28	0	1
Etoposide_AML_180min_r2_07_65_160	404.89	-142.82	-1
Etoposide_AML_180min_r2_07_65_133	404.89	-142.82	-1
Etoposide_AML_90min_2_10_21	403.21	-142.82	-49.23
Etoposide_AML_90min_2_10_26	403.21	-142.82	-261.1
Etoposide_AML_90min_r2_3_79_204	402.75	-142.82	-111.4
Etoposide_AML_90min_r2_3_79_181	402.75	0	-1
Etoposide_AML_90min_r2_9_90_199	402.7	-142.82	-140.36
Etoposide_AML_90min_r2_9_90_202	402.7	-142.82	-113.57
Etoposide_AML_0min_r2_4_70_221	401.57	0	-354.47
Etoposide_AML_0min_r2_4_70_154	401.57	0	-260.16
Etoposide_AML_180min_1_9_17	400.97	0	-179.97
Etoposide_AML_180min_1_9_20	400.97	-142.82	-215.94
Etoposide_AML_180min_5_58_130	400.87	0	-74.77
Etoposide_AML_180min_5_58_152	400.87	0	-159.39
Etoposide_AML_90min_5_44_83	400.83	0	-122.18
Etoposide_AML_90min_5_44_99	400.83	0	-238.33
Etoposide_AML_180min_1_35_58	399.98	428.46	147.04
Etoposide_AML_180min_1_35_80	399.98	0	-263.51
Etoposide_AML_0min_6_96_203	399.97	-142.82	-136.98
Etoposide_AML_0min_6_96_243	399.97	0	-155.17
Etoposide_AML_180min_r2_06_13_40	399.97	0	-331.42
Etoposide_AML_180min_r2_06_13_27	399.97	-142.82	-178.97
Etoposide_AML_90min_r2_6_98_218	399.8	-142.82	-274.03
Etoposide_AML_90min_r2_6_98_202	399.8	-142.82	-117.26
Etoposide_AML_0min_r2_3_67_143	399.62	-142.82	-343.76
Etoposide_AML_0min_r2_3_67_181	399.62	-142.82	-44.16
Etoposide_AML_0min_r2_8_41_97	398.91	0	-261.04
Etoposide_AML_0min_r2_8_41_85	398.91	-142.82	-28.26
Etoposide_AML_0min_2_72_230	398.55	0	-113.02
Etoposide_AML_0min_2_72_141	398.55	0	-122.7
Etoposide_AML_90min_r2_9_73_161	398.34	0	-333.82
Etoposide_AML_90min_r2_9_73_170	398.34	0	-218.24
Etoposide_AML_90min_r2_6_50_101	396.75	0	-275.68
Etoposide_AML_90min_r2_6_50_115	396.75	0	-72.64
Etoposide_AML_180min_6_91_253	396.72	0	-31.35
Etoposide_AML_180min_6_91_189	396.72	0	-107.18
Etoposide_AML_90min_7_43_132	396.45	0	-223.48
Etoposide_AML_90min_7_43_88	396.45	0	-281.64
Etoposide_AML_0min_r2_1_46_104	396.34	0	-357.06
Etoposide_AML_0min_r2_1_46_128	396.34	-142.82	-34.42
Etoposide_AML_0min_r2_2_73_197	396.22	0	-358.85
Etoposide_AML_0min_r2_2_73_146	396.22	0	-1
Etoposide_AML_90min_r2_6_48_110	395.04	0	-273.86
Etoposide_AML_90min_r2_6_48_97	395.04	-428.46	-83.17
Etoposide_AML_0min_r2_8_38_79	394.91	0	-335.85
Etoposide_AML_0min_r2_8_38_92	394.91	0	-177.43
Etoposide_AML_90min_r2_6_33_63	394.56	-142.82	-292.2
Etoposide_AML_90min_r2_6_33_74	394.56	0	-271.17
Etoposide_AML_90min_6_29_65	394.04	0	-1
Etoposide_AML_90min_6_29_79	394.04	-428.46	-39.68
Etoposide_AML_90min_r2_6_9_19	393.84	-142.82	-1
Etoposide_AML_90min_r2_6_9_17	393.84	-142.82	-1
Etoposide_AML_180min_r2_11_38_109	392.27	0	-329.52
Etoposide_AML_180min_r2_04_38_109	392.27	0	-329.52
Etoposide_AML_180min_r2_11_38_91	392.27	-142.82	-11.79
Etoposide_AML_180min_r2_04_38_91	392.27	-142.82	-11.79
Etoposide_AML_0min_5_53_133	391.88	-142.82	-240.09
Etoposide_AML_0min_5_53_108	391.88	-142.82	-264.41
Etoposide_AML_180min_r2_08_27_72	391.48	0	-224.01
Etoposide_AML_180min_r2_08_27_55	391.48	0	-1
Etoposide_AML_90min_r2_8_77_164	391.47	-142.82	-79.93
Etoposide_AML_90min_r2_8_77_163	391.47	0	1
Etoposide_AML_90min_4_47_95	391.16	0	-38.06
Etoposide_AML_90min_4_47_117	391.16	-142.82	-101.83
Etoposide_AML_0min_7_88_232	390.9	-142.82	-1
Etoposide_AML_0min_7_88_184	390.9	-142.82	-1
Etoposide_AML_90min_r2_5_80_161	390.85	-428.46	-349.28
Etoposide_AML_90min_r2_5_80_181	390.85	0	-320.19
Etoposide_AML_0min_r2_4_79_172	390.73	0	-72.97
Etoposide_AML_0min_r2_4_79_245	390.73	0	1
Etoposide_AML_0min_r2_8_35_85	389.8	-142.82	-310.12
Etoposide_AML_0min_r2_8_35_74	389.8	-142.82	-95.67
Etoposide_AML_90min_r2_9_26_69	389.55	-142.82	-1
Etoposide_AML_90min_r2_9_26_64	389.55	-142.82	-1
Etoposide_AML_90min_r2_6_63_142	389.51	428.46	-1
Etoposide_AML_90min_r2_6_63_129	389.51	0	1
Etoposide_AML_0min_5_76_154	389.46	-142.82	-345.89
Etoposide_AML_0min_5_76_181	389.46	0	-375.26
Etoposide_AML_90min_7_97_197	389.45	-142.82	-1
Etoposide_AML_90min_7_97_298	389.45	-428.46	-336.52
Etoposide_AML_0min_r2_3_55_120	388.83	-142.82	-163.86
Etoposide_AML_0min_r2_3_55_152	388.83	0	-97.43
Etoposide_AML_180min_r2_04_28_71	388.33	0	-1
Etoposide_AML_180min_r2_11_28_71	388.33	0	-1
Etoposide_AML_180min_r2_04_28_83	388.33	-142.82	-1
Etoposide_AML_180min_r2_11_28_83	388.33	-142.82	-1
Etoposide_AML_0min_4_98_209	387.98	0	-319.76
Etoposide_AML_0min_4_98_243	387.98	0	-425.35
Etoposide_AML_180min_4_55_114	387.68	0	-264.99
Etoposide_AML_180min_4_55_124	387.68	0	-312.17
Etoposide_AML_90min_r2_7_84_185	387.36	0	-262.83
Etoposide_AML_90min_r2_7_84_179	387.36	-142.82	-110.68
Etoposide_AML_0min_r2_6_73_213	387.27	0	-326.77
Etoposide_AML_0min_r2_6_73_154	387.27	0	-317.01
Etoposide_AML_180min_2_23_49	387.21	0	-1
Etoposide_AML_180min_2_23_52	387.21	-142.82	-1
Etoposide_AML_90min_r2_3_29_60	386.88	428.46	31.88
Etoposide_AML_90min_r2_3_29_71	386.88	285.64	203.71
Etoposide_AML_90min_7_90_280	386.82	-142.82	-364.1
Etoposide_AML_90min_7_90_184	386.82	-142.82	-396.73
Etoposide_AML_90min_r2_8_14_34	386.66	428.46	-1
Etoposide_AML_90min_r2_8_14_34	386.66	428.46	-1
Etoposide_AML_90min_r2_9_79_175	386.48	-142.82	-337.45
Etoposide_AML_90min_r2_9_79_181	386.48	0	-7.56
Etoposide_AML_180min_r2_02_8_19	386.44	-142.82	-234.48
Etoposide_AML_180min_r2_02_8_18	386.44	-142.82	-151.13
Etoposide_AML_180min_5_36_95	386.33	-142.82	-261.26
Etoposide_AML_180min_5_36_80	386.33	-142.82	-291.02
Etoposide_AML_90min_6_79_174	386.04	0	-88.21
Etoposide_AML_90min_6_79_235	386.04	-142.82	-149.98
Etoposide_AML_0min_7_64_174	385.99	-142.82	-1
Etoposide_AML_0min_7_64_132	385.99	-142.82	-353.07
Etoposide_AML_90min_8_68_182	385.98	0	-25.63
Etoposide_AML_90min_8_68_136	385.98	0	-339.51
Etoposide_AML_90min_r2_3_35_90	385.61	-142.82	-221.66
Etoposide_AML_90min_r2_3_35_80	385.61	-142.82	-17.24
Etoposide_AML_180min_r2_06_38_102	385.32	-142.82	-276.02
Etoposide_AML_180min_r2_06_38_72	385.32	-142.82	-100.57
Etoposide_AML_90min_4_59_142	385.25	0	-166.91
Etoposide_AML_90min_4_59_119	385.25	0	-209.71
Etoposide_AML_90min_r2_7_43_96	384.55	-142.82	-210.06
Etoposide_AML_90min_r2_7_43_101	384.55	-142.82	-18.52
Etoposide_AML_0min_r2_1_93_250	384.12	0	-145.69
Etoposide_AML_0min_r2_1_93_202	384.12	0	-77.06
Etoposide_AML_90min_r2_1_15_36	384	-142.82	-243.31
Etoposide_AML_90min_r2_1_15_29	384	-142.82	-23.06
Etoposide_AML_0min_r2_8_36_87	383.84	0	-321.65
Etoposide_AML_0min_r2_8_36_75	383.84	-142.82	-44.32
Etoposide_AML_90min_7_95_292	383.42	0	-1
Etoposide_AML_90min_7_95_194	383.42	0	-1
Etoposide_AML_180min_r2_02_40_95	383.18	-142.82	-296.29
Etoposide_AML_180min_r2_02_40_93	383.18	-142.82	-110.68
Etoposide_AML_180min_4_25_50	382.91	0	-139.81
Etoposide_AML_180min_4_25_52	382.91	-142.82	-389.94
Etoposide_AML_90min_r2_6_8_16	381.87	-142.82	-199.4
Etoposide_AML_90min_r2_6_8_17	381.87	-142.82	-169.86
Etoposide_AML_0min_4_68_172	381.58	0	-1
Etoposide_AML_0min_4_68_147	381.58	0	-1
Etoposide_AML_180min_r2_08_53_137	381.53	-142.82	-261.62
Etoposide_AML_180min_r2_08_53_110	381.53	-142.82	-243.11
Etoposide_AML_180min_5_10_20	380.7	0	-69.56
Etoposide_AML_180min_5_10_23	380.7	-142.82	-117.79
Etoposide_AML_0min_4_86_215	380.25	0	-1
Etoposide_AML_0min_4_86_187	380.25	-142.82	-1
Etoposide_AML_90min_r2_6_74_151	379.74	0	-78.14
Etoposide_AML_90min_r2_6_74_165	379.74	0	-5.34
Etoposide_AML_90min_r2_7_54_121	378.84	-142.82	-119.05
Etoposide_AML_90min_r2_7_54_124	378.84	0	-104.69
Etoposide_AML_90min_1_87_168	378.8	-142.82	-95.99
Etoposide_AML_90min_1_87_221	378.8	-142.82	-241.28
Etoposide_AML_0min_r2_8_84_175	378.75	0	-14.03
Etoposide_AML_0min_r2_8_84_201	378.75	0	-10.62
Etoposide_AML_90min_r2_5_9_21	378.21	0	-301.62
Etoposide_AML_90min_r2_5_9_19	378.21	0	-49.1
Etoposide_AML_0min_r2_5_27_78	377.72	-142.82	-315.31
Etoposide_AML_0min_r2_5_27_53	377.72	-142.82	-39.57
Etoposide_AML_0min_r2_3_20_47	377.31	-142.82	-224.51
Etoposide_AML_0min_r2_3_20_54	377.31	-142.82	-114.15
Etoposide_AML_0min_r2_6_91_189	376.32	-142.82	-157.49
Etoposide_AML_0min_r2_6_91_261	376.32	-142.82	-145.55
Etoposide_AML_90min_r2_6_28_60	376.11	0	-1
Etoposide_AML_90min_r2_6_28_52	376.11	-142.82	-1
Etoposide_AML_0min_r2_6_91_188	376	-142.82	-169.22
Etoposide_AML_0min_r2_6_91_262	376	0	-163.01
Etoposide_AML_0min_r2_1_17_41	375.93	-142.82	-350.66
Etoposide_AML_0min_r2_1_17_46	375.93	-142.82	-137.77
Etoposide_AML_90min_r2_4_19_36	374.44	-142.82	-331.48
Etoposide_AML_90min_r2_4_19_42	374.44	-142.82	-325.21
Etoposide_AML_180min_1_35_81	374.35	-142.82	-52.13
Etoposide_AML_180min_1_35_59	374.35	-142.82	-197.04
Etoposide_AML_180min_1_66_145	374.13	-142.82	-121.47
Etoposide_AML_180min_1_66_108	374.13	-142.82	-268.4
Etoposide_AML_90min_r2_6_17_35	373.65	0	-317.71
Etoposide_AML_90min_r2_6_17_31	373.65	0	-116.34
Etoposide_AML_90min_6_9_28	373.58	0	-18.51
Etoposide_AML_90min_6_9_25	373.58	0	-168.16
Etoposide_AML_90min_r2_1_84_176	373.39	-142.82	-361.53
Etoposide_AML_90min_r2_1_84_213	373.39	-142.82	-92.45
Etoposide_AML_0min_r2_2_57_113	372.98	-142.82	-373
Etoposide_AML_0min_r2_2_57_155	372.98	0	-1
Etoposide_AML_90min_1_69_176	372.94	-142.82	-107.91
Etoposide_AML_90min_1_69_133	372.94	0	-254.57
Etoposide_AML_90min_r2_7_96_207	371.6	0	-86.34
Etoposide_AML_90min_r2_7_96_199	371.6	0	-79.66
Etoposide_AML_90min_r2_5_5_13	371.29	-142.82	-1
Etoposide_AML_90min_r2_5_5_9	371.29	-142.82	-1
Etoposide_AML_0min_r2_7_63_122	370.69	0	-379.23
Etoposide_AML_0min_r2_7_63_191	370.69	0	1
Etoposide_AML_90min_r2_8_11_28	370.58	0	-173.02
Etoposide_AML_90min_r2_8_11_27	370.58	0	1
Etoposide_AML_180min_1_57_92	370.45	428.46	-1
Etoposide_AML_180min_1_57_127	370.45	428.46	-1
Etoposide_AML_180min_r2_09_27_73	370.2	-142.82	-280.78
Etoposide_AML_180min_r2_09_27_58	370.2	0	-128.52
Etoposide_AML_180min_4_19_42	370.18	-142.82	-46.2
Etoposide_AML_180min_4_19_33	370.18	0	-296.55
Etoposide_AML_180min_r2_04_21_67	370.15	0	-43.05
Etoposide_AML_180min_r2_11_21_67	370.15	0	-43.05
Etoposide_AML_180min_r2_11_21_55	370.15	0	-40.63
Etoposide_AML_180min_r2_04_21_55	370.15	0	-40.63
Etoposide_AML_180min_r2_07_82_149	369.87	0	-1
Etoposide_AML_180min_r2_07_82_172	369.87	-142.82	-1
Etoposide_AML_90min_r2_5_72_166	369.5	0	-326.76
Etoposide_AML_90min_r2_5_72_145	369.5	0	-162.63
Etoposide_AML_90min_r2_8_27_63	369.25	-142.82	-213.09
Etoposide_AML_90min_r2_8_27_65	369.25	-142.82	-170.37
Etoposide_AML_90min_r2_6_65_146	368.66	0	-205.44
Etoposide_AML_90min_r2_6_65_132	368.66	0	-154.15
Etoposide_AML_90min_9_57_175	368.54	-142.82	-220.69
Etoposide_AML_90min_9_57_119	368.54	-142.82	-252.7
Etoposide_AML_90min_4_28_72	368.48	-142.82	-176.84
Etoposide_AML_90min_4_28_56	368.48	-142.82	-367.02
Etoposide_AML_90min_r2_7_98_211	368.33	0	-1
Etoposide_AML_90min_r2_7_98_203	368.33	0	-1
Etoposide_AML_0min_r2_1_89_195	368.05	0	-14.07
Etoposide_AML_0min_r2_1_89_243	368.05	0	-1
Etoposide_AML_0min_4_50_128	368.01	-142.82	-154.44
Etoposide_AML_0min_4_50_111	368.01	0	-356.87
Etoposide_AML_0min_6_29_84	367.82	-142.82	-1
Etoposide_AML_0min_6_29_61	367.82	0	-1
Etoposide_AML_90min_r2_9_45_113	367.73	0	-90.25
Etoposide_AML_90min_r2_9_45_113	367.73	-142.82	-85.56
Etoposide_AML_90min_3_94_224	367.47	0	-1
Etoposide_AML_90min_3_94_203	367.47	142.82	-1
Etoposide_AML_90min_1_48_94	367.15	0	-142.21
Etoposide_AML_90min_1_48_123	367.15	0	-308.46
Etoposide_AML_90min_r2_5_23_48	366.68	0	-293.58
Etoposide_AML_90min_r2_5_23_54	366.68	0	-65.98
Etoposide_AML_0min_r2_8_44_91	366.57	0	-345.67
Etoposide_AML_0min_r2_8_44_107	366.57	0	-197.41
Etoposide_AML_90min_2_48_123	366.18	-142.82	-253.59
Etoposide_AML_90min_2_48_98	366.18	-142.82	-289.95
Etoposide_AML_180min_2_35_78	365.97	-142.82	-8.87
Etoposide_AML_180min_2_35_87	365.97	-142.82	-63.78
Etoposide_AML_180min_r2_04_25_63	365.51	-142.82	-244.8
Etoposide_AML_180min_r2_11_25_63	365.51	-142.82	-244.8
Etoposide_AML_180min_r2_04_25_74	365.51	0	-81.2
Etoposide_AML_180min_r2_11_25_74	365.51	0	-81.2
Etoposide_AML_90min_r2_1_79_202	364.68	0	-157.41
Etoposide_AML_90min_r2_1_79_167	364.68	0	1
Etoposide_AML_180min_r2_06_30_59	364.65	0	-289.74
Etoposide_AML_180min_r2_06_30_84	364.65	-142.82	-31.77
Etoposide_AML_90min_r2_8_44_97	364.45	-142.82	-247.62
Etoposide_AML_90min_r2_8_44_99	364.45	0	-95.79
Etoposide_AML_180min_4_41_91	364.21	0	-235.58
Etoposide_AML_180min_4_41_82	364.21	0	-269.31
Etoposide_AML_180min_3_45_70	364.2	0	-1
Etoposide_AML_180min_3_45_116	364.2	0	-378.09
Etoposide_AML_0min_r2_6_89_257	363.95	0	-290.69
Etoposide_AML_0min_r2_6_89_186	363.95	0	-1
Etoposide_AML_180min_4_55_125	363.91	-142.82	-13.65
Etoposide_AML_180min_4_55_115	363.91	-142.82	-344.87
Etoposide_AML_90min_r2_8_67_145	363.83	-142.82	-231.78
Etoposide_AML_90min_r2_8_67_141	363.83	-142.82	-149.66
Etoposide_AML_0min_5_44_112	363.47	-142.82	-197.33
Etoposide_AML_0min_5_44_89	363.47	-142.82	-244.11
Etoposide_AML_180min_r2_03_33_99	363.39	-142.82	-263.59
Etoposide_AML_180min_r2_03_33_75	363.39	0	-23.52
Etoposide_AML_90min_7_63_198	363.3	0	-155
Etoposide_AML_90min_7_63_128	363.3	0	-363.68
Etoposide_AML_0min_5_91_217	363.09	0	-1
Etoposide_AML_0min_5_91_185	363.09	0	-1
Etoposide_AML_90min_3_98_210	362.97	0	-78.69
Etoposide_AML_90min_3_98_231	362.97	0	-283.32
Etoposide_AML_90min_8_88_238	362.64	0	-70.33
Etoposide_AML_90min_8_88_181	362.64	0	-238.19
Etoposide_AML_180min_7_81_247	362.51	428.46	259.36
Etoposide_AML_180min_7_81_170	362.51	0	-200.85
Etoposide_AML_0min_7_56_117	362.38	0	-202.16
Etoposide_AML_0min_7_56_155	362.38	0	-236.3
Etoposide_AML_0min_7_20_62	362	0	-241.7
Etoposide_AML_0min_7_20_46	362	-142.82	-328.12
Etoposide_AML_180min_r2_08_19_40	361.89	0	-198.93
Etoposide_AML_180min_r2_08_19_52	361.89	0	-167.25
Etoposide_AML_0min_3_71_148	361.88	0	1
Etoposide_AML_0min_3_71_214	361.88	-142.82	-162.19
Etoposide_AML_90min_1_91_177	361.81	-142.82	-319.77
Etoposide_AML_90min_1_91_230	361.81	-142.82	-340.16
Etoposide_AML_90min_1_64_124	361.77	-142.82	-44.52
Etoposide_AML_90min_1_64_163	361.77	-142.82	-305.81
Etoposide_AML_90min_7_63_129	361.63	0	1
Etoposide_AML_90min_7_63_197	361.63	0	-142.09
Etoposide_AML_90min_r2_7_49_115	359.58	-142.82	-309.27
Etoposide_AML_90min_r2_7_49_110	359.58	-142.82	-1
Etoposide_AML_0min_r2_8_65_137	359.31	-142.82	-218.29
Etoposide_AML_0min_r2_8_65_160	359.31	0	-71.54
Etoposide_AML_90min_8_5_13	359.1	0	-15.28
Etoposide_AML_90min_8_5_14	359.1	0	-185.76
Etoposide_AML_180min_r2_09_3_7	359.09	-142.82	-184.67
Etoposide_AML_180min_r2_09_3_10	359.09	0	-110.32
Etoposide_AML_90min_r2_7_84_180	358.76	-142.82	-345.23
Etoposide_AML_90min_r2_7_84_186	358.76	-142.82	-16.71
Etoposide_AML_90min_r2_6_76_154	358.59	-142.82	-172.52
Etoposide_AML_90min_r2_6_76_168	358.59	0	-37.26
Etoposide_AML_0min_1_52_182	358.4	0	-291.66
Etoposide_AML_0min_1_52_118	358.4	0	-293.51
Etoposide_AML_0min_r2_5_39_114	358.27	-142.82	-185.41
Etoposide_AML_0min_r2_5_39_78	358.27	0	-107.11
Etoposide_AML_90min_r2_2_56_166	357.66	-142.82	-111.92
Etoposide_AML_90min_r2_2_56_132	357.66	0	1
Etoposide_AML_180min_r2_02_43_89	357.49	0	-199.28
Etoposide_AML_180min_r2_02_43_88	357.49	-142.82	-1
Etoposide_AML_90min_3_87_188	357.42	0	1
Etoposide_AML_90min_3_87_206	357.42	428.46	-1
Etoposide_AML_0min_1_80_181	357.26	-142.82	-4.43
Etoposide_AML_0min_1_80_271	357.26	-142.82	-39.91
Etoposide_AML_90min_r2_7_72_164	357.22	0	-172.62
Etoposide_AML_90min_r2_7_72_158	357.22	0	-1
Etoposide_AML_90min_4_97_226	357.09	0	-1
Etoposide_AML_90min_4_97_193	357.09	0	-1
Etoposide_AML_90min_r2_8_56_124	356.29	0	-253.78
Etoposide_AML_90min_r2_8_56_121	356.29	0	-61.18
Etoposide_AML_90min_r2_6_85_187	354.25	-428.46	-281.38
Etoposide_AML_90min_r2_6_85_173	354.25	0	-63.2
Etoposide_AML_90min_r2_6_58_134	354.18	0	-63.69
Etoposide_AML_90min_r2_6_58_118	354.18	-428.46	-62.11
Etoposide_AML_90min_5_1_2	353.94	0	1
Etoposide_AML_90min_5_1_5	353.94	0	-250.56
Etoposide_AML_90min_5_15_36	353.33	-142.82	-108.98
Etoposide_AML_90min_5_15_30	353.33	-142.82	-218.52
Etoposide_AML_90min_r2_8_21_52	353.21	-142.82	-325.45
Etoposide_AML_90min_r2_8_21_52	353.21	-142.82	-5.45
Etoposide_AML_90min_r2_9_98_218	353.14	0	-352.84
Etoposide_AML_90min_r2_9_98_215	353.14	0	-79.2
Etoposide_AML_0min_6_46_101	353.1	-142.82	-33.44
Etoposide_AML_0min_6_46_133	353.1	0	-248.12
Etoposide_AML_0min_r2_8_74_181	352.79	-142.82	-314.38
Etoposide_AML_0min_r2_8_74_154	352.79	0	1
Etoposide_AML_0min_r2_3_35_96	352.76	0	-304.07
Etoposide_AML_0min_r2_3_35_81	352.76	0	-66.67
Etoposide_AML_90min_r2_9_81_185	352.54	0	-336.09
Etoposide_AML_90min_r2_9_81_178	352.54	0	-155.21
Etoposide_AML_180min_1_12_25	352.45	0	-1
Etoposide_AML_180min_1_12_21	352.45	0	-219.1
Etoposide_AML_90min_r2_7_90_197	352.28	-142.82	-289.34
Etoposide_AML_90min_r2_7_90_191	352.28	0	-263.56
Etoposide_AML_0min_4_35_76	352.19	-142.82	-1
Etoposide_AML_0min_4_35_90	352.19	-142.82	-166.24
Etoposide_AML_90min_1_79_152	352.13	-428.46	1
Etoposide_AML_90min_1_79_201	352.13	0	-13.34
Etoposide_AML_180min_4_78_159	352.12	-142.82	-1.31
Etoposide_AML_180min_4_78_185	352.12	-142.82	-184.52
Etoposide_AML_90min_r2_1_49_127	352.06	0	-1
Etoposide_AML_90min_r2_1_49_101	352.06	0	-1
Etoposide_AML_90min_r2_6_55_127	351.8	0	-339.44
Etoposide_AML_90min_r2_6_55_113	351.8	428.46	427.28
Etoposide_AML_90min_r2_9_43_106	351.11	-142.82	-306.64
Etoposide_AML_90min_r2_9_43_105	351.11	0	-271.37
Etoposide_AML_90min_r2_6_69_155	349.98	-142.82	-230.11
Etoposide_AML_90min_r2_6_69_141	349.98	-142.82	-225.05
Etoposide_AML_90min_7_39_120	349.92	-142.82	-218.63
Etoposide_AML_90min_7_39_81	349.92	-142.82	-369.98
Etoposide_AML_0min_r2_8_82_198	349.85	-142.82	-209.96
Etoposide_AML_0min_r2_8_82_171	349.85	-142.82	-78.81
Etoposide_AML_90min_r2_9_90_200	349.22	0	-268.37
Etoposide_AML_90min_r2_9_90_203	349.22	0	-114.96
Etoposide_AML_180min_r2_02_41_84	348.91	0	-342.7
Etoposide_AML_180min_r2_02_41_87	348.91	0	-38.77
Etoposide_AML_90min_r2_1_47_119	348.77	-142.82	-159.47
Etoposide_AML_90min_r2_1_47_94	348.77	-142.82	-153.76
Etoposide_AML_180min_r2_02_20_46	348.69	0	-259.91
Etoposide_AML_180min_r2_02_20_42	348.69	0	-249.51
Etoposide_AML_0min_5_74_178	348.55	285.64	437.42
Etoposide_AML_0min_5_74_151	348.55	0	-399.08
Etoposide_AML_0min_5_75_152	348.51	-142.82	-25.96
Etoposide_AML_0min_5_75_180	348.51	0	-224.4
Etoposide_AML_0min_r2_3_56_123	348.11	-142.82	-118.26
Etoposide_AML_0min_r2_3_56_154	348.11	-142.82	-50.72
Etoposide_AML_0min_r2_1_74_207	347.68	0	-172.39
Etoposide_AML_0min_r2_1_74_163	347.68	-142.82	-88.14
Etoposide_AML_180min_r2_08_63_127	347.68	0	-66.02
Etoposide_AML_180min_r2_08_63_158	347.68	0	-1
Etoposide_AML_0min_r2_3_4_12	347.22	-142.82	-354.1
Etoposide_AML_0min_r2_3_4_9	347.22	-142.82	-91.83
Etoposide_AML_90min_5_77_177	346.87	0	-1
Etoposide_AML_90min_5_77_150	346.87	0	-1
Etoposide_AML_180min_r2_04_60_134	346.87	-142.82	-303.1
Etoposide_AML_180min_r2_11_60_134	346.87	-142.82	-303.1
Etoposide_AML_180min_r2_11_60_163	346.87	0	-191.35
Etoposide_AML_180min_r2_04_60_163	346.87	0	-191.35
Etoposide_AML_180min_6_52_150	346.85	0	-46.09
Etoposide_AML_180min_6_52_107	346.85	0	-391.79
Etoposide_AML_0min_r2_4_52_119	346.79	-142.82	-137.08
Etoposide_AML_0min_r2_4_52_171	346.79	0	-75.98
Etoposide_AML_90min_r2_3_33_75	346.32	-142.82	-206.99
Etoposide_AML_90min_r2_3_33_87	346.32	-142.82	-86.51
Etoposide_AML_90min_2_26_55	345.88	-142.82	-75.3
Etoposide_AML_90min_2_26_70	345.88	-142.82	-154.33
Etoposide_AML_90min_4_94_187	345.83	-142.82	-1
Etoposide_AML_90min_4_94_219	345.83	-142.82	-195.87
Etoposide_AML_90min_r2_8_64_139	345.78	0	-163.23
Etoposide_AML_90min_r2_8_64_136	345.78	0	-64.58
Etoposide_AML_90min_r2_7_65_146	345.62	0	-94.65
Etoposide_AML_90min_r2_7_65_150	345.62	0	-29.76
Etoposide_AML_90min_r2_8_29_68	345.36	-142.82	-1
Etoposide_AML_90min_r2_8_29_70	345.36	-142.82	-1
Etoposide_AML_0min_r2_8_65_159	345.25	-142.82	-321.19
Etoposide_AML_0min_r2_8_65_136	345.25	0	-167.87
Etoposide_AML_180min_r2_02_43_90	345.18	-142.82	-1
Etoposide_AML_180min_r2_02_43_89	345.18	-142.82	-1
Etoposide_AML_90min_r2_6_61_125	345.08	0	-263.37
Etoposide_AML_90min_r2_6_61_139	345.08	0	-227.64
Etoposide_AML_90min_r2_3_9_18	344.79	-142.82	-200.33
Etoposide_AML_90min_r2_3_9_20	344.79	-142.82	-1
Etoposide_AML_180min_1_28_48	344.74	-285.64	1
Etoposide_AML_180min_1_28_64	344.74	-428.46	-168.63
Etoposide_AML_90min_r2_9_74_172	344.73	0	-300.18
Etoposide_AML_90min_r2_9_74_163	344.73	-142.82	-226.67
Etoposide_AML_90min_4_46_114	344.48	0	-284.32
Etoposide_AML_90min_4_46_93	344.48	0	-336.91
Etoposide_AML_0min_5_30_77	344.31	-142.82	-14.3
Etoposide_AML_0min_5_30_60	344.31	-142.82	-156.72
Etoposide_AML_90min_r2_7_74_165	344.1	-142.82	-295.04
Etoposide_AML_90min_r2_7_74_161	344.1	-142.82	-131.26
Etoposide_AML_90min_8_65_130	343.9	-142.82	-0.92
Etoposide_AML_90min_8_65_175	343.9	0	-172.99
Etoposide_AML_180min_r2_02_12_24	343.24	-142.82	-238.53
Etoposide_AML_180min_r2_02_12_25	343.24	0	-90.54
Etoposide_AML_180min_7_46_103	343.2	0	-112.31
Etoposide_AML_180min_7_46_159	343.2	-142.82	-163.38
Etoposide_AML_180min_1_56_124	343.11	0	-18.45
Etoposide_AML_180min_1_56_90	343.11	0	-123.9
Etoposide_AML_0min_4_22_45	342.84	-142.82	-1
Etoposide_AML_0min_4_22_56	342.84	0	-251.65
Etoposide_AML_180min_r2_09_59_122	342.72	0	-191.1
Etoposide_AML_180min_r2_09_59_153	342.72	0	-17.22
Etoposide_AML_90min_5_11_27	342.68	0	-1
Etoposide_AML_90min_5_11_20	342.68	-142.82	-187.17
Etoposide_AML_90min_5_33_64	342.67	0	-80.45
Etoposide_AML_90min_5_33_75	342.67	0	-155.31
Etoposide_AML_0min_5_78_185	342.64	-142.82	-217.8
Etoposide_AML_0min_5_78_159	342.64	-142.82	-351.41
Etoposide_AML_0min_r2_8_22_43	342.64	0	-145.09
Etoposide_AML_0min_r2_8_22_54	342.64	0	-24.81
Etoposide_AML_180min_2_16_33	342.44	0	-3.86
Etoposide_AML_180min_2_16_35	342.44	0	-278.03
Etoposide_AML_0min_2_51_168	342.43	0	-57.66
Etoposide_AML_0min_2_51_99	342.43	-142.82	-182.92
Etoposide_AML_90min_5_32_61	342.2	0	-229.12
Etoposide_AML_90min_5_32_73	342.2	0	-316.74
Etoposide_AML_90min_4_84_169	342.17	428.46	234.79
Etoposide_AML_90min_4_84_200	342.17	428.46	45.31
Etoposide_AML_0min_r2_3_96_209	342.03	-142.82	-289.68
Etoposide_AML_0min_r2_3_96_266	342.03	-142.82	-197.1
Etoposide_AML_0min_1_80_180	341.86	0	-16.62
Etoposide_AML_0min_1_80_272	341.86	0	-240.59
Etoposide_AML_180min_r2_07_24_64	341.73	-142.82	-258.89
Etoposide_AML_180min_r2_07_24_53	341.73	-142.82	-1
Etoposide_AML_180min_6_70_201	341.66	-142.82	-1
Etoposide_AML_180min_6_70_146	341.66	-142.82	-369.5
Etoposide_AML_90min_5_32_62	341.07	0	-75.79
Etoposide_AML_90min_5_32_74	341.07	-142.82	-309.65
Etoposide_AML_0min_r2_8_92_216	341.06	0	-269.16
Etoposide_AML_0min_r2_8_92_189	341.06	0	-161.94
Etoposide_AML_180min_r2_10_44_133	340.7	0	-287.32
Etoposide_AML_180min_r2_10_44_93	340.7	0	-59.54
Etoposide_AML_90min_4_35_92	340.61	-142.82	-1.41
Etoposide_AML_90min_4_35_73	340.61	-142.82	-132.72
Etoposide_AML_180min_1_1_1	339.74	0	-271.85
Etoposide_AML_180min_1_1_0	339.74	0	-286.31
Etoposide_AML_90min_3_68_166	339.62	-428.46	358.64
Etoposide_AML_90min_3_68_151	339.62	0	-332.53
Etoposide_AML_90min_3_79_189	339.11	0	-1
Etoposide_AML_90min_3_79_172	339.11	0	-1
Etoposide_AML_180min_1_23_40	339.05	0	-21.95
Etoposide_AML_180min_1_23_51	339.05	-142.82	-303.41
Etoposide_AML_90min_r2_3_36_93	338.28	-428.46	-288.09
Etoposide_AML_90min_r2_4_63_144	338.28	-142.82	-244.67
Etoposide_AML_90min_r2_3_36_82	338.28	0	-132.33
Etoposide_AML_90min_r2_4_63_138	338.28	0	1
Etoposide_AML_0min_r2_7_0_0	338.08	-142.82	-321.11
Etoposide_AML_0min_r2_7_0_1	338.08	-142.82	-62.21
Etoposide_AML_0min_r2_6_67_197	338.07	0	-391.82
Etoposide_AML_0min_r2_6_67_139	338.07	0	-210.69
Etoposide_AML_90min_r2_6_48_109	338.01	-142.82	-1
Etoposide_AML_90min_r2_6_48_96	338.01	-142.82	-1
Etoposide_AML_180min_5_98_252	338	0	-1
Etoposide_AML_180min_5_98_209	338	0	-1
Etoposide_AML_0min_r2_5_83_244	338	-142.82	-227.93
Etoposide_AML_0min_r2_5_83_168	338	-142.82	-33.26
Etoposide_AML_90min_4_57_138	337.82	-142.82	-62.73
Etoposide_AML_90min_4_57_115	337.82	0	-202.27
Etoposide_AML_0min_3_54_169	337.54	-142.82	-12
Etoposide_AML_0min_3_54_112	337.54	-142.82	-305.31
Etoposide_AML_0min_6_26_77	337.1	0	-77.76
Etoposide_AML_0min_6_26_55	337.1	-142.82	-106.14
Etoposide_AML_0min_r2_3_42_118	336.57	0	-360.31
Etoposide_AML_0min_r2_3_42_95	336.57	0	-212.25
Etoposide_AML_0min_6_9_25	336.33	0	-225.88
Etoposide_AML_0min_6_9_21	336.33	0	-276.28
Etoposide_AML_90min_r2_1_52_133	336.3	-142.82	-172.25
Etoposide_AML_90min_r2_1_52_105	336.3	-142.82	-74.11
Etoposide_AML_90min_r2_3_12_23	335.78	-142.82	-246.59
Etoposide_AML_90min_r2_3_12_26	335.78	0	-154.87
Etoposide_AML_0min_r2_4_44_146	335.64	-142.82	-219.4
Etoposide_AML_0min_r2_4_44_101	335.64	-142.82	-64.57
Etoposide_AML_180min_r2_10_4_13	335.54	-142.82	-158.93
Etoposide_AML_180min_r2_10_4_12	335.54	-142.82	-1
Etoposide_AML_90min_r2_6_90_197	335.49	-142.82	-264.97
Etoposide_AML_90min_r2_6_90_182	335.49	-142.82	-239.96
Etoposide_AML_90min_2_66_133	335.46	0	-2.92
Etoposide_AML_90min_2_66_169	335.46	-428.46	-180.15
Etoposide_AML_180min_6_82_231	335.43	-142.82	-241.11
Etoposide_AML_180min_6_82_172	335.43	-142.82	-248.01
Etoposide_AML_90min_3_5_12	335.02	0	-5.37
Etoposide_AML_90min_3_5_10	335.02	0	-277.1
Etoposide_AML_180min_r2_09_43_115	334.9	0	-263.1
Etoposide_AML_180min_r2_09_43_89	334.9	0	-220.15
Etoposide_AML_180min_r2_10_1_3	334.85	-142.82	-217.12
Etoposide_AML_180min_r2_10_1_3	334.85	-142.82	-30.64
Etoposide_AML_90min_r2_1_46_117	334.62	0	-351.67
Etoposide_AML_90min_r2_1_46_92	334.62	0	-178.74
Etoposide_AML_0min_r2_2_72_145	334.36	-142.82	-339
Etoposide_AML_0min_r2_2_72_195	334.36	-142.82	-204.36
Etoposide_AML_180min_r2_10_67_141	334.29	0	-362.95
Etoposide_AML_180min_r2_10_67_192	334.29	0	-148.33
Etoposide_AML_180min_4_86_175	334.28	0	1
Etoposide_AML_180min_4_86_200	334.28	428.46	-1
Etoposide_AML_90min_r2_2_25_80	333.9	-142.82	-259.72
Etoposide_AML_90min_r2_2_25_67	333.9	-142.82	-22.56
Etoposide_AML_180min_r2_09_49_129	333.75	-142.82	-347.98
Etoposide_AML_180min_r2_09_49_100	333.75	-142.82	-31.31
Etoposide_AML_90min_r2_3_48_107	333.41	-142.82	-346.16
Etoposide_AML_90min_r2_3_48_123	333.41	-142.82	-188.51
Etoposide_AML_90min_9_96_285	333.14	-428.46	-119.82
Etoposide_AML_90min_9_96_196	333.14	0	-195.02
Etoposide_AML_90min_4_10_18	332.78	-142.82	-131.64
Etoposide_AML_90min_4_10_26	332.78	0	-196.52
Etoposide_AML_180min_r2_02_26_57	332.52	-142.82	-250.8
Etoposide_AML_180min_r2_02_26_53	332.52	0	-23.01
Etoposide_AML_90min_r2_5_57_117	332.24	-142.82	-216.18
Etoposide_AML_90min_r2_5_57_135	332.24	-142.82	-27.94
Etoposide_AML_180min_r2_09_50_131	332.19	-142.82	-60.08
Etoposide_AML_180min_r2_09_50_103	332.19	-142.82	-20.9
Etoposide_AML_0min_5_75_179	331.38	0	-16.15
Etoposide_AML_0min_5_75_153	331.38	-428.46	-302.67
Etoposide_AML_90min_r2_8_91_195	331.2	0	-266.8
Etoposide_AML_90min_r2_8_91_195	331.2	0	-97.89
Etoposide_AML_0min_2_89_173	331.16	-142.82	-75.31
Etoposide_AML_0min_2_89_282	331.16	-142.82	-236.75
Etoposide_AML_180min_5_6_12	330.66	0	-32.3
Etoposide_AML_180min_5_6_14	330.66	0	-192.57
Etoposide_AML_90min_r2_4_69_148	330.43	0	-309.27
Etoposide_AML_90min_r2_4_69_154	330.43	0	-84.04
Etoposide_AML_90min_3_20_51	330.19	-285.64	-125.91
Etoposide_AML_90min_3_20_44	330.19	0	-303.26
Etoposide_AML_90min_9_44_135	330.14	-142.82	-77.39
Etoposide_AML_90min_9_44_90	330.14	-142.82	-171.63
Etoposide_AML_90min_r2_2_78_183	330.08	0	-242.38
Etoposide_AML_90min_r2_2_78_221	330.08	-142.82	-83.01
Etoposide_AML_90min_r2_2_28_89	330.03	-142.82	-274.72
Etoposide_AML_90min_r2_2_28_75	330.03	-142.82	-53.5
Etoposide_AML_90min_1_79_153	329.84	-142.82	-143.2
Etoposide_AML_90min_1_79_202	329.84	-142.82	-265.23
Etoposide_AML_90min_r2_8_90_193	329.08	0	-195.36
Etoposide_AML_90min_r2_8_90_193	329.08	-142.82	-102.75
Etoposide_AML_0min_r2_5_83_243	328.82	-142.82	-311.54
Etoposide_AML_0min_r2_5_83_169	328.82	-142.82	-147.75
Etoposide_AML_180min_r2_06_72_142	328.81	0	-1
Etoposide_AML_180min_r2_06_72_185	328.81	-142.82	-1
Etoposide_AML_180min_r2_08_25_67	328.39	-142.82	-241.99
Etoposide_AML_180min_r2_08_25_51	328.39	0	-180.55
Etoposide_AML_90min_r2_3_89_202	328.12	0	-360.15
Etoposide_AML_90min_r2_3_89_227	328.12	0	-269.63
Etoposide_AML_180min_r2_09_32_86	328.11	0	-1
Etoposide_AML_180min_r2_09_32_68	328.11	0	-1
Etoposide_AML_90min_4_23_46	328.07	0	-71.15
Etoposide_AML_90min_4_23_58	328.07	-142.82	-223.54
Etoposide_AML_90min_4_55_111	327.89	0	-156.64
Etoposide_AML_90min_4_55_135	327.89	-428.46	-269.57
Etoposide_AML_180min_3_31_84	327.42	0	-55.38
Etoposide_AML_180min_3_31_52	327.42	0	-224.07
Etoposide_AML_180min_r2_06_7_16	327.38	0	1
Etoposide_AML_180min_r2_06_7_23	327.38	-285.64	1
Etoposide_AML_90min_r2_6_56_130	327.04	-142.82	-173.82
Etoposide_AML_90min_r2_6_56_114	327.04	0	-103.1
Etoposide_AML_180min_r2_10_4_11	326.95	0	-356.37
Etoposide_AML_180min_r2_10_4_14	326.95	0	-125.26
Etoposide_AML_90min_r2_4_90_192	326.86	-142.82	-334.48
Etoposide_AML_90min_r2_4_90_197	326.86	-142.82	-90.92
Etoposide_AML_180min_r2_09_5_13	326.81	0	-338.47
Etoposide_AML_180min_r2_09_5_11	326.81	0	-327.8
Etoposide_AML_90min_3_70_155	326.61	-142.82	-70.71
Etoposide_AML_90min_3_70_171	326.61	-142.82	-116.51
Etoposide_AML_180min_1_62_99	326.57	0	1
Etoposide_AML_180min_1_62_136	326.57	-142.82	-1
Etoposide_AML_0min_5_81_192	326.36	0	-249.8
Etoposide_AML_0min_5_81_166	326.36	0	-281.96
Etoposide_AML_90min_9_59_178	326.25	0	-1
Etoposide_AML_90min_9_59_123	326.25	0	-1
Etoposide_AML_0min_r2_1_82_223	326.2	0	-272.34
Etoposide_AML_0min_r2_1_82_179	326.2	-142.82	-52.72
Etoposide_AML_90min_r2_3_84_216	325.92	-142.82	-335.65
Etoposide_AML_90min_r2_3_84_191	325.92	0	-329.49
Etoposide_AML_90min_r2_5_17_37	325.8	-142.82	-133.77
Etoposide_AML_90min_r2_5_17_41	325.8	0	1
Etoposide_AML_180min_r2_10_53_112	325.13	0	-310.63
Etoposide_AML_180min_r2_10_53_157	325.13	0	-2.77
Etoposide_AML_90min_r2_8_60_129	325.12	428.46	35.76
Etoposide_AML_90min_r2_8_60_132	325.12	428.46	426.87
Etoposide_AML_180min_5_6_13	324.71	0	-29.53
Etoposide_AML_180min_5_6_11	324.71	-142.82	-221.99
Etoposide_AML_0min_5_46_93	324.69	0	55.63
Etoposide_AML_0min_5_46_117	324.69	0	-42.28
Etoposide_AML_90min_4_38_79	324.69	0	-137.59
Etoposide_AML_90min_4_38_99	324.69	0	-181.19
Etoposide_AML_90min_5_70_159	324.64	0	-56.73
Etoposide_AML_90min_5_70_135	324.64	-428.46	-332.09
Etoposide_AML_0min_4_52_116	324.61	-142.82	-1
Etoposide_AML_0min_4_52_133	324.61	-142.82	-120.99
Etoposide_AML_180min_6_63_132	324.5	0	1
Etoposide_AML_180min_6_63_183	324.5	-142.82	-341.64
Etoposide_AML_0min_1_88_197	324.42	0	-4.14
Etoposide_AML_0min_1_88_291	324.42	-142.82	-79.58
Etoposide_AML_90min_7_39_80	324.19	-142.82	-5.33
Etoposide_AML_90min_7_39_121	324.19	-142.82	-103.8
Etoposide_AML_0min_r2_5_46_95	324.07	0	-161.16
Etoposide_AML_0min_r2_5_46_134	324.07	-142.82	-151.76
Etoposide_AML_90min_r2_5_71_164	323.52	0	-257.46
Etoposide_AML_90min_r2_5_71_142	323.52	0	-188.89
Etoposide_AML_0min_5_89_212	323.34	0	-301.85
Etoposide_AML_0min_5_89_180	323.34	-142.82	-352.33
Etoposide_AML_180min_2_47_113	323.34	-142.82	-359.28
Etoposide_AML_180min_2_47_99	323.34	0	-367.05
Etoposide_AML_180min_6_31_67	322.98	-142.82	-10.99
Etoposide_AML_180min_6_31_92	322.98	0	-229.07
Etoposide_AML_180min_r2_05_44_114	322.8	-142.82	-1
Etoposide_AML_180min_r2_05_44_88	322.8	-142.82	-1
Etoposide_AML_0min_7_77_158	322.56	0	-176.04
Etoposide_AML_0min_7_77_206	322.56	-142.82	-312.77
Etoposide_AML_0min_r2_3_28_69	322.53	0	-55.47
Etoposide_AML_0min_r2_3_28_82	322.53	-142.82	-1
Etoposide_AML_90min_r2_3_84_215	322.36	-142.82	-1
Etoposide_AML_90min_r2_3_84_192	322.36	-142.82	-1
Etoposide_AML_90min_r2_3_70_180	321.8	0	1
Etoposide_AML_90min_r2_3_70_159	321.8	0	1
Etoposide_AML_90min_4_78_188	321.72	-428.46	-1
Etoposide_AML_90min_4_78_158	321.72	-428.46	-262.8
Etoposide_AML_180min_r2_07_49_126	321.68	0	1
Etoposide_AML_180min_r2_07_49_105	321.68	0	1
Etoposide_AML_90min_r2_4_73_156	321.38	-142.82	-236.37
Etoposide_AML_90min_r2_4_73_161	321.38	0	-16.03
Etoposide_AML_180min_3_31_85	321.21	-142.82	-35.03
Etoposide_AML_180min_3_31_51	321.21	-142.82	-309.2
Etoposide_AML_90min_3_79_173	321.07	0	-18.98
Etoposide_AML_90min_3_79_190	321.07	0	-223.95
Etoposide_AML_0min_r2_2_25_74	321.07	0	-193.03
Etoposide_AML_0min_r2_2_25_51	321.07	0	-37.39
Etoposide_AML_0min_r2_6_93_266	320.79	0	-1
Etoposide_AML_0min_r2_6_93_191	320.79	0	-1
Etoposide_AML_90min_1_25_48	320.39	-142.82	-10.4
Etoposide_AML_90min_1_25_59	320.39	-142.82	-27.57
Etoposide_AML_0min_r2_8_71_175	320.01	-142.82	-6.86
Etoposide_AML_0min_r2_8_71_148	320.01	-142.82	-4.42
Etoposide_AML_180min_r2_09_38_103	319.98	0	-198.46
Etoposide_AML_180min_r2_09_38_79	319.98	0	-123.03
Etoposide_AML_90min_1_84_161	319.38	-142.82	-252.09
Etoposide_AML_90min_1_84_213	319.38	0	-324.62
Etoposide_AML_0min_3_37_75	318.99	0	-57.2
Etoposide_AML_0min_3_37_120	318.99	-285.64	-390.05
Etoposide_AML_90min_3_43_98	318.86	0	-104.95
Etoposide_AML_90min_3_43_109	318.86	0	-199.78
Etoposide_AML_90min_r2_3_91_233	318.82	0	-261.42
Etoposide_AML_90min_r2_3_91_205	318.82	0	-31.45
Etoposide_AML_0min_7_90_236	318.56	-142.82	-116.47
Etoposide_AML_0min_7_90_188	318.56	-142.82	-202.06
Etoposide_AML_0min_7_75_200	318.43	-142.82	-1
Etoposide_AML_0min_7_75_153	318.43	-142.82	-1
Etoposide_AML_0min_2_14_26	318.23	-142.82	-1
Etoposide_AML_90min_3_3_9	318.23	0	-67.31
Etoposide_AML_90min_3_3_8	318.23	0	-229.13
Etoposide_AML_0min_2_14_53	318.23	-142.82	-320.03
Etoposide_AML_0min_4_72_182	318.05	-142.82	-133.93
Etoposide_AML_0min_4_72_159	318.05	-142.82	-322.15
Etoposide_AML_90min_r2_5_5_12	318.04	0	-1
Etoposide_AML_90min_r2_5_5_10	318.04	0	-1
Etoposide_AML_0min_r2_2_83_164	317.89	0	-61.1
Etoposide_AML_0min_r2_2_83_219	317.89	-142.82	-51.02
Etoposide_AML_90min_r2_9_97_215	317.87	0	-221.11
Etoposide_AML_90min_r2_9_97_213	317.87	-428.46	1
Etoposide_AML_180min_2_21_47	317.81	-142.82	-4.73
Etoposide_AML_180min_2_21_44	317.81	-142.82	-71.03
Etoposide_AML_90min_r2_6_9_18	317.66	-142.82	-284.39
Etoposide_AML_90min_r2_6_9_20	317.66	0	-3.35
Etoposide_AML_90min_4_94_188	317.38	0	-48.52
Etoposide_AML_90min_4_94_220	317.38	0	-243.44
Etoposide_AML_180min_5_81_211	317.04	-142.82	-1
Etoposide_AML_180min_5_81_172	317.04	-142.82	-158.76
Etoposide_AML_0min_5_83_197	317.03	-142.82	-262.4
Etoposide_AML_0min_5_83_169	317.03	-142.82	-306.72
Etoposide_AML_0min_r2_8_38_93	316.88	-142.82	-296.72
Etoposide_AML_0min_r2_8_38_80	316.88	-142.82	-267.29
Etoposide_AML_90min_r2_8_55_121	316.82	-142.82	-322.44
Etoposide_AML_90min_r2_8_55_119	316.82	-142.82	-263.42
Etoposide_AML_90min_r2_9_57_135	316.81	-142.82	-323.96
Etoposide_AML_90min_r2_9_57_136	316.81	-142.82	-133.3
Etoposide_AML_90min_r2_7_51_120	316.8	0	-254.43
Etoposide_AML_90min_r2_7_51_115	316.8	-428.46	-195.77
Etoposide_AML_90min_r2_7_90_190	316.6	-142.82	-103.96
Etoposide_AML_90min_r2_7_90_196	316.6	285.64	346.49
Etoposide_AML_0min_r2_4_55_178	316.57	-142.82	-227.76
Etoposide_AML_0min_r2_4_55_126	316.57	-142.82	-167.93
Etoposide_AML_90min_4_8_21	316.13	-142.82	-116.2
Etoposide_AML_90min_4_8_14	316.13	-142.82	-338.61
Etoposide_AML_90min_r2_3_72_184	315.99	-142.82	-205.27
Etoposide_AML_90min_r2_3_72_164	315.99	-142.82	-118.21
Etoposide_AML_0min_2_28_91	315.97	-428.46	1
Etoposide_AML_0min_2_28_52	315.97	0	-1
Etoposide_AML_90min_r2_6_89_180	315.94	0	-1
Etoposide_AML_90min_r2_6_89_195	315.94	-142.82	-1
Etoposide_AML_90min_r2_8_77_162	315.91	0	-226.82
Etoposide_AML_90min_r2_8_77_163	315.91	0	-45.76
Etoposide_AML_180min_2_66_157	315.82	0	-46.87
Etoposide_AML_180min_2_66_129	315.82	0	-268.79
Etoposide_AML_90min_8_61_165	315.81	-142.82	-227.94
Etoposide_AML_90min_8_61_122	315.81	-142.82	-323.27
Etoposide_AML_90min_r2_9_42_102	315.36	-142.82	-323.95
Etoposide_AML_90min_r2_9_42_104	315.36	-142.82	-135.83
Etoposide_AML_180min_r2_10_65_189	315.26	-142.82	-141.34
Etoposide_AML_180min_r2_10_65_137	315.26	-142.82	-50.49
Etoposide_AML_180min_4_54_122	315.23	-142.82	-226.68
Etoposide_AML_180min_4_54_112	315.23	-142.82	-319.87
Etoposide_AML_0min_r2_8_78_203	315.18	-142.82	-203.94
Etoposide_AML_0min_r2_8_78_231	315.18	0	-20.56
Etoposide_AML_90min_5_58_133	315.17	-142.82	-176.34
Etoposide_AML_90min_5_58_113	315.17	0	-299.13
Etoposide_AML_90min_5_61_119	315.16	-142.82	-81.12
Etoposide_AML_90min_5_61_142	315.16	-142.82	-92.8
Etoposide_AML_90min_r2_6_74_150	314.56	0	-295.18
Etoposide_AML_90min_r2_6_74_166	314.56	0	-280.61
Etoposide_AML_90min_3_46_114	314.43	0	-325.41
Etoposide_AML_90min_3_46_104	314.43	-142.82	-347.45
Etoposide_AML_0min_3_81_168	314.3	-142.82	-222.71
Etoposide_AML_0min_3_81_238	314.3	-142.82	-282.88
Etoposide_AML_180min_r2_10_1_4	314.24	0	-125.51
Etoposide_AML_180min_r2_10_1_4	314.24	-285.64	-84.73
Etoposide_AML_90min_4_64_153	314.17	-142.82	-30.17
Etoposide_AML_90min_4_64_130	314.17	0	-183.95
Etoposide_AML_0min_r2_3_18_44	314.05	-142.82	-306.54
Etoposide_AML_0min_r2_3_18_50	314.05	-142.82	-71.02
Etoposide_AML_90min_3_21_52	314	-142.82	-280.25
Etoposide_AML_90min_3_21_45	314	-142.82	-360.07
Etoposide_AML_180min_6_9_19	313.96	-142.82	-215.17
Etoposide_AML_180min_6_9_28	313.96	-142.82	-304.72
Etoposide_AML_90min_r2_5_98_220	313.79	0	-327.2
Etoposide_AML_90min_r2_8_72_153	313.79	0	-319.33
Etoposide_AML_90min_r2_5_98_195	313.79	0	-287.81
Etoposide_AML_90min_r2_8_72_154	313.79	0	-212.87
Etoposide_AML_90min_2_47_122	313.24	0	-4.33
Etoposide_AML_90min_2_47_96	313.24	0	-280.47
Etoposide_AML_90min_3_59_148	313.11	0	-100.62
Etoposide_AML_90min_3_59_133	313.11	0	-231.34
Etoposide_AML_90min_r2_3_41_96	313.08	0	-353.73
Etoposide_AML_90min_r2_3_41_108	313.08	0	-233.13
Etoposide_AML_90min_r2_9_78_180	313.03	-142.82	-338.74
Etoposide_AML_90min_r2_9_78_173	313.03	-142.82	-125.69
Etoposide_AML_0min_r2_1_81_220	312.95	0	-301.2
Etoposide_AML_0min_r2_1_81_178	312.95	0	-290.84
Etoposide_AML_180min_r2_04_59_131	312.94	0	-320.77
Etoposide_AML_180min_r2_11_59_131	312.94	0	-320.77
Etoposide_AML_180min_r2_11_59_161	312.94	0	-299.77
Etoposide_AML_180min_r2_04_59_161	312.94	0	-299.77
Etoposide_AML_90min_r2_3_54_141	312.93	0	-138.66
Etoposide_AML_90min_r2_3_54_124	312.93	0	25.06
Etoposide_AML_0min_r2_2_25_52	312.9	-142.82	-335.62
Etoposide_AML_0min_r2_2_25_73	312.9	-142.82	-278.78
Etoposide_AML_0min_r2_7_97_190	312.74	-142.82	-342.38
Etoposide_AML_0min_r2_7_97_278	312.74	-142.82	-151.46
Etoposide_AML_90min_3_45_113	312.57	0	-235.78
Etoposide_AML_90min_3_45_101	312.57	0	-331.48
Etoposide_AML_90min_4_49_98	312.47	-142.82	-4.79
Etoposide_AML_90min_4_49_120	312.47	-142.82	-69.08
Etoposide_AML_90min_r2_4_90_198	312.44	-142.82	-1
Etoposide_AML_90min_r2_4_90_193	312.44	-142.82	-1
Etoposide_AML_180min_r2_06_22_44	312.18	0	-310.95
Etoposide_AML_180min_r2_05_57_148	312.18	0	-211.7
Etoposide_AML_180min_r2_05_57_114	312.18	0	-3.88
Etoposide_AML_180min_r2_06_22_61	312.18	0	-1
Etoposide_AML_0min_r2_7_90_259	312.04	-142.82	-195.91
Etoposide_AML_0min_r2_5_97_285	312.04	0	-138.84
Etoposide_AML_0min_r2_5_97_197	312.04	-285.64	-31.34
Etoposide_AML_0min_r2_7_90_174	312.04	-142.82	-25.15
Etoposide_AML_90min_5_33_63	311.63	-142.82	-146.4
Etoposide_AML_90min_5_33_76	311.63	-142.82	-276.24
Etoposide_AML_90min_5_2_4	311.3	-142.82	-98.71
Etoposide_AML_90min_5_2_7	311.3	-142.82	-314.71
Etoposide_AML_180min_r2_06_74_145	310.74	0	-118.07
Etoposide_AML_180min_r2_06_74_191	310.74	-142.82	-67.4
Etoposide_AML_0min_r2_3_4_13	310.53	-142.82	-241.59
Etoposide_AML_0min_r2_3_4_10	310.53	-142.82	-13.1
Etoposide_AML_0min_r2_8_35_86	310.47	-142.82	-260.86
Etoposide_AML_0min_r2_8_35_73	310.47	-142.82	-42.29
Etoposide_AML_180min_4_40_80	310.34	0	1
Etoposide_AML_180min_4_40_89	310.34	0	-279.78
Etoposide_AML_180min_2_4_8	310.32	-142.82	-1
Etoposide_AML_180min_2_4_8	310.32	-142.82	-369.48
Etoposide_AML_0min_6_51_147	310.24	-142.82	-1
Etoposide_AML_0min_6_51_110	310.24	-142.82	-1
Etoposide_AML_180min_3_52_130	310.18	0	-94.42
Etoposide_AML_180min_3_52_81	310.18	0	-124.45
Etoposide_AML_90min_3_98_232	310	-428.46	-227.31
Etoposide_AML_90min_3_98_209	310	-428.46	-258.01
Etoposide_AML_90min_r2_5_18_39	309.9	0	-238.87
Etoposide_AML_90min_r2_5_18_44	309.9	0	-12.49
Etoposide_AML_180min_5_46_123	309.86	-142.82	-334.08
Etoposide_AML_180min_5_46_102	309.86	-142.82	-362.49
Etoposide_AML_90min_8_56_155	309.79	-142.82	-16
Etoposide_AML_90min_8_56_115	309.79	-142.82	-242.44
Etoposide_AML_90min_r2_6_12_25	309.54	0	-208.02
Etoposide_AML_90min_r2_6_12_22	309.54	0	-39.68
Etoposide_AML_0min_r2_1_42_117	309.51	-142.82	-373.99
Etoposide_AML_0min_r2_1_42_96	309.51	-142.82	-270.47
Etoposide_AML_0min_4_41_105	308.78	-142.82	-381.4
Etoposide_AML_0min_4_41_91	308.78	-142.82	-385.71
Etoposide_AML_90min_8_68_183	308.52	-142.82	-19.79
Etoposide_AML_90min_8_68_135	308.52	-142.82	-92.41
Etoposide_AML_180min_4_54_113	308.15	-142.82	-111.28
Etoposide_AML_180min_4_54_123	308.15	0	-148.53
Etoposide_AML_90min_r2_5_24_50	307.92	-142.82	-299.52
Etoposide_AML_90min_r2_5_24_56	307.92	0	-217.72
Etoposide_AML_0min_5_94_189	307.65	0	-63.3
Etoposide_AML_0min_5_94_221	307.65	0	-156.45
Etoposide_AML_180min_r2_07_6_17	307.6	0	-1
Etoposide_AML_180min_r2_07_6_16	307.6	0	-1
Etoposide_AML_180min_3_54_85	307.37	-142.82	-69.7
Etoposide_AML_180min_3_54_135	307.37	-142.82	-214.27
Etoposide_AML_0min_r2_1_51_116	307.23	-142.82	-299.35
Etoposide_AML_0min_r2_1_51_140	307.23	-142.82	-179.82
Etoposide_AML_90min_r2_8_16_37	307.19	-142.82	-262.24
Etoposide_AML_90min_r2_8_16_38	307.19	0	-7.31
Etoposide_AML_180min_7_81_246	306.79	0	-1
Etoposide_AML_180min_7_81_169	306.79	0	-1
Etoposide_AML_90min_r2_5_77_176	306.73	0	-217.78
Etoposide_AML_90min_r2_5_77_155	306.73	0	-138.08
Etoposide_AML_90min_7_90_183	306.61	-142.82	-198.65
Etoposide_AML_90min_7_90_279	306.61	-142.82	-333.41
Etoposide_AML_0min_3_43_89	306.55	-142.82	-143.59
Etoposide_AML_0min_3_43_137	306.55	0	-147.79
Etoposide_AML_0min_5_14_33	305.83	0	-1
Etoposide_AML_0min_5_14_25	305.83	0	-1
Etoposide_AML_180min_4_80_188	305.79	0	-1
Etoposide_AML_180min_4_80_164	305.79	0	-1
Etoposide_AML_180min_r2_02_30_66	305.74	428.46	0
Etoposide_AML_180min_r2_02_30_62	305.74	428.46	264.45
Etoposide_AML_0min_6_32_91	305.4	-142.82	-232.45
Etoposide_AML_0min_6_32_68	305.4	-142.82	-267.65
Etoposide_AML_90min_2_88_175	304.42	0	-56.29
Etoposide_AML_90min_2_88_222	304.42	-428.46	-119.51
Etoposide_AML_0min_r2_1_51_115	304.31	0	-1
Etoposide_AML_0min_r2_1_51_139	304.31	0	1
Etoposide_AML_180min_7_62_195	304.09	-142.82	-1
Etoposide_AML_180min_7_62_132	304.09	-142.82	-1
Etoposide_AML_90min_r2_9_54_129	304.08	0	-349.28
Etoposide_AML_90min_r2_9_54_129	304.08	0	-338.81
Etoposide_AML_180min_r2_07_60_127	303.88	0	-322.49
Etoposide_AML_180min_r2_07_60_151	303.88	0	-170.96
Etoposide_AML_180min_r2_08_49_101	303.79	-142.82	-205.34
Etoposide_AML_180min_r2_08_49_127	303.79	-142.82	-90.51
Etoposide_AML_180min_2_76_146	303.72	-142.82	-25.57
Etoposide_AML_180min_2_76_176	303.72	-142.82	-308.88
Etoposide_AML_180min_r2_11_57_128	303.2	0	-277.33
Etoposide_AML_180min_r2_04_57_128	303.2	0	-277.33
Etoposide_AML_180min_r2_04_57_157	303.2	0	-239.42
Etoposide_AML_180min_r2_11_57_157	303.2	0	-239.42
Etoposide_AML_0min_3_92_268	303.07	-142.82	-105.89
Etoposide_AML_0min_3_92_190	303.07	0	-300.66
Etoposide_AML_0min_5_57_143	303.06	0	-1
Etoposide_AML_0min_5_57_116	303.06	0	-1
Etoposide_AML_90min_r2_3_41_95	302.96	-142.82	-249.12
Etoposide_AML_90min_r2_3_41_107	302.96	0	-222.21
Etoposide_AML_90min_r2_9_63_145	302.87	-142.82	-295.89
Etoposide_AML_90min_r2_9_63_149	302.87	-142.82	-213.7
Etoposide_AML_0min_r2_1_93_251	302.34	0	-347.72
Etoposide_AML_0min_r2_1_93_201	302.34	0	-248.6
Etoposide_AML_90min_1_93_181	302.33	0	-93.23
Etoposide_AML_90min_1_93_235	302.33	0	-272.95
Etoposide_AML_180min_4_2_2	302.03	0	-132.56
Etoposide_AML_180min_4_2_3	302.03	-142.82	-244.25
Etoposide_AML_90min_r2_6_19_35	301.8	-142.82	-55.42
Etoposide_AML_90min_r2_6_19_41	301.8	-142.82	-54.29
Etoposide_AML_0min_2_16_30	301.7	0	-95.01
Etoposide_AML_0min_2_16_58	301.7	0	-308.48
Etoposide_AML_90min_r2_6_64_130	301.48	-142.82	-294.93
Etoposide_AML_90min_r2_6_64_144	301.48	-142.82	-49.08
Etoposide_AML_180min_2_74_143	301.45	-142.82	0
Etoposide_AML_180min_2_74_173	301.45	0	-157.32
Etoposide_AML_90min_9_57_174	301.23	-142.82	-22.32
Etoposide_AML_90min_9_57_120	301.23	-142.82	-197.62
Etoposide_AML_90min_r2_4_98_214	300.93	-142.82	-328.27
Etoposide_AML_90min_r2_4_98_208	300.93	-142.82	-65.49
Etoposide_AML_90min_4_84_170	300.85	0	-93.63
Etoposide_AML_90min_4_84_201	300.85	-142.82	-141.56
Etoposide_AML_90min_3_34_80	300.81	0	-107.83
Etoposide_AML_90min_3_34_90	300.81	0	-194.34
Etoposide_AML_0min_r2_3_78_213	300.75	0	-1
Etoposide_AML_0min_r2_3_78_169	300.75	0	-1
Etoposide_AML_90min_r2_3_74_169	300.54	-142.82	-231.11
Etoposide_AML_90min_r2_3_74_190	300.54	-142.82	-4.19
Etoposide_AML_0min_3_47_148	300.5	0	-1
Etoposide_AML_0min_3_47_96	300.5	-142.82	-1
Etoposide_AML_90min_r2_4_79_169	300.32	0	-330.73
Etoposide_AML_90min_r2_4_79_175	300.32	-142.82	-219.66
Etoposide_AML_180min_r2_07_53_111	300.14	0	-360.98
Etoposide_AML_0min_r2_1_98_262	300.14	0	-313.45
Etoposide_AML_0min_r2_1_98_210	300.14	0	-306.64
Etoposide_AML_180min_r2_07_53_134	300.14	0	-111.42
Etoposide_AML_0min_r2_4_81_251	300.13	0	-1
Etoposide_AML_0min_r2_4_81_176	300.13	0	-1
Etoposide_AML_90min_9_37_73	300.02	-142.82	-335.14
Etoposide_AML_90min_9_37_114	300.02	0	-348.39
Etoposide_AML_90min_r2_6_58_133	299.36	-142.82	-61.87
Etoposide_AML_90min_r2_6_58_119	299.36	-142.82	-2.85
Etoposide_AML_0min_6_79_164	299.23	0	1
Etoposide_AML_0min_6_79_199	299.23	-428.46	-152.82
Etoposide_AML_90min_r2_6_84_172	299.05	0	-108.86
Etoposide_AML_90min_r2_6_84_186	299.05	-142.82	-70.6
Etoposide_AML_180min_2_76_177	298.85	-142.82	-304.23
Etoposide_AML_180min_2_76_147	298.85	-142.82	-395.96
Etoposide_AML_0min_r2_7_23_72	298.85	-142.82	-1
Etoposide_AML_0min_r2_7_23_45	298.85	-142.82	-1
Etoposide_AML_90min_3_68_150	298.62	-142.82	-159
Etoposide_AML_90min_3_68_165	298.62	-142.82	-300.98
Etoposide_AML_180min_5_98_251	298.44	0	-105.56
Etoposide_AML_180min_5_98_208	298.44	-142.82	-152.23
Etoposide_AML_0min_r2_7_70_209	298.35	-142.82	-1
Etoposide_AML_0min_r2_7_70_139	298.35	-142.82	-1
Etoposide_AML_0min_7_19_60	298.3	0	-191.21
Etoposide_AML_0min_7_19_45	298.3	0	-332.6
Etoposide_AML_90min_r2_2_47_143	298.19	0	-1
Etoposide_AML_90min_r2_2_47_112	298.19	0	-1
Etoposide_AML_90min_r2_5_70_163	298.12	0	-104.78
Etoposide_AML_90min_r2_5_70_141	298.12	-142.82	-77.69
Etoposide_AML_180min_5_96_247	298.11	0	-234.42
Etoposide_AML_180min_5_96_204	298.11	0	-262.77
Etoposide_AML_0min_3_81_167	297.72	0	-109.16
Etoposide_AML_0min_3_81_239	297.72	0	-173.81
Etoposide_AML_90min_2_73_147	297.52	0	-8.92
Etoposide_AML_90min_2_73_186	297.52	0	-259.57
Etoposide_AML_90min_3_72_174	297.35	0	-1
Etoposide_AML_90min_3_72_158	297.35	0	-1
Etoposide_AML_90min_r2_2_77_218	297.33	-142.82	-276.8
Etoposide_AML_90min_r2_2_77_180	297.33	-142.82	-233.08
Etoposide_AML_90min_2_4_10	297.3	-142.82	181.55
Etoposide_AML_90min_2_4_13	297.3	-142.82	-105.17
Etoposide_AML_0min_7_27_77	297.03	-142.82	-1
Etoposide_AML_0min_7_27_61	297.03	-142.82	-1
Etoposide_AML_90min_r2_2_42_101	296.56	0	-148.73
Etoposide_AML_90min_r2_2_42_129	296.56	-142.82	-32.81
Etoposide_AML_180min_3_55_138	296.5	-285.64	1
Etoposide_AML_180min_3_55_86	296.5	-428.46	-223.63
Etoposide_AML_0min_r2_2_63_130	296.48	-142.82	-286.81
Etoposide_AML_0min_r2_2_63_176	296.48	-142.82	-219.1
Etoposide_AML_0min_r2_6_71_209	296.12	0	-386.15
Etoposide_AML_0min_r2_6_71_150	296.12	0	-109.27
Etoposide_AML_90min_3_66_146	296.06	-142.82	-177.02
Etoposide_AML_90min_3_66_161	296.06	0	-311.82
Etoposide_AML_180min_r2_10_63_185	295.61	-142.82	-221.65
Etoposide_AML_180min_r2_10_63_132	295.61	0	-41.26
Etoposide_AML_0min_r2_4_89_276	295.52	0	-332.72
Etoposide_AML_0min_r2_4_89_192	295.52	-142.82	-249.63
Etoposide_AML_90min_4_67_136	295.27	0	-70.8
Etoposide_AML_90min_4_67_160	295.27	0	-325.13
Etoposide_AML_0min_6_68_182	295.15	0	1
Etoposide_AML_0min_6_68_142	295.15	-428.46	-1.05
Etoposide_AML_0min_r2_2_53_146	294.81	-142.82	-374.56
Etoposide_AML_0min_r2_2_53_106	294.81	-142.82	-119.67
Etoposide_AML_0min_6_26_56	294.79	0	-33.18
Etoposide_AML_0min_6_26_76	294.79	0	-247.45
Etoposide_AML_90min_r2_3_17_35	294.34	-142.82	-213.64
Etoposide_AML_90min_r2_3_17_41	294.34	-142.82	-203.81
Etoposide_AML_0min_7_22_66	294.07	-142.82	-1
Etoposide_AML_0min_7_22_51	294.07	-142.82	-1
Etoposide_AML_0min_6_18_51	293.97	-142.82	-4.6
Etoposide_AML_0min_6_18_39	293.97	-142.82	-49.17
Etoposide_AML_90min_r2_9_89_200	293.93	0	-315.71
Etoposide_AML_90min_r2_9_89_197	293.93	0	-164.95
Etoposide_AML_90min_r2_3_80_182	293.75	0	-75.41
Etoposide_AML_90min_r2_3_80_207	293.75	0	-30.3
Etoposide_AML_0min_r2_4_64_202	293.58	-142.82	-365.84
Etoposide_AML_0min_r2_4_64_142	293.58	-142.82	-318.64
Etoposide_AML_0min_4_47_121	293.46	-142.82	-1
Etoposide_AML_0min_4_47_104	293.46	-142.82	-1
Etoposide_AML_90min_r2_6_61_124	293.46	-142.82	-79.9
Etoposide_AML_90min_r2_6_61_140	293.46	-142.82	0
Etoposide_AML_180min_5_70_151	293.24	-285.64	1
Etoposide_AML_180min_5_70_181	293.24	0	-324.36
Etoposide_AML_90min_5_77_176	293.1	-142.82	-1
Etoposide_AML_90min_5_77_149	293.1	-142.82	-1
Etoposide_AML_90min_1_51_129	293.07	285.64	-1
Etoposide_AML_90min_1_51_100	293.07	-142.82	-1
Etoposide_AML_90min_r2_7_26_61	292.61	-142.82	-164.98
Etoposide_AML_90min_r2_7_26_59	292.61	-142.82	-12.6
Etoposide_AML_90min_r2_3_80_183	292.42	0	-271.94
Etoposide_AML_90min_r2_3_80_206	292.42	-142.82	-256.8
Etoposide_AML_90min_r2_5_78_158	292.27	0	-63.71
Etoposide_AML_90min_r2_5_78_178	292.27	285.64	335.68
Etoposide_AML_180min_4_8_14	292.22	0	-17.59
Etoposide_AML_180min_4_8_11	292.22	-142.82	-32.28
Etoposide_AML_0min_r2_8_76_160	292.03	-142.82	-186.92
Etoposide_AML_0min_r2_8_76_186	292.03	-142.82	-16.13
Etoposide_AML_180min_r2_09_39_104	291.9	-142.82	-273.69
Etoposide_AML_180min_r2_09_39_80	291.9	-142.82	-105.22
Etoposide_AML_0min_6_4_14	291.68	-142.82	-1
Etoposide_AML_0min_6_4_11	291.68	-142.82	-169.95
Etoposide_AML_180min_r2_06_38_103	291.63	-142.82	-345.99
Etoposide_AML_180min_r2_06_38_73	291.63	-142.82	-202.89
Etoposide_AML_180min_1_7_15	291.38	-142.82	-126.15
Etoposide_AML_180min_1_7_14	291.38	-142.82	-156.73
Etoposide_AML_180min_r2_10_42_90	291.35	-142.82	-241.53
Etoposide_AML_180min_r2_10_42_129	291.35	-142.82	-207.56
Etoposide_AML_90min_8_98_199	290.91	0	-109.04
Etoposide_AML_90min_8_98_265	290.91	0	-312.37
Etoposide_AML_180min_r2_02_21_48	290.73	0	-38.38
Etoposide_AML_180min_r2_02_21_45	290.73	-428.46	-36.39
Etoposide_AML_90min_2_31_65	290.71	0	-273.8
Etoposide_AML_90min_2_31_83	290.71	-142.82	-292.9
Etoposide_AML_0min_6_64_173	290.41	-142.82	-1
Etoposide_AML_0min_6_64_134	290.41	-142.82	-1
Etoposide_AML_90min_r2_5_22_52	290.12	-142.82	-322.65
Etoposide_AML_90min_r2_5_22_47	290.12	-142.82	-218.41
Etoposide_AML_0min_7_61_126	289.92	0	-1
Etoposide_AML_0min_7_61_168	289.92	0	-344.76
Etoposide_AML_180min_r2_07_24_52	289.91	-142.82	-339.4
Etoposide_AML_180min_r2_07_24_63	289.91	-142.82	-333.35
Etoposide_AML_90min_r2_9_83_183	289.84	-142.82	-106.22
Etoposide_AML_90min_r2_9_83_188	289.84	-142.82	-102.34
Etoposide_AML_90min_5_13_26	289.55	-142.82	-14.29
Etoposide_AML_90min_5_13_32	289.55	-142.82	-177.61
Etoposide_AML_90min_r2_4_76_168	289.5	0	-1
Etoposide_AML_90min_r2_4_76_162	289.5	0	-1
Etoposide_AML_90min_r2_7_64_148	289.47	-142.82	-257.12
Etoposide_AML_90min_r2_7_64_144	289.47	-142.82	-14.57
Etoposide_AML_90min_5_15_35	289.3	0	-1
Etoposide_AML_90min_5_15_29	289.3	0	-1
Etoposide_AML_90min_r2_6_14_26	289.13	-142.82	-242.99
Etoposide_AML_90min_r2_6_14_30	289.13	-142.82	-42.79
Etoposide_AML_90min_9_97_286	289.11	0	-1
Etoposide_AML_90min_9_97_198	289.11	0	-1
Etoposide_AML_0min_r2_4_79_246	288.72	-142.82	-304.32
Etoposide_AML_0min_r2_4_79_173	288.72	-142.82	-212.47
Etoposide_AML_0min_6_59_165	288.66	0	-7.22
Etoposide_AML_0min_6_59_125	288.66	-142.82	-205.14
Etoposide_AML_0min_3_43_138	288.62	-142.82	-51.96
Etoposide_AML_0min_3_43_88	288.62	-142.82	-142.69
Etoposide_AML_90min_r2_4_69_155	288.57	-142.82	-133.1
Etoposide_AML_90min_r2_4_69_149	288.57	-285.64	-1
Etoposide_AML_90min_9_63_190	288.48	0	-43.46
Etoposide_AML_90min_9_63_131	288.48	0	-327.62
Etoposide_AML_0min_r2_8_69_171	288.27	-142.82	-331.91
Etoposide_AML_0min_r2_8_69_145	288.27	-142.82	-313
Etoposide_AML_180min_r2_05_36_71	288.15	-142.82	-256.43
Etoposide_AML_180min_r2_05_36_95	288.15	0	-51.2
Etoposide_AML_180min_r2_06_24_67	288.04	0	-1
Etoposide_AML_180min_r2_06_24_48	288.04	0	-1
Etoposide_AML_180min_7_14_46	287.99	0	-1
Etoposide_AML_180min_7_14_34	287.99	0	-1
Etoposide_AML_180min_2_83_158	287.78	0	-1
Etoposide_AML_180min_2_83_191	287.78	0	-1
Etoposide_AML_90min_3_33_87	287.49	0	-1
Etoposide_AML_90min_3_33_79	287.49	0	-1
Etoposide_AML_90min_1_11_22	287.3	0	-207.74
Etoposide_AML_90min_1_11_24	287.3	0	-239.71
Etoposide_AML_180min_2_2_3	287.26	-142.82	-94.48
Etoposide_AML_180min_2_2_4	287.26	-142.82	-363.53
Etoposide_AML_0min_r2_5_92_187	287.23	0	-328.19
Etoposide_AML_0min_r2_5_92_272	287.23	0	-311.28
Etoposide_AML_90min_8_80_216	287.07	0	-111.49
Etoposide_AML_90min_8_80_161	287.07	0	-348.58
Etoposide_AML_90min_r2_8_31_72	287.07	0	-322.66
Etoposide_AML_90min_r2_8_31_72	287.07	0	-192.79
Etoposide_AML_90min_8_91_188	286.99	-142.82	-92.68
Etoposide_AML_90min_8_91_245	286.99	-142.82	-342.6
Etoposide_AML_90min_3_54_136	286.77	0	-122.13
Etoposide_AML_90min_3_54_123	286.77	0	-366.37
Etoposide_AML_90min_5_38_72	286.39	0	-248.12
Etoposide_AML_90min_5_38_86	286.39	0	-287.24
Etoposide_AML_90min_2_49_125	286.38	-142.82	-1
Etoposide_AML_90min_2_49_100	286.38	-142.82	-1
Etoposide_AML_0min_r2_1_88_194	285.97	-142.82	-290.88
Etoposide_AML_0min_r2_1_88_240	285.97	-142.82	-137.9
Etoposide_AML_0min_2_16_59	285.9	0	-49.46
Etoposide_AML_0min_2_16_31	285.9	-142.82	-95.77
Etoposide_AML_90min_3_76_167	285.82	0	-96.61
Etoposide_AML_90min_3_76_183	285.82	0	-341.78
Etoposide_AML_90min_4_93_217	285.41	0	-133.38
Etoposide_AML_90min_4_93_185	285.41	0	-302.64
Etoposide_AML_0min_r2_8_52_128	285.3	0	-123.72
Etoposide_AML_0min_r2_8_52_109	285.3	0	1
Etoposide_AML_0min_3_71_213	285.25	0	1
Etoposide_AML_0min_3_71_147	285.25	0	-221.72
Etoposide_AML_180min_1_71_116	285.07	0	1
Etoposide_AML_180min_1_71_153	285.07	-285.64	-300.62
Etoposide_AML_180min_r2_04_62_136	284.99	0	-293.28
Etoposide_AML_180min_r2_11_62_136	284.99	0	-293.28
Etoposide_AML_180min_r2_11_62_166	284.99	0	-62.54
Etoposide_AML_180min_r2_04_62_166	284.99	0	-62.54
Etoposide_AML_90min_r2_2_25_68	284.8	0	-316.38
Etoposide_AML_90min_r2_2_25_81	284.8	0	-130.63
Etoposide_AML_0min_r2_5_39_79	284.71	0	-183.4
Etoposide_AML_0min_r2_5_39_115	284.71	0	-32.94
Etoposide_AML_0min_2_14_52	284.61	0	-1.59
Etoposide_AML_0min_2_14_27	284.61	0	-205.08
Etoposide_AML_90min_r2_2_58_172	284.6	0	-355.23
Etoposide_AML_180min_r2_11_66_168	284.6	-142.82	-297.6
Etoposide_AML_180min_r2_04_66_168	284.6	-142.82	-297.6
Etoposide_AML_180min_r2_11_66_140	284.6	-142.82	-77.12
Etoposide_AML_180min_r2_04_66_140	284.6	-142.82	-77.12
Etoposide_AML_90min_r2_2_58_136	284.6	0	-73.27
Etoposide_AML_0min_r2_1_14_40	284.56	-142.82	-1
Etoposide_AML_0min_r2_1_14_37	284.56	-142.82	-1
Etoposide_AML_180min_r2_10_70_143	284.5	-142.82	-154.73
Etoposide_AML_180min_r2_10_70_194	284.5	0	-99.37
Etoposide_AML_90min_r2_5_89_179	284.45	-142.82	-301.8
Etoposide_AML_90min_r2_5_89_201	284.45	-142.82	-295.34
Etoposide_AML_90min_r2_6_67_151	284.41	0	-1
Etoposide_AML_90min_r2_6_67_137	284.41	0	-1
Etoposide_AML_90min_3_67_148	284.4	0	-24.14
Etoposide_AML_90min_3_67_163	284.4	0	-96.12
Etoposide_AML_90min_r2_5_78_177	284.26	-142.82	-208.43
Etoposide_AML_90min_r2_5_78_157	284.26	-142.82	-146.57
Etoposide_AML_90min_r2_4_96_209	283.87	-142.82	-302.08
Etoposide_AML_90min_r2_4_96_204	283.87	-142.82	-201.51
Etoposide_AML_90min_5_73_142	283.49	0	-1
Etoposide_AML_90min_5_73_166	283.49	-142.82	-69.53
Etoposide_AML_180min_1_6_11	283.44	0	-297.89
Etoposide_AML_180min_1_6_13	283.44	-142.82	-334.9
Etoposide_AML_180min_r2_05_0_1	283.31	-142.82	-285.36
Etoposide_AML_180min_r2_05_0_0	283.31	-142.82	-41.78
Etoposide_AML_0min_6_66_177	283.21	-142.82	-1
Etoposide_AML_0min_6_66_139	283.21	-142.82	-172.11
Etoposide_AML_90min_r2_1_74_190	282.99	0	-142.01
Etoposide_AML_90min_r2_1_74_157	282.99	0	-50.84
Etoposide_AML_90min_r2_9_30_74	282.87	-142.82	-218.99
[truncated: 3,223 more rows]

## Sheet: CONTROL sum
Signal number	physical_distance	ellipsoid_distance	distance_to_surface
Etoposide_AML_control_r2_2_28_83	1830.99	0	-1
Etoposide_AML_control_r2_2_28_62	1830.99	0	-105.1
Etoposide_AML_control_2_12_35	1361.44	-142.82	-1
Etoposide_AML_control_2_12_193	1361.44	0	-1
Etoposide_AML_control_4_63_143	837.23	0	-265.52
Etoposide_AML_control_4_63_129	837.23	-142.82	-326.11
Etoposide_AML_control_r2_9_82_177	793.76	-142.82	-44.99
Etoposide_AML_control_r2_9_82_267	793.76	-142.82	-91.99
Etoposide_AML_control_5_97_238	768.2	-142.82	-1
Etoposide_AML_control_5_97_198	768.2	0	-1
Etoposide_AML_control_7_72_205	767	0	-78.44
Etoposide_AML_control_7_72_147	767	0	-275.93
Etoposide_AML_control_2_64_165	754.29	-142.82	-266.85
Etoposide_AML_control_2_64_128	754.29	-142.82	-319.85
Etoposide_AML_control_r2_2_48_109	752.89	-142.82	-254.74
Etoposide_AML_control_r2_2_48_142	752.89	0	-343.52
Etoposide_AML_control_4_75_170	734.93	0	-244.04
Etoposide_AML_control_4_75_152	734.93	-142.82	-351.09
Etoposide_AML_control_2_47_91	724.89	-142.82	-249.84
Etoposide_AML_control_2_47_124	724.89	0	-267.42
Etoposide_AML_control_r2_7_38_130	723.64	-142.82	-1
Etoposide_AML_control_r2_7_38_80	723.64	-142.82	-1
Etoposide_AML_control_r2_8_69_220	711.85	0	-11.42
Etoposide_AML_control_r2_8_69_156	711.85	-142.82	-104.34
Etoposide_AML_control_r2_5_97_240	701.4	0	-231.77
Etoposide_AML_control_r2_5_97_194	701.4	-142.82	-359.85
Etoposide_AML_control_r2_1_22_83	694.44	-142.82	-282.02
Etoposide_AML_control_r2_1_22_54	694.44	-142.82	-317.38
Etoposide_AML_control_6_92_188	680.9	0	-1
Etoposide_AML_control_6_92_224	680.9	0	-288.57
Etoposide_AML_control_2_17_45	670.59	0	-257.95
Etoposide_AML_control_2_17_32	670.59	-285.64	-370.27
Etoposide_AML_control_5_48_121	651	0	-99.73
Etoposide_AML_control_5_48_96	651	-142.82	-250.39
Etoposide_AML_control_6_84_171	640.69	0	-1
Etoposide_AML_control_6_84_206	640.69	-142.82	-112.13
Etoposide_AML_control_7_9_25	633.76	0	-148.52
Etoposide_AML_control_7_9_18	633.76	-142.82	-224.12
Etoposide_AML_control_r2_6_61_160	618.23	0	1
Etoposide_AML_control_r2_6_61_122	618.23	0	-314.47
Etoposide_AML_control_r2_7_43_90	611.8	0	-10.72
Etoposide_AML_control_r2_7_43_146	611.8	-142.82	-332.73
Etoposide_AML_control_r2_5_64_164	609.79	0	-28.45
Etoposide_AML_control_r2_5_64_134	609.79	0	-306.52
Etoposide_AML_control_r2_1_22_82	609.66	0	-64.28
Etoposide_AML_control_r2_1_22_53	609.66	0	-79.48
Etoposide_AML_control_1_33_62	601.85	0	-91.19
Etoposide_AML_control_1_33_93	601.85	-142.82	-371.8
Etoposide_AML_control_r2_6_26_50	589.6	0	-227.71
Etoposide_AML_control_r2_6_26_67	589.6	-142.82	-315.53
Etoposide_AML_control_r2_5_77_158	588.64	-142.82	-170.59
Etoposide_AML_control_r2_5_77_197	588.64	-142.82	-316.46
Etoposide_AML_control_r2_3_96_217	585.59	0	-188.33
Etoposide_AML_control_r2_3_96_288	585.59	0	-340.66
Etoposide_AML_control_2_45_87	582.13	0	-98.63
Etoposide_AML_control_2_45_118	582.13	-142.82	-378.59
Etoposide_AML_control_4_26_57	581.47	0	-118.9
Etoposide_AML_control_4_26_61	581.47	0	-371.12
Etoposide_AML_control_4_48_99	579.84	0	-258.48
Etoposide_AML_control_4_48_109	579.84	0	-371.26
Etoposide_AML_control_6_90_219	574.04	-428.46	-288.65
Etoposide_AML_control_6_90_183	574.04	0	-365.99
Etoposide_AML_control_3_14_23	572.22	0	-12.44
Etoposide_AML_control_3_14_35	572.22	-142.82	-248.76
Etoposide_AML_control_r2_6_70_184	568.33	0	-1
Etoposide_AML_control_r2_6_70_145	568.33	-142.82	-1
Etoposide_AML_control_r2_4_30_69	562.96	0	-128.32
Etoposide_AML_control_r2_4_30_77	562.96	-142.82	-274.74
Etoposide_AML_control_6_77_188	558.01	-142.82	-25.98
Etoposide_AML_control_6_77_157	558.01	-142.82	-296.18
Etoposide_AML_control_r2_2_4_9	552.29	-142.82	-1
Etoposide_AML_control_r2_2_4_6	552.29	-428.46	-1
Etoposide_AML_control_3_65_173	549.97	0	-65.48
Etoposide_AML_control_3_65_125	549.97	-142.82	-254.77
Etoposide_AML_control_3_96_256	546.06	0	-1
Etoposide_AML_control_3_96_185	546.06	-142.82	-263.14
Etoposide_AML_control_r2_8_85_267	543.67	0	-189.47
Etoposide_AML_control_r2_8_85_191	543.67	-142.82	-304.22
Etoposide_AML_control_r2_3_67_152	542.77	0	-4.77
Etoposide_AML_control_r2_3_67_211	542.77	0	-369.17
Etoposide_AML_control_6_88_214	535.02	-142.82	-267.32
Etoposide_AML_control_6_88_180	535.02	-142.82	-284.59
Etoposide_AML_control_4_31_67	534.43	0	-153.52
Etoposide_AML_control_4_31_72	534.43	0	-246.57
Etoposide_AML_control_5_54_135	533.8	142.82	282.69
Etoposide_AML_control_5_54_110	533.8	0	-164.17
Etoposide_AML_control_6_59_120	531.68	0	-15.06
Etoposide_AML_control_6_59_146	531.68	-142.82	-282.04
Etoposide_AML_control_6_47_97	531.48	0	-145.41
Etoposide_AML_control_6_47_118	531.48	0	-217.19
Etoposide_AML_control_r2_6_70_144	526.74	0	-44.44
Etoposide_AML_control_r2_6_70_183	526.74	0	-157.4
Etoposide_AML_control_r2_4_26_56	525.17	0	-109.95
Etoposide_AML_control_r2_4_26_66	525.17	0	-343.93
Etoposide_AML_control_7_98_203	525.12	-142.82	349.85
Etoposide_AML_control_7_98_273	525.12	-142.82	34.7
Etoposide_AML_control_r2_7_27_97	523.89	-142.82	-1
Etoposide_AML_control_r2_7_27_58	523.89	-142.82	-293.86
Etoposide_AML_control_6_52_130	518.53	-142.82	-25.18
Etoposide_AML_control_6_52_108	518.53	-142.82	-213.36
Etoposide_AML_control_r2_7_43_91	516.01	0	-174.86
Etoposide_AML_control_r2_7_43_147	516.01	-142.82	-327.52
Etoposide_AML_control_4_37_78	513.57	-142.82	-143.49
Etoposide_AML_control_4_37_84	513.57	0	-270.37
Etoposide_AML_control_r2_4_81_205	504.22	-142.82	159.26
Etoposide_AML_control_r2_4_81_177	504.22	-142.82	-142.32
Etoposide_AML_control_3_87_167	500.99	-142.82	-1
Etoposide_AML_control_3_87_231	500.99	-142.82	-132.45
Etoposide_AML_control_5_87_177	500.29	0	-226.17
Etoposide_AML_control_5_87_215	500.29	0	-272.34
Etoposide_AML_control_7_78_161	499.73	0	-157.12
Etoposide_AML_control_7_78_219	499.73	0	-185.37
Etoposide_AML_control_6_96_234	497.34	-142.82	-331.45
Etoposide_AML_control_6_96_196	497.34	-142.82	-333.62
Etoposide_AML_control_r2_4_94_201	496.07	0	-140.43
Etoposide_AML_control_r2_4_94_230	496.07	0	-310.66
Etoposide_AML_control_r2_6_74_191	495.65	-142.82	-1
Etoposide_AML_control_r2_6_74_152	495.65	-142.82	-1
Etoposide_AML_control_r2_5_75_192	495.24	-142.82	-242.11
Etoposide_AML_control_r2_5_75_154	495.24	0	-277.74
Etoposide_AML_control_5_56_139	494.15	0	1
Etoposide_AML_control_5_56_114	494.15	0	-1
Etoposide_AML_control_r2_2_71_212	493.98	-142.82	-1
Etoposide_AML_control_r2_2_71_158	493.98	0	-1
Etoposide_AML_control_2_27_70	491.55	-142.82	-22.1
Etoposide_AML_control_2_27_51	491.55	-142.82	-369.7
Etoposide_AML_control_r2_4_35_94	490.65	0	1
Etoposide_AML_control_r2_4_35_84	490.65	0	-341.93
Etoposide_AML_control_r2_3_85_262	490.6	0	-1
Etoposide_AML_control_r2_3_85_196	490.6	0	-1
Etoposide_AML_control_r2_5_28_79	490.53	-142.82	-110.27
Etoposide_AML_control_r2_5_28_63	490.53	-142.82	-264.61
Etoposide_AML_control_r2_6_97_246	490.5	-142.82	-115.63
Etoposide_AML_control_r2_6_97_205	490.5	0	-224.76
Etoposide_AML_control_5_37_95	489.76	0	-109.54
Etoposide_AML_control_5_37_74	489.76	0	-273.52
Etoposide_AML_control_r2_6_22_59	489.27	0	-240.62
Etoposide_AML_control_r2_6_22_44	489.27	-142.82	-296.31
Etoposide_AML_control_3_59_160	487.14	0	-19.03
Etoposide_AML_control_3_59_113	487.14	0	-322.2
Etoposide_AML_control_r2_2_63_182	486.61	0	-90.65
Etoposide_AML_control_r2_2_63_139	486.61	0	-343.03
Etoposide_AML_control_r2_3_35_114	486.54	0	-348.45
Etoposide_AML_control_r2_3_35_83	486.54	-142.82	-353.03
Etoposide_AML_control_2_33_85	483.21	-142.82	-1
Etoposide_AML_control_2_33_64	483.21	-142.82	-1
Etoposide_AML_control_r2_4_70_154	482.5	-142.82	-139.19
Etoposide_AML_control_r2_4_70_178	482.5	-142.82	-315.58
Etoposide_AML_control_4_9_22	482.39	0	-12.12
Etoposide_AML_control_4_9_22	482.39	-142.82	-38.45
Etoposide_AML_control_r2_3_29_68	482.2	0	-75.25
Etoposide_AML_control_r2_3_29_95	482.2	-142.82	-342.84
Etoposide_AML_control_r2_6_42_108	480.68	-142.82	-1
Etoposide_AML_control_r2_6_42_85	480.68	-142.82	-161.9
Etoposide_AML_control_r2_5_81_206	480.67	-142.82	-113.8
Etoposide_AML_control_r2_5_81_165	480.67	-142.82	-224.22
Etoposide_AML_control_2_58_151	479.36	0	-29.64
Etoposide_AML_control_2_58_116	479.36	-142.82	-261.9
Etoposide_AML_control_5_37_94	475.88	0	-80.58
Etoposide_AML_control_5_37_73	475.88	-142.82	-198.25
Etoposide_AML_control_1_31_87	474.51	-142.82	-319.35
Etoposide_AML_control_1_31_59	474.51	-142.82	-359.18
Etoposide_AML_control_2_63_126	473.79	0	-187.71
Etoposide_AML_control_2_63_163	473.79	0	-276.56
Etoposide_AML_control_4_63_128	470.85	-142.82	-39.75
Etoposide_AML_control_4_63_144	470.85	-142.82	-390.15
Etoposide_AML_control_3_25_41	470.4	-142.82	-133.56
Etoposide_AML_control_3_25_65	470.4	-142.82	-196.68
Etoposide_AML_control_4_29_68	467.78	-142.82	-1
Etoposide_AML_control_4_29_62	467.78	-142.82	-1
Etoposide_AML_control_r2_6_92_237	467.2	0	1
Etoposide_AML_control_r2_6_92_195	467.2	0	-226.24
Etoposide_AML_control_r2_6_88_228	464.53	0	1
Etoposide_AML_control_r2_6_88_184	464.53	0	-1
Etoposide_AML_control_r2_5_33_90	459.32	0	-160.76
Etoposide_AML_control_r2_5_33_74	459.32	-142.82	-273.98
Etoposide_AML_control_r2_7_37_129	456.68	0	-1
Etoposide_AML_control_r2_7_37_79	456.68	0	-200.09
Etoposide_AML_control_2_96_191	455.06	0	-102.02
Etoposide_AML_control_2_96_247	455.06	0	-329.79
Etoposide_AML_control_r2_5_82_167	454.52	0	-133.44
Etoposide_AML_control_r2_5_82_208	454.52	-142.82	-309.09
Etoposide_AML_control_r2_2_36_108	451.66	0	-39.4
Etoposide_AML_control_r2_2_36_81	451.66	-428.46	-68.8
Etoposide_AML_control_6_86_175	451.51	-142.82	-191.01
Etoposide_AML_control_6_86_211	451.51	-142.82	-312.77
Etoposide_AML_control_r2_5_53_138	451.28	-142.82	-7.45
Etoposide_AML_control_r2_5_53_110	451.28	-142.82	-156.1
Etoposide_AML_control_3_80_213	448.69	-142.82	-134.08
Etoposide_AML_control_3_80_153	448.69	-142.82	-357.07
Etoposide_AML_control_7_84_174	448.07	-285.64	1
Etoposide_AML_control_7_84_235	448.07	0	-142.1
Etoposide_AML_control_2_98_194	447.85	0	1
Etoposide_AML_control_2_98_251	447.85	0	-356.04
Etoposide_AML_control_5_9_25	447.28	0	-259.2
Etoposide_AML_control_5_9_22	447.28	0	-408.24
Etoposide_AML_control_3_42_109	445.92	0	-63.67
Etoposide_AML_control_3_42_74	445.92	0	-207.72
Etoposide_AML_control_2_12_34	445.65	-142.82	-1
Etoposide_AML_control_2_12_24	445.65	-142.82	-1
Etoposide_AML_control_7_98_202	444.09	0	-359.91
Etoposide_AML_control_7_98_272	444.09	0	-403.04
Etoposide_AML_control_5_87_214	443.48	-142.82	-37.47
Etoposide_AML_control_5_87_176	443.48	0	-58.88
Etoposide_AML_control_3_63_169	441.39	-142.82	-13.29
Etoposide_AML_control_3_63_121	441.39	-142.82	-339.48
Etoposide_AML_control_r2_4_56_126	441.18	-142.82	-8.35
Etoposide_AML_control_r2_4_56_142	441.18	0	-35.79
Etoposide_AML_control_5_76_189	439.04	0	1
Etoposide_AML_control_5_76_155	439.04	0	-1
Etoposide_AML_control_5_53_107	435.25	0	-93.74
Etoposide_AML_control_5_53_133	435.25	0	-262.5
Etoposide_AML_control_1_61_121	430.98	0	-19.78
Etoposide_AML_control_1_61_172	430.98	0	-358.51
Etoposide_AML_control_r2_2_36_46	429.68	-428.46	1
Etoposide_AML_control_r2_2_36_107	429.68	0	-189.52
Etoposide_AML_control_r2_7_78_255	429.31	0	-192.45
Etoposide_AML_control_r2_7_78_160	429.31	-142.82	-214.73
Etoposide_AML_control_4_97_193	426.94	-142.82	-93.86
Etoposide_AML_control_4_97_216	426.94	-142.82	-336.99
Etoposide_AML_control_2_49_127	426.03	-142.82	-1
Etoposide_AML_control_2_49_96	426.03	-142.82	-1
Etoposide_AML_control_r2_4_52_117	425.4	-142.82	-1
Etoposide_AML_control_r2_4_52_133	425.4	-142.82	-146.86
Etoposide_AML_control_r2_6_10_21	425.22	-142.82	-71.46
Etoposide_AML_control_r2_6_10_27	425.22	-142.82	-286.97
Etoposide_AML_control_1_87_240	423.64	0	-145.77
Etoposide_AML_control_1_87_173	423.64	-142.82	-238.81
Etoposide_AML_control_4_55_112	423.38	0	1
Etoposide_AML_control_4_55_124	423.38	0	-184.31
Etoposide_AML_control_r2_8_58_188	423.1	-142.82	-53.98
Etoposide_AML_control_r2_8_58_132	423.1	-142.82	-250.22
Etoposide_AML_control_1_42_82	422.1	-142.82	-25.06
Etoposide_AML_control_1_42_117	422.1	0	-424.3
Etoposide_AML_control_4_71_160	419.81	-142.82	-184.03
Etoposide_AML_control_4_71_145	419.81	-142.82	-233.11
Etoposide_AML_control_6_35_73	418.33	0	1
Etoposide_AML_control_6_35_88	418.33	0	-18.38
Etoposide_AML_control_r2_3_49_155	418.15	0	-232.5
Etoposide_AML_control_r2_3_49_113	418.15	0	-324.77
Etoposide_AML_control_3_84_161	417.01	-142.82	-195.53
Etoposide_AML_control_3_84_224	417.01	-142.82	-325.55
Etoposide_AML_control_r2_3_64_203	414.96	0	-1
Etoposide_AML_control_r2_3_64_145	414.96	0	-1
Etoposide_AML_control_5_93_190	414.77	0	-106.12
Etoposide_AML_control_5_93_229	414.77	0	-261.3
Etoposide_AML_control_6_42_87	411.2	-142.82	-306.71
Etoposide_AML_control_6_42_107	411.2	-142.82	-369.6
Etoposide_AML_control_6_3_9	410.01	0	-66.27
Etoposide_AML_control_6_3_9	410.01	0	-336.9
Etoposide_AML_control_r2_3_68_212	409.25	-142.82	-1
Etoposide_AML_control_r2_3_68_154	409.25	-142.82	-1
Etoposide_AML_control_3_84_223	408.64	-142.82	-59.56
Etoposide_AML_control_3_84_162	408.64	-285.64	-224.51
Etoposide_AML_control_7_73_207	408.25	-142.82	-1
Etoposide_AML_control_7_73_150	408.25	-142.82	-1
Etoposide_AML_control_r2_3_78_179	407.59	0	-133.06
Etoposide_AML_control_r2_3_78_240	407.59	0	-246.8
Etoposide_AML_control_7_34_69	407.55	-142.82	-3.59
Etoposide_AML_control_7_34_99	407.55	-142.82	-384.12
Etoposide_AML_control_r2_4_18_46	407.09	0	-79.42
Etoposide_AML_control_r2_4_18_41	407.09	0	-245.61
Etoposide_AML_control_4_38_80	405.77	0	-73.61
Etoposide_AML_control_4_38_86	405.77	0	-218.97
Etoposide_AML_control_4_79_176	405.15	-142.82	-98.21
Etoposide_AML_control_4_79_159	405.15	-142.82	-342.38
Etoposide_AML_control_4_93_210	404.5	0	1
Etoposide_AML_control_4_93_185	404.5	0	0
Etoposide_AML_control_6_83_205	404.21	0	-1
Etoposide_AML_control_6_83_170	404.21	-142.82	-270.73
Etoposide_AML_control_6_88_179	403.4	0	-100.12
Etoposide_AML_control_6_88_215	403.4	0	-234.1
Etoposide_AML_control_r2_4_71_180	402.5	0	-284.91
Etoposide_AML_control_r2_4_71_157	402.5	0	-354.77
Etoposide_AML_control_6_66_163	402.49	-142.82	-36.33
Etoposide_AML_control_6_66_134	402.49	0	-194.6
Etoposide_AML_control_r2_8_5_17	402.05	-142.82	-206.8
Etoposide_AML_control_r2_8_5_9	402.05	-142.82	-386.14
Etoposide_AML_control_5_50_102	401.16	0	-255.1
Etoposide_AML_control_5_50_126	401.16	-142.82	-350.19
Etoposide_AML_control_r2_7_27_98	400.23	0	-1
Etoposide_AML_control_r2_7_27_59	400.23	-142.82	-1
Etoposide_AML_control_5_84_208	399.56	0	-67.98
Etoposide_AML_control_5_84_170	399.56	0	-238.21
Etoposide_AML_control_r2_4_87_218	399.54	-142.82	-1
Etoposide_AML_control_r2_4_87_187	399.54	0	-1
Etoposide_AML_control_r2_4_53_120	398.99	-142.82	-115.87
Etoposide_AML_control_r2_4_53_135	398.99	0	-344.46
Etoposide_AML_control_r2_7_23_84	398.15	-142.82	-1
Etoposide_AML_control_r2_7_23_50	398.15	-142.82	-1
Etoposide_AML_control_r2_4_94_231	397.97	0	-39.36
Etoposide_AML_control_r2_4_94_202	397.97	-142.82	-314.57
Etoposide_AML_control_r2_1_30_72	397.45	0	-170.18
Etoposide_AML_control_r2_1_30_112	397.45	-428.46	-266.01
Etoposide_AML_control_1_74_148	397.29	0	-255.09
Etoposide_AML_control_1_74_210	397.29	0	-316.15
Etoposide_AML_control_2_59_117	394.46	0	-272.22
Etoposide_AML_control_2_59_153	394.46	0	-351.06
Etoposide_AML_control_4_36_82	392.77	-142.82	-1
Etoposide_AML_control_4_36_76	392.77	0	-1
Etoposide_AML_control_3_97_187	390.9	0	-74.8
Etoposide_AML_control_3_97_257	390.9	0	-298.66
Etoposide_AML_control_r2_5_26_59	389.49	-142.82	-122.27
Etoposide_AML_control_r2_5_26_75	389.49	-142.82	-228.32
Etoposide_AML_control_4_64_146	388.54	0	-210.97
Etoposide_AML_control_4_64_130	388.54	0	-394.64
Etoposide_AML_control_r2_4_56_125	388.53	0	-76.57
Etoposide_AML_control_r2_4_56_141	388.53	0	-322.35
Etoposide_AML_control_5_73_182	388.16	0	-10.63
Etoposide_AML_control_5_73_149	388.16	0	-300.66
Etoposide_AML_control_r2_3_29_94	387.84	-142.82	-288.77
Etoposide_AML_control_r2_3_29_67	387.84	-142.82	-365.13
Etoposide_AML_control_4_75_169	387.09	0	-73.3
Etoposide_AML_control_4_75_153	387.09	-142.82	-262.01
Etoposide_AML_control_1_72_203	386.67	0	-64.17
Etoposide_AML_control_1_72_144	386.67	0	-324.94
Etoposide_AML_control_r2_2_61_134	386.31	-142.82	-131.35
Etoposide_AML_control_r2_2_61_177	386.31	-142.82	-378.19
Etoposide_AML_control_r2_3_74_228	385.72	-142.82	-171.36
Etoposide_AML_control_r2_3_74_167	385.72	-142.82	-210.11
Etoposide_AML_control_1_72_145	385.44	0	1
Etoposide_AML_control_1_72_202	385.44	0	-416.82
Etoposide_AML_control_3_82_219	385.22	-142.82	-101.77
Etoposide_AML_control_3_82_158	385.22	0	-261.54
Etoposide_AML_control_6_43_89	384.34	-142.82	-6.74
Etoposide_AML_control_6_43_108	384.34	-142.82	-384.05
Etoposide_AML_control_1_68_137	382.25	0	-276.48
Etoposide_AML_control_1_68_192	382.25	0	-381.45
Etoposide_AML_control_r2_8_58_133	381.44	-142.82	-248.05
Etoposide_AML_control_r2_8_58_187	381.44	-142.82	-311.68
Etoposide_AML_control_3_69_181	379.89	-142.82	-6.81
Etoposide_AML_control_3_69_132	379.89	-142.82	-326.82
Etoposide_AML_control_4_95_190	379.15	0	-144.01
Etoposide_AML_control_4_95_213	379.15	0	-147.47
Etoposide_AML_control_5_65_132	377.64	-142.82	-18.44
Etoposide_AML_control_5_65_162	377.64	-142.82	-338.14
Etoposide_AML_control_r2_3_97_218	377.5	0	1
Etoposide_AML_control_r2_3_97_290	377.5	0	-13.21
Etoposide_AML_control_r2_6_62_163	377.16	0	-1
Etoposide_AML_control_r2_6_62_124	377.16	0	-1
Etoposide_AML_control_4_37_79	377.02	-142.82	-51.56
Etoposide_AML_control_4_37_85	377.02	-142.82	-260.09
Etoposide_AML_control_5_48_122	374.89	0	-55.46
Etoposide_AML_control_5_48_97	374.89	-142.82	-309.38
Etoposide_AML_control_r2_4_71_181	374.01	0	-116.8
Etoposide_AML_control_r2_4_71_156	374.01	-142.82	-156.48
Etoposide_AML_control_r2_8_67_153	373.84	0	-233.56
Etoposide_AML_control_r2_8_67_216	373.84	0	-287.67
Etoposide_AML_control_r2_3_78_241	373.64	0	-1
Etoposide_AML_control_r2_3_78_180	373.64	-142.82	-1
Etoposide_AML_control_6_43_109	373.57	0	-1
Etoposide_AML_control_6_43_88	373.57	0	-1
Etoposide_AML_control_1_35_97	373.37	0	1
Etoposide_AML_control_1_35_66	373.37	-142.82	-259.95
Etoposide_AML_control_6_70_143	373.36	0	-1
Etoposide_AML_control_6_70_173	373.36	0	-9.4
Etoposide_AML_control_r2_8_56_183	372.95	0	-309.91
Etoposide_AML_control_r2_8_56_127	372.95	-142.82	-366.25
Etoposide_AML_control_r2_4_77_169	372.38	-142.82	-234.91
Etoposide_AML_control_r2_4_77_194	372.38	-142.82	-304.8
Etoposide_AML_control_1_71_143	371.87	-142.82	-88.44
Etoposide_AML_control_1_71_201	371.87	-142.82	-406
Etoposide_AML_control_5_33_84	369.71	0	-117.5
Etoposide_AML_control_5_33_65	369.71	-142.82	-168.63
Etoposide_AML_control_4_74_167	369.42	0	-188
Etoposide_AML_control_4_74_151	369.42	0	-291.68
Etoposide_AML_control_r2_6_33_86	368.75	-142.82	-259
Etoposide_AML_control_r2_6_33_64	368.75	-142.82	-314.53
Etoposide_AML_control_r2_4_53_136	368.46	0	-88.84
Etoposide_AML_control_r2_4_53_119	368.46	0	-150.79
Etoposide_AML_control_6_67_136	367.7	0	-95.44
Etoposide_AML_control_6_67_165	367.7	-428.46	-230.29
Etoposide_AML_control_r2_5_14_44	367.62	0	1
Etoposide_AML_control_r2_5_14_34	367.62	0	-39.9
Etoposide_AML_control_6_51_127	365.71	0	-154.33
Etoposide_AML_control_6_51_105	365.71	-142.82	-308.17
Etoposide_AML_control_r2_2_32_71	364.61	-142.82	-4.99
Etoposide_AML_control_r2_2_32_94	364.61	-142.82	-338.95
Etoposide_AML_control_r2_3_72_223	364.35	-142.82	-1
Etoposide_AML_control_r2_3_72_163	364.35	0	-1
Etoposide_AML_control_6_82_202	363.74	0	-354.72
Etoposide_AML_control_6_82_168	363.74	-142.82	-366.33
Etoposide_AML_control_4_74_168	363.59	-428.46	-28.55
Etoposide_AML_control_4_74_150	363.59	0	-167.23
Etoposide_AML_control_r2_5_48_127	363.12	-142.82	-297.12
Etoposide_AML_control_r2_5_48_102	363.12	-142.82	-312.51
Etoposide_AML_control_r2_9_40_138	362.66	-142.82	-9.8
Etoposide_AML_control_r2_9_40_86	362.66	-142.82	-315.74
Etoposide_AML_control_r2_3_22_73	362.38	0	-1
Etoposide_AML_control_r2_3_22_53	362.38	-142.82	-1
Etoposide_AML_control_6_40_82	362.15	-142.82	-231.65
Etoposide_AML_control_6_40_102	362.15	-142.82	-244.38
Etoposide_AML_control_3_57_109	361.6	-142.82	-82.72
Etoposide_AML_control_3_57_156	361.6	0	-307.09
Etoposide_AML_control_r2_2_19_203	361.21	-142.82	-130.47
Etoposide_AML_control_r2_2_19_273	361.21	-142.82	-295.28
Etoposide_AML_control_r2_6_97_204	360.52	0	1
Etoposide_AML_control_r2_6_97_247	360.52	0	-57.1
Etoposide_AML_control_r2_7_73_238	360.3	0	-174.49
Etoposide_AML_control_r2_7_73_151	360.3	-285.64	-396.69
Etoposide_AML_control_r2_2_96_269	360.23	-142.82	-249.07
Etoposide_AML_control_r2_2_96_201	360.23	-142.82	-334.02
Etoposide_AML_control_7_77_160	359.91	-142.82	-305.4
Etoposide_AML_control_7_77_217	359.91	-142.82	-388.67
Etoposide_AML_control_r2_6_80_207	359.3	-142.82	-104.19
Etoposide_AML_control_r2_6_80_168	359.3	-142.82	-119.83
Etoposide_AML_control_7_23_65	357.25	0	-1
Etoposide_AML_control_7_23_48	357.25	0	-1
Etoposide_AML_control_4_29_63	356.53	-142.82	-11.27
Etoposide_AML_control_4_29_69	356.53	0	-142.07
Etoposide_AML_control_2_49_95	356.23	0	-150.45
Etoposide_AML_control_2_49_128	356.23	0	-289.88
Etoposide_AML_control_r2_6_92_238	354.8	-142.82	-65.22
Etoposide_AML_control_r2_6_92_194	354.8	0	-334.03
Etoposide_AML_control_r2_6_59_155	354.12	0	-21.07
Etoposide_AML_control_r2_6_59_119	354.12	0	-111.76
Etoposide_AML_control_2_33_86	354.03	-142.82	-177.79
Etoposide_AML_control_2_33_65	354.03	-142.82	-337.97
Etoposide_AML_control_5_51_129	353.47	0	-1
Etoposide_AML_control_5_51_104	353.47	0	-220.17
Etoposide_AML_control_r2_3_65_147	353.3	0	-1
Etoposide_AML_control_r2_3_65_205	353.3	0	-298.39
Etoposide_AML_control_r2_6_24_63	352.24	-142.82	1
Etoposide_AML_control_r2_6_24_48	352.24	0	-121.27
Etoposide_AML_control_r2_6_80_169	351.55	-142.82	-241.39
Etoposide_AML_control_r2_6_80_208	351.55	-142.82	-343.86
Etoposide_AML_control_r2_5_55_115	351.2	0	-245.8
Etoposide_AML_control_r2_5_55_142	351.2	-142.82	-317.37
Etoposide_AML_control_6_18_48	350.41	0	1
Etoposide_AML_control_6_18_42	350.41	-142.82	-335.31
Etoposide_AML_control_2_61_159	349.95	0	-1
Etoposide_AML_control_2_61_122	349.95	0	-1
Etoposide_AML_control_3_16_27	349.37	-142.82	-94.48
Etoposide_AML_control_3_16_40	349.37	0	-362.95
Etoposide_AML_control_r2_8_32_103	349.13	-142.82	-19.91
Etoposide_AML_control_r2_8_32_75	349.13	-142.82	-360.41
Etoposide_AML_control_r2_6_78_202	348.11	-142.82	-8.74
Etoposide_AML_control_r2_6_78_162	348.11	-142.82	-136.58
Etoposide_AML_control_5_51_128	347.3	142.82	398.22
Etoposide_AML_control_5_51_103	347.3	285.64	-1
Etoposide_AML_control_3_82_157	345.97	0	-1
Etoposide_AML_control_3_82_218	345.97	0	-336.33
Etoposide_AML_control_r2_6_95_242	345.38	-142.82	-83.54
Etoposide_AML_control_r2_6_95_201	345.38	-142.82	-356.9
Etoposide_AML_control_r2_1_39_90	345	0	1
Etoposide_AML_control_r2_1_39_138	345	0	-105.91
Etoposide_AML_control_2_55_144	344.53	0	-223.78
Etoposide_AML_control_2_55_109	344.53	0	-321.82
Etoposide_AML_control_r2_8_4_15	342.77	0	-38.03
Etoposide_AML_control_r2_8_4_8	342.77	0	-222.02
Etoposide_AML_control_r2_6_91_236	341.93	-142.82	-3.13
Etoposide_AML_control_r2_6_91_193	341.93	0	-249.66
Etoposide_AML_control_3_51_135	341.4	0	-61.86
Etoposide_AML_control_3_51_98	341.4	0	-125.37
Etoposide_AML_control_r2_3_85_263	341	0	1
Etoposide_AML_control_r2_3_85_197	341	0	-1
Etoposide_AML_control_7_65_186	339.93	-142.82	-31.82
Etoposide_AML_control_7_65_132	339.93	0	-216.51
Etoposide_AML_control_3_93_180	339.82	0	1
Etoposide_AML_control_3_93_247	339.82	0	-1
Etoposide_AML_control_4_28_66	339.35	-142.82	-1
Etoposide_AML_control_4_28_60	339.35	-142.82	-1
Etoposide_AML_control_r2_5_22_51	339.25	0	-54.94
Etoposide_AML_control_r2_5_22_64	339.25	-142.82	-151.74
Etoposide_AML_control_r2_2_79_174	338.9	0	-109.8
Etoposide_AML_control_r2_2_79_237	338.9	0	-348.22
Etoposide_AML_control_4_38_87	338.87	-142.82	-1
Etoposide_AML_control_4_38_81	338.87	0	-1
Etoposide_AML_control_r2_4_98_243	338.77	-142.82	-302.59
Etoposide_AML_control_r2_4_98_213	338.77	-142.82	-375.88
Etoposide_AML_control_r2_3_74_168	338.41	-142.82	-151.76
Etoposide_AML_control_r2_3_74_227	338.41	-142.82	-323.92
Etoposide_AML_control_5_14_30	338.1	0	-4.83
Etoposide_AML_control_5_14_36	338.1	0	-328.79
Etoposide_AML_control_r2_6_16_44	338.05	-142.82	-1
Etoposide_AML_control_r2_6_16_33	338.05	-142.82	-1
Etoposide_AML_control_r2_4_74_186	336.89	0	-1
Etoposide_AML_control_r2_4_74_162	336.89	0	-1
Etoposide_AML_control_6_68_168	335.66	0	-36.22
Etoposide_AML_control_6_68_138	335.66	0	-240.7
Etoposide_AML_control_r2_2_96_202	334.78	0	-349.58
Etoposide_AML_control_r2_2_96_270	334.78	-142.82	-357.07
Etoposide_AML_control_r2_4_87_188	334.45	-142.82	-32.29
Etoposide_AML_control_r2_4_87_217	334.45	0	-226.3
Etoposide_AML_control_r2_2_9_17	333.19	-142.82	-51.34
Etoposide_AML_control_r2_2_9_23	333.19	-142.82	-328.78
Etoposide_AML_control_4_51_104	333.05	-142.82	-263.63
Etoposide_AML_control_4_51_116	333.05	-142.82	-338.04
Etoposide_AML_control_5_21_54	332.63	-142.82	-260.54
Etoposide_AML_control_5_21_42	332.63	0	-337.03
Etoposide_AML_control_r2_3_63_201	332.27	0	-180.26
Etoposide_AML_control_r2_3_63_143	332.27	-142.82	-362.62
Etoposide_AML_control_r2_6_33_65	331.88	0	-193.17
Etoposide_AML_control_r2_6_33_85	331.88	-142.82	-367.31
Etoposide_AML_control_1_61_171	329.21	0	-86.55
Etoposide_AML_control_1_61_122	329.21	0	-285.62
Etoposide_AML_control_5_29_55	329.17	-142.82	-199.14
Etoposide_AML_control_5_29_71	329.17	-142.82	-357.97
Etoposide_AML_control_5_55_136	328.62	0	-196.42
Etoposide_AML_control_5_55_112	328.62	0	-328.18
Etoposide_AML_control_4_93_186	327.18	-142.82	-122.2
Etoposide_AML_control_4_93_209	327.18	-142.82	-330.6
Etoposide_AML_control_2_22_42	326.75	-142.82	-5.34
Etoposide_AML_control_2_22_59	326.75	-142.82	-294.96
Etoposide_AML_control_r2_5_89_179	326.41	-142.82	-196.41
Etoposide_AML_control_r2_5_89_223	326.41	-142.82	-272.16
Etoposide_AML_control_r2_4_81_204	325.97	0	-1
Etoposide_AML_control_r2_4_81_176	325.97	-142.82	-39.37
Etoposide_AML_control_r2_5_4_12	325.94	-142.82	-224.16
Etoposide_AML_control_r2_5_4_16	325.94	-142.82	-251.37
Etoposide_AML_control_6_92_225	324.97	0	-186.3
Etoposide_AML_control_6_92_187	324.97	-142.82	-367.25
Etoposide_AML_control_r2_6_41_84	324.77	-142.82	-8.76
Etoposide_AML_control_r2_6_41_107	324.77	0	-293.58
Etoposide_AML_control_2_52_136	324.47	-142.82	-29.4
Etoposide_AML_control_2_52_103	324.47	0	-138.03
Etoposide_AML_control_r2_7_94_299	323.8	-142.82	-1
Etoposide_AML_control_r2_7_94_192	323.8	-142.82	-1
Etoposide_AML_control_6_85_208	323.65	0	-257.68
Etoposide_AML_control_6_85_174	323.65	-142.82	-391.25
Etoposide_AML_control_4_50_114	323.47	0	-283.46
Etoposide_AML_control_4_50_102	323.47	0	-348.33
Etoposide_AML_control_2_59_118	323.42	-142.82	-122.3
Etoposide_AML_control_2_59_152	323.42	-142.82	-343.77
Etoposide_AML_control_1_64_180	323.3	-142.82	-335.78
Etoposide_AML_control_1_64_128	323.3	-142.82	-391.79
Etoposide_AML_control_5_33_66	323.24	-142.82	-61.73
Etoposide_AML_control_5_33_83	323.24	-142.82	-262.16
Etoposide_AML_control_r2_9_86_281	323.04	-142.82	-192.99
Etoposide_AML_control_r2_9_86_186	323.04	-142.82	-294.25
Etoposide_AML_control_7_16_43	322.21	0	-1
Etoposide_AML_control_7_16_34	322.21	-142.82	-1
Etoposide_AML_control_3_62_120	321.02	-142.82	-86.13
Etoposide_AML_control_3_62_167	321.02	-142.82	-281.01
Etoposide_AML_control_2_13_36	320.64	-142.82	-176.26
Etoposide_AML_control_2_13_26	320.64	-142.82	-275.28
Etoposide_AML_control_r2_4_45_103	320	-142.82	-223.39
Etoposide_AML_control_r2_4_45_117	320	-142.82	-371.82
Etoposide_AML_control_r2_4_4_9	319.27	-142.82	-70.59
Etoposide_AML_control_r2_4_4_8	319.27	-142.82	-316.62
Etoposide_AML_control_6_75_153	319.07	0	1
Etoposide_AML_control_6_75_184	319.07	0	-68.91
Etoposide_AML_control_r2_6_65_173	319	-142.82	-26.25
Etoposide_AML_control_r2_6_65_134	319	-142.82	-322.85
Etoposide_AML_control_r2_3_86_265	318.82	-142.82	-1
Etoposide_AML_control_r2_3_86_198	318.82	-142.82	-51.15
Etoposide_AML_control_5_34_68	317.84	-142.82	-211.95
Etoposide_AML_control_5_34_86	317.84	-142.82	-306.47
Etoposide_AML_control_r2_8_69_221	317.72	0	-1
Etoposide_AML_control_r2_8_69_157	317.72	0	-1
Etoposide_AML_control_1_84_168	317.51	-428.46	-102.18
Etoposide_AML_control_1_84_234	317.51	0	-347.26
Etoposide_AML_control_3_69_180	317.28	0	-150.51
Etoposide_AML_control_3_69_131	317.28	-142.82	-295.67
Etoposide_AML_control_6_87_212	315.26	0	-116.48
Etoposide_AML_control_6_87_177	315.26	0	-186.31
Etoposide_AML_control_4_82_185	315.13	-142.82	-49.62
Etoposide_AML_control_4_82_165	315.13	-142.82	-355.53
Etoposide_AML_control_3_51_136	313.44	0	-226.54
Etoposide_AML_control_3_51_97	313.44	0	-258.36
Etoposide_AML_control_2_65_166	312.09	-142.82	-11.32
Etoposide_AML_control_2_65_129	312.09	-142.82	-187.99
Etoposide_AML_control_r2_6_98_248	311.98	-142.82	-1
Etoposide_AML_control_r2_6_98_206	311.98	0	-1
Etoposide_AML_control_1_91_251	311.51	0	-121.59
Etoposide_AML_control_1_91_181	311.51	0	-138.35
Etoposide_AML_control_5_75_186	310.46	-142.82	-358.94
Etoposide_AML_control_5_75_153	310.46	-142.82	-370.39
Etoposide_AML_control_7_38_109	309.96	0	-257.48
Etoposide_AML_control_7_38_78	309.96	0	-333.87
Etoposide_AML_control_r2_2_79_238	309.46	-142.82	-0.53
Etoposide_AML_control_r2_2_79_173	309.46	-142.82	-104.53
Etoposide_AML_control_4_9_21	307.92	0	-99.2
Etoposide_AML_control_4_9_23	307.92	0	-114.71
Etoposide_AML_control_r2_1_30_73	307.49	0	-49.21
Etoposide_AML_control_r2_1_30_113	307.49	0	-87.93
Etoposide_AML_control_6_62_125	307.36	-142.82	-74.06
Etoposide_AML_control_6_62_151	307.36	0	-220.16
Etoposide_AML_control_1_50_138	307.27	-142.82	-1
Etoposide_AML_control_1_50_100	307.27	0	-1
Etoposide_AML_control_r2_7_34_73	307.15	0	-194.13
Etoposide_AML_control_r2_7_34_120	307.15	0	-302.91
Etoposide_AML_control_r2_6_81_210	307.14	0	-1
Etoposide_AML_control_r2_6_81_171	307.14	0	-1
Etoposide_AML_control_4_5_13	306.94	0	-265.73
Etoposide_AML_control_4_5_13	306.94	0	-403.84
Etoposide_AML_control_7_90_252	306.39	0	-266.36
Etoposide_AML_control_7_90_186	306.39	0	-294.79
Etoposide_AML_control_7_75_212	305.84	0	-75.39
Etoposide_AML_control_7_75_154	305.84	-142.82	-182.91
Etoposide_AML_control_r2_2_48_141	305.07	0	-143.31
Etoposide_AML_control_r2_2_48_108	305.07	-142.82	-171.95
Etoposide_AML_control_3_25_40	304.57	0	-131.53
Etoposide_AML_control_3_25_64	304.57	0	-138.77
Etoposide_AML_control_1_89_177	304.47	0	-217.57
Etoposide_AML_control_1_89_246	304.47	0	-283.43
Etoposide_AML_control_4_51_115	303.37	-142.82	-11.57
Etoposide_AML_control_4_51_105	303.37	0	-331.85
Etoposide_AML_control_4_79_177	303.36	0	-1
Etoposide_AML_control_4_79_160	303.36	-142.82	-110.63
Etoposide_AML_control_r2_5_75_191	302.94	0	-54.87
Etoposide_AML_control_r2_5_75_153	302.94	0	-299.87
Etoposide_AML_control_7_78_220	302.48	-142.82	-224.73
Etoposide_AML_control_7_78_162	302.48	0	-297.51
Etoposide_AML_control_r2_4_28_72	301.99	0	-1
Etoposide_AML_control_r2_4_28_65	301.99	0	-1
Etoposide_AML_control_r2_5_97_193	301.72	-142.82	-297.93
Etoposide_AML_control_r2_5_97_241	301.72	-142.82	-352.34
Etoposide_AML_control_5_38_97	301.21	-142.82	-1
Etoposide_AML_control_5_38_76	301.21	-142.82	-228.18
Etoposide_AML_control_2_72_144	300.94	0	1
Etoposide_AML_control_2_72_185	300.94	0	-307.28
Etoposide_AML_control_r2_5_42_113	300.09	-142.82	-32.68
Etoposide_AML_control_r2_5_42_91	300.09	-142.82	-224.3
Etoposide_AML_control_r2_4_28_73	299.62	-142.82	-1
Etoposide_AML_control_r2_4_28_66	299.62	-142.82	-1
Etoposide_AML_control_r2_4_54_137	299.17	0	-108.32
Etoposide_AML_control_r2_4_54_122	299.17	0	-186.27
Etoposide_AML_control_6_55_135	298.93	-142.82	-181.64
Etoposide_AML_control_6_55_113	298.93	-142.82	-213.78
Etoposide_AML_control_3_27_67	298.74	-142.82	-160.35
Etoposide_AML_control_3_27_43	298.74	-142.82	-212.51
Etoposide_AML_control_6_10_25	298.6	-142.82	-78.46
Etoposide_AML_control_6_10_24	298.6	0	-133.08
Etoposide_AML_control_r2_3_95_285	298.28	-142.82	-1
Etoposide_AML_control_r2_3_95_214	298.28	-142.82	-1
Etoposide_AML_control_r2_4_25_55	298.24	-142.82	-244.12
Etoposide_AML_control_r2_4_25_64	298.24	0	-331.58
Etoposide_AML_control_r2_3_9_20	297.55	-285.64	-112.04
Etoposide_AML_control_r2_3_9_25	297.55	-428.46	-120.67
Etoposide_AML_control_r2_4_32_83	297.02	-142.82	-48.83
Etoposide_AML_control_r2_4_32_74	297.02	-142.82	-328.02
Etoposide_AML_control_r2_4_25_54	296.53	0	-95.19
Etoposide_AML_control_r2_4_25_63	296.53	0	-248.79
Etoposide_AML_control_5_91_225	296.17	-142.82	-1
Etoposide_AML_control_5_91_187	296.17	-142.82	-1
Etoposide_AML_control_5_88_179	295.95	0	-42.19
Etoposide_AML_control_5_88_217	295.95	0	-210.22
Etoposide_AML_control_r2_4_37_96	295.9	-142.82	-1
Etoposide_AML_control_r2_4_37_87	295.9	-142.82	-321.63
Etoposide_AML_control_r2_4_40_105	295.28	-285.64	-1
Etoposide_AML_control_r2_4_40_93	295.28	-285.64	-1
Etoposide_AML_control_r2_5_95_189	294.91	0	-85.57
Etoposide_AML_control_r2_5_95_236	294.91	-142.82	-194.74
Etoposide_AML_control_2_52_104	294.42	-142.82	-37.79
Etoposide_AML_control_2_52_137	294.42	-142.82	-70.55
Etoposide_AML_control_r2_5_74_190	293.82	-142.82	-23.4
Etoposide_AML_control_r2_5_74_152	293.82	0	-260.37
Etoposide_AML_control_2_76_195	293.81	0	-1
Etoposide_AML_control_2_76_151	293.81	0	-1
Etoposide_AML_control_r2_5_48_128	292.65	0	1
Etoposide_AML_control_r2_5_48_103	292.65	-142.82	-165.02
Etoposide_AML_control_3_87_232	291.54	-142.82	-1
Etoposide_AML_control_3_87_168	291.54	0	-1
Etoposide_AML_control_7_62_128	290.38	0	-1
Etoposide_AML_control_7_62_179	290.38	0	-124.52
Etoposide_AML_control_7_75_153	290.33	0	-114.18
Etoposide_AML_control_7_75_211	290.33	-142.82	-267.65
Etoposide_AML_control_5_64_160	289.92	-142.82	-98.85
Etoposide_AML_control_5_64_130	289.92	-142.82	-181.83
Etoposide_AML_control_2_30_77	289.55	-142.82	-1
Etoposide_AML_control_2_30_58	289.55	0	-1
Etoposide_AML_control_r2_6_22_43	289.41	-142.82	-267.98
Etoposide_AML_control_r2_6_22_58	289.41	-142.82	-291
Etoposide_AML_control_7_84_173	289.32	-142.82	-221.26
Etoposide_AML_control_7_84_234	289.32	-142.82	-357.67
Etoposide_AML_control_6_41_105	289.18	0	-1
Etoposide_AML_control_6_41_84	289.18	0	-1
Etoposide_AML_control_r2_8_4_14	288.8	0	-54.39
Etoposide_AML_control_r2_8_4_7	288.8	-142.82	-205.16
Etoposide_AML_control_5_55_137	288.63	-142.82	-255.93
Etoposide_AML_control_5_55_111	288.63	-142.82	-285.5
Etoposide_AML_control_r2_4_17_38	288.35	-142.82	-121.37
Etoposide_AML_control_r2_4_17_44	288.35	0	-128.11
Etoposide_AML_control_4_57_116	288.24	-142.82	-9.97
Etoposide_AML_control_4_57_130	288.24	-142.82	-234.53
Etoposide_AML_control_r2_5_18_56	287.69	-142.82	-1
Etoposide_AML_control_r2_5_18_42	287.69	0	-1
Etoposide_AML_control_r2_2_60_175	287.24	-142.82	-245.56
Etoposide_AML_control_r2_2_60_131	287.24	-142.82	-246.86
Etoposide_AML_control_4_57_129	286.14	0	-307.48
Etoposide_AML_control_4_57_117	286.14	0	-390.21
Etoposide_AML_control_r2_5_63_163	286.09	0	-93.74
Etoposide_AML_control_r2_5_63_132	286.09	0	-286.95
Etoposide_AML_control_r2_3_81_187	285.51	0	-52.17
Etoposide_AML_control_r2_3_81_250	285.51	-428.46	-97.17
Etoposide_AML_control_r2_8_56_184	285.06	0	-213.77
Etoposide_AML_control_r2_8_56_128	285.06	-142.82	-319.94
Etoposide_AML_control_4_76_171	284.69	0	-8.37
Etoposide_AML_control_4_76_154	284.69	0	-16.98
Etoposide_AML_control_r2_7_42_144	283.95	0	-47.49
Etoposide_AML_control_r2_7_42_88	283.95	0	-324.59
Etoposide_AML_control_r2_2_20_44	282.23	0	-247.52
Etoposide_AML_control_r2_2_20_58	282.23	0	-363.45
Etoposide_AML_control_7_12_24	281.78	-142.82	-63.56
Etoposide_AML_control_7_12_33	281.78	-142.82	-279.67
Etoposide_AML_control_4_92_207	281.52	0	-1
Etoposide_AML_control_4_92_183	281.52	0	-1
Etoposide_AML_control_2_58_150	281.25	-428.46	1
Etoposide_AML_control_2_58_115	281.25	0	-34.91
Etoposide_AML_control_2_48_93	280.59	0	-1
Etoposide_AML_control_2_48_126	280.59	0	-80.29
Etoposide_AML_control_6_17_41	280.39	-142.82	-299.2
Etoposide_AML_control_6_17_46	280.39	0	-310.42
Etoposide_AML_control_r2_5_91_226	280.28	-142.82	-1
Etoposide_AML_control_r2_5_91_181	280.28	0	-1
Etoposide_AML_control_r2_4_61_153	279.9	-142.82	-4.99
Etoposide_AML_control_r2_4_61_137	279.9	0	-260.51
Etoposide_AML_control_r2_4_98_212	279.69	-142.82	-33.72
Etoposide_AML_control_r2_4_98_242	279.69	0	-137.8
Etoposide_AML_control_r2_4_13_34	279.42	-142.82	-1
Etoposide_AML_control_r2_4_13_29	279.42	-142.82	-1
Etoposide_AML_control_r2_3_49_112	278.89	-142.82	-265.57
Etoposide_AML_control_r2_3_49_156	278.89	-142.82	-273.82
Etoposide_AML_control_6_83_204	278.83	0	-1
Etoposide_AML_control_6_83_169	278.83	0	-213.63
Etoposide_AML_control_r2_4_6_13	277.93	0	-212
Etoposide_AML_control_r2_4_6_13	277.93	0	-321.13
Etoposide_AML_control_6_54_110	277.85	0	-205.33
Etoposide_AML_control_6_54_133	277.85	-142.82	-382.12
Etoposide_AML_control_3_91_175	277.77	-285.64	-184.21
Etoposide_AML_control_3_91_242	277.77	-142.82	-310.8
Etoposide_AML_control_1_96_264	277.73	0	-1
Etoposide_AML_control_1_96_191	277.73	-142.82	-1
Etoposide_AML_control_4_13_30	277.42	-142.82	-39.7
Etoposide_AML_control_4_13_29	277.42	-142.82	-78.45
Etoposide_AML_control_r2_3_86_264	277.4	-142.82	-1
Etoposide_AML_control_r2_3_86_199	277.4	0	-1
Etoposide_AML_control_r2_3_88_270	277.31	0	-101.53
Etoposide_AML_control_r2_3_88_202	277.31	-142.82	-305.9
Etoposide_AML_control_r2_4_29_74	277.27	-142.82	-3.98
Etoposide_AML_control_r2_4_29_67	277.27	-142.82	-220.22
Etoposide_AML_control_5_1_2	276.86	-142.82	-81.87
Etoposide_AML_control_5_1_3	276.86	-142.82	-165.49
Etoposide_AML_control_r2_5_74_189	276.62	0	-325.07
Etoposide_AML_control_r2_5_74_151	276.62	0	-358.32
Etoposide_AML_control_r2_4_2_4	275.66	0	-141.94
Etoposide_AML_control_r2_4_2_6	275.66	-428.46	-285.42
Etoposide_AML_control_7_57_163	275.27	-142.82	-1
Etoposide_AML_control_7_57_117	275.27	0	-1
Etoposide_AML_control_4_71_144	274.92	-142.82	-92.64
Etoposide_AML_control_4_71_161	274.92	0	-135.83
Etoposide_AML_control_2_56_146	274.66	0	-12.79
Etoposide_AML_control_2_56_111	274.66	-428.46	-106.1
Etoposide_AML_control_r2_4_91_196	274.43	0	-92.29
Etoposide_AML_control_r2_4_91_224	274.43	0	-330.39
Etoposide_AML_control_r2_4_62_138	273.89	-142.82	-1
Etoposide_AML_control_r2_4_62_154	273.89	-142.82	-228.48
Etoposide_AML_control_r2_4_17_39	273.81	428.46	152.09
Etoposide_AML_control_r2_4_17_43	273.81	-428.46	-237.98
Etoposide_AML_control_4_48_98	273.25	0	-315.4
Etoposide_AML_control_4_48_108	273.25	0	-336.45
Etoposide_AML_control_r2_7_68_227	272.84	0	-116.34
Etoposide_AML_control_r2_7_68_141	272.84	0	-202.85
Etoposide_AML_control_r2_3_83_257	272.46	-142.82	-1
Etoposide_AML_control_r2_3_83_191	272.46	-142.82	-163.84
Etoposide_AML_control_r2_6_52_104	272.36	0	-293.03
Etoposide_AML_control_r2_6_52_133	272.36	0	-342.71
Etoposide_AML_control_5_91_224	272.28	0	-1
Etoposide_AML_control_5_91_186	272.28	-142.82	-1
Etoposide_AML_control_r2_4_45_116	272.1	-142.82	-0.1
Etoposide_AML_control_r2_4_45_102	272.1	-142.82	-148.98
Etoposide_AML_control_r2_2_28_82	272.04	-142.82	-1
Etoposide_AML_control_r2_2_28_61	272.04	-142.82	-1
Etoposide_AML_control_5_50_101	271.75	-142.82	-52.92
Etoposide_AML_control_5_50_127	271.75	0	-55.66
Etoposide_AML_control_5_71_176	271.6	0	-225.38
Etoposide_AML_control_5_71_144	271.6	0	-353.69
Etoposide_AML_control_r2_6_69_143	271.58	0	-44.16
Etoposide_AML_control_r2_6_69_182	271.58	0	-152.1
Etoposide_AML_control_r2_6_91_192	271.38	-142.82	-50.55
Etoposide_AML_control_r2_6_91_235	271.38	0	-100.65
Etoposide_AML_control_r2_6_95_243	270.28	-142.82	-233.4
Etoposide_AML_control_r2_6_95_200	270.28	-142.82	-333.96
Etoposide_AML_control_r2_2_19_42	270.24	0	-129.09
Etoposide_AML_control_r2_2_19_56	270.24	0	-219.07
Etoposide_AML_control_r2_5_30_82	270.23	0	-4.88
Etoposide_AML_control_r2_5_30_66	270.23	0	-143.28
Etoposide_AML_control_4_55_113	269.76	0	-60.94
Etoposide_AML_control_4_55_125	269.76	0	-305.99
Etoposide_AML_control_2_94_244	269.54	0	-52.52
Etoposide_AML_control_2_94_188	269.54	-142.82	-142.57
Etoposide_AML_control_4_23_55	269.49	-142.82	-76.19
Etoposide_AML_control_4_23_50	269.49	-142.82	-326.13
Etoposide_AML_control_r2_3_56_182	269.04	-142.82	-118.38
Etoposide_AML_control_r2_3_56_129	269.04	-142.82	-141.21
Etoposide_AML_control_2_86_224	268.89	-142.82	1
Etoposide_AML_control_2_86_172	268.89	-428.46	-240.45
Etoposide_AML_control_5_85_173	268.71	-142.82	-57.32
Etoposide_AML_control_5_85_210	268.71	-142.82	-222.94
Etoposide_AML_control_6_67_166	268.7	-142.82	-5.46
Etoposide_AML_control_6_67_137	268.7	-142.82	-242.04
Etoposide_AML_control_2_55_108	268.68	-142.82	-119.6
Etoposide_AML_control_2_55_143	268.68	-142.82	-201.86
Etoposide_AML_control_5_75_187	268.62	0	-276.17
Etoposide_AML_control_5_75_154	268.62	0	-283.49
Etoposide_AML_control_5_5_14	268.56	0	-307.28
Etoposide_AML_control_5_5_16	268.56	0	-342.62
Etoposide_AML_control_r2_8_98_214	267.78	0	-198.03
Etoposide_AML_control_r2_8_98_296	267.78	0	-235.79
Etoposide_AML_control_r2_3_9_21	267.57	-142.82	-141.88
Etoposide_AML_control_r2_3_9_24	267.57	-142.82	-283.53
Etoposide_AML_control_6_7_17	267.16	-142.82	-1
Etoposide_AML_control_6_7_18	267.16	-142.82	-1
Etoposide_AML_control_5_94_192	267.03	-142.82	-304.03
Etoposide_AML_control_5_94_230	267.03	-142.82	-363.69
Etoposide_AML_control_5_81_204	266.61	0	-220.74
Etoposide_AML_control_5_81_165	266.61	0	-351.96
Etoposide_AML_control_r2_8_94_288	266.35	0	1
Etoposide_AML_control_r2_8_94_207	266.35	0	1
Etoposide_AML_control_5_54_134	265.94	-142.82	-144.71
Etoposide_AML_control_5_54_109	265.94	-142.82	-403.13
Etoposide_AML_control_7_16_33	264.96	-142.82	-166.51
Etoposide_AML_control_7_16_44	264.96	-142.82	-415.1
Etoposide_AML_control_r2_4_90_222	264.83	0	-71.36
Etoposide_AML_control_r2_4_90_193	264.83	-142.82	-87.49
Etoposide_AML_control_1_84_233	264.48	0	-84.72
Etoposide_AML_control_1_84_167	264.48	-142.82	-288.4
Etoposide_AML_control_r2_5_77_157	264.39	285.64	218.83
Etoposide_AML_control_r2_5_77_196	264.39	0	-1
Etoposide_AML_control_r2_5_17_54	264.39	-142.82	-247.16
Etoposide_AML_control_r2_5_17_40	264.39	-142.82	-328.25
Etoposide_AML_control_5_39_98	264.1	0	-321.64
Etoposide_AML_control_5_39_77	264.1	0	-343.36
Etoposide_AML_control_1_77_218	263.98	-142.82	-199.43
Etoposide_AML_control_1_77_155	263.98	-142.82	-326.98
Etoposide_AML_control_r2_4_72_183	262.95	-142.82	-2.16
Etoposide_AML_control_r2_4_72_158	262.95	0	-211.22
Etoposide_AML_control_4_5_12	262.36	-142.82	-25.34
Etoposide_AML_control_4_5_14	262.36	-142.82	-177.92
Etoposide_AML_control_r2_9_54_183	262.36	-428.46	-106.4
Etoposide_AML_control_r2_9_54_119	262.36	-428.46	-154.22
Etoposide_AML_control_r2_7_73_239	262.13	0	-280.25
Etoposide_AML_control_r2_7_73_150	262.13	0	-364.33
Etoposide_AML_control_r2_7_75_155	261.99	-142.82	-17.38
Etoposide_AML_control_r2_7_75_244	261.99	0	-78.4
Etoposide_AML_control_7_90_251	261.9	0	-1
Etoposide_AML_control_7_90_185	261.9	0	-135.05
Etoposide_AML_control_5_88_216	261.85	0	-287.12
Etoposide_AML_control_5_88_178	261.85	0	-396.28
Etoposide_AML_control_3_93_179	261.83	0	-162.45
Etoposide_AML_control_3_93_248	261.83	0	-206.34
Etoposide_AML_control_r2_5_82_166	261.79	-142.82	-261.42
Etoposide_AML_control_r2_5_82_209	261.79	-142.82	-274.93
Etoposide_AML_control_3_50_134	261.29	0	-248.38
Etoposide_AML_control_3_50_96	261.29	0	-276.65
Etoposide_AML_control_2_64_127	261.01	0	1
Etoposide_AML_control_2_64_164	261.01	-142.82	-219.14
Etoposide_AML_control_r2_8_53_121	260.55	-142.82	-143.21
Etoposide_AML_control_r2_8_53_175	260.55	0	-249.33
Etoposide_AML_control_5_71_177	260.02	0	-229.03
Etoposide_AML_control_5_71_145	260.02	0	-324.38
Etoposide_AML_control_4_76_155	259.73	-142.82	-307.53
Etoposide_AML_control_4_76_172	259.73	-142.82	-321.01
Etoposide_AML_control_r2_3_35_115	259.64	0	-57.16
Etoposide_AML_control_r2_3_35_84	259.64	-142.82	-277.12
Etoposide_AML_control_5_0_1	259.59	-142.82	-145.42
Etoposide_AML_control_5_0_0	259.59	-142.82	-383.29
Etoposide_AML_control_4_10_24	259.57	-142.82	-1
Etoposide_AML_control_4_10_24	259.57	-142.82	-1
Etoposide_AML_control_r2_6_78_201	258.59	0	1
Etoposide_AML_control_r2_6_78_163	258.59	0	-17.84
Etoposide_AML_control_1_40_110	258.25	-142.82	-1
Etoposide_AML_control_1_40_77	258.25	-142.82	-1
Etoposide_AML_control_4_34_78	257.97	-142.82	-376.7
Etoposide_AML_control_4_34_72	257.97	-142.82	-397.64
Etoposide_AML_control_1_9_22	257.85	-142.82	-21.85
Etoposide_AML_control_1_9_16	257.85	0	-326.02
Etoposide_AML_control_2_14_39	257.58	-142.82	-43.74
Etoposide_AML_control_2_14_28	257.58	0	-150.37
Etoposide_AML_control_5_89_181	256.95	0	-153.79
Etoposide_AML_control_5_89_219	256.95	0	-389.36
Etoposide_AML_control_4_96_214	256.72	-142.82	-28.72
Etoposide_AML_control_4_96_192	256.72	-142.82	-206.57
Etoposide_AML_control_r2_8_98_215	256.55	-142.82	-279.84
Etoposide_AML_control_r2_8_98_297	256.55	-142.82	-295.53
Etoposide_AML_control_5_85_172	256.54	0	-247.15
Etoposide_AML_control_5_85_211	256.54	0	-256.96
Etoposide_AML_control_r2_7_80_165	256.39	0	-232.28
Etoposide_AML_control_r2_7_80_259	256.39	0	-338.6
Etoposide_AML_control_r2_6_9_19	256.37	-142.82	-1
Etoposide_AML_control_r2_6_9_25	256.37	-142.82	-330.36
Etoposide_AML_control_2_17_33	256.34	-142.82	-92.94
Etoposide_AML_control_2_17_46	256.34	-142.82	-334.97
Etoposide_AML_control_1_96_265	255.54	-428.46	-1
Etoposide_AML_control_1_96_192	255.54	0	-1
Etoposide_AML_control_2_30_76	255.27	0	-1
Etoposide_AML_control_2_30_57	255.27	-142.82	-31.57
Etoposide_AML_control_r2_8_94_287	255	-142.82	-5.38
Etoposide_AML_control_r2_8_94_208	255	0	-156.13
Etoposide_AML_control_r2_4_70_179	254.78	-142.82	-212.8
Etoposide_AML_control_r2_4_70_155	254.78	-142.82	-267.51
Etoposide_AML_control_6_66_164	254.55	0	-6.25
Etoposide_AML_control_6_66_135	254.55	0	-54.39
Etoposide_AML_control_5_53_132	254.48	0	-290.24
Etoposide_AML_control_5_53_108	254.48	-142.82	-327.95
Etoposide_AML_control_5_92_189	253.39	-142.82	-215.68
Etoposide_AML_control_5_92_226	253.39	-142.82	-373.99
Etoposide_AML_control_r2_5_44_117	253.3	-142.82	-183.36
Etoposide_AML_control_r2_5_44_94	253.3	-142.82	-325.37
Etoposide_AML_control_r2_4_91_195	253.12	-142.82	-122.82
Etoposide_AML_control_r2_4_91_225	253.12	-142.82	-241.39
Etoposide_AML_control_7_34_98	252.47	0	-29.41
Etoposide_AML_control_7_34_70	252.47	0	-53.37
Etoposide_AML_control_r2_5_14_45	252.28	-142.82	-1
Etoposide_AML_control_r2_5_14_35	252.28	-142.82	-1
Etoposide_AML_control_r2_8_62_200	252.22	0	-239.5
Etoposide_AML_control_r2_8_62_140	252.22	0	-275.31
Etoposide_AML_control_3_70_182	251.97	-142.82	-16.24
Etoposide_AML_control_3_70_133	251.97	-142.82	-127.64
Etoposide_AML_control_r2_2_40_89	251.86	-142.82	-257.02
Etoposide_AML_control_r2_2_40_119	251.86	-142.82	-334.39
Etoposide_AML_control_7_5_14	251.65	-142.82	-1
Etoposide_AML_control_7_5_10	251.65	-142.82	-1
Etoposide_AML_control_1_97_267	250.86	-142.82	-89.21
Etoposide_AML_control_1_97_194	250.86	0	-133.84
Etoposide_AML_control_r2_5_27_61	250.68	-142.82	-330.46
Etoposide_AML_control_r2_5_27_76	250.68	-142.82	-351.41
Etoposide_AML_control_4_40_90	250.55	-142.82	-9.02
Etoposide_AML_control_4_40_84	250.55	-142.82	-240.18
Etoposide_AML_control_7_62_178	250.43	-142.82	-257.58
Etoposide_AML_control_7_62_127	250.43	-142.82	-347.95
Etoposide_AML_control_4_11_26	250.11	0	-343.57
Etoposide_AML_control_4_11_27	250.11	-142.82	-382.49
Etoposide_AML_control_6_77_187	249.99	-142.82	-154.48
Etoposide_AML_control_6_77_156	249.99	-142.82	-365.95
Etoposide_AML_control_r2_2_39_117	249.89	0	-1
Etoposide_AML_control_r2_2_39_88	249.89	0	-1
Etoposide_AML_control_2_72_143	249.47	0	-96.96
Etoposide_AML_control_2_72_184	249.47	0	-213.98
Etoposide_AML_control_r2_6_87_182	249.43	-142.82	-305.87
Etoposide_AML_control_r2_6_87_225	249.43	-142.82	-366.63
Etoposide_AML_control_7_95_198	249	0	-1
Etoposide_AML_control_7_95_266	249	0	-446.93
Etoposide_AML_control_2_23_61	248.86	0	-21.42
Etoposide_AML_control_2_23_45	248.86	0	-192.52
Etoposide_AML_control_r2_6_26_51	248.58	-142.82	-265.36
Etoposide_AML_control_r2_6_26_66	248.58	0	-360.26
Etoposide_AML_control_1_30_86	247.76	-142.82	-321.27
Etoposide_AML_control_1_30_57	247.76	-142.82	-413.8
Etoposide_AML_control_r2_2_60_132	247.7	0	-35.99
Etoposide_AML_control_r2_2_60_174	247.7	-142.82	-201.12
Etoposide_AML_control_6_84_172	247.62	-142.82	-286.5
Etoposide_AML_control_6_84_207	247.62	-142.82	-292.29
Etoposide_AML_control_r2_6_1_4	247.45	-142.82	-1
Etoposide_AML_control_r2_6_1_4	247.45	-142.82	-1
Etoposide_AML_control_4_8_20	247.19	-142.82	-123.66
Etoposide_AML_control_4_8_20	247.19	-142.82	-187.22
Etoposide_AML_control_5_94_231	246.99	0	-97.26
Etoposide_AML_control_5_94_193	246.99	0	-238.67
Etoposide_AML_control_2_61_158	246.73	-142.82	-1
Etoposide_AML_control_2_61_121	246.73	0	-1
Etoposide_AML_control_1_64_181	245.99	0	1
Etoposide_AML_control_1_64_127	245.99	-142.82	-374.25
Etoposide_AML_control_7_65_185	245.38	0	-328.33
Etoposide_AML_control_7_65_133	245.38	0	-410.13
Etoposide_AML_control_r2_4_76_192	245.37	-142.82	-1
Etoposide_AML_control_r2_4_76_167	245.37	-142.82	-1
Etoposide_AML_control_r2_5_81_164	245.12	-142.82	-227.21
Etoposide_AML_control_r2_5_81_207	245.12	-142.82	-292.06
Etoposide_AML_control_6_61_150	244.42	0	-1
Etoposide_AML_control_6_61_123	244.42	-142.82	-1
Etoposide_AML_control_4_31_73	244.13	-142.82	-1
Etoposide_AML_control_4_31_66	244.13	0	-50.6
Etoposide_AML_control_2_29_56	243.04	-142.82	-337.67
Etoposide_AML_control_2_29_74	243.04	-142.82	-350.84
Etoposide_AML_control_r2_9_58_198	242.45	-142.82	-206.22
Etoposide_AML_control_r2_9_58_127	242.45	0	-380.69
Etoposide_AML_control_3_14_34	242.42	0	-1
Etoposide_AML_control_3_14_22	242.42	0	-1
Etoposide_AML_control_1_78_220	242.33	0	-1
Etoposide_AML_control_1_78_157	242.33	-142.82	-1
Etoposide_AML_control_r2_3_88_269	241.98	0	-234.92
Etoposide_AML_control_r2_3_88_203	241.98	0	-300.64
Etoposide_AML_control_4_70_142	241.75	-142.82	-282.94
Etoposide_AML_control_4_70_158	241.75	-142.82	-353.35
Etoposide_AML_control_5_62_154	241.55	-142.82	-287.94
Etoposide_AML_control_5_62_126	241.55	-142.82	-377.53
Etoposide_AML_control_3_42_75	241.18	428.46	418.9
Etoposide_AML_control_3_42_110	241.18	0	-342.58
Etoposide_AML_control_r2_5_71_148	240.08	-142.82	-35.48
Etoposide_AML_control_r2_5_71_185	240.08	-142.82	-174.4
Etoposide_AML_control_5_89_218	239.91	-142.82	-86.1
Etoposide_AML_control_5_89_180	239.91	-142.82	-94.65
Etoposide_AML_control_r2_5_89_224	239.21	-142.82	-1
Etoposide_AML_control_r2_5_89_178	239.21	0	-14.07
Etoposide_AML_control_r2_7_65_219	239.07	0	-353.34
Etoposide_AML_control_r2_7_65_134	239.07	0	-378.86
Etoposide_AML_control_2_26_49	239.04	0	-99.1
Etoposide_AML_control_2_26_69	239.04	0	-287.84
Etoposide_AML_control_1_68_136	238.32	0	-86.92
Etoposide_AML_control_1_68_193	238.32	0	-143.64
Etoposide_AML_control_3_38_67	238.13	0	-244.11
Etoposide_AML_control_3_38_99	238.13	0	-296.43
Etoposide_AML_control_6_55_112	237.88	0	-118.92
Etoposide_AML_control_6_55_136	237.88	0	-327.84
Etoposide_AML_control_r2_8_48_111	237.22	0	-172.62
Etoposide_AML_control_r2_8_48_162	237.22	0	-344.31
Etoposide_AML_control_r2_7_64_132	237.2	0	-156.61
Etoposide_AML_control_r2_7_64_216	237.2	0	-205.9
Etoposide_AML_control_3_60_162	237.17	-142.82	-197.44
Etoposide_AML_control_3_60_115	237.17	-142.82	-360.56
Etoposide_AML_control_r2_6_12_26	236.94	0	1
Etoposide_AML_control_r2_6_12_31	236.94	0	-239.74
Etoposide_AML_control_3_38_98	236.92	-142.82	-249.05
Etoposide_AML_control_3_38_66	236.92	-142.82	-274.48
Etoposide_AML_control_r2_3_81_249	236.48	0	-51.01
Etoposide_AML_control_r2_3_81_186	236.48	0	-182.89
Etoposide_AML_control_5_5_15	236.46	0	-1
Etoposide_AML_control_5_5_13	236.46	0	-1
Etoposide_AML_control_r2_6_58_152	236.43	0	-1
Etoposide_AML_control_r2_6_58_116	236.43	0	-1
Etoposide_AML_control_r2_4_26_65	236.36	-142.82	-227.54
Etoposide_AML_control_r2_4_26_57	236.36	-142.82	-273.58
Etoposide_AML_control_4_10_25	235.89	-142.82	-173.69
Etoposide_AML_control_4_10_23	235.89	0	-203.73
Etoposide_AML_control_6_82_167	235.64	-142.82	-138.2
Etoposide_AML_control_4_44_100	235.64	-142.82	-230.27
Etoposide_AML_control_4_44_92	235.64	-142.82	-334.38
Etoposide_AML_control_6_82_203	235.64	-142.82	-339.79
Etoposide_AML_control_r2_7_91_186	235.59	0	1
Etoposide_AML_control_r2_7_91_292	235.59	0	-359.72
Etoposide_AML_control_r2_9_31_68	235.44	-142.82	-47.62
Etoposide_AML_control_r2_9_31_108	235.44	-142.82	-143.99
Etoposide_AML_control_2_48_125	234.68	-142.82	-26.29
Etoposide_AML_control_2_48_94	234.68	-142.82	-73.66
Etoposide_AML_control_6_70_142	234.46	0	-383.85
Etoposide_AML_control_6_70_172	234.46	0	-384.88
Etoposide_AML_control_r2_3_65_148	234.4	-142.82	-262.07
Etoposide_AML_control_r2_3_65_206	234.4	-142.82	-372.06
Etoposide_AML_control_4_69_141	234.39	-428.46	-156.03
Etoposide_AML_control_4_69_156	234.39	-428.46	-280.45
Etoposide_AML_control_7_49_143	234.08	-142.82	-1
Etoposide_AML_control_7_49_103	234.08	-142.82	-1
Etoposide_AML_control_3_57_155	233.78	-142.82	-30.6
Etoposide_AML_control_3_57_110	233.78	0	-186.19
Etoposide_AML_control_1_74_209	233.49	0	-285.21
Etoposide_AML_control_1_74_149	233.49	0	-400.09
Etoposide_AML_control_3_62_166	233.26	0	-66.75
Etoposide_AML_control_3_62_119	233.26	-142.82	-126.16
Etoposide_AML_control_2_27_71	233.22	0	-367.55
Etoposide_AML_control_2_27_52	233.22	0	-367.95
Etoposide_AML_control_r2_5_7_26	232.9	-142.82	-1
Etoposide_AML_control_r2_5_7_19	232.9	-142.82	-1
Etoposide_AML_control_5_38_96	232.77	-142.82	-1
Etoposide_AML_control_5_38_75	232.77	0	-1
Etoposide_AML_control_r2_1_47_106	232.67	-142.82	-11.22
Etoposide_AML_control_r2_1_47_165	232.67	-142.82	-38.53
Etoposide_AML_control_4_21_50	231.95	0	1
Etoposide_AML_control_4_21_46	231.95	0	-224.99
Etoposide_AML_control_5_21_43	231.25	0	-34.18
Etoposide_AML_control_5_21_55	231.25	0	-179.59
Etoposide_AML_control_r2_9_72_243	229.63	-142.82	-292.42
Etoposide_AML_control_r2_9_72_157	229.63	-142.82	-319.51
Etoposide_AML_control_r2_6_67_176	229.4	-142.82	-319.31
Etoposide_AML_control_r2_6_67_136	229.4	-142.82	-351
Etoposide_AML_control_4_72_146	229.37	-142.82	-245.87
Etoposide_AML_control_4_72_162	229.37	-142.82	-367.66
Etoposide_AML_control_r2_7_42_145	229.15	-142.82	-237.26
Etoposide_AML_control_r2_7_42_89	229.15	-142.82	-332.36
Etoposide_AML_control_4_30_70	228.73	-142.82	1
Etoposide_AML_control_4_30_64	228.73	-142.82	-251.22
Etoposide_AML_control_1_87_174	228.67	0	-351.15
Etoposide_AML_control_1_87_241	228.67	0	-359.16
Etoposide_AML_control_r2_5_45_119	228.42	-142.82	-1
Etoposide_AML_control_r2_5_45_96	228.42	-142.82	-1
Etoposide_AML_control_2_47_92	228.36	-142.82	-113.31
Etoposide_AML_control_2_47_123	228.36	-142.82	-204.96
Etoposide_AML_control_r2_3_68_213	228.17	-142.82	-1
Etoposide_AML_control_r2_3_68_153	228.17	-142.82	-1
Etoposide_AML_control_6_49_102	227.87	-142.82	-302.57
Etoposide_AML_control_6_49_123	227.87	-142.82	-344.67
Etoposide_AML_control_r2_5_41_111	227.67	0	-180.01
Etoposide_AML_control_r2_5_41_90	227.67	-142.82	-310.04
Etoposide_AML_control_r2_1_32_77	227.5	-142.82	-377.49
Etoposide_AML_control_r2_1_32_118	227.5	-142.82	-382.38
Etoposide_AML_control_r2_3_67_210	227.34	-142.82	-52.17
Etoposide_AML_control_r2_3_67_151	227.34	-142.82	-187.55
Etoposide_AML_control_r2_6_88_185	227.11	-142.82	-62.32
Etoposide_AML_control_r2_6_88_227	227.11	-142.82	-117.03
Etoposide_AML_control_r2_6_59_118	226.69	0	-49.78
Etoposide_AML_control_r2_6_59_154	226.69	0	-272.35
Etoposide_AML_control_7_95_267	226.62	-142.82	-240.83
Etoposide_AML_control_7_95_199	226.62	-142.82	-331.4
Etoposide_AML_control_r2_5_25_56	226.5	-142.82	-46.96
Etoposide_AML_control_r2_5_25_72	226.5	-142.82	-272.52
Etoposide_AML_control_r2_2_63_138	226.05	0	-238.51
Etoposide_AML_control_r2_2_63_183	226.05	0	-295.77
Etoposide_AML_control_r2_9_31_109	226.04	-142.82	-107.53
Etoposide_AML_control_r2_9_31_69	226.04	0	-198.69
Etoposide_AML_control_1_42_83	226.03	-142.82	-56.39
Etoposide_AML_control_1_42_116	226.03	-142.82	-255.92
Etoposide_AML_control_2_86_171	225.75	-142.82	-263.2
Etoposide_AML_control_2_86_223	225.75	-142.82	-319.04
Etoposide_AML_control_r2_4_82_207	225.57	-142.82	-215.04
Etoposide_AML_control_r2_4_82_179	225.57	-142.82	-336.21
Etoposide_AML_control_r2_6_4_10	225.2	-142.82	-86.3
Etoposide_AML_control_r2_6_4_12	225.2	-142.82	-304
Etoposide_AML_control_7_12_32	224.72	0	-1
Etoposide_AML_control_7_12_23	224.72	0	-1
Etoposide_AML_control_2_75_194	224.2	0	-83.34
Etoposide_AML_control_2_75_149	224.2	0	-169.96
Etoposide_AML_control_r2_6_42_86	224.03	0	1
Etoposide_AML_control_r2_6_42_109	224.03	0	-65.92
Etoposide_AML_control_6_86_210	223.4	0	-1
Etoposide_AML_control_6_86_176	223.4	0	-1
Etoposide_AML_control_r2_2_61_176	223.16	-142.82	-1
Etoposide_AML_control_r2_2_61_133	223.16	-142.82	-1
Etoposide_AML_control_5_96_196	223.06	0	-1
Etoposide_AML_control_5_96_236	223.06	-142.82	-24.2
Etoposide_AML_control_6_40_103	222.97	0	0
Etoposide_AML_control_6_40_83	222.97	0	-148.78
Etoposide_AML_control_1_37_102	222.46	-142.82	-143.87
Etoposide_AML_control_1_37_70	222.46	-142.82	-308.64
Etoposide_AML_control_r2_4_57_144	222.07	0	-84.1
Etoposide_AML_control_r2_4_57_127	222.07	-142.82	-139.16
Etoposide_AML_control_5_39_78	221.81	0	-110.05
Etoposide_AML_control_5_39_99	221.81	0	-285.89
Etoposide_AML_control_4_36_83	221.34	-142.82	-1
Etoposide_AML_control_4_36_77	221.34	-142.82	-1
Etoposide_AML_control_r2_6_35_71	220.99	0	-240.11
Etoposide_AML_control_r2_6_35_90	220.99	0	-336.66
Etoposide_AML_control_4_72_147	220.97	-142.82	-148.75
Etoposide_AML_control_4_72_163	220.97	-142.82	-288.05
Etoposide_AML_control_r2_1_77_172	220.97	-142.82	-28.29
Etoposide_AML_control_r2_1_77_263	220.97	0	-163.46
Etoposide_AML_control_2_67_134	220.79	-142.82	-178.62
Etoposide_AML_control_2_67_172	220.79	0	-317.16
Etoposide_AML_control_5_62_153	220.46	-142.82	-119.6
Etoposide_AML_control_5_62_125	220.46	0	-147.43
Etoposide_AML_control_4_40_85	220.33	-142.82	-215.22
Etoposide_AML_control_4_40_91	220.33	-142.82	-398.76
Etoposide_AML_control_r2_5_27_60	220.25	-142.82	-117.21
Etoposide_AML_control_r2_5_27_77	220.25	0	-267.97
Etoposide_AML_control_r2_2_40_118	220.16	-142.82	-114.38
Etoposide_AML_control_r2_2_40_90	220.16	0	-249.78
Etoposide_AML_control_4_60_138	220.02	-142.82	-226.26
Etoposide_AML_control_4_60_123	220.02	-142.82	-259.37
Etoposide_AML_control_2_45_117	219.67	-142.82	-121.37
Etoposide_AML_control_2_45_88	219.67	-142.82	-187.83
Etoposide_AML_control_1_91_250	218.55	-142.82	-4.62
Etoposide_AML_control_1_91_182	218.55	-142.82	-372.41
Etoposide_AML_control_r2_7_34_119	217.56	-142.82	-119.49
Etoposide_AML_control_r2_7_34_72	217.56	-142.82	-214.88
Etoposide_AML_control_r2_6_73_151	217.49	-142.82	-186.53
Etoposide_AML_control_r2_6_73_190	217.49	-142.82	-356
Etoposide_AML_control_5_92_188	216.87	0	-244.36
Etoposide_AML_control_5_92_227	216.87	0	-271.46
Etoposide_AML_control_r2_4_33_86	216.81	-142.82	-37.23
Etoposide_AML_control_r2_4_33_77	216.81	-142.82	-72.17
Etoposide_AML_control_r2_7_79_257	216.77	-142.82	-319.22
Etoposide_AML_control_r2_7_79_163	216.77	-142.82	-329.62
Etoposide_AML_control_5_0_1	216.68	-142.82	-361.47
Etoposide_AML_control_5_0_0	216.68	-142.82	-363.64
Etoposide_AML_control_3_63_168	215.93	0	-17.33
Etoposide_AML_control_3_63_122	215.93	0	-210.15
Etoposide_AML_control_3_49_131	215.68	0	-12.05
Etoposide_AML_control_3_49_93	215.68	-285.64	-160.36
Etoposide_AML_control_r2_5_28_62	215.54	-142.82	-236.82
Etoposide_AML_control_r2_5_28_78	215.54	-142.82	-301.86
Etoposide_AML_control_3_50_95	215.43	-142.82	-241.72
Etoposide_AML_control_3_50_133	215.43	-142.82	-330.14
Etoposide_AML_control_r2_9_70_152	215.22	-142.82	-14.84
Etoposide_AML_control_r2_9_70_237	215.22	-142.82	-91.14
Etoposide_AML_control_7_49_142	215.11	0	-1
Etoposide_AML_control_7_49_102	215.11	0	-1
Etoposide_AML_control_4_70_159	214.47	0	-80.56
Etoposide_AML_control_4_70_143	214.47	0	-125.56
Etoposide_AML_control_5_61_151	214.22	0	-31.02
Etoposide_AML_control_5_61_124	214.22	0	-62.96
Etoposide_AML_control_r2_8_62_199	214.14	0	-1
Etoposide_AML_control_r2_8_62_141	214.14	0	-1
Etoposide_AML_control_4_95_212	214.03	-142.82	-290.34
Etoposide_AML_control_4_95_189	214.03	-142.82	-398.34
Etoposide_AML_control_5_69_172	213.83	0	-136.42
Etoposide_AML_control_5_69_141	213.83	0	-334.45
Etoposide_AML_control_r2_6_96_203	213.38	-142.82	-60.53
Etoposide_AML_control_r2_6_96_245	213.38	0	-215.14
Etoposide_AML_control_r2_3_97_289	212.97	-142.82	-1
Etoposide_AML_control_r2_3_97_219	212.97	-142.82	-1
Etoposide_AML_control_r2_7_80_164	212.17	-142.82	-74.39
Etoposide_AML_control_r2_7_80_258	212.17	-142.82	-119.53
Etoposide_AML_control_6_94_191	212.09	-142.82	1
Etoposide_AML_control_6_94_228	212.09	-142.82	-1
Etoposide_AML_control_r2_4_37_86	212.06	0	1
Etoposide_AML_control_r2_4_37_97	212.06	0	-297.24
Etoposide_AML_control_5_42_107	211.38	-142.82	-52.39
Etoposide_AML_control_4_43_90	211.38	0	-146.96
Etoposide_AML_control_4_43_97	211.38	0	-198.81
Etoposide_AML_control_5_42_84	211.38	-142.82	-223.17
Etoposide_AML_control_5_26_63	211.35	-142.82	-2.03
Etoposide_AML_control_5_26_50	211.35	0	-176.04
Etoposide_AML_control_r2_4_33_85	211.34	-142.82	-229.58
Etoposide_AML_control_r2_4_33_76	211.34	-142.82	-342
Etoposide_AML_control_6_54_134	211.22	0	-293.38
Etoposide_AML_control_6_54_111	211.22	0	-316.52
Etoposide_AML_control_r2_6_24_47	211.15	-142.82	-323.26
Etoposide_AML_control_r2_6_24_64	211.15	-142.82	-356.11
Etoposide_AML_control_6_80_197	211.05	0	-70.41
Etoposide_AML_control_6_80_163	211.05	0	-266.34
Etoposide_AML_control_r2_4_47_107	211	0	-271.46
Etoposide_AML_control_r2_4_47_123	211	0	-315.47
Etoposide_AML_control_r2_4_13_30	210.67	-142.82	-82.98
Etoposide_AML_control_r2_4_13_35	210.67	-142.82	-117.99
Etoposide_AML_control_r2_7_94_300	210.31	-142.82	-23.91
Etoposide_AML_control_r2_7_94_193	210.31	-142.82	-274.73
Etoposide_AML_control_6_80_196	210.29	-142.82	-142.39
Etoposide_AML_control_6_80_162	210.29	-142.82	-296.03
Etoposide_AML_control_r2_6_12_30	209.93	0	-46.25
Etoposide_AML_control_r2_6_12_25	209.93	0	-116.62
Etoposide_AML_control_6_85_173	209.83	0	-309.02
Etoposide_AML_control_6_85_209	209.83	-142.82	-331.03
Etoposide_AML_control_r2_5_33_89	209.78	-142.82	-1
Etoposide_AML_control_r2_5_33_73	209.78	-142.82	-1
Etoposide_AML_control_r2_1_77_264	209.68	-142.82	-3.1
Etoposide_AML_control_r2_1_77_173	209.68	-142.82	-318.89
Etoposide_AML_control_r2_8_48_163	209.08	-142.82	-148.99
Etoposide_AML_control_r2_8_48_112	209.08	-142.82	-302.19
Etoposide_AML_control_r2_7_64_133	208.86	-142.82	-278.54
Etoposide_AML_control_r2_7_64_217	208.86	-142.82	-378.89
Etoposide_AML_control_r2_5_41_89	208.79	-142.82	-37.37
Etoposide_AML_control_r2_5_41_112	208.79	-142.82	-62.72
Etoposide_AML_control_2_28_54	208.36	0	-231.37
Etoposide_AML_control_2_28_73	208.36	0	-244.16
Etoposide_AML_control_6_41_104	208.29	0	-1
Etoposide_AML_control_6_41_85	208.29	0	-1
Etoposide_AML_control_r2_5_63_131	208.24	0	-54.54
Etoposide_AML_control_r2_5_63_162	208.24	0	-208.43
Etoposide_AML_control_6_21_49	207.56	0	-107.63
Etoposide_AML_control_6_21_54	207.56	0	-127.91
Etoposide_AML_control_2_71_141	207.55	-142.82	-280.91
Etoposide_AML_control_2_71_182	207.55	0	-347.25
Etoposide_AML_control_2_21_56	207.54	-142.82	-16.6
Etoposide_AML_control_2_21_40	207.54	-142.82	-302.51
Etoposide_AML_control_6_51_128	207.35	-142.82	-383.26
Etoposide_AML_control_6_51_106	207.35	-142.82	-383.84
Etoposide_AML_control_r2_4_35_93	207.34	-142.82	-0.72
Etoposide_AML_control_r2_4_35_83	207.34	-142.82	-121.57
Etoposide_AML_control_r2_3_72_162	206.98	0	-1
Etoposide_AML_control_r2_3_72_222	206.98	-142.82	-65.02
Etoposide_AML_control_1_77_217	206.8	0	-1
Etoposide_AML_control_1_77_154	206.8	0	-1
Etoposide_AML_control_6_48_120	206.77	-142.82	-164.37
Etoposide_AML_control_6_48_99	206.77	-142.82	-365.81
Etoposide_AML_control_2_23_44	206.33	-142.82	-295.45
Etoposide_AML_control_2_23_60	206.33	-142.82	-354.43
Etoposide_AML_control_r2_5_71_147	205.85	0	-64.37
Etoposide_AML_control_r2_5_71_184	205.85	-142.82	-140.77
Etoposide_AML_control_r2_2_55_122	205.44	0	-1
Etoposide_AML_control_r2_2_55_162	205.44	0	-272.97
Etoposide_AML_control_6_48_100	205.17	-142.82	-99.55
Etoposide_AML_control_6_48_121	205.17	-142.82	-165.11
Etoposide_AML_control_r2_6_30_59	204.88	-142.82	-43.52
Etoposide_AML_control_r2_6_30_77	204.88	-142.82	-206.67
Etoposide_AML_control_6_62_152	204.75	-142.82	-205.24
Etoposide_AML_control_6_62_126	204.75	0	-207.16
Etoposide_AML_control_2_35_89	203.58	-142.82	-195.03
Etoposide_AML_control_2_35_67	203.58	-142.82	-361.49
Etoposide_AML_control_5_77_158	203.23	0	-244.94
Etoposide_AML_control_5_77_191	203.23	0	-264.65
Etoposide_AML_control_r2_5_26_58	203.22	-142.82	-0.45
Etoposide_AML_control_r2_5_26_74	203.22	-142.82	-182.78
Etoposide_AML_control_2_29_75	203.11	-142.82	-34.27
Etoposide_AML_control_2_29_55	203.11	-142.82	-229.11
Etoposide_AML_control_1_50_99	203.07	0	-378.1
Etoposide_AML_control_1_50_137	203.07	0	-415.19
Etoposide_AML_control_4_60_122	201.96	-142.82	-57.27
Etoposide_AML_control_4_60_137	201.96	-142.82	-244.47
Etoposide_AML_control_r2_4_52_134	201.89	-142.82	-1
Etoposide_AML_control_r2_4_52_118	201.89	-142.82	-1
Etoposide_AML_control_r2_6_87_226	201.64	0	-329.19
Etoposide_AML_control_r2_6_87_183	201.64	-142.82	-350.93
Etoposide_AML_control_7_88_181	201.61	-142.82	-145.78
Etoposide_AML_control_7_88_246	201.61	-142.82	-335.22
Etoposide_AML_control_3_80_212	201.2	-142.82	-155.42
Etoposide_AML_control_3_80_154	201.2	0	-285.17
Etoposide_AML_control_r2_4_4_10	200.54	0	-6.4
Etoposide_AML_control_r2_4_4_9	200.54	0	-15.55
Etoposide_AML_control_r2_3_89_272	200.06	0	-155.3
Etoposide_AML_control_r2_3_89_205	200.06	0	-262.73
Etoposide_AML_control_6_96_195	198.83	0	-229.89
Etoposide_AML_control_6_96_233	198.83	0	-253.22
Etoposide_AML_control_r2_7_37_128	198.47	-142.82	-1
Etoposide_AML_control_r2_7_37_78	198.47	-142.82	-1
Etoposide_AML_control_r2_6_71_186	198.39	-142.82	-7.86
Etoposide_AML_control_r2_6_71_146	198.39	-142.82	-188.99
Etoposide_AML_control_r2_2_82_244	198.38	0	-80.9
Etoposide_AML_control_r2_2_82_179	198.38	0	-254.35
Etoposide_AML_control_4_26_56	198.36	-142.82	-2.63
Etoposide_AML_control_4_26_62	198.36	-142.82	-265.22
Etoposide_AML_control_r2_4_84_183	197.76	-142.82	-246.11
Etoposide_AML_control_r2_4_84_211	197.76	-142.82	-314.49
Etoposide_AML_control_r2_2_81_178	196.94	-142.82	-26.13
Etoposide_AML_control_r2_2_81_242	196.94	-142.82	-365.68
Etoposide_AML_control_6_52_107	195.5	0	-129.97
Etoposide_AML_control_6_52_129	195.5	0	-242.47
Etoposide_AML_control_6_47_119	194.96	0	-1
Etoposide_AML_control_6_47_98	194.96	0	-1
Etoposide_AML_control_r2_6_2_6	194.85	0	-174.54
Etoposide_AML_control_r2_6_2_6	194.85	0	-205.22
Etoposide_AML_control_r2_9_54_184	194.58	-142.82	-1
Etoposide_AML_control_r2_9_54_118	194.58	-142.82	-1
Etoposide_AML_control_r2_4_54_121	194.58	-142.82	-64.78
Etoposide_AML_control_r2_4_54_138	194.58	-142.82	-200.41
Etoposide_AML_control_r2_5_44_95	194.46	-142.82	-20.01
Etoposide_AML_control_r2_5_44_118	194.46	0	-46.85
Etoposide_AML_control_r2_1_17_41	193.85	0	-168.73
Etoposide_AML_control_r2_1_17_64	193.85	0	-327.24
Etoposide_AML_control_r2_5_64_165	193.66	-142.82	-131.6
Etoposide_AML_control_r2_5_64_133	193.66	-142.82	-202.24
Etoposide_AML_control_4_3_8	192.68	0	-2.05
Etoposide_AML_control_4_3_9	192.68	-142.82	-300.01
Etoposide_AML_control_5_97_199	192.54	-142.82	-306.43
Etoposide_AML_control_5_97_237	192.54	-142.82	-337.89
Etoposide_AML_control_2_14_27	191.85	-142.82	-69.66
Etoposide_AML_control_2_14_38	191.85	-142.82	-220.37
Etoposide_AML_control_7_9_17	191.59	0	-262.32
Etoposide_AML_control_7_9_24	191.59	0	-409.81
Etoposide_AML_control_3_3_7	191.51	-142.82	-1
Etoposide_AML_control_3_3_5	191.51	-142.82	-1
Etoposide_AML_control_r2_3_96_216	190.96	-142.82	-305
Etoposide_AML_control_r2_3_96_287	190.96	-142.82	-314.81
Etoposide_AML_control_4_92_208	190.53	-142.82	-1
Etoposide_AML_control_4_92_184	190.53	0	-1
Etoposide_AML_control_6_75_183	190.5	0	-228.36
Etoposide_AML_control_6_75_152	190.5	0	-327.18
Etoposide_AML_control_r2_3_22_72	190.45	0	-1
Etoposide_AML_control_r2_3_22_52	190.45	-142.82	-1
Etoposide_AML_control_r2_5_84_212	190.1	-142.82	-41.13
Etoposide_AML_control_r2_5_84_170	190.1	-142.82	-182.98
Etoposide_AML_control_r2_4_44_115	190.04	0	-13.38
Etoposide_AML_control_r2_4_44_101	190.04	0	-178.43
Etoposide_AML_control_2_42_108	189.99	0	-42.77
Etoposide_AML_control_2_42_81	189.99	0	-231.43
Etoposide_AML_control_5_59_120	189.99	-142.82	-312.88
Etoposide_AML_control_5_59_147	189.99	-142.82	-359.18
Etoposide_AML_control_5_96_197	189.7	-142.82	-200.29
Etoposide_AML_control_5_96_235	189.7	-142.82	-366.1
Etoposide_AML_control_r2_5_55_114	189.59	-142.82	-27.41
Etoposide_AML_control_r2_5_55_143	189.59	-142.82	-91.7
Etoposide_AML_control_5_69_173	189.54	0	-259.44
Etoposide_AML_control_5_69_142	189.54	0	-299.38
Etoposide_AML_control_4_82_184	189.43	0	-276.25
Etoposide_AML_control_4_82_166	189.43	0	-402.05
Etoposide_AML_control_2_42_82	189.4	-142.82	-148.35
Etoposide_AML_control_2_42_109	189.4	-142.82	-230.29
Etoposide_AML_control_2_94_187	188.77	-142.82	-344.26
Etoposide_AML_control_2_94_243	188.77	-142.82	-366.75
Etoposide_AML_control_r2_6_30_58	188.59	-142.82	-6.94
Etoposide_AML_control_r2_6_30_78	188.59	-142.82	-190.61
Etoposide_AML_control_r2_4_76_191	188.2	0	-263.2
Etoposide_AML_control_r2_4_76_166	188.2	0	-327.7
Etoposide_AML_control_r2_9_72_156	187.79	-142.82	-371.72
Etoposide_AML_control_r2_9_72_242	187.79	-142.82	-372.59
Etoposide_AML_control_r2_4_29_68	187.64	0	-16.46
Etoposide_AML_control_r2_4_29_75	187.64	0	-371.11
Etoposide_AML_control_r2_2_39_87	187.14	-142.82	-294.34
Etoposide_AML_control_r2_2_39_116	187.14	-142.82	-364.56
Etoposide_AML_control_r2_8_23_49	186.53	0	-4.94
Etoposide_AML_control_r2_8_23_70	186.53	0	-83.9
Etoposide_AML_control_r2_7_75_245	185.73	-142.82	-50.15
Etoposide_AML_control_r2_7_75_154	185.73	-142.82	-115.87
Etoposide_AML_control_6_49_101	185.28	-142.82	-46.16
Etoposide_AML_control_6_49_122	185.28	-142.82	-63.63
Etoposide_AML_control_4_14_32	184.91	-142.82	-1
Etoposide_AML_control_4_14_31	184.91	-142.82	-1
Etoposide_AML_control_r2_5_32_88	184.86	-142.82	-124.38
Etoposide_AML_control_r2_5_32_71	184.86	-142.82	-131.5
Etoposide_AML_control_4_30_65	184.7	-142.82	-365.29
Etoposide_AML_control_4_30_71	184.7	-142.82	-378.53
Etoposide_AML_control_r2_4_30_70	184.42	-142.82	-20.31
Etoposide_AML_control_r2_4_30_76	184.42	-142.82	-366.05
Etoposide_AML_control_5_76_188	184.34	0	-226.88
Etoposide_AML_control_5_76_156	184.34	0	-243.02
Etoposide_AML_control_r2_4_39_102	184.29	-142.82	-1
Etoposide_AML_control_r2_4_39_90	184.29	-142.82	-1
Etoposide_AML_control_4_14_30	183.67	0	-229.1
Etoposide_AML_control_4_14_31	183.67	0	-382.23
Etoposide_AML_control_5_34_85	183.13	0	-355.63
Etoposide_AML_control_5_34_67	183.13	0	-393.9
Etoposide_AML_control_r2_4_42_97	182.96	-142.82	-177.21
Etoposide_AML_control_r2_4_42_109	182.96	-142.82	-201.04
Etoposide_AML_control_2_56_110	182.76	-142.82	-183.7
Etoposide_AML_control_2_56_145	182.76	-142.82	-352.2
Etoposide_AML_control_r2_5_12_41	182.46	-142.82	-30.81
Etoposide_AML_control_r2_5_12_29	182.46	-142.82	-148.14
Etoposide_AML_control_r2_5_62_160	182.2	-142.82	-1
Etoposide_AML_control_r2_5_62_130	182.2	-142.82	-1
Etoposide_AML_control_r2_4_73_184	182.15	-142.82	-162.3
Etoposide_AML_control_r2_4_73_161	182.15	-142.82	-244.43
Etoposide_AML_control_r2_5_93_185	181.98	0	-27.39
Etoposide_AML_control_r2_5_93_232	181.98	-428.46	-295.44
Etoposide_AML_control_4_28_67	180.64	0	-345
Etoposide_AML_control_4_28_61	180.64	-142.82	-376.44
Etoposide_AML_control_r2_4_40_104	180.62	-142.82	-1
Etoposide_AML_control_r2_4_40_92	180.62	0	-1
Etoposide_AML_control_r2_4_62_155	180.61	-142.82	-1
Etoposide_AML_control_r2_4_62_139	180.61	-142.82	-1
Etoposide_AML_control_r2_9_40_139	180.05	0	1
Etoposide_AML_control_r2_9_40_87	180.05	0	1
Etoposide_AML_control_6_59_145	179.66	-142.82	-1
Etoposide_AML_control_6_59_119	179.66	-142.82	-1
Etoposide_AML_control_r2_3_3_38	179.27	-142.82	-255.35
Etoposide_AML_control_r2_3_3_50	179.27	-142.82	-277.28
Etoposide_AML_control_r2_4_42_96	178.81	0	-9.77
Etoposide_AML_control_r2_4_42_110	178.81	0	-145.65
Etoposide_AML_control_5_46_91	178.73	-142.82	-210.73
Etoposide_AML_control_5_46_116	178.73	-142.82	-354.89
Etoposide_AML_control_6_76_155	178.69	0	-70.52
Etoposide_AML_control_6_76_185	178.69	-142.82	-221.7
Etoposide_AML_control_r2_7_38_131	178.4	-142.82	-11.43
Etoposide_AML_control_r2_7_38_81	178.4	-142.82	-309.82
Etoposide_AML_control_5_86_212	178.38	-142.82	-11.31
Etoposide_AML_control_5_86_175	178.38	-142.82	-329.7
Etoposide_AML_control_r2_4_39_103	177.47	-142.82	-1
Etoposide_AML_control_r2_4_39_91	177.47	-142.82	-1
Etoposide_AML_control_r2_5_96_238	177.4	-142.82	-133.73
Etoposide_AML_control_r2_5_96_192	177.4	-142.82	-306.91
Etoposide_AML_control_6_61_124	177.06	0	-160.79
Etoposide_AML_control_6_61_149	177.06	0	-229.16
Etoposide_AML_control_r2_6_16_43	176.23	-142.82	-1
Etoposide_AML_control_r2_6_16_34	176.23	-142.82	-33.35
Etoposide_AML_control_r2_8_95_210	176.15	-142.82	-266.64
Etoposide_AML_control_r2_8_95_289	176.15	-142.82	-371.38
Etoposide_AML_control_r2_8_67_152	175.92	-142.82	-1
Etoposide_AML_control_r2_8_67_215	175.92	-142.82	-295.82
Etoposide_AML_control_r2_9_3_8	175.86	-142.82	-1
Etoposide_AML_control_r2_9_3_5	175.86	-142.82	-1
Etoposide_AML_control_r2_4_3_7	175.54	-142.82	-263.35
Etoposide_AML_control_r2_4_3_7	175.54	-142.82	-378.61
Etoposide_AML_control_r2_3_83_192	175.49	0	-144.99
Etoposide_AML_control_r2_3_83_258	175.49	0	-248.97
Etoposide_AML_control_r2_9_73_245	175.14	-142.82	-281.84
Etoposide_AML_control_r2_9_73_159	175.14	-142.82	-351.96
Etoposide_AML_control_5_42_108	174.53	-142.82	-51.6
Etoposide_AML_control_5_42_83	174.53	-142.82	-330.18
Etoposide_AML_control_r2_4_60_150	174.49	-142.82	-134.01
Etoposide_AML_control_r2_4_60_134	174.49	-142.82	-186.71
Etoposide_AML_control_r2_5_7_20	174.08	0	-111.06
Etoposide_AML_control_r2_5_7_27	174.08	0	-146.37
Etoposide_AML_control_6_94_192	173.95	0	-315.28
Etoposide_AML_control_6_94_229	173.95	0	-352.37
Etoposide_AML_control_2_65_130	173.86	-142.82	-1
Etoposide_AML_control_2_65_167	173.86	-142.82	-355.33
Etoposide_AML_control_6_30_78	173.65	-142.82	-374.95
Etoposide_AML_control_6_30_65	173.65	-142.82	-377.04
Etoposide_AML_control_1_78_219	173.48	0	1
Etoposide_AML_control_1_78_156	173.48	-142.82	-1
Etoposide_AML_control_5_61_152	173.12	0	1
Etoposide_AML_control_5_61_123	173.12	0	1
Etoposide_AML_control_r2_5_12_30	173.06	-142.82	-192.16
Etoposide_AML_control_r2_5_12_40	173.06	-142.82	-282.96
Etoposide_AML_control_2_98_252	172.93	-142.82	-269.21
Etoposide_AML_control_2_98_195	172.93	-142.82	-347.38
Etoposide_AML_control_3_27_68	172.61	0	-1
Etoposide_AML_control_3_27_44	172.61	0	-1
Etoposide_AML_control_r2_5_19_59	172.08	-142.82	-40.55
Etoposide_AML_control_r2_5_19_44	172.08	-142.82	-79.09
Etoposide_AML_control_r2_5_85_215	171.86	-142.82	-1
Etoposide_AML_control_r2_5_85_172	171.86	-142.82	-1
Etoposide_AML_control_1_33_92	170.58	0	-284.6
Etoposide_AML_control_1_33_63	170.58	0	-425.55
Etoposide_AML_control_5_46_117	170.53	0	-38.94
Etoposide_AML_control_5_46_92	170.53	0	-203.66
Etoposide_AML_control_r2_8_91_203	170.36	-142.82	-277.45
Etoposide_AML_control_r2_8_91_282	170.36	-142.82	-360.2
Etoposide_AML_control_r2_5_85_214	169.67	-142.82	-1
Etoposide_AML_control_r2_5_85_171	169.67	-142.82	-1
Etoposide_AML_control_2_63_162	169.63	-142.82	-109.8
Etoposide_AML_control_2_63_125	169.63	-142.82	-191.54
Etoposide_AML_control_r2_6_61_161	169.32	-142.82	-237.79
Etoposide_AML_control_r2_6_61_123	169.32	-142.82	-330.52
Etoposide_AML_control_r2_6_2_7	169	-142.82	-45.78
Etoposide_AML_control_r2_6_2_5	169	-142.82	-104.2
Etoposide_AML_control_r2_5_96_191	167.87	0	-63
Etoposide_AML_control_r2_5_96_239	167.87	0	-198.15
Etoposide_AML_control_r2_2_4_8	167.49	0	-295.74
Etoposide_AML_control_r2_2_4_7	167.49	-142.82	-325.02
Etoposide_AML_control_6_90_184	167.34	-142.82	-325
Etoposide_AML_control_6_90_220	167.34	-142.82	-356.16
Etoposide_AML_control_r2_6_98_207	167.12	-428.46	-285.67
Etoposide_AML_control_r2_6_98_249	167.12	-428.46	-303.58
Etoposide_AML_control_5_26_64	166.81	-142.82	-342.68
Etoposide_AML_control_5_26_49	166.81	-142.82	-394.66
Etoposide_AML_control_r2_9_73_244	166.34	-142.82	-1
Etoposide_AML_control_r2_9_73_158	166.34	-142.82	-1
Etoposide_AML_control_1_35_67	165.92	0	-43.46
Etoposide_AML_control_1_35_98	165.92	-142.82	-93.42
Etoposide_AML_control_2_21_41	165.5	0	-1
Etoposide_AML_control_2_21_57	165.5	0	-249.97
Etoposide_AML_control_3_70_134	165.5	-142.82	-343.23
Etoposide_AML_control_3_70_183	165.5	-142.82	-388.77
Etoposide_AML_control_2_13_37	165.31	0	-146.98
Etoposide_AML_control_2_13_25	165.31	0	-177.2
Etoposide_AML_control_4_8_21	165.12	-142.82	-286.43
Etoposide_AML_control_4_8_19	165.12	-142.82	-395.99
Etoposide_AML_control_r2_4_32_75	164.84	0	-1
Etoposide_AML_control_r2_4_32_84	164.84	0	-330.16
Etoposide_AML_control_r2_6_72_187	164.01	0	-0.26
Etoposide_AML_control_r2_6_72_148	164.01	0	-354.64
Etoposide_AML_control_2_75_150	163.18	0	-29.69
Etoposide_AML_control_2_75_193	163.18	0	-40.06
Etoposide_AML_control_r2_8_5_10	162.81	0	-19.95
Etoposide_AML_control_r2_8_5_16	162.81	0	-133.49
Etoposide_AML_control_r2_7_68_226	162.74	0	-158.26
Etoposide_AML_control_r2_7_68_140	162.74	0	-218.35
Etoposide_AML_control_5_14_31	162.65	-142.82	-69.46
Etoposide_AML_control_5_14_37	162.65	-142.82	-135.36
Etoposide_AML_control_r2_6_7_20	161.59	-142.82	-153.76
Etoposide_AML_control_r2_6_7_15	161.59	-142.82	-180.29
Etoposide_AML_control_5_8_24	161.51	-142.82	-326.94
Etoposide_AML_control_5_8_20	161.51	0	-378.53
Etoposide_AML_control_7_72_204	161.29	0	-1
Etoposide_AML_control_7_72_148	161.29	-142.82	-1
Etoposide_AML_control_r2_4_82_206	160.92	0	-114.3
Etoposide_AML_control_r2_4_82_178	160.92	0	-216.21
Etoposide_AML_control_r2_6_67_137	160.56	0	1
Etoposide_AML_control_r2_6_67_177	160.56	0	-75.67
Etoposide_AML_control_4_97_194	160.19	-142.82	-11.03
Etoposide_AML_control_4_97_217	160.19	-142.82	-295.38
Etoposide_AML_control_3_59_114	159.45	0	-130.6
Etoposide_AML_control_3_59_161	159.45	0	-197.74
Etoposide_AML_control_r2_6_1_5	159.45	-142.82	-1
Etoposide_AML_control_r2_6_1_3	159.45	0	-1
Etoposide_AML_control_2_71_183	159.32	0	-302.54
Etoposide_AML_control_2_71_142	159.32	0	-349.62
Etoposide_AML_control_r2_7_32_114	157.43	0	1
Etoposide_AML_control_r2_7_32_68	157.43	-285.64	-237.56
Etoposide_AML_control_r2_2_56_123	156.72	-142.82	-334.69
Etoposide_AML_control_r2_2_56_163	156.72	-142.82	-369.79
Etoposide_AML_control_r2_5_22_65	156.59	-142.82	-304.36
Etoposide_AML_control_r2_5_22_50	156.59	-142.82	-308.83
Etoposide_AML_control_r2_6_62_125	155.72	-428.46	-203.6
Etoposide_AML_control_r2_6_62_162	155.72	0	-215.4
Etoposide_AML_control_r2_4_73_185	155.54	0	-145.11
Etoposide_AML_control_r2_4_73_160	155.54	0	-262.35
Etoposide_AML_control_4_44_99	155.17	-142.82	-117.39
Etoposide_AML_control_4_44_91	155.17	-142.82	-241.1
Etoposide_AML_control_r2_6_74_192	155.12	0	-212.82
Etoposide_AML_control_r2_6_74_153	155.12	0	-246.39
Etoposide_AML_control_1_59_165	154.7	-142.82	-1
Etoposide_AML_control_1_59_117	154.7	-142.82	-1
Etoposide_AML_control_4_23_54	154.55	-142.82	-168.79
Etoposide_AML_control_4_23_49	154.55	-142.82	-309.85
Etoposide_AML_control_5_64_159	154.33	-142.82	-1
Etoposide_AML_control_5_64_129	154.33	-142.82	-1
Etoposide_AML_control_r2_4_72_159	154.13	-142.82	-130.99
Etoposide_AML_control_r2_4_72_182	154.13	-142.82	-140.04
Etoposide_AML_control_r2_3_64_204	153.8	0	-1
Etoposide_AML_control_r2_3_64_146	153.8	-142.82	-1
Etoposide_AML_control_7_88_245	153.48	0	-1
Etoposide_AML_control_7_88_182	153.48	0	-1
Etoposide_AML_control_2_26_68	153.27	-142.82	-143.06
Etoposide_AML_control_2_26_50	153.27	-142.82	-278.28
Etoposide_AML_control_r2_5_17_41	153.2	-142.82	-59.09
Etoposide_AML_control_r2_5_17_55	153.2	-142.82	-77.9
Etoposide_AML_control_r2_4_0_1	152.92	-142.82	-259.4
Etoposide_AML_control_r2_4_0_0	152.92	-142.82	-281.83
Etoposide_AML_control_r2_5_42_92	152.66	-142.82	-201.86
Etoposide_AML_control_r2_5_42_114	152.66	-142.82	-314.94
Etoposide_AML_control_r2_4_14_32	152.25	-142.82	-197.27
Etoposide_AML_control_r2_4_14_36	152.25	-142.82	-239.95
Etoposide_AML_control_r2_4_74_187	151.7	-142.82	-215.87
Etoposide_AML_control_r2_4_74_163	151.7	-142.82	-365.37
Etoposide_AML_control_r2_1_39_137	151.54	0	-254.7
Etoposide_AML_control_r2_1_39_89	151.54	0	-316.38
Etoposide_AML_control_5_9_21	151.33	0	-288.74
Etoposide_AML_control_5_9_26	151.33	0	-339.29
Etoposide_AML_control_5_86_213	151.22	0	-330.92
Etoposide_AML_control_5_86_174	151.22	0	-362.1
Etoposide_AML_control_r2_2_20_45	150.72	0	-127.88
Etoposide_AML_control_r2_2_20_59	150.72	0	-203.85
Etoposide_AML_control_4_85_170	150.68	-142.82	-338.74
Etoposide_AML_control_4_85_192	150.68	-142.82	-365.93
Etoposide_AML_control_4_39_89	150.67	-142.82	-1
Etoposide_AML_control_4_39_83	150.67	-142.82	-1
Etoposide_AML_control_2_67_171	150.39	0	-75.2
Etoposide_AML_control_2_67_133	150.39	0	-92.62
Etoposide_AML_control_r2_3_63_202	150.39	0	-180.66
Etoposide_AML_control_r2_3_63_144	150.39	-142.82	-209.62
Etoposide_AML_control_2_22_58	150.12	-142.82	-1
Etoposide_AML_control_2_22_43	150.12	-142.82	-1
Etoposide_AML_control_r2_6_11_28	149.76	-142.82	-9.52
Etoposide_AML_control_r2_6_11_23	149.76	-142.82	-91.47
Etoposide_AML_control_r2_7_78_254	149.2	0	-19
Etoposide_AML_control_r2_7_78_161	149.2	0	-380.13
Etoposide_AML_control_5_93_228	148.72	-142.82	-223.6
Etoposide_AML_control_5_93_191	148.72	-142.82	-319.92
Etoposide_AML_control_1_30_85	148.65	0	-355.56
Etoposide_AML_control_1_30_56	148.65	-142.82	-407.66
Etoposide_AML_control_7_23_49	148.59	-142.82	-1
Etoposide_AML_control_7_23_64	148.59	-142.82	-121.22
Etoposide_AML_control_r2_8_91_281	148.55	-142.82	-62.76
Etoposide_AML_control_r2_8_91_204	148.55	-142.82	-107.9
Etoposide_AML_control_r2_4_57_143	148.31	-142.82	-56.89
Etoposide_AML_control_r2_4_57_128	148.31	-142.82	-84.81
Etoposide_AML_control_r2_5_62_161	147.82	-142.82	-127.16
Etoposide_AML_control_r2_5_62_129	147.82	-142.82	-230.6
Etoposide_AML_control_5_8_23	146.66	-142.82	-47.45
Etoposide_AML_control_5_8_19	146.66	-142.82	-68.71
Etoposide_AML_control_5_73_148	145.56	0	-85.3
Etoposide_AML_control_5_73_181	145.56	0	-202.71
Etoposide_AML_control_r2_5_91_227	145.43	0	-166.98
Etoposide_AML_control_r2_5_91_182	145.43	0	-268.86
Etoposide_AML_control_r2_4_18_40	145.38	-142.82	-212.26
Etoposide_AML_control_r2_4_18_45	145.38	-142.82	-271.88
Etoposide_AML_control_4_96_215	145.16	-142.82	-334.7
Etoposide_AML_control_4_96_191	145.16	-142.82	-355.56
Etoposide_AML_control_5_77_190	144.98	0	-395.26
Etoposide_AML_control_5_77_157	144.98	-142.82	-401.77
Etoposide_AML_control_r2_5_45_120	144.69	-142.82	-1
Etoposide_AML_control_r2_5_45_97	144.69	0	-1
Etoposide_AML_control_3_97_258	144.03	-142.82	-1
Etoposide_AML_control_3_97_186	144.03	-142.82	-1
Etoposide_AML_control_r2_4_60_151	143.42	-142.82	-1
Etoposide_AML_control_r2_4_60_135	143.42	-142.82	-282.86
Etoposide_AML_control_5_15_38	143.34	-142.82	-1
Etoposide_AML_control_5_15_32	143.34	-142.82	-1
Etoposide_AML_control_r2_6_96_244	143.07	-142.82	-1
Etoposide_AML_control_r2_6_96_202	143.07	-142.82	-1
Etoposide_AML_control_2_28_72	143.03	-142.82	-194.99
Etoposide_AML_control_2_28_53	143.03	-142.82	-241.86
Etoposide_AML_control_r2_5_19_58	142.67	-142.82	-1
Etoposide_AML_control_r2_5_19_45	142.67	-142.82	-1
Etoposide_AML_control_4_53_120	142.49	0	-95.29
Etoposide_AML_control_4_53_108	142.49	0	-174.83
Etoposide_AML_control_1_9_21	142.31	0	-1
Etoposide_AML_control_1_9_15	142.31	0	-1
Etoposide_AML_control_2_83_166	142.05	-142.82	-229.42
Etoposide_AML_control_2_83_215	142.05	-142.82	-342.88
Etoposide_AML_control_r2_2_32_95	141.99	0	-118.06
Etoposide_AML_control_r2_2_32_72	141.99	0	-254.46
Etoposide_AML_control_2_5_10	141.64	0	1
Etoposide_AML_control_2_5_13	141.64	0	-285.96
Etoposide_AML_control_4_84_189	141.54	-142.82	-91.72
Etoposide_AML_control_4_84_169	141.54	-142.82	-171.29
Etoposide_AML_control_r2_6_83_214	140.9	-142.82	-1
Etoposide_AML_control_r2_6_83_174	140.9	-142.82	-48.84
Etoposide_AML_control_5_29_54	139.08	-142.82	-85
Etoposide_AML_control_5_29_72	139.08	-142.82	-222.16
Etoposide_AML_control_r2_9_47_158	138.23	-142.82	-343.71
Etoposide_AML_control_r2_9_47_101	138.23	-142.82	-353.71
Etoposide_AML_control_r2_6_89_187	138.22	-142.82	-1
Etoposide_AML_control_r2_6_89_230	138.22	0	-357.43
Etoposide_AML_control_5_1_2	137.48	0	-275.53
Etoposide_AML_control_5_1_3	137.48	0	-312.9
Etoposide_AML_control_r2_4_90_194	137.34	-142.82	-364.41
Etoposide_AML_control_r2_4_90_223	137.34	-142.82	-367.87
Etoposide_AML_control_6_87_213	136.36	-142.82	-243.26
Etoposide_AML_control_6_87_178	136.36	-142.82	-298.19
Etoposide_AML_control_r2_7_91_291	136.24	0	-183.13
Etoposide_AML_control_r2_7_91_187	136.24	0	-275.89
Etoposide_AML_control_r2_6_7_16	135.87	-142.82	-306.94
Etoposide_AML_control_r2_6_7_19	135.87	-142.82	-349.41
Etoposide_AML_control_r2_7_65_218	134.89	-142.82	-1
Etoposide_AML_control_r2_7_65_135	134.89	-142.82	-1
Etoposide_AML_control_r2_8_97_212	134.55	0	-1
Etoposide_AML_control_r2_8_97_294	134.55	0	-302.78
Etoposide_AML_control_5_84_171	134.06	-142.82	-38.74
Etoposide_AML_control_5_84_209	134.06	-142.82	-132.71
Etoposide_AML_control_r2_8_78_248	133.09	-142.82	-1
Etoposide_AML_control_r2_8_78_178	133.09	-142.82	-1
Etoposide_AML_control_r2_7_32_69	132.52	-142.82	-81.1
Etoposide_AML_control_r2_7_32_115	132.52	-142.82	-210.84
Etoposide_AML_control_4_13_29	132.41	0	-1
Etoposide_AML_control_4_13_28	132.41	0	-1
Etoposide_AML_control_r2_8_85_192	132.02	0	-190.39
Etoposide_AML_control_r2_8_85_268	132.02	0	-199.76
Etoposide_AML_control_r2_6_41_106	131.72	-142.82	-1
Etoposide_AML_control_r2_6_41_83	131.72	-142.82	-1
Etoposide_AML_control_r2_2_71_211	131.4	-142.82	-1
Etoposide_AML_control_r2_2_71_157	131.4	0	-1
Etoposide_AML_control_6_42_106	131.19	0	-1
Etoposide_AML_control_6_42_86	131.19	0	-1
Etoposide_AML_control_4_53_119	131.08	-142.82	-1
Etoposide_AML_control_4_53_107	131.08	-142.82	-1
Etoposide_AML_control_4_84_190	131.03	-142.82	-79.03
Etoposide_AML_control_4_84_168	131.03	-142.82	-105.63
Etoposide_AML_control_r2_9_77_252	130.75	-142.82	-1
Etoposide_AML_control_r2_9_77_167	130.75	-142.82	-1
Etoposide_AML_control_r2_6_4_11	130.43	-142.82	-162.44
Etoposide_AML_control_r2_6_4_9	130.43	-142.82	-285.04
Etoposide_AML_control_r2_8_15_42	130.14	-142.82	-1
Etoposide_AML_control_r2_8_15_27	130.14	-142.82	-1
Etoposide_AML_control_r2_4_48_108	129.62	-142.82	-154.98
Etoposide_AML_control_r2_4_48_124	129.62	-142.82	-180.79
Etoposide_AML_control_r2_2_9_22	129.11	-142.82	-299.97
Etoposide_AML_control_r2_2_9_16	129.11	-142.82	-303.18
Etoposide_AML_control_r2_6_65_172	128.34	-142.82	-93.78
Etoposide_AML_control_r2_6_65_133	128.34	-142.82	-201.97
Etoposide_AML_control_6_93_189	128.02	0	1
Etoposide_AML_control_6_93_227	128.02	0	-1
Etoposide_AML_control_r2_6_58_153	128	-142.82	-83.16
Etoposide_AML_control_r2_6_58_117	128	-142.82	-190.75
Etoposide_AML_control_r2_2_82_245	127.89	-285.64	1
Etoposide_AML_control_r2_2_82_180	127.89	-285.64	-324.25
Etoposide_AML_control_r2_4_92_226	127.87	-142.82	-64.24
Etoposide_AML_control_r2_4_92_197	127.87	-142.82	-68.35
Etoposide_AML_control_1_89_178	127.72	-142.82	-22.39
Etoposide_AML_control_1_89_245	127.72	-142.82	-365.24
Etoposide_AML_control_1_37_103	127.43	-142.82	-1
Etoposide_AML_control_1_37_71	127.43	-142.82	-1
Etoposide_AML_control_6_18_43	127.05	0	-124.5
Etoposide_AML_control_6_18_49	127.05	0	-163.12
Etoposide_AML_control_2_96_248	126.53	0	-1
Etoposide_AML_control_2_96_192	126.53	0	-1
Etoposide_AML_control_r2_6_35_70	126.48	-142.82	-278.62
Etoposide_AML_control_r2_6_35_91	126.48	-142.82	-352.53
Etoposide_AML_control_r2_4_84_212	126.12	-142.82	-166.02
Etoposide_AML_control_r2_4_84_184	126.12	-142.82	-258.22
Etoposide_AML_control_2_83_165	125.06	0	-215.63
Etoposide_AML_control_2_83_214	125.06	0	-234.31
Etoposide_AML_control_r2_2_55_161	124.99	-142.82	-1
Etoposide_AML_control_r2_2_55_121	124.99	-142.82	-1
Etoposide_AML_control_r2_9_86_187	124.6	-142.82	-147.76
Etoposide_AML_control_r2_9_86_280	124.6	-142.82	-223.66
Etoposide_AML_control_7_73_206	124.52	-142.82	-195.26
Etoposide_AML_control_7_73_149	124.52	-142.82	-316
Etoposide_AML_control_6_44_110	122.99	-142.82	-6.3
Etoposide_AML_control_6_44_90	122.99	-142.82	-350.88
Etoposide_AML_control_r2_6_73_150	122.99	0	1
Etoposide_AML_control_r2_6_73_189	122.99	0	-49.43
Etoposide_AML_control_4_3_8	122.97	-142.82	-321.16
Etoposide_AML_control_4_3_7	122.97	-142.82	-322.67
Etoposide_AML_control_r2_4_2_5	122.37	-142.82	-300.38
Etoposide_AML_control_r2_4_2_5	122.37	-142.82	-367.78
Etoposide_AML_control_r2_5_95_190	121.96	0	-70.12
Etoposide_AML_control_r2_5_95_237	121.96	0	-188.98
Etoposide_AML_control_6_93_226	121.92	-142.82	-67.77
Etoposide_AML_control_5_59_119	121.92	-142.82	-102.49
Etoposide_AML_control_6_93_190	121.92	-142.82	-153.85
Etoposide_AML_control_5_59_146	121.92	-142.82	-201.01
Etoposide_AML_control_r2_3_89_271	121.57	0	-178.95
Etoposide_AML_control_r2_3_89_204	121.57	-142.82	-259.86
Etoposide_AML_control_r2_4_14_37	121.49	-142.82	-13.22
Etoposide_AML_control_r2_4_14_31	121.49	-142.82	-364.76
Etoposide_AML_control_r2_4_0_1	120.82	-142.82	-14.42
Etoposide_AML_control_r2_4_0_0	120.82	-142.82	-99.1
Etoposide_AML_control_1_40_111	120.6	0	-1
Etoposide_AML_control_1_40_76	120.6	0	-1
Etoposide_AML_control_r2_4_55_123	120.53	-142.82	-30.69
Etoposide_AML_control_r2_4_55_139	120.53	-142.82	-326.88
Etoposide_AML_control_5_81_166	118.6	-142.82	-305.31
Etoposide_AML_control_5_81_203	118.6	-142.82	-355.12
Etoposide_AML_control_r2_8_95_209	118.16	0	-164.34
Etoposide_AML_control_r2_8_95_290	118.16	0	-212.66
Etoposide_AML_control_r2_2_81_177	117.58	0	-3.62
Etoposide_AML_control_r2_2_81_243	117.58	-142.82	-82.23
Etoposide_AML_control_r2_5_32_87	117.29	-142.82	-42.16
Etoposide_AML_control_r2_5_32_72	117.29	-142.82	-127.5
Etoposide_AML_control_4_64_145	117.14	0	-253.57
Etoposide_AML_control_4_64_131	117.14	0	-270.69
Etoposide_AML_control_r2_5_84_169	116.36	-142.82	-15.41
Etoposide_AML_control_r2_5_84_213	116.36	-142.82	-63.73
Etoposide_AML_control_r2_8_53_176	116.17	0	-1
Etoposide_AML_control_r2_8_53_120	116.17	0	-1
Etoposide_AML_control_r2_9_70_238	115.61	-142.82	-233
Etoposide_AML_control_r2_9_70_153	115.61	-142.82	-240.49
Etoposide_AML_control_3_35_91	115.33	0	-297.54
Etoposide_AML_control_3_35_61	115.33	-428.46	-337.53
Etoposide_AML_control_r2_6_10_22	115.28	-142.82	-169.85
Etoposide_AML_control_r2_6_10_26	115.28	-142.82	-268.89
Etoposide_AML_control_4_43_89	115.17	-142.82	-247.15
Etoposide_AML_control_4_43_98	115.17	-142.82	-331.69
Etoposide_AML_control_2_5_14	115.11	-142.82	-31.34
Etoposide_AML_control_3_49_94	115.11	0	-166.34
Etoposide_AML_control_3_49_132	115.11	0	-220.38
Etoposide_AML_control_3_65_172	115.11	0	-303.92
Etoposide_AML_control_2_5_11	115.11	-142.82	-320.63
Etoposide_AML_control_3_65_126	115.11	0	-374.38
Etoposide_AML_control_1_31_88	114.97	-142.82	-224.18
Etoposide_AML_control_1_31_58	114.97	-142.82	-324.45
Etoposide_AML_control_3_96_255	114.92	-142.82	-30.5
Etoposide_AML_control_3_96_184	114.92	0	-34.92
Etoposide_AML_control_r2_6_81_209	114.88	0	-1
Etoposide_AML_control_r2_6_81_170	114.88	0	-1
Etoposide_AML_control_r2_3_44_141	114.56	-142.82	-354.42
Etoposide_AML_control_r2_3_44_102	114.56	-142.82	-364.18
Etoposide_AML_control_r2_6_11_24	114.51	-142.82	-80.13
Etoposide_AML_control_r2_6_11_29	114.51	-142.82	-82.19
Etoposide_AML_control_r2_1_32_76	114.04	-142.82	1
Etoposide_AML_control_r2_1_32_117	114.04	0	-370.16
Etoposide_AML_control_r2_4_3_6	113.61	0	1
Etoposide_AML_control_r2_4_3_8	113.61	0	-146.38
Etoposide_AML_control_4_34_79	113.52	0	-1
Etoposide_AML_control_4_34_71	113.52	0	-229.83
Etoposide_AML_control_4_69_157	113.29	0	-21.24
Etoposide_AML_control_4_69_140	113.29	0	-22.18
Etoposide_AML_control_r2_4_77_193	113.26	0	-1
Etoposide_AML_control_r2_4_77_168	113.26	0	-1
Etoposide_AML_control_6_73_178	111.78	-428.46	1
Etoposide_AML_control_6_73_148	111.78	-428.46	1
Etoposide_AML_control_6_26_69	111.34	0	-19.26
Etoposide_AML_control_6_26_59	111.34	0	-64.51
Etoposide_AML_control_r2_1_17_42	110.07	0	-8.84
Etoposide_AML_control_r2_1_17_63	110.07	0	-9.73
Etoposide_AML_control_r2_6_9_24	109.84	0	-1
Etoposide_AML_control_r2_6_9_20	109.84	0	-1
Etoposide_AML_control_6_3_8	109.63	0	-135.08
Etoposide_AML_control_6_3_8	109.63	0	-215.63
Etoposide_AML_control_3_21_56	107.66	0	-14.08
Etoposide_AML_control_3_21_35	107.66	0	-34.18
Etoposide_AML_control_6_30_66	106.41	-142.82	-113.39
Etoposide_AML_control_6_30_79	106.41	-142.82	-151.27
Etoposide_AML_control_2_36_69	106.37	-142.82	-306.97
Etoposide_AML_control_2_36_90	106.37	-142.82	-374.77
Etoposide_AML_control_2_76_196	106.15	-142.82	-1
Etoposide_AML_control_2_76_152	106.15	-142.82	-1
Etoposide_AML_control_r2_3_56_130	105.61	0	-285.82
Etoposide_AML_control_r2_3_56_181	105.61	0	-309.86
Etoposide_AML_control_r2_6_72_188	105.37	0	-11.93
Etoposide_AML_control_r2_6_72_149	105.37	-142.82	-324.59
Etoposide_AML_control_4_61_125	104.67	0	-149.77
Etoposide_AML_control_4_61_140	104.67	0	-189.27
Etoposide_AML_control_r2_7_79_162	104.3	-142.82	-81.03
Etoposide_AML_control_r2_7_79_256	104.3	-142.82	-152.44
Etoposide_AML_control_r2_6_69_142	103.63	0	1
Etoposide_AML_control_r2_6_69_181	103.63	0	-61.57
Etoposide_AML_control_4_11_26	103.03	0	-182.82
Etoposide_AML_control_4_11_25	103.03	0	-266.46
Etoposide_AML_control_4_45_94	102.82	0	-1
Etoposide_AML_control_4_45_102	102.82	0	-273.67
Etoposide_AML_control_3_60_163	102.62	-142.82	-61.21
Etoposide_AML_control_3_60_116	102.62	-142.82	-72.02
Etoposide_AML_control_r2_4_55_124	101.97	0	-42.8
Etoposide_AML_control_r2_4_55_140	101.97	0	-48.14
Etoposide_AML_control_3_3_6	101.73	0	-1
Etoposide_AML_control_3_3_4	101.73	0	-1
Etoposide_AML_control_3_16_41	101.42	0	-1
Etoposide_AML_control_3_16_26	101.42	0	-1
Etoposide_AML_control_r2_8_78_249	101.3	0	-1
Etoposide_AML_control_r2_8_78_179	101.3	0	-1
Etoposide_AML_control_r2_6_52_132	101.22	-142.82	-0.05
Etoposide_AML_control_r2_6_52_105	101.22	-142.82	-282.47
Etoposide_AML_control_6_7_18	101.09	0	-1
Etoposide_AML_control_6_7_17	101.09	0	-1
Etoposide_AML_control_4_21_49	101.09	0	-154.17
Etoposide_AML_control_4_21_45	101.09	0	-181.58
Etoposide_AML_control_r2_9_77_168	100.53	-142.82	-345.58
Etoposide_AML_control_r2_9_77_253	100.53	-142.82	-347.92
Etoposide_AML_control_5_15_33	100.32	0	-9.62
Etoposide_AML_control_5_15_39	100.32	0	-92.16
Etoposide_AML_control_r2_4_6_14	99.68	-142.82	-130.44
Etoposide_AML_control_r2_4_6_14	99.68	-142.82	-161.45
Etoposide_AML_control_r2_6_39_102	99.42	-142.82	-244.66
Etoposide_AML_control_r2_6_39_80	99.42	-142.82	-326.49
Etoposide_AML_control_6_21_55	95.23	-142.82	-366.13
Etoposide_AML_control_6_21_48	95.23	-142.82	-384.05
Etoposide_AML_control_7_5_13	94.94	0	-293.39
Etoposide_AML_control_7_5_9	94.94	0	-310.74
Etoposide_AML_control_r2_5_30_65	94.85	-142.82	-331.35
Etoposide_AML_control_r2_5_30_81	94.85	-142.82	-335.45
Etoposide_AML_control_7_77_159	94.29	0	-369.59
Etoposide_AML_control_7_77_218	94.29	0	-380.55
Etoposide_AML_control_4_50_103	94.28	0	-339.05
Etoposide_AML_control_4_50_113	94.28	0	-371.27
Etoposide_AML_control_6_76_154	93.1	-142.82	-341.18
Etoposide_AML_control_6_76_186	93.1	-142.82	-379.31
Etoposide_AML_control_r2_4_61_136	92.86	-142.82	-364.55
Etoposide_AML_control_r2_4_61_152	92.86	-142.82	-372.71
Etoposide_AML_control_r2_4_48_125	92.85	0	-30.89
Etoposide_AML_control_r2_4_48_109	92.85	0	-37.17
Etoposide_AML_control_5_56_113	92.62	0	-281.77
Etoposide_AML_control_5_56_138	92.62	0	-303.42
Etoposide_AML_control_3_91_243	92.4	-285.64	-216.57
Etoposide_AML_control_3_91_176	92.4	-285.64	-308.92
Etoposide_AML_control_r2_5_18_57	91.32	0	-1
Etoposide_AML_control_r2_5_18_43	91.32	0	-1
Etoposide_AML_control_r2_4_44_100	91.22	-142.82	-315.87
Etoposide_AML_control_r2_4_44_114	91.22	-142.82	-379.06
Etoposide_AML_control_r2_1_47_164	89.36	0	1
Etoposide_AML_control_r2_1_47_107	89.36	-285.64	1
Etoposide_AML_control_2_35_68	89.26	-142.82	-340.75
Etoposide_AML_control_2_35_88	89.26	-142.82	-351.14
Etoposide_AML_control_r2_4_47_106	89.12	-142.82	-8.62
Etoposide_AML_control_r2_4_47_122	89.12	-142.82	-299.89
Etoposide_AML_control_6_35_89	88.59	-142.82	-314.38
Etoposide_AML_control_6_35_74	88.59	-142.82	-372.76
Etoposide_AML_control_r2_8_23_71	88.55	-142.82	-1
Etoposide_AML_control_r2_8_23_50	88.55	-142.82	-1
Etoposide_AML_control_6_10_26	86.97	-142.82	-260.06
Etoposide_AML_control_6_10_23	86.97	-142.82	-303.92
Etoposide_AML_control_6_26_58	85.85	-142.82	-283.92
Etoposide_AML_control_6_26_68	85.85	-142.82	-310.77
Etoposide_AML_control_r2_9_58_197	85.63	0	-1
Etoposide_AML_control_r2_9_58_126	85.63	0	-1
Etoposide_AML_control_4_85_171	84.32	0	1
Etoposide_AML_control_4_85_191	84.32	0	-306.08
Etoposide_AML_control_1_97_193	83.45	0	-130.81
Etoposide_AML_control_1_97_266	83.45	0	-137.76
Etoposide_AML_control_r2_6_89_229	80.45	-142.82	-1
Etoposide_AML_control_r2_6_89_186	80.45	-142.82	-1
Etoposide_AML_control_r2_5_25_57	80.28	0	-228
Etoposide_AML_control_r2_5_25_73	80.28	0	-297.35
Etoposide_AML_control_r2_8_15_43	79.65	-142.82	-236.15
Etoposide_AML_control_r2_8_15_28	79.65	-142.82	-256.66
Etoposide_AML_control_7_57_164	79.64	-142.82	-324.45
Etoposide_AML_control_7_57_116	79.64	-142.82	-402.2
Etoposide_AML_control_3_21_34	78.93	-142.82	-360.8
Etoposide_AML_control_3_21_55	78.93	-142.82	-383.9
Etoposide_AML_control_r2_3_95_215	78.92	0	-264.63
Etoposide_AML_control_r2_3_95_286	78.92	0	-299.6
Etoposide_AML_control_r2_9_3_9	78.13	0	-1
Etoposide_AML_control_r2_9_3_6	78.13	0	-1
Etoposide_AML_control_r2_3_44_140	77.71	-142.82	-1
Etoposide_AML_control_r2_3_44_101	77.71	0	-1
Etoposide_AML_control_3_35_60	74.95	-142.82	-27.35
Etoposide_AML_control_3_35_90	74.95	-142.82	-353.37
Etoposide_AML_control_r2_8_32_104	72.78	-142.82	-280.3
Etoposide_AML_control_r2_8_32_74	72.78	-142.82	-304.13
Etoposide_AML_control_r2_6_71_147	71.53	-142.82	-75.21
Etoposide_AML_control_r2_6_71_185	71.53	-142.82	-128
Etoposide_AML_control_r2_2_56_124	71.41	-142.82	-176.09
Etoposide_AML_control_r2_2_56_164	71.41	-142.82	-217.62
Etoposide_AML_control_6_73_149	70.68	0	-103.8
Etoposide_AML_control_6_73_179	70.68	0	-141.79
Etoposide_AML_control_r2_5_4_15	70.54	-142.82	-256.14
Etoposide_AML_control_r2_5_4_11	70.54	-142.82	-262.42
Etoposide_AML_control_r2_8_97_295	69.6	0	1
Etoposide_AML_control_r2_8_97_213	69.6	0	1
Etoposide_AML_control_r2_3_3_10	63.35	-142.82	-187.08
Etoposide_AML_control_r2_3_3_8	63.35	-142.82	-208.26
Etoposide_AML_control_r2_6_39_79	59.5	0	-247.92
Etoposide_AML_control_r2_6_39_103	59.5	0	-301.05
Etoposide_AML_control_6_17_47	58.03	0	-322.4
Etoposide_AML_control_6_17_40	58.03	0	-366.88
Etoposide_AML_control_r2_5_93_186	57.98	-142.82	-17.35
Etoposide_AML_control_r2_5_93_231	57.98	-142.82	-344.44
Etoposide_AML_control_1_71_142	57.41	0	-261.53
Etoposide_AML_control_1_71_200	57.41	-428.46	-279.4
Etoposide_AML_control_4_45_93	57.4	-142.82	-335.64
Etoposide_AML_control_4_45_101	57.4	-142.82	-370.11
Etoposide_AML_control_2_36_91	57.27	0	-20.68
Etoposide_AML_control_2_36_70	57.27	0	-46.53
Etoposide_AML_control_r2_6_83_215	56.15	0	-1
Etoposide_AML_control_r2_6_83_175	56.15	0	-1
Etoposide_AML_control_r2_7_23_49	55.91	-142.82	-334.31
Etoposide_AML_control_r2_7_23_85	55.91	-142.82	-358
Etoposide_AML_control_4_39_82	55.81	0	-324.22
Etoposide_AML_control_4_39_88	55.81	0	-378.19
Etoposide_AML_control_r2_5_53_111	53.79	0	-37.17
Etoposide_AML_control_r2_5_53_139	53.79	0	-79.21
Etoposide_AML_control_r2_9_47_159	44.84	0	1
Etoposide_AML_control_r2_9_47_100	44.84	0	1
Etoposide_AML_control_7_38_110	43.55	-142.82	-300.86
Etoposide_AML_control_7_38_79	43.55	-142.82	-336.94
Etoposide_AML_control_6_44_111	43.07	0	-1
Etoposide_AML_control_6_44_91	43.07	0	-1
Etoposide_AML_control_6_68_139	42.72	-142.82	-99.1
Etoposide_AML_control_6_68_167	42.72	-142.82	-107.78
Etoposide_AML_control_4_61_139	31.55	-142.82	-53.24
Etoposide_AML_control_4_61_124	31.55	-142.82	-73.98
Etoposide_AML_control_5_65_131	20.27	-142.82	-226.18
Etoposide_AML_control_5_65_161	20.27	-142.82	-238.06

## Sheet: exp_1
Signal number	physical_distance	ellipsoid_distance	distance_to_surface
Etoposide_AML_180min_2_71_168	1772.52	428.46	200.68
Etoposide_AML_180min_2_71_138	1772.52	0	-1
Etoposide_AML_0min_4_74_186	1748.52	0	-358.82
Etoposide_AML_0min_4_74_163	1748.52	0	-387.01
Etoposide_AML_180min_2_23_48	1732.7	-428.46	-1
Etoposide_AML_180min_2_23_51	1732.7	-142.82	-308.74
Etoposide_AML_0min_6_76_192	1689.17	0	-1
Etoposide_AML_0min_6_76_156	1689.17	-142.82	-1
Etoposide_AML_180min_5_65_167	1686.48	0	-1
Etoposide_AML_180min_5_65_142	1686.48	-428.46	-58.69
Etoposide_AML_180min_6_54_112	1612.25	0	-1
Etoposide_AML_180min_6_54_155	1612.25	-142.82	-216.76
Etoposide_AML_180min_5_77_165	1525.39	-142.82	-147.11
Etoposide_AML_180min_5_77_201	1525.39	-142.82	-248.93
Etoposide_AML_180min_6_17_52	1471.3	0	252.03
Etoposide_AML_180min_6_17_35	1471.3	-142.82	-263.77
Etoposide_AML_0min_7_94_197	1420.26	0	-1
Etoposide_AML_0min_7_94_248	1420.26	0	-186.34
Etoposide_AML_180min_1_42_69	1395.78	-142.82	-201.25
Etoposide_AML_180min_1_42_94	1395.78	-142.82	-312.44
Etoposide_AML_180min_1_48_108	1345.93	0	-148.94
Etoposide_AML_180min_1_48_79	1345.93	-142.82	-268.59
Etoposide_AML_0min_7_43_90	1284.34	0	-242.65
Etoposide_AML_0min_7_43_122	1284.34	0	-358.5
Etoposide_AML_0min_7_80_165	1274.48	-142.82	-140.12
Etoposide_AML_0min_7_80_213	1274.48	0	-314.01
Etoposide_AML_180min_6_91_188	1253.44	-142.82	-199.07
Etoposide_AML_180min_6_91_252	1253.44	-142.82	-285.26
Etoposide_AML_180min_6_79_220	1178.58	-142.82	-1
Etoposide_AML_180min_6_79_164	1178.58	0	-186.02
Etoposide_AML_180min_1_48_107	1150.5	0	-71.17
Etoposide_AML_180min_1_48_78	1150.5	0	-81.23
Etoposide_AML_0min_2_51_167	1114.57	-142.82	-104.47
Etoposide_AML_0min_2_51_100	1114.57	-142.82	-229.29
Etoposide_AML_0min_7_55_115	1110.53	0	-8.55
Etoposide_AML_0min_7_55_154	1110.53	-142.82	-246.83
Etoposide_AML_180min_5_82_213	1049.61	0	-33.97
Etoposide_AML_180min_5_82_174	1049.61	0	-220.08
Etoposide_AML_90min_3_62_138	1046.03	-142.82	-76.21
Etoposide_AML_90min_3_62_154	1046.03	-142.82	-264.04
Etoposide_AML_0min_1_87_194	1044.62	-142.82	-1
Etoposide_AML_0min_1_87_289	1044.62	-142.82	-311.3
Etoposide_AML_180min_6_72_207	1011.37	428.46	414.16
Etoposide_AML_180min_6_72_150	1011.37	0	-1
Etoposide_AML_0min_3_66_135	1001.44	0	-1
Etoposide_AML_0min_3_66_200	1001.44	-142.82	-327.58
Etoposide_AML_180min_4_32_68	986.12	0	-17
Etoposide_AML_180min_4_32_62	986.12	0	-38.79
Etoposide_AML_0min_7_79_163	985.2	-142.82	-52.05
Etoposide_AML_0min_7_79_210	985.2	-142.82	-212.4
Etoposide_AML_90min_5_73_167	950.59	-428.46	1
Etoposide_AML_90min_5_73_141	950.59	-142.82	-162.49
Etoposide_AML_90min_5_80_157	930.27	0	-221.49
Etoposide_AML_90min_5_80_183	930.27	0	-271.54
Etoposide_AML_180min_7_67_144	883.91	0	-27.23
Etoposide_AML_180min_7_67_213	883.91	-142.82	-116.11
Etoposide_AML_90min_1_69_177	880.07	-142.82	-240.03
Etoposide_AML_90min_1_69_134	880.07	-142.82	-303.43
Etoposide_AML_0min_3_59_122	863.99	-142.82	-267.87
Etoposide_AML_0min_3_59_183	863.99	0	-277.97
Etoposide_AML_0min_6_48_105	853.59	-142.82	-35.9
Etoposide_AML_0min_6_48_138	853.59	-142.82	-334.47
Etoposide_AML_0min_5_13_24	817.89	-142.82	-97.49
Etoposide_AML_0min_5_13_31	817.89	0	-322.95
Etoposide_AML_0min_6_81_168	780.18	0	-325.89
Etoposide_AML_0min_6_81_202	780.18	0	-392.89
Etoposide_AML_180min_2_42_91	771.39	0	-198.22
Etoposide_AML_180min_2_42_102	771.39	-142.82	-364.91
Etoposide_AML_0min_7_65_175	763.81	0	-255.37
Etoposide_AML_0min_7_65_134	763.81	0	-327.41
Etoposide_AML_90min_1_73_186	737.83	-142.82	-1
Etoposide_AML_90min_1_73_141	737.83	0	-239.3
Etoposide_AML_0min_6_91_227	727.35	0	-89.58
Etoposide_AML_0min_6_91_189	727.35	0	-310.39
Etoposide_AML_90min_5_66_129	721.46	-285.64	-118.4
Etoposide_AML_90min_5_66_152	721.46	-142.82	-236.52
Etoposide_AML_180min_6_30_89	710.87	0	-1
Etoposide_AML_180min_6_30_64	710.87	-142.82	-1
Etoposide_AML_90min_4_78_187	686.59	-285.64	1
Etoposide_AML_90min_4_78_157	686.59	-428.46	-79.85
Etoposide_AML_180min_6_17_53	686.51	-142.82	-107.22
Etoposide_AML_180min_6_17_36	686.51	0	-388.36
Etoposide_AML_180min_6_74_153	682.54	-142.82	-1
Etoposide_AML_180min_6_74_210	682.54	-142.82	-58.76
Etoposide_AML_90min_3_5_11	681.3	0	1
Etoposide_AML_90min_3_5_11	681.3	-285.64	-1
Etoposide_AML_180min_6_83_173	678.39	0	-12.44
Etoposide_AML_180min_6_83_233	678.39	0	-406.62
Etoposide_AML_0min_7_53_148	666.6	0	-1
Etoposide_AML_0min_7_53_111	666.6	-142.82	-1
Etoposide_AML_0min_6_66_178	666.35	0	-123.12
Etoposide_AML_0min_6_66_138	666.35	0	-293.6
Etoposide_AML_90min_4_2_5	660.25	-142.82	-2.28
Etoposide_AML_90min_4_2_5	660.25	-142.82	-269.95
Etoposide_AML_180min_3_32_53	656.91	0	-1
Etoposide_AML_180min_3_32_86	656.91	0	-1
Etoposide_AML_90min_1_59_115	650	0	-100.1
Etoposide_AML_90min_1_59_150	650	0	-185.55
Etoposide_AML_90min_8_52_145	644.82	-142.82	-21.37
Etoposide_AML_90min_8_52_106	644.82	0	-105.56
Etoposide_AML_90min_9_4_11	644.8	-428.46	-1
Etoposide_AML_90min_9_4_9	644.8	0	-1
Etoposide_AML_90min_2_31_64	639.42	0	-56.72
Etoposide_AML_90min_2_31_82	639.42	-142.82	-184.18
Etoposide_AML_90min_3_78_188	634.82	0	-192.2
Etoposide_AML_90min_3_78_171	634.82	-142.82	-352.35
Etoposide_AML_90min_5_23_51	624.09	-142.82	-13.73
Etoposide_AML_90min_5_23_43	624.09	0	-122.31
Etoposide_AML_0min_7_80_166	619.82	-142.82	-196.51
Etoposide_AML_0min_7_80_212	619.82	0	-211.87
Etoposide_AML_0min_4_75_187	619.67	-142.82	-96.27
Etoposide_AML_0min_4_75_164	619.67	-142.82	-179.93
Etoposide_AML_180min_6_45_128	619.56	0	-1
Etoposide_AML_180min_6_45_91	619.56	-142.82	-353.07
Etoposide_AML_90min_2_76_192	612	0	1
Etoposide_AML_90min_2_76_152	612	-142.82	-1
Etoposide_AML_180min_4_42_83	608.58	142.82	399.13
Etoposide_AML_180min_4_42_92	608.58	285.64	141.05
Etoposide_AML_90min_3_76_166	608.56	-142.82	-198.22
Etoposide_AML_90min_3_76_184	608.56	-142.82	-366.07
Etoposide_AML_180min_4_40_88	603.35	-142.82	-124.01
Etoposide_AML_180min_4_40_79	603.35	0	-404.12
Etoposide_AML_180min_2_40_87	601.08	0	-172.43
Etoposide_AML_180min_2_40_97	601.08	0	-387.11
Etoposide_AML_0min_6_86_216	599.47	0	-1
Etoposide_AML_0min_6_86_178	599.47	0	-1
Etoposide_AML_0min_3_79_233	593.49	0	-199.7
Etoposide_AML_0min_3_79_164	593.49	-142.82	-334.19
Etoposide_AML_180min_5_93_239	590.23	-142.82	-239.71
Etoposide_AML_180min_5_93_198	590.23	0	-327.91
Etoposide_AML_0min_5_41_84	588.59	0	-58.01
Etoposide_AML_0min_5_41_107	588.59	0	-287.26
Etoposide_AML_90min_5_49_112	587.4	428.46	272.84
Etoposide_AML_90min_5_49_93	587.4	0	-1.28
Etoposide_AML_0min_5_62_125	584.44	0	-53.35
Etoposide_AML_0min_5_62_154	584.44	-142.82	-338.29
Etoposide_AML_90min_3_54_137	577.72	-142.82	-216.91
Etoposide_AML_90min_3_54_124	577.72	-142.82	-266.21
Etoposide_AML_90min_9_91_274	576.91	0	-107.16
Etoposide_AML_90min_9_91_188	576.91	0	-247.49
Etoposide_AML_0min_3_86_251	576.54	-142.82	-166.32
Etoposide_AML_0min_3_86_177	576.54	-142.82	-293.21
Etoposide_AML_180min_2_64_154	576.48	0	1
Etoposide_AML_180min_2_64_126	576.48	0	-348.43
Etoposide_AML_0min_6_55_155	568.51	0	-232.32
Etoposide_AML_0min_6_55_118	568.51	0	-268.05
Etoposide_AML_180min_4_18_32	554.67	0	-12.44
Etoposide_AML_180min_4_18_40	554.67	-142.82	-399.28
Etoposide_AML_0min_5_83_170	553.17	-285.64	-1
Etoposide_AML_0min_5_83_198	553.17	0	-75.27
Etoposide_AML_90min_5_20_38	552.56	-142.82	-4.74
Etoposide_AML_90min_5_20_45	552.56	-428.46	-205.22
Etoposide_AML_90min_9_59_124	548.77	-142.82	-14.56
Etoposide_AML_90min_9_59_179	548.77	0	-296.14
Etoposide_AML_0min_4_18_39	543.66	0	-14.2
Etoposide_AML_0min_4_18_49	543.66	0	-205.85
Etoposide_AML_180min_1_6_14	543.07	-142.82	-168.67
Etoposide_AML_180min_1_6_12	543.07	-142.82	-346.06
Etoposide_AML_180min_2_42_92	538.1	0	-6.45
Etoposide_AML_180min_2_42_101	538.1	0	-396.39
Etoposide_AML_180min_2_7_11	537.63	0	-153.36
Etoposide_AML_180min_2_7_15	537.63	-142.82	-345.74
Etoposide_AML_0min_7_62_171	532.58	-142.82	-5.6
Etoposide_AML_0min_7_62_129	532.58	-142.82	-267.55
Etoposide_AML_0min_5_64_157	532.35	0	1
Etoposide_AML_0min_5_64_130	532.35	-142.82	-78.82
Etoposide_AML_180min_2_47_114	520.48	-142.82	-219.88
Etoposide_AML_180min_2_47_100	520.48	0	-300.19
Etoposide_AML_0min_4_18_48	518.16	0	-1
Etoposide_AML_0min_4_18_38	518.16	-142.82	-1
Etoposide_AML_0min_4_50_110	516.12	0	-57.98
Etoposide_AML_0min_4_50_127	516.12	0	-375.44
Etoposide_AML_180min_2_96_176	514.48	0	-124.56
Etoposide_AML_180min_2_96_216	514.48	0	-263.49
Etoposide_AML_180min_3_62_95	508.72	-142.82	-193.91
Etoposide_AML_180min_3_62_154	508.72	0	-246.49
Etoposide_AML_180min_5_80_208	508.57	0	-78.64
Etoposide_AML_180min_5_80_170	508.57	0	-330.75
Etoposide_AML_90min_5_55_106	505.64	-285.64	-171.01
Etoposide_AML_90min_5_55_128	505.64	0	-235.6
Etoposide_AML_90min_8_8_19	504.94	0	-231.12
Etoposide_AML_90min_8_8_22	504.94	-142.82	-254.36
Etoposide_AML_90min_6_64_139	504.91	0	-61.36
Etoposide_AML_90min_6_64_186	504.91	0	-184.95
Etoposide_AML_90min_4_71_169	504.32	0	1
Etoposide_AML_90min_4_71_143	504.32	0	-1
Etoposide_AML_90min_3_78_170	501.69	0	-105.87
Etoposide_AML_90min_3_78_187	501.69	-142.82	-276.36
Etoposide_AML_180min_5_93_240	500.67	0	-11.16
Etoposide_AML_180min_5_93_199	500.67	-142.82	-27.79
Etoposide_AML_90min_2_38_80	500.02	0	-41.4
Etoposide_AML_90min_2_38_102	500.02	0	-48.53
Etoposide_AML_0min_5_64_156	498.23	0	-45.27
Etoposide_AML_0min_5_64_129	498.23	-142.82	-162.75
Etoposide_AML_90min_6_90_269	497.63	-142.82	-74.92
Etoposide_AML_90min_6_90_201	497.63	0	-186.48
Etoposide_AML_180min_6_11_33	495.73	-142.82	-1
Etoposide_AML_180min_6_11_23	495.73	-142.82	-287.34
Etoposide_AML_90min_3_39_89	492.85	-142.82	-244.64
Etoposide_AML_90min_3_39_99	492.85	-142.82	-363.38
Etoposide_AML_0min_1_88_292	492.68	0	-1
Etoposide_AML_0min_1_88_196	492.68	-142.82	-1
Etoposide_AML_180min_7_89_186	491.91	0	-219.34
Etoposide_AML_180min_7_89_269	491.91	-142.82	-225.13
Etoposide_AML_90min_3_89_213	489.33	142.82	-1
Etoposide_AML_90min_3_89_193	489.33	-142.82	-461.43
Etoposide_AML_0min_6_76_193	488.96	-142.82	-1
Etoposide_AML_0min_6_76_157	488.96	0	-1
Etoposide_AML_0min_4_59_131	487.97	0	-1
Etoposide_AML_0min_4_59_151	487.97	0	-318.27
Etoposide_AML_90min_8_88_180	487.86	-142.82	-121.8
Etoposide_AML_90min_8_88_237	487.86	-142.82	-186.05
Etoposide_AML_180min_2_85_163	486.82	-428.46	-1
Etoposide_AML_180min_2_85_195	486.82	0	-1
Etoposide_AML_0min_7_45_94	484.5	-142.82	-216.45
Etoposide_AML_0min_7_45_125	484.5	0	-238.05
Etoposide_AML_0min_6_79_165	482.81	-142.82	-111.82
Etoposide_AML_0min_6_79_198	482.81	-142.82	-267.04
Etoposide_AML_180min_5_91_235	481.01	-142.82	-1
Etoposide_AML_180min_5_91_195	481.01	-142.82	-263.47
Etoposide_AML_180min_2_84_161	480.65	0	-86.63
Etoposide_AML_180min_2_84_193	480.65	0	-130.19
Etoposide_AML_0min_1_63_220	478.94	0	-198.73
Etoposide_AML_0min_1_63_142	478.94	0	-249.54
Etoposide_AML_0min_6_58_163	477.9	0	-1
Etoposide_AML_0min_6_58_123	477.9	0	-1
Etoposide_AML_0min_7_24_55	477.68	0	-25.59
Etoposide_AML_0min_7_24_70	477.68	0	-372.05
Etoposide_AML_0min_4_44_100	477.22	0	-61.41
Etoposide_AML_0min_4_44_114	477.22	0	-331.31
Etoposide_AML_0min_6_22_62	476.79	-142.82	-99.51
Etoposide_AML_0min_6_22_46	476.79	-142.82	-202.25
Etoposide_AML_0min_3_79_163	475.93	-142.82	-189.44
Etoposide_AML_0min_3_79_234	475.93	-142.82	-256.28
Etoposide_AML_0min_6_69_144	472.98	0	-130.18
Etoposide_AML_0min_6_69_184	472.98	0	-220.99
Etoposide_AML_90min_3_64_142	471.54	0	1
Etoposide_AML_90min_3_64_157	471.54	0	-256.04
Etoposide_AML_90min_4_35_91	470.73	0	-311.49
Etoposide_AML_90min_4_35_72	470.73	-142.82	-316.04
Etoposide_AML_180min_1_31_71	470.59	0	-29.9
Etoposide_AML_180min_1_31_52	470.59	0	-66.11
Etoposide_AML_90min_5_87_169	470.24	0	-2.01
Etoposide_AML_90min_5_87_199	470.24	0	-320.9
Etoposide_AML_0min_4_41_90	467.55	0	-91.83
Etoposide_AML_0min_4_41_106	467.55	0	-373.97
Etoposide_AML_180min_6_50_104	466.57	0	-201.14
Etoposide_AML_180min_6_50_145	466.57	0	-355.05
Etoposide_AML_180min_5_44_117	466.37	-142.82	-5.57
Etoposide_AML_180min_5_44_96	466.37	0	-297.57
Etoposide_AML_90min_4_50_100	465.7	-142.82	-237.91
Etoposide_AML_90min_4_50_122	465.7	-142.82	-358.13
Etoposide_AML_180min_6_2_4	464.72	0	-12.08
Etoposide_AML_180min_6_2_8	464.72	0	-416.22
Etoposide_AML_0min_5_88_178	464.71	-142.82	-44.2
Etoposide_AML_0min_5_88_211	464.71	-142.82	-364.81
Etoposide_AML_90min_6_40_112	463.96	0	-1
Etoposide_AML_90min_6_40_85	463.96	0	-1
Etoposide_AML_90min_3_52_132	462.17	-142.82	-99.65
Etoposide_AML_90min_3_52_119	462.17	0	-319.64
Etoposide_AML_90min_3_52_120	462.12	0	-206.39
Etoposide_AML_90min_3_52_133	462.12	-142.82	-212.38
Etoposide_AML_90min_3_43_97	461.1	-142.82	-64.43
Etoposide_AML_90min_3_43_108	461.1	-142.82	-332.4
Etoposide_AML_180min_3_32_87	459.79	-142.82	-22
Etoposide_AML_180min_3_32_54	459.79	0	-394.4
Etoposide_AML_90min_1_60_152	458.56	-142.82	-228.38
Etoposide_AML_90min_1_60_117	458.56	-142.82	-301.33
Etoposide_AML_0min_1_55_123	456.64	-142.82	-78.8
Etoposide_AML_0min_1_55_192	456.64	-428.46	-251.19
Etoposide_AML_0min_5_53_132	456.25	428.46	332.68
Etoposide_AML_0min_5_53_107	456.25	0	-201.06
Etoposide_AML_180min_6_5_11	456.16	0	-355.9
Etoposide_AML_180min_6_5_15	456.16	0	-414.62
Etoposide_AML_0min_4_65_143	454.67	0	-1
Etoposide_AML_0min_4_65_167	454.67	0	-72.14
Etoposide_AML_90min_1_5_10	453.18	0	1
Etoposide_AML_90min_1_5_12	453.18	0	-68.96
Etoposide_AML_0min_7_61_169	452.85	0	-243.61
Etoposide_AML_0min_7_61_127	452.85	-142.82	-312.14
Etoposide_AML_180min_5_65_141	449.98	0	-151.27
Etoposide_AML_180min_5_65_168	449.98	-142.82	-254.92
Etoposide_AML_180min_6_65_135	449.94	-142.82	-46.28
Etoposide_AML_180min_6_65_189	449.94	0	-389.46
Etoposide_AML_90min_4_2_6	449.71	0	-1
Etoposide_AML_90min_4_2_4	449.71	-142.82	-241.17
Etoposide_AML_180min_6_78_163	449.44	0	-202.62
Etoposide_AML_180min_6_78_219	449.44	-142.82	-300.78
Etoposide_AML_90min_3_92_198	445.64	-142.82	1
Etoposide_AML_90min_3_92_219	445.64	0	-230.01
Etoposide_AML_180min_6_79_221	445.13	0	-1
Etoposide_AML_180min_6_79_165	445.13	0	-1
Etoposide_AML_180min_4_86_201	444.96	0	1
Etoposide_AML_180min_4_86_176	444.96	0	-1
Etoposide_AML_180min_4_93_218	443.98	0	-282.22
Etoposide_AML_180min_4_93_190	443.98	0	-306.26
Etoposide_AML_180min_2_64_125	441.89	-142.82	0
Etoposide_AML_180min_2_64_153	441.89	0	-309.31
Etoposide_AML_180min_4_17_39	441.82	-142.82	-37.89
Etoposide_AML_180min_4_17_29	441.82	0	-92.2
Etoposide_AML_180min_5_81_210	441.45	-142.82	-1
Etoposide_AML_180min_5_81_173	441.45	0	-134.45
Etoposide_AML_0min_5_49_125	437	-142.82	-359.79
Etoposide_AML_0min_5_49_100	437	-142.82	-361.2
Etoposide_AML_90min_1_22_43	436.4	0	-104.11
Etoposide_AML_90min_1_22_55	436.4	0	-253.68
Etoposide_AML_0min_3_87_179	435.42	0	-27.07
Etoposide_AML_0min_3_87_254	435.42	0	-321.86
Etoposide_AML_180min_5_3_6	434.67	0	-1
Etoposide_AML_180min_5_3_9	434.67	0	-305.82
Etoposide_AML_180min_1_29_51	433.49	-142.82	-82.63
Etoposide_AML_180min_1_29_66	433.49	-142.82	-226.68
Etoposide_AML_90min_1_73_187	432.92	0	1
Etoposide_AML_90min_1_73_142	432.92	0	-86.49
Etoposide_AML_90min_7_82_255	432.5	0	-153.06
Etoposide_AML_90min_7_82_166	432.5	0	-236.78
Etoposide_AML_90min_6_41_114	430.85	-142.82	-101.67
Etoposide_AML_90min_6_41_86	430.85	0	-325.24
Etoposide_AML_90min_7_82_167	430.32	0	-122.03
Etoposide_AML_90min_7_82_256	430.32	0	-158.6
Etoposide_AML_90min_1_48_124	429.93	0	-192.51
Etoposide_AML_90min_1_48_95	429.93	-142.82	-322.87
Etoposide_AML_0min_6_69_145	429.12	0	-153.41
Etoposide_AML_0min_6_69_183	429.12	0	-215.06
Etoposide_AML_0min_2_72_142	428.21	0	-143.5
Etoposide_AML_0min_2_72_229	428.21	-142.82	-266.92
Etoposide_AML_180min_3_54_84	427.64	-142.82	-1
Etoposide_AML_180min_3_54_136	427.64	-142.82	-1
Etoposide_AML_0min_6_51_146	427.35	0	1
Etoposide_AML_0min_6_51_111	427.35	0	-1
Etoposide_AML_180min_6_63_184	426.04	0	-276.29
Etoposide_AML_180min_6_63_131	426.04	0	-353.44
Etoposide_AML_180min_4_49_104	424.3	-142.82	-114.8
Etoposide_AML_180min_4_49_114	424.3	-142.82	-305.45
Etoposide_AML_180min_5_40_108	422.48	0	-46.62
Etoposide_AML_180min_5_40_89	422.48	0	-321.15
Etoposide_AML_0min_4_52_134	420.98	-428.46	-77.51
Etoposide_AML_0min_4_52_115	420.98	-285.64	-239.59
Etoposide_AML_0min_5_13_32	419.22	-142.82	-41.58
Etoposide_AML_0min_5_13_23	419.22	-142.82	-250.79
Etoposide_AML_90min_1_76_195	417.97	-142.82	-1
Etoposide_AML_90min_1_76_147	417.97	-142.82	-1
Etoposide_AML_90min_3_44_110	417.19	0	-1
Etoposide_AML_90min_3_44_100	417.19	0	-1
Etoposide_AML_0min_5_57_142	415.51	0	1
Etoposide_AML_0min_5_57_115	415.51	-142.82	-1
Etoposide_AML_180min_4_93_189	415.47	0	-253.41
Etoposide_AML_180min_4_93_217	415.47	-142.82	-301.73
Etoposide_AML_180min_1_49_110	414.48	0	-104.98
Etoposide_AML_180min_1_49_81	414.48	0	-208.73
Etoposide_AML_90min_5_84_162	413.09	-142.82	-76.37
Etoposide_AML_90min_5_84_191	413.09	-142.82	-150.68
Etoposide_AML_90min_7_95_291	413.07	-142.82	-1
Etoposide_AML_90min_7_95_193	413.07	-142.82	-1
Etoposide_AML_180min_3_52_131	412.75	0	-160.71
Etoposide_AML_180min_3_52_82	412.75	0	-363.57
Etoposide_AML_180min_2_89_202	412.33	0	1
Etoposide_AML_180min_2_89_168	412.33	0	-400.24
Etoposide_AML_90min_7_97_297	412	-142.82	-71.62
Etoposide_AML_90min_7_97_198	412	-142.82	-388.77
Etoposide_AML_0min_4_19_50	411.1	-142.82	-325.17
Etoposide_AML_0min_4_19_40	411.1	-142.82	-348.66
Etoposide_AML_90min_2_84_211	410	0	-189.09
Etoposide_AML_90min_2_84_166	410	0	-275.09
Etoposide_AML_90min_9_4_10	409.61	-142.82	-17.9
Etoposide_AML_90min_9_4_12	409.61	-142.82	-221.74
Etoposide_AML_0min_6_55_117	408.18	0	1
Etoposide_AML_0min_6_55_156	408.18	0	-26.89
Etoposide_AML_90min_5_53_124	408.18	0	-240.74
Etoposide_AML_90min_5_53_101	408.18	-142.82	-297.15
Etoposide_AML_90min_2_55_139	408.04	0	-164.43
Etoposide_AML_90min_2_55_110	408.04	0	-291.4
Etoposide_AML_0min_4_67_146	407.28	-142.82	-28.15
Etoposide_AML_0min_4_67_171	407.28	0	-343.14
Etoposide_AML_90min_5_55_127	406.71	0	-1
Etoposide_AML_90min_5_55_105	406.71	0	-1
Etoposide_AML_0min_5_90_214	406.56	0	1
Etoposide_AML_0min_5_90_182	406.56	0	-287.85
Etoposide_AML_90min_3_17_42	406.23	-142.82	97.23
Etoposide_AML_90min_3_17_37	406.23	-142.82	-70.97
Etoposide_AML_90min_5_27_51	406.22	0	1
Etoposide_AML_90min_5_27_59	406.22	0	-380.52
Etoposide_AML_90min_2_10_21	403.21	-142.82	-49.23
Etoposide_AML_90min_2_10_26	403.21	-142.82	-261.1
Etoposide_AML_180min_1_9_17	400.97	0	-179.97
Etoposide_AML_180min_1_9_20	400.97	-142.82	-215.94
Etoposide_AML_180min_5_58_130	400.87	0	-74.77
Etoposide_AML_180min_5_58_152	400.87	0	-159.39
Etoposide_AML_90min_5_44_83	400.83	0	-122.18
Etoposide_AML_90min_5_44_99	400.83	0	-238.33
Etoposide_AML_180min_1_35_58	399.98	428.46	147.04
Etoposide_AML_180min_1_35_80	399.98	0	-263.51
Etoposide_AML_0min_6_96_203	399.97	-142.82	-136.98
Etoposide_AML_0min_6_96_243	399.97	0	-155.17
Etoposide_AML_0min_2_72_230	398.55	0	-113.02
Etoposide_AML_0min_2_72_141	398.55	0	-122.7
Etoposide_AML_180min_6_91_253	396.72	0	-31.35
Etoposide_AML_180min_6_91_189	396.72	0	-107.18
Etoposide_AML_90min_7_43_132	396.45	0	-223.48
Etoposide_AML_90min_7_43_88	396.45	0	-281.64
Etoposide_AML_90min_6_29_65	394.04	0	-1
Etoposide_AML_90min_6_29_79	394.04	-428.46	-39.68
Etoposide_AML_0min_5_53_133	391.88	-142.82	-240.09
Etoposide_AML_0min_5_53_108	391.88	-142.82	-264.41
Etoposide_AML_90min_4_47_95	391.16	0	-38.06
Etoposide_AML_90min_4_47_117	391.16	-142.82	-101.83
Etoposide_AML_0min_7_88_232	390.9	-142.82	-1
Etoposide_AML_0min_7_88_184	390.9	-142.82	-1
Etoposide_AML_0min_5_76_154	389.46	-142.82	-345.89
Etoposide_AML_0min_5_76_181	389.46	0	-375.26
Etoposide_AML_90min_7_97_197	389.45	-142.82	-1
Etoposide_AML_90min_7_97_298	389.45	-428.46	-336.52
Etoposide_AML_0min_4_98_209	387.98	0	-319.76
Etoposide_AML_0min_4_98_243	387.98	0	-425.35
Etoposide_AML_180min_4_55_114	387.68	0	-264.99
Etoposide_AML_180min_4_55_124	387.68	0	-312.17
Etoposide_AML_180min_2_23_49	387.21	0	-1
Etoposide_AML_180min_2_23_52	387.21	-142.82	-1
Etoposide_AML_90min_7_90_280	386.82	-142.82	-364.1
Etoposide_AML_90min_7_90_184	386.82	-142.82	-396.73
Etoposide_AML_180min_5_36_95	386.33	-142.82	-261.26
Etoposide_AML_180min_5_36_80	386.33	-142.82	-291.02
Etoposide_AML_90min_6_79_174	386.04	0	-88.21
Etoposide_AML_90min_6_79_235	386.04	-142.82	-149.98
Etoposide_AML_0min_7_64_174	385.99	-142.82	-1
Etoposide_AML_0min_7_64_132	385.99	-142.82	-353.07
Etoposide_AML_90min_8_68_182	385.98	0	-25.63
Etoposide_AML_90min_8_68_136	385.98	0	-339.51
Etoposide_AML_90min_4_59_142	385.25	0	-166.91
Etoposide_AML_90min_4_59_119	385.25	0	-209.71
Etoposide_AML_90min_7_95_292	383.42	0	-1
Etoposide_AML_90min_7_95_194	383.42	0	-1
Etoposide_AML_180min_4_25_50	382.91	0	-139.81
Etoposide_AML_180min_4_25_52	382.91	-142.82	-389.94
Etoposide_AML_0min_4_68_172	381.58	0	-1
Etoposide_AML_0min_4_68_147	381.58	0	-1
Etoposide_AML_180min_5_10_20	380.7	0	-69.56
Etoposide_AML_180min_5_10_23	380.7	-142.82	-117.79
Etoposide_AML_0min_4_86_215	380.25	0	-1
Etoposide_AML_0min_4_86_187	380.25	-142.82	-1
Etoposide_AML_90min_1_87_168	378.8	-142.82	-95.99
Etoposide_AML_90min_1_87_221	378.8	-142.82	-241.28
Etoposide_AML_180min_1_35_81	374.35	-142.82	-52.13
Etoposide_AML_180min_1_35_59	374.35	-142.82	-197.04
Etoposide_AML_180min_1_66_145	374.13	-142.82	-121.47
Etoposide_AML_180min_1_66_108	374.13	-142.82	-268.4
Etoposide_AML_90min_6_9_28	373.58	0	-18.51
Etoposide_AML_90min_6_9_25	373.58	0	-168.16
Etoposide_AML_90min_1_69_176	372.94	-142.82	-107.91
Etoposide_AML_90min_1_69_133	372.94	0	-254.57
Etoposide_AML_180min_1_57_92	370.45	428.46	-1
Etoposide_AML_180min_1_57_127	370.45	428.46	-1
Etoposide_AML_180min_4_19_42	370.18	-142.82	-46.2
Etoposide_AML_180min_4_19_33	370.18	0	-296.55
Etoposide_AML_90min_9_57_175	368.54	-142.82	-220.69
Etoposide_AML_90min_9_57_119	368.54	-142.82	-252.7
Etoposide_AML_90min_4_28_72	368.48	-142.82	-176.84
Etoposide_AML_90min_4_28_56	368.48	-142.82	-367.02
Etoposide_AML_0min_4_50_128	368.01	-142.82	-154.44
Etoposide_AML_0min_4_50_111	368.01	0	-356.87
Etoposide_AML_0min_6_29_84	367.82	-142.82	-1
Etoposide_AML_0min_6_29_61	367.82	0	-1
Etoposide_AML_90min_3_94_224	367.47	0	-1
Etoposide_AML_90min_3_94_203	367.47	142.82	-1
Etoposide_AML_90min_1_48_94	367.15	0	-142.21
Etoposide_AML_90min_1_48_123	367.15	0	-308.46
Etoposide_AML_90min_2_48_123	366.18	-142.82	-253.59
Etoposide_AML_90min_2_48_98	366.18	-142.82	-289.95
Etoposide_AML_180min_2_35_78	365.97	-142.82	-8.87
Etoposide_AML_180min_2_35_87	365.97	-142.82	-63.78
Etoposide_AML_180min_4_41_91	364.21	0	-235.58
Etoposide_AML_180min_4_41_82	364.21	0	-269.31
Etoposide_AML_180min_3_45_70	364.2	0	-1
Etoposide_AML_180min_3_45_116	364.2	0	-378.09
Etoposide_AML_180min_4_55_125	363.91	-142.82	-13.65
Etoposide_AML_180min_4_55_115	363.91	-142.82	-344.87
Etoposide_AML_0min_5_44_112	363.47	-142.82	-197.33
Etoposide_AML_0min_5_44_89	363.47	-142.82	-244.11
Etoposide_AML_90min_7_63_198	363.3	0	-155
Etoposide_AML_90min_7_63_128	363.3	0	-363.68
Etoposide_AML_0min_5_91_217	363.09	0	-1
Etoposide_AML_0min_5_91_185	363.09	0	-1
Etoposide_AML_90min_3_98_210	362.97	0	-78.69
Etoposide_AML_90min_3_98_231	362.97	0	-283.32
Etoposide_AML_90min_8_88_238	362.64	0	-70.33
Etoposide_AML_90min_8_88_181	362.64	0	-238.19
Etoposide_AML_180min_7_81_247	362.51	428.46	259.36
Etoposide_AML_180min_7_81_170	362.51	0	-200.85
Etoposide_AML_0min_7_56_117	362.38	0	-202.16
Etoposide_AML_0min_7_56_155	362.38	0	-236.3
Etoposide_AML_0min_7_20_62	362	0	-241.7
Etoposide_AML_0min_7_20_46	362	-142.82	-328.12
Etoposide_AML_0min_3_71_148	361.88	0	1
Etoposide_AML_0min_3_71_214	361.88	-142.82	-162.19
Etoposide_AML_90min_1_91_177	361.81	-142.82	-319.77
Etoposide_AML_90min_1_91_230	361.81	-142.82	-340.16
Etoposide_AML_90min_1_64_124	361.77	-142.82	-44.52
Etoposide_AML_90min_1_64_163	361.77	-142.82	-305.81
Etoposide_AML_90min_7_63_129	361.63	0	1
Etoposide_AML_90min_7_63_197	361.63	0	-142.09
Etoposide_AML_90min_8_5_13	359.1	0	-15.28
Etoposide_AML_90min_8_5_14	359.1	0	-185.76
Etoposide_AML_0min_1_52_182	358.4	0	-291.66
Etoposide_AML_0min_1_52_118	358.4	0	-293.51
Etoposide_AML_90min_3_87_188	357.42	0	1
Etoposide_AML_90min_3_87_206	357.42	428.46	-1
Etoposide_AML_0min_1_80_181	357.26	-142.82	-4.43
Etoposide_AML_0min_1_80_271	357.26	-142.82	-39.91
Etoposide_AML_90min_4_97_226	357.09	0	-1
Etoposide_AML_90min_4_97_193	357.09	0	-1
Etoposide_AML_90min_5_1_2	353.94	0	1
Etoposide_AML_90min_5_1_5	353.94	0	-250.56
Etoposide_AML_90min_5_15_36	353.33	-142.82	-108.98
Etoposide_AML_90min_5_15_30	353.33	-142.82	-218.52
Etoposide_AML_0min_6_46_101	353.1	-142.82	-33.44
Etoposide_AML_0min_6_46_133	353.1	0	-248.12
Etoposide_AML_180min_1_12_25	352.45	0	-1
Etoposide_AML_180min_1_12_21	352.45	0	-219.1
Etoposide_AML_0min_4_35_76	352.19	-142.82	-1
Etoposide_AML_0min_4_35_90	352.19	-142.82	-166.24
Etoposide_AML_90min_1_79_152	352.13	-428.46	1
Etoposide_AML_90min_1_79_201	352.13	0	-13.34
Etoposide_AML_180min_4_78_159	352.12	-142.82	-1.31
Etoposide_AML_180min_4_78_185	352.12	-142.82	-184.52
Etoposide_AML_90min_7_39_120	349.92	-142.82	-218.63
Etoposide_AML_90min_7_39_81	349.92	-142.82	-369.98
Etoposide_AML_0min_5_74_178	348.55	285.64	437.42
Etoposide_AML_0min_5_74_151	348.55	0	-399.08
Etoposide_AML_0min_5_75_152	348.51	-142.82	-25.96
Etoposide_AML_0min_5_75_180	348.51	0	-224.4
Etoposide_AML_90min_5_77_177	346.87	0	-1
Etoposide_AML_90min_5_77_150	346.87	0	-1
Etoposide_AML_180min_6_52_150	346.85	0	-46.09
Etoposide_AML_180min_6_52_107	346.85	0	-391.79
Etoposide_AML_90min_2_26_55	345.88	-142.82	-75.3
Etoposide_AML_90min_2_26_70	345.88	-142.82	-154.33
Etoposide_AML_90min_4_94_187	345.83	-142.82	-1
Etoposide_AML_90min_4_94_219	345.83	-142.82	-195.87
Etoposide_AML_180min_1_28_48	344.74	-285.64	1
Etoposide_AML_180min_1_28_64	344.74	-428.46	-168.63
Etoposide_AML_90min_4_46_114	344.48	0	-284.32
Etoposide_AML_90min_4_46_93	344.48	0	-336.91
Etoposide_AML_0min_5_30_77	344.31	-142.82	-14.3
Etoposide_AML_0min_5_30_60	344.31	-142.82	-156.72
Etoposide_AML_90min_8_65_130	343.9	-142.82	-0.92
Etoposide_AML_90min_8_65_175	343.9	0	-172.99
Etoposide_AML_180min_7_46_103	343.2	0	-112.31
Etoposide_AML_180min_7_46_159	343.2	-142.82	-163.38
Etoposide_AML_180min_1_56_124	343.11	0	-18.45
Etoposide_AML_180min_1_56_90	343.11	0	-123.9
Etoposide_AML_0min_4_22_45	342.84	-142.82	-1
Etoposide_AML_0min_4_22_56	342.84	0	-251.65
Etoposide_AML_90min_5_11_27	342.68	0	-1
Etoposide_AML_90min_5_11_20	342.68	-142.82	-187.17
Etoposide_AML_90min_5_33_64	342.67	0	-80.45
Etoposide_AML_90min_5_33_75	342.67	0	-155.31
Etoposide_AML_0min_5_78_185	342.64	-142.82	-217.8
Etoposide_AML_0min_5_78_159	342.64	-142.82	-351.41
Etoposide_AML_180min_2_16_33	342.44	0	-3.86
Etoposide_AML_180min_2_16_35	342.44	0	-278.03
Etoposide_AML_0min_2_51_168	342.43	0	-57.66
Etoposide_AML_0min_2_51_99	342.43	-142.82	-182.92
Etoposide_AML_90min_5_32_61	342.2	0	-229.12
Etoposide_AML_90min_5_32_73	342.2	0	-316.74
Etoposide_AML_90min_4_84_169	342.17	428.46	234.79
Etoposide_AML_90min_4_84_200	342.17	428.46	45.31
Etoposide_AML_0min_1_80_180	341.86	0	-16.62
Etoposide_AML_0min_1_80_272	341.86	0	-240.59
Etoposide_AML_180min_6_70_201	341.66	-142.82	-1
Etoposide_AML_180min_6_70_146	341.66	-142.82	-369.5
Etoposide_AML_90min_5_32_62	341.07	0	-75.79
Etoposide_AML_90min_5_32_74	341.07	-142.82	-309.65
Etoposide_AML_90min_4_35_92	340.61	-142.82	-1.41
Etoposide_AML_90min_4_35_73	340.61	-142.82	-132.72
Etoposide_AML_180min_1_1_1	339.74	0	-271.85
Etoposide_AML_180min_1_1_0	339.74	0	-286.31
Etoposide_AML_90min_3_68_166	339.62	-428.46	358.64
Etoposide_AML_90min_3_68_151	339.62	0	-332.53
Etoposide_AML_90min_3_79_189	339.11	0	-1
Etoposide_AML_90min_3_79_172	339.11	0	-1
Etoposide_AML_180min_1_23_40	339.05	0	-21.95
Etoposide_AML_180min_1_23_51	339.05	-142.82	-303.41
Etoposide_AML_180min_5_98_252	338	0	-1
Etoposide_AML_180min_5_98_209	338	0	-1
Etoposide_AML_90min_4_57_138	337.82	-142.82	-62.73
Etoposide_AML_90min_4_57_115	337.82	0	-202.27
Etoposide_AML_0min_3_54_169	337.54	-142.82	-12
Etoposide_AML_0min_3_54_112	337.54	-142.82	-305.31
Etoposide_AML_0min_6_26_77	337.1	0	-77.76
Etoposide_AML_0min_6_26_55	337.1	-142.82	-106.14
Etoposide_AML_0min_6_9_25	336.33	0	-225.88
Etoposide_AML_0min_6_9_21	336.33	0	-276.28
Etoposide_AML_90min_2_66_133	335.46	0	-2.92
Etoposide_AML_90min_2_66_169	335.46	-428.46	-180.15
Etoposide_AML_180min_6_82_231	335.43	-142.82	-241.11
Etoposide_AML_180min_6_82_172	335.43	-142.82	-248.01
Etoposide_AML_90min_3_5_12	335.02	0	-5.37
Etoposide_AML_90min_3_5_10	335.02	0	-277.1
Etoposide_AML_180min_4_86_175	334.28	0	1
Etoposide_AML_180min_4_86_200	334.28	428.46	-1
Etoposide_AML_90min_9_96_285	333.14	-428.46	-119.82
Etoposide_AML_90min_9_96_196	333.14	0	-195.02
Etoposide_AML_90min_4_10_18	332.78	-142.82	-131.64
Etoposide_AML_90min_4_10_26	332.78	0	-196.52
Etoposide_AML_0min_5_75_179	331.38	0	-16.15
Etoposide_AML_0min_5_75_153	331.38	-428.46	-302.67
Etoposide_AML_0min_2_89_173	331.16	-142.82	-75.31
Etoposide_AML_0min_2_89_282	331.16	-142.82	-236.75
Etoposide_AML_180min_5_6_12	330.66	0	-32.3
Etoposide_AML_180min_5_6_14	330.66	0	-192.57
Etoposide_AML_90min_3_20_51	330.19	-285.64	-125.91
Etoposide_AML_90min_3_20_44	330.19	0	-303.26
Etoposide_AML_90min_9_44_135	330.14	-142.82	-77.39
Etoposide_AML_90min_9_44_90	330.14	-142.82	-171.63
Etoposide_AML_90min_1_79_153	329.84	-142.82	-143.2
Etoposide_AML_90min_1_79_202	329.84	-142.82	-265.23
Etoposide_AML_90min_4_23_46	328.07	0	-71.15
Etoposide_AML_90min_4_23_58	328.07	-142.82	-223.54
Etoposide_AML_90min_4_55_111	327.89	0	-156.64
Etoposide_AML_90min_4_55_135	327.89	-428.46	-269.57
Etoposide_AML_180min_3_31_84	327.42	0	-55.38
Etoposide_AML_180min_3_31_52	327.42	0	-224.07
Etoposide_AML_90min_3_70_155	326.61	-142.82	-70.71
Etoposide_AML_90min_3_70_171	326.61	-142.82	-116.51
Etoposide_AML_180min_1_62_99	326.57	0	1
Etoposide_AML_180min_1_62_136	326.57	-142.82	-1
Etoposide_AML_0min_5_81_192	326.36	0	-249.8
Etoposide_AML_0min_5_81_166	326.36	0	-281.96
Etoposide_AML_90min_9_59_178	326.25	0	-1
Etoposide_AML_90min_9_59_123	326.25	0	-1
Etoposide_AML_180min_5_6_13	324.71	0	-29.53
Etoposide_AML_180min_5_6_11	324.71	-142.82	-221.99
Etoposide_AML_0min_5_46_93	324.69	0	55.63
Etoposide_AML_0min_5_46_117	324.69	0	-42.28
Etoposide_AML_90min_4_38_79	324.69	0	-137.59
Etoposide_AML_90min_4_38_99	324.69	0	-181.19
Etoposide_AML_90min_5_70_159	324.64	0	-56.73
Etoposide_AML_90min_5_70_135	324.64	-428.46	-332.09
Etoposide_AML_0min_4_52_116	324.61	-142.82	-1
Etoposide_AML_0min_4_52_133	324.61	-142.82	-120.99
Etoposide_AML_180min_6_63_132	324.5	0	1
Etoposide_AML_180min_6_63_183	324.5	-142.82	-341.64
Etoposide_AML_0min_1_88_197	324.42	0	-4.14
Etoposide_AML_0min_1_88_291	324.42	-142.82	-79.58
Etoposide_AML_90min_7_39_80	324.19	-142.82	-5.33
Etoposide_AML_90min_7_39_121	324.19	-142.82	-103.8
Etoposide_AML_0min_5_89_212	323.34	0	-301.85
Etoposide_AML_0min_5_89_180	323.34	-142.82	-352.33
Etoposide_AML_180min_2_47_113	323.34	-142.82	-359.28
Etoposide_AML_180min_2_47_99	323.34	0	-367.05
Etoposide_AML_180min_6_31_67	322.98	-142.82	-10.99
Etoposide_AML_180min_6_31_92	322.98	0	-229.07
Etoposide_AML_0min_7_77_158	322.56	0	-176.04
Etoposide_AML_0min_7_77_206	322.56	-142.82	-312.77
Etoposide_AML_90min_4_78_188	321.72	-428.46	-1
Etoposide_AML_90min_4_78_158	321.72	-428.46	-262.8
Etoposide_AML_180min_3_31_85	321.21	-142.82	-35.03
Etoposide_AML_180min_3_31_51	321.21	-142.82	-309.2
Etoposide_AML_90min_3_79_173	321.07	0	-18.98
Etoposide_AML_90min_3_79_190	321.07	0	-223.95
Etoposide_AML_90min_1_25_48	320.39	-142.82	-10.4
Etoposide_AML_90min_1_25_59	320.39	-142.82	-27.57
Etoposide_AML_90min_1_84_161	319.38	-142.82	-252.09
Etoposide_AML_90min_1_84_213	319.38	0	-324.62
Etoposide_AML_0min_3_37_75	318.99	0	-57.2
Etoposide_AML_0min_3_37_120	318.99	-285.64	-390.05
Etoposide_AML_90min_3_43_98	318.86	0	-104.95
Etoposide_AML_90min_3_43_109	318.86	0	-199.78
Etoposide_AML_0min_7_90_236	318.56	-142.82	-116.47
Etoposide_AML_0min_7_90_188	318.56	-142.82	-202.06
Etoposide_AML_0min_7_75_200	318.43	-142.82	-1
Etoposide_AML_0min_7_75_153	318.43	-142.82	-1
Etoposide_AML_0min_2_14_26	318.23	-142.82	-1
Etoposide_AML_90min_3_3_9	318.23	0	-67.31
Etoposide_AML_90min_3_3_8	318.23	0	-229.13
Etoposide_AML_0min_2_14_53	318.23	-142.82	-320.03
Etoposide_AML_0min_4_72_182	318.05	-142.82	-133.93
Etoposide_AML_0min_4_72_159	318.05	-142.82	-322.15
Etoposide_AML_180min_2_21_47	317.81	-142.82	-4.73
Etoposide_AML_180min_2_21_44	317.81	-142.82	-71.03
Etoposide_AML_90min_4_94_188	317.38	0	-48.52
Etoposide_AML_90min_4_94_220	317.38	0	-243.44
Etoposide_AML_180min_5_81_211	317.04	-142.82	-1
Etoposide_AML_180min_5_81_172	317.04	-142.82	-158.76
Etoposide_AML_0min_5_83_197	317.03	-142.82	-262.4
Etoposide_AML_0min_5_83_169	317.03	-142.82	-306.72
Etoposide_AML_90min_4_8_21	316.13	-142.82	-116.2
Etoposide_AML_90min_4_8_14	316.13	-142.82	-338.61
Etoposide_AML_0min_2_28_91	315.97	-428.46	1
Etoposide_AML_0min_2_28_52	315.97	0	-1
Etoposide_AML_180min_2_66_157	315.82	0	-46.87
Etoposide_AML_180min_2_66_129	315.82	0	-268.79
Etoposide_AML_90min_8_61_165	315.81	-142.82	-227.94
Etoposide_AML_90min_8_61_122	315.81	-142.82	-323.27
Etoposide_AML_180min_4_54_122	315.23	-142.82	-226.68
Etoposide_AML_180min_4_54_112	315.23	-142.82	-319.87
Etoposide_AML_90min_5_58_133	315.17	-142.82	-176.34
Etoposide_AML_90min_5_58_113	315.17	0	-299.13
Etoposide_AML_90min_5_61_119	315.16	-142.82	-81.12
Etoposide_AML_90min_5_61_142	315.16	-142.82	-92.8
Etoposide_AML_90min_3_46_114	314.43	0	-325.41
Etoposide_AML_90min_3_46_104	314.43	-142.82	-347.45
Etoposide_AML_0min_3_81_168	314.3	-142.82	-222.71
Etoposide_AML_0min_3_81_238	314.3	-142.82	-282.88
Etoposide_AML_90min_4_64_153	314.17	-142.82	-30.17
Etoposide_AML_90min_4_64_130	314.17	0	-183.95
Etoposide_AML_90min_3_21_52	314	-142.82	-280.25
Etoposide_AML_90min_3_21_45	314	-142.82	-360.07
Etoposide_AML_180min_6_9_19	313.96	-142.82	-215.17
Etoposide_AML_180min_6_9_28	313.96	-142.82	-304.72
Etoposide_AML_90min_2_47_122	313.24	0	-4.33
Etoposide_AML_90min_2_47_96	313.24	0	-280.47
Etoposide_AML_90min_3_59_148	313.11	0	-100.62
Etoposide_AML_90min_3_59_133	313.11	0	-231.34
Etoposide_AML_90min_3_45_113	312.57	0	-235.78
Etoposide_AML_90min_3_45_101	312.57	0	-331.48
Etoposide_AML_90min_4_49_98	312.47	-142.82	-4.79
Etoposide_AML_90min_4_49_120	312.47	-142.82	-69.08
Etoposide_AML_90min_5_33_63	311.63	-142.82	-146.4
Etoposide_AML_90min_5_33_76	311.63	-142.82	-276.24
Etoposide_AML_90min_5_2_4	311.3	-142.82	-98.71
Etoposide_AML_90min_5_2_7	311.3	-142.82	-314.71
Etoposide_AML_180min_4_40_80	310.34	0	1
Etoposide_AML_180min_4_40_89	310.34	0	-279.78
Etoposide_AML_180min_2_4_8	310.32	-142.82	-1
Etoposide_AML_180min_2_4_8	310.32	-142.82	-369.48
Etoposide_AML_0min_6_51_147	310.24	-142.82	-1
Etoposide_AML_0min_6_51_110	310.24	-142.82	-1
Etoposide_AML_180min_3_52_130	310.18	0	-94.42
Etoposide_AML_180min_3_52_81	310.18	0	-124.45
Etoposide_AML_90min_3_98_232	310	-428.46	-227.31
Etoposide_AML_90min_3_98_209	310	-428.46	-258.01
Etoposide_AML_180min_5_46_123	309.86	-142.82	-334.08
Etoposide_AML_180min_5_46_102	309.86	-142.82	-362.49
Etoposide_AML_90min_8_56_155	309.79	-142.82	-16
Etoposide_AML_90min_8_56_115	309.79	-142.82	-242.44
Etoposide_AML_0min_4_41_105	308.78	-142.82	-381.4
Etoposide_AML_0min_4_41_91	308.78	-142.82	-385.71
Etoposide_AML_90min_8_68_183	308.52	-142.82	-19.79
Etoposide_AML_90min_8_68_135	308.52	-142.82	-92.41
Etoposide_AML_180min_4_54_113	308.15	-142.82	-111.28
Etoposide_AML_180min_4_54_123	308.15	0	-148.53
Etoposide_AML_0min_5_94_189	307.65	0	-63.3
Etoposide_AML_0min_5_94_221	307.65	0	-156.45
Etoposide_AML_180min_3_54_85	307.37	-142.82	-69.7
Etoposide_AML_180min_3_54_135	307.37	-142.82	-214.27
Etoposide_AML_180min_7_81_246	306.79	0	-1
Etoposide_AML_180min_7_81_169	306.79	0	-1
Etoposide_AML_90min_7_90_183	306.61	-142.82	-198.65
Etoposide_AML_90min_7_90_279	306.61	-142.82	-333.41
Etoposide_AML_0min_3_43_89	306.55	-142.82	-143.59
Etoposide_AML_0min_3_43_137	306.55	0	-147.79
Etoposide_AML_0min_5_14_33	305.83	0	-1
Etoposide_AML_0min_5_14_25	305.83	0	-1
Etoposide_AML_180min_4_80_188	305.79	0	-1
Etoposide_AML_180min_4_80_164	305.79	0	-1
Etoposide_AML_0min_6_32_91	305.4	-142.82	-232.45
Etoposide_AML_0min_6_32_68	305.4	-142.82	-267.65
Etoposide_AML_90min_2_88_175	304.42	0	-56.29
Etoposide_AML_90min_2_88_222	304.42	-428.46	-119.51
Etoposide_AML_180min_7_62_195	304.09	-142.82	-1
Etoposide_AML_180min_7_62_132	304.09	-142.82	-1
Etoposide_AML_180min_2_76_146	303.72	-142.82	-25.57
Etoposide_AML_180min_2_76_176	303.72	-142.82	-308.88
Etoposide_AML_0min_3_92_268	303.07	-142.82	-105.89
Etoposide_AML_0min_3_92_190	303.07	0	-300.66
Etoposide_AML_0min_5_57_143	303.06	0	-1
Etoposide_AML_0min_5_57_116	303.06	0	-1
Etoposide_AML_90min_1_93_181	302.33	0	-93.23
Etoposide_AML_90min_1_93_235	302.33	0	-272.95
Etoposide_AML_180min_4_2_2	302.03	0	-132.56
Etoposide_AML_180min_4_2_3	302.03	-142.82	-244.25
Etoposide_AML_0min_2_16_30	301.7	0	-95.01
Etoposide_AML_0min_2_16_58	301.7	0	-308.48
Etoposide_AML_180min_2_74_143	301.45	-142.82	0
Etoposide_AML_180min_2_74_173	301.45	0	-157.32
Etoposide_AML_90min_9_57_174	301.23	-142.82	-22.32
Etoposide_AML_90min_9_57_120	301.23	-142.82	-197.62
Etoposide_AML_90min_4_84_170	300.85	0	-93.63
Etoposide_AML_90min_4_84_201	300.85	-142.82	-141.56
Etoposide_AML_90min_3_34_80	300.81	0	-107.83
Etoposide_AML_90min_3_34_90	300.81	0	-194.34
Etoposide_AML_0min_3_47_148	300.5	0	-1
Etoposide_AML_0min_3_47_96	300.5	-142.82	-1
Etoposide_AML_90min_9_37_73	300.02	-142.82	-335.14
Etoposide_AML_90min_9_37_114	300.02	0	-348.39
Etoposide_AML_0min_6_79_164	299.23	0	1
Etoposide_AML_0min_6_79_199	299.23	-428.46	-152.82
Etoposide_AML_180min_2_76_177	298.85	-142.82	-304.23
Etoposide_AML_180min_2_76_147	298.85	-142.82	-395.96
Etoposide_AML_90min_3_68_150	298.62	-142.82	-159
Etoposide_AML_90min_3_68_165	298.62	-142.82	-300.98
Etoposide_AML_180min_5_98_251	298.44	0	-105.56
Etoposide_AML_180min_5_98_208	298.44	-142.82	-152.23
Etoposide_AML_0min_7_19_60	298.3	0	-191.21
Etoposide_AML_0min_7_19_45	298.3	0	-332.6
Etoposide_AML_180min_5_96_247	298.11	0	-234.42
Etoposide_AML_180min_5_96_204	298.11	0	-262.77
Etoposide_AML_0min_3_81_167	297.72	0	-109.16
Etoposide_AML_0min_3_81_239	297.72	0	-173.81
Etoposide_AML_90min_2_73_147	297.52	0	-8.92
Etoposide_AML_90min_2_73_186	297.52	0	-259.57
Etoposide_AML_90min_3_72_174	297.35	0	-1
Etoposide_AML_90min_3_72_158	297.35	0	-1
Etoposide_AML_90min_2_4_10	297.3	-142.82	181.55
Etoposide_AML_90min_2_4_13	297.3	-142.82	-105.17
Etoposide_AML_0min_7_27_77	297.03	-142.82	-1
Etoposide_AML_0min_7_27_61	297.03	-142.82	-1
Etoposide_AML_180min_3_55_138	296.5	-285.64	1
Etoposide_AML_180min_3_55_86	296.5	-428.46	-223.63
Etoposide_AML_90min_3_66_146	296.06	-142.82	-177.02
Etoposide_AML_90min_3_66_161	296.06	0	-311.82
Etoposide_AML_90min_4_67_136	295.27	0	-70.8
Etoposide_AML_90min_4_67_160	295.27	0	-325.13
Etoposide_AML_0min_6_68_182	295.15	0	1
Etoposide_AML_0min_6_68_142	295.15	-428.46	-1.05
Etoposide_AML_0min_6_26_56	294.79	0	-33.18
Etoposide_AML_0min_6_26_76	294.79	0	-247.45
Etoposide_AML_0min_7_22_66	294.07	-142.82	-1
Etoposide_AML_0min_7_22_51	294.07	-142.82	-1
Etoposide_AML_0min_6_18_51	293.97	-142.82	-4.6
Etoposide_AML_0min_6_18_39	293.97	-142.82	-49.17
Etoposide_AML_0min_4_47_121	293.46	-142.82	-1
Etoposide_AML_0min_4_47_104	293.46	-142.82	-1
Etoposide_AML_180min_5_70_151	293.24	-285.64	1
Etoposide_AML_180min_5_70_181	293.24	0	-324.36
Etoposide_AML_90min_5_77_176	293.1	-142.82	-1
Etoposide_AML_90min_5_77_149	293.1	-142.82	-1
Etoposide_AML_90min_1_51_129	293.07	285.64	-1
Etoposide_AML_90min_1_51_100	293.07	-142.82	-1
Etoposide_AML_180min_4_8_14	292.22	0	-17.59
Etoposide_AML_180min_4_8_11	292.22	-142.82	-32.28
Etoposide_AML_0min_6_4_14	291.68	-142.82	-1
Etoposide_AML_0min_6_4_11	291.68	-142.82	-169.95
Etoposide_AML_180min_1_7_15	291.38	-142.82	-126.15
Etoposide_AML_180min_1_7_14	291.38	-142.82	-156.73
Etoposide_AML_90min_8_98_199	290.91	0	-109.04
Etoposide_AML_90min_8_98_265	290.91	0	-312.37
Etoposide_AML_90min_2_31_65	290.71	0	-273.8
Etoposide_AML_90min_2_31_83	290.71	-142.82	-292.9
Etoposide_AML_0min_6_64_173	290.41	-142.82	-1
Etoposide_AML_0min_6_64_134	290.41	-142.82	-1
Etoposide_AML_0min_7_61_126	289.92	0	-1
Etoposide_AML_0min_7_61_168	289.92	0	-344.76
Etoposide_AML_90min_5_13_26	289.55	-142.82	-14.29
Etoposide_AML_90min_5_13_32	289.55	-142.82	-177.61
Etoposide_AML_90min_5_15_35	289.3	0	-1
Etoposide_AML_90min_5_15_29	289.3	0	-1
Etoposide_AML_90min_9_97_286	289.11	0	-1
Etoposide_AML_90min_9_97_198	289.11	0	-1
Etoposide_AML_0min_6_59_165	288.66	0	-7.22
Etoposide_AML_0min_6_59_125	288.66	-142.82	-205.14
Etoposide_AML_0min_3_43_138	288.62	-142.82	-51.96
Etoposide_AML_0min_3_43_88	288.62	-142.82	-142.69
Etoposide_AML_90min_9_63_190	288.48	0	-43.46
Etoposide_AML_90min_9_63_131	288.48	0	-327.62
Etoposide_AML_180min_7_14_46	287.99	0	-1
Etoposide_AML_180min_7_14_34	287.99	0	-1
Etoposide_AML_180min_2_83_158	287.78	0	-1
Etoposide_AML_180min_2_83_191	287.78	0	-1
Etoposide_AML_90min_3_33_87	287.49	0	-1
Etoposide_AML_90min_3_33_79	287.49	0	-1
Etoposide_AML_90min_1_11_22	287.3	0	-207.74
Etoposide_AML_90min_1_11_24	287.3	0	-239.71
Etoposide_AML_180min_2_2_3	287.26	-142.82	-94.48
Etoposide_AML_180min_2_2_4	287.26	-142.82	-363.53
Etoposide_AML_90min_8_80_216	287.07	0	-111.49
Etoposide_AML_90min_8_80_161	287.07	0	-348.58
Etoposide_AML_90min_8_91_188	286.99	-142.82	-92.68
Etoposide_AML_90min_8_91_245	286.99	-142.82	-342.6
Etoposide_AML_90min_3_54_136	286.77	0	-122.13
Etoposide_AML_90min_3_54_123	286.77	0	-366.37
Etoposide_AML_90min_5_38_72	286.39	0	-248.12
Etoposide_AML_90min_5_38_86	286.39	0	-287.24
Etoposide_AML_90min_2_49_125	286.38	-142.82	-1
Etoposide_AML_90min_2_49_100	286.38	-142.82	-1
Etoposide_AML_0min_2_16_59	285.9	0	-49.46
Etoposide_AML_0min_2_16_31	285.9	-142.82	-95.77
Etoposide_AML_90min_3_76_167	285.82	0	-96.61
Etoposide_AML_90min_3_76_183	285.82	0	-341.78
Etoposide_AML_90min_4_93_217	285.41	0	-133.38
Etoposide_AML_90min_4_93_185	285.41	0	-302.64
Etoposide_AML_0min_3_71_213	285.25	0	1
Etoposide_AML_0min_3_71_147	285.25	0	-221.72
Etoposide_AML_180min_1_71_116	285.07	0	1
Etoposide_AML_180min_1_71_153	285.07	-285.64	-300.62
Etoposide_AML_0min_2_14_52	284.61	0	-1.59
Etoposide_AML_0min_2_14_27	284.61	0	-205.08
Etoposide_AML_90min_3_67_148	284.4	0	-24.14
Etoposide_AML_90min_3_67_163	284.4	0	-96.12
Etoposide_AML_90min_5_73_142	283.49	0	-1
Etoposide_AML_90min_5_73_166	283.49	-142.82	-69.53
Etoposide_AML_180min_1_6_11	283.44	0	-297.89
Etoposide_AML_180min_1_6_13	283.44	-142.82	-334.9
Etoposide_AML_0min_6_66_177	283.21	-142.82	-1
Etoposide_AML_0min_6_66_139	283.21	-142.82	-172.11
Etoposide_AML_90min_6_97_211	282.84	0	-357.21
Etoposide_AML_90min_6_97_287	282.84	-142.82	-378.04
Etoposide_AML_180min_2_35_77	282.81	0	1
Etoposide_AML_180min_2_35_86	282.81	0	1
Etoposide_AML_90min_1_50_126	282.29	0	-5.01
Etoposide_AML_90min_1_50_98	282.29	-142.82	-198.45
Etoposide_AML_90min_5_62_144	282.25	-142.82	-1
Etoposide_AML_90min_5_62_121	282.25	-142.82	-1
Etoposide_AML_0min_5_11_27	281.94	0	-159.71
Etoposide_AML_0min_5_11_20	281.94	0	-372.95
Etoposide_AML_0min_7_88_233	281.45	0	-128.15
Etoposide_AML_0min_7_88_183	281.45	0	-321.58
Etoposide_AML_180min_1_71_154	281.4	0	-1
Etoposide_AML_180min_1_71_115	281.4	0	-204.46
Etoposide_AML_90min_3_44_111	281.35	0	-1
Etoposide_AML_90min_3_44_99	281.35	0	-1
Etoposide_AML_90min_8_56_114	281.18	-142.82	-45.31
Etoposide_AML_90min_8_56_154	281.18	0	-196.27
Etoposide_AML_90min_5_75_172	281.12	0	-255.57
Etoposide_AML_90min_5_75_145	281.12	0	-286.51
Etoposide_AML_90min_1_32_63	280.69	-142.82	-217.35
Etoposide_AML_90min_1_32_77	280.69	-142.82	-333.58
Etoposide_AML_180min_3_5_8	280.2	0	-251.66
Etoposide_AML_180min_3_5_15	280.2	0	-354.07
Etoposide_AML_90min_5_96_217	280.08	0	-1
Etoposide_AML_90min_5_96_184	280.08	0	-1
Etoposide_AML_180min_4_8_15	279.86	0	-112.01
Etoposide_AML_180min_4_8_12	279.86	0	-145.34
Etoposide_AML_0min_7_19_59	279.58	428.46	323.71
Etoposide_AML_0min_7_19_44	279.58	-428.46	-191.63
Etoposide_AML_180min_5_90_232	279.25	-142.82	-266.33
Etoposide_AML_180min_5_90_192	279.25	-142.82	-343.21
Etoposide_AML_90min_1_6_14	278.29	0	-1
Etoposide_AML_90min_1_6_13	278.29	0	-1
Etoposide_AML_180min_5_24_53	278.15	0	-65.42
Etoposide_AML_180min_5_24_61	278.15	-142.82	-142.09
Etoposide_AML_90min_3_77_169	278.07	0	-147.96
Etoposide_AML_90min_3_77_186	278.07	0	-215.88
Etoposide_AML_180min_5_3_7	277.91	-142.82	-15.89
Etoposide_AML_180min_5_3_8	277.91	-142.82	-204.38
Etoposide_AML_90min_9_37_74	277.88	0	-82.84
Etoposide_AML_90min_9_37_113	277.88	-142.82	-155.16
Etoposide_AML_90min_3_24_50	277.63	0	1
Etoposide_AML_90min_3_24_59	277.63	-142.82	-9.85
Etoposide_AML_180min_5_51_137	277.3	0	-18.41
Etoposide_AML_180min_5_51_110	277.3	0	-76.31
Etoposide_AML_90min_1_70_136	277.22	-142.82	-1.09
Etoposide_AML_90min_1_70_179	277.22	-142.82	-238.59
Etoposide_AML_90min_3_64_158	276.93	-142.82	-166.94
Etoposide_AML_90min_3_64_143	276.93	0	-264.64
Etoposide_AML_0min_2_75_237	276.73	0	-1
Etoposide_AML_0min_2_75_148	276.73	285.64	-1
Etoposide_AML_90min_9_58_121	276.39	0	-27.98
Etoposide_AML_90min_9_58_176	276.39	-142.82	-195.84
Etoposide_AML_0min_5_76_182	276.19	-142.82	-1
Etoposide_AML_0min_5_76_155	276.19	-142.82	-1
Etoposide_AML_0min_5_31_62	276.14	-142.82	-365.22
Etoposide_AML_0min_5_31_78	276.14	-142.82	-385.2
Etoposide_AML_90min_5_14_28	276.06	-142.82	-146.73
Etoposide_AML_90min_5_14_33	276.06	-142.82	-293.36
Etoposide_AML_180min_1_69_149	275.92	0	-248.72
Etoposide_AML_180min_1_69_112	275.92	0	-273.32
Etoposide_AML_0min_1_82_182	275.88	0	-68.28
Etoposide_AML_0min_1_82_275	275.88	-142.82	-185.92
Etoposide_AML_90min_3_67_149	275.11	0	-115.28
Etoposide_AML_90min_3_67_164	275.11	0	-350.17
Etoposide_AML_0min_4_55_142	274.93	-142.82	-1
Etoposide_AML_0min_4_55_122	274.93	-142.82	-1
Etoposide_AML_180min_7_78_237	274.34	0	-204.49
Etoposide_AML_180min_7_78_164	274.34	0	-383.05
Etoposide_AML_0min_6_80_200	273.8	-142.82	-75.44
Etoposide_AML_0min_6_80_167	273.8	-142.82	-296.31
Etoposide_AML_90min_1_96_241	273.3	0	-207.71
Etoposide_AML_90min_1_96_186	273.3	0	-255.88
Etoposide_AML_180min_6_45_129	273.11	-142.82	-1
Etoposide_AML_180min_6_45_92	273.11	-142.82	-1
Etoposide_AML_90min_3_61_152	272.31	-142.82	-1
Etoposide_AML_90min_3_61_137	272.31	-142.82	-1
Etoposide_AML_180min_5_58_129	272.28	-142.82	-40.58
Etoposide_AML_180min_5_58_153	272.28	0	-135.72
Etoposide_AML_90min_3_34_89	270.91	-142.82	-1
Etoposide_AML_90min_3_34_81	270.91	-142.82	-1
Etoposide_AML_0min_5_90_215	270.88	-142.82	-1
Etoposide_AML_0min_5_90_183	270.88	-142.82	-1
Etoposide_AML_90min_1_6_13	270.37	0	-222.15
Etoposide_AML_90min_1_6_12	270.37	0	-316.42
Etoposide_AML_180min_4_43_86	270.11	0	-83.41
Etoposide_AML_180min_4_43_95	270.11	0	-250.6
Etoposide_AML_0min_5_50_126	269.65	0	-111.97
Etoposide_AML_0min_5_50_102	269.65	-142.82	-122.25
Etoposide_AML_90min_5_31_59	269.56	-142.82	-11.78
Etoposide_AML_90min_5_31_71	269.56	-142.82	-153.01
Etoposide_AML_180min_2_52_106	268.81	-142.82	-350.21
Etoposide_AML_180min_2_52_125	268.81	-142.82	-387.48
Etoposide_AML_0min_3_89_259	268.46	-142.82	-271.28
Etoposide_AML_0min_3_89_186	268.46	-142.82	-308.48
Etoposide_AML_90min_5_64_147	268.27	0	-19.97
Etoposide_AML_90min_5_64_125	268.27	0	-46.43
Etoposide_AML_90min_7_43_89	268.2	0	0
Etoposide_AML_90min_7_43_133	268.2	0	-138.56
Etoposide_AML_90min_1_37_93	267.11	-142.82	-1
Etoposide_AML_90min_1_37_74	267.11	-142.82	-1
Etoposide_AML_0min_5_49_101	266.87	0	1
Etoposide_AML_0min_5_49_124	266.87	0	-237.85
Etoposide_AML_90min_2_88_174	266.46	-142.82	-1
Etoposide_AML_90min_2_88_221	266.46	-142.82	-76.08
Etoposide_AML_0min_4_71_157	266.09	-142.82	-116.65
Etoposide_AML_0min_4_71_180	266.09	-142.82	-375.69
Etoposide_AML_90min_6_97_212	265.93	0	-222.89
Etoposide_AML_90min_6_97_288	265.93	0	-261.17
Etoposide_AML_0min_4_68_173	264.9	0	-194.42
Etoposide_AML_0min_4_68_148	264.9	0	-395.58
Etoposide_AML_0min_1_87_290	264.83	0	-253.36
Etoposide_AML_0min_1_87_195	264.83	0	-267.39
Etoposide_AML_180min_2_85_162	264.79	-142.82	-1
Etoposide_AML_180min_2_85_196	264.79	-142.82	-1
Etoposide_AML_0min_6_29_62	264.79	0	-175.57
Etoposide_AML_0min_6_29_83	264.79	0	-315.91
Etoposide_AML_180min_7_44_152	264.75	-142.82	-65.52
Etoposide_AML_180min_7_44_99	264.75	-142.82	-81.02
Etoposide_AML_90min_1_53_103	264.75	0	-182.01
Etoposide_AML_90min_1_53_134	264.75	0	-293.6
Etoposide_AML_0min_5_81_193	264.34	-142.82	-29.79
Etoposide_AML_0min_5_81_167	264.34	-142.82	-360.91
Etoposide_AML_0min_7_57_118	264.08	0	-256.22
Etoposide_AML_0min_7_57_157	264.08	0	-347.45
Etoposide_AML_90min_2_46_120	263.86	-142.82	-1
Etoposide_AML_90min_2_46_94	263.86	-142.82	-134.28
Etoposide_AML_90min_4_68_162	263.59	0	-29.21
Etoposide_AML_90min_4_68_138	263.59	0	-83.23
Etoposide_AML_90min_3_36_94	263.41	0	-102.63
Etoposide_AML_90min_3_36_84	263.41	0	-284.85
Etoposide_AML_180min_1_42_70	263.37	-142.82	-1
Etoposide_AML_180min_1_42_93	263.37	-142.82	-1
Etoposide_AML_0min_5_69_167	262.64	0	-1
Etoposide_AML_0min_5_69_140	262.64	0	-1
Etoposide_AML_180min_5_24_60	262.43	0	-170.6
Etoposide_AML_180min_5_24_54	262.43	0	-222.69
Etoposide_AML_0min_6_68_143	262.37	-142.82	-141.77
Etoposide_AML_0min_6_68_181	262.37	-142.82	-350.26
Etoposide_AML_180min_7_44_100	262.17	-428.46	-127.48
Etoposide_AML_180min_7_44_153	262.17	-428.46	-376.65
Etoposide_AML_90min_4_38_98	262.16	-142.82	-39.6
Etoposide_AML_90min_4_38_78	262.16	0	-155.09
Etoposide_AML_180min_4_79_161	261.65	0	-389.48
Etoposide_AML_180min_4_79_187	261.65	0	-389.56
Etoposide_AML_90min_1_76_194	261.42	0	-1
Etoposide_AML_90min_1_76_148	261.42	0	-1
Etoposide_AML_90min_4_18_48	261.16	0	-1
Etoposide_AML_90min_4_18_37	261.16	0	-1
Etoposide_AML_180min_2_40_88	260.94	-142.82	-159.92
Etoposide_AML_180min_2_40_96	260.94	-142.82	-403.3
Etoposide_AML_180min_4_25_51	260.79	-142.82	-227.34
Etoposide_AML_180min_4_25_49	260.79	-142.82	-366.88
Etoposide_AML_0min_7_48_100	260.39	0	-51.38
Etoposide_AML_0min_7_48_135	260.39	0	-252.26
Etoposide_AML_90min_5_17_32	260.37	-142.82	-22.79
Etoposide_AML_90min_5_17_39	260.37	-142.82	-146.07
Etoposide_AML_90min_3_85_203	260.11	0	1
Etoposide_AML_90min_3_85_185	260.11	0	-340.29
Etoposide_AML_0min_5_14_34	259.74	-142.82	-1
Etoposide_AML_0min_5_14_26	259.74	-142.82	-1
Etoposide_AML_180min_3_30_49	259.46	-142.82	-266.11
Etoposide_AML_180min_3_30_82	259.46	-142.82	-372.5
Etoposide_AML_180min_3_30_50	259.44	0	433.98
Etoposide_AML_180min_3_30_83	259.44	285.64	143.46
Etoposide_AML_180min_4_33_65	259.05	-142.82	-273.18
Etoposide_AML_180min_4_33_71	259.05	-142.82	-351.37
Etoposide_AML_90min_4_32_67	258.39	-142.82	-243.61
Etoposide_AML_90min_4_32_85	258.39	-142.82	-367.18
Etoposide_AML_90min_3_14_37	257.98	-142.82	-236.18
Etoposide_AML_90min_3_14_32	257.98	-142.82	-280.79
Etoposide_AML_90min_5_18_41	257.56	-142.82	-175.59
Etoposide_AML_90min_5_18_34	257.56	-142.82	-310.13
Etoposide_AML_90min_5_11_26	256.31	0	-25.68
Etoposide_AML_90min_5_11_21	256.31	-142.82	-205.94
Etoposide_AML_90min_6_14_34	256.07	-142.82	-183.58
Etoposide_AML_90min_6_14_39	256.07	-142.82	-373.69
Etoposide_AML_180min_6_75_213	255.75	0	-332.7
Etoposide_AML_180min_6_75_156	255.75	0	-389.85
Etoposide_AML_90min_2_77_154	254.34	-142.82	-88.84
Etoposide_AML_90min_2_77_195	254.34	-142.82	-329.05
Etoposide_AML_90min_4_82_196	254.29	-142.82	-1
Etoposide_AML_90min_4_82_166	254.29	0	-1
Etoposide_AML_180min_6_70_145	254.19	0	-285.09
Etoposide_AML_180min_6_70_202	254.19	0	-295.04
Etoposide_AML_0min_4_22_55	253.79	0	1
Etoposide_AML_0min_4_22_44	253.79	0	-135.95
Etoposide_AML_0min_6_6_18	253.46	-428.46	1
Etoposide_AML_0min_6_6_14	253.46	0	-196.89
Etoposide_AML_0min_4_67_170	253.22	0	-1
Etoposide_AML_0min_4_67_145	253.22	0	-88.19
Etoposide_AML_90min_6_29_64	253.07	0	-109.65
Etoposide_AML_90min_6_29_80	253.07	0	-241.43
Etoposide_AML_90min_3_86_204	252.5	0	-173.9
Etoposide_AML_90min_3_86_186	252.5	0	-329.47
Etoposide_AML_90min_6_62_182	252.26	-142.82	-291.24
Etoposide_AML_90min_6_62_135	252.26	-142.82	-374.66
Etoposide_AML_90min_4_90_211	252.19	0	-162.69
Etoposide_AML_90min_4_90_179	252.19	0	-190.36
Etoposide_AML_90min_4_57_116	252.1	0	-30.19
Etoposide_AML_90min_4_57_139	252.1	0	-306.82
Etoposide_AML_180min_1_61_134	251.9	0	-94.96
Etoposide_AML_180min_1_61_98	251.9	0	-169.5
Etoposide_AML_90min_5_61_141	251.8	-142.82	-81.56
Etoposide_AML_90min_5_61_118	251.8	-142.82	-208.16
Etoposide_AML_180min_2_3_6	251.53	0	-1
Etoposide_AML_180min_2_3_7	251.53	0	-1
Etoposide_AML_90min_3_91_196	251.48	-142.82	-1
Etoposide_AML_90min_3_91_217	251.48	-142.82	-203.03
Etoposide_AML_0min_5_31_63	251.31	0	-105.56
Etoposide_AML_0min_5_31_79	251.31	0	-209.93
Etoposide_AML_0min_4_59_152	251.26	-142.82	-340.42
Etoposide_AML_0min_4_59_130	251.26	-142.82	-358.66
Etoposide_AML_0min_5_20_183	250.95	-142.82	-1
Etoposide_AML_0min_5_20_156	250.95	-142.82	-1
Etoposide_AML_0min_5_77_156	250.95	-142.82	-50.13
Etoposide_AML_0min_5_77_183	250.95	-142.82	-78.55
Etoposide_AML_90min_5_65_150	250.71	0	-1
Etoposide_AML_90min_5_65_127	250.71	0	-1
Etoposide_AML_180min_4_91_213	250.68	-142.82	-46.56
Etoposide_AML_180min_4_91_185	250.68	-142.82	-290.63
Etoposide_AML_0min_4_34_75	250.62	0	-47.29
Etoposide_AML_0min_4_34_89	250.62	0	-299.2
Etoposide_AML_90min_9_40_123	250.5	0	-24.34
Etoposide_AML_90min_9_40_80	250.5	0	-27.22
Etoposide_AML_90min_2_66_134	250.36	0	-9.92
Etoposide_AML_90min_2_66_170	250.36	-142.82	-175.61
Etoposide_AML_180min_4_60_125	250.03	0	-49.23
Etoposide_AML_180min_4_60_134	250.03	0	-229.41
Etoposide_AML_180min_4_91_214	249.2	-428.46	1
Etoposide_AML_180min_4_91_186	249.2	0	-256.55
Etoposide_AML_180min_2_7_14	248.62	0	-5.14
Etoposide_AML_180min_2_7_12	248.62	0	-160.72
Etoposide_AML_90min_2_26_69	248.41	0	-146
Etoposide_AML_90min_2_26_56	248.41	0	-220.34
Etoposide_AML_180min_2_53_127	248.3	-285.64	419.17
Etoposide_AML_180min_2_53_108	248.3	0	-275.25
Etoposide_AML_180min_2_19_39	247.7	0	-0.39
Etoposide_AML_180min_2_19_44	247.7	-142.82	-115.19
Etoposide_AML_0min_4_60_154	247.5	0	-122.22
Etoposide_AML_0min_4_60_133	247.5	-142.82	-172.83
Etoposide_AML_0min_6_45_131	247.34	-142.82	-54.24
Etoposide_AML_0min_6_45_98	247.34	0	-156.32
Etoposide_AML_90min_8_55_113	247.17	-142.82	-320.67
Etoposide_AML_90min_8_55_153	247.17	-142.82	-324.24
Etoposide_AML_0min_1_28_71	247.04	0	-1.59
Etoposide_AML_0min_1_28_103	247.04	0	-139.99
Etoposide_AML_180min_2_59_117	247	0	-93.52
Etoposide_AML_180min_2_59_141	247	0	-313.31
Etoposide_AML_0min_3_90_188	246.84	0	-45.05
Etoposide_AML_0min_3_90_262	246.84	0	-239.39
Etoposide_AML_180min_3_62_155	246.22	0	-75.88
Etoposide_AML_180min_3_62_94	246.22	-142.82	-106.68
Etoposide_AML_90min_3_46_115	245.95	-428.46	-247.62
Etoposide_AML_90min_3_46_103	245.95	0	-339.6
Etoposide_AML_90min_1_96_187	245.55	-142.82	-269.2
Etoposide_AML_90min_1_96_242	245.55	-142.82	-333.78
Etoposide_AML_90min_3_81_194	245.53	0	-1
Etoposide_AML_90min_3_81_177	245.53	0	-258.51
Etoposide_AML_90min_7_98_299	245.45	0	-1
Etoposide_AML_90min_7_98_200	245.45	0	-1
Etoposide_AML_90min_4_98_228	245.24	0	-1
Etoposide_AML_90min_4_98_195	245.24	-142.82	-1
Etoposide_AML_0min_6_62_170	245.02	0	-1
Etoposide_AML_0min_6_62_130	245.02	0	-1
Etoposide_AML_90min_5_64_148	244.84	0	-129.45
Etoposide_AML_90min_5_64_124	244.84	-142.82	-174.53
Etoposide_AML_0min_6_8_23	244.67	-142.82	-22.2
Etoposide_AML_0min_6_8_18	244.67	-142.82	-194.98
Etoposide_AML_180min_1_27_47	243.94	-142.82	-116.22
Etoposide_AML_180min_1_27_62	243.94	-142.82	-184.52
Etoposide_AML_90min_5_65_126	243.84	0	-259.83
Etoposide_AML_90min_5_65_149	243.84	-142.82	-305.7
Etoposide_AML_180min_5_46_101	242.82	0	-319.33
Etoposide_AML_180min_5_46_122	242.82	-142.82	-331.47
Etoposide_AML_90min_4_93_218	242.13	0	-310.34
Etoposide_AML_90min_4_93_186	242.13	0	-346.13
Etoposide_AML_90min_5_23_44	242.01	-142.82	-33.62
Etoposide_AML_90min_5_23_50	242.01	-142.82	-156.37
Etoposide_AML_90min_1_22_44	241.86	-142.82	-102.74
Etoposide_AML_90min_1_22_54	241.86	-142.82	-303.25
Etoposide_AML_180min_1_31_70	241.82	-142.82	-79.42
Etoposide_AML_180min_1_31_53	241.82	-142.82	-198.4
Etoposide_AML_180min_6_82_230	241.71	-142.82	-120.84
Etoposide_AML_180min_6_82_171	241.71	-142.82	-350
Etoposide_AML_180min_1_27_46	241.57	0	-50.94
Etoposide_AML_180min_1_27_61	241.57	0	-243.64
Etoposide_AML_180min_3_1_2	241.25	0	-1
Etoposide_AML_180min_3_1_4	241.25	0	-1
Etoposide_AML_180min_2_0_0	240.69	0	-178.32
Etoposide_AML_180min_2_0_0	240.69	0	-234.63
Etoposide_AML_90min_9_97_197	240.47	0	-82.45
Etoposide_AML_90min_9_97_287	240.47	0	-230.49
Etoposide_AML_180min_7_88_185	240.43	-142.82	-1
Etoposide_AML_180min_7_88_268	240.43	-142.82	-426.67
Etoposide_AML_90min_4_6_10	240.09	-142.82	-14.22
Etoposide_AML_90min_4_6_15	240.09	-142.82	-142.23
Etoposide_AML_90min_1_25_58	239.71	285.64	189.94
Etoposide_AML_90min_1_25_47	239.71	0	-33.55
Etoposide_AML_90min_5_84_192	239.62	0	-39.99
Etoposide_AML_90min_5_84_163	239.62	0	-136.63
Etoposide_AML_90min_6_79_234	239.32	0	-279.51
Etoposide_AML_90min_6_79_173	239.32	0	-315.32
Etoposide_AML_90min_3_66_147	239.28	0	-112.2
Etoposide_AML_90min_3_66_162	239.28	-428.46	-188.15
Etoposide_AML_90min_3_65_160	238.67	0	1
Etoposide_AML_90min_3_65_145	238.67	0	-1
Etoposide_AML_180min_5_82_175	238.13	-142.82	-299.68
Etoposide_AML_180min_5_82_212	238.13	-142.82	-314.13
Etoposide_AML_90min_8_55_112	237.52	-142.82	-213.82
Etoposide_AML_90min_8_55_152	237.52	-142.82	-215.35
Etoposide_AML_90min_5_58_112	237.48	-285.64	-137.71
Etoposide_AML_90min_5_58_134	237.48	-285.64	-139.03
Etoposide_AML_180min_5_66_170	237.32	0	-172.32
Etoposide_AML_180min_5_66_144	237.32	0	-352.15
Etoposide_AML_0min_3_83_243	236.88	-142.82	-1
Etoposide_AML_0min_3_83_171	236.88	0	-48.48
Etoposide_AML_180min_6_2_5	236.66	0	-57.72
Etoposide_AML_180min_6_2_7	236.66	0	-250.89
Etoposide_AML_90min_3_36_93	236.13	-142.82	-275.27
Etoposide_AML_90min_3_36_85	236.13	-142.82	-276.1
Etoposide_AML_90min_2_84_167	235.9	-142.82	-1
Etoposide_AML_90min_2_84_212	235.9	-142.82	-274.97
Etoposide_AML_180min_5_36_96	235.88	0	-254.26
Etoposide_AML_180min_5_36_79	235.88	0	-363.27
Etoposide_AML_90min_3_29_76	235.78	-142.82	-261.32
Etoposide_AML_90min_3_29_69	235.78	-142.82	-356.91
Etoposide_AML_90min_2_4_12	235.56	-142.82	-1
Etoposide_AML_90min_2_4_9	235.56	0	-1
Etoposide_AML_0min_6_80_201	235.48	0	-238.03
Etoposide_AML_0min_6_80_166	235.48	0	-345.59
Etoposide_AML_90min_4_47_116	235.27	-142.82	-259.98
Etoposide_AML_90min_4_47_94	235.27	0	-279.51
Etoposide_AML_90min_3_61_151	235.15	0	-1
Etoposide_AML_90min_3_61_136	235.15	0	-329.64
Etoposide_AML_90min_4_90_180	235.08	0	-162.96
Etoposide_AML_90min_4_90_212	235.08	0	-308.28
Etoposide_AML_0min_6_91_228	234.98	0	-42
Etoposide_AML_0min_6_91_190	234.98	0	-134.12
Etoposide_AML_0min_5_41_83	234.5	-142.82	-238.21
Etoposide_AML_0min_5_41_106	234.5	-142.82	-374.55
Etoposide_AML_90min_1_50_127	234.42	-142.82	-21.37
Etoposide_AML_90min_1_50_97	234.42	-142.82	-300.6
Etoposide_AML_0min_3_8_17	234.15	-142.82	-28.19
Etoposide_AML_0min_3_8_26	234.15	-142.82	-257.23
Etoposide_AML_0min_3_90_261	233.53	-142.82	-310.55
Etoposide_AML_0min_3_90_187	233.53	0	-338.78
Etoposide_AML_180min_1_67_109	232.85	0	-146.04
Etoposide_AML_180min_1_67_147	232.85	0	-330.4
Etoposide_AML_0min_4_89_223	232.81	0	-1
Etoposide_AML_0min_4_89_193	232.81	0	-1
Etoposide_AML_90min_1_15_36	232.73	-142.82	-74.86
Etoposide_AML_90min_1_15_30	232.73	0	-166.4
Etoposide_AML_180min_7_46_158	232.44	-142.82	-311.98
Etoposide_AML_180min_7_46_104	232.44	-142.82	-389.1
Etoposide_AML_180min_5_30_77	232.29	-142.82	-70.5
Etoposide_AML_180min_5_30_64	232.29	-142.82	-104.5
Etoposide_AML_180min_1_61_135	232.27	-142.82	-42.57
Etoposide_AML_180min_1_61_97	232.27	-142.82	-165.88
Etoposide_AML_90min_3_62_139	231.54	0	-107.48
Etoposide_AML_90min_3_62_153	231.54	0	-337.89
Etoposide_AML_0min_3_47_149	231.45	-142.82	-295.94
Etoposide_AML_0min_3_47_97	231.45	-142.82	-334.8
Etoposide_AML_90min_6_22_50	231.41	-142.82	-319.08
Etoposide_AML_90min_6_22_59	231.41	-142.82	-340.81
Etoposide_AML_0min_3_84_245	231.02	-142.82	-1
Etoposide_AML_90min_1_32_78	231.02	0	-1
Etoposide_AML_0min_3_84_173	231.02	-142.82	-1
Etoposide_AML_90min_1_32_64	231.02	0	-1
Etoposide_AML_0min_4_90_225	230.89	0	-65.59
Etoposide_AML_0min_4_90_195	230.89	0	-163.63
Etoposide_AML_0min_4_10_20	230.71	0	-305.28
Etoposide_AML_0min_4_10_27	230.71	0	-314.03
Etoposide_AML_90min_9_2_6	230.63	0	-260.25
Etoposide_AML_90min_9_2_6	230.63	-142.82	-335.17
Etoposide_AML_0min_3_59_184	230.53	0	-132.9
Etoposide_AML_0min_3_59_123	230.53	0	-301.69
Etoposide_AML_180min_3_22_38	229.66	0	-319.11
Etoposide_AML_180min_3_22_59	229.66	0	-356.46
Etoposide_AML_90min_6_43_119	228.66	-142.82	-1
Etoposide_AML_90min_6_43_89	228.66	-142.82	-1
Etoposide_AML_90min_4_54_132	228.32	0	-1
Etoposide_AML_90min_4_54_110	228.32	0	-1
Etoposide_AML_90min_2_47_95	228.01	0	-18.23
Etoposide_AML_90min_2_47_121	228.01	0	-45.68
Etoposide_AML_90min_3_24_51	227.83	0	-145.39
Etoposide_AML_90min_3_24_58	227.83	0	-203.16
Etoposide_AML_180min_7_97_199	227.75	-142.82	-315.93
Etoposide_AML_180min_7_97_291	227.75	-142.82	-420.65
Etoposide_AML_90min_4_86_202	227.58	0	-1
Etoposide_AML_90min_4_86_171	227.58	0	-1
Etoposide_AML_180min_6_5_10	227.55	0	-396.89
Etoposide_AML_180min_6_5_16	227.55	0	-408.75
Etoposide_AML_0min_7_24_71	226.97	-142.82	-2.28
Etoposide_AML_0min_7_24_54	226.97	-142.82	-153.06
Etoposide_AML_180min_4_49_113	226.91	0	-139.15
Etoposide_AML_180min_4_49_103	226.91	0	-298.27
Etoposide_AML_90min_5_36_83	226.79	-142.82	-56.79
Etoposide_AML_90min_5_36_69	226.79	0	-92.21
Etoposide_AML_90min_4_98_229	226.56	-285.64	1
Etoposide_AML_90min_4_98_196	226.56	-428.46	1
Etoposide_AML_90min_5_13_25	226.35	0	-23.03
Etoposide_AML_90min_5_13_31	226.35	0	-145.74
Etoposide_AML_180min_6_78_162	226.29	-142.82	-30.58
Etoposide_AML_180min_6_78_218	226.29	-142.82	-140.25
Etoposide_AML_0min_7_56_116	226.05	0	1
Etoposide_AML_0min_7_56_156	226.05	-142.82	-11.26
Etoposide_AML_90min_4_32_86	225.72	0	-232.46
Etoposide_AML_90min_4_32_68	225.72	0	-310.1
Etoposide_AML_180min_1_29_65	225.7	0	-35.66
Etoposide_AML_180min_1_29_50	225.7	0	-140.63
Etoposide_AML_0min_7_73_150	225.33	-142.82	-241.71
Etoposide_AML_0min_7_73_195	225.33	-142.82	-333.24
Etoposide_AML_90min_9_19_41	224.92	-142.82	-75.74
Etoposide_AML_90min_9_19_63	224.92	-142.82	-184.88
Etoposide_AML_0min_1_82_183	224.91	-142.82	-16.14
Etoposide_AML_0min_1_82_276	224.91	-142.82	-26.61
Etoposide_AML_0min_5_92_187	224.38	0	-195.25
Etoposide_AML_0min_5_92_219	224.38	0	-282.94
Etoposide_AML_90min_9_58_122	224.33	0	-180.34
Etoposide_AML_90min_9_58_177	224.33	0	-227.85
Etoposide_AML_180min_2_52_105	223.85	0	-130.07
Etoposide_AML_180min_2_52_124	223.85	0	-334.13
Etoposide_AML_90min_1_60_118	223.64	-142.82	-2.22
Etoposide_AML_90min_1_60_153	223.64	-142.82	-202.61
Etoposide_AML_180min_5_30_65	223.55	-142.82	-6.5
Etoposide_AML_180min_5_30_76	223.55	0	-94.18
Etoposide_AML_0min_6_8_24	222.69	-142.82	-349.73
Etoposide_AML_0min_6_8_19	222.69	-142.82	-374.95
Etoposide_AML_0min_5_69_141	222.46	-142.82	-8.24
Etoposide_AML_0min_5_69_168	222.46	-142.82	-215.33
Etoposide_AML_0min_4_55_121	222.46	0	-309.25
Etoposide_AML_0min_4_55_141	222.46	0	-309.92
Etoposide_AML_90min_5_10_19	222.41	-142.82	-187.44
Etoposide_AML_90min_5_10_24	222.41	0	-300.36
Etoposide_AML_0min_5_86_175	222.13	0	-62.94
Etoposide_AML_0min_5_86_206	222.13	0	-210.84
Etoposide_AML_180min_5_80_171	221.3	-428.46	-132.41
Etoposide_AML_180min_5_80_209	221.3	0	-264.97
Etoposide_AML_0min_4_92_229	221.26	-142.82	-152.27
Etoposide_AML_0min_4_92_198	221.26	-142.82	-308.98
Etoposide_AML_90min_8_98_266	221.05	0	-1
Etoposide_AML_90min_8_98_198	221.05	0	-1
Etoposide_AML_90min_8_42_118	221.02	-142.82	-1
Etoposide_AML_90min_8_42_87	221.02	-142.82	-1
Etoposide_AML_180min_2_59_118	220.81	0	-5.29
Etoposide_AML_180min_2_59_140	220.81	-142.82	-163.88
Etoposide_AML_180min_7_89_270	220.35	-142.82	-1
Etoposide_AML_180min_7_89_187	220.35	0	-1
Etoposide_AML_90min_9_82_171	220.15	-142.82	-1
Etoposide_AML_90min_9_82_247	220.15	-142.82	-199.97
Etoposide_AML_180min_1_49_109	219.49	0	-1
Etoposide_AML_180min_1_49_80	219.49	0	-47.92
Etoposide_AML_180min_2_14_31	219.43	-142.82	-277.02
Etoposide_AML_180min_2_14_28	219.43	-142.82	-359.45
Etoposide_AML_0min_1_28_102	219.05	-428.46	-129.35
Etoposide_AML_0min_1_28_70	219.05	-428.46	-169.33
Etoposide_AML_0min_4_97_207	218.51	0	-330.41
Etoposide_AML_0min_4_97_241	218.51	-428.46	-373.58
Etoposide_AML_90min_3_45_112	218.42	-142.82	-20.32
Etoposide_AML_90min_3_45_102	218.42	0	-182.59
Etoposide_AML_180min_2_14_32	218.17	0	-174.7
Etoposide_AML_180min_2_14_27	218.17	0	-366.25
Etoposide_AML_90min_2_0_0	217.86	-142.82	-98.02
Etoposide_AML_90min_2_0_0	217.86	-142.82	-284.51
Etoposide_AML_180min_6_42_122	217.76	-142.82	-320.07
Etoposide_AML_180min_6_42_86	217.76	-142.82	-403.57
Etoposide_AML_0min_5_72_148	217.75	-142.82	-80.63
Etoposide_AML_0min_5_72_175	217.75	-142.82	-182.55
Etoposide_AML_180min_7_67_212	217.52	0	-219.76
Etoposide_AML_180min_7_67_143	217.52	0	-223.17
Etoposide_AML_180min_1_13_27	217.41	-142.82	-307.99
Etoposide_AML_180min_1_13_24	217.41	-142.82	-311.11
Etoposide_AML_90min_2_48_124	217.07	0	-1
Etoposide_AML_90min_2_48_97	217.07	-428.46	-1
Etoposide_AML_0min_3_8_27	216.92	-142.82	-104.37
Etoposide_AML_0min_3_8_18	216.92	-142.82	-114.86
Etoposide_AML_90min_6_22_51	216.59	-142.82	-325.53
Etoposide_AML_90min_6_22_60	216.59	0	-327.03
Etoposide_AML_0min_4_94_201	216.32	-142.82	-230.24
Etoposide_AML_0min_4_94_233	216.32	0	-349.51
Etoposide_AML_0min_2_89_283	216.31	0	-139.23
Etoposide_AML_0min_2_89_174	216.31	0	-335.4
Etoposide_AML_90min_3_65_159	215.94	0	-1
Etoposide_AML_90min_3_65_144	215.94	0	-1
Etoposide_AML_90min_1_85_216	215.2	-142.82	-198.12
Etoposide_AML_90min_1_85_164	215.2	-142.82	-219.07
Etoposide_AML_180min_2_3_5	215.19	0	-40.21
Etoposide_AML_180min_2_3_6	215.19	0	-163.82
Etoposide_AML_0min_4_72_158	214.96	0	-226.51
Etoposide_AML_0min_4_72_181	214.96	0	-341.12
Etoposide_AML_0min_3_75_156	214.93	0	-100.84
Etoposide_AML_0min_3_75_224	214.93	0	-125.77
Etoposide_AML_0min_5_94_190	214.88	-142.82	-374.26
Etoposide_AML_0min_5_94_222	214.88	-142.82	-375.13
Etoposide_AML_0min_4_49_126	214.87	0	-1
Etoposide_AML_0min_4_49_109	214.87	-142.82	-339.61
Etoposide_AML_180min_1_69_113	214.58	-142.82	-1
Etoposide_AML_180min_1_69_150	214.58	-142.82	-1
Etoposide_AML_90min_3_13_35	214.2	-142.82	-239.8
Etoposide_AML_90min_3_13_30	214.2	-142.82	-322.54
Etoposide_AML_180min_5_96_246	214.15	-142.82	-303.14
Etoposide_AML_180min_5_96_205	214.15	-142.82	-347.15
Etoposide_AML_90min_4_67_135	214.12	0	-1.42
Etoposide_AML_90min_4_67_159	214.12	0	-250.46
Etoposide_AML_180min_1_13_28	214.1	-142.82	-101.39
Etoposide_AML_180min_1_13_23	214.1	0	-106.68
Etoposide_AML_90min_2_55_140	214.09	0	-56.35
Etoposide_AML_90min_2_55_111	214.09	0	-132.06
Etoposide_AML_180min_3_11_19	213.8	-142.82	-284.22
Etoposide_AML_180min_3_11_31	213.8	-142.82	-344.43
Etoposide_AML_90min_5_6_15	213.7	-142.82	-1
Etoposide_AML_90min_5_6_11	213.7	-142.82	-1
Etoposide_AML_180min_3_27_183	213.65	0	-4.46
Etoposide_AML_180min_3_27_108	213.65	-142.82	-358.85
Etoposide_AML_90min_7_98_300	213.63	-142.82	-17.47
Etoposide_AML_90min_7_98_199	213.63	-142.82	-192.46
Etoposide_AML_90min_5_56_108	213.32	-142.82	-162.04
Etoposide_AML_90min_5_56_130	213.32	-142.82	-328.28
Etoposide_AML_0min_3_66_136	213.29	-142.82	-209.8
Etoposide_AML_0min_3_66_199	213.29	-142.82	-323.77
Etoposide_AML_0min_3_86_252	213.06	-285.64	-88.28
Etoposide_AML_0min_3_86_178	213.06	-428.46	-166.7
Etoposide_AML_90min_7_2_5	213	-142.82	-306.81
Etoposide_AML_90min_7_2_5	213	-142.82	-362.38
Etoposide_AML_0min_2_75_147	212.76	-142.82	-216.24
Etoposide_AML_0min_2_75_238	212.76	-142.82	-312.71
Etoposide_AML_180min_2_71_139	212.55	-142.82	0
Etoposide_AML_180min_2_71_167	212.55	0	-104.85
Etoposide_AML_90min_5_20_46	212.18	-142.82	-186.22
Etoposide_AML_90min_5_20_39	212.18	-142.82	-325.15
Etoposide_AML_0min_5_11_21	211.82	0	-151.44
Etoposide_AML_0min_5_11_28	211.82	0	-341.26
Etoposide_AML_180min_6_75_155	211.57	0	-266.86
Etoposide_AML_180min_6_75_212	211.57	-285.64	-281.68
Etoposide_AML_180min_4_18_31	211.53	-142.82	-400.54
Etoposide_AML_180min_4_18_41	211.53	-142.82	-407.72
Etoposide_AML_180min_5_66_169	211.47	-142.82	-65.97
Etoposide_AML_180min_5_66_143	211.47	-142.82	-266.41
Etoposide_AML_0min_4_44_113	210.84	-142.82	-28.73
Etoposide_AML_0min_4_44_99	210.84	-142.82	-36.74
Etoposide_AML_180min_3_27_73	210.52	-142.82	-0.43
Etoposide_AML_180min_3_27_46	210.52	-142.82	-401.41
Etoposide_AML_90min_2_36_97	209.71	-428.46	1
Etoposide_AML_90min_2_36_76	209.71	0	-1
Etoposide_AML_180min_6_54_154	208.88	0	-257.04
Etoposide_AML_180min_6_54_111	208.88	0	-276.84
Etoposide_AML_90min_8_41_84	208.8	-142.82	-31.96
Etoposide_AML_90min_8_41_115	208.8	-142.82	-336.22
Etoposide_AML_90min_1_15_29	208.72	0	-304.46
Etoposide_AML_90min_1_15_35	208.72	0	-308.07
Etoposide_AML_90min_3_40_102	208.38	-142.82	-43.24
Etoposide_AML_90min_3_40_92	208.38	-142.82	-352.16
Etoposide_AML_90min_3_11_26	207.94	0	-1
Etoposide_AML_90min_3_11_29	207.94	0	-168.61
Etoposide_AML_0min_4_10_19	207.85	-142.82	-141.12
Etoposide_AML_0min_4_10_26	207.85	-142.82	-149.82
Etoposide_AML_0min_1_55_193	207.76	0	-1
Etoposide_AML_0min_1_55_124	207.76	0	-1
Etoposide_AML_180min_4_3_5	207.4	-142.82	-320.24
Etoposide_AML_180min_4_3_4	207.4	-142.82	-356.62
Etoposide_AML_180min_2_74_142	207.32	0	-243.14
Etoposide_AML_180min_2_74_172	207.32	0	-294.13
Etoposide_AML_180min_4_92_215	206.68	-142.82	-24.04
Etoposide_AML_180min_4_92_187	206.68	0	-145.61
Etoposide_AML_90min_2_43_114	206.5	0	1
Etoposide_AML_90min_2_43_88	206.5	0	-312.8
Etoposide_AML_90min_4_64_129	206.3	0	-78.16
Etoposide_AML_90min_4_64_154	206.3	0	-188.39
Etoposide_AML_0min_5_71_145	205.84	0	-86.87
Etoposide_AML_0min_5_71_172	205.84	0	-109.48
Etoposide_AML_90min_4_18_49	205.57	0	-80.13
Etoposide_AML_90min_4_18_36	205.57	0	-264.17
Etoposide_AML_90min_4_81_194	205.37	0	-101.37
Etoposide_AML_90min_4_81_164	205.37	0	-239.72
Etoposide_AML_180min_2_4_7	205.12	-142.82	-58.03
Etoposide_AML_180min_2_4_9	205.12	-142.82	-252.21
Etoposide_AML_0min_5_54_135	204.9	0	-121.82
Etoposide_AML_0min_5_54_110	204.9	-142.82	-211.31
Etoposide_AML_0min_4_24_60	204.8	0	-1
Etoposide_AML_0min_4_24_50	204.8	0	-1
Etoposide_AML_90min_8_8_20	203.7	0	-1
Etoposide_AML_90min_8_8_23	203.7	0	-57.15
Etoposide_AML_90min_3_86_205	203.66	-142.82	-45.45
Etoposide_AML_90min_3_86_187	203.66	-142.82	-173.56
Etoposide_AML_90min_4_76_183	203.47	-142.82	-17.37
Etoposide_AML_90min_4_76_155	203.47	-142.82	-313.33
Etoposide_AML_180min_1_65_105	203.45	0	-1
Etoposide_AML_180min_1_65_143	203.45	0	-1
Etoposide_AML_90min_5_53_102	203.34	-142.82	-17.76
Etoposide_AML_90min_5_53_123	203.34	-142.82	-263.84
Etoposide_AML_0min_6_96_204	203.32	-428.46	1
Etoposide_AML_0min_6_96_242	203.32	-428.46	-107.91
Etoposide_AML_0min_4_9_17	203.29	0	-91.55
Etoposide_AML_0min_4_9_24	203.29	-142.82	-160.99
Etoposide_AML_180min_1_65_142	202.87	-142.82	-150.1
Etoposide_AML_180min_1_65_106	202.87	-142.82	-221.81
Etoposide_AML_90min_1_95_184	202.75	0	1
Etoposide_AML_90min_1_95_240	202.75	285.64	-1
Etoposide_AML_90min_7_72_227	202.59	0	-331.3
Etoposide_AML_90min_7_72_148	202.59	0	-361.81
Etoposide_AML_90min_8_80_160	202.43	0	-89.83
Etoposide_AML_90min_8_80_215	202.43	0	-274.1
Etoposide_AML_180min_1_62_100	201.85	-142.82	-113.71
Etoposide_AML_180min_1_62_137	201.85	-142.82	-307.13
Etoposide_AML_180min_7_68_214	201.65	0	-1
Etoposide_AML_180min_7_68_146	201.65	-142.82	-1
Etoposide_AML_90min_7_72_147	201.4	-142.82	-222.5
Etoposide_AML_90min_7_72_226	201.4	-142.82	-367.43
Etoposide_AML_0min_2_28_92	200.51	-142.82	-1
Etoposide_AML_0min_2_28_53	200.51	-142.82	-1
Etoposide_AML_0min_7_75_201	200.28	-142.82	-1
Etoposide_AML_0min_7_75_154	200.28	-142.82	-1
Etoposide_AML_90min_3_6_14	200.08	-285.64	-166.05
Etoposide_AML_90min_3_6_12	200.08	-285.64	-228.06
Etoposide_AML_90min_4_96_224	199.98	0	-1
Etoposide_AML_90min_4_96_192	199.98	0	-1
Etoposide_AML_0min_6_46_134	199.96	0	1
Etoposide_AML_0min_6_46_100	199.96	0	-1
Etoposide_AML_90min_3_33_78	199.7	-142.82	-13.45
Etoposide_AML_90min_3_33_88	199.7	-142.82	-249.12
Etoposide_AML_90min_3_32_85	199.25	-142.82	-65.49
Etoposide_AML_90min_3_32_76	199.25	0	-252.22
Etoposide_AML_90min_3_81_193	199.17	0	-155.42
Etoposide_AML_90min_3_81_176	199.17	0	-283.86
Etoposide_AML_90min_2_13_27	199.07	0	-80.22
Etoposide_AML_90min_2_13_33	199.07	-285.64	-250.04
Etoposide_AML_0min_5_54_134	198.97	-142.82	-1
Etoposide_AML_0min_5_54_109	198.97	-142.82	-1
Etoposide_AML_0min_4_48_124	198.13	-142.82	-327.13
Etoposide_AML_0min_4_48_107	198.13	-142.82	-355.5
Etoposide_AML_0min_6_59_164	197.66	0	-90.72
Etoposide_AML_0min_6_59_124	197.66	0	-190.18
Etoposide_AML_90min_6_90_200	197.62	0	-103.44
Etoposide_AML_90min_6_90_268	197.62	0	-267.46
Etoposide_AML_180min_1_28_49	197.35	0	-1
Etoposide_AML_180min_1_28_63	197.35	0	-1
Etoposide_AML_90min_9_48_98	196.74	0	-94.06
Etoposide_AML_90min_9_48_146	196.74	0	-232.67
Etoposide_AML_90min_2_86_216	196.48	0	-121.33
Etoposide_AML_90min_2_86_170	196.48	0	-154.05
Etoposide_AML_180min_3_45_115	196.16	0	-342.97
Etoposide_AML_180min_3_45_69	196.16	-142.82	-396.94
Etoposide_AML_90min_8_70_186	195.61	-142.82	-35.96
Etoposide_AML_90min_8_70_139	195.61	-142.82	-49.19
Etoposide_AML_90min_8_72_193	195.58	0	-123.68
Etoposide_AML_90min_8_72_143	195.58	0	-216.82
Etoposide_AML_90min_3_37_96	195.57	-142.82	-77.96
Etoposide_AML_90min_3_37_86	195.57	0	-113.82
Etoposide_AML_90min_8_12_33	195.51	-142.82	-1
Etoposide_AML_90min_8_12_27	195.51	-142.82	-1
Etoposide_AML_180min_2_36_80	195.5	-142.82	-295.41
Etoposide_AML_180min_2_36_88	195.5	-142.82	-388.24
Etoposide_AML_90min_5_14_27	195.46	0	-24.28
Etoposide_AML_90min_5_14_34	195.46	0	-193.63
Etoposide_AML_90min_9_29_59	195.38	-285.64	-187.54
Etoposide_AML_90min_9_29_89	195.38	-142.82	-313.25
Etoposide_AML_90min_4_87_173	195.06	-142.82	-100.24
Etoposide_AML_90min_4_87_205	195.06	-142.82	-217.14
Etoposide_AML_90min_3_80_174	194.17	0	-146.81
Etoposide_AML_90min_3_80_191	194.17	0	-242.65
Etoposide_AML_0min_4_71_179	194	0	-1
Etoposide_AML_0min_4_71_156	194	0	-1
Etoposide_AML_90min_3_17_38	193.79	0	-164.34
Etoposide_AML_90min_3_17_43	193.79	-142.82	-328.87
Etoposide_AML_90min_1_87_220	193.43	0	65.78
Etoposide_AML_90min_1_87_167	193.43	0	-157.14
Etoposide_AML_180min_1_3_5	192.93	0	-1
Etoposide_AML_180min_1_3_6	192.93	-142.82	-1
Etoposide_AML_180min_1_9_16	192.58	-142.82	-7.93
Etoposide_AML_180min_1_9_19	192.58	-142.82	-244.52
Etoposide_AML_90min_5_38_73	192.06	-142.82	-72.18
Etoposide_AML_90min_5_38_87	192.06	0	-154.99
Etoposide_AML_90min_4_87_204	191.94	0	-238.65
Etoposide_AML_90min_4_87_174	191.94	0	-282.37
Etoposide_AML_90min_8_12_32	191.5	0	-79.99
Etoposide_AML_90min_8_12_26	191.5	-142.82	-170.23
Etoposide_AML_0min_7_14_34	191.38	-142.82	-314.63
Etoposide_AML_0min_7_14_47	191.38	0	-348.96
Etoposide_AML_90min_3_97_230	191.08	-142.82	-46.71
Etoposide_AML_90min_3_97_208	191.08	-142.82	-203.51
Etoposide_AML_90min_3_14_36	190.8	-142.82	-1
Etoposide_AML_90min_3_14_33	190.8	-142.82	-1
Etoposide_AML_90min_6_65_140	190.79	-142.82	-127.65
Etoposide_AML_90min_6_65_188	190.79	-142.82	-142.04
Etoposide_AML_0min_5_29_59	190.72	-142.82	-62.84
Etoposide_AML_0min_5_29_74	190.72	-142.82	-182.77
Etoposide_AML_0min_7_31_90	190.09	0	-34.53
Etoposide_AML_0min_7_31_69	190.09	0	-114.85
Etoposide_AML_180min_5_53_141	190	-285.64	1
Etoposide_AML_180min_5_53_114	190	0	1
Etoposide_AML_90min_5_21_41	189.68	-142.82	-43.46
Etoposide_AML_90min_5_21_48	189.68	0	-99.85
Etoposide_AML_0min_7_53_149	189.08	0	-1
Etoposide_AML_0min_7_53_110	189.08	-142.82	-1
Etoposide_AML_180min_3_24_40	188.48	0	-332.76
Etoposide_AML_180min_3_24_66	188.48	0	-400.29
Etoposide_AML_90min_6_33_72	188.45	-142.82	-263.65
Etoposide_AML_90min_6_33_89	188.45	-142.82	-327.08
Etoposide_AML_90min_3_16_40	188.06	0	-1
Etoposide_AML_90min_3_16_35	188.06	0	-1
Etoposide_AML_0min_6_81_169	187.77	0	1
Etoposide_AML_0min_6_81_203	187.77	0	-210.88
Etoposide_AML_90min_3_94_223	187.72	0	-133.31
Etoposide_AML_90min_3_94_202	187.72	0	-309.82
Etoposide_AML_90min_4_71_144	187.48	-142.82	-6.73
Etoposide_AML_90min_4_71_170	187.48	0	-37.3
Etoposide_AML_90min_4_96_225	187.44	-142.82	-229.02
Etoposide_AML_90min_4_96_191	187.44	-142.82	-345.22
Etoposide_AML_90min_5_63_146	187.09	0	-2.51
Etoposide_AML_90min_5_63_123	187.09	-142.82	-103.43
Etoposide_AML_180min_1_56_125	187.07	0	-304.25
Etoposide_AML_180min_1_56_89	187.07	0	-307.66
Etoposide_AML_180min_4_92_216	186.69	0	-321.51
Etoposide_AML_180min_4_92_188	186.69	0	-498.88
Etoposide_AML_0min_4_86_216	186.51	-142.82	-1
Etoposide_AML_0min_4_86_188	186.51	-142.82	-1
Etoposide_AML_90min_1_11_25	185.89	0	-1
Etoposide_AML_90min_1_11_21	185.89	0	-1
Etoposide_AML_90min_2_54_109	185.84	0	-146.28
Etoposide_AML_90min_2_54_138	185.84	0	-263.41
Etoposide_AML_90min_7_64_199	185.63	0	-279.39
Etoposide_AML_90min_7_64_130	185.63	0	-391.22
Etoposide_AML_180min_7_97_290	185.3	0	-10.17
Etoposide_AML_180min_7_97_198	185.3	0	-193.86
Etoposide_AML_90min_6_62_181	185.01	-142.82	-135.31
Etoposide_AML_90min_6_62_134	185.01	-142.82	-201.63
Etoposide_AML_0min_4_49_125	184.85	-142.82	-382.1
Etoposide_AML_0min_4_49_108	184.85	-142.82	-388.17
Etoposide_AML_0min_5_88_210	184.71	-142.82	-322.91
Etoposide_AML_0min_5_88_179	184.71	-142.82	-344.83
Etoposide_AML_90min_1_8_16	184.63	-142.82	-178.8
Etoposide_AML_90min_1_8_17	184.63	-142.82	-247.55
Etoposide_AML_180min_1_23_50	184.37	-142.82	-258.54
Etoposide_AML_180min_1_23_39	184.37	-142.82	-262.34
Etoposide_AML_0min_6_9_20	184.29	0	-243.87
Etoposide_AML_0min_6_9_26	184.29	0	-328.29
Etoposide_AML_0min_7_90_237	183.97	0	-1
Etoposide_AML_0min_7_90_187	183.97	0	-192.43
Etoposide_AML_90min_1_17_40	183.9	-142.82	-1
Etoposide_AML_90min_1_17_33	183.9	-142.82	-1
Etoposide_AML_90min_4_54_133	183.89	0	-1
Etoposide_AML_90min_4_54_109	183.89	0	-219.48
Etoposide_AML_0min_4_91_227	183.79	0	-1
Etoposide_AML_0min_4_91_197	183.79	0	-1
Etoposide_AML_90min_4_37_77	183.1	-142.82	-260.02
Etoposide_AML_90min_4_37_97	183.1	-142.82	-355.47
Etoposide_AML_180min_1_7_16	183.01	-142.82	-184.23
Etoposide_AML_180min_1_7_13	183.01	-142.82	-243.68
Etoposide_AML_90min_5_30_69	182.65	-142.82	-37.41
Etoposide_AML_90min_5_30_58	182.65	-142.82	-123.01
Etoposide_AML_0min_4_92_199	182.14	-142.82	-300.39
Etoposide_AML_0min_4_92_228	182.14	-142.82	-303.88
Etoposide_AML_0min_7_62_128	182.01	-142.82	-30.98
Etoposide_AML_0min_7_62_170	182.01	-142.82	-366.08
Etoposide_AML_180min_6_65_190	181.56	-142.82	-1
Etoposide_AML_180min_6_65_136	181.56	-142.82	-1
Etoposide_AML_0min_4_80_176	181.25	-142.82	-24.84
Etoposide_AML_0min_4_80_202	181.25	-142.82	-252.18
Etoposide_AML_90min_2_43_89	181.2	-428.46	-196.1
Etoposide_AML_90min_2_43_113	181.2	0	-268.8
Etoposide_AML_90min_2_6_17	181.09	0	1
Etoposide_AML_90min_2_6_14	181.09	0	-273.58
Etoposide_AML_90min_8_63_127	180.91	0	-78.79
Etoposide_AML_90min_8_63_170	180.91	0	-218.01
Etoposide_AML_0min_7_94_247	180.84	-142.82	-320.92
Etoposide_AML_0min_7_94_196	180.84	-142.82	-359.04
Etoposide_AML_90min_5_31_72	180.59	-428.46	1
Etoposide_AML_90min_5_31_60	180.59	0	-1
Etoposide_AML_90min_4_6_11	180.23	-142.82	-219.53
Etoposide_AML_90min_4_6_16	180.23	-142.82	-344.77
Etoposide_AML_90min_7_60_188	179.71	-142.82	-1
Etoposide_AML_90min_7_60_122	179.71	0	-1
Etoposide_AML_90min_4_39_100	179.68	-142.82	-1
Etoposide_AML_90min_4_39_80	179.68	0	-1
Etoposide_AML_90min_4_81_193	179.58	0	-8.26
Etoposide_AML_90min_4_81_163	179.58	-142.82	-16.99
Etoposide_AML_90min_2_76_193	179.49	0	-1
Etoposide_AML_90min_2_76_151	179.49	0	-1
Etoposide_AML_0min_5_86_205	179.38	0	-1
Etoposide_AML_0min_5_86_174	179.38	0	-1
Etoposide_AML_90min_4_28_71	179.34	0	-12.63
Etoposide_AML_90min_4_28_55	179.34	0	-134.36
Etoposide_AML_0min_7_60_125	179.11	-142.82	-141.49
Etoposide_AML_0min_7_60_167	179.11	-142.82	-202.41
Etoposide_AML_180min_2_21_43	178.91	0	-120.77
Etoposide_AML_180min_2_21_48	178.91	0	-137.99
Etoposide_AML_0min_3_76_159	178.29	0	-318.26
Etoposide_AML_0min_3_76_226	178.29	-142.82	-321.43
Etoposide_AML_0min_4_90_224	178.21	0	-280.73
Etoposide_AML_0min_4_90_194	178.21	0	-306.21
Etoposide_AML_90min_5_93_213	177.62	0	-1
Etoposide_AML_90min_5_93_178	177.62	-285.64	-1
Etoposide_AML_180min_4_84_171	177.32	0	-140.43
Etoposide_AML_180min_4_84_196	177.32	0	-313
Etoposide_AML_0min_2_83_160	176.2	-142.82	-47.26
Etoposide_AML_0min_2_83_263	176.2	-142.82	-173.91
Etoposide_AML_90min_3_21_53	175.94	-142.82	-291.3
Etoposide_AML_90min_3_21_46	175.94	-142.82	-344.53
Etoposide_AML_90min_5_3_7	175.84	-142.82	-1
Etoposide_AML_90min_5_3_10	175.84	-142.82	-72.77
Etoposide_AML_90min_3_87_207	175.56	0	-1
Etoposide_AML_90min_3_87_189	175.56	0	-1
Etoposide_AML_0min_4_31_68	175.49	0	-170.8
Etoposide_AML_0min_4_31_83	175.49	0	-182.98
Etoposide_AML_90min_2_13_28	175.38	-142.82	-3.9
Etoposide_AML_90min_2_13_32	175.38	-142.82	-38.35
Etoposide_AML_90min_9_63_191	175.06	0	-262.43
Etoposide_AML_90min_9_63_132	175.06	0	-316.46
Etoposide_AML_0min_3_84_174	175.04	0	-66.04
Etoposide_AML_0min_3_84_246	175.04	-428.46	-113.31
Etoposide_AML_180min_1_3_4	174.92	-142.82	-1
Etoposide_AML_180min_1_3_7	174.92	-142.82	-1
Etoposide_AML_0min_4_25_51	174.91	-142.82	-31.29
Etoposide_AML_0min_4_25_62	174.91	-142.82	-41.19
Etoposide_AML_90min_8_37_75	174.9	-428.46	-227.18
Etoposide_AML_90min_8_37_105	174.9	0	-346.59
Etoposide_AML_0min_7_31_70	174.09	0	-338.62
Etoposide_AML_0min_7_31_89	174.09	0	-355.06
Etoposide_AML_90min_3_48_120	173.95	0	-1
Etoposide_AML_90min_3_48_109	173.95	0	-1
Etoposide_AML_90min_5_70_136	173.75	-142.82	-38.87
Etoposide_AML_90min_5_70_160	173.75	-142.82	-161.14
Etoposide_AML_90min_4_49_121	173.64	0	-131.06
Etoposide_AML_90min_4_49_99	173.64	0	-232.61
Etoposide_AML_180min_4_84_172	173.37	0	-1
Etoposide_AML_180min_4_84_197	173.37	0	-315.65
Etoposide_AML_0min_7_43_121	173.26	0	-20.48
Etoposide_AML_0min_7_43_91	173.26	0	-101.65
Etoposide_AML_0min_7_89_234	173.19	0	-1
Etoposide_AML_0min_7_89_185	173.19	0	-1
Etoposide_AML_180min_4_33_64	173.15	-142.82	-260.28
Etoposide_AML_180min_4_33_70	173.15	-142.82	-345.34
Etoposide_AML_0min_5_89_213	173.1	-142.82	-152.34
Etoposide_AML_0min_5_89_181	173.1	-142.82	-175.13
Etoposide_AML_90min_8_63_126	173.05	0	-189.35
Etoposide_AML_90min_8_63_169	173.05	0	-271.29
Etoposide_AML_90min_8_44_91	172.96	-142.82	-193.13
Etoposide_AML_90min_8_44_123	172.96	-142.82	-342.98
Etoposide_AML_0min_3_54_111	172.95	-142.82	-294.62
Etoposide_AML_0min_3_54_170	172.95	-142.82	-334.18
Etoposide_AML_0min_4_78_196	172.73	0	-28.29
Etoposide_AML_0min_4_78_171	172.73	0	-101.09
Etoposide_AML_90min_2_64_130	172.7	0	-7.98
Etoposide_AML_90min_2_64_165	172.7	0	-140.29
Etoposide_AML_90min_3_72_175	172.67	0	-13.71
Etoposide_AML_90min_3_72_159	172.67	0	-21.39
Etoposide_AML_90min_3_39_100	172.66	-142.82	-58.86
Etoposide_AML_90min_3_39_90	172.66	-142.82	-72.84
Etoposide_AML_90min_4_39_101	172.4	0	-156.26
Etoposide_AML_90min_4_39_81	172.4	0	-276.85
Etoposide_AML_90min_5_3_9	172.12	0	-166.26
Etoposide_AML_90min_5_3_6	172.12	0	-215.24
Etoposide_AML_90min_2_61_123	171.34	0	-203.15
Etoposide_AML_90min_2_61_157	171.34	0	-317.08
Etoposide_AML_90min_8_61_164	171.32	428.46	229.54
Etoposide_AML_90min_8_61_123	171.32	428.46	90.5
Etoposide_AML_90min_1_17_39	170.82	-142.82	-1
Etoposide_AML_90min_1_17_34	170.82	0	-1
Etoposide_AML_180min_3_5_9	170.27	-142.82	-1
Etoposide_AML_180min_3_5_16	170.27	-142.82	-1
Etoposide_AML_180min_2_83_159	170.03	0	-164.88
Etoposide_AML_180min_2_83_192	170.03	0	-307.91
Etoposide_AML_90min_6_18_40	169.72	-142.82	-36.96
Etoposide_AML_90min_6_18_49	169.72	0	-109.68
Etoposide_AML_180min_4_11_24	169.06	-142.82	-29.88
Etoposide_AML_180min_4_11_18	169.06	-142.82	-30.96
Etoposide_AML_90min_1_53_135	168.84	-142.82	-103.82
Etoposide_AML_90min_1_53_104	168.84	0	-132.21
Etoposide_AML_90min_2_68_137	168.54	0	-117.31
Etoposide_AML_90min_2_68_174	168.54	-428.46	-242.17
Etoposide_AML_90min_2_73_187	168.38	0	-119.4
Etoposide_AML_90min_2_73_146	168.38	0	-145.31
Etoposide_AML_90min_8_91_246	167.96	-142.82	-243.1
Etoposide_AML_90min_8_91_187	167.96	-142.82	-256.39
Etoposide_AML_90min_3_92_199	167.87	-142.82	-87.1
Etoposide_AML_90min_3_92_218	167.87	-142.82	-209.9
Etoposide_AML_0min_4_65_142	167.76	0	-169.96
Etoposide_AML_0min_4_65_166	167.76	0	-251.43
Etoposide_AML_180min_7_68_215	167.44	-142.82	-1
Etoposide_AML_180min_7_68_145	167.44	-142.82	-1
Etoposide_AML_0min_6_4_13	167.35	-142.82	-1
Etoposide_AML_0min_6_4_10	167.35	-142.82	-1
Etoposide_AML_90min_1_85_163	167.32	0	-304.74
Etoposide_AML_90min_1_85_215	167.32	0	-332.54
Etoposide_AML_180min_2_89_203	167.16	0	-111.44
Etoposide_AML_180min_2_89_167	167.16	0	-176.07
Etoposide_AML_180min_7_78_165	166.45	-142.82	-85.99
Etoposide_AML_180min_7_78_238	166.45	-142.82	-190.24
Etoposide_AML_90min_4_75_152	165.92	0	1
Etoposide_AML_90min_4_75_180	165.92	0	-258.98
Etoposide_AML_90min_8_52_107	164.91	0	-99.33
Etoposide_AML_90min_8_52_144	164.91	0	-231.22
Etoposide_AML_90min_5_96_218	164.46	0	-48.07
Etoposide_AML_90min_5_96_183	164.46	0	-135.17
Etoposide_AML_90min_6_41_87	164.14	-142.82	-146.08
Etoposide_AML_90min_6_41_113	164.14	-142.82	-268.22
Etoposide_AML_0min_7_48_101	164.1	-285.64	-293.05
Etoposide_AML_0min_7_48_134	164.1	-285.64	-373.31
Etoposide_AML_90min_3_20_50	163.9	0	-263.7
Etoposide_AML_90min_3_20_43	163.9	-142.82	-360.57
Etoposide_AML_0min_7_64_173	163.8	0	-155.68
Etoposide_AML_0min_7_64_133	163.8	0	-241.64
Etoposide_AML_0min_7_73_196	163.56	-142.82	-247.54
Etoposide_AML_0min_7_73_151	163.56	-142.82	-365.43
Etoposide_AML_90min_4_37_76	163.35	0	-218.54
Etoposide_AML_90min_4_37_96	163.35	0	-332.22
Etoposide_AML_90min_5_80_182	163.12	0	-1
Etoposide_AML_90min_5_80_156	163.12	0	-1
Etoposide_AML_180min_1_39_63	162.92	428.46	-1
Etoposide_AML_180min_1_39_87	162.92	-428.46	-1
Etoposide_AML_90min_3_11_30	162.9	-142.82	-1
Etoposide_AML_90min_3_11_27	162.9	-142.82	-1
Etoposide_AML_90min_4_62_150	162.66	0	-72.52
Etoposide_AML_90min_4_62_126	162.66	0	-75.84
Etoposide_AML_180min_6_89_248	162.59	-142.82	-300.89
Etoposide_AML_180min_6_89_185	162.59	-142.82	-400.31
Etoposide_AML_90min_6_60_130	162.54	0	-376.64
Etoposide_AML_90min_6_60_176	162.54	0	-385.08
Etoposide_AML_180min_1_46_75	162.48	0	-130.83
Etoposide_AML_180min_1_46_103	162.48	0	-276.87
Etoposide_AML_90min_5_49_94	162.46	0	1
Etoposide_AML_90min_5_49_111	162.46	-142.82	-280.26
Etoposide_AML_0min_5_62_153	162.31	-142.82	-22.69
Etoposide_AML_0min_5_62_126	162.31	0	-54.02
Etoposide_AML_90min_5_37_84	160.74	0	-1
Etoposide_AML_90min_5_37_70	160.74	0	-1
Etoposide_AML_0min_3_37_119	160.73	0	-66.71
Etoposide_AML_0min_3_37_76	160.73	0	-207.1
Etoposide_AML_90min_5_27_60	160.39	0	-98.49
Etoposide_AML_90min_5_27_52	160.39	0	-223.13
Etoposide_AML_90min_3_59_147	160.32	-142.82	-1
Etoposide_AML_90min_3_59_132	160.32	-142.82	-1
Etoposide_AML_90min_2_54_108	160.28	-142.82	-13.23
Etoposide_AML_90min_2_54_137	160.28	-142.82	-159.85
Etoposide_AML_90min_3_85_202	159.23	0	-1
Etoposide_AML_90min_3_85_184	159.23	0	-194.51
Etoposide_AML_0min_5_30_61	159.2	-142.82	-20.73
Etoposide_AML_0min_5_30_76	159.2	-142.82	-374.43
Etoposide_AML_0min_5_44_88	158.92	-142.82	-270.01
Etoposide_AML_0min_5_44_113	158.92	-142.82	-326.06
Etoposide_AML_0min_1_90_297	158.69	0	-43.37
Etoposide_AML_0min_1_90_200	158.69	0	-62.61
Etoposide_AML_90min_4_46_92	157.83	0	-208.63
Etoposide_AML_90min_4_46_115	157.83	0	-208.96
Etoposide_AML_0min_3_76_227	157.77	-142.82	-1
Etoposide_AML_0min_3_76_158	157.77	-142.82	-1
Etoposide_AML_0min_4_75_165	157.41	0	-13.21
Etoposide_AML_0min_4_75_188	157.41	0	-62.47
Etoposide_AML_180min_3_11_18	157.2	-142.82	-174.96
Etoposide_AML_180min_3_11_30	157.2	-142.82	-244.58
Etoposide_AML_180min_1_1_2	156.89	-142.82	-218.49
Etoposide_AML_180min_1_1_1	156.89	-142.82	-320.42
Etoposide_AML_90min_2_86_171	156.61	0	-30.89
Etoposide_AML_90min_2_86_217	156.61	0	-134.69
Etoposide_AML_90min_7_60_123	155.92	-428.46	-189.77
Etoposide_AML_90min_7_60_189	155.92	0	-251.93
Etoposide_AML_90min_4_56_137	155.79	-142.82	-1
Etoposide_AML_90min_4_56_113	155.79	-142.82	-1
Etoposide_AML_90min_9_27_55	155.76	0	-151.12
Etoposide_AML_90min_9_27_85	155.76	0	-193.49
Etoposide_AML_0min_4_98_242	155.41	0	-1
Etoposide_AML_0min_4_98_210	155.41	-285.64	-1
Etoposide_AML_180min_5_91_194	155.37	-142.82	-204.26
Etoposide_AML_180min_5_91_234	155.37	-142.82	-267.53
Etoposide_AML_90min_3_48_110	155.11	0	-1
Etoposide_AML_90min_3_48_121	155.11	0	-346
Etoposide_AML_180min_4_58_130	155.05	0	-1
Etoposide_AML_180min_4_58_120	155.05	0	-1
Etoposide_AML_180min_2_96_217	154.41	-142.82	-13.18
Etoposide_AML_180min_2_96_177	154.41	-142.82	-353.13
Etoposide_AML_0min_3_89_185	154.26	0	1
Etoposide_AML_0min_3_89_260	154.26	0	-111.33
Etoposide_AML_90min_6_40_111	154.05	0	-1
Etoposide_AML_90min_6_40_84	154.05	0	-1
Etoposide_AML_90min_5_62_143	153.66	0	-1
Etoposide_AML_90min_5_62_120	153.66	0	-1
Etoposide_AML_90min_8_70_187	153.66	0	-230.42
Etoposide_AML_90min_8_70_140	153.66	-142.82	-297.98
Etoposide_AML_90min_8_44_90	153.57	-142.82	-217.15
Etoposide_AML_90min_8_44_122	153.57	-142.82	-263.3
Etoposide_AML_90min_9_91_273	153.42	0	-20.86
Etoposide_AML_90min_9_91_187	153.42	-142.82	-269.96
Etoposide_AML_0min_4_19_51	153.38	-142.82	-279.77
Etoposide_AML_0min_4_19_41	153.38	-142.82	-358.02
Etoposide_AML_90min_2_49_126	153.24	0	-166.95
Etoposide_AML_90min_2_49_99	153.24	-285.64	-271.65
Etoposide_AML_180min_6_39_114	153.2	-142.82	-309.89
Etoposide_AML_180min_6_39_82	153.2	-142.82	-331.51
Etoposide_AML_180min_5_10_22	152.99	0	-1
Etoposide_AML_180min_5_10_19	152.99	0	-1
Etoposide_AML_180min_6_74_211	152.6	0	-1
Etoposide_AML_180min_6_74_154	152.6	0	-1
Etoposide_AML_0min_4_24_61	152.38	0	-1
Etoposide_AML_0min_4_24_49	152.38	0	-1
Etoposide_AML_90min_2_23_48	151.87	0	-238.18
Etoposide_AML_90min_2_23_60	151.87	0	-282
Etoposide_AML_90min_2_71_183	150.83	0	-1
Etoposide_AML_90min_2_71_143	150.83	0	-1
Etoposide_AML_180min_3_12_20	150.35	0	-1
Etoposide_AML_180min_3_12_32	150.35	0	-1
Etoposide_AML_0min_4_95_235	150.21	-428.46	340.93
Etoposide_AML_0min_4_95_204	150.21	0	-28.15
Etoposide_AML_90min_6_33_90	150.03	0	-251.52
Etoposide_AML_90min_6_33_73	150.03	0	-282.73
Etoposide_AML_180min_2_25_55	149.73	0	-1
Etoposide_AML_180min_2_25_56	149.73	0	-1
Etoposide_AML_90min_1_90_175	149.49	0	-67.71
Etoposide_AML_90min_1_90_228	149.49	0	-123.59
Etoposide_AML_90min_3_35_83	149.42	0	-112.36
Etoposide_AML_90min_3_35_92	149.42	0	-231.49
Etoposide_AML_90min_3_40_91	149.3	0	-29.87
Etoposide_AML_90min_3_40_101	149.3	0	-37.15
Etoposide_AML_0min_4_97_240	149.21	-428.46	-295.68
Etoposide_AML_0min_4_97_208	149.21	0	-329.04
Etoposide_AML_180min_4_32_69	148.8	0	-33.52
Etoposide_AML_180min_4_32_63	148.8	0	-324.03
Etoposide_AML_180min_5_40_107	147.97	0	-295.78
Etoposide_AML_180min_5_40_88	147.97	0	-301.63
Etoposide_AML_0min_7_27_78	147.62	-142.82	-1
Etoposide_AML_0min_7_27_62	147.62	-142.82	-1
Etoposide_AML_90min_6_65_189	147.35	-142.82	-288.11
Etoposide_AML_90min_6_65_141	147.35	-142.82	-378.7
Etoposide_AML_0min_5_77_157	146.63	0	-56.42
Etoposide_AML_0min_5_77_184	146.63	0	-126.01
Etoposide_AML_90min_3_35_82	146.45	0	-46.1
Etoposide_AML_90min_3_35_91	146.45	0	-171.28
Etoposide_AML_0min_1_63_219	146.43	0	1
Etoposide_AML_0min_1_63_143	146.43	0	1
Etoposide_AML_0min_6_64_174	146.41	0	-1
Etoposide_AML_0min_6_64_135	146.41	0	-1
Etoposide_AML_0min_6_18_38	146.18	-142.82	-44.08
Etoposide_AML_0min_6_18_52	146.18	-142.82	-175.72
Etoposide_AML_90min_2_78_156	145.42	0	-255.12
Etoposide_AML_90min_2_78_196	145.42	-142.82	-259
Etoposide_AML_90min_1_95_185	145.38	-142.82	-1
Etoposide_AML_90min_1_95_239	145.38	0	-233.33
Etoposide_AML_180min_4_42_84	144.7	-142.82	-3.37
Etoposide_AML_180min_4_42_93	144.7	0	-397.74
Etoposide_AML_90min_3_55_139	144.53	0	1
Etoposide_AML_90min_3_55_125	144.53	0	1
Etoposide_AML_90min_9_19_40	144.52	0	-34
Etoposide_AML_90min_9_19_62	144.52	0	-56.91
Etoposide_AML_180min_3_55_87	144.16	0	-1
Etoposide_AML_180min_3_55_137	144.16	0	-275.21
Etoposide_AML_90min_4_68_161	143.56	-142.82	-68.02
Etoposide_AML_90min_4_68_137	143.56	-142.82	-174.62
Etoposide_AML_90min_4_8_20	142.84	0	-40.43
Etoposide_AML_90min_4_8_15	142.84	0	-96.37
Etoposide_AML_90min_2_0_1	142.45	-142.82	-76.29
Etoposide_AML_90min_2_0_1	142.45	-142.82	-129.16
Etoposide_AML_180min_4_14_23	142.42	-142.82	-55.39
Etoposide_AML_180min_4_14_31	142.42	-142.82	-134.14
Etoposide_AML_90min_3_70_170	142.37	0	1
Etoposide_AML_90min_3_70_154	142.37	0	-217.61
Etoposide_AML_90min_8_42_117	142.13	-142.82	-1
Etoposide_AML_90min_8_42_86	142.13	-142.82	-1
Etoposide_AML_0min_5_78_186	141.93	-142.82	-141.05
Etoposide_AML_0min_5_78_158	141.93	-142.82	-253.86
Etoposide_AML_90min_3_42_96	141.89	0	-18.02
Etoposide_AML_90min_3_42_107	141.89	-142.82	-103
Etoposide_AML_180min_6_31_91	141.63	-142.82	-1
Etoposide_AML_180min_6_31_66	141.63	-142.82	-304.07
Etoposide_AML_180min_6_52_108	141.63	-142.82	-304.96
Etoposide_AML_180min_6_52_149	141.63	-142.82	-418.01
Etoposide_AML_90min_4_24_48	141.58	-142.82	-43.57
Etoposide_AML_90min_4_24_61	141.58	-142.82	-88.44
Etoposide_AML_180min_1_57_126	141.49	0	-156.68
Etoposide_AML_180min_1_57_91	141.49	0	-270.31
Etoposide_AML_0min_5_2_5	141.36	-142.82	-1
Etoposide_AML_0min_5_2_4	141.36	-142.82	-1
Etoposide_AML_0min_5_50_127	140.27	-142.82	-1
Etoposide_AML_0min_5_50_103	140.27	-142.82	-1
Etoposide_AML_90min_3_32_86	140.15	-142.82	-195.21
Etoposide_AML_90min_3_32_77	140.15	-142.82	-267.46
Etoposide_AML_90min_5_44_82	139.96	-142.82	-200.15
Etoposide_AML_90min_5_44_100	139.96	-142.82	-277.92
Etoposide_AML_0min_7_45_126	139.75	-142.82	-33.33
Etoposide_AML_0min_7_45_93	139.75	0	-65.56
Etoposide_AML_90min_2_61_124	139.49	-142.82	-53.48
Etoposide_AML_90min_2_61_158	139.49	-142.82	-69.67
Etoposide_AML_90min_1_51_99	139.29	0	-202.58
Etoposide_AML_90min_1_51_128	139.29	0	-293.25
Etoposide_AML_0min_5_39_101	139.2	0	-44.93
Etoposide_AML_0min_5_39_79	139.2	0	-50.9
Etoposide_AML_0min_5_46_116	138.42	0	-1
Etoposide_AML_0min_5_46_92	138.42	0	-1
Etoposide_AML_180min_2_60_120	138.37	0	-1
Etoposide_AML_180min_2_60_142	138.37	0	-1
Etoposide_AML_90min_5_36_68	138.19	-142.82	-227.91
Etoposide_AML_90min_5_36_82	138.19	-142.82	-295.03
Etoposide_AML_90min_4_56_114	137.19	0	1
Etoposide_AML_90min_4_56_136	137.19	0	-1
Etoposide_AML_180min_2_16_32	136.32	-142.82	-175.96
Etoposide_AML_180min_2_16_34	136.32	-142.82	-261.52
Etoposide_AML_90min_2_64_164	136.2	0	-1
Etoposide_AML_90min_2_64_129	136.2	0	-1
Etoposide_AML_90min_7_45_137	135.73	-142.82	-1
Etoposide_AML_90min_7_45_93	135.73	-142.82	-1
Etoposide_AML_0min_7_60_124	135.21	-142.82	-330.93
Etoposide_AML_0min_7_60_166	135.21	-142.82	-368.48
Etoposide_AML_0min_6_32_67	134.97	-142.82	-216.13
[truncated: 393 more rows]

## Sheet: exp_2
Signal number	physical_distance	ellipsoid_distance	distance_to_surface
Etoposide_AML_180min_r2_10_42_128	1816.05	428.46	15
Etoposide_AML_180min_r2_10_42_89	1816.05	0	-247.17
Etoposide_AML_90min_r2_4_2_9	1762.12	285.64	220.45
Etoposide_AML_90min_r2_4_2_5	1762.12	0	-276.46
Etoposide_AML_90min_r2_2_28_74	1748.04	-142.82	-115.53
Etoposide_AML_90min_r2_2_28_88	1748.04	-142.82	-344.85
Etoposide_AML_180min_r2_10_62_183	1717.62	0	-137.94
Etoposide_AML_180min_r2_10_62_130	1717.62	-142.82	-219.83
Etoposide_AML_90min_r2_3_83_213	1673.7	-142.82	-15.54
Etoposide_AML_90min_r2_3_83_189	1673.7	-142.82	-19.31
Etoposide_AML_90min_r2_9_94_208	1643.42	0	-212.37
Etoposide_AML_90min_r2_9_94_211	1643.42	0	-293.92
Etoposide_AML_180min_r2_09_69_137	1629.1	-142.82	-164.72
Etoposide_AML_180min_r2_09_69_173	1629.1	0	-202.66
Etoposide_AML_90min_r2_5_82_186	1580.27	0	1
Etoposide_AML_90min_r2_5_82_165	1580.27	0	-309.32
Etoposide_AML_90min_r2_8_38_87	1507.18	0	-133.77
Etoposide_AML_90min_r2_8_38_86	1507.18	-142.82	-155.3
Etoposide_AML_90min_r2_6_64_145	1418.31	428.46	-1
Etoposide_AML_90min_r2_6_64_131	1418.31	0	-306.09
Etoposide_AML_180min_r2_04_62_135	1373.23	0	-208.3
Etoposide_AML_180min_r2_11_62_135	1373.23	0	-208.3
Etoposide_AML_180min_r2_11_62_167	1373.23	0	-234.07
Etoposide_AML_180min_r2_04_62_167	1373.23	0	-234.07
Etoposide_AML_90min_r2_2_87_205	1362.5	-142.82	-1.43
Etoposide_AML_90min_r2_2_87_247	1362.5	0	-337.1
Etoposide_AML_180min_r2_09_12_28	1315.46	0	-166.99
Etoposide_AML_180min_r2_09_12_31	1315.46	0	-173.74
Etoposide_AML_180min_r2_02_9_20	1300.4	0	-1
Etoposide_AML_180min_r2_02_9_97	1300.4	0	-1
Etoposide_AML_90min_r2_7_74_160	1285.13	0	-61.18
Etoposide_AML_90min_r2_7_74_166	1285.13	-142.82	-80.94
Etoposide_AML_90min_r2_3_57_130	1281.7	-142.82	-32.75
Etoposide_AML_90min_r2_3_57_148	1281.7	0	-163.85
Etoposide_AML_180min_r2_08_42_86	1273.84	0	-280.75
Etoposide_AML_180min_r2_08_42_108	1273.84	0	-287.73
Etoposide_AML_0min_r2_1_26_61	1192.9	0	-9.88
Etoposide_AML_0min_r2_1_26_72	1192.9	0	-377.7
Etoposide_AML_90min_r2_7_42_94	1186.25	0	-34.68
Etoposide_AML_90min_r2_7_42_99	1186.25	-142.82	-303.82
Etoposide_AML_90min_r2_8_48_104	1180.68	0	1
Etoposide_AML_90min_r2_8_48_107	1180.68	-142.82	-281.29
Etoposide_AML_90min_r2_8_65_137	1180.46	0	-1
Etoposide_AML_90min_r2_8_65_141	1180.46	-285.64	-1
Etoposide_AML_180min_r2_06_53_143	1177.05	-142.82	-1
Etoposide_AML_180min_r2_06_53_105	1177.05	-142.82	-94.53
Etoposide_AML_180min_r2_10_48_143	1166.59	-142.82	-43.5
Etoposide_AML_180min_r2_10_48_102	1166.59	0	-46.24
Etoposide_AML_90min_r2_5_39_77	1140.65	-142.82	-191.23
Etoposide_AML_90min_r2_5_39_90	1140.65	0	-249.74
Etoposide_AML_90min_r2_1_94_195	1120.68	-142.82	-31.81
Etoposide_AML_90min_r2_1_94_236	1120.68	0	-361.5
Etoposide_AML_90min_r2_7_19_48	1111.66	-142.82	-1
Etoposide_AML_90min_r2_7_19_48	1111.66	-142.82	-148.37
Etoposide_AML_90min_r2_4_70_157	1092.18	-142.82	-1
Etoposide_AML_90min_r2_4_70_151	1092.18	-142.82	-1
Etoposide_AML_90min_r2_5_19_45	1091.41	-142.82	-13.17
Etoposide_AML_90min_r2_5_19_40	1091.41	0	-317.51
Etoposide_AML_180min_r2_05_52_105	1083.28	0	-109.18
Etoposide_AML_180min_r2_05_52_138	1083.28	-142.82	-349.79
Etoposide_AML_90min_r2_3_43_99	1079.66	0	-226.46
Etoposide_AML_90min_r2_3_43_111	1079.66	-142.82	-317.39
Etoposide_AML_90min_r2_7_51_116	1071.26	0	-226.35
Etoposide_AML_90min_r2_7_51_119	1071.26	-142.82	-345.8
Etoposide_AML_180min_r2_05_26_49	1052.73	0	-143.95
Etoposide_AML_180min_r2_05_26_65	1052.73	-142.82	-322.3
Etoposide_AML_90min_r2_8_6_16	1040.37	-142.82	-142.09
Etoposide_AML_90min_r2_8_6_17	1040.37	0	-239.95
Etoposide_AML_90min_r2_5_69_139	1039.66	-142.82	-228.19
Etoposide_AML_90min_r2_5_69_161	1039.66	-142.82	-311.21
Etoposide_AML_180min_r2_07_22_48	1033.55	0	-21.9
Etoposide_AML_180min_r2_07_22_60	1033.55	0	-309.57
Etoposide_AML_90min_r2_5_92_209	1014.55	0	-159.24
Etoposide_AML_90min_r2_5_92_185	1014.55	0	-208.51
Etoposide_AML_180min_r2_09_39_81	1007.7	0	-116.5
Etoposide_AML_180min_r2_09_39_105	1007.7	-142.82	-336.04
Etoposide_AML_90min_r2_1_45_116	1000.84	-142.82	-202.46
Etoposide_AML_90min_r2_1_45_91	1000.84	0	-204.03
Etoposide_AML_180min_r2_05_20_38	987.65	-142.82	-111.19
Etoposide_AML_180min_r2_05_20_48	987.65	0	-129.1
Etoposide_AML_90min_r2_9_93_209	983.3	0	1
Etoposide_AML_90min_r2_9_93_206	983.3	0	-254.42
Etoposide_AML_0min_r2_2_40_82	975.8	0	-277.64
Etoposide_AML_0min_r2_2_40_113	975.8	-142.82	-278.22
Etoposide_AML_180min_r2_07_55_139	968.59	0	-189.18
Etoposide_AML_180min_r2_07_55_115	968.59	0	-231.05
Etoposide_AML_90min_r2_7_93_204	921.07	0	-9.32
Etoposide_AML_90min_r2_7_93_195	921.07	-142.82	-225.84
Etoposide_AML_180min_r2_11_58_129	917.61	0	-115.97
Etoposide_AML_180min_r2_04_58_129	917.61	0	-115.97
Etoposide_AML_180min_r2_04_58_159	917.61	0	-237.34
Etoposide_AML_180min_r2_11_58_159	917.61	0	-237.34
Etoposide_AML_90min_r2_9_50_122	910.98	-142.82	-26.97
Etoposide_AML_90min_r2_9_50_122	910.98	-142.82	-281.22
Etoposide_AML_90min_r2_2_87_246	907.98	-142.82	-130.22
Etoposide_AML_90min_r2_2_87_206	907.98	0	-204.92
Etoposide_AML_180min_r2_02_5_12	898.59	0	-1
Etoposide_AML_180min_r2_02_5_13	898.59	-142.82	-1
Etoposide_AML_180min_r2_10_57_122	896.83	0	-253.14
Etoposide_AML_180min_r2_10_57_168	896.83	0	-285.18
Etoposide_AML_90min_r2_2_93_218	877.75	0	-1
Etoposide_AML_90min_r2_2_93_261	877.75	0	-103.87
Etoposide_AML_180min_r2_11_59_160	864	0	-142.01
Etoposide_AML_180min_r2_04_59_160	864	0	-142.01
Etoposide_AML_180min_r2_04_59_132	864	0	-167.36
Etoposide_AML_180min_r2_11_59_132	864	0	-167.36
Etoposide_AML_0min_r2_6_5_12	851.84	-142.82	-258.12
Etoposide_AML_0min_r2_6_5_17	851.84	0	-340.7
Etoposide_AML_180min_r2_03_43_96	843.13	428.46	-1
Etoposide_AML_180min_r2_03_43_128	843.13	-142.82	-360.76
Etoposide_AML_180min_r2_08_49_102	815.19	0	-128.36
Etoposide_AML_180min_r2_08_49_126	815.19	-142.82	-185.76
Etoposide_AML_180min_r2_06_36_96	811.61	-142.82	-1
Etoposide_AML_180min_r2_06_36_69	811.61	-142.82	-4.39
Etoposide_AML_180min_r2_04_38_110	800.52	0	-1
Etoposide_AML_180min_r2_11_38_110	800.52	0	-1
Etoposide_AML_180min_r2_11_38_90	800.52	-142.82	-1
Etoposide_AML_180min_r2_04_38_90	800.52	-142.82	-1
Etoposide_AML_90min_r2_2_63_149	776.88	-142.82	-188.73
Etoposide_AML_90min_r2_2_63_183	776.88	-142.82	-345.77
Etoposide_AML_180min_r2_09_50_102	768.45	-142.82	-1
Etoposide_AML_180min_r2_09_50_132	768.45	-142.82	-155.79
Etoposide_AML_180min_r2_09_47_96	765.3	-428.46	-97.66
Etoposide_AML_180min_r2_09_47_125	765.3	-142.82	-325.94
Etoposide_AML_0min_r2_3_28_68	764.1	-142.82	-1
Etoposide_AML_0min_r2_3_28_81	764.1	-142.82	-159.09
Etoposide_AML_90min_r2_8_6_16	757.16	0	-66.38
Etoposide_AML_90min_r2_8_6_17	757.16	-285.64	-267.96
Etoposide_AML_90min_r2_3_58_132	749.72	0	-131.5
Etoposide_AML_90min_r2_3_58_150	749.72	-142.82	-277.35
Etoposide_AML_90min_r2_2_69_201	749.69	-142.82	-1
Etoposide_AML_90min_r2_2_69_164	749.69	-142.82	-221.99
Etoposide_AML_180min_r2_03_36_109	749.42	-142.82	-1
Etoposide_AML_180min_r2_03_36_81	749.42	0	-9.47
Etoposide_AML_90min_r2_6_66_148	724.85	-142.82	-29.26
Etoposide_AML_90min_r2_6_66_134	724.85	-142.82	-330.05
Etoposide_AML_90min_r2_6_73_149	721.43	0	-35.61
Etoposide_AML_90min_r2_6_73_164	721.43	428.46	247.17
Etoposide_AML_0min_r2_7_48_91	718.3	-142.82	-287.32
Etoposide_AML_0min_r2_7_48_142	718.3	-142.82	-185.14
Etoposide_AML_0min_r2_5_30_59	710.29	0	-74.28
Etoposide_AML_0min_r2_5_30_87	710.29	0	-1
Etoposide_AML_90min_r2_8_61_134	702.4	-142.82	-170.19
Etoposide_AML_90min_r2_8_61_131	702.4	-142.82	-1
Etoposide_AML_180min_r2_10_43_92	697.64	0	-296.15
Etoposide_AML_180min_r2_10_43_131	697.64	0	-244.48
Etoposide_AML_90min_r2_5_95_190	696.98	0	-1
Etoposide_AML_90min_r2_5_95_215	696.98	-142.82	-1
Etoposide_AML_90min_r2_7_97_210	677.35	-142.82	-126.96
Etoposide_AML_90min_r2_7_97_200	677.35	-142.82	-1
Etoposide_AML_90min_r2_5_43_101	663.45	0	-263.21
Etoposide_AML_90min_r2_5_43_85	663.45	-142.82	-29.19
Etoposide_AML_90min_r2_5_96_192	659.01	0	-1
Etoposide_AML_90min_r2_5_96_216	659.01	-142.82	-1
Etoposide_AML_90min_r2_4_54_118	652.34	0	-60.61
Etoposide_AML_90min_r2_4_54_126	652.34	-428.46	1
Etoposide_AML_0min_r2_4_90_278	647.06	-142.82	-339.58
Etoposide_AML_0min_r2_4_90_194	647.06	-142.82	-107.97
Etoposide_AML_180min_r2_09_12_32	639.73	0	-297.76
Etoposide_AML_180min_r2_09_12_29	639.73	0	-24.32
Etoposide_AML_90min_r2_4_86_190	637.15	-142.82	-101.19
Etoposide_AML_90min_r2_4_86_185	637.15	-142.82	-4.87
Etoposide_AML_90min_r2_4_86_189	636.02	-142.82	-144.26
Etoposide_AML_90min_r2_4_86_184	636.02	0	1
Etoposide_AML_90min_r2_2_72_172	626.14	0	-255.96
Etoposide_AML_90min_r2_2_72_208	626.14	0	-248.98
Etoposide_AML_0min_r2_7_95_186	624.82	-142.82	-343.75
Etoposide_AML_0min_r2_7_95_274	624.82	0	-243.93
Etoposide_AML_180min_r2_02_30_65	620.81	0	-231.68
Etoposide_AML_180min_r2_02_30_61	620.81	0	-88.63
Etoposide_AML_180min_r2_02_25_51	613.11	-142.82	-321.47
Etoposide_AML_180min_r2_02_25_55	613.11	-142.82	-203.69
Etoposide_AML_180min_r2_08_63_159	610.28	0	-262.18
Etoposide_AML_180min_r2_08_63_126	610.28	0	1
Etoposide_AML_90min_r2_7_46_110	606.98	-285.64	-34.35
Etoposide_AML_90min_r2_7_46_104	606.98	-142.82	-0.8
Etoposide_AML_0min_r2_6_71_149	604.81	-142.82	-348.71
Etoposide_AML_0min_r2_6_71_208	604.81	-142.82	-91.23
Etoposide_AML_0min_r2_5_10_30	600.64	-142.82	-323.13
Etoposide_AML_0min_r2_5_10_21	600.64	-142.82	-7.42
Etoposide_AML_0min_r2_8_79_167	599.02	-142.82	-335.03
Etoposide_AML_0min_r2_8_79_193	599.02	0	-167.2
Etoposide_AML_90min_r2_2_61_179	597.06	-142.82	-245.68
Etoposide_AML_90min_r2_2_61_143	597.06	0	-1
Etoposide_AML_90min_r2_1_37_100	596.3	-142.82	-223.34
Etoposide_AML_90min_r2_1_37_78	596.3	0	-8.77
Etoposide_AML_0min_r2_8_31_65	596.14	-142.82	-197.59
Etoposide_AML_0min_r2_8_31_76	596.14	0	1
Etoposide_AML_0min_r2_3_96_265	591.35	0	-165.29
Etoposide_AML_0min_r2_3_96_210	591.35	0	-88.27
Etoposide_AML_0min_r2_5_76_223	589.33	-142.82	-380.71
Etoposide_AML_0min_r2_5_76_152	589.33	0	-198.18
Etoposide_AML_0min_r2_2_14_39	588.78	-142.82	-1
Etoposide_AML_0min_r2_2_14_30	588.78	-142.82	-1
Etoposide_AML_90min_r2_1_63_131	583.04	0	-269.84
Etoposide_AML_90min_r2_1_63_161	583.04	-285.64	-195.62
Etoposide_AML_0min_r2_5_69_201	578.96	-142.82	-248.03
Etoposide_AML_0min_r2_5_69_136	578.96	0	-167.29
Etoposide_AML_90min_r2_7_69_157	572.99	0	-135.26
Etoposide_AML_90min_r2_7_69_153	572.99	0	-134.25
Etoposide_AML_90min_r2_2_35_88	569.64	0	-1
Etoposide_AML_90min_r2_2_35_108	569.64	0	1
Etoposide_AML_180min_r2_02_6_14	569.12	0	-214.59
Etoposide_AML_180min_r2_02_6_15	569.12	-142.82	-98.28
Etoposide_AML_0min_r2_8_72_176	569.11	0	-323.14
Etoposide_AML_0min_r2_8_72_150	569.11	-142.82	-165.47
Etoposide_AML_90min_r2_3_81_184	561.19	-142.82	-208.47
Etoposide_AML_90min_r2_3_81_209	561.19	-142.82	-33.08
Etoposide_AML_180min_r2_10_62_131	560.69	0	-221.25
Etoposide_AML_180min_r2_10_62_182	560.69	0	-8.73
Etoposide_AML_90min_r2_4_53_124	559.19	-142.82	-274.75
Etoposide_AML_90min_r2_4_53_117	559.19	0	-238.32
Etoposide_AML_90min_r2_9_7_19	557.64	-142.82	-249.46
Etoposide_AML_90min_r2_9_7_17	557.64	-142.82	-16.77
Etoposide_AML_90min_r2_8_65_142	555.64	0	-254.7
Etoposide_AML_90min_r2_8_65_138	555.64	0	-1
Etoposide_AML_180min_r2_07_47_121	554.03	-142.82	-18.11
Etoposide_AML_180min_r2_07_47_100	554.03	-142.82	-1
Etoposide_AML_0min_r2_7_0_0	548.16	-142.82	-251.94
Etoposide_AML_0min_r2_7_0_1	548.16	-142.82	-185.07
Etoposide_AML_90min_r2_9_71_157	547.63	0	-313.03
Etoposide_AML_90min_r2_9_71_165	547.63	0	-94.66
Etoposide_AML_180min_r2_08_25_66	545.22	-142.82	-139.74
Etoposide_AML_180min_r2_08_25_52	545.22	-142.82	-38.73
Etoposide_AML_90min_r2_6_72_161	539.97	0	-190.82
Etoposide_AML_90min_r2_6_72_147	539.97	-142.82	-97.39
Etoposide_AML_90min_r2_9_26_63	538.5	-142.82	-282
Etoposide_AML_90min_r2_9_26_68	538.5	-142.82	-216.2
Etoposide_AML_180min_r2_03_33_76	537.51	0	-289.27
Etoposide_AML_180min_r2_03_33_98	537.51	-142.82	-192.2
Etoposide_AML_90min_r2_8_49_107	536.68	-142.82	-302.25
Etoposide_AML_90min_r2_8_49_109	536.68	-142.82	-163.75
Etoposide_AML_180min_r2_10_6_20	533.55	0	-252.87
Etoposide_AML_180min_r2_10_6_15	533.55	-142.82	-111.26
Etoposide_AML_90min_r2_3_83_190	530.37	0	-340.21
Etoposide_AML_90min_r2_3_83_214	530.37	0	-64.4
Etoposide_AML_0min_r2_1_91_247	530.1	0	-1
Etoposide_AML_0min_r2_1_91_198	530.1	-142.82	-1
Etoposide_AML_90min_r2_2_65_190	529.85	-142.82	-310.43
Etoposide_AML_90min_r2_2_65_154	529.85	0	-25.97
Etoposide_AML_90min_r2_3_10_21	526.8	0	-218.72
Etoposide_AML_90min_r2_3_10_20	526.8	0	-2.71
Etoposide_AML_90min_r2_3_92_235	525.64	-142.82	-239.9
Etoposide_AML_90min_r2_3_92_207	525.64	-142.82	-122.53
Etoposide_AML_0min_r2_8_31_64	523.21	0	-280.47
Etoposide_AML_0min_r2_8_31_75	523.21	0	-51.29
Etoposide_AML_90min_r2_4_54_119	522.88	-142.82	-264.98
Etoposide_AML_90min_r2_4_54_127	522.88	-142.82	-174.98
Etoposide_AML_90min_r2_7_19_49	521.28	0	-76.83
Etoposide_AML_90min_r2_7_19_47	521.28	0	-18.98
Etoposide_AML_90min_r2_9_68_153	520.44	-142.82	-85.32
Etoposide_AML_90min_r2_9_68_160	520.44	-142.82	-1
Etoposide_AML_180min_r2_09_49_130	517.22	0	-187.86
Etoposide_AML_180min_r2_09_49_101	517.22	0	-38.54
Etoposide_AML_90min_r2_7_61_137	516.45	-285.64	-1.47
Etoposide_AML_90min_r2_7_61_142	516.45	428.46	383.41
Etoposide_AML_90min_r2_4_40_86	516.17	-142.82	-297.36
Etoposide_AML_90min_r2_4_40_93	516.17	0	-1
Etoposide_AML_90min_r2_6_22_41	515.97	-428.46	-294.87
Etoposide_AML_90min_r2_6_22_46	515.97	0	-92.9
Etoposide_AML_180min_r2_11_22_68	515.55	0	-257.66
Etoposide_AML_180min_r2_04_22_68	515.55	0	-257.66
Etoposide_AML_180min_r2_11_22_57	515.55	0	-62.19
Etoposide_AML_180min_r2_04_22_57	515.55	0	-62.19
Etoposide_AML_0min_r2_6_31_68	515.39	0	-1
Etoposide_AML_0min_r2_6_31_96	515.39	-142.82	-1
Etoposide_AML_0min_r2_3_90_250	515.16	0	-1
Etoposide_AML_0min_r2_3_90_194	515.16	0	-1
Etoposide_AML_0min_r2_1_68_153	513.86	0	-369.49
Etoposide_AML_0min_r2_1_68_193	513.86	-428.46	-219.98
Etoposide_AML_90min_r2_6_70_142	513.41	0	1
Etoposide_AML_90min_r2_6_70_157	513.41	428.46	18.43
Etoposide_AML_180min_r2_06_13_26	508.07	0	-172.24
Etoposide_AML_180min_r2_06_13_39	508.07	-142.82	-7.58
Etoposide_AML_180min_r2_06_44_120	507.09	-142.82	-265.99
Etoposide_AML_180min_r2_06_44_84	507.09	-142.82	-184.03
Etoposide_AML_0min_r2_2_55_151	505.59	0	-337.59
Etoposide_AML_0min_r2_2_55_110	505.59	0	-1.78
Etoposide_AML_0min_r2_2_80_159	503.27	0	-384.11
Etoposide_AML_0min_r2_2_80_212	503.27	0	-81.17
Etoposide_AML_0min_r2_7_64_123	500.5	-142.82	-28.1
Etoposide_AML_0min_r2_7_64_193	500.5	0	-1
Etoposide_AML_0min_r2_6_66_137	499.43	-142.82	-344.93
Etoposide_AML_0min_r2_6_66_196	499.43	0	-142.48
Etoposide_AML_0min_r2_3_20_46	499.29	-142.82	-1
Etoposide_AML_0min_r2_3_20_53	499.29	-428.46	-1
Etoposide_AML_0min_r2_8_93_217	499.26	-142.82	-232.82
Etoposide_AML_0min_r2_8_93_192	499.26	-142.82	-227.26
Etoposide_AML_90min_r2_4_18_33	499.22	-142.82	-165.67
Etoposide_AML_90min_r2_4_18_41	499.22	-142.82	-37.26
Etoposide_AML_90min_r2_5_40_92	494.87	0	-349.57
Etoposide_AML_90min_r2_5_40_80	494.87	-142.82	-299.26
Etoposide_AML_90min_r2_4_80_172	493.59	-142.82	-10.08
Etoposide_AML_90min_r2_4_80_177	493.59	0	1
Etoposide_AML_90min_r2_3_79_205	492.72	-142.82	-1
Etoposide_AML_90min_r2_3_79_180	492.72	-142.82	-1
Etoposide_AML_90min_r2_8_44_96	491.51	-142.82	-308.51
Etoposide_AML_90min_r2_8_44_100	491.51	-142.82	-80.71
Etoposide_AML_90min_r2_5_71_143	489.59	0	-252.85
Etoposide_AML_90min_r2_5_71_165	489.59	0	-180.36
Etoposide_AML_90min_r2_5_47_94	486.41	-142.82	-247.98
Etoposide_AML_90min_r2_5_47_112	486.41	-142.82	-237.28
Etoposide_AML_0min_r2_2_9_24	484.74	-428.46	-277.67
Etoposide_AML_0min_r2_2_9_20	484.74	-428.46	1
Etoposide_AML_90min_r2_7_88_186	483.92	-142.82	-254.43
Etoposide_AML_90min_r2_7_88_192	483.92	-142.82	-90.6
Etoposide_AML_0min_r2_2_72_144	483.66	-142.82	-346.77
Etoposide_AML_0min_r2_2_72_196	483.66	-142.82	-293.05
Etoposide_AML_90min_r2_1_53_136	482.11	-142.82	-203.34
Etoposide_AML_90min_r2_1_53_108	482.11	-142.82	-105.67
Etoposide_AML_0min_r2_6_53_157	481.56	-142.82	-324.06
Etoposide_AML_0min_r2_6_53_108	481.56	-142.82	-171.02
Etoposide_AML_180min_r2_07_67_140	479.72	0	-1
Etoposide_AML_180min_r2_07_67_163	479.72	-142.82	-1
Etoposide_AML_90min_r2_5_19_46	478.24	0	-284.4
Etoposide_AML_90min_r2_5_19_41	478.24	0	-23.51
Etoposide_AML_180min_r2_05_27_67	478.14	0	-322.34
Etoposide_AML_180min_r2_05_27_52	478.14	-428.46	-204.24
Etoposide_AML_0min_r2_4_64_201	477.98	-142.82	-253.65
Etoposide_AML_0min_r2_4_64_141	477.98	-142.82	-90.74
Etoposide_AML_90min_r2_9_33_85	476.84	0	-330.98
Etoposide_AML_90min_r2_9_33_82	476.84	0	-72.63
Etoposide_AML_0min_r2_1_63_176	476.24	-142.82	-239.61
Etoposide_AML_0min_r2_1_63_142	476.24	-142.82	-220.26
Etoposide_AML_90min_r2_9_28_72	474.85	-142.82	-167.49
Etoposide_AML_90min_r2_9_28_68	474.85	0	-35.81
Etoposide_AML_0min_r2_1_42_116	474.55	-142.82	-129.04
Etoposide_AML_0min_r2_1_42_97	474.55	-142.82	-1
Etoposide_AML_180min_r2_08_40_81	473.79	0	-315.37
Etoposide_AML_180min_r2_08_40_104	473.79	0	-168.75
Etoposide_AML_90min_r2_7_96_208	470.67	0	-291.2
Etoposide_AML_90min_r2_7_96_198	470.67	0	-40.03
Etoposide_AML_90min_r2_8_15_36	467.12	0	-1
Etoposide_AML_90min_r2_8_15_35	467.12	0	1
Etoposide_AML_0min_r2_2_40_81	466.04	-142.82	-240.37
Etoposide_AML_0min_r2_2_40_112	466.04	-142.82	-158.72
Etoposide_AML_0min_r2_4_81_250	465.37	-142.82	-1
Etoposide_AML_0min_r2_4_81_177	465.37	-142.82	-1
Etoposide_AML_0min_r2_7_28_85	465.31	0	-176.19
Etoposide_AML_0min_r2_7_28_54	465.31	-142.82	-174.91
Etoposide_AML_0min_r2_6_57_167	460.14	0	-333.19
Etoposide_AML_0min_r2_6_57_116	460.14	-142.82	-77.29
Etoposide_AML_90min_r2_7_42_100	459.44	-142.82	-140.07
Etoposide_AML_90min_r2_7_42_93	459.44	-142.82	-42.76
Etoposide_AML_90min_r2_1_74_191	459.4	0	-1
Etoposide_AML_90min_r2_1_74_156	459.4	-142.82	-1
Etoposide_AML_180min_r2_06_50_136	458.77	0	-346.62
Etoposide_AML_180min_r2_06_50_99	458.77	0	-90.34
Etoposide_AML_90min_r2_8_66_139	457.21	0	-61.41
Etoposide_AML_90min_r2_8_66_143	457.21	0	-47.77
Etoposide_AML_90min_r2_9_79_176	456.6	0	-324.94
Etoposide_AML_90min_r2_9_79_182	456.6	-142.82	-154.19
Etoposide_AML_0min_r2_3_11_31	456.54	-142.82	-274.47
Etoposide_AML_0min_r2_3_11_29	456.54	-142.82	-15.94
Etoposide_AML_180min_r2_02_6_16	454.02	0	1
Etoposide_AML_180min_r2_02_6_15	454.02	-285.64	1
Etoposide_AML_180min_r2_04_2_8	452.45	0	-78.99
Etoposide_AML_180min_r2_11_2_8	452.45	0	-78.99
Etoposide_AML_180min_r2_04_2_12	452.45	-142.82	-39.85
Etoposide_AML_180min_r2_11_2_12	452.45	-142.82	-39.85
Etoposide_AML_90min_r2_3_36_81	450.28	0	-341.03
Etoposide_AML_90min_r2_3_36_92	450.28	0	-323.15
Etoposide_AML_90min_r2_5_32_76	448.38	-142.82	-291.54
Etoposide_AML_90min_r2_5_32_66	448.38	-142.82	-267.97
Etoposide_AML_90min_r2_6_15_29	447.65	0	-194.41
Etoposide_AML_90min_r2_6_15_31	447.65	0	-113.57
Etoposide_AML_90min_r2_5_95_214	444.68	0	-300.05
Etoposide_AML_90min_r2_5_95_191	444.68	0	-295.97
Etoposide_AML_0min_r2_1_88_193	444.53	-142.82	-350.87
Etoposide_AML_0min_r2_1_88_241	444.53	0	-63.77
Etoposide_AML_90min_r2_7_2_5	444.38	0	-331.06
Etoposide_AML_90min_r2_7_2_5	444.38	0	-5.07
Etoposide_AML_180min_r2_09_69_138	443.46	-142.82	-173.83
Etoposide_AML_180min_r2_09_69_174	443.46	-142.82	-132.41
Etoposide_AML_0min_r2_6_68_199	443.33	-142.82	-356.74
Etoposide_AML_0min_r2_6_68_141	443.33	-142.82	-79.8
Etoposide_AML_180min_r2_04_60_133	442.62	-142.82	-39.73
Etoposide_AML_180min_r2_11_60_133	442.62	-142.82	-39.73
Etoposide_AML_180min_r2_11_60_162	442.62	-142.82	1
Etoposide_AML_180min_r2_04_60_162	442.62	-142.82	1
Etoposide_AML_90min_r2_7_38_92	442.58	-142.82	-303.53
Etoposide_AML_90min_r2_7_38_86	442.58	-142.82	-224.37
Etoposide_AML_180min_r2_02_21_47	437.1	0	-269.32
Etoposide_AML_180min_r2_02_21_44	437.1	-142.82	-96.78
Etoposide_AML_0min_r2_2_73_147	436.51	-142.82	-278.38
Etoposide_AML_0min_r2_2_73_198	436.51	0	-152.33
Etoposide_AML_0min_r2_6_43_132	436.29	-142.82	-1
Etoposide_AML_0min_r2_6_43_91	436.29	-142.82	-1
Etoposide_AML_0min_r2_5_46_135	435.64	0	-222.9
Etoposide_AML_0min_r2_5_46_94	435.64	-142.82	-201.97
Etoposide_AML_180min_r2_02_0_1	435.48	-142.82	-101.44
Etoposide_AML_180min_r2_02_0_0	435.48	-142.82	-75.62
Etoposide_AML_90min_r2_7_82_176	434.51	428.46	-1
Etoposide_AML_90min_r2_7_82_182	434.51	285.64	-1
Etoposide_AML_0min_r2_4_59_134	433.87	-142.82	-354.02
Etoposide_AML_0min_r2_4_59_191	433.87	-142.82	-335.3
Etoposide_AML_180min_r2_06_54_107	433.58	0	-234.5
Etoposide_AML_180min_r2_06_54_144	433.58	-142.82	-93.76
Etoposide_AML_0min_r2_3_49_108	432.66	-142.82	-334.34
Etoposide_AML_0min_r2_3_49_135	432.66	0	-297.48
Etoposide_AML_0min_r2_2_63_129	432.63	0	-1
Etoposide_AML_0min_r2_2_63_175	432.63	-142.82	-1
Etoposide_AML_90min_r2_9_47_117	432.36	0	-336.01
Etoposide_AML_90min_r2_9_47_117	432.36	-142.82	-1.42
Etoposide_AML_90min_r2_4_73_162	432.12	0	-289.92
Etoposide_AML_90min_r2_4_73_155	432.12	0	-173.95
Etoposide_AML_180min_r2_06_21_60	431.14	-142.82	-342.68
Etoposide_AML_180min_r2_06_21_42	431.14	0	-42.15
Etoposide_AML_90min_r2_3_98_218	431.04	0	-125.28
Etoposide_AML_90min_r2_3_98_246	431.04	0	-1
Etoposide_AML_90min_r2_6_70_143	430.96	-142.82	-259.23
Etoposide_AML_90min_r2_6_70_156	430.96	0	-149.74
Etoposide_AML_0min_r2_8_71_149	430.92	-142.82	-256.95
Etoposide_AML_0min_r2_8_71_174	430.92	-142.82	-253.34
Etoposide_AML_90min_r2_4_25_56	430.83	-142.82	-219.58
Etoposide_AML_90min_r2_4_25_49	430.83	-142.82	-160.03
Etoposide_AML_180min_r2_05_70_168	430.7	-142.82	-301.27
Etoposide_AML_180min_r2_05_70_134	430.7	-142.82	-5.35
Etoposide_AML_90min_r2_8_71_151	430.57	0	-127.35
Etoposide_AML_90min_r2_8_71_151	430.57	-142.82	-75.15
Etoposide_AML_90min_r2_4_39_90	429.86	-142.82	-241.52
Etoposide_AML_90min_r2_4_39_84	429.86	0	-65.56
Etoposide_AML_90min_r2_5_87_196	429.82	0	-302.41
Etoposide_AML_90min_r2_5_87_174	429.82	-142.82	-108.84
Etoposide_AML_90min_r2_8_31_73	429.23	0	-154.44
Etoposide_AML_90min_r2_8_31_71	429.23	0	-39.23
Etoposide_AML_90min_r2_8_4_12	427.03	-142.82	-141.65
Etoposide_AML_90min_r2_8_4_12	427.03	-142.82	-128.19
Etoposide_AML_90min_r2_3_95_213	426.19	0	-291.95
Etoposide_AML_90min_r2_3_95_240	426.19	0	-277.52
Etoposide_AML_180min_r2_07_17_46	426.03	0	-4.56
Etoposide_AML_180min_r2_07_17_39	426.03	0	1
Etoposide_AML_90min_r2_4_39_83	425.48	0	-245.6
Etoposide_AML_90min_r2_4_39_91	425.48	0	-120.87
Etoposide_AML_90min_r2_6_59_136	423.33	-142.82	-263.85
Etoposide_AML_90min_r2_6_59_121	423.33	0	-121.6
Etoposide_AML_90min_r2_8_96_201	422.53	-142.82	-1
Etoposide_AML_90min_r2_8_96_201	422.53	-142.82	-1
Etoposide_AML_90min_r2_5_81_184	422.19	-428.46	1
Etoposide_AML_90min_r2_5_81_164	422.19	-428.46	1
Etoposide_AML_90min_r2_6_66_135	420.1	0	-326.31
Etoposide_AML_90min_r2_6_66_149	420.1	-428.46	-74.41
Etoposide_AML_180min_r2_08_51_131	419.09	0	-331.15
Etoposide_AML_180min_r2_08_51_106	419.09	-142.82	-73.17
Etoposide_AML_90min_r2_1_85_216	417.36	0	-1
Etoposide_AML_90min_r2_1_85_179	417.36	0	-1
Etoposide_AML_90min_r2_6_6_11	417.28	-142.82	-245.82
Etoposide_AML_90min_r2_6_6_14	417.28	0	-108.66
Etoposide_AML_90min_r2_5_77_156	417.05	0	-313.06
Etoposide_AML_90min_r2_5_77_175	417.05	0	-78.97
Etoposide_AML_90min_r2_9_63_150	416.52	-142.82	-329.83
Etoposide_AML_90min_r2_9_63_146	416.52	0	-77.04
Etoposide_AML_180min_r2_04_15_49	416.14	0	-239.88
Etoposide_AML_180min_r2_11_15_49	416.14	0	-239.88
Etoposide_AML_180min_r2_04_15_41	416.14	0	-68.31
Etoposide_AML_180min_r2_11_15_41	416.14	0	-68.31
Etoposide_AML_90min_r2_3_18_37	416.01	-142.82	-347.25
Etoposide_AML_90min_r2_3_18_43	416.01	-142.82	-71.11
Etoposide_AML_90min_r2_5_34_79	415.92	0	-1
Etoposide_AML_90min_r2_5_34_68	415.92	-142.82	-1
Etoposide_AML_180min_r2_06_52_141	414.33	0	-274.22
Etoposide_AML_180min_r2_06_52_104	414.33	0	-65.25
Etoposide_AML_0min_r2_8_44_106	413.27	-142.82	-147.39
Etoposide_AML_0min_r2_8_44_90	413.27	-142.82	-45.24
Etoposide_AML_180min_r2_11_40_95	412.38	0	-293.26
Etoposide_AML_180min_r2_04_40_95	412.38	0	-293.26
Etoposide_AML_180min_r2_11_40_113	412.38	0	-110.9
Etoposide_AML_180min_r2_04_40_113	412.38	0	-110.9
Etoposide_AML_180min_r2_03_29_90	410.44	-142.82	-345.74
Etoposide_AML_180min_r2_03_29_70	410.44	-142.82	-18.32
Etoposide_AML_90min_r2_3_11_24	410.39	-142.82	-279.11
Etoposide_AML_90min_r2_3_11_22	410.39	-142.82	-64.41
Etoposide_AML_90min_r2_9_42_105	409.08	-142.82	-238.49
Etoposide_AML_90min_r2_9_42_103	409.08	0	-83.42
Etoposide_AML_180min_r2_04_67_171	406.9	-142.82	-201.5
Etoposide_AML_180min_r2_11_67_171	406.9	-142.82	-201.5
Etoposide_AML_180min_r2_11_67_143	406.9	-142.82	-190.66
Etoposide_AML_180min_r2_04_67_143	406.9	-142.82	-190.66
Etoposide_AML_0min_r2_8_82_172	406.7	0	-255.56
Etoposide_AML_0min_r2_8_82_197	406.7	0	-79.15
Etoposide_AML_90min_r2_9_39_95	405.96	-142.82	-231.48
Etoposide_AML_90min_r2_9_39_98	405.96	-142.82	-226.71
Etoposide_AML_180min_r2_08_42_87	405.28	-142.82	-4.25
Etoposide_AML_180min_r2_08_42_109	405.28	0	1
Etoposide_AML_180min_r2_07_65_160	404.89	-142.82	-1
Etoposide_AML_180min_r2_07_65_133	404.89	-142.82	-1
Etoposide_AML_90min_r2_3_79_204	402.75	-142.82	-111.4
Etoposide_AML_90min_r2_3_79_181	402.75	0	-1
Etoposide_AML_90min_r2_9_90_199	402.7	-142.82	-140.36
Etoposide_AML_90min_r2_9_90_202	402.7	-142.82	-113.57
Etoposide_AML_0min_r2_4_70_221	401.57	0	-354.47
Etoposide_AML_0min_r2_4_70_154	401.57	0	-260.16
Etoposide_AML_180min_r2_06_13_40	399.97	0	-331.42
Etoposide_AML_180min_r2_06_13_27	399.97	-142.82	-178.97
Etoposide_AML_90min_r2_6_98_218	399.8	-142.82	-274.03
Etoposide_AML_90min_r2_6_98_202	399.8	-142.82	-117.26
Etoposide_AML_0min_r2_3_67_143	399.62	-142.82	-343.76
Etoposide_AML_0min_r2_3_67_181	399.62	-142.82	-44.16
Etoposide_AML_0min_r2_8_41_97	398.91	0	-261.04
Etoposide_AML_0min_r2_8_41_85	398.91	-142.82	-28.26
Etoposide_AML_90min_r2_9_73_161	398.34	0	-333.82
Etoposide_AML_90min_r2_9_73_170	398.34	0	-218.24
Etoposide_AML_90min_r2_6_50_101	396.75	0	-275.68
Etoposide_AML_90min_r2_6_50_115	396.75	0	-72.64
Etoposide_AML_0min_r2_1_46_104	396.34	0	-357.06
Etoposide_AML_0min_r2_1_46_128	396.34	-142.82	-34.42
Etoposide_AML_0min_r2_2_73_197	396.22	0	-358.85
Etoposide_AML_0min_r2_2_73_146	396.22	0	-1
Etoposide_AML_90min_r2_6_48_110	395.04	0	-273.86
Etoposide_AML_90min_r2_6_48_97	395.04	-428.46	-83.17
Etoposide_AML_0min_r2_8_38_79	394.91	0	-335.85
Etoposide_AML_0min_r2_8_38_92	394.91	0	-177.43
Etoposide_AML_90min_r2_6_33_63	394.56	-142.82	-292.2
Etoposide_AML_90min_r2_6_33_74	394.56	0	-271.17
Etoposide_AML_90min_r2_6_9_19	393.84	-142.82	-1
Etoposide_AML_90min_r2_6_9_17	393.84	-142.82	-1
Etoposide_AML_180min_r2_11_38_109	392.27	0	-329.52
Etoposide_AML_180min_r2_04_38_109	392.27	0	-329.52
Etoposide_AML_180min_r2_11_38_91	392.27	-142.82	-11.79
Etoposide_AML_180min_r2_04_38_91	392.27	-142.82	-11.79
Etoposide_AML_180min_r2_08_27_72	391.48	0	-224.01
Etoposide_AML_180min_r2_08_27_55	391.48	0	-1
Etoposide_AML_90min_r2_8_77_164	391.47	-142.82	-79.93
Etoposide_AML_90min_r2_8_77_163	391.47	0	1
Etoposide_AML_90min_r2_5_80_161	390.85	-428.46	-349.28
Etoposide_AML_90min_r2_5_80_181	390.85	0	-320.19
Etoposide_AML_0min_r2_4_79_172	390.73	0	-72.97
Etoposide_AML_0min_r2_4_79_245	390.73	0	1
Etoposide_AML_0min_r2_8_35_85	389.8	-142.82	-310.12
Etoposide_AML_0min_r2_8_35_74	389.8	-142.82	-95.67
Etoposide_AML_90min_r2_9_26_69	389.55	-142.82	-1
Etoposide_AML_90min_r2_9_26_64	389.55	-142.82	-1
Etoposide_AML_90min_r2_6_63_142	389.51	428.46	-1
Etoposide_AML_90min_r2_6_63_129	389.51	0	1
Etoposide_AML_0min_r2_3_55_120	388.83	-142.82	-163.86
Etoposide_AML_0min_r2_3_55_152	388.83	0	-97.43
Etoposide_AML_180min_r2_04_28_71	388.33	0	-1
Etoposide_AML_180min_r2_11_28_71	388.33	0	-1
Etoposide_AML_180min_r2_04_28_83	388.33	-142.82	-1
Etoposide_AML_180min_r2_11_28_83	388.33	-142.82	-1
Etoposide_AML_90min_r2_7_84_185	387.36	0	-262.83
Etoposide_AML_90min_r2_7_84_179	387.36	-142.82	-110.68
Etoposide_AML_0min_r2_6_73_213	387.27	0	-326.77
Etoposide_AML_0min_r2_6_73_154	387.27	0	-317.01
Etoposide_AML_90min_r2_3_29_60	386.88	428.46	31.88
Etoposide_AML_90min_r2_3_29_71	386.88	285.64	203.71
Etoposide_AML_90min_r2_8_14_34	386.66	428.46	-1
Etoposide_AML_90min_r2_8_14_34	386.66	428.46	-1
Etoposide_AML_90min_r2_9_79_175	386.48	-142.82	-337.45
Etoposide_AML_90min_r2_9_79_181	386.48	0	-7.56
Etoposide_AML_180min_r2_02_8_19	386.44	-142.82	-234.48
Etoposide_AML_180min_r2_02_8_18	386.44	-142.82	-151.13
Etoposide_AML_90min_r2_3_35_90	385.61	-142.82	-221.66
Etoposide_AML_90min_r2_3_35_80	385.61	-142.82	-17.24
Etoposide_AML_180min_r2_06_38_102	385.32	-142.82	-276.02
Etoposide_AML_180min_r2_06_38_72	385.32	-142.82	-100.57
Etoposide_AML_90min_r2_7_43_96	384.55	-142.82	-210.06
Etoposide_AML_90min_r2_7_43_101	384.55	-142.82	-18.52
Etoposide_AML_0min_r2_1_93_250	384.12	0	-145.69
Etoposide_AML_0min_r2_1_93_202	384.12	0	-77.06
Etoposide_AML_90min_r2_1_15_36	384	-142.82	-243.31
Etoposide_AML_90min_r2_1_15_29	384	-142.82	-23.06
Etoposide_AML_0min_r2_8_36_87	383.84	0	-321.65
Etoposide_AML_0min_r2_8_36_75	383.84	-142.82	-44.32
Etoposide_AML_180min_r2_02_40_95	383.18	-142.82	-296.29
Etoposide_AML_180min_r2_02_40_93	383.18	-142.82	-110.68
Etoposide_AML_90min_r2_6_8_16	381.87	-142.82	-199.4
Etoposide_AML_90min_r2_6_8_17	381.87	-142.82	-169.86
Etoposide_AML_180min_r2_08_53_137	381.53	-142.82	-261.62
Etoposide_AML_180min_r2_08_53_110	381.53	-142.82	-243.11
Etoposide_AML_90min_r2_6_74_151	379.74	0	-78.14
Etoposide_AML_90min_r2_6_74_165	379.74	0	-5.34
Etoposide_AML_90min_r2_7_54_121	378.84	-142.82	-119.05
Etoposide_AML_90min_r2_7_54_124	378.84	0	-104.69
Etoposide_AML_0min_r2_8_84_175	378.75	0	-14.03
Etoposide_AML_0min_r2_8_84_201	378.75	0	-10.62
Etoposide_AML_90min_r2_5_9_21	378.21	0	-301.62
Etoposide_AML_90min_r2_5_9_19	378.21	0	-49.1
Etoposide_AML_0min_r2_5_27_78	377.72	-142.82	-315.31
Etoposide_AML_0min_r2_5_27_53	377.72	-142.82	-39.57
Etoposide_AML_0min_r2_3_20_47	377.31	-142.82	-224.51
Etoposide_AML_0min_r2_3_20_54	377.31	-142.82	-114.15
Etoposide_AML_0min_r2_6_91_189	376.32	-142.82	-157.49
Etoposide_AML_0min_r2_6_91_261	376.32	-142.82	-145.55
Etoposide_AML_90min_r2_6_28_60	376.11	0	-1
Etoposide_AML_90min_r2_6_28_52	376.11	-142.82	-1
Etoposide_AML_0min_r2_6_91_188	376	-142.82	-169.22
Etoposide_AML_0min_r2_6_91_262	376	0	-163.01
Etoposide_AML_0min_r2_1_17_41	375.93	-142.82	-350.66
Etoposide_AML_0min_r2_1_17_46	375.93	-142.82	-137.77
Etoposide_AML_90min_r2_4_19_36	374.44	-142.82	-331.48
Etoposide_AML_90min_r2_4_19_42	374.44	-142.82	-325.21
Etoposide_AML_90min_r2_6_17_35	373.65	0	-317.71
Etoposide_AML_90min_r2_6_17_31	373.65	0	-116.34
Etoposide_AML_90min_r2_1_84_176	373.39	-142.82	-361.53
Etoposide_AML_90min_r2_1_84_213	373.39	-142.82	-92.45
Etoposide_AML_0min_r2_2_57_113	372.98	-142.82	-373
Etoposide_AML_0min_r2_2_57_155	372.98	0	-1
Etoposide_AML_90min_r2_7_96_207	371.6	0	-86.34
Etoposide_AML_90min_r2_7_96_199	371.6	0	-79.66
Etoposide_AML_90min_r2_5_5_13	371.29	-142.82	-1
Etoposide_AML_90min_r2_5_5_9	371.29	-142.82	-1
Etoposide_AML_0min_r2_7_63_122	370.69	0	-379.23
Etoposide_AML_0min_r2_7_63_191	370.69	0	1
Etoposide_AML_90min_r2_8_11_28	370.58	0	-173.02
Etoposide_AML_90min_r2_8_11_27	370.58	0	1
Etoposide_AML_180min_r2_09_27_73	370.2	-142.82	-280.78
Etoposide_AML_180min_r2_09_27_58	370.2	0	-128.52
Etoposide_AML_180min_r2_04_21_67	370.15	0	-43.05
Etoposide_AML_180min_r2_11_21_67	370.15	0	-43.05
Etoposide_AML_180min_r2_11_21_55	370.15	0	-40.63
Etoposide_AML_180min_r2_04_21_55	370.15	0	-40.63
Etoposide_AML_180min_r2_07_82_149	369.87	0	-1
Etoposide_AML_180min_r2_07_82_172	369.87	-142.82	-1
Etoposide_AML_90min_r2_5_72_166	369.5	0	-326.76
Etoposide_AML_90min_r2_5_72_145	369.5	0	-162.63
Etoposide_AML_90min_r2_8_27_63	369.25	-142.82	-213.09
Etoposide_AML_90min_r2_8_27_65	369.25	-142.82	-170.37
Etoposide_AML_90min_r2_6_65_146	368.66	0	-205.44
Etoposide_AML_90min_r2_6_65_132	368.66	0	-154.15
Etoposide_AML_90min_r2_7_98_211	368.33	0	-1
Etoposide_AML_90min_r2_7_98_203	368.33	0	-1
Etoposide_AML_0min_r2_1_89_195	368.05	0	-14.07
Etoposide_AML_0min_r2_1_89_243	368.05	0	-1
Etoposide_AML_90min_r2_9_45_113	367.73	0	-90.25
Etoposide_AML_90min_r2_9_45_113	367.73	-142.82	-85.56
Etoposide_AML_90min_r2_5_23_48	366.68	0	-293.58
Etoposide_AML_90min_r2_5_23_54	366.68	0	-65.98
Etoposide_AML_0min_r2_8_44_91	366.57	0	-345.67
Etoposide_AML_0min_r2_8_44_107	366.57	0	-197.41
Etoposide_AML_180min_r2_04_25_63	365.51	-142.82	-244.8
Etoposide_AML_180min_r2_11_25_63	365.51	-142.82	-244.8
Etoposide_AML_180min_r2_04_25_74	365.51	0	-81.2
Etoposide_AML_180min_r2_11_25_74	365.51	0	-81.2
Etoposide_AML_90min_r2_1_79_202	364.68	0	-157.41
Etoposide_AML_90min_r2_1_79_167	364.68	0	1
Etoposide_AML_180min_r2_06_30_59	364.65	0	-289.74
Etoposide_AML_180min_r2_06_30_84	364.65	-142.82	-31.77
Etoposide_AML_90min_r2_8_44_97	364.45	-142.82	-247.62
Etoposide_AML_90min_r2_8_44_99	364.45	0	-95.79
Etoposide_AML_0min_r2_6_89_257	363.95	0	-290.69
Etoposide_AML_0min_r2_6_89_186	363.95	0	-1
Etoposide_AML_90min_r2_8_67_145	363.83	-142.82	-231.78
Etoposide_AML_90min_r2_8_67_141	363.83	-142.82	-149.66
Etoposide_AML_180min_r2_03_33_99	363.39	-142.82	-263.59
Etoposide_AML_180min_r2_03_33_75	363.39	0	-23.52
Etoposide_AML_180min_r2_08_19_40	361.89	0	-198.93
Etoposide_AML_180min_r2_08_19_52	361.89	0	-167.25
Etoposide_AML_90min_r2_7_49_115	359.58	-142.82	-309.27
Etoposide_AML_90min_r2_7_49_110	359.58	-142.82	-1
Etoposide_AML_0min_r2_8_65_137	359.31	-142.82	-218.29
Etoposide_AML_0min_r2_8_65_160	359.31	0	-71.54
Etoposide_AML_180min_r2_09_3_7	359.09	-142.82	-184.67
Etoposide_AML_180min_r2_09_3_10	359.09	0	-110.32
Etoposide_AML_90min_r2_7_84_180	358.76	-142.82	-345.23
Etoposide_AML_90min_r2_7_84_186	358.76	-142.82	-16.71
Etoposide_AML_90min_r2_6_76_154	358.59	-142.82	-172.52
Etoposide_AML_90min_r2_6_76_168	358.59	0	-37.26
Etoposide_AML_0min_r2_5_39_114	358.27	-142.82	-185.41
Etoposide_AML_0min_r2_5_39_78	358.27	0	-107.11
Etoposide_AML_90min_r2_2_56_166	357.66	-142.82	-111.92
Etoposide_AML_90min_r2_2_56_132	357.66	0	1
Etoposide_AML_180min_r2_02_43_89	357.49	0	-199.28
Etoposide_AML_180min_r2_02_43_88	357.49	-142.82	-1
Etoposide_AML_90min_r2_7_72_164	357.22	0	-172.62
Etoposide_AML_90min_r2_7_72_158	357.22	0	-1
Etoposide_AML_90min_r2_8_56_124	356.29	0	-253.78
Etoposide_AML_90min_r2_8_56_121	356.29	0	-61.18
Etoposide_AML_90min_r2_6_85_187	354.25	-428.46	-281.38
Etoposide_AML_90min_r2_6_85_173	354.25	0	-63.2
Etoposide_AML_90min_r2_6_58_134	354.18	0	-63.69
Etoposide_AML_90min_r2_6_58_118	354.18	-428.46	-62.11
Etoposide_AML_90min_r2_8_21_52	353.21	-142.82	-325.45
Etoposide_AML_90min_r2_8_21_52	353.21	-142.82	-5.45
Etoposide_AML_90min_r2_9_98_218	353.14	0	-352.84
Etoposide_AML_90min_r2_9_98_215	353.14	0	-79.2
Etoposide_AML_0min_r2_8_74_181	352.79	-142.82	-314.38
Etoposide_AML_0min_r2_8_74_154	352.79	0	1
Etoposide_AML_0min_r2_3_35_96	352.76	0	-304.07
Etoposide_AML_0min_r2_3_35_81	352.76	0	-66.67
Etoposide_AML_90min_r2_9_81_185	352.54	0	-336.09
Etoposide_AML_90min_r2_9_81_178	352.54	0	-155.21
Etoposide_AML_90min_r2_7_90_197	352.28	-142.82	-289.34
Etoposide_AML_90min_r2_7_90_191	352.28	0	-263.56
Etoposide_AML_90min_r2_1_49_127	352.06	0	-1
Etoposide_AML_90min_r2_1_49_101	352.06	0	-1
Etoposide_AML_90min_r2_6_55_127	351.8	0	-339.44
Etoposide_AML_90min_r2_6_55_113	351.8	428.46	427.28
Etoposide_AML_90min_r2_9_43_106	351.11	-142.82	-306.64
Etoposide_AML_90min_r2_9_43_105	351.11	0	-271.37
Etoposide_AML_90min_r2_6_69_155	349.98	-142.82	-230.11
Etoposide_AML_90min_r2_6_69_141	349.98	-142.82	-225.05
Etoposide_AML_0min_r2_8_82_198	349.85	-142.82	-209.96
Etoposide_AML_0min_r2_8_82_171	349.85	-142.82	-78.81
Etoposide_AML_90min_r2_9_90_200	349.22	0	-268.37
Etoposide_AML_90min_r2_9_90_203	349.22	0	-114.96
Etoposide_AML_180min_r2_02_41_84	348.91	0	-342.7
Etoposide_AML_180min_r2_02_41_87	348.91	0	-38.77
Etoposide_AML_90min_r2_1_47_119	348.77	-142.82	-159.47
Etoposide_AML_90min_r2_1_47_94	348.77	-142.82	-153.76
Etoposide_AML_180min_r2_02_20_46	348.69	0	-259.91
Etoposide_AML_180min_r2_02_20_42	348.69	0	-249.51
Etoposide_AML_0min_r2_3_56_123	348.11	-142.82	-118.26
Etoposide_AML_0min_r2_3_56_154	348.11	-142.82	-50.72
Etoposide_AML_0min_r2_1_74_207	347.68	0	-172.39
Etoposide_AML_0min_r2_1_74_163	347.68	-142.82	-88.14
Etoposide_AML_180min_r2_08_63_127	347.68	0	-66.02
Etoposide_AML_180min_r2_08_63_158	347.68	0	-1
Etoposide_AML_0min_r2_3_4_12	347.22	-142.82	-354.1
Etoposide_AML_0min_r2_3_4_9	347.22	-142.82	-91.83
Etoposide_AML_180min_r2_04_60_134	346.87	-142.82	-303.1
Etoposide_AML_180min_r2_11_60_134	346.87	-142.82	-303.1
Etoposide_AML_180min_r2_11_60_163	346.87	0	-191.35
Etoposide_AML_180min_r2_04_60_163	346.87	0	-191.35
Etoposide_AML_0min_r2_4_52_119	346.79	-142.82	-137.08
Etoposide_AML_0min_r2_4_52_171	346.79	0	-75.98
Etoposide_AML_90min_r2_3_33_75	346.32	-142.82	-206.99
Etoposide_AML_90min_r2_3_33_87	346.32	-142.82	-86.51
Etoposide_AML_90min_r2_8_64_139	345.78	0	-163.23
Etoposide_AML_90min_r2_8_64_136	345.78	0	-64.58
Etoposide_AML_90min_r2_7_65_146	345.62	0	-94.65
Etoposide_AML_90min_r2_7_65_150	345.62	0	-29.76
Etoposide_AML_90min_r2_8_29_68	345.36	-142.82	-1
Etoposide_AML_90min_r2_8_29_70	345.36	-142.82	-1
Etoposide_AML_0min_r2_8_65_159	345.25	-142.82	-321.19
Etoposide_AML_0min_r2_8_65_136	345.25	0	-167.87
Etoposide_AML_180min_r2_02_43_90	345.18	-142.82	-1
Etoposide_AML_180min_r2_02_43_89	345.18	-142.82	-1
Etoposide_AML_90min_r2_6_61_125	345.08	0	-263.37
Etoposide_AML_90min_r2_6_61_139	345.08	0	-227.64
Etoposide_AML_90min_r2_3_9_18	344.79	-142.82	-200.33
Etoposide_AML_90min_r2_3_9_20	344.79	-142.82	-1
Etoposide_AML_90min_r2_9_74_172	344.73	0	-300.18
Etoposide_AML_90min_r2_9_74_163	344.73	-142.82	-226.67
Etoposide_AML_90min_r2_7_74_165	344.1	-142.82	-295.04
Etoposide_AML_90min_r2_7_74_161	344.1	-142.82	-131.26
Etoposide_AML_180min_r2_02_12_24	343.24	-142.82	-238.53
Etoposide_AML_180min_r2_02_12_25	343.24	0	-90.54
Etoposide_AML_180min_r2_09_59_122	342.72	0	-191.1
Etoposide_AML_180min_r2_09_59_153	342.72	0	-17.22
Etoposide_AML_0min_r2_8_22_43	342.64	0	-145.09
Etoposide_AML_0min_r2_8_22_54	342.64	0	-24.81
Etoposide_AML_0min_r2_3_96_209	342.03	-142.82	-289.68
Etoposide_AML_0min_r2_3_96_266	342.03	-142.82	-197.1
Etoposide_AML_180min_r2_07_24_64	341.73	-142.82	-258.89
Etoposide_AML_180min_r2_07_24_53	341.73	-142.82	-1
Etoposide_AML_0min_r2_8_92_216	341.06	0	-269.16
Etoposide_AML_0min_r2_8_92_189	341.06	0	-161.94
Etoposide_AML_180min_r2_10_44_133	340.7	0	-287.32
Etoposide_AML_180min_r2_10_44_93	340.7	0	-59.54
Etoposide_AML_90min_r2_3_36_93	338.28	-428.46	-288.09
Etoposide_AML_90min_r2_4_63_144	338.28	-142.82	-244.67
Etoposide_AML_90min_r2_3_36_82	338.28	0	-132.33
Etoposide_AML_90min_r2_4_63_138	338.28	0	1
Etoposide_AML_0min_r2_7_0_0	338.08	-142.82	-321.11
Etoposide_AML_0min_r2_7_0_1	338.08	-142.82	-62.21
Etoposide_AML_0min_r2_6_67_197	338.07	0	-391.82
Etoposide_AML_0min_r2_6_67_139	338.07	0	-210.69
Etoposide_AML_90min_r2_6_48_109	338.01	-142.82	-1
Etoposide_AML_90min_r2_6_48_96	338.01	-142.82	-1
Etoposide_AML_0min_r2_5_83_244	338	-142.82	-227.93
Etoposide_AML_0min_r2_5_83_168	338	-142.82	-33.26
Etoposide_AML_0min_r2_3_42_118	336.57	0	-360.31
Etoposide_AML_0min_r2_3_42_95	336.57	0	-212.25
Etoposide_AML_90min_r2_1_52_133	336.3	-142.82	-172.25
Etoposide_AML_90min_r2_1_52_105	336.3	-142.82	-74.11
Etoposide_AML_90min_r2_3_12_23	335.78	-142.82	-246.59
Etoposide_AML_90min_r2_3_12_26	335.78	0	-154.87
Etoposide_AML_0min_r2_4_44_146	335.64	-142.82	-219.4
Etoposide_AML_0min_r2_4_44_101	335.64	-142.82	-64.57
Etoposide_AML_180min_r2_10_4_13	335.54	-142.82	-158.93
Etoposide_AML_180min_r2_10_4_12	335.54	-142.82	-1
Etoposide_AML_90min_r2_6_90_197	335.49	-142.82	-264.97
Etoposide_AML_90min_r2_6_90_182	335.49	-142.82	-239.96
Etoposide_AML_180min_r2_09_43_115	334.9	0	-263.1
Etoposide_AML_180min_r2_09_43_89	334.9	0	-220.15
Etoposide_AML_180min_r2_10_1_3	334.85	-142.82	-217.12
Etoposide_AML_180min_r2_10_1_3	334.85	-142.82	-30.64
Etoposide_AML_90min_r2_1_46_117	334.62	0	-351.67
Etoposide_AML_90min_r2_1_46_92	334.62	0	-178.74
Etoposide_AML_0min_r2_2_72_145	334.36	-142.82	-339
Etoposide_AML_0min_r2_2_72_195	334.36	-142.82	-204.36
Etoposide_AML_180min_r2_10_67_141	334.29	0	-362.95
Etoposide_AML_180min_r2_10_67_192	334.29	0	-148.33
Etoposide_AML_90min_r2_2_25_80	333.9	-142.82	-259.72
Etoposide_AML_90min_r2_2_25_67	333.9	-142.82	-22.56
Etoposide_AML_180min_r2_09_49_129	333.75	-142.82	-347.98
Etoposide_AML_180min_r2_09_49_100	333.75	-142.82	-31.31
Etoposide_AML_90min_r2_3_48_107	333.41	-142.82	-346.16
Etoposide_AML_90min_r2_3_48_123	333.41	-142.82	-188.51
Etoposide_AML_180min_r2_02_26_57	332.52	-142.82	-250.8
Etoposide_AML_180min_r2_02_26_53	332.52	0	-23.01
Etoposide_AML_90min_r2_5_57_117	332.24	-142.82	-216.18
Etoposide_AML_90min_r2_5_57_135	332.24	-142.82	-27.94
Etoposide_AML_180min_r2_09_50_131	332.19	-142.82	-60.08
Etoposide_AML_180min_r2_09_50_103	332.19	-142.82	-20.9
Etoposide_AML_90min_r2_8_91_195	331.2	0	-266.8
Etoposide_AML_90min_r2_8_91_195	331.2	0	-97.89
Etoposide_AML_90min_r2_4_69_148	330.43	0	-309.27
Etoposide_AML_90min_r2_4_69_154	330.43	0	-84.04
Etoposide_AML_90min_r2_2_78_183	330.08	0	-242.38
Etoposide_AML_90min_r2_2_78_221	330.08	-142.82	-83.01
Etoposide_AML_90min_r2_2_28_89	330.03	-142.82	-274.72
Etoposide_AML_90min_r2_2_28_75	330.03	-142.82	-53.5
Etoposide_AML_90min_r2_8_90_193	329.08	0	-195.36
Etoposide_AML_90min_r2_8_90_193	329.08	-142.82	-102.75
Etoposide_AML_0min_r2_5_83_243	328.82	-142.82	-311.54
Etoposide_AML_0min_r2_5_83_169	328.82	-142.82	-147.75
Etoposide_AML_180min_r2_06_72_142	328.81	0	-1
Etoposide_AML_180min_r2_06_72_185	328.81	-142.82	-1
Etoposide_AML_180min_r2_08_25_67	328.39	-142.82	-241.99
Etoposide_AML_180min_r2_08_25_51	328.39	0	-180.55
Etoposide_AML_90min_r2_3_89_202	328.12	0	-360.15
Etoposide_AML_90min_r2_3_89_227	328.12	0	-269.63
Etoposide_AML_180min_r2_09_32_86	328.11	0	-1
Etoposide_AML_180min_r2_09_32_68	328.11	0	-1
Etoposide_AML_180min_r2_06_7_16	327.38	0	1
Etoposide_AML_180min_r2_06_7_23	327.38	-285.64	1
Etoposide_AML_90min_r2_6_56_130	327.04	-142.82	-173.82
Etoposide_AML_90min_r2_6_56_114	327.04	0	-103.1
Etoposide_AML_180min_r2_10_4_11	326.95	0	-356.37
Etoposide_AML_180min_r2_10_4_14	326.95	0	-125.26
Etoposide_AML_90min_r2_4_90_192	326.86	-142.82	-334.48
Etoposide_AML_90min_r2_4_90_197	326.86	-142.82	-90.92
Etoposide_AML_180min_r2_09_5_13	326.81	0	-338.47
Etoposide_AML_180min_r2_09_5_11	326.81	0	-327.8
Etoposide_AML_0min_r2_1_82_223	326.2	0	-272.34
Etoposide_AML_0min_r2_1_82_179	326.2	-142.82	-52.72
Etoposide_AML_90min_r2_3_84_216	325.92	-142.82	-335.65
Etoposide_AML_90min_r2_3_84_191	325.92	0	-329.49
Etoposide_AML_90min_r2_5_17_37	325.8	-142.82	-133.77
Etoposide_AML_90min_r2_5_17_41	325.8	0	1
Etoposide_AML_180min_r2_10_53_112	325.13	0	-310.63
Etoposide_AML_180min_r2_10_53_157	325.13	0	-2.77
Etoposide_AML_90min_r2_8_60_129	325.12	428.46	35.76
Etoposide_AML_90min_r2_8_60_132	325.12	428.46	426.87
Etoposide_AML_0min_r2_5_46_95	324.07	0	-161.16
Etoposide_AML_0min_r2_5_46_134	324.07	-142.82	-151.76
Etoposide_AML_90min_r2_5_71_164	323.52	0	-257.46
Etoposide_AML_90min_r2_5_71_142	323.52	0	-188.89
Etoposide_AML_180min_r2_05_44_114	322.8	-142.82	-1
Etoposide_AML_180min_r2_05_44_88	322.8	-142.82	-1
Etoposide_AML_0min_r2_3_28_69	322.53	0	-55.47
Etoposide_AML_0min_r2_3_28_82	322.53	-142.82	-1
Etoposide_AML_90min_r2_3_84_215	322.36	-142.82	-1
Etoposide_AML_90min_r2_3_84_192	322.36	-142.82	-1
Etoposide_AML_90min_r2_3_70_180	321.8	0	1
Etoposide_AML_90min_r2_3_70_159	321.8	0	1
Etoposide_AML_180min_r2_07_49_126	321.68	0	1
Etoposide_AML_180min_r2_07_49_105	321.68	0	1
Etoposide_AML_90min_r2_4_73_156	321.38	-142.82	-236.37
Etoposide_AML_90min_r2_4_73_161	321.38	0	-16.03
Etoposide_AML_0min_r2_2_25_74	321.07	0	-193.03
Etoposide_AML_0min_r2_2_25_51	321.07	0	-37.39
Etoposide_AML_0min_r2_6_93_266	320.79	0	-1
Etoposide_AML_0min_r2_6_93_191	320.79	0	-1
Etoposide_AML_0min_r2_8_71_175	320.01	-142.82	-6.86
Etoposide_AML_0min_r2_8_71_148	320.01	-142.82	-4.42
Etoposide_AML_180min_r2_09_38_103	319.98	0	-198.46
Etoposide_AML_180min_r2_09_38_79	319.98	0	-123.03
Etoposide_AML_90min_r2_3_91_233	318.82	0	-261.42
Etoposide_AML_90min_r2_3_91_205	318.82	0	-31.45
Etoposide_AML_90min_r2_5_5_12	318.04	0	-1
Etoposide_AML_90min_r2_5_5_10	318.04	0	-1
Etoposide_AML_0min_r2_2_83_164	317.89	0	-61.1
Etoposide_AML_0min_r2_2_83_219	317.89	-142.82	-51.02
Etoposide_AML_90min_r2_9_97_215	317.87	0	-221.11
Etoposide_AML_90min_r2_9_97_213	317.87	-428.46	1
Etoposide_AML_90min_r2_6_9_18	317.66	-142.82	-284.39
Etoposide_AML_90min_r2_6_9_20	317.66	0	-3.35
Etoposide_AML_0min_r2_8_38_93	316.88	-142.82	-296.72
Etoposide_AML_0min_r2_8_38_80	316.88	-142.82	-267.29
Etoposide_AML_90min_r2_8_55_121	316.82	-142.82	-322.44
Etoposide_AML_90min_r2_8_55_119	316.82	-142.82	-263.42
Etoposide_AML_90min_r2_9_57_135	316.81	-142.82	-323.96
Etoposide_AML_90min_r2_9_57_136	316.81	-142.82	-133.3
Etoposide_AML_90min_r2_7_51_120	316.8	0	-254.43
Etoposide_AML_90min_r2_7_51_115	316.8	-428.46	-195.77
Etoposide_AML_90min_r2_7_90_190	316.6	-142.82	-103.96
Etoposide_AML_90min_r2_7_90_196	316.6	285.64	346.49
Etoposide_AML_0min_r2_4_55_178	316.57	-142.82	-227.76
Etoposide_AML_0min_r2_4_55_126	316.57	-142.82	-167.93
Etoposide_AML_90min_r2_3_72_184	315.99	-142.82	-205.27
Etoposide_AML_90min_r2_3_72_164	315.99	-142.82	-118.21
Etoposide_AML_90min_r2_6_89_180	315.94	0	-1
Etoposide_AML_90min_r2_6_89_195	315.94	-142.82	-1
Etoposide_AML_90min_r2_8_77_162	315.91	0	-226.82
Etoposide_AML_90min_r2_8_77_163	315.91	0	-45.76
Etoposide_AML_90min_r2_9_42_102	315.36	-142.82	-323.95
Etoposide_AML_90min_r2_9_42_104	315.36	-142.82	-135.83
Etoposide_AML_180min_r2_10_65_189	315.26	-142.82	-141.34
Etoposide_AML_180min_r2_10_65_137	315.26	-142.82	-50.49
Etoposide_AML_0min_r2_8_78_203	315.18	-142.82	-203.94
Etoposide_AML_0min_r2_8_78_231	315.18	0	-20.56
Etoposide_AML_90min_r2_6_74_150	314.56	0	-295.18
Etoposide_AML_90min_r2_6_74_166	314.56	0	-280.61
Etoposide_AML_180min_r2_10_1_4	314.24	0	-125.51
Etoposide_AML_180min_r2_10_1_4	314.24	-285.64	-84.73
Etoposide_AML_0min_r2_3_18_44	314.05	-142.82	-306.54
Etoposide_AML_0min_r2_3_18_50	314.05	-142.82	-71.02
Etoposide_AML_90min_r2_5_98_220	313.79	0	-327.2
Etoposide_AML_90min_r2_8_72_153	313.79	0	-319.33
Etoposide_AML_90min_r2_5_98_195	313.79	0	-287.81
Etoposide_AML_90min_r2_8_72_154	313.79	0	-212.87
Etoposide_AML_90min_r2_3_41_96	313.08	0	-353.73
Etoposide_AML_90min_r2_3_41_108	313.08	0	-233.13
Etoposide_AML_90min_r2_9_78_180	313.03	-142.82	-338.74
Etoposide_AML_90min_r2_9_78_173	313.03	-142.82	-125.69
Etoposide_AML_0min_r2_1_81_220	312.95	0	-301.2
Etoposide_AML_0min_r2_1_81_178	312.95	0	-290.84
Etoposide_AML_180min_r2_04_59_131	312.94	0	-320.77
Etoposide_AML_180min_r2_11_59_131	312.94	0	-320.77
Etoposide_AML_180min_r2_11_59_161	312.94	0	-299.77
Etoposide_AML_180min_r2_04_59_161	312.94	0	-299.77
Etoposide_AML_90min_r2_3_54_141	312.93	0	-138.66
Etoposide_AML_90min_r2_3_54_124	312.93	0	25.06
Etoposide_AML_0min_r2_2_25_52	312.9	-142.82	-335.62
Etoposide_AML_0min_r2_2_25_73	312.9	-142.82	-278.78
Etoposide_AML_0min_r2_7_97_190	312.74	-142.82	-342.38
Etoposide_AML_0min_r2_7_97_278	312.74	-142.82	-151.46
Etoposide_AML_90min_r2_4_90_198	312.44	-142.82	-1
Etoposide_AML_90min_r2_4_90_193	312.44	-142.82	-1
Etoposide_AML_180min_r2_06_22_44	312.18	0	-310.95
Etoposide_AML_180min_r2_05_57_148	312.18	0	-211.7
Etoposide_AML_180min_r2_05_57_114	312.18	0	-3.88
Etoposide_AML_180min_r2_06_22_61	312.18	0	-1
Etoposide_AML_0min_r2_7_90_259	312.04	-142.82	-195.91
Etoposide_AML_0min_r2_5_97_285	312.04	0	-138.84
Etoposide_AML_0min_r2_5_97_197	312.04	-285.64	-31.34
Etoposide_AML_0min_r2_7_90_174	312.04	-142.82	-25.15
Etoposide_AML_180min_r2_06_74_145	310.74	0	-118.07
Etoposide_AML_180min_r2_06_74_191	310.74	-142.82	-67.4
Etoposide_AML_0min_r2_3_4_13	310.53	-142.82	-241.59
Etoposide_AML_0min_r2_3_4_10	310.53	-142.82	-13.1
Etoposide_AML_0min_r2_8_35_86	310.47	-142.82	-260.86
Etoposide_AML_0min_r2_8_35_73	310.47	-142.82	-42.29
Etoposide_AML_90min_r2_5_18_39	309.9	0	-238.87
Etoposide_AML_90min_r2_5_18_44	309.9	0	-12.49
Etoposide_AML_90min_r2_6_12_25	309.54	0	-208.02
Etoposide_AML_90min_r2_6_12_22	309.54	0	-39.68
Etoposide_AML_0min_r2_1_42_117	309.51	-142.82	-373.99
Etoposide_AML_0min_r2_1_42_96	309.51	-142.82	-270.47
Etoposide_AML_90min_r2_5_24_50	307.92	-142.82	-299.52
Etoposide_AML_90min_r2_5_24_56	307.92	0	-217.72
Etoposide_AML_180min_r2_07_6_17	307.6	0	-1
Etoposide_AML_180min_r2_07_6_16	307.6	0	-1
Etoposide_AML_0min_r2_1_51_116	307.23	-142.82	-299.35
Etoposide_AML_0min_r2_1_51_140	307.23	-142.82	-179.82
Etoposide_AML_90min_r2_8_16_37	307.19	-142.82	-262.24
Etoposide_AML_90min_r2_8_16_38	307.19	0	-7.31
Etoposide_AML_90min_r2_5_77_176	306.73	0	-217.78
Etoposide_AML_90min_r2_5_77_155	306.73	0	-138.08
Etoposide_AML_180min_r2_02_30_66	305.74	428.46	0
Etoposide_AML_180min_r2_02_30_62	305.74	428.46	264.45
Etoposide_AML_0min_r2_1_51_115	304.31	0	-1
Etoposide_AML_0min_r2_1_51_139	304.31	0	1
Etoposide_AML_90min_r2_9_54_129	304.08	0	-349.28
Etoposide_AML_90min_r2_9_54_129	304.08	0	-338.81
Etoposide_AML_180min_r2_07_60_127	303.88	0	-322.49
Etoposide_AML_180min_r2_07_60_151	303.88	0	-170.96
Etoposide_AML_180min_r2_08_49_101	303.79	-142.82	-205.34
Etoposide_AML_180min_r2_08_49_127	303.79	-142.82	-90.51
Etoposide_AML_180min_r2_11_57_128	303.2	0	-277.33
Etoposide_AML_180min_r2_04_57_128	303.2	0	-277.33
Etoposide_AML_180min_r2_04_57_157	303.2	0	-239.42
Etoposide_AML_180min_r2_11_57_157	303.2	0	-239.42
Etoposide_AML_90min_r2_3_41_95	302.96	-142.82	-249.12
Etoposide_AML_90min_r2_3_41_107	302.96	0	-222.21
Etoposide_AML_90min_r2_9_63_145	302.87	-142.82	-295.89
Etoposide_AML_90min_r2_9_63_149	302.87	-142.82	-213.7
Etoposide_AML_0min_r2_1_93_251	302.34	0	-347.72
Etoposide_AML_0min_r2_1_93_201	302.34	0	-248.6
Etoposide_AML_90min_r2_6_19_35	301.8	-142.82	-55.42
Etoposide_AML_90min_r2_6_19_41	301.8	-142.82	-54.29
Etoposide_AML_90min_r2_6_64_130	301.48	-142.82	-294.93
Etoposide_AML_90min_r2_6_64_144	301.48	-142.82	-49.08
Etoposide_AML_90min_r2_4_98_214	300.93	-142.82	-328.27
Etoposide_AML_90min_r2_4_98_208	300.93	-142.82	-65.49
Etoposide_AML_0min_r2_3_78_213	300.75	0	-1
Etoposide_AML_0min_r2_3_78_169	300.75	0	-1
Etoposide_AML_90min_r2_3_74_169	300.54	-142.82	-231.11
Etoposide_AML_90min_r2_3_74_190	300.54	-142.82	-4.19
Etoposide_AML_90min_r2_4_79_169	300.32	0	-330.73
Etoposide_AML_90min_r2_4_79_175	300.32	-142.82	-219.66
Etoposide_AML_180min_r2_07_53_111	300.14	0	-360.98
Etoposide_AML_0min_r2_1_98_262	300.14	0	-313.45
Etoposide_AML_0min_r2_1_98_210	300.14	0	-306.64
Etoposide_AML_180min_r2_07_53_134	300.14	0	-111.42
Etoposide_AML_0min_r2_4_81_251	300.13	0	-1
Etoposide_AML_0min_r2_4_81_176	300.13	0	-1
Etoposide_AML_90min_r2_6_58_133	299.36	-142.82	-61.87
Etoposide_AML_90min_r2_6_58_119	299.36	-142.82	-2.85
Etoposide_AML_90min_r2_6_84_172	299.05	0	-108.86
Etoposide_AML_90min_r2_6_84_186	299.05	-142.82	-70.6
Etoposide_AML_0min_r2_7_23_72	298.85	-142.82	-1
Etoposide_AML_0min_r2_7_23_45	298.85	-142.82	-1
Etoposide_AML_0min_r2_7_70_209	298.35	-142.82	-1
Etoposide_AML_0min_r2_7_70_139	298.35	-142.82	-1
Etoposide_AML_90min_r2_2_47_143	298.19	0	-1
Etoposide_AML_90min_r2_2_47_112	298.19	0	-1
Etoposide_AML_90min_r2_5_70_163	298.12	0	-104.78
Etoposide_AML_90min_r2_5_70_141	298.12	-142.82	-77.69
Etoposide_AML_90min_r2_2_77_218	297.33	-142.82	-276.8
Etoposide_AML_90min_r2_2_77_180	297.33	-142.82	-233.08
Etoposide_AML_90min_r2_2_42_101	296.56	0	-148.73
Etoposide_AML_90min_r2_2_42_129	296.56	-142.82	-32.81
Etoposide_AML_0min_r2_2_63_130	296.48	-142.82	-286.81
Etoposide_AML_0min_r2_2_63_176	296.48	-142.82	-219.1
Etoposide_AML_0min_r2_6_71_209	296.12	0	-386.15
Etoposide_AML_0min_r2_6_71_150	296.12	0	-109.27
Etoposide_AML_180min_r2_10_63_185	295.61	-142.82	-221.65
Etoposide_AML_180min_r2_10_63_132	295.61	0	-41.26
Etoposide_AML_0min_r2_4_89_276	295.52	0	-332.72
Etoposide_AML_0min_r2_4_89_192	295.52	-142.82	-249.63
Etoposide_AML_0min_r2_2_53_146	294.81	-142.82	-374.56
Etoposide_AML_0min_r2_2_53_106	294.81	-142.82	-119.67
Etoposide_AML_90min_r2_3_17_35	294.34	-142.82	-213.64
Etoposide_AML_90min_r2_3_17_41	294.34	-142.82	-203.81
Etoposide_AML_90min_r2_9_89_200	293.93	0	-315.71
Etoposide_AML_90min_r2_9_89_197	293.93	0	-164.95
Etoposide_AML_90min_r2_3_80_182	293.75	0	-75.41
Etoposide_AML_90min_r2_3_80_207	293.75	0	-30.3
Etoposide_AML_0min_r2_4_64_202	293.58	-142.82	-365.84
Etoposide_AML_0min_r2_4_64_142	293.58	-142.82	-318.64
Etoposide_AML_90min_r2_6_61_124	293.46	-142.82	-79.9
Etoposide_AML_90min_r2_6_61_140	293.46	-142.82	0
Etoposide_AML_90min_r2_7_26_61	292.61	-142.82	-164.98
Etoposide_AML_90min_r2_7_26_59	292.61	-142.82	-12.6
Etoposide_AML_90min_r2_3_80_183	292.42	0	-271.94
Etoposide_AML_90min_r2_3_80_206	292.42	-142.82	-256.8
Etoposide_AML_90min_r2_5_78_158	292.27	0	-63.71
Etoposide_AML_90min_r2_5_78_178	292.27	285.64	335.68
Etoposide_AML_0min_r2_8_76_160	292.03	-142.82	-186.92
Etoposide_AML_0min_r2_8_76_186	292.03	-142.82	-16.13
Etoposide_AML_180min_r2_09_39_104	291.9	-142.82	-273.69
Etoposide_AML_180min_r2_09_39_80	291.9	-142.82	-105.22
Etoposide_AML_180min_r2_06_38_103	291.63	-142.82	-345.99
Etoposide_AML_180min_r2_06_38_73	291.63	-142.82	-202.89
Etoposide_AML_180min_r2_10_42_90	291.35	-142.82	-241.53
Etoposide_AML_180min_r2_10_42_129	291.35	-142.82	-207.56
Etoposide_AML_180min_r2_02_21_48	290.73	0	-38.38
Etoposide_AML_180min_r2_02_21_45	290.73	-428.46	-36.39
Etoposide_AML_90min_r2_5_22_52	290.12	-142.82	-322.65
Etoposide_AML_90min_r2_5_22_47	290.12	-142.82	-218.41
Etoposide_AML_180min_r2_07_24_52	289.91	-142.82	-339.4
Etoposide_AML_180min_r2_07_24_63	289.91	-142.82	-333.35
Etoposide_AML_90min_r2_9_83_183	289.84	-142.82	-106.22
Etoposide_AML_90min_r2_9_83_188	289.84	-142.82	-102.34
Etoposide_AML_90min_r2_4_76_168	289.5	0	-1
Etoposide_AML_90min_r2_4_76_162	289.5	0	-1
Etoposide_AML_90min_r2_7_64_148	289.47	-142.82	-257.12
Etoposide_AML_90min_r2_7_64_144	289.47	-142.82	-14.57
Etoposide_AML_90min_r2_6_14_26	289.13	-142.82	-242.99
Etoposide_AML_90min_r2_6_14_30	289.13	-142.82	-42.79
Etoposide_AML_0min_r2_4_79_246	288.72	-142.82	-304.32
Etoposide_AML_0min_r2_4_79_173	288.72	-142.82	-212.47
Etoposide_AML_90min_r2_4_69_155	288.57	-142.82	-133.1
Etoposide_AML_90min_r2_4_69_149	288.57	-285.64	-1
Etoposide_AML_0min_r2_8_69_171	288.27	-142.82	-331.91
Etoposide_AML_0min_r2_8_69_145	288.27	-142.82	-313
Etoposide_AML_180min_r2_05_36_71	288.15	-142.82	-256.43
Etoposide_AML_180min_r2_05_36_95	288.15	0	-51.2
Etoposide_AML_180min_r2_06_24_67	288.04	0	-1
Etoposide_AML_180min_r2_06_24_48	288.04	0	-1
Etoposide_AML_0min_r2_5_92_187	287.23	0	-328.19
Etoposide_AML_0min_r2_5_92_272	287.23	0	-311.28
Etoposide_AML_90min_r2_8_31_72	287.07	0	-322.66
Etoposide_AML_90min_r2_8_31_72	287.07	0	-192.79
Etoposide_AML_0min_r2_1_88_194	285.97	-142.82	-290.88
Etoposide_AML_0min_r2_1_88_240	285.97	-142.82	-137.9
Etoposide_AML_0min_r2_8_52_128	285.3	0	-123.72
Etoposide_AML_0min_r2_8_52_109	285.3	0	1
Etoposide_AML_180min_r2_04_62_136	284.99	0	-293.28
Etoposide_AML_180min_r2_11_62_136	284.99	0	-293.28
Etoposide_AML_180min_r2_11_62_166	284.99	0	-62.54
Etoposide_AML_180min_r2_04_62_166	284.99	0	-62.54
Etoposide_AML_90min_r2_2_25_68	284.8	0	-316.38
Etoposide_AML_90min_r2_2_25_81	284.8	0	-130.63
Etoposide_AML_0min_r2_5_39_79	284.71	0	-183.4
Etoposide_AML_0min_r2_5_39_115	284.71	0	-32.94
Etoposide_AML_90min_r2_2_58_172	284.6	0	-355.23
Etoposide_AML_180min_r2_11_66_168	284.6	-142.82	-297.6
Etoposide_AML_180min_r2_04_66_168	284.6	-142.82	-297.6
Etoposide_AML_180min_r2_11_66_140	284.6	-142.82	-77.12
Etoposide_AML_180min_r2_04_66_140	284.6	-142.82	-77.12
Etoposide_AML_90min_r2_2_58_136	284.6	0	-73.27
Etoposide_AML_0min_r2_1_14_40	284.56	-142.82	-1
Etoposide_AML_0min_r2_1_14_37	284.56	-142.82	-1
Etoposide_AML_180min_r2_10_70_143	284.5	-142.82	-154.73
Etoposide_AML_180min_r2_10_70_194	284.5	0	-99.37
Etoposide_AML_90min_r2_5_89_179	284.45	-142.82	-301.8
Etoposide_AML_90min_r2_5_89_201	284.45	-142.82	-295.34
Etoposide_AML_90min_r2_6_67_151	284.41	0	-1
Etoposide_AML_90min_r2_6_67_137	284.41	0	-1
Etoposide_AML_90min_r2_5_78_177	284.26	-142.82	-208.43
Etoposide_AML_90min_r2_5_78_157	284.26	-142.82	-146.57
Etoposide_AML_90min_r2_4_96_209	283.87	-142.82	-302.08
Etoposide_AML_90min_r2_4_96_204	283.87	-142.82	-201.51
Etoposide_AML_180min_r2_05_0_1	283.31	-142.82	-285.36
Etoposide_AML_180min_r2_05_0_0	283.31	-142.82	-41.78
Etoposide_AML_90min_r2_1_74_190	282.99	0	-142.01
Etoposide_AML_90min_r2_1_74_157	282.99	0	-50.84
Etoposide_AML_90min_r2_9_30_74	282.87	-142.82	-218.99
Etoposide_AML_90min_r2_9_30_77	282.87	-142.82	-191.57
Etoposide_AML_90min_r2_6_57_131	282.55	0	-1
Etoposide_AML_90min_r2_6_57_117	282.55	0	-1
Etoposide_AML_0min_r2_5_69_137	282.53	0	-98.87
Etoposide_AML_0min_r2_5_69_202	282.53	-428.46	-72.7
Etoposide_AML_90min_r2_3_6_11	282.47	0	-1
Etoposide_AML_90min_r2_3_6_12	282.47	-142.82	-1
Etoposide_AML_90min_r2_5_72_167	282.43	-142.82	-267.9
Etoposide_AML_90min_r2_5_72_144	282.43	0	-12.34
Etoposide_AML_180min_r2_09_46_95	282.31	0	-144.67
Etoposide_AML_180min_r2_09_46_122	282.31	-142.82	-21.77
Etoposide_AML_0min_r2_4_89_275	281.95	-142.82	-1
Etoposide_AML_0min_r2_4_89_193	281.95	-142.82	-1
Etoposide_AML_180min_r2_05_89_177	281.93	-142.82	-326.88
Etoposide_AML_180min_r2_05_89_149	281.93	-142.82	-29.04
Etoposide_AML_90min_r2_3_65_168	281.21	0	-192.55
Etoposide_AML_90min_r2_3_65_148	281.21	-142.82	-11.25
Etoposide_AML_0min_r2_5_41_119	281.15	-142.82	-179.19
Etoposide_AML_0min_r2_5_41_82	281.15	-142.82	-2.32
Etoposide_AML_90min_r2_6_17_36	281.11	0	1
Etoposide_AML_90min_r2_6_17_32	281.11	-285.64	1
Etoposide_AML_90min_r2_6_55_112	281.05	0	-149.04
Etoposide_AML_90min_r2_6_55_128	281.05	-428.46	-38.46
Etoposide_AML_90min_r2_3_42_110	280.57	0	-331.62
Etoposide_AML_90min_r2_3_42_98	280.57	0	-123.59
Etoposide_AML_0min_r2_8_78_165	280.4	-142.82	-360.22
Etoposide_AML_0min_r2_8_78_190	280.4	-142.82	-245.44
Etoposide_AML_90min_r2_4_95_203	280.17	-142.82	-322.15
Etoposide_AML_90min_r2_4_95_207	280.17	0	-114.49
Etoposide_AML_0min_r2_7_28_84	279.94	0	-232.81
Etoposide_AML_0min_r2_7_28_55	279.94	0	-224.34
Etoposide_AML_90min_r2_6_7_16	279.81	-142.82	-289.11
Etoposide_AML_90min_r2_6_7_14	279.81	-142.82	-235.38
Etoposide_AML_0min_r2_1_81_221	279.35	-142.82	-338.66
Etoposide_AML_0min_r2_1_81_177	279.35	0	-217.26
Etoposide_AML_90min_r2_6_28_59	279.35	0	1
Etoposide_AML_90min_r2_6_28_51	279.35	0	1
Etoposide_AML_180min_r2_08_20_43	279.31	-142.82	-269.65
Etoposide_AML_180min_r2_08_20_53	279.31	0	-213.22
Etoposide_AML_90min_r2_1_85_178	279.18	-142.82	-353.38
Etoposide_AML_90min_r2_1_85_215	279.18	0	-202.55
Etoposide_AML_180min_r2_04_46_107	279.18	-142.82	-180.59
Etoposide_AML_180min_r2_11_46_107	279.18	-142.82	-180.59
Etoposide_AML_180min_r2_04_46_128	279.18	-142.82	-37.15
Etoposide_AML_180min_r2_11_46_128	279.18	-142.82	-37.15
Etoposide_AML_90min_r2_3_58_151	279.17	-285.64	-317.11
Etoposide_AML_90min_r2_3_58_133	279.17	0	-167.09
Etoposide_AML_90min_r2_3_57_149	278.93	0	-70.51
Etoposide_AML_90min_r2_3_57_131	278.93	0	-43.12
Etoposide_AML_180min_r2_08_55_141	278.91	-142.82	-307.91
Etoposide_AML_180min_r2_08_55_113	278.91	-142.82	-147.97
Etoposide_AML_0min_r2_7_30_91	278.89	0	-310.8
Etoposide_AML_0min_r2_7_30_59	278.89	0	-76.34
Etoposide_AML_90min_r2_8_8_20	278.73	0	-159.75
Etoposide_AML_90min_r2_8_8_21	278.73	-142.82	-45.75
Etoposide_AML_180min_r2_08_55_114	277.35	-142.82	-320.22
Etoposide_AML_180min_r2_08_55_142	277.35	-142.82	-312.99
Etoposide_AML_0min_r2_3_12_30	277.28	-142.82	-186.11
Etoposide_AML_0min_r2_3_12_32	277.28	0	-70.91
Etoposide_AML_0min_r2_1_34_91	276.98	-142.82	-1
Etoposide_AML_0min_r2_1_34_78	276.98	-142.82	-1
Etoposide_AML_0min_r2_7_59_182	276.65	-142.82	-235.97
Etoposide_AML_0min_r2_7_59_113	276.65	0	-198.7
Etoposide_AML_0min_r2_1_14_39	276.24	-142.82	-354.63
Etoposide_AML_90min_r2_3_88_226	276.24	0	-178.47
Etoposide_AML_0min_r2_1_14_36	276.24	-142.82	-155.39
Etoposide_AML_90min_r2_3_88_201	276.24	0	-17.05
Etoposide_AML_90min_r2_8_41_90	275.7	0	-316.07
Etoposide_AML_90min_r2_2_77_219	275.7	-142.82	-188.65
Etoposide_AML_90min_r2_8_41_92	275.7	0	-161.11
Etoposide_AML_90min_r2_4_98_213	275.7	0	-119.63
Etoposide_AML_90min_r2_4_98_209	275.7	0	-54.8
Etoposide_AML_90min_r2_2_77_181	275.7	-142.82	-44.05
Etoposide_AML_0min_r2_5_97_284	275.31	0	-388.44
Etoposide_AML_0min_r2_5_97_196	275.31	-142.82	-138.76
Etoposide_AML_90min_r2_8_91_194	275.17	0	-217.47
Etoposide_AML_90min_r2_8_91_194	275.17	0	-12.05
Etoposide_AML_180min_r2_09_45_92	274.64	0	-316.97
Etoposide_AML_180min_r2_09_45_121	274.64	0	-254.1
Etoposide_AML_0min_r2_4_44_147	274.34	0	-341.44
Etoposide_AML_0min_r2_4_44_102	274.34	0	-198.37
Etoposide_AML_180min_r2_11_56_125	274.14	-142.82	-132.37
Etoposide_AML_180min_r2_04_56_125	274.14	-142.82	-132.37
Etoposide_AML_180min_r2_11_56_155	274.14	0	-38.39
Etoposide_AML_180min_r2_04_56_155	274.14	0	-38.39
Etoposide_AML_90min_r2_6_36_81	274.06	-142.82	-293.11
Etoposide_AML_90min_r2_6_36_68	274.06	0	-273.3
Etoposide_AML_90min_r2_5_1_4	273.97	-142.82	-1
Etoposide_AML_90min_r2_5_1_2	273.97	-142.82	-1
Etoposide_AML_180min_r2_07_45_115	273.89	0	-232.71
Etoposide_AML_180min_r2_07_45_96	273.89	0	-134.9
Etoposide_AML_90min_r2_3_89_228	273.72	-142.82	-274.41
Etoposide_AML_90min_r2_3_89_203	273.72	-142.82	-85.27
Etoposide_AML_90min_r2_3_29_72	273.63	-142.82	-205.52
Etoposide_AML_90min_r2_3_29_61	273.63	-142.82	-190.63
Etoposide_AML_90min_r2_6_73_148	273.6	-142.82	-259.19
Etoposide_AML_90min_r2_6_73_163	273.6	0	-142.18
Etoposide_AML_180min_r2_07_60_152	273.27	0	-574.39
Etoposide_AML_180min_r2_07_60_126	273.27	0	1
Etoposide_AML_90min_r2_2_45_137	272.45	0	-231.25
Etoposide_AML_90min_r2_2_45_108	272.45	0	1
Etoposide_AML_90min_r2_3_70_158	272.43	0	-85.11
Etoposide_AML_90min_r2_3_70_181	272.43	0	-1
Etoposide_AML_90min_r2_9_54_130	272.27	0	-1
Etoposide_AML_90min_r2_9_54_130	272.27	0	-1
Etoposide_AML_90min_r2_6_22_45	272.17	0	-310.27
Etoposide_AML_90min_r2_6_22_40	272.17	0	-250.56
Etoposide_AML_90min_r2_8_40_91	271.35	0	-20.63
Etoposide_AML_90min_r2_8_40_89	271.35	0	-1
Etoposide_AML_90min_r2_5_69_138	271.32	-142.82	-154.89
Etoposide_AML_90min_r2_5_69_160	271.32	-142.82	-26.04
Etoposide_AML_0min_r2_6_37_114	271.06	-142.82	-284.6
Etoposide_AML_0min_r2_6_37_80	271.06	-142.82	-43.69
Etoposide_AML_0min_r2_3_55_153	270.86	-142.82	-241.28
Etoposide_AML_0min_r2_3_55_121	270.86	0	-5.7
Etoposide_AML_0min_r2_8_24_59	270.85	-142.82	-146.18
Etoposide_AML_0min_r2_8_24_45	270.85	-142.82	-11.1
Etoposide_AML_0min_r2_6_72_211	270.61	0	-88.59
Etoposide_AML_0min_r2_6_72_152	270.61	0	-88.08
Etoposide_AML_90min_r2_8_5_14	270.55	-142.82	-1
Etoposide_AML_90min_r2_8_5_14	270.55	-142.82	-1
Etoposide_AML_0min_r2_2_46_125	270.25	-142.82	-149.1
Etoposide_AML_0min_r2_2_46_91	270.25	-142.82	-62.32
Etoposide_AML_90min_r2_4_63_137	269.67	0	-168.13
Etoposide_AML_90min_r2_4_63_145	269.67	-285.64	-71.9
Etoposide_AML_90min_r2_7_18_46	269.58	-142.82	-293.63
Etoposide_AML_90min_r2_7_18_45	269.58	-142.82	-290.74
Etoposide_AML_90min_r2_1_69_147	269.47	-142.82	-227.14
Etoposide_AML_90min_r2_1_69_179	269.47	0	-24.84
Etoposide_AML_90min_r2_6_42_94	268.93	0	-281
Etoposide_AML_90min_r2_6_42_83	268.93	0	-204.7
Etoposide_AML_90min_r2_9_35_88	268.53	-142.82	-300.59
Etoposide_AML_90min_r2_9_35_85	268.53	-142.82	-193.76
Etoposide_AML_90min_r2_9_71_166	268.43	-142.82	-171.35
Etoposide_AML_90min_r2_9_71_156	268.43	-142.82	-170.41
Etoposide_AML_180min_r2_09_38_102	268.41	0	-1
Etoposide_AML_180min_r2_09_38_78	268.41	0	-1
Etoposide_AML_0min_r2_1_91_197	268.39	0	-195.65
Etoposide_AML_0min_r2_1_91_246	268.39	-142.82	-1
Etoposide_AML_90min_r2_6_68_139	268.22	-142.82	-297.95
Etoposide_AML_90min_r2_6_68_152	268.22	-142.82	-51.35
Etoposide_AML_180min_r2_06_54_145	268	0	-361.35
Etoposide_AML_180min_r2_06_54_108	268	-428.46	-246.93
Etoposide_AML_90min_r2_5_21_51	267.51	0	-308.81
Etoposide_AML_90min_r2_5_21_45	267.51	0	-216.43
Etoposide_AML_0min_r2_7_71_265	267.3	0	-365.59
Etoposide_AML_0min_r2_7_71_179	267.3	0	-216.53
Etoposide_AML_0min_r2_4_60_135	267.15	0	-135.55
Etoposide_AML_0min_r2_4_60_192	267.15	0	-35.69
Etoposide_AML_180min_r2_02_24_50	267.05	0	-163.92
Etoposide_AML_180min_r2_02_24_54	267.05	0	0
Etoposide_AML_90min_r2_4_19_43	266.83	0	-284.66
Etoposide_AML_90min_r2_4_19_35	266.83	0	-235.91
Etoposide_AML_180min_r2_07_45_97	266.64	0	-207.79
Etoposide_AML_180min_r2_07_45_116	266.64	-142.82	-205.47
Etoposide_AML_90min_r2_4_97_206	266.26	0	-272.03
Etoposide_AML_90min_r2_4_97_212	266.26	0	308.64
Etoposide_AML_0min_r2_1_95_205	265.94	0	-1
Etoposide_AML_0min_r2_1_95_256	265.94	0	1
Etoposide_AML_90min_r2_8_4_13	265.56	-142.82	-1
Etoposide_AML_90min_r2_8_4_13	265.56	-142.82	-1
Etoposide_AML_90min_r2_2_83_233	265.02	0	-280.23
Etoposide_AML_90min_r2_2_83_195	265.02	0	-119.09
Etoposide_AML_90min_r2_1_94_235	264.97	0	-349.44
Etoposide_AML_90min_r2_1_94_196	264.97	0	-297.22
Etoposide_AML_180min_r2_02_3_8	264.76	-142.82	-285.45
Etoposide_AML_180min_r2_02_3_8	264.76	0	-165
Etoposide_AML_90min_r2_5_9_18	264.7	-142.82	-179.48
Etoposide_AML_90min_r2_5_9_22	264.7	-142.82	-79.18
Etoposide_AML_0min_r2_8_27_56	264.28	0	-192.16
Etoposide_AML_0min_r2_8_27_67	264.28	0	-86.64
Etoposide_AML_90min_r2_8_41_93	264.16	0	-123.75
Etoposide_AML_90min_r2_8_41_91	264.16	0	-90.24
Etoposide_AML_180min_r2_03_16_49	263.73	0	-132.81
Etoposide_AML_180min_r2_03_16_35	263.73	0	1
Etoposide_AML_0min_r2_6_44_94	263.68	0	-126.53
Etoposide_AML_0min_r2_6_44_135	263.68	0	-61.56
Etoposide_AML_180min_r2_11_40_94	263.67	0	-219.23
Etoposide_AML_180min_r2_04_40_94	263.67	0	-219.23
Etoposide_AML_180min_r2_11_40_114	263.67	0	-215.59
Etoposide_AML_180min_r2_04_40_114	263.67	0	-215.59
Etoposide_AML_0min_r2_6_72_210	263.24	-142.82	-224.45
Etoposide_AML_0min_r2_6_72_151	263.24	-142.82	-1.38
Etoposide_AML_0min_r2_3_14_38	262.94	0	-344.9
Etoposide_AML_0min_r2_3_14_35	262.94	0	-197.39
Etoposide_AML_90min_r2_8_63_134	262.71	0	-1
Etoposide_AML_90min_r2_8_63_138	262.71	-428.46	-1
Etoposide_AML_90min_r2_5_92_208	262.5	0	-330.47
Etoposide_AML_180min_r2_05_38_99	262.5	-142.82	-252.73
Etoposide_AML_90min_r2_5_92_184	262.5	0	-194.12
Etoposide_AML_180min_r2_05_38_76	262.5	-142.82	-86.77
Etoposide_AML_90min_r2_8_51_113	262.45	-142.82	-152.87
Etoposide_AML_90min_r2_8_51_111	262.45	-142.82	-109.33
Etoposide_AML_0min_r2_1_95_255	262.07	-142.82	-1
Etoposide_AML_0min_r2_1_95_206	262.07	-142.82	-1
Etoposide_AML_90min_r2_4_26_58	261.64	0	-332.81
Etoposide_AML_90min_r2_4_26_50	261.64	-142.82	-312.22
Etoposide_AML_0min_r2_8_72_151	261.39	-142.82	-358.51
Etoposide_AML_0min_r2_8_72_177	261.39	-142.82	-1
Etoposide_AML_180min_r2_05_7_14	261.28	-142.82	-139.67
Etoposide_AML_180min_r2_05_7_13	261.28	-142.82	-21.92
Etoposide_AML_0min_r2_5_41_83	261.23	-142.82	-323.88
Etoposide_AML_0min_r2_5_41_120	261.23	-142.82	-100.79
Etoposide_AML_0min_r2_2_12_32	260.91	0	-214.86
Etoposide_AML_0min_r2_2_12_25	260.91	0	-12.31
Etoposide_AML_90min_r2_9_5_13	260.76	-142.82	-139.6
Etoposide_AML_90min_r2_9_5_14	260.76	-142.82	-48.91
Etoposide_AML_0min_r2_1_80_218	260.74	0	-323.17
Etoposide_AML_0min_r2_1_80_175	260.74	-142.82	-241.74
Etoposide_AML_180min_r2_07_55_116	260.26	0	-324.53
Etoposide_AML_180min_r2_07_55_138	260.26	-142.82	-38.6
Etoposide_AML_90min_r2_1_65_167	260.07	-142.82	-146.78
Etoposide_AML_90min_r2_1_65_138	260.07	-142.82	-58.24
Etoposide_AML_180min_r2_07_33_74	259.67	-142.82	-213.03
Etoposide_AML_180min_r2_07_33_87	259.67	0	-207.88
Etoposide_AML_180min_r2_06_74_190	259.27	-142.82	-139.74
Etoposide_AML_180min_r2_06_74_144	259.27	-142.82	-11.82
Etoposide_AML_0min_r2_2_93_244	259.11	0	-1
Etoposide_AML_0min_r2_2_93_184	259.11	0	-1
Etoposide_AML_0min_r2_8_22_55	259.03	0	-209.3
Etoposide_AML_0min_r2_8_22_42	259.03	0	-90.48
Etoposide_AML_0min_r2_4_97_299	258.8	0	-310.69
Etoposide_AML_0min_r2_4_97_209	258.8	0	-304.28
Etoposide_AML_0min_r2_8_13_25	258.8	0	-1
Etoposide_AML_0min_r2_8_13_32	258.8	-142.82	-1
Etoposide_AML_90min_r2_4_91_199	258.64	-142.82	-293.06
Etoposide_AML_90min_r2_4_91_194	258.64	-142.82	-181.7
Etoposide_AML_180min_r2_11_50_114	258.47	0	-339.65
Etoposide_AML_180min_r2_04_50_114	258.47	0	-339.65
Etoposide_AML_180min_r2_04_50_141	258.47	0	-209.55
Etoposide_AML_180min_r2_11_50_141	258.47	0	-209.55
Etoposide_AML_0min_r2_5_76_153	258.41	-142.82	-332.79
Etoposide_AML_0min_r2_5_76_224	258.41	-142.82	-240.52
Etoposide_AML_0min_r2_7_71_210	257.57	-142.82	-365.85
Etoposide_AML_0min_r2_7_71_141	257.57	-142.82	-285.34
Etoposide_AML_90min_r2_2_48_115	257.39	0	-1
Etoposide_AML_90min_r2_2_48_145	257.39	-142.82	-1
Etoposide_AML_90min_r2_8_21_53	257.32	-142.82	-1
Etoposide_AML_90min_r2_8_21_53	257.32	-142.82	-1
Etoposide_AML_90min_r2_6_33_75	256.97	-142.82	-328.76
Etoposide_AML_90min_r2_6_33_62	256.97	-142.82	-242.16
Etoposide_AML_0min_r2_6_89_258	256.53	0	-329.37
Etoposide_AML_0min_r2_6_89_185	256.53	0	-164.98
Etoposide_AML_90min_r2_6_53_108	256.36	-142.82	-285.21
Etoposide_AML_90min_r2_6_53_123	256.36	0	-152.29
Etoposide_AML_90min_r2_3_3_6	256.27	0	-82.38
Etoposide_AML_90min_r2_3_3_6	256.27	0	1
Etoposide_AML_0min_r2_4_76_167	256.07	-428.46	-184.95
Etoposide_AML_0min_r2_4_76_238	256.07	0	-56.02
Etoposide_AML_90min_r2_5_54_132	256.02	-142.82	-335.98
Etoposide_AML_90min_r2_5_54_111	256.02	-142.82	-299.16
Etoposide_AML_0min_r2_8_92_215	255.62	-142.82	-276.06
Etoposide_AML_0min_r2_8_92_190	255.62	-142.82	-149.56
Etoposide_AML_180min_r2_06_16_31	255.62	0	-118.83
Etoposide_AML_180min_r2_06_16_45	255.62	-428.46	-10.49
Etoposide_AML_180min_r2_02_14_29	255.6	-285.64	-264.07
Etoposide_AML_180min_r2_02_14_30	255.6	-285.64	-95.89
Etoposide_AML_0min_r2_6_66_138	255.52	-142.82	-397.44
Etoposide_AML_0min_r2_6_66_195	255.52	-142.82	-243.11
Etoposide_AML_90min_r2_1_22_47	255.31	-142.82	-193.79
Etoposide_AML_90min_r2_1_22_57	255.31	-142.82	-174.42
Etoposide_AML_90min_r2_5_89_178	255.31	0	-140.67
Etoposide_AML_90min_r2_5_89_200	255.31	0	1
Etoposide_AML_90min_r2_1_52_106	255.26	-142.82	-340.79
Etoposide_AML_90min_r2_1_52_134	255.26	-142.82	-250.12
Etoposide_AML_90min_r2_8_5_15	254.69	0	-1
Etoposide_AML_90min_r2_8_5_15	254.69	-142.82	-1
Etoposide_AML_0min_r2_8_77_188	254.25	-142.82	-1
Etoposide_AML_0min_r2_8_77_162	254.25	-142.82	-1
Etoposide_AML_0min_r2_8_41_98	254.02	-142.82	-331.37
Etoposide_AML_0min_r2_8_41_84	254.02	-142.82	-275.26
Etoposide_AML_0min_r2_3_53_148	253.63	0	-352.58
Etoposide_AML_0min_r2_3_53_117	253.63	-428.46	-245.47
Etoposide_AML_90min_r2_5_80_162	253.57	0	-314.93
Etoposide_AML_90min_r2_5_80_182	253.57	0	-11.3
Etoposide_AML_0min_r2_8_74_155	253.38	-142.82	-352.65
Etoposide_AML_0min_r2_8_74_180	253.38	-142.82	-195.83
Etoposide_AML_90min_r2_6_80_163	252.68	-142.82	-107.96
Etoposide_AML_90min_r2_6_80_177	252.68	-142.82	-41.81
Etoposide_AML_90min_r2_8_56_123	252.5	-142.82	-253.42
Etoposide_AML_90min_r2_8_56_120	252.5	-142.82	-27.04
Etoposide_AML_180min_r2_07_17_38	252.37	0	-342.06
Etoposide_AML_180min_r2_07_17_47	252.37	0	-325.37
Etoposide_AML_180min_r2_05_37_96	252.25	0	-1
Etoposide_AML_180min_r2_05_37_74	252.25	0	1
Etoposide_AML_90min_r2_7_40_95	252.19	0	-273.64
Etoposide_AML_90min_r2_7_40_90	252.19	0	-141.89
Etoposide_AML_90min_r2_8_42_94	252.1	0	-1
Etoposide_AML_90min_r2_8_42_93	252.1	-142.82	1
Etoposide_AML_90min_r2_7_47_106	251.81	-142.82	-280.61
Etoposide_AML_90min_r2_7_47_112	251.81	-142.82	-1
Etoposide_AML_0min_r2_8_91_214	251.79	0	-189.45
Etoposide_AML_0min_r2_8_91_188	251.79	-142.82	-153.15
Etoposide_AML_90min_r2_6_90_183	251.34	-142.82	-202.21
Etoposide_AML_90min_r2_6_90_198	251.34	-142.82	-38.98
Etoposide_AML_90min_r2_5_82_166	251.22	0	-225.35
Etoposide_AML_90min_r2_5_82_185	251.22	0	1
Etoposide_AML_90min_r2_4_20_45	251.15	0	-1
Etoposide_AML_90min_r2_4_20_37	251.15	0	-1
Etoposide_AML_180min_r2_08_20_54	251.14	-142.82	-269.78
Etoposide_AML_180min_r2_08_20_42	251.14	-142.82	-148.86
Etoposide_AML_0min_r2_4_10_30	251.08	-142.82	-256.15
Etoposide_AML_90min_r2_5_40_79	251.08	-142.82	-202.23
Etoposide_AML_0min_r2_4_10_19	251.08	-142.82	-17.4
Etoposide_AML_90min_r2_5_40_93	251.08	0	1
Etoposide_AML_90min_r2_5_45_88	251.02	0	-1
Etoposide_AML_90min_r2_5_45_105	251.02	-142.82	-1
Etoposide_AML_0min_r2_6_29_63	250.45	0	-1
Etoposide_AML_0min_r2_6_29_92	250.45	-142.82	-1
Etoposide_AML_0min_r2_4_90_277	250.21	-142.82	-1
Etoposide_AML_0min_r2_4_90_195	250.21	-142.82	-1
Etoposide_AML_180min_r2_11_66_141	249.78	-142.82	-350.31
Etoposide_AML_180min_r2_04_66_141	249.78	-142.82	-350.31
Etoposide_AML_180min_r2_11_66_169	249.78	-142.82	-169.33
Etoposide_AML_180min_r2_04_66_169	249.78	-142.82	-169.33
Etoposide_AML_180min_r2_02_41_86	249.69	0	-313.57
Etoposide_AML_180min_r2_02_41_85	249.69	0	-310.9
Etoposide_AML_0min_r2_4_70_155	249.53	-142.82	-368.33
Etoposide_AML_0min_r2_4_70_220	249.53	-142.82	-279.05
Etoposide_AML_0min_r2_4_48_159	249.41	-142.82	-384.56
Etoposide_AML_0min_r2_4_48_111	249.41	-142.82	-344.93
Etoposide_AML_180min_r2_10_47_142	248.34	0	1
Etoposide_AML_180min_r2_10_47_99	248.34	0	1
Etoposide_AML_90min_r2_7_71_157	247.8	-142.82	-282.04
Etoposide_AML_90min_r2_7_71_162	247.8	0	-254.64
Etoposide_AML_0min_r2_1_20_48	247.33	0	-243.01
Etoposide_AML_0min_r2_1_20_54	247.33	0	-1
Etoposide_AML_90min_r2_4_70_156	247.3	-142.82	-1
Etoposide_AML_90min_r2_4_70_150	247.3	-142.82	-1
Etoposide_AML_90min_r2_6_57_116	246.55	-142.82	-285.38
Etoposide_AML_90min_r2_6_57_132	246.55	-142.82	-212.68
Etoposide_AML_180min_r2_09_4_11	246.29	-142.82	-334.2
Etoposide_AML_180min_r2_09_4_9	246.29	-142.82	-1
Etoposide_AML_0min_r2_2_83_165	245.8	-142.82	-389.56
Etoposide_AML_0min_r2_2_83_220	245.8	-142.82	-203.54
Etoposide_AML_90min_r2_7_93_196	245.5	0	-55.51
Etoposide_AML_90min_r2_7_93_203	245.5	0	-41.54
Etoposide_AML_90min_r2_6_24_51	245.4	-142.82	-130.12
Etoposide_AML_90min_r2_6_24_45	245.4	-142.82	-85.69
Etoposide_AML_0min_r2_4_27_84	245.16	0	-305.62
Etoposide_AML_0min_r2_4_27_58	245.16	0	-90.51
Etoposide_AML_90min_r2_7_65_145	245.09	-142.82	-331.74
Etoposide_AML_90min_r2_7_65_151	245.09	-142.82	-174.92
Etoposide_AML_90min_r2_3_33_86	244.94	-142.82	-2.93
Etoposide_AML_90min_r2_3_33_74	244.94	-142.82	-1
Etoposide_AML_180min_r2_09_46_123	244.19	-142.82	-1
Etoposide_AML_180min_r2_09_46_94	244.19	0	1
Etoposide_AML_90min_r2_5_17_42	244.1	0	-326.58
Etoposide_AML_90min_r2_5_17_36	244.1	0	-124.42
Etoposide_AML_0min_r2_5_4_11	244.03	-142.82	-338.35
Etoposide_AML_0min_r2_5_4_12	244.03	-142.82	-100.25
Etoposide_AML_180min_r2_08_19_51	243.77	-142.82	-219.12
Etoposide_AML_180min_r2_08_19_41	243.77	0	-96.49
Etoposide_AML_90min_r2_9_98_216	243.33	0	-69.94
Etoposide_AML_90min_r2_9_98_217	243.33	0	-58.22
Etoposide_AML_90min_r2_3_93_210	243.21	0	-332
Etoposide_AML_90min_r2_3_93_237	243.21	-142.82	-105.44
Etoposide_AML_0min_r2_8_15_37	243.21	-142.82	-1
Etoposide_AML_0min_r2_8_15_29	243.21	-142.82	-1
Etoposide_AML_0min_r2_3_16_39	243.13	-142.82	-255.42
Etoposide_AML_0min_r2_3_16_44	243.13	-142.82	-40.26
Etoposide_AML_90min_r2_9_74_171	243.01	-142.82	-233.96
Etoposide_AML_90min_r2_9_74_162	243.01	-142.82	-83.39
Etoposide_AML_90min_r2_7_69_154	242.79	0	-239.54
Etoposide_AML_90min_r2_7_69_158	242.79	0	1
Etoposide_AML_0min_r2_8_13_33	241.77	0	-230.32
Etoposide_AML_0min_r2_8_13_24	241.77	0	-1.01
Etoposide_AML_90min_r2_4_40_92	241.74	0	-238.47
Etoposide_AML_90min_r2_4_40_85	241.74	0	-16.64
Etoposide_AML_180min_r2_07_49_125	241	0	-110.47
Etoposide_AML_180min_r2_07_49_106	241	0	-110.05
Etoposide_AML_0min_r2_3_18_49	240.61	0	-305.25
Etoposide_AML_0min_r2_3_18_43	240.61	0	-229.59
Etoposide_AML_90min_r2_4_20_38	240.57	-142.82	-92.68
Etoposide_AML_90min_r2_4_20_44	240.57	-142.82	1
Etoposide_AML_0min_r2_2_92_183	240.54	0	-124.41
Etoposide_AML_0min_r2_2_92_243	240.54	0	-87.53
Etoposide_AML_180min_r2_08_36_72	240.44	0	-301.71
Etoposide_AML_180min_r2_08_36_94	240.44	0	1
Etoposide_AML_180min_r2_05_37_73	239.32	-142.82	-293.67
Etoposide_AML_180min_r2_05_37_97	239.32	-142.82	-8.3
Etoposide_AML_0min_r2_3_8_22	239.06	-142.82	-320.24
Etoposide_AML_0min_r2_3_8_20	239.06	-142.82	-180.16
Etoposide_AML_0min_r2_8_15_36	238.91	-142.82	-1
Etoposide_AML_0min_r2_8_15_28	238.91	-142.82	-1
Etoposide_AML_0min_r2_8_84_174	238.51	-142.82	-116.18
Etoposide_AML_0min_r2_8_84_200	238.51	-142.82	-28.99
Etoposide_AML_90min_r2_3_43_100	237.83	0	-57.02
Etoposide_AML_90min_r2_3_43_112	237.83	-142.82	-36.9
Etoposide_AML_180min_r2_05_38_98	237.17	0	-95.1
Etoposide_AML_180min_r2_05_38_75	237.17	0	-14.8
Etoposide_AML_180min_r2_02_25_56	236.92	0	-342.99
Etoposide_AML_180min_r2_02_25_52	236.92	-142.82	-133.65
Etoposide_AML_0min_r2_2_29_84	236.65	0	-152.36
Etoposide_AML_0min_r2_2_29_59	236.65	-142.82	-65.16
Etoposide_AML_90min_r2_6_19_40	236.23	0	-99.68
Etoposide_AML_90min_r2_6_19_36	236.23	0	-78.64
Etoposide_AML_90min_r2_7_46_105	236.17	-428.46	-308.05
Etoposide_AML_90min_r2_7_46_111	236.17	0	-306.12
Etoposide_AML_0min_r2_3_56_122	236.05	0	1
Etoposide_AML_0min_r2_3_56_155	236.05	-428.46	1
Etoposide_AML_90min_r2_4_45_99	235.91	-142.82	-149.32
Etoposide_AML_90min_r2_4_45_104	235.91	-142.82	-62.82
Etoposide_AML_0min_r2_6_5_16	235.68	-142.82	-265.06
Etoposide_AML_0min_r2_6_5_11	235.68	-142.82	-44.95
Etoposide_AML_90min_r2_3_17_40	235.55	-142.82	-288.16
Etoposide_AML_90min_r2_3_17_34	235.55	-142.82	-212.91
Etoposide_AML_90min_r2_3_0_0	235.51	0	-1
Etoposide_AML_90min_r2_3_0_0	235.51	0	-1
Etoposide_AML_90min_r2_1_69_178	235.43	-142.82	-236.35
Etoposide_AML_90min_r2_1_69_146	235.43	-142.82	-91.5
Etoposide_AML_0min_r2_1_34_92	235.25	-142.82	-381.41
Etoposide_AML_90min_r2_1_15_37	235.25	0	-320.98
Etoposide_AML_90min_r2_1_15_30	235.25	0	-318.45
Etoposide_AML_0min_r2_1_34_79	235.25	-142.82	-163.45
Etoposide_AML_0min_r2_5_92_273	235.14	-142.82	-144.57
Etoposide_AML_0min_r2_5_92_188	235.14	0	1
Etoposide_AML_0min_r2_1_78_215	235.13	0	-1
Etoposide_AML_0min_r2_1_78_171	235.13	-142.82	-1
Etoposide_AML_0min_r2_2_93_185	234.86	-428.46	-139.32
Etoposide_AML_0min_r2_2_93_245	234.86	-285.64	1
Etoposide_AML_180min_r2_07_53_135	234.77	-142.82	-332.25
Etoposide_AML_180min_r2_07_53_112	234.77	0	1
Etoposide_AML_0min_r2_8_28_59	234.72	-142.82	-158.82
Etoposide_AML_0min_r2_8_28_68	234.72	-142.82	-8.05
Etoposide_AML_0min_r2_4_62_199	234.05	0	-116.25
Etoposide_AML_0min_r2_4_62_140	234.05	-142.82	-21.24
Etoposide_AML_0min_r2_3_58_160	233.74	-142.82	-318.24
Etoposide_AML_0min_r2_3_58_127	233.74	-142.82	-13.68
Etoposide_AML_180min_r2_10_43_91	233.69	0	-334.78
Etoposide_AML_180min_r2_10_43_130	233.69	-428.46	1
Etoposide_AML_180min_r2_08_31_62	233.39	-142.82	-243.01
Etoposide_AML_180min_r2_08_31_82	233.39	-142.82	-229.84
Etoposide_AML_0min_r2_6_73_153	233.34	0	-287.88
Etoposide_AML_0min_r2_6_73_212	233.34	-142.82	-73.06
Etoposide_AML_180min_r2_06_72_141	233.22	-142.82	-66.78
Etoposide_AML_180min_r2_06_72_186	233.22	-142.82	-24.89
Etoposide_AML_180min_r2_04_15_42	233	-142.82	-328
Etoposide_AML_180min_r2_11_15_42	233	-142.82	-328
Etoposide_AML_180min_r2_04_15_50	233	0	-301.52
Etoposide_AML_180min_r2_11_15_50	233	0	-301.52
Etoposide_AML_90min_r2_9_94_210	232.75	0	-1
Etoposide_AML_90min_r2_9_94_207	232.75	0	-1
Etoposide_AML_90min_r2_9_89_198	232.23	-428.46	-54.33
Etoposide_AML_90min_r2_9_89_201	232.23	0	-12.85
Etoposide_AML_90min_r2_4_71_159	232.15	0	-91.68
Etoposide_AML_90min_r2_4_71_153	232.15	-142.82	-5.94
Etoposide_AML_180min_r2_06_21_59	232.02	0	-298.91
Etoposide_AML_180min_r2_06_21_41	232.02	0	-212.99
Etoposide_AML_90min_r2_4_76_167	231.92	0	-338.95
Etoposide_AML_90min_r2_4_76_161	231.92	0	-257.24
Etoposide_AML_180min_r2_06_5_18	231.91	0	-328.84
Etoposide_AML_180min_r2_06_5_12	231.91	-142.82	-213.73
Etoposide_AML_90min_r2_8_76_160	231.9	0	-136.74
Etoposide_AML_90min_r2_8_76_161	231.9	-142.82	-52.68
Etoposide_AML_0min_r2_8_14_35	231.85	-142.82	-1
Etoposide_AML_0min_r2_8_14_26	231.85	-142.82	-1
Etoposide_AML_0min_r2_2_9_25	231.84	0	-129.58
Etoposide_AML_0min_r2_2_9_19	231.84	-142.82	-1
Etoposide_AML_90min_r2_6_15_28	231.5	0	-328.17
Etoposide_AML_90min_r2_6_15_32	231.5	0	-228.92
Etoposide_AML_90min_r2_2_35_109	231.27	-142.82	-190.32
Etoposide_AML_90min_r2_2_35_89	231.27	-142.82	-1
Etoposide_AML_90min_r2_3_66_150	231.21	-428.46	-322.47
Etoposide_AML_90min_r2_3_66_170	231.21	0	-154.63
Etoposide_AML_90min_r2_9_72_167	230.76	-142.82	-274.22
Etoposide_AML_90min_r2_9_72_159	230.76	-142.82	-200.48
Etoposide_AML_180min_r2_10_47_141	230.42	0	-144.12
Etoposide_AML_180min_r2_10_47_100	230.42	0	-44.23
Etoposide_AML_0min_r2_8_46_94	230.21	0	-112.08
Etoposide_AML_0min_r2_8_46_113	230.21	0	-1
Etoposide_AML_90min_r2_9_28_73	230.02	-142.82	-1
Etoposide_AML_90min_r2_9_28_69	230.02	-142.82	-1
Etoposide_AML_180min_r2_06_8_26	230.01	0	-316.41
Etoposide_AML_180min_r2_06_8_18	230.01	0	-310.53
Etoposide_AML_0min_r2_8_58_142	229.56	0	-194.6
Etoposide_AML_0min_r2_8_58_121	229.56	-142.82	-12.6
Etoposide_AML_0min_r2_2_78_207	229.44	-142.82	-345.47
Etoposide_AML_0min_r2_2_78_154	229.44	-142.82	-122.32
Etoposide_AML_0min_r2_7_63_121	229.4	-142.82	-263.77
Etoposide_AML_0min_r2_7_63_190	229.4	0	-193.37
Etoposide_AML_90min_r2_3_39_101	229.34	0	-354.2
Etoposide_AML_90min_r2_3_39_91	229.34	0	-240.68
Etoposide_AML_0min_r2_8_93_218	229.32	0	-329.14
Etoposide_AML_0min_r2_8_93_191	229.32	0	-292.82
Etoposide_AML_90min_r2_4_91_195	229.27	-142.82	-329.54
Etoposide_AML_90min_r2_6_89_181	229.27	-142.82	-279.75
Etoposide_AML_90min_r2_4_91_200	229.27	-142.82	-260.12
Etoposide_AML_90min_r2_6_89_196	229.27	-142.82	-128.84
Etoposide_AML_180min_r2_04_28_82	229.18	0	-1
Etoposide_AML_180min_r2_11_28_82	229.18	0	-1
Etoposide_AML_180min_r2_11_28_70	229.18	0	-1
Etoposide_AML_180min_r2_04_28_70	229.18	0	-1
Etoposide_AML_90min_r2_5_45_89	229.13	-142.82	-74.55
Etoposide_AML_90min_r2_5_45_106	229.13	0	1
Etoposide_AML_180min_r2_11_34_82	227.98	0	-245.16
Etoposide_AML_180min_r2_04_34_82	227.98	0	-245.16
Etoposide_AML_180min_r2_04_34_100	227.98	-142.82	-168.59
Etoposide_AML_180min_r2_11_34_100	227.98	-142.82	-168.59
Etoposide_AML_0min_r2_7_89_172	227.89	-142.82	-105.76
Etoposide_AML_0min_r2_7_89_257	227.89	-142.82	1
Etoposide_AML_90min_r2_1_84_177	227.63	-142.82	-221.26
Etoposide_AML_90min_r2_1_84_214	227.63	-142.82	-19.37
Etoposide_AML_90min_r2_4_79_170	227.56	0	-256.6
Etoposide_AML_90min_r2_4_79_174	227.56	0	-169.12
Etoposide_AML_0min_r2_6_78_227	227.39	-142.82	-1
Etoposide_AML_0min_r2_6_78_163	227.39	-142.82	-1
Etoposide_AML_180min_r2_08_39_80	226.55	-142.82	-266.57
Etoposide_AML_180min_r2_08_39_103	226.55	-142.82	-19.56
Etoposide_AML_90min_r2_6_76_167	226.5	-142.82	-332.11
Etoposide_AML_90min_r2_6_76_155	226.5	-142.82	-112.43
Etoposide_AML_180min_r2_11_11_31	226.41	0	-176.73
Etoposide_AML_180min_r2_04_11_31	226.41	0	-176.73
Etoposide_AML_180min_r2_11_11_39	226.41	0	-1.77
Etoposide_AML_180min_r2_04_11_39	226.41	0	-1.77
Etoposide_AML_90min_r2_7_38_87	226.15	0	-325.4
Etoposide_AML_90min_r2_7_38_91	226.15	0	-100.89
Etoposide_AML_180min_r2_05_0_0	225.88	-142.82	-257.28
Etoposide_AML_180min_r2_05_0_1	225.88	-142.82	-253.58
Etoposide_AML_180min_r2_05_15_36	225.8	-142.82	-323.59
Etoposide_AML_180min_r2_05_15_28	225.8	-142.82	-1
Etoposide_AML_90min_r2_4_55_128	225.63	0	-330.63
Etoposide_AML_90min_r2_4_55_120	225.63	-142.82	-1
Etoposide_AML_90min_r2_9_19_47	225.57	-142.82	-326.37
Etoposide_AML_90min_r2_9_19_50	225.57	-142.82	-268.31
Etoposide_AML_0min_r2_1_82_180	225.24	0	-276.61
Etoposide_AML_0min_r2_1_82_222	225.24	0	-167.54
Etoposide_AML_0min_r2_2_12_24	225.2	-142.82	-268.68
Etoposide_AML_0min_r2_2_12_31	225.2	-142.82	-234.12
Etoposide_AML_180min_r2_07_67_162	224.86	0	-56.45
Etoposide_AML_180min_r2_07_67_139	224.86	0	-1
Etoposide_AML_180min_r2_02_51_96	224.63	-142.82	-1
Etoposide_AML_180min_r2_02_51_98	224.63	-142.82	-1
Etoposide_AML_180min_r2_02_40_83	224.49	0	-249.58
Etoposide_AML_180min_r2_02_40_85	224.49	0	-60.66
Etoposide_AML_90min_r2_9_53_127	224.25	-142.82	-341.43
Etoposide_AML_90min_r2_9_53_127	224.25	-142.82	-211.98
Etoposide_AML_90min_r2_3_39_102	224.24	-142.82	-357.13
Etoposide_AML_90min_r2_3_39_92	224.24	-142.82	-233.52
Etoposide_AML_90min_r2_3_65_147	224.18	-142.82	-201.94
Etoposide_AML_90min_r2_3_65_167	224.18	-142.82	-174.26
Etoposide_AML_90min_r2_6_85_188	224.05	0	-344.64
Etoposide_AML_90min_r2_6_85_174	224.05	-142.82	-215.41
Etoposide_AML_90min_r2_3_3_7	223.99	-142.82	-1
Etoposide_AML_90min_r2_3_3_5	223.99	-142.82	-1
Etoposide_AML_90min_r2_3_88_200	223.97	0	-1
Etoposide_AML_90min_r2_3_88_225	223.97	-142.82	-1
Etoposide_AML_180min_r2_05_12_23	223.96	-142.82	-191.63
Etoposide_AML_180min_r2_05_12_30	223.96	-142.82	-103.77
Etoposide_AML_180min_r2_06_8_17	223.26	-142.82	-243.75
Etoposide_AML_180min_r2_06_8_25	223.26	-142.82	-132.56
Etoposide_AML_90min_r2_3_92_234	223.05	0	-148.69
Etoposide_AML_90min_r2_3_92_208	223.05	0	-74.79
Etoposide_AML_0min_r2_8_58_122	222.92	-142.82	-223.96
Etoposide_AML_0min_r2_8_58_143	222.92	-142.82	-165.76
Etoposide_AML_0min_r2_2_46_126	222.41	0	-100.11
Etoposide_AML_0min_r2_2_46_92	222.41	-142.82	-44.18
Etoposide_AML_0min_r2_8_91_187	222.35	-142.82	-312.73
Etoposide_AML_0min_r2_8_91_213	222.35	-142.82	-201.28
Etoposide_AML_90min_r2_4_80_176	222.16	0	-143.5
Etoposide_AML_90min_r2_4_80_171	222.16	0	-26.43
Etoposide_AML_180min_r2_04_12_33	222.12	0	-267.5
Etoposide_AML_180min_r2_11_12_33	222.12	0	-267.5
Etoposide_AML_180min_r2_04_12_41	222.12	0	-1
Etoposide_AML_180min_r2_11_12_41	222.12	0	-1
Etoposide_AML_0min_r2_2_75_150	221.99	-142.82	-128.62
Etoposide_AML_0min_r2_2_75_200	221.99	-142.82	-81.04
Etoposide_AML_0min_r2_3_76_164	221.93	-142.82	-296.13
Etoposide_AML_0min_r2_3_76_208	221.93	0	-264.35
Etoposide_AML_180min_r2_10_44_94	221.83	0	-347.29
Etoposide_AML_180min_r2_10_44_132	221.83	0	-184.48
Etoposide_AML_90min_r2_2_17_60	221.81	-142.82	-276.04
Etoposide_AML_90min_r2_2_17_49	221.81	-142.82	-267.89
Etoposide_AML_180min_r2_10_54_160	221.78	0	-285.34
Etoposide_AML_180min_r2_10_54_114	221.78	0	-257.79
Etoposide_AML_0min_r2_1_74_206	221.62	0	-335.59
Etoposide_AML_0min_r2_1_74_164	221.62	0	-200.37
Etoposide_AML_0min_r2_7_64_192	221.45	0	-226.29
Etoposide_AML_0min_r2_7_64_124	221.45	-142.82	-176.07
Etoposide_AML_0min_r2_4_52_172	221.01	0	-276.78
Etoposide_AML_0min_r2_4_52_120	221.01	0	1
Etoposide_AML_180min_r2_03_16_48	220.43	-142.82	-160.34
Etoposide_AML_180min_r2_03_16_34	220.43	-142.82	-36.61
Etoposide_AML_0min_r2_1_52_117	220.23	-142.82	-221
Etoposide_AML_0min_r2_1_52_141	220.23	-142.82	-1
Etoposide_AML_180min_r2_07_47_101	220.04	0	-322.27
Etoposide_AML_180min_r2_07_47_120	220.04	0	-266.37
Etoposide_AML_90min_r2_8_28_67	219.84	0	-132.9
Etoposide_AML_90min_r2_8_28_65	219.84	0	-40.11
Etoposide_AML_0min_r2_1_20_53	219.78	-142.82	-1
Etoposide_AML_0min_r2_1_20_47	219.78	-142.82	-1
Etoposide_AML_0min_r2_4_77_168	219.54	-142.82	-243.29
Etoposide_AML_0min_r2_4_77_240	219.54	-142.82	-106.63
Etoposide_AML_0min_r2_7_68_203	219.05	0	-352.47
Etoposide_AML_0min_r2_7_68_133	219.05	0	-347.43
Etoposide_AML_90min_r2_5_43_86	218.96	0	-203.52
Etoposide_AML_90min_r2_5_43_102	218.96	0	-69.03
Etoposide_AML_90min_r2_5_51_102	218.93	-142.82	-335.77
Etoposide_AML_90min_r2_5_51_122	218.93	-142.82	-179.54
Etoposide_AML_180min_r2_10_63_184	218.86	-142.82	-206.79
Etoposide_AML_180min_r2_10_63_133	218.86	-142.82	-13.6
Etoposide_AML_180min_r2_05_53_107	218.8	0	-229.14
Etoposide_AML_180min_r2_05_53_140	218.8	0	-68.86
Etoposide_AML_180min_r2_08_16_45	218.78	-142.82	-119.43
Etoposide_AML_180min_r2_08_16_35	218.78	-142.82	-53.8
Etoposide_AML_180min_r2_03_54_118	218.67	-142.82	-189.7
Etoposide_AML_180min_r2_03_54_162	218.67	-142.82	-141.34
Etoposide_AML_90min_r2_1_79_203	218.29	-142.82	-21.87
Etoposide_AML_90min_r2_1_79_168	218.29	-142.82	-1
Etoposide_AML_90min_r2_7_81_179	217.81	-142.82	-101.2
Etoposide_AML_90min_r2_7_81_173	217.81	0	-4.62
Etoposide_AML_0min_r2_8_70_172	217.61	0	-1
Etoposide_AML_0min_r2_8_70_146	217.61	0	-1
Etoposide_AML_90min_r2_2_78_220	216.8	0	-1
Etoposide_AML_90min_r2_2_78_182	216.8	-142.82	-1
Etoposide_AML_90min_r2_5_59_121	216.76	0	-341.14
Etoposide_AML_90min_r2_5_59_140	216.76	0	-317.21
Etoposide_AML_180min_r2_04_34_99	216.65	0	-188.19
Etoposide_AML_180min_r2_11_34_99	216.65	0	-188.19
Etoposide_AML_180min_r2_11_34_83	216.65	-142.82	-18.13
Etoposide_AML_180min_r2_04_34_83	216.65	-142.82	-18.13
Etoposide_AML_90min_r2_5_54_131	216.22	-142.82	-184.57
Etoposide_AML_90min_r2_5_54_110	216.22	0	-22.98
Etoposide_AML_90min_r2_3_60_155	216.13	0	-173.94
Etoposide_AML_90min_r2_3_60_136	216.13	-142.82	-33.03
Etoposide_AML_180min_r2_05_70_133	216.11	-428.46	-96.86
Etoposide_AML_180min_r2_05_70_167	216.11	-428.46	1
Etoposide_AML_180min_r2_10_70_195	215.85	0	-344.63
Etoposide_AML_180min_r2_10_70_142	215.85	0	-68.94
Etoposide_AML_0min_r2_3_29_83	215.8	0	-264.17
Etoposide_AML_0min_r2_3_29_70	215.8	0	-49.43
Etoposide_AML_0min_r2_1_17_45	215.73	-142.82	-317.85
Etoposide_AML_0min_r2_1_17_42	215.73	-142.82	-106.11
Etoposide_AML_180min_r2_05_36_94	215.42	-142.82	-113.68
Etoposide_AML_180min_r2_05_36_72	215.42	-142.82	-0.83
Etoposide_AML_90min_r2_8_55_122	215.4	0	-216.13
Etoposide_AML_90min_r2_8_55_118	215.4	0	-160.58
Etoposide_AML_0min_r2_3_78_168	215.1	0	-272.65
Etoposide_AML_0min_r2_3_78_212	215.1	0	-214.01
Etoposide_AML_0min_r2_4_18_55	214.74	0	-135.39
Etoposide_AML_0min_r2_4_18_34	214.74	-142.82	-1.2
Etoposide_AML_90min_r2_8_96_200	214.71	0	-274.17
Etoposide_AML_90min_r2_8_96_200	214.71	-142.82	-168.82
Etoposide_AML_90min_r2_9_19_51	214.32	0	-1
Etoposide_AML_90min_r2_9_19_48	214.32	0	-1
Etoposide_AML_0min_r2_2_29_85	214.06	-142.82	-1
Etoposide_AML_0min_r2_2_29_58	214.06	-142.82	-1
Etoposide_AML_0min_r2_6_46_97	213.6	-142.82	-370.85
Etoposide_AML_0min_r2_6_46_140	213.6	-142.82	-251.21
Etoposide_AML_90min_r2_7_54_122	213.45	-142.82	-327.34
Etoposide_AML_90min_r2_7_54_123	213.45	-142.82	-180.04
Etoposide_AML_0min_r2_8_73_152	213.38	-142.82	-328.6
Etoposide_AML_0min_r2_8_73_179	213.38	-142.82	-135.92
Etoposide_AML_180min_r2_02_24_49	213.09	0	-253.75
Etoposide_AML_180min_r2_02_24_53	213.09	0	-88.64
Etoposide_AML_90min_r2_4_74_163	213.01	0	-303.26
Etoposide_AML_90min_r2_4_74_157	213.01	0	-162.32
Etoposide_AML_90min_r2_4_95_208	212.89	0	-1
Etoposide_AML_90min_r2_4_95_202	212.89	0	-1
Etoposide_AML_180min_r2_05_89_176	212.82	-142.82	-248.73
Etoposide_AML_180min_r2_05_89_148	212.82	-142.82	-239.16
Etoposide_AML_0min_r2_1_80_176	212.67	-142.82	-348.75
Etoposide_AML_0min_r2_1_80_219	212.67	-142.82	-334.17
Etoposide_AML_90min_r2_2_92_260	212.37	-142.82	-133.52
Etoposide_AML_90min_r2_2_92_216	212.37	-142.82	-62.86
Etoposide_AML_0min_r2_2_75_149	212.08	0	-339.68
Etoposide_AML_0min_r2_2_75_199	212.08	-285.64	-328.95
Etoposide_AML_90min_r2_8_8_21	211.96	0	-246.85
Etoposide_AML_90min_r2_8_8_20	211.96	0	-130.29
Etoposide_AML_180min_r2_09_52_135	211.63	0	-313.83
Etoposide_AML_180min_r2_09_52_106	211.63	0	-173.29
Etoposide_AML_0min_r2_6_93_265	211.54	-142.82	-320.43
Etoposide_AML_0min_r2_6_93_190	211.54	-142.82	-300.4
Etoposide_AML_90min_r2_6_84_171	211.5	-142.82	-341.64
Etoposide_AML_90min_r2_6_84_185	211.5	-142.82	-332.85
Etoposide_AML_180min_r2_06_22_62	211.38	-142.82	-313.85
Etoposide_AML_180min_r2_06_22_43	211.38	-142.82	-11.53
Etoposide_AML_90min_r2_2_75_176	210.59	-428.46	-219.65
Etoposide_AML_90min_r2_2_75_215	210.59	-428.46	-186.42
Etoposide_AML_90min_r2_2_8_29	210.31	-142.82	-1
Etoposide_AML_90min_r2_2_8_22	210.31	-142.82	-1
Etoposide_AML_90min_r2_9_68_161	210.21	0	-295.06
Etoposide_AML_90min_r2_9_68_154	210.21	0	-225.97
Etoposide_AML_90min_r2_4_96_210	210.18	0	-211.39
Etoposide_AML_90min_r2_4_96_205	210.18	0	-76.34
Etoposide_AML_0min_r2_8_79_192	210.01	-142.82	-279.91
Etoposide_AML_0min_r2_8_79_166	210.01	-142.82	-255.4
Etoposide_AML_180min_r2_02_3_7	208.95	-285.64	-168.77
Etoposide_AML_180min_r2_02_3_7	208.95	-428.46	-87.75
Etoposide_AML_0min_r2_4_76_166	208.53	0	-377
Etoposide_AML_0min_r2_4_76_239	208.53	-142.82	-38.4
Etoposide_AML_0min_r2_8_53_131	208.1	0	-316.94
Etoposide_AML_0min_r2_8_53_112	208.1	0	-238.2
Etoposide_AML_90min_r2_1_3_6	207.56	0	-270.16
Etoposide_AML_90min_r2_1_3_4	207.56	0	-177.41
Etoposide_AML_0min_r2_8_56_119	207.55	0	-1
Etoposide_AML_0min_r2_8_56_139	207.55	-142.82	-1
Etoposide_AML_90min_r2_4_34_70	207.44	0	-353.41
Etoposide_AML_90min_r2_4_34_78	207.44	0	-251.73
Etoposide_AML_0min_r2_3_14_37	207.39	0	-78.98
Etoposide_AML_0min_r2_3_14_34	207.39	-142.82	-22.84
Etoposide_AML_0min_r2_8_49_120	207.25	-142.82	-250.47
Etoposide_AML_0min_r2_8_49_102	207.25	-142.82	-111.02
Etoposide_AML_90min_r2_8_48_105	207.04	0	-138.52
Etoposide_AML_90min_r2_8_48_106	207.04	0	-43.87
Etoposide_AML_90min_r2_2_75_214	206.93	0	-368.68
Etoposide_AML_90min_r2_2_75_175	206.93	-142.82	-313.08
Etoposide_AML_0min_r2_8_28_69	206.83	-142.82	-288.42
Etoposide_AML_0min_r2_8_28_58	206.83	-142.82	-161.11
Etoposide_AML_90min_r2_1_88_224	206.68	0	-1
Etoposide_AML_90min_r2_1_88_185	206.68	0	-1
Etoposide_AML_90min_r2_4_26_57	206.33	0	-1
Etoposide_AML_90min_r2_4_26_51	206.33	0	-1
Etoposide_AML_90min_r2_3_98_219	206.25	-142.82	-96.11
Etoposide_AML_90min_r2_3_98_247	206.25	-142.82	-41.76
Etoposide_AML_90min_r2_5_84_190	206.2	0	-112.03
Etoposide_AML_90min_r2_5_84_169	206.2	-285.64	-14.31
Etoposide_AML_180min_r2_06_50_135	206.12	0	-293.24
Etoposide_AML_180min_r2_06_50_98	206.12	-142.82	-137.78
Etoposide_AML_180min_r2_08_24_50	205.98	-142.82	-131.87
Etoposide_AML_180min_r2_08_24_64	205.98	-142.82	-69.52
Etoposide_AML_90min_r2_3_93_236	205.68	-142.82	-110.87
Etoposide_AML_90min_r2_3_93_209	205.68	-142.82	-26.8
Etoposide_AML_90min_r2_9_78_179	205.63	-142.82	-1
Etoposide_AML_90min_r2_9_78_174	205.63	-142.82	-1
Etoposide_AML_0min_r2_8_21_52	205.19	0	-176.19
Etoposide_AML_0min_r2_8_21_40	205.19	0	-26.55
Etoposide_AML_180min_r2_11_11_32	205.01	-142.82	-327.84
Etoposide_AML_180min_r2_04_11_32	205.01	-142.82	-327.84
Etoposide_AML_180min_r2_11_11_40	205.01	-142.82	-148.17
Etoposide_AML_180min_r2_04_11_40	205.01	-142.82	-148.17
Etoposide_AML_90min_r2_7_47_113	204.73	0	-1
Etoposide_AML_90min_r2_7_47_107	204.73	0	-1
Etoposide_AML_180min_r2_07_33_73	204.47	0	-365.11
Etoposide_AML_180min_r2_07_33_86	204.47	0	-209.54
Etoposide_AML_180min_r2_08_24_65	204.29	-142.82	-1
Etoposide_AML_180min_r2_08_24_49	204.29	-142.82	-1
Etoposide_AML_90min_r2_4_74_158	204.09	-142.82	-240.66
Etoposide_AML_90min_r2_4_74_164	204.09	-142.82	-152.19
Etoposide_AML_90min_r2_3_6_10	204.09	-142.82	-127.22
Etoposide_AML_90min_r2_3_6_13	204.09	0	1
Etoposide_AML_90min_r2_4_64_146	203.8	-142.82	-173.4
Etoposide_AML_90min_r2_4_64_139	203.8	-142.82	-51.08
Etoposide_AML_0min_r2_7_76_223	203.76	0	-1
Etoposide_AML_0min_r2_7_76_148	203.76	0	-1
Etoposide_AML_90min_r2_7_98_202	203.58	-142.82	-82.67
Etoposide_AML_90min_r2_7_98_212	203.58	-142.82	-79.05
Etoposide_AML_90min_r2_6_12_23	203.37	0	-215.52
Etoposide_AML_90min_r2_6_12_24	203.37	-428.46	1
Etoposide_AML_180min_r2_05_53_139	203.34	-142.82	-1
Etoposide_AML_180min_r2_05_53_106	203.34	-142.82	-1
Etoposide_AML_0min_r2_6_48_146	203.26	-142.82	-1
Etoposide_AML_0min_r2_6_48_102	203.26	-142.82	-1
Etoposide_AML_180min_r2_08_59_153	203.15	-142.82	-1
Etoposide_AML_180min_r2_08_59_122	203.15	-142.82	-1
Etoposide_AML_0min_r2_1_46_105	202.97	0	-250
Etoposide_AML_0min_r2_1_46_127	202.97	-142.82	-115.44
Etoposide_AML_90min_r2_3_54_125	202.33	0	-177.09
Etoposide_AML_90min_r2_3_54_142	202.33	0	-1
Etoposide_AML_90min_r2_7_88_193	202.3	0	-63.19
Etoposide_AML_90min_r2_7_88_187	202.3	0	-12.96
Etoposide_AML_90min_r2_2_96_269	202.14	0	-1
Etoposide_AML_90min_r2_2_96_222	202.14	0	-1
Etoposide_AML_90min_r2_2_17_59	202.12	-142.82	-276.8
Etoposide_AML_90min_r2_2_17_48	202.12	-142.82	-258.89
Etoposide_AML_90min_r2_6_69_140	201.7	-142.82	-324.27
Etoposide_AML_90min_r2_6_69_154	201.7	-142.82	-269.79
Etoposide_AML_90min_r2_9_23_55	201.62	0	-166.51
Etoposide_AML_90min_r2_9_23_60	201.62	0	-29.23
Etoposide_AML_90min_r2_9_97_214	201.55	0	-337.62
Etoposide_AML_90min_r2_9_97_216	201.55	0	-254.34
Etoposide_AML_180min_r2_05_11_22	200.95	-142.82	-310.81
Etoposide_AML_180min_r2_05_11_28	200.95	-142.82	-189.38
Etoposide_AML_90min_r2_6_6_13	200.48	-142.82	-107.85
Etoposide_AML_90min_r2_6_6_12	200.48	-142.82	-21.13
Etoposide_AML_0min_r2_6_53_156	199.59	0	-372.84
Etoposide_AML_0min_r2_6_53_109	199.59	-142.82	-334.15
Etoposide_AML_0min_r2_3_43_120	199.55	0	-1
Etoposide_AML_0min_r2_3_43_96	199.55	0	-1
Etoposide_AML_180min_r2_05_27_68	199.47	-142.82	-340.66
Etoposide_AML_180min_r2_05_27_51	199.47	-142.82	-314.49
Etoposide_AML_0min_r2_3_58_126	198.44	0	-183.99
Etoposide_AML_0min_r2_3_58_159	198.44	-142.82	-157.03
Etoposide_AML_90min_r2_3_95_239	198.18	0	-268.87
Etoposide_AML_90min_r2_3_95_212	198.18	-142.82	-207.58
Etoposide_AML_0min_r2_7_48_92	198.14	-142.82	-216.43
Etoposide_AML_0min_r2_7_48_143	198.14	-142.82	-209.84
Etoposide_AML_0min_r2_3_43_97	197.88	-142.82	-329.98
Etoposide_AML_0min_r2_3_43_119	197.88	0	-241.53
Etoposide_AML_90min_r2_7_97_201	197.66	0	-89.13
Etoposide_AML_90min_r2_7_97_209	197.66	0	-1
Etoposide_AML_0min_r2_6_29_91	197.5	0	-1
Etoposide_AML_0min_r2_6_29_64	197.5	-142.82	-1
Etoposide_AML_90min_r2_9_91_204	197.14	-142.82	-204.71
Etoposide_AML_90min_r2_9_91_201	197.14	-142.82	-185.2
Etoposide_AML_180min_r2_04_25_62	196.9	0	-299.81
Etoposide_AML_180min_r2_11_25_62	196.9	0	-299.81
Etoposide_AML_180min_r2_11_25_73	196.9	0	-278.22
Etoposide_AML_180min_r2_04_25_73	196.9	0	-278.22
Etoposide_AML_0min_r2_1_31_84	196.42	-142.82	-236.99
Etoposide_AML_0min_r2_1_31_71	196.42	-142.82	-94.21
Etoposide_AML_0min_r2_6_31_69	196.13	-142.82	-94.38
Etoposide_AML_0min_r2_6_31_97	196.13	0	-24.01
Etoposide_AML_0min_r2_4_18_35	196.05	-142.82	-160.58
Etoposide_AML_0min_r2_4_18_54	196.05	0	-33.36
Etoposide_AML_0min_r2_6_67_140	195.88	-142.82	-317.81
Etoposide_AML_0min_r2_6_67_198	195.88	-142.82	-137.76
Etoposide_AML_90min_r2_4_42_89	195.77	-142.82	-335.7
Etoposide_AML_90min_r2_4_42_97	195.77	-142.82	-195.72
Etoposide_AML_90min_r2_7_83_184	195.75	-142.82	-49.45
Etoposide_AML_90min_r2_7_83_178	195.75	-142.82	-30.12
Etoposide_AML_0min_r2_4_97_298	195.54	-142.82	-377.4
Etoposide_AML_0min_r2_4_97_208	195.54	-142.82	-302.05
Etoposide_AML_0min_r2_3_38_88	195.06	-142.82	-107.88
Etoposide_AML_0min_r2_3_38_105	195.06	-142.82	-32.23
Etoposide_AML_180min_r2_10_67_193	194.99	0	-1
Etoposide_AML_180min_r2_10_67_140	194.99	0	1
Etoposide_AML_90min_r2_2_83_194	194.49	-142.82	-297.03
Etoposide_AML_90min_r2_2_83_234	194.49	-142.82	-179.86
Etoposide_AML_90min_r2_9_72_168	194.43	-142.82	-293.02
Etoposide_AML_90min_r2_9_72_158	194.43	-142.82	-290.89
Etoposide_AML_0min_r2_2_14_38	194.3	-142.82	-118.64
Etoposide_AML_0min_r2_2_14_31	194.3	-142.82	-1
Etoposide_AML_0min_r2_8_49_103	193.85	-142.82	-158.17
Etoposide_AML_0min_r2_8_49_121	193.85	-142.82	-77.6
Etoposide_AML_90min_r2_4_32_75	193.71	0	-180.67
Etoposide_AML_90min_r2_4_32_67	193.71	0	-1.87
Etoposide_AML_0min_r2_2_95_189	193.57	-142.82	-90.48
Etoposide_AML_0min_r2_2_95_250	193.57	-142.82	-6.82
Etoposide_AML_180min_r2_05_44_115	193.29	0	1
Etoposide_AML_180min_r2_05_44_89	193.29	0	1
Etoposide_AML_0min_r2_2_45_89	193.02	-142.82	-322.99
Etoposide_AML_0min_r2_2_45_123	193.02	0	-322.59
Etoposide_AML_180min_r2_11_22_69	192.67	0	-264.64
Etoposide_AML_180min_r2_04_22_69	192.67	0	-264.64
Etoposide_AML_180min_r2_11_22_58	192.67	0	-1
Etoposide_AML_180min_r2_04_22_58	192.67	0	-1
Etoposide_AML_90min_r2_1_83_212	192.53	0	-98.49
Etoposide_AML_90min_r2_1_83_175	192.53	-142.82	-1.48
Etoposide_AML_90min_r2_9_23_59	192.45	-142.82	-171.25
Etoposide_AML_90min_r2_9_23_56	192.45	-142.82	-62.55
Etoposide_AML_180min_r2_05_11_21	192.2	-142.82	-267.65
Etoposide_AML_180min_r2_05_11_27	192.2	-142.82	-232.8
Etoposide_AML_90min_r2_7_64_149	192.19	0	-1
Etoposide_AML_90min_r2_7_64_143	192.19	0	-1
Etoposide_AML_0min_r2_3_12_33	192.12	0	-1
Etoposide_AML_0min_r2_3_12_31	192.12	0	-1
Etoposide_AML_90min_r2_2_69_165	192.02	0	-1
Etoposide_AML_90min_r2_2_69_202	192.02	-142.82	-1
Etoposide_AML_180min_r2_10_54_159	191.83	0	-134.86
Etoposide_AML_180min_r2_10_54_115	191.83	-142.82	-111.53
Etoposide_AML_90min_r2_8_81_173	191.65	-142.82	-12.59
Etoposide_AML_90min_r2_8_81_173	191.65	-142.82	-1
Etoposide_AML_90min_r2_3_9_19	191.63	-142.82	-1
Etoposide_AML_90min_r2_3_9_17	191.63	-142.82	-1
Etoposide_AML_0min_r2_1_45_102	191.55	0	-346.32
Etoposide_AML_0min_r2_1_45_126	191.55	-142.82	-281.63
Etoposide_AML_180min_r2_05_20_39	191.37	-142.82	-151.3
Etoposide_AML_180min_r2_05_20_47	191.37	-142.82	-86.01
Etoposide_AML_0min_r2_5_30_86	191.1	-142.82	-145.98
Etoposide_AML_0min_r2_5_30_60	191.1	-142.82	-40.43
Etoposide_AML_90min_r2_7_62_143	190.88	-142.82	-248.87
Etoposide_AML_90min_r2_7_62_138	190.88	-142.82	-83.92
Etoposide_AML_90min_r2_2_47_142	190.85	0	-1
Etoposide_AML_90min_r2_2_47_113	190.85	0	-1
Etoposide_AML_0min_r2_5_74_218	190.46	-142.82	-1
Etoposide_AML_0min_r2_5_74_147	190.46	-142.82	-1
Etoposide_AML_180min_r2_10_57_121	190.27	0	-346.6
Etoposide_AML_180min_r2_10_57_167	190.27	0	-182.01
Etoposide_AML_180min_r2_09_4_12	190.16	-142.82	-94.29
Etoposide_AML_180min_r2_09_4_10	190.16	0	-35.59
Etoposide_AML_90min_r2_7_49_116	189.82	-142.82	-82.45
Etoposide_AML_90min_r2_7_49_111	189.82	-142.82	-24.77
Etoposide_AML_180min_r2_02_31_67	189.74	-142.82	-1
Etoposide_AML_180min_r2_02_31_63	189.74	-142.82	-1
Etoposide_AML_0min_r2_6_37_81	189.59	0	-295.4
Etoposide_AML_0min_r2_6_37_115	189.59	0	-163.41
Etoposide_AML_0min_r2_7_87_169	189.34	-142.82	-386.36
Etoposide_AML_0min_r2_7_87_254	189.34	0	-348.63
Etoposide_AML_90min_r2_8_40_90	189.03	0	-159.6
Etoposide_AML_90min_r2_8_40_88	189.03	0	-23.34
Etoposide_AML_90min_r2_4_45_105	188.97	0	-1
Etoposide_AML_90min_r2_4_45_98	188.97	0	-1
Etoposide_AML_90min_r2_3_74_189	188.37	-142.82	-251.97
Etoposide_AML_90min_r2_3_74_168	188.37	-142.82	-18.7
Etoposide_AML_0min_r2_6_43_133	188.09	-142.82	-1
Etoposide_AML_0min_r2_6_43_92	188.09	-142.82	-1
Etoposide_AML_0min_r2_2_80_211	187.95	-142.82	-362.11
Etoposide_AML_0min_r2_2_80_158	187.95	-142.82	-357.04
Etoposide_AML_0min_r2_5_50_103	187.9	-142.82	-316.7
Etoposide_AML_0min_r2_5_50_148	187.9	-142.82	-138.52
Etoposide_AML_0min_r2_6_78_162	186.95	-142.82	-269.39
Etoposide_AML_0min_r2_6_78_226	186.95	0	-253.88
Etoposide_AML_180min_r2_11_44_126	186.71	0	-1
Etoposide_AML_180min_r2_04_44_126	186.71	0	-1
Etoposide_AML_180min_r2_04_44_102	186.71	0	-1
[truncated: 831 more rows]

## Sheet: control_1
Signal number	physical_distance	ellipsoid_distance	distance_to_surface
Etoposide_AML_control_2_12_35	1361.44	-142.82	-1
Etoposide_AML_control_2_12_193	1361.44	0	-1
Etoposide_AML_control_4_63_143	837.23	0	-265.52
Etoposide_AML_control_4_63_129	837.23	-142.82	-326.11
Etoposide_AML_control_5_97_238	768.2	-142.82	-1
Etoposide_AML_control_5_97_198	768.2	0	-1
Etoposide_AML_control_7_72_205	767	0	-78.44
Etoposide_AML_control_7_72_147	767	0	-275.93
Etoposide_AML_control_2_64_165	754.29	-142.82	-266.85
Etoposide_AML_control_2_64_128	754.29	-142.82	-319.85
Etoposide_AML_control_4_75_170	734.93	0	-244.04
Etoposide_AML_control_4_75_152	734.93	-142.82	-351.09
Etoposide_AML_control_2_47_91	724.89	-142.82	-249.84
Etoposide_AML_control_2_47_124	724.89	0	-267.42
Etoposide_AML_control_6_92_188	680.9	0	-1
Etoposide_AML_control_6_92_224	680.9	0	-288.57
Etoposide_AML_control_2_17_45	670.59	0	-257.95
Etoposide_AML_control_2_17_32	670.59	-285.64	-370.27
Etoposide_AML_control_5_48_121	651	0	-99.73
Etoposide_AML_control_5_48_96	651	-142.82	-250.39
Etoposide_AML_control_6_84_171	640.69	0	-1
Etoposide_AML_control_6_84_206	640.69	-142.82	-112.13
Etoposide_AML_control_7_9_25	633.76	0	-148.52
Etoposide_AML_control_7_9_18	633.76	-142.82	-224.12
Etoposide_AML_control_1_33_62	601.85	0	-91.19
Etoposide_AML_control_1_33_93	601.85	-142.82	-371.8
Etoposide_AML_control_2_45_87	582.13	0	-98.63
Etoposide_AML_control_2_45_118	582.13	-142.82	-378.59
Etoposide_AML_control_4_26_57	581.47	0	-118.9
Etoposide_AML_control_4_26_61	581.47	0	-371.12
Etoposide_AML_control_4_48_99	579.84	0	-258.48
Etoposide_AML_control_4_48_109	579.84	0	-371.26
Etoposide_AML_control_6_90_219	574.04	-428.46	-288.65
Etoposide_AML_control_6_90_183	574.04	0	-365.99
Etoposide_AML_control_3_14_23	572.22	0	-12.44
Etoposide_AML_control_3_14_35	572.22	-142.82	-248.76
Etoposide_AML_control_6_77_188	558.01	-142.82	-25.98
Etoposide_AML_control_6_77_157	558.01	-142.82	-296.18
Etoposide_AML_control_3_65_173	549.97	0	-65.48
Etoposide_AML_control_3_65_125	549.97	-142.82	-254.77
Etoposide_AML_control_3_96_256	546.06	0	-1
Etoposide_AML_control_3_96_185	546.06	-142.82	-263.14
Etoposide_AML_control_6_88_214	535.02	-142.82	-267.32
Etoposide_AML_control_6_88_180	535.02	-142.82	-284.59
Etoposide_AML_control_4_31_67	534.43	0	-153.52
Etoposide_AML_control_4_31_72	534.43	0	-246.57
Etoposide_AML_control_5_54_135	533.8	142.82	282.69
Etoposide_AML_control_5_54_110	533.8	0	-164.17
Etoposide_AML_control_6_59_120	531.68	0	-15.06
Etoposide_AML_control_6_59_146	531.68	-142.82	-282.04
Etoposide_AML_control_6_47_97	531.48	0	-145.41
Etoposide_AML_control_6_47_118	531.48	0	-217.19
Etoposide_AML_control_7_98_203	525.12	-142.82	349.85
Etoposide_AML_control_7_98_273	525.12	-142.82	34.7
Etoposide_AML_control_6_52_130	518.53	-142.82	-25.18
Etoposide_AML_control_6_52_108	518.53	-142.82	-213.36
Etoposide_AML_control_4_37_78	513.57	-142.82	-143.49
Etoposide_AML_control_4_37_84	513.57	0	-270.37
Etoposide_AML_control_3_87_167	500.99	-142.82	-1
Etoposide_AML_control_3_87_231	500.99	-142.82	-132.45
Etoposide_AML_control_5_87_177	500.29	0	-226.17
Etoposide_AML_control_5_87_215	500.29	0	-272.34
Etoposide_AML_control_7_78_161	499.73	0	-157.12
Etoposide_AML_control_7_78_219	499.73	0	-185.37
Etoposide_AML_control_6_96_234	497.34	-142.82	-331.45
Etoposide_AML_control_6_96_196	497.34	-142.82	-333.62
Etoposide_AML_control_5_56_139	494.15	0	1
Etoposide_AML_control_5_56_114	494.15	0	-1
Etoposide_AML_control_2_27_70	491.55	-142.82	-22.1
Etoposide_AML_control_2_27_51	491.55	-142.82	-369.7
Etoposide_AML_control_5_37_95	489.76	0	-109.54
Etoposide_AML_control_5_37_74	489.76	0	-273.52
Etoposide_AML_control_3_59_160	487.14	0	-19.03
Etoposide_AML_control_3_59_113	487.14	0	-322.2
Etoposide_AML_control_2_33_85	483.21	-142.82	-1
Etoposide_AML_control_2_33_64	483.21	-142.82	-1
Etoposide_AML_control_4_9_22	482.39	0	-12.12
Etoposide_AML_control_4_9_22	482.39	-142.82	-38.45
Etoposide_AML_control_2_58_151	479.36	0	-29.64
Etoposide_AML_control_2_58_116	479.36	-142.82	-261.9
Etoposide_AML_control_5_37_94	475.88	0	-80.58
[truncated: 941 more rows]

## Sheet: control_2
Signal number	physical_distance	ellipsoid_distance	distance_to_surface
[truncated: 932 more rows]
