# Supplementary material for: Recurrent Translocations in Topoisomerase Inhibitor-Related Leukemia Are Determined by the Features of DNA Breaks Rather Than by the Proximity of the Translocating Genes
Source: Int J Mol Sci. 2022 Aug 29;23(17):9824. doi: 10.3390/ijms23179824 (PMC9456246; doi:10.3390/ijms23179824)
Supplement: Supplementary file 1 [file ijms-23-09824-s001.zip › Table S2. FISH AML1 localization statistic.xlsx]

## Sheet: Лист1
							etoposid-treated
	exp R1		exp R2				non-broken	«broken»	% of «broken»	% outside
outside	22	3	19	2		outside	41	5		non-broken	«broken»
inside	2296	71	2675	134		inside	4971	205	0.0402145	0.00818037	0.0238095	2.91057
							5012	210
							non-treated
	control R1		control R2				non-broken	«broken»	% of «broken»	% outside
outside	5	0	3	0		outside	8	0		non-broken	«broken»
inside	1003	14	923	6		inside	1926	20	0.0102354	0.0041365	—	5.75595
							1934	20
							Chi-squared test
							n-b in exp	br in exp
							41	5	44.1501	1.84987
							4971	205	4967.85	208.15
							5012	210	5012	210
						P	0.00880889
									Chi-square		p value =0,05
							0.224764	5.36436	5.63879	>	3.84146
							0.00199751	0.047674
							control	br in exp
							8	5	11.7267	1.27332
							1926	205	1922.27	208.727
							1934	210	1934	210
						P	0.00606343
									Chi-square		p value =0,001
							1.18432	10.907	12.1651	>	10.8276
							0.00722485	0.0665374
