# Supplementary material for: Recurrent Translocations in Topoisomerase Inhibitor-Related Leukemia Are Determined by the Features of DNA Breaks Rather Than by the Proximity of the Translocating Genes
Source: Int J Mol Sci. 2022 Aug 29;23(17):9824. doi: 10.3390/ijms23179824 (PMC9456246; doi:10.3390/ijms23179824)
Supplement: Supplementary file 1 [file ijms-23-09824-s001.zip › Table S3. 4C-seq data.xlsx]

## Sheet: AML1
	chr	start	end	id	E1	AML1_с1	AML1_с2	AML1_e1	AML1_e2	AML1_с1_norm	AML1_с2_norm	AML1_e1_norm	AML1_e2_norm
3	chr1	1000000	1500000	4	1.01074	1	1	25	7	0.0988743	0.104967	3.57184	0.789609
4	chr1	1500000	2000000	5	0.888959	0	5	4	0	0	0.524834	0.571495	0
5	chr1	2000000	2500000	6	0.672528	0	2	99	222	0	0.209934	14.1445	25.0419
6	chr1	2500000	3000000	7	0.33123	14	0	2	12	1.38424	0	0.285748	1.35362
7	chr1	3000000	3500000	8	0.292534	2	1	3	1	0.197749	0.104967	0.428621	0.112801
8	chr1	3500000	4000000	9	0.429705	138	74	0	0	13.6447	7.76754	0	0
9	chr1	4000000	4500000	10	-0.096685	161	0	210	1	15.9188	0	30.0035	0.112801
10	chr1	4500000	5000000	11	-0.169492	0	1	2	1	0	0.104967	0.285748	0.112801
11	chr1	5000000	5500000	12	-0.195987	188	1675	113	1	18.5884	175.819	16.1447	0.112801
12	chr1	5500000	6000000	13	-0.0136727	1	1	8	7	0.0988743	0.104967	1.14299	0.789609
13	chr1	6000000	6500000	14	0.568552	444	0	26	1812	43.9002	0	3.71472	204.396
14	chr1	6500000	7000000	15	0.698331	73	43	90	0	7.21783	4.51357	12.8586	0
15	chr1	7000000	7500000	16	0.212718	4	0	155	2	0.395497	0	22.1454	0.225603
16	chr1	7500000	8000000	17	0.325646	0	28	38	1	0	2.93907	5.4292	0.112801
17	chr1	8000000	8500000	18	0.547157	42	2	365	1569	4.15272	0.209934	52.1489	176.985
18	chr1	8500000	9000000	19	0.783666	13	4	371	1	1.28537	0.419867	53.0062	0.112801
19	chr1	9000000	9500000	20	0.858813	1	0	32	1	0.0988743	0	4.57196	0.112801
20	chr1	9500000	10000000	21	0.871187	8	748	1	8	0.790995	78.5152	0.142874	0.902411
21	chr1	10000000	10500000	22	0.846768	18	2	80	0	1.77974	0.209934	11.4299	0
22	chr1	10500000	11000000	23	0.780394	147	0	68	1	14.5345	0	9.71542	0.112801
23	chr1	11000000	11500000	24	0.855664	8	2	168	206	0.790995	0.209934	24.0028	23.2371
24	chr1	11500000	12000000	25	0.837503	3	53	40	1	0.296623	5.56324	5.71495	0.112801
25	chr1	12000000	12500000	26	0.863261	48	87	80	4	4.74597	9.13211	11.4299	0.451205
26	chr1	12500000	13000000	27	0.53894	51	358	67	14	5.04259	37.5781	9.57254	1.57922
29	chr1	14000000	14500000	30	0.388903	919	2	27	458	90.8655	0.209934	3.85759	51.663
30	chr1	14500000	15000000	31	0.52086	99	2	351	285	9.78856	0.209934	50.1487	32.1484
31	chr1	15000000	15500000	32	0.370221	19	1	128	1	1.87861	0.104967	18.2878	0.112801
32	chr1	15500000	16000000	33	0.708508	0	3	42	1011	0	0.3149	6.0007	114.042
33	chr1	16000000	16500000	34	0.89781	139	0	301	0	13.7435	0	43.005	0
34	chr1	16500000	17000000	35	0.913539	625	25	95	85	61.7965	2.62417	13.573	9.58811
35	chr1	17000000	17500000	36	0.799933	1	22	29	1	0.0988743	2.30927	4.14334	0.112801
36	chr1	17500000	18000000	37	0.474801	0	0	32	999	0	0	4.57196	112.689
37	chr1	18000000	18500000	38	0.273227	4	246	178	0	0.395497	25.8218	25.4315	0
38	chr1	18500000	19000000	39	0.334385	4	7	2	20	0.395497	0.734768	0.285748	2.25603
39	chr1	19000000	19500000	40	0.551466	34	0	15	1	3.36173	0	2.14311	0.112801
40	chr1	19500000	20000000	41	0.745647	73	20	114	0	7.21783	2.09934	16.2876	0
41	chr1	20000000	20500000	42	0.438666	0	2	189	16	0	0.209934	27.0031	1.80482
42	chr1	20500000	21000000	43	0.517753	0	0	199	1	0	0	28.4319	0.112801
43	chr1	21000000	21500000	44	0.762002	2	2	67	1258	0.197749	0.209934	9.57254	141.904
44	chr1	21500000	22000000	45	0.642504	0	0	1	0	0	0	0.142874	0
45	chr1	22000000	22500000	46	0.660279	2	2	20	0	0.197749	0.209934	2.85748	0
46	chr1	22500000	23000000	47	0.538033	8	0	3	1	0.790995	0	0.428621	0.112801
47	chr1	23000000	23500000	48	0.577669	32	0	245	0	3.16398	0	35.0041	0
48	chr1	23500000	24000000	49	0.78042	100	2	57	1	9.88743	0.209934	8.1438	0.112801
49	chr1	24000000	24500000	50	0.734632	1	3	28	0	0.0988743	0.3149	4.00047	0
50	chr1	24500000	25000000	51	0.679499	158	2	74	16	15.6221	0.209934	10.5727	1.80482
51	chr1	25000000	25500000	52	0.760961	0	0	41	0	0	0	5.85782	0
52	chr1	25500000	26000000	53	0.743148	20	2	1	1	1.97749	0.209934	0.142874	0.112801
53	chr1	26000000	26500000	54	0.782583	79	11	4	8	7.81107	1.15463	0.571495	0.902411
54	chr1	26500000	27000000	55	0.802569	2	43	50	0	0.197749	4.51357	7.14369	0
55	chr1	27000000	27500000	56	0.770478	376	0	0	1	37.1768	0	0	0.112801
56	chr1	27500000	28000000	57	0.762438	0	746	0	408	0	78.3052	0	46.0229
57	chr1	28000000	28500000	58	0.684596	22	0	0	11	2.17524	0	0	1.24081
58	chr1	28500000	29000000	59	0.713653	1	0	209	0	0.0988743	0	29.8606	0
59	chr1	29000000	29500000	60	0.587792	448	34	7	2	44.2957	3.56887	1.00012	0.225603
60	chr1	29500000	30000000	61	0.392351	1	0	0	0	0.0988743	0	0	0
61	chr1	30000000	30500000	62	0.263907	0	0	127	3	0	0	18.145	0.338404
62	chr1	30500000	31000000	63	0.228615	51	10	12	4	5.04259	1.04967	1.71449	0.451205
63	chr1	31000000	31500000	64	0.463758	46	0	49	4	4.54822	0	7.00081	0.451205
64	chr1	31500000	32000000	65	0.659847	49	4	264	2	4.84484	0.419867	37.7187	0.225603
65	chr1	32000000	32500000	66	0.754872	100	0	58	2	9.88743	0	8.28668	0.225603
66	chr1	32500000	33000000	67	0.751556	10	0	309	109	0.988743	0	44.148	12.2953
67	chr1	33000000	33500000	68	0.715244	88	19	75	19	8.70094	1.99437	10.7155	2.14323
68	chr1	33500000	34000000	69	0.590154	58	1	21	1683	5.73471	0.104967	3.00035	189.845
69	chr1	34000000	34500000	70	0.113685	8	3	1	5	0.790995	0.3149	0.142874	0.564007
70	chr1	34500000	35000000	71	0.0502637	79	5	14	2	7.81107	0.524834	2.00023	0.225603
71	chr1	35000000	35500000	72	0.303189	120	371	343	202	11.8649	38.9427	49.0057	22.7859
72	chr1	35500000	36000000	73	0.744608	35	9	393	204	3.4606	0.944701	56.1494	23.0115
73	chr1	36000000	36500000	74	0.728151	0	594	5	2	0	62.3503	0.714369	0.225603
74	chr1	36500000	37000000	75	0.723409	40	1	0	0	3.95497	0.104967	0	0
75	chr1	37000000	37500000	76	0.256468	46	107	2	4	4.54822	11.2314	0.285748	0.451205
76	chr1	37500000	38000000	77	0.310119	7	18	23	4	0.69212	1.8894	3.2861	0.451205
77	chr1	38000000	38500000	78	0.646171	2	0	382	25	0.197749	0	54.5778	2.82003
78	chr1	38500000	39000000	79	0.26521	84	0	6	0	8.30545	0	0.857243	0
79	chr1	39000000	39500000	80	0.390651	2	18	142	2	0.197749	1.8894	20.2881	0.225603
80	chr1	39500000	40000000	81	0.769025	422	1	15	1	41.725	0.104967	2.14311	0.112801
81	chr1	40000000	40500000	82	0.789472	0	716	8	5	0	75.1562	1.14299	0.564007
82	chr1	40500000	41000000	83	0.848998	15	1	515	17	1.48312	0.104967	73.58	1.91762
83	chr1	41000000	41500000	84	0.777893	0	0	325	5	0	0	46.434	0.564007
84	chr1	41500000	42000000	85	0.616709	191	378	31	1	18.885	39.6775	4.42909	0.112801
85	chr1	42000000	42500000	86	0.690465	10	4	2	2	0.988743	0.419867	0.285748	0.225603
86	chr1	42500000	43000000	87	0.700836	33	1	75	1148	3.26285	0.104967	10.7155	129.496
87	chr1	43000000	43500000	88	0.774789	2	4	20	0	0.197749	0.419867	2.85748	0
88	chr1	43500000	44000000	89	0.737117	3	4	0	13	0.296623	0.419867	0	1.46642
89	chr1	44000000	44500000	90	0.879665	9	9	4	0	0.889869	0.944701	0.571495	0
90	chr1	44500000	45000000	91	0.74802	179	0	23	2	17.6985	0	3.2861	0.225603
91	chr1	45000000	45500000	92	0.854027	325	53	43	1150	32.1342	5.56324	6.14357	129.722
92	chr1	45500000	46000000	93	0.822033	42	3	114	7	4.15272	0.3149	16.2876	0.789609
93	chr1	46000000	46500000	94	0.905883	0	0	201	190	0	0	28.7176	21.4323
94	chr1	46500000	47000000	95	0.826795	5	0	161	0	0.494372	0	23.0027	0
95	chr1	47000000	47500000	96	0.625036	447	0	136	24	44.1968	0	19.4308	2.70723
96	chr1	47500000	48000000	97	0.35193	3	1	54	1	0.296623	0.104967	7.71518	0.112801
97	chr1	48000000	48500000	98	-0.271945	2	1	53	1266	0.197749	0.104967	7.57231	142.806
98	chr1	48500000	49000000	99	-0.812931	200	7	20	854	19.7749	0.734768	2.85748	96.3323
99	chr1	49000000	49500000	100	-0.712376	286	90	0	1	28.2781	9.44701	0	0.112801
100	chr1	49500000	50000000	101	-1.01696	10	0	25	5	0.988743	0	3.57184	0.564007
101	chr1	50000000	50500000	102	-1.03654	357	62	3	22	35.2981	6.50794	0.428621	2.48163
102	chr1	50500000	51000000	103	-0.597251	272	6	44	53	26.8938	0.629801	6.28645	5.97847
103	chr1	51000000	51500000	104	0.0172426	9	28	23	1472	0.889869	2.93907	3.2861	166.044
104	chr1	51500000	52000000	105	0.242705	12	13	22	6	1.18649	1.36457	3.14322	0.676808
105	chr1	52000000	52500000	106	0.613911	33	3	31	6	3.26285	0.3149	4.42909	0.676808
106	chr1	52500000	53000000	107	0.844024	226	96	45	35	22.3456	10.0768	6.42932	3.94805
107	chr1	53000000	53500000	108	0.751477	9	5	164	1	0.889869	0.524834	23.4313	0.112801
108	chr1	53500000	54000000	109	0.784065	52	173	57	6	5.14147	18.1593	8.1438	0.676808
109	chr1	54000000	54500000	110	0.738549	3	91	10	11	0.296623	9.55198	1.42874	1.24081
110	chr1	54500000	55000000	111	0.824425	245	0	50	0	24.2242	0	7.14369	0
111	chr1	55000000	55500000	112	0.564172	615	870	529	1	60.8077	91.3211	75.5802	0.112801
112	chr1	55500000	56000000	113	0.138142	195	5	9	2	19.2805	0.524834	1.28586	0.225603
113	chr1	56000000	56500000	114	-0.364197	5	359	3	0	0.494372	37.6831	0.428621	0
114	chr1	56500000	57000000	115	-0.250476	2	263	72	4	0.197749	27.6063	10.2869	0.451205
115	chr1	57000000	57500000	116	-0.14896	9	1447	126	9	0.889869	151.887	18.0021	1.01521
116	chr1	57500000	58000000	117	-0.0792868	624	3	214	0	61.6976	0.3149	30.575	0
117	chr1	58000000	58500000	118	-0.265173	517	40	57	1	51.118	4.19867	8.1438	0.112801
118	chr1	58500000	59000000	119	0.0524656	20	6	64	36	1.97749	0.629801	9.14392	4.06085
119	chr1	59000000	59500000	120	0.412494	124	24	183	1	12.2604	2.5192	26.1459	0.112801
120	chr1	59500000	60000000	121	0.402219	561	11	26	14	55.4685	1.15463	3.71472	1.57922
121	chr1	60000000	60500000	122	-0.177963	14	4	358	115	1.38424	0.419867	51.1488	12.9722
122	chr1	60500000	61000000	123	-0.747674	721	515	3	5	71.2884	54.0579	0.428621	0.564007
123	chr1	61000000	61500000	124	-0.514348	31	9	212	0	3.0651	0.944701	30.2892	0
124	chr1	61500000	62000000	125	-0.184342	124	103	130	1	12.2604	10.8116	18.5736	0.112801
125	chr1	62000000	62500000	126	-0.21295	78	14	8	23	7.7122	1.46954	1.14299	2.59443
126	chr1	62500000	63000000	127	0.247984	772	0	191	0	76.331	0	27.2889	0
127	chr1	63000000	63500000	128	-0.036866	50	9	167	35	4.94372	0.944701	23.8599	3.94805
128	chr1	63500000	64000000	129	-0.217168	0	2	31	374	0	0.209934	4.42909	42.1877
129	chr1	64000000	64500000	130	-0.339808	16	9	69	5	1.58199	0.944701	9.85829	0.564007
130	chr1	64500000	65000000	131	-0.352441	4	1	16	1	0.395497	0.104967	2.28598	0.112801
131	chr1	65000000	65500000	132	-0.0200461	4	0	117	0	0.395497	0	16.7162	0
132	chr1	65500000	66000000	133	-0.335581	53	6	82	24	5.24034	0.629801	11.7156	2.70723
133	chr1	66000000	66500000	134	-0.906556	162	744	64	1351	16.0176	78.0953	9.14392	152.395
134	chr1	66500000	67000000	135	-0.688565	155	9	271	11	15.3255	0.944701	38.7188	1.24081
135	chr1	67000000	67500000	136	-0.249518	1	2	4	2	0.0988743	0.209934	0.571495	0.225603
136	chr1	67500000	68000000	137	0.0278024	11	4	91	685	1.08762	0.419867	13.0015	77.2689
137	chr1	68000000	68500000	138	-0.564579	665	16	65	1855	65.7514	1.67947	9.28679	209.246
138	chr1	68500000	69000000	139	-0.80446	11	12	301	1	1.08762	1.2596	43.005	0.112801
139	chr1	69000000	69500000	140	-0.770976	19	68	32	2	1.87861	7.13774	4.57196	0.225603
140	chr1	69500000	70000000	141	-0.44628	582	4	18	818	57.5449	0.419867	2.57173	92.2715
141	chr1	70000000	70500000	142	-0.716058	4	1214	2	17	0.395497	127.43	0.285748	1.91762
142	chr1	70500000	71000000	143	-0.238287	170	6	70	0	16.8086	0.629801	10.0012	0
143	chr1	71000000	71500000	144	-0.252942	78	33	18	1	7.7122	3.4639	2.57173	0.112801
144	chr1	71500000	72000000	145	-0.7461	14	2	7	9	1.38424	0.209934	1.00012	1.01521
145	chr1	72000000	72500000	146	-0.570581	567	5	102	327	56.0618	0.524834	14.5731	36.886
146	chr1	72500000	73000000	147	-0.691739	124	1	178	1	12.2604	0.104967	25.4315	0.112801
147	chr1	73000000	73500000	148	-0.847721	3	2	218	1	0.296623	0.209934	31.1465	0.112801
148	chr1	73500000	74000000	149	-0.884994	22	7	8	2	2.17524	0.734768	1.14299	0.225603
149	chr1	74000000	74500000	150	-0.812598	4	42	16	2104	0.395497	4.40861	2.28598	237.334
150	chr1	74500000	75000000	151	-0.848952	13	15	7	9	1.28537	1.5745	1.00012	1.01521
151	chr1	75000000	75500000	152	-0.663715	9	3	342	145	0.889869	0.3149	48.8628	16.3562
152	chr1	75500000	76000000	153	-0.685183	42	282	54	2	4.15272	29.6006	7.71518	0.225603
153	chr1	76000000	76500000	154	-0.321443	7	0	12	1	0.69212	0	1.71449	0.112801
154	chr1	76500000	77000000	155	-0.597326	519	7	279	31	51.3158	0.734768	39.8618	3.49684
155	chr1	77000000	77500000	156	-0.736643	250	8	37	5	24.7186	0.839734	5.28633	0.564007
156	chr1	77500000	78000000	157	-0.483729	116	1132	61	13	11.4694	118.822	8.7153	1.46642
157	chr1	78000000	78500000	158	0.148951	5	95	150	1	0.494372	9.97185	21.4311	0.112801
158	chr1	78500000	79000000	159	-0.650525	355	137	28	11	35.1004	14.3805	4.00047	1.24081
159	chr1	79000000	79500000	160	-0.825844	7	2	21	6	0.69212	0.209934	3.00035	0.676808
160	chr1	79500000	80000000	161	-0.916681	2	218	10	597	0.197749	22.8828	1.42874	67.3424
161	chr1	80000000	80500000	162	-0.921881	118	521	2	7	11.6672	54.6877	0.285748	0.789609
162	chr1	80500000	81000000	163	-0.898303	97	6	97	217	9.59081	0.629801	13.8588	24.4779
163	chr1	81000000	81500000	164	-0.923443	94	2	5	9	9.29419	0.209934	0.714369	1.01521
164	chr1	81500000	82000000	165	-0.850672	191	489	57	0	18.885	51.3288	8.1438	0
165	chr1	82000000	82500000	166	-0.86204	13	21	145	0	1.28537	2.2043	20.7167	0
166	chr1	82500000	83000000	167	-0.895512	132	132	74	4	13.0514	13.8556	10.5727	0.451205
167	chr1	83000000	83500000	168	-0.900183	275	0	397	0	27.1904	0	56.7209	0
169	chr1	84000000	84500000	170	-0.588719	58	275	47	2	5.73471	28.8659	6.71507	0.225603
170	chr1	84500000	85000000	171	0.0659392	15	9	47	1	1.48312	0.944701	6.71507	0.112801
171	chr1	85000000	85500000	172	-0.175809	0	1179	109	111	0	123.756	15.5732	12.5209
172	chr1	85500000	86000000	173	-0.366497	3	0	78	0	0.296623	0	11.1442	0
173	chr1	86000000	86500000	174	-0.71653	26	10	83	5	2.57073	1.04967	11.8585	0.564007
174	chr1	86500000	87000000	175	-0.715057	67	6	165	1986	6.62458	0.629801	23.5742	224.023
175	chr1	87000000	87500000	176	-0.279514	15	15	100	37	1.48312	1.5745	14.2874	4.17365
176	chr1	87500000	88000000	177	-0.534291	4	9	6	13	0.395497	0.944701	0.857243	1.46642
177	chr1	88000000	88500000	178	-0.894621	4	9	12	1	0.395497	0.944701	1.71449	0.112801
178	chr1	88500000	89000000	179	-0.885203	56	4	7	1	5.53696	0.419867	1.00012	0.112801
179	chr1	89000000	89500000	180	-0.150088	23	1335	10	1	2.27411	140.131	1.42874	0.112801
180	chr1	89500000	90000000	181	0.0681549	201	826	81	1748	19.8737	86.7026	11.5728	197.177
181	chr1	90000000	90500000	182	0.259573	423	16	181	52	41.8238	1.67947	25.8602	5.86567
182	chr1	90500000	91000000	183	-0.293125	3	6	47	7	0.296623	0.629801	6.71507	0.789609
183	chr1	91000000	91500000	184	0.153186	290	3	88	0	28.6736	0.3149	12.5729	0
184	chr1	91500000	92000000	185	-0.0195779	136	11	47	35	13.4469	1.15463	6.71507	3.94805
185	chr1	92000000	92500000	186	0.213699	4	1	243	0	0.395497	0.104967	34.7183	0
186	chr1	92500000	93000000	187	0.474656	189	54	42	14	18.6873	5.66821	6.0007	1.57922
187	chr1	93000000	93500000	188	0.436761	27	5	15	2	2.66961	0.524834	2.14311	0.225603
188	chr1	93500000	94000000	189	0.658709	577	1	2	6	57.0505	0.104967	0.285748	0.676808
189	chr1	94000000	94500000	190	0.545896	895	3	17	6	88.4925	0.3149	2.42885	0.676808
190	chr1	94500000	95000000	191	0.328684	91	38	10	31	8.99757	3.98874	1.42874	3.49684
191	chr1	95000000	95500000	192	-0.0671066	355	13	526	2	35.1004	1.36457	75.1516	0.225603
192	chr1	95500000	96000000	193	-0.635826	297	3	344	2	29.3657	0.3149	49.1486	0.225603
193	chr1	96000000	96500000	194	-0.900546	3	0	145	0	0.296623	0	20.7167	0
194	chr1	96500000	97000000	195	-0.83624	9	19	4	6	0.889869	1.99437	0.571495	0.676808
195	chr1	97000000	97500000	196	-0.575714	99	4	7	7	9.78856	0.419867	1.00012	0.789609
196	chr1	97500000	98000000	197	-0.448495	14	11	116	11	1.38424	1.15463	16.5734	1.24081
197	chr1	98000000	98500000	198	-0.279466	22	1299	66	1	2.17524	136.352	9.42967	0.112801
198	chr1	98500000	99000000	199	-0.577718	3	2	2	244	0.296623	0.209934	0.285748	27.5235
199	chr1	99000000	99500000	200	-0.811026	65	38	3	1	6.42683	3.98874	0.428621	0.112801
200	chr1	99500000	100000000	201	-0.798763	329	1107	19	5	32.5297	116.198	2.7146	0.564007
201	chr1	100000000	100500000	202	-0.222445	257	68	1	0	25.4107	7.13774	0.142874	0
202	chr1	100500000	101000000	203	0.226613	2	65	165	0	0.197749	6.82284	23.5742	0
203	chr1	101000000	101500000	204	-0.124028	11	5	7	110	1.08762	0.524834	1.00012	12.4081
204	chr1	101500000	102000000	205	0.198543	1	187	1	1	0.0988743	19.6288	0.142874	0.112801
205	chr1	102000000	102500000	206	-0.686142	0	0	6	0	0	0	0.857243	0
206	chr1	102500000	103000000	207	-0.766336	28	121	107	0	2.76848	12.701	15.2875	0
207	chr1	103000000	103500000	208	-0.822918	3	0	108	14	0.296623	0	15.4304	1.57922
210	chr1	104500000	105000000	211	-0.928592	96	140	13	23	9.49194	14.6954	1.85736	2.59443
211	chr1	105000000	105500000	212	-0.922059	41	7	5	6	4.05385	0.734768	0.714369	0.676808
212	chr1	105500000	106000000	213	-0.954146	222	13	21	3	21.9501	1.36457	3.00035	0.338404
213	chr1	106000000	106500000	214	-0.918377	711	8	21	15	70.2997	0.839734	3.00035	1.69202
214	chr1	106500000	107000000	215	-0.940877	2	31	30	91	0.197749	3.25397	4.28621	10.2649
215	chr1	107000000	107500000	216	-0.94837	18	231	114	1	1.77974	24.2473	16.2876	0.112801
216	chr1	107500000	108000000	217	-0.754824	4	3	44	23	0.395497	0.3149	6.28645	2.59443
217	chr1	108000000	108500000	218	-0.0986405	663	1	123	5	65.5537	0.104967	17.5735	0.564007
218	chr1	108500000	109000000	219	0.143468	47	10	339	13	4.64709	1.04967	48.4342	1.46642
219	chr1	109000000	109500000	220	0.437449	4	321	237	54	0.395497	33.6943	33.8611	6.09127
220	chr1	109500000	110000000	221	0.785209	23	2	1	8	2.27411	0.209934	0.142874	0.902411
221	chr1	110000000	110500000	222	0.932189	55	9	58	1	5.43809	0.944701	8.28668	0.112801
222	chr1	110500000	111000000	223	0.915908	124	0	1	0	12.2604	0	0.142874	0
223	chr1	111000000	111500000	224	0.903358	36	0	29	2	3.55948	0	4.14334	0.225603
224	chr1	111500000	112000000	225	0.992261	3	826	120	19	0.296623	86.7026	17.1449	2.14323
225	chr1	112000000	112500000	226	0.7754	660	6	14	757	65.2571	0.629801	2.00023	85.3906
226	chr1	112500000	113000000	227	0.488707	814	141	342	8	80.4837	14.8003	48.8628	0.902411
227	chr1	113000000	113500000	228	0.738722	104	288	14	0	10.2829	30.2304	2.00023	0
228	chr1	113500000	114000000	229	0.606915	0	1	82	0	0	0.104967	11.7156	0
229	chr1	114000000	114500000	230	0.667345	12	8	71	9	1.18649	0.839734	10.144	1.01521
230	chr1	114500000	115000000	231	0.680744	74	16	63	48	7.3167	1.67947	9.00105	5.41446
231	chr1	115000000	115500000	232	0.639848	308	1	21	0	30.4533	0.104967	3.00035	0
232	chr1	115500000	116000000	233	0.552554	1	1307	202	480	0.0988743	137.192	28.8605	54.1446
233	chr1	116000000	116500000	234	0.580002	691	1	84	209	68.3222	0.104967	12.0014	23.5755
234	chr1	116500000	117000000	235	0.556664	237	335	209	6	23.4332	35.1639	29.8606	0.676808
235	chr1	117000000	117500000	236	0.772965	2	15	393	371	0.197749	1.5745	56.1494	41.8493
236	chr1	117500000	118000000	237	0.417528	269	2	60	48	26.5972	0.209934	8.57243	5.41446
237	chr1	118000000	118500000	238	0.238495	424	383	75	1	41.9227	40.2023	10.7155	0.112801
238	chr1	118500000	119000000	239	-0.625201	204	750	38	1	20.1704	78.7251	5.4292	0.112801
239	chr1	119000000	119500000	240	-0.756918	241	12	148	8	23.8287	1.2596	21.1453	0.902411
240	chr1	119500000	120000000	241	-0.278136	89	879	23	3	8.79982	92.2658	3.2861	0.338404
241	chr1	120000000	120500000	242	0.121869	3	0	97	0	0.296623	0	13.8588	0
243	chr1	121000000	121500000	244	0.0404594	1241	230	8	21	122.703	24.1424	1.14299	2.36883
290	chr1	144500000	145000000	291	0.695667	603	125	47	7	59.6212	13.1209	6.71507	0.789609
291	chr1	145000000	145500000	292	0.824198	891	1	372	7	88.097	0.104967	53.149	0.789609
294	chr1	146500000	147000000	295	0.772925	40	100	65	5	3.95497	10.4967	9.28679	0.564007
295	chr1	147000000	147500000	296	0.860181	59	0	456	3	5.83359	0	65.1504	0.338404
299	chr1	149000000	149500000	300	-0.360481	43	10	334	19	4.2516	1.04967	47.7198	2.14323
301	chr1	150000000	150500000	302	1.05226	0	0	0	15	0	0	0	1.69202
302	chr1	150500000	151000000	303	1.11496	0	1	0	0	0	0.104967	0	0
303	chr1	151000000	151500000	304	1.05376	6	0	87	0	0.593246	0	12.43	0
304	chr1	151500000	152000000	305	0.958724	26	203	64	1	2.57073	21.3083	9.14392	0.112801
305	chr1	152000000	152500000	306	0.672169	24	11	356	1	2.37298	1.15463	50.8631	0.112801
306	chr1	152500000	153000000	307	0.241229	32	700	245	1390	3.16398	73.4768	35.0041	156.794
307	chr1	153000000	153500000	308	0.440272	31	2	887	3	3.0651	0.209934	126.729	0.338404
308	chr1	153500000	154000000	309	0.925403	12	3	50	1	1.18649	0.3149	7.14369	0.112801
309	chr1	154000000	154500000	310	0.857555	505	0	23	3	49.9315	0	3.2861	0.338404
310	chr1	154500000	155000000	311	0.963306	0	1	387	1	0	0.104967	55.2921	0.112801
311	chr1	155000000	155500000	312	0.972472	1	0	25	817	0.0988743	0	3.57184	92.1587
312	chr1	155500000	156000000	313	0.9588	4	31	38	14	0.395497	3.25397	5.4292	1.57922
313	chr1	156000000	156500000	314	0.970296	0	0	95	0	0	0	13.573	0
314	chr1	156500000	157000000	315	0.882589	106	0	33	2	10.4807	0	4.71483	0.225603
315	chr1	157000000	157500000	316	0.378135	24	3	15	13	2.37298	0.3149	2.14311	1.46642
316	chr1	157500000	158000000	317	0.299067	116	181	49	7	11.4694	18.999	7.00081	0.789609
317	chr1	158000000	158500000	318	0.689818	4	29	332	115	0.395497	3.04404	47.4341	12.9722
318	chr1	158500000	159000000	319	0.236566	158	9	9	44	15.6221	0.944701	1.28586	4.96326
319	chr1	159000000	159500000	320	0.0207658	97	40	171	1	9.59081	4.19867	24.4314	0.112801
320	chr1	159500000	160000000	321	0.266062	236	239	37	1	23.3343	25.0871	5.28633	0.112801
321	chr1	160000000	160500000	322	0.844109	285	1	356	1422	28.1792	0.104967	50.8631	160.403
322	chr1	160500000	161000000	323	0.965509	8	3	269	1259	0.790995	0.3149	38.433	142.017
323	chr1	161000000	161500000	324	0.902684	4	0	226	3	0.395497	0	32.2895	0.338404
324	chr1	161500000	162000000	325	0.587922	12	1	29	1	1.18649	0.104967	4.14334	0.112801
325	chr1	162000000	162500000	326	0.109427	93	0	13	5	9.19531	0	1.85736	0.564007
326	chr1	162500000	163000000	327	-0.0732706	506	1	107	4	50.0304	0.104967	15.2875	0.451205
327	chr1	163000000	163500000	328	-0.435327	298	2	204	26	29.4646	0.209934	29.1462	2.93283
328	chr1	163500000	164000000	329	-0.468382	73	3	8	5	7.21783	0.3149	1.14299	0.564007
329	chr1	164000000	164500000	330	-0.784031	23	12	13	2	2.27411	1.2596	1.85736	0.225603
330	chr1	164500000	165000000	331	-0.659664	4	2	2	47	0.395497	0.209934	0.285748	5.30166
331	chr1	165000000	165500000	332	-0.465569	47	726	11	1	4.64709	76.2059	1.57161	0.112801
332	chr1	165500000	166000000	333	0.172313	258	385	38	575	25.5096	40.4122	5.4292	64.8608
333	chr1	166000000	166500000	334	-0.204628	18	18	124	195	1.77974	1.8894	17.7163	21.9963
334	chr1	166500000	167000000	335	-0.0689376	240	4	229	0	23.7298	0.419867	32.7181	0
335	chr1	167000000	167500000	336	0.47379	13	5	0	1	1.28537	0.524834	0	0.112801
336	chr1	167500000	168000000	337	0.622065	1	1	54	0	0.0988743	0.104967	7.71518	0
337	chr1	168000000	168500000	338	0.57083	4	1	92	0	0.395497	0.104967	13.1444	0
338	chr1	168500000	169000000	339	0.123508	6	11	7	120	0.593246	1.15463	1.00012	13.5362
339	chr1	169000000	169500000	340	0.294908	19	5	174	68	1.87861	0.524834	24.86	7.67049
340	chr1	169500000	170000000	341	0.470069	30	99	247	17	2.96623	10.3917	35.2898	1.91762
341	chr1	170000000	170500000	342	0.225962	4	3	199	1730	0.395497	0.3149	28.4319	195.146
342	chr1	170500000	171000000	343	-0.09611	25	3	4	0	2.47186	0.3149	0.571495	0
343	chr1	171000000	171500000	344	-0.0254627	366	2	198	23	36.188	0.209934	28.289	2.59443
344	chr1	171500000	172000000	345	0.399163	20	22	195	35	1.97749	2.30927	27.8604	3.94805
345	chr1	172000000	172500000	346	0.35164	239	76	25	63	23.631	7.97748	3.57184	7.10648
346	chr1	172500000	173000000	347	0.450465	308	6	118	673	30.4533	0.629801	16.8591	75.9153
347	chr1	173000000	173500000	348	0.271555	532	37	134	16	52.6012	3.88377	19.1451	1.80482
348	chr1	173500000	174000000	349	0.376004	31	10	217	3	3.0651	1.04967	31.0036	0.338404
349	chr1	174000000	174500000	350	0.175134	299	377	6	8	29.5634	39.5725	0.857243	0.902411
350	chr1	174500000	175000000	351	0.0612322	102	296	14	9	10.0852	31.0702	2.00023	1.01521
351	chr1	175000000	175500000	352	-0.0683745	6	7	10	1142	0.593246	0.734768	1.42874	128.819
352	chr1	175500000	176000000	353	-0.316693	8	7	223	19	0.790995	0.734768	31.8608	2.14323
353	chr1	176000000	176500000	354	-0.428405	75	3	9	174	7.41558	0.3149	1.28586	19.6274
354	chr1	176500000	177000000	355	-0.728404	0	0	0	0	0	0	0	0
355	chr1	177000000	177500000	356	-0.727653	2	7	285	4	0.197749	0.734768	40.719	0.451205
356	chr1	177500000	178000000	357	-0.515826	19	489	863	39	1.87861	51.3288	123.3	4.39925
357	chr1	178000000	178500000	358	-0.543893	427	8	153	1116	42.2193	0.839734	21.8597	125.886
358	chr1	178500000	179000000	359	0.0112379	190	7	8	2214	18.7861	0.734768	1.14299	249.742
359	chr1	179000000	179500000	360	0.238505	19	82	178	46	1.87861	8.60728	25.4315	5.18886
360	chr1	179500000	180000000	361	0.238404	48	6	306	301	4.74597	0.629801	43.7194	33.9532
361	chr1	180000000	180500000	362	0.467846	338	3	9	2	33.4195	0.3149	1.28586	0.225603
362	chr1	180500000	181000000	363	0.49084	33	11	15	1	3.26285	1.15463	2.14311	0.112801
363	chr1	181000000	181500000	364	0.244677	30	13	5	5	2.96623	1.36457	0.714369	0.564007
364	chr1	181500000	182000000	365	-0.119073	21	46	79	2	2.07636	4.82847	11.287	0.225603
365	chr1	182000000	182500000	366	0.459432	28	6	156	2	2.76848	0.629801	22.2883	0.225603
366	chr1	182500000	183000000	367	0.198396	30	108	7	21	2.96623	11.3364	1.00012	2.36883
367	chr1	183000000	183500000	368	0.140392	117	1054	197	12	11.5683	110.635	28.1461	1.35362
368	chr1	183500000	184000000	369	0.10779	29	25	269	2	2.86736	2.62417	38.433	0.225603
369	chr1	184000000	184500000	370	-0.237011	401	3	287	247	39.6486	0.3149	41.0048	27.8619
370	chr1	184500000	185000000	371	-0.323456	1142	5	4	3	112.915	0.524834	0.571495	0.338404
371	chr1	185000000	185500000	372	-0.311764	271	126	15	4	26.7949	13.2258	2.14311	0.451205
372	chr1	185500000	186000000	373	-0.765834	73	11	14	1075	7.21783	1.15463	2.00023	121.261
373	chr1	186000000	186500000	374	-0.638781	29	17	325	71	2.86736	1.78444	46.434	8.00889
374	chr1	186500000	187000000	375	-0.875497	39	15	5	2	3.8561	1.5745	0.714369	0.225603
375	chr1	187000000	187500000	376	-0.858051	10	6	10	135	0.988743	0.629801	1.42874	15.2282
376	chr1	187500000	188000000	377	-1.0233	31	2	10	409	3.0651	0.209934	1.42874	46.1357
377	chr1	188000000	188500000	378	-1.01136	265	4	4	0	26.2017	0.419867	0.571495	0
378	chr1	188500000	189000000	379	-0.983683	4	23	87	197	0.395497	2.41424	12.43	22.2219
379	chr1	189000000	189500000	380	-0.968979	23	131	130	9	2.27411	13.7507	18.5736	1.01521
380	chr1	189500000	190000000	381	-1.00501	1	0	3	97	0.0988743	0	0.428621	10.9417
381	chr1	190000000	190500000	382	-0.976351	421	170	5	2	41.6261	17.8444	0.714369	0.225603
382	chr1	190500000	191000000	383	-0.98411	6	4	221	6	0.593246	0.419867	31.5751	0.676808
383	chr1	191000000	191500000	384	-1.00264	1	1	5	0	0.0988743	0.104967	0.714369	0
384	chr1	191500000	192000000	385	-0.992222	223	4	399	1	22.049	0.419867	57.0066	0.112801
385	chr1	192000000	192500000	386	-0.876289	103	6	73	1	10.1841	0.629801	10.4298	0.112801
386	chr1	192500000	193000000	387	-0.7044	14	3	262	4	1.38424	0.3149	37.4329	0.451205
387	chr1	193000000	193500000	388	-0.370612	1	0	133	41	0.0988743	0	19.0022	4.62485
388	chr1	193500000	194000000	389	-0.747699	446	6	4	4	44.098	0.629801	0.571495	0.451205
389	chr1	194000000	194500000	390	-0.546398	12	6	108	15	1.18649	0.629801	15.4304	1.69202
390	chr1	194500000	195000000	391	-0.592228	9	7	20	2	0.889869	0.734768	2.85748	0.225603
391	chr1	195000000	195500000	392	-0.57493	1226	12	4	20	121.22	1.2596	0.571495	2.25603
392	chr1	195500000	196000000	393	-0.807115	13	8	52	2	1.28537	0.839734	7.42944	0.225603
393	chr1	196000000	196500000	394	-1.02995	10	1	319	15	0.988743	0.104967	45.5767	1.69202
394	chr1	196500000	197000000	395	-1.03544	15	1	4	18	1.48312	0.104967	0.571495	2.03042
395	chr1	197000000	197500000	396	-0.648995	142	3	108	1	14.0402	0.3149	15.4304	0.112801
396	chr1	197500000	198000000	397	-0.222762	14	2	43	2	1.38424	0.209934	6.14357	0.225603
397	chr1	198000000	198500000	398	-0.0557851	20	3	34	9	1.97749	0.3149	4.85771	1.01521
398	chr1	198500000	199000000	399	-0.116145	166	0	112	1019	16.4131	0	16.0019	114.945
399	chr1	199000000	199500000	400	-0.263208	18	6	24	2	1.77974	0.629801	3.42897	0.225603
400	chr1	199500000	200000000	401	-0.555257	69	7	13	3	6.82233	0.734768	1.85736	0.338404
401	chr1	200000000	200500000	402	-0.208336	481	73	184	0	47.5586	7.66258	26.2888	0
402	chr1	200500000	201000000	403	0.480831	0	1	238	1	0	0.104967	34.004	0.112801
403	chr1	201000000	201500000	404	0.636927	545	1	233	3	53.8865	0.104967	33.2896	0.338404
404	chr1	201500000	202000000	405	0.778828	306	5	136	3	30.2555	0.524834	19.4308	0.338404
405	chr1	202000000	202500000	406	0.840598	0	0	0	0	0	0	0	0
406	chr1	202500000	203000000	407	0.940666	48	6	2	1	4.74597	0.629801	0.285748	0.112801
407	chr1	203000000	203500000	408	0.84197	7	2	17	1	0.69212	0.209934	2.42885	0.112801
408	chr1	203500000	204000000	409	0.980598	115	27	5	1	11.3705	2.8341	0.714369	0.112801
409	chr1	204000000	204500000	410	0.94055	194	0	237	990	19.1816	0	33.8611	111.673
410	chr1	204500000	205000000	411	0.87037	0	0	1	2	0	0	0.142874	0.225603
411	chr1	205000000	205500000	412	0.939876	0	6	33	1	0	0.629801	4.71483	0.112801
412	chr1	205500000	206000000	413	0.975915	25	3	3	1711	2.47186	0.3149	0.428621	193.003
414	chr1	206500000	207000000	415	0.938409	30	4	83	2	2.96623	0.419867	11.8585	0.225603
415	chr1	207000000	207500000	416	0.650067	1	1	30	11	0.0988743	0.104967	4.28621	1.24081
416	chr1	207500000	208000000	417	0.537516	37	6	4	5	3.65835	0.629801	0.571495	0.564007
417	chr1	208000000	208500000	418	0.123443	128	43	490	142	12.6559	4.51357	70.0081	16.0178
418	chr1	208500000	209000000	419	-0.431164	143	3	26	2	14.139	0.3149	3.71472	0.225603
419	chr1	209000000	209500000	420	-0.417263	136	269	69	2	13.4469	28.2361	9.85829	0.225603
420	chr1	209500000	210000000	421	-0.0884901	974	7	84	39	96.3036	0.734768	12.0014	4.39925
421	chr1	210000000	210500000	422	-0.241307	13	40	330	3	1.28537	4.19867	47.1483	0.338404
422	chr1	210500000	211000000	423	-0.0624759	5	25	98	613	0.494372	2.62417	14.0016	69.1472
423	chr1	211000000	211500000	424	-0.0498482	48	2	134	18	4.74597	0.209934	19.1451	2.03042
424	chr1	211500000	212000000	425	0.400967	146	4	148	4	14.4357	0.419867	21.1453	0.451205
425	chr1	212000000	212500000	426	0.464677	3	0	1	2	0.296623	0	0.142874	0.225603
426	chr1	212500000	213000000	427	0.580539	2	1367	55	0	0.197749	143.49	7.85806	0
427	chr1	213000000	213500000	428	0.200474	3	22	348	6	0.296623	2.30927	49.7201	0.676808
428	chr1	213500000	214000000	429	-0.148059	269	26	393	14	26.5972	2.72914	56.1494	1.57922
429	chr1	214000000	214500000	430	-0.178136	3	8	305	575	0.296623	0.839734	43.5765	64.8608
430	chr1	214500000	215000000	431	-0.537443	328	108	29	121	32.4308	11.3364	4.14334	13.649
431	chr1	215000000	215500000	432	-1.02358	86	565	371	4	8.50319	59.3062	53.0062	0.451205
432	chr1	215500000	216000000	433	-0.86489	5	5	315	0	0.494372	0.524834	45.0052	0
433	chr1	216000000	216500000	434	-1.00801	12	173	91	402	1.18649	18.1593	13.0015	45.3461
434	chr1	216500000	217000000	435	-0.977233	20	791	1	90	1.97749	83.0287	0.142874	10.1521
435	chr1	217000000	217500000	436	-0.958888	34	0	1	0	3.36173	0	0.142874	0
436	chr1	217500000	218000000	437	-0.834461	50	3	169	10	4.94372	0.3149	24.1457	1.12801
437	chr1	218000000	218500000	438	-0.846878	280	6	29	2	27.6848	0.629801	4.14334	0.225603
438	chr1	218500000	219000000	439	-0.682677	0	1	39	1	0	0.104967	5.57208	0.112801
439	chr1	219000000	219500000	440	-0.924733	1	1	1	87	0.0988743	0.104967	0.142874	9.81372
440	chr1	219500000	220000000	441	-0.881481	5	5	5	4	0.494372	0.524834	0.714369	0.451205
441	chr1	220000000	220500000	442	-0.260435	6	5	20	2	0.593246	0.524834	2.85748	0.225603
442	chr1	220500000	221000000	443	-0.730115	2	247	46	2	0.197749	25.9268	6.57219	0.225603
443	chr1	221000000	221500000	444	-0.776542	193	7	5	1	19.0827	0.734768	0.714369	0.112801
444	chr1	221500000	222000000	445	-0.314596	97	47	433	0	9.59081	4.93344	61.8643	0
445	chr1	222000000	222500000	446	-0.422805	13	93	172	2	1.28537	9.76191	24.5743	0.225603
446	chr1	222500000	223000000	447	0.0473129	2	591	105	2	0.197749	62.0354	15.0017	0.225603
447	chr1	223000000	223500000	448	0.398112	11	2	213	4	1.08762	0.209934	30.4321	0.451205
448	chr1	223500000	224000000	449	0.420227	11	8	7	2	1.08762	0.839734	1.00012	0.225603
449	chr1	224000000	224500000	450	0.598227	2	0	230	1	0.197749	0	32.861	0.112801
450	chr1	224500000	225000000	451	0.355404	51	0	57	0	5.04259	0	8.1438	0
451	chr1	225000000	225500000	452	0.0827213	210	7	20	3	20.7636	0.734768	2.85748	0.338404
452	chr1	225500000	226000000	453	0.706098	246	15	4	7	24.3231	1.5745	0.571495	0.789609
453	chr1	226000000	226500000	454	0.958124	4	1	7	0	0.395497	0.104967	1.00012	0
454	chr1	226500000	227000000	455	0.937108	0	37	181	2	0	3.88377	25.8602	0.225603
455	chr1	227000000	227500000	456	0.805577	398	6	4	2	39.352	0.629801	0.571495	0.225603
456	chr1	227500000	228000000	457	0.725152	21	559	138	1	2.07636	58.6764	19.7166	0.112801
457	chr1	228000000	228500000	458	1.0175	219	3	1	0	21.6535	0.3149	0.142874	0
458	chr1	228500000	229000000	459	1.0221	41	1	4	1	4.05385	0.104967	0.571495	0.112801
459	chr1	229000000	229500000	460	1.04671	59	0	126	1	5.83359	0	18.0021	0.112801
460	chr1	229500000	230000000	461	0.931679	291	3	3	0	28.7724	0.3149	0.428621	0
461	chr1	230000000	230500000	462	0.952183	4	5	152	0	0.395497	0.524834	21.7168	0
462	chr1	230500000	231000000	463	0.762377	0	46	47	2	0	4.82847	6.71507	0.225603
463	chr1	231000000	231500000	464	0.86446	203	2	0	26	20.0715	0.209934	0	2.93283
464	chr1	231500000	232000000	465	0.714665	595	81	50	15	58.8302	8.50231	7.14369	1.69202
465	chr1	232000000	232500000	466	0.627504	903	0	75	754	89.2835	0	10.7155	85.0522
466	chr1	232500000	233000000	467	0.786825	0	1	90	1	0	0.104967	12.8586	0.112801
467	chr1	233000000	233500000	468	0.669726	591	1	48	1	58.4347	0.104967	6.85794	0.112801
468	chr1	233500000	234000000	469	0.463092	108	0	1	0	10.6784	0	0.142874	0
469	chr1	234000000	234500000	470	0.470932	160	0	15	0	15.8199	0	2.14311	0
470	chr1	234500000	235000000	471	1.01982	1	2	471	1	0.0988743	0.209934	67.2935	0.112801
471	chr1	235000000	235500000	472	0.829788	748	2	2	27	73.958	0.209934	0.285748	3.04564
472	chr1	235500000	236000000	473	0.553208	211	6	386	3	20.8625	0.629801	55.1493	0.338404
473	chr1	236000000	236500000	474	0.124661	3	7	82	5	0.296623	0.734768	11.7156	0.564007
474	chr1	236500000	237000000	475	-0.198975	10	0	4	987	0.988743	0	0.571495	111.335
475	chr1	237000000	237500000	476	-0.753263	83	20	21	3	8.20657	2.09934	3.00035	0.338404
476	chr1	237500000	238000000	477	-0.968846	35	554	200	3	3.4606	58.1516	28.5748	0.338404
477	chr1	238000000	238500000	478	-1.06083	22	6	7	140	2.17524	0.629801	1.00012	15.7922
478	chr1	238500000	239000000	479	-1.17149	16	510	3	1	1.58199	53.5331	0.428621	0.112801
479	chr1	239000000	239500000	480	-1.12333	4	1	2	9	0.395497	0.104967	0.285748	1.01521
480	chr1	239500000	240000000	481	-0.941066	8	7	30	17	0.790995	0.734768	4.28621	1.91762
481	chr1	240000000	240500000	482	-0.935906	2	620	20	1	0.197749	65.0794	2.85748	0.112801
482	chr1	240500000	241000000	483	-0.996262	831	0	1	3	82.1646	0	0.142874	0.338404
483	chr1	241000000	241500000	484	-1.01563	9	1	199	3	0.889869	0.104967	28.4319	0.338404
484	chr1	241500000	242000000	485	-0.568471	3	1	40	2	0.296623	0.104967	5.71495	0.225603
485	chr1	242000000	242500000	486	-0.708776	548	2	23	6	54.1831	0.209934	3.2861	0.676808
486	chr1	242500000	243000000	487	-0.951346	34	4	8	0	3.36173	0.419867	1.14299	0
487	chr1	243000000	243500000	488	-0.404838	537	185	32	0	53.0955	19.4189	4.57196	0
488	chr1	243500000	244000000	489	-0.0604112	81	2	52	50	8.00882	0.209934	7.42944	5.64007
489	chr1	244000000	244500000	490	-0.221746	103	2	127	0	10.1841	0.209934	18.145	0
490	chr1	244500000	245000000	491	0.0699165	0	113	158	114	0	11.8612	22.5741	12.8594
491	chr1	245000000	245500000	492	0.191209	86	1	205	0	8.50319	0.104967	29.2891	0
492	chr1	245500000	246000000	493	-0.199966	118	10	189	4	11.6672	1.04967	27.0031	0.451205
493	chr1	246000000	246500000	494	-0.183264	103	2	99	0	10.1841	0.209934	14.1445	0
494	chr1	246500000	247000000	495	0.280739	278	77	75	0	27.4871	8.08244	10.7155	0
495	chr1	247000000	247500000	496	-0.0490705	268	0	56	1	26.4983	0	8.00093	0.112801
496	chr1	247500000	248000000	497	-1.25401	23	6	119	682	2.27411	0.629801	17.002	76.9305
497	chr1	248000000	248500000	498	-1.46878	329	18	38	9	32.5297	1.8894	5.4292	1.01521
570	chr10	35000000	35500000	571	0.506875	5	0	167	1395	0.494372	0	23.8599	157.358
524	chr10	12000000	12500000	525	0.813712	5	12	912	272	0.494372	1.2596	130.301	30.682
729	chr10	114500000	115000000	730	0.212964	0	0	236	62	0	0	33.7182	6.99368
742	chr10	121000000	121500000	743	0.773762	528	3	94	2	52.2057	0.3149	13.4301	0.225603
518	chr10	9000000	9500000	519	-0.268003	190	1283	6	2	18.7861	134.672	0.857243	0.225603
679	chr10	89500000	90000000	680	0.740734	159	86	95	1	15.721	9.02715	13.573	0.112801
709	chr10	104500000	105000000	710	0.720127	364	0	190	0	35.9903	0	27.146	0
708	chr10	104000000	104500000	709	0.712303	14	4	6	2	1.38424	0.419867	0.857243	0.225603
641	chr10	70500000	71000000	642	0.705138	0	345	153	10	0	36.2135	21.8597	1.12801
710	chr10	105000000	105500000	711	0.701614	17	0	181	0	1.68086	0	25.8602	0
707	chr10	103500000	104000000	708	0.689086	20	6	30	0	1.97749	0.629801	4.28621	0
512	chr10	6000000	6500000	513	0.68006	87	6	133	4	8.60207	0.629801	19.0022	0.451205
525	chr10	12500000	13000000	526	0.678135	521	0	120	1793	51.5135	0	17.1449	202.253
647	chr10	73500000	74000000	648	0.667952	3	3	352	7	0.296623	0.3149	50.2916	0.789609
650	chr10	75000000	75500000	651	0.667944	9	675	361	1	0.889869	70.8526	51.5774	0.112801
565	chr10	32500000	33000000	566	0.667681	177	31	22	84	17.5008	3.25397	3.14322	9.47531
651	chr10	75500000	76000000	652	0.664438	117	1578	25	142	11.5683	165.638	3.57184	16.0178
752	chr10	126000000	126500000	753	0.643907	492	26	99	13	48.6462	2.72914	14.1445	1.46642
698	chr10	99000000	99500000	699	0.637574	0	1	255	4	0	0.104967	36.4328	0.451205
642	chr10	71000000	71500000	643	0.6365	0	770	34	3	0	80.8244	4.85771	0.338404
704	chr10	102000000	102500000	705	0.636036	721	5	101	42	71.2884	0.524834	14.4302	4.73766
648	chr10	74000000	74500000	649	0.635922	5	244	38	3	0.494372	25.6119	5.4292	0.338404
680	chr10	90000000	90500000	681	0.634266	341	4	300	701	33.7162	0.419867	42.8621	79.0737
640	chr10	70000000	70500000	641	0.620706	1	66	219	0	0.0988743	6.92781	31.2894	0
643	chr10	71500000	72000000	644	0.619678	653	1	190	0	64.5649	0.104967	27.146	0
705	chr10	102500000	103000000	706	0.61328	3	493	178	1	0.296623	51.7486	25.4315	0.112801
706	chr10	103000000	103500000	707	0.606345	0	1	137	2	0	0.104967	19.5737	0.225603
564	chr10	32000000	32500000	565	0.605704	297	5	212	1	29.3657	0.524834	30.2892	0.112801
697	chr10	98500000	99000000	698	0.603613	482	3	82	558	47.6574	0.3149	11.7156	62.9431
523	chr10	11500000	12000000	524	0.603612	4	1	608	1	0.395497	0.104967	86.8672	0.112801
649	chr10	74500000	75000000	650	0.601206	4	1	9	2	0.395497	0.104967	1.28586	0.225603
526	chr10	13000000	13500000	527	0.59526	451	0	162	0	44.5923	0	23.1455	0
644	chr10	72000000	72500000	645	0.593623	837	1	140	1	82.7578	0.104967	20.0023	0.112801
562	chr10	31000000	31500000	563	0.593338	1	744	336	4	0.0988743	78.0953	48.0056	0.451205
681	chr10	90500000	91000000	682	0.585058	122	106	466	1	12.0627	11.1265	66.5792	0.112801
653	chr10	76500000	77000000	654	0.583882	375	30	222	3	37.0779	3.149	31.718	0.338404
535	chr10	17500000	18000000	536	0.580598	625	51	200	3	61.7965	5.35331	28.5748	0.338404
741	chr10	120500000	121000000	742	0.580389	378	134	110	982	37.3745	14.0656	15.7161	110.771
513	chr10	6500000	7000000	514	0.575576	214	129	499	98	21.1591	13.5407	71.294	11.0545
703	chr10	101500000	102000000	704	0.568748	0	23	259	2	0	2.41424	37.0043	0.225603
688	chr10	94000000	94500000	689	0.568438	327	79	125	27	32.3319	8.29238	17.8592	3.04564
516	chr10	8000000	8500000	517	0.568326	325	590	324	2	32.1342	61.9304	46.2911	0.225603
678	chr10	89000000	89500000	679	0.567631	91	0	99	96	8.99757	0	14.1445	10.8289
711	chr10	105500000	106000000	712	0.566477	1	573	390	0	0.0988743	60.146	55.7208	0
566	chr10	33000000	33500000	567	0.560481	291	18	257	2	28.7724	1.8894	36.7186	0.225603
661	chr10	80500000	81000000	662	0.555195	442	58	339	3	43.7025	6.08807	48.4342	0.338404
696	chr10	98000000	98500000	697	0.553744	2	58	362	32	0.197749	6.08807	51.7203	3.60964
731	chr10	115500000	116000000	732	0.549403	1225	0	278	0	121.121	0	39.7189	0
677	chr10	88500000	89000000	678	0.537159	26	63	116	5	2.57073	6.61291	16.5734	0.564007
652	chr10	76000000	76500000	653	0.536548	132	0	16	221	13.0514	0	2.28598	24.9291
511	chr10	5500000	6000000	512	0.53418	60	47	177	1	5.93246	4.93344	25.2887	0.112801
646	chr10	73000000	73500000	647	0.526637	6	1	20	2	0.593246	0.104967	2.85748	0.225603
687	chr10	93500000	94000000	688	0.519237	99	2	59	0	9.78856	0.209934	8.42955	0
554	chr10	27000000	27500000	555	0.512419	20	3	550	23	1.97749	0.3149	78.5806	2.59443
561	chr10	30500000	31000000	562	0.510166	530	19	120	140	52.4034	1.99437	17.1449	15.7922
743	chr10	121500000	122000000	744	0.509033	10	4	484	51	0.988743	0.419867	69.1509	5.75287
770	chr10	135000000	135500000	771	0.498966	52	1	66	2	5.14147	0.104967	9.42967	0.225603
659	chr10	79500000	80000000	660	0.492306	154	54	7	1	15.2266	5.66821	1.00012	0.112801
768	chr10	134000000	134500000	769	0.48522	0	0	18	0	0	0	2.57173	0
514	chr10	7000000	7500000	515	0.460954	74	349	60	6	7.3167	36.6334	8.57243	0.676808
695	chr10	97500000	98000000	696	0.456403	848	2	50	979	83.8454	0.209934	7.14369	110.432
749	chr10	124500000	125000000	750	0.455504	630	75	99	8	62.2908	7.87251	14.1445	0.902411
534	chr10	17000000	17500000	535	0.443899	27	11	221	3	2.66961	1.15463	31.5751	0.338404
699	chr10	99500000	100000000	700	0.439676	2	59	73	0	0.197749	6.19304	10.4298	0
527	chr10	13500000	14000000	528	0.434317	294	111	138	435	29.0691	11.6513	19.7166	49.0686
563	chr10	31500000	32000000	564	0.419862	251	6	41	36	24.8175	0.629801	5.85782	4.06085
645	chr10	72500000	73000000	646	0.407783	530	0	21	0	52.4034	0	3.00035	0
689	chr10	94500000	95000000	690	0.405483	8	0	9	791	0.790995	0	1.28586	89.2258
529	chr10	14500000	15000000	530	0.402925	166	53	275	120	16.4131	5.56324	39.2903	13.5362
601	chr10	50500000	51000000	602	0.390467	269	2	67	1	26.5972	0.209934	9.57254	0.112801
682	chr10	91000000	91500000	683	0.378127	576	6	246	2627	56.9516	0.629801	35.1469	296.329
502	chr10	1000000	1500000	503	0.365268	606	2	112	185	59.9179	0.209934	16.0019	20.8682
590	chr10	45000000	45500000	591	0.357277	91	2	26	0	8.99757	0.209934	3.71472	0
685	chr10	92500000	93000000	686	0.348101	807	917	156	2	79.7916	96.2546	22.2883	0.225603
569	chr10	34500000	35000000	570	0.347563	282	3	222	31	27.8826	0.3149	31.718	3.49684
694	chr10	97000000	97500000	695	0.343215	146	193	91	19	14.4357	20.2586	13.0015	2.14323
676	chr10	88000000	88500000	677	0.337461	4	390	127	0	0.395497	40.9371	18.145	0
662	chr10	81000000	81500000	663	0.311882	36	3	72	2	3.55948	0.3149	10.2869	0.225603
724	chr10	112000000	112500000	725	0.305252	524	107	198	1	51.8102	11.2314	28.289	0.112801
627	chr10	63500000	64000000	628	0.301494	54	43	212	27	5.33921	4.51357	30.2892	3.04564
690	chr10	95000000	95500000	691	0.300701	4	2	93	163	0.395497	0.209934	13.2873	18.3866
515	chr10	7500000	8000000	516	0.298476	1216	3	7	391	120.231	0.3149	1.00012	44.1053
686	chr10	93000000	93500000	687	0.28935	19	228	489	686	1.87861	23.9324	69.8653	77.3817
660	chr10	80000000	80500000	661	0.285074	55	2	112	135	5.43809	0.209934	16.0019	15.2282
501	chr10	500000	1000000	502	0.27857	195	3	166	141	19.2805	0.3149	23.717	15.905
553	chr10	26500000	27000000	554	0.277103	0	1	4	9	0	0.104967	0.571495	1.01521
702	chr10	101000000	101500000	703	0.270972	0	1	191	3	0	0.104967	27.2889	0.338404
748	chr10	124000000	124500000	749	0.262061	338	946	273	61	33.4195	99.2986	39.0045	6.88088
530	chr10	15000000	15500000	531	0.260853	538	61	178	33	53.1944	6.40298	25.4315	3.72244
591	chr10	45500000	46000000	592	0.258185	25	5	367	36	2.47186	0.524834	52.4347	4.06085
767	chr10	133500000	134000000	768	0.250649	1	2	7	0	0.0988743	0.209934	1.00012	0
692	chr10	96000000	96500000	693	0.248492	44	0	355	0	4.35047	0	50.7202	0
630	chr10	65000000	65500000	631	0.246247	12	0	97	104	1.18649	0	13.8588	11.7313
639	chr10	69500000	70000000	640	0.241074	190	982	60	2	18.7861	103.077	8.57243	0.225603
584	chr10	42000000	42500000	585	0.240486	18	0	310	9	1.77974	0	44.2909	1.01521
750	chr10	125000000	125500000	751	0.232604	33	58	200	32	3.26285	6.08807	28.5748	3.60964
543	chr10	21500000	22000000	544	0.231861	353	1	550	569	34.9026	0.104967	78.5806	64.184
522	chr10	11000000	11500000	523	0.225453	285	1	30	3	28.1792	0.104967	4.28621	0.338404
559	chr10	29500000	30000000	560	0.208532	116	1574	147	237	11.4694	165.218	21.0024	26.7339
693	chr10	96500000	97000000	694	0.194656	201	11	187	18	19.8737	1.15463	26.7174	2.03042
594	chr10	47000000	47500000	595	0.193928	72	1239	280	49	7.11895	130.054	40.0047	5.52726
545	chr10	22500000	23000000	546	0.192878	299	324	459	14	29.5634	34.0092	65.5791	1.57922
732	chr10	116000000	116500000	733	0.192471	30	2	1	0	2.96623	0.209934	0.142874	0
505	chr10	2500000	3000000	506	0.191994	85	7	129	797	8.40432	0.734768	18.4307	89.9027
751	chr10	125500000	126000000	752	0.168038	18	321	253	619	1.77974	33.6943	36.1471	69.824
560	chr10	30000000	30500000	561	0.165902	686	1	45	114	67.8278	0.104967	6.42932	12.8594
763	chr10	131500000	132000000	764	0.159529	4	124	20	24	0.395497	13.0159	2.85748	2.70723
747	chr10	123500000	124000000	748	0.151132	405	2	59	0	40.0441	0.209934	8.42955	0
663	chr10	81500000	82000000	664	0.150173	840	849	34	21	83.0545	89.1168	4.85771	2.36883
587	chr10	43500000	44000000	588	0.143427	0	18	106	0	0	1.8894	15.1446	0
500	chr10	0	500000	501	0.135412	454	1913	27	2	44.889	200.802	3.85759	0.225603
700	chr10	100000000	100500000	701	0.13247	40	2	87	2	3.95497	0.209934	12.43	0.225603
769	chr10	134500000	135000000	770	0.127796	491	5	6	1436	48.5473	0.524834	0.857243	161.983
730	chr10	115000000	115500000	731	0.127429	248	878	25	1299	24.5208	92.1609	3.57184	146.529
740	chr10	120000000	120500000	741	0.094298	9	2	308	4	0.889869	0.209934	44.0051	0.451205
571	chr10	35500000	36000000	572	0.0940781	3	499	28	1689	0.296623	52.3784	4.00047	190.521
691	chr10	95500000	96000000	692	0.0781121	41	416	14	1	4.05385	43.6662	2.00023	0.112801
544	chr10	22000000	22500000	545	0.0774817	56	592	435	13	5.53696	62.1404	62.1501	1.46642
759	chr10	129500000	130000000	760	0.07047	468	472	121	406	46.2732	49.5443	17.2877	45.7973
733	chr10	116500000	117000000	734	0.0610114	5	1	310	3	0.494372	0.104967	44.2909	0.338404
533	chr10	16500000	17000000	534	0.0588171	119	2	74	22	11.766	0.209934	10.5727	2.48163
762	chr10	131000000	131500000	763	0.0477244	80	26	57	4	7.90995	2.72914	8.1438	0.451205
723	chr10	111500000	112000000	724	0.0328465	713	19	86	283	70.4974	1.99437	12.2871	31.9228
658	chr10	79000000	79500000	659	0.0271735	929	1	348	0	91.8543	0.104967	49.7201	0
568	chr10	34000000	34500000	569	0.0247877	26	664	292	7	2.57073	69.698	41.7191	0.789609
506	chr10	3000000	3500000	507	0.0240273	93	327	111	3	9.19531	34.3241	15.859	0.338404
576	chr10	38000000	38500000	577	0.0210828	12	204	160	2	1.18649	21.4132	22.8598	0.225603
557	chr10	28500000	29000000	558	0.0171186	222	398	1	365	21.9501	41.7768	0.142874	41.1725
753	chr10	126500000	127000000	754	0.00843446	122	4	10	572	12.0627	0.419867	1.42874	64.5224
599	chr10	49500000	50000000	600	0.00159069	8	1066	381	557	0.790995	111.895	54.4349	62.8303
555	chr10	27500000	28000000	556	-0.00498323	3	57	176	3	0.296623	5.98311	25.1458	0.338404
546	chr10	23000000	23500000	547	-0.015222	9	186	86	907	0.889869	19.5238	12.2871	102.311
712	chr10	106000000	106500000	713	-0.0305237	1047	839	369	64	103.521	88.0672	52.7204	7.21928
738	chr10	119000000	119500000	739	-0.0305673	0	7	93	6	0	0.734768	13.2873	0.676808
528	chr10	14000000	14500000	529	-0.0408293	24	518	3	392	2.37298	54.3728	0.428621	44.2181
725	chr10	112500000	113000000	726	-0.0453154	564	740	68	3	55.7651	77.6754	9.71542	0.338404
604	chr10	52000000	52500000	605	-0.0482422	350	253	368	9	34.606	26.5566	52.5775	1.01521
550	chr10	25000000	25500000	551	-0.0692834	28	7	123	4	2.76848	0.734768	17.5735	0.451205
761	chr10	130500000	131000000	762	-0.0786255	110	33	77	592	10.8762	3.4639	11.0013	66.7784
626	chr10	63000000	63500000	627	-0.0830787	560	1658	64	452	55.3696	174.035	9.14392	50.9862
675	chr10	87500000	88000000	676	-0.0910279	131	455	125	13	12.9525	47.7599	17.8592	1.46642
567	chr10	33500000	34000000	568	-0.0931423	7	1	263	38	0.69212	0.104967	37.5758	4.28645
600	chr10	50000000	50500000	601	-0.123008	580	2	166	4	57.3471	0.209934	23.717	0.451205
510	chr10	5000000	5500000	511	-0.124125	110	727	25	12	10.8762	76.3109	3.57184	1.35362
728	chr10	114000000	114500000	729	-0.128372	22	1	282	2	2.17524	0.104967	40.2904	0.225603
766	chr10	133000000	133500000	767	-0.149047	736	553	48	1	72.7715	58.0466	6.85794	0.112801
765	chr10	132500000	133000000	766	-0.157131	247	1652	2	850	24.422	173.405	0.285748	95.8811
588	chr10	44000000	44500000	589	-0.16818	75	15	76	3	7.41558	1.5745	10.8584	0.338404
654	chr10	77000000	77500000	655	-0.185819	36	8	21	1922	3.55948	0.839734	3.00035	216.804
517	chr10	8500000	9000000	518	-0.188411	764	14	400	97	75.54	1.46954	57.1495	10.9417
672	chr10	86000000	86500000	673	-0.197305	8	0	41	8	0.790995	0	5.85782	0.902411
735	chr10	117500000	118000000	736	-0.21339	1251	296	6	1742	123.692	31.0702	0.857243	196.5
764	chr10	132000000	132500000	765	-0.218413	10	1	214	298	0.988743	0.104967	30.575	33.6148
664	chr10	82000000	82500000	665	-0.226361	563	4	78	850	55.6663	0.419867	11.1442	95.8811
537	chr10	18500000	19000000	538	-0.232645	417	1655	129	77	41.2306	173.72	18.4307	8.6857
739	chr10	119500000	120000000	740	-0.235168	5	0	111	1	0.494372	0	15.859	0.112801
744	chr10	122000000	122500000	745	-0.250257	115	108	53	336	11.3705	11.3364	7.57231	37.9012
536	chr10	18000000	18500000	537	-0.251062	29	19	14	1	2.86736	1.99437	2.00023	0.112801
549	chr10	24500000	25000000	550	-0.268769	309	872	16	0	30.5522	91.5311	2.28598	0
629	chr10	64500000	65000000	630	-0.274884	5	1	47	3	0.494372	0.104967	6.71507	0.338404
760	chr10	130000000	130500000	761	-0.275408	216	1	0	9	21.3569	0.104967	0	1.01521
586	chr10	43000000	43500000	587	-0.289587	63	0	69	534	6.22908	0	9.85829	60.2359
507	chr10	3500000	4000000	508	-0.291265	60	584	151	1	5.93246	61.3006	21.5739	0.112801
628	chr10	64000000	64500000	629	-0.292679	252	5	5	213	24.9163	0.524834	0.714369	24.0267
503	chr10	1500000	2000000	504	-0.312519	51	2	213	4	5.04259	0.209934	30.4321	0.451205
657	chr10	78500000	79000000	658	-0.34676	7	51	29	23	0.69212	5.35331	4.14334	2.59443
701	chr10	100500000	101000000	702	-0.346893	272	222	15	3	26.8938	23.3026	2.14311	0.338404
531	chr10	15500000	16000000	532	-0.353665	266	928	113	6	26.3006	97.4092	16.1447	0.676808
754	chr10	127000000	127500000	755	-0.367496	120	586	3	145	11.8649	61.5106	0.428621	16.3562
558	chr10	29000000	29500000	559	-0.373875	617	467	244	3	61.0055	49.0195	34.8612	0.338404
625	chr10	62500000	63000000	626	-0.386988	416	676	39	24	41.1317	70.9576	5.57208	2.70723
745	chr10	122500000	123000000	746	-0.396595	5	5	0	0	0.494372	0.524834	0	0
589	chr10	44500000	45000000	590	-0.439643	620	12	34	8	61.3021	1.2596	4.85771	0.902411
504	chr10	2000000	2500000	505	-0.440021	489	647	13	199	48.3496	67.9135	1.85736	22.4475
683	chr10	91500000	92000000	684	-0.444597	899	824	248	23	88.888	86.4927	35.4327	2.59443
521	chr10	10500000	11000000	522	-0.458581	11	277	50	12	1.08762	29.0758	7.14369	1.35362
547	chr10	23500000	24000000	548	-0.462988	204	141	61	242	20.1704	14.8003	8.7153	27.2979
737	chr10	118500000	119000000	738	-0.465634	33	1	2	1	3.26285	0.104967	0.285748	0.112801
509	chr10	4500000	5000000	510	-0.4759	616	6	64	48	60.9066	0.629801	9.14392	5.41446
736	chr10	118000000	118500000	737	-0.514921	233	234	100	1	23.0377	24.5622	14.2874	0.112801
623	chr10	61500000	62000000	624	-0.522769	21	501	4	831	2.07636	52.5884	0.571495	93.7379
556	chr10	28000000	28500000	557	-0.536666	583	1089	156	4	57.6437	114.309	22.2883	0.451205
746	chr10	123000000	123500000	747	-0.536898	51	1	171	99	5.04259	0.104967	24.4314	11.1673
620	chr10	60000000	60500000	621	-0.541091	5	9	82	5	0.494372	0.944701	11.7156	0.564007
532	chr10	16000000	16500000	533	-0.551458	4	1170	26	213	0.395497	122.811	3.71472	24.0267
542	chr10	21000000	21500000	543	-0.564998	8	5	23	115	0.790995	0.524834	3.2861	12.9722
552	chr10	26000000	26500000	553	-0.582363	72	359	51	80	7.11895	37.6831	7.28656	9.02411
755	chr10	127500000	128000000	756	-0.582797	197	2	90	48	19.4782	0.209934	12.8586	5.41446
655	chr10	77500000	78000000	656	-0.595079	128	27	184	1245	12.6559	2.8341	26.2888	140.438
684	chr10	92000000	92500000	685	-0.601786	79	88	8	9	7.81107	9.23708	1.14299	1.01521
575	chr10	37500000	38000000	576	-0.638953	398	7	284	23	39.352	0.734768	40.5761	2.59443
758	chr10	129000000	129500000	759	-0.647455	263	27	78	340	26.004	2.8341	11.1442	38.3525
671	chr10	85500000	86000000	672	-0.687732	102	900	53	2	10.0852	94.4701	7.57231	0.225603
757	chr10	128500000	129000000	758	-0.727982	522	965	10	2	51.6124	101.293	1.42874	0.225603
734	chr10	117000000	117500000	735	-0.729327	145	186	33	5	14.3368	19.5238	4.71483	0.564007
508	chr10	4000000	4500000	509	-0.73081	312	850	243	758	30.8488	89.2218	34.7183	85.5034
631	chr10	65500000	66000000	632	-0.746693	38	102	314	8	3.75723	10.7066	44.8624	0.902411
519	chr10	9500000	10000000	520	-0.755849	6	582	8	1	0.593246	61.0907	1.14299	0.112801
574	chr10	37000000	37500000	575	-0.761715	219	4	23	1	21.6535	0.419867	3.2861	0.112801
756	chr10	128000000	128500000	757	-0.765449	213	119	146	2227	21.0602	12.4911	20.8596	251.209
727	chr10	113500000	114000000	728	-0.780394	61	8	238	3043	6.03134	0.839734	34.004	343.254
572	chr10	36000000	36500000	573	-0.780698	639	454	47	2251	63.1807	47.6549	6.71507	253.916
674	chr10	87000000	87500000	675	-0.785612	691	11	204	8	68.3222	1.15463	29.1462	0.902411
520	chr10	10000000	10500000	521	-0.78653	0	7	288	4	0	0.734768	41.1476	0.451205
656	chr10	78000000	78500000	657	-0.787136	123	23	145	288	12.1615	2.41424	20.7167	32.4868
548	chr10	24000000	24500000	549	-0.795707	440	17	180	4	43.5047	1.78444	25.7173	0.451205
551	chr10	25500000	26000000	552	-0.804532	581	32	138	12	57.446	3.35894	19.7166	1.35362
638	chr10	69000000	69500000	639	-0.818973	34	17	12	531	3.36173	1.78444	1.71449	59.8975
622	chr10	61000000	61500000	623	-0.833655	317	1	20	16	31.3432	0.104967	2.85748	1.80482
538	chr10	19000000	19500000	539	-0.835338	243	28	16	18	24.0265	2.93907	2.28598	2.03042
619	chr10	59500000	60000000	620	-0.871632	28	8	40	1769	2.76848	0.839734	5.71495	199.546
540	chr10	20000000	20500000	541	-0.896532	3	2	28	25	0.296623	0.209934	4.00047	2.82003
673	chr10	86500000	87000000	674	-0.901872	397	224	9	2	39.2531	23.5126	1.28586	0.225603
541	chr10	20500000	21000000	542	-0.908251	17	5	210	8	1.68086	0.524834	30.0035	0.902411
726	chr10	113000000	113500000	727	-0.92352	8	1	36	1	0.790995	0.104967	5.14346	0.112801
624	chr10	62000000	62500000	625	-0.924562	176	4	99	1369	17.4019	0.419867	14.1445	154.425
616	chr10	58000000	58500000	617	-0.941401	566	227	26	216	55.9629	23.8275	3.71472	24.3651
614	chr10	57000000	57500000	615	-0.95243	13	3	11	3	1.28537	0.3149	1.57161	0.338404
539	chr10	19500000	20000000	540	-0.956903	75	447	53	2	7.41558	46.9202	7.57231	0.225603
609	chr10	54500000	55000000	610	-0.965823	67	4	150	11	6.62458	0.419867	21.4311	1.24081
613	chr10	56500000	57000000	614	-0.974066	56	2	36	0	5.53696	0.209934	5.14346	0
621	chr10	60500000	61000000	622	-0.975738	193	389	15	0	19.0827	40.8321	2.14311	0
615	chr10	57500000	58000000	616	-0.982532	479	1143	1	4	47.3608	119.977	0.142874	0.451205
573	chr10	36500000	37000000	574	-0.983204	1	1	20	57	0.0988743	0.104967	2.85748	6.42968
713	chr10	106500000	107000000	714	-0.998753	10	6	180	0	0.988743	0.629801	25.7173	0
611	chr10	55500000	56000000	612	-1.01999	2	22	11	1018	0.197749	2.30927	1.57161	114.832
665	chr10	82500000	83000000	666	-1.03371	163	3	3	1	16.1165	0.3149	0.428621	0.112801
618	chr10	59000000	59500000	619	-1.04157	9	25	426	2	0.889869	2.62417	60.8642	0.225603
612	chr10	56000000	56500000	613	-1.04549	15	9	11	3	1.48312	0.944701	1.57161	0.338404
635	chr10	67500000	68000000	636	-1.04918	1	94	127	1	0.0988743	9.86688	18.145	0.112801
722	chr10	111000000	111500000	723	-1.05398	8	531	270	7	0.790995	55.7374	38.5759	0.789609
721	chr10	110500000	111000000	722	-1.06557	23	6	13	60	2.27411	0.629801	1.85736	6.76808
720	chr10	110000000	110500000	721	-1.06753	847	10	211	283	83.7466	1.04967	30.1464	31.9228
632	chr10	66000000	66500000	633	-1.0757	67	69	100	2	6.62458	7.24271	14.2874	0.225603
617	chr10	58500000	59000000	618	-1.07809	69	0	6	16	6.82233	0	0.857243	1.80482
610	chr10	55000000	55500000	611	-1.0784	173	21	3	12	17.1053	2.2043	0.428621	1.35362
608	chr10	54000000	54500000	609	-1.07954	114	4	11	0	11.2717	0.419867	1.57161	0
633	chr10	66500000	67000000	634	-1.08475	118	962	89	175	11.6672	100.978	12.7158	19.7402
637	chr10	68500000	69000000	638	-1.09073	518	4	164	5	51.2169	0.419867	23.4313	0.564007
636	chr10	68000000	68500000	637	-1.11674	56	9	20	87	5.53696	0.944701	2.85748	9.81372
605	chr10	52500000	53000000	606	-1.12622	112	0	186	3293	11.0739	0	26.5745	371.455
607	chr10	53500000	54000000	608	-1.13672	20	2	1	151	1.97749	0.209934	0.142874	17.033
634	chr10	67000000	67500000	635	-1.14482	5	8	373	1	0.494372	0.839734	53.2919	0.112801
606	chr10	53000000	53500000	607	-1.14724	3	1	121	30	0.296623	0.104967	17.2877	3.38404
717	chr10	108500000	109000000	718	-1.16116	200	21	89	1	19.7749	2.2043	12.7158	0.112801
669	chr10	84500000	85000000	670	-1.1624	2	681	10	0	0.197749	71.4824	1.42874	0
719	chr10	109500000	110000000	720	-1.16546	208	6	17	4	20.5659	0.629801	2.42885	0.451205
718	chr10	109000000	109500000	719	-1.18508	45	2	122	0	4.44935	0.209934	17.4306	0
667	chr10	83500000	84000000	668	-1.19637	22	247	0	6	2.17524	25.9268	0	0.676808
668	chr10	84000000	84500000	669	-1.19795	72	455	15	3	7.11895	47.7599	2.14311	0.338404
670	chr10	85000000	85500000	671	-1.2208	6	2	2	6	0.593246	0.209934	0.285748	0.676808
716	chr10	108000000	108500000	717	-1.2232	2	63	279	0	0.197749	6.61291	39.8618	0
715	chr10	107500000	108000000	716	-1.24847	198	832	5	8	19.5771	87.3324	0.714369	0.902411
666	chr10	83000000	83500000	667	-1.27498	856	4	5	2	84.6364	0.419867	0.714369	0.225603
714	chr10	107000000	107500000	715	-1.28981	29	17	140	4	2.86736	1.78444	20.0023	0.451205
773	chr11	500000	1000000	774	1.03936	14	0	2	1	1.38424	0	0.285748	0.112801
1009	chr11	118500000	119000000	1010	1.03343	360	5	346	467	35.5948	0.524834	49.4343	52.6782
1008	chr11	118000000	118500000	1009	1.01376	57	90	276	39	5.63584	9.44701	39.4332	4.39925
772	chr11	0	500000	773	0.9886	7	0	125	5	0.69212	0	17.8592	0.564007
778	chr11	3000000	3500000	779	0.861166	3	3	0	0	0.296623	0.3149	0	0
865	chr11	46500000	47000000	866	0.858994	318	9	156	2	31.442	0.944701	22.2883	0.225603
894	chr11	61000000	61500000	895	0.856434	171	1	125	38	16.9075	0.104967	17.8592	4.28645
779	chr11	3500000	4000000	780	0.854499	517	1	6	2	51.118	0.104967	0.857243	0.225603
864	chr11	46000000	46500000	865	0.844035	1	5	61	1	0.0988743	0.524834	8.7153	0.112801
1010	chr11	119000000	119500000	1011	0.824457	0	2	2	94	0	0.209934	0.285748	10.6033
1040	chr11	134000000	134500000	1041	0.818112	2	2	221	0	0.197749	0.209934	31.5751	0
895	chr11	61500000	62000000	896	0.814996	45	3	1	1	4.44935	0.3149	0.142874	0.112801
775	chr11	1500000	2000000	776	0.801944	7	212	1	93	0.69212	22.253	0.142874	10.4905
919	chr11	73500000	74000000	920	0.79274	0	15	225	706	0	1.5745	32.1466	79.6377
896	chr11	62000000	62500000	897	0.790252	312	2	59	0	30.8488	0.209934	8.42955	0
774	chr11	1000000	1500000	775	0.783701	0	0	84	3	0	0	12.0014	0.338404
866	chr11	47000000	47500000	867	0.766584	1	0	126	0	0.0988743	0	18.0021	0
918	chr11	73000000	73500000	919	0.763982	2	7	2	1	0.197749	0.734768	0.285748	0.112801
790	chr11	9000000	9500000	791	0.812729	4	4	84	2474	0.395497	0.419867	12.0014	279.07
1030	chr11	129000000	129500000	1031	-0.189713	11	5	417	1190	1.08762	0.524834	59.5784	134.234
915	chr11	71500000	72000000	916	0.759327	3	7	92	2	0.296623	0.734768	13.1444	0.225603
899	chr11	63500000	64000000	900	0.74916	328	1	67	0	32.4308	0.104967	9.57254	0
900	chr11	64000000	64500000	901	0.745823	1	98	212	0	0.0988743	10.2867	30.2892	0
840	chr11	34000000	34500000	841	0.742385	213	9	15	2012	21.0602	0.944701	2.14311	226.956
916	chr11	72000000	72500000	917	0.740232	139	0	119	2	13.7435	0	17.002	0.225603
917	chr11	72500000	73000000	918	0.736655	159	2	3	2	15.721	0.209934	0.428621	0.225603
1005	chr11	116500000	117000000	1006	0.732704	774	0	34	7	76.5287	0	4.85771	0.789609
906	chr11	67000000	67500000	907	0.728995	359	2	227	5	35.4959	0.209934	32.4323	0.564007
980	chr11	104000000	104500000	981	-0.802221	411	600	2	0	40.6374	62.9801	0.285748	0
815	chr11	21500000	22000000	816	-0.867993	4	1	207	732	0.395497	0.104967	29.5749	82.5706
954	chr11	91000000	91500000	955	-0.938503	0	1	377	316	0	0.104967	53.8634	35.6452
907	chr11	67500000	68000000	908	0.715662	27	0	135	2	2.66961	0	19.288	0.225603
933	chr11	80500000	81000000	934	-1.08934	440	442	4	0	43.5047	46.3953	0.571495	0
1007	chr11	117500000	118000000	1008	0.710341	10	6	489	89	0.988743	0.629801	69.8653	10.0393
901	chr11	64500000	65000000	902	0.708978	3	6	137	0	0.296623	0.629801	19.5737	0
893	chr11	60500000	61000000	894	0.706587	2	1	39	2	0.197749	0.104967	5.57208	0.225603
920	chr11	74000000	74500000	921	0.69516	14	9	27	3	1.38424	0.944701	3.85759	0.338404
914	chr11	71000000	71500000	915	0.689503	66	37	57	4	6.52571	3.88377	8.1438	0.451205
902	chr11	65000000	65500000	903	0.686632	0	20	53	13	0	2.09934	7.57231	1.46642
904	chr11	66000000	66500000	905	0.685795	1	1432	1	5	0.0988743	150.312	0.142874	0.564007
908	chr11	68000000	68500000	909	0.680945	7	5	31	6	0.69212	0.524834	4.42909	0.676808
903	chr11	65500000	66000000	904	0.67356	8	3	20	3	0.790995	0.3149	2.85748	0.338404
897	chr11	62500000	63000000	898	0.672523	5	74	12	10	0.494372	7.76754	1.71449	1.12801
898	chr11	63000000	63500000	899	0.672018	72	23	65	7	7.11895	2.41424	9.28679	0.789609
909	chr11	68500000	69000000	910	0.667994	14	14	131	9	1.38424	1.46954	18.7165	1.01521
905	chr11	66500000	67000000	906	0.661666	168	1	77	0	16.6109	0.104967	11.0013	0
793	chr11	10500000	11000000	794	0.64729	60	9	325	1	5.93246	0.944701	46.434	0.112801
1006	chr11	117000000	117500000	1007	0.645175	2	3	47	2	0.197749	0.3149	6.71507	0.225603
776	chr11	2000000	2500000	777	0.639427	15	3	2	2	1.48312	0.3149	0.285748	0.225603
863	chr11	45500000	46000000	864	0.634835	2	228	117	2	0.197749	23.9324	16.7162	0.225603
922	chr11	75000000	75500000	923	0.632465	40	8	8	2	3.95497	0.839734	1.14299	0.225603
791	chr11	9500000	10000000	792	0.624236	6	3	123	1	0.593246	0.3149	17.5735	0.112801
862	chr11	45000000	45500000	863	0.621556	602	2	291	1	59.5224	0.209934	41.5763	0.112801
995	chr11	111500000	112000000	996	0.593637	708	90	68	31	70.003	9.44701	9.71542	3.49684
867	chr11	47500000	48000000	868	0.586434	2	19	489	3	0.197749	1.99437	69.8653	0.338404
806	chr11	17000000	17500000	807	0.579248	722	5	88	41	71.3873	0.524834	12.5729	4.62485
927	chr11	77500000	78000000	928	0.574117	203	5	257	429	20.0715	0.524834	36.7186	48.3918
792	chr11	10000000	10500000	793	0.568875	563	4	201	171	55.6663	0.419867	28.7176	19.289
1023	chr11	125500000	126000000	1024	0.544095	303	5	229	61	29.9589	0.524834	32.7181	6.88088
923	chr11	75500000	76000000	924	0.53388	4	212	215	82	0.395497	22.253	30.7179	9.24971
921	chr11	74500000	75000000	922	0.531697	10	148	39	0	0.988743	15.5351	5.57208	0
1028	chr11	128000000	128500000	1029	0.531625	12	11	792	1042	1.18649	1.15463	113.156	117.539
924	chr11	76000000	76500000	925	0.530168	14	1	14	42	1.38424	0.104967	2.00023	4.73766
910	chr11	69000000	69500000	911	0.524588	59	39	79	34	5.83359	4.09371	11.287	3.83525
842	chr11	35000000	35500000	843	0.512377	13	54	566	85	1.28537	5.66821	80.8665	9.58811
925	chr11	76500000	77000000	926	0.511924	9	23	288	4	0.889869	2.41424	41.1476	0.451205
1041	chr11	134500000	135000000	1042	0.511007	463	1	341	3	45.7788	0.104967	48.72	0.338404
777	chr11	2500000	3000000	778	0.501653	222	4	11	7	21.9501	0.419867	1.57161	0.789609
912	chr11	70000000	70500000	913	0.491666	16	1	131	2	1.58199	0.104967	18.7165	0.225603
837	chr11	32500000	33000000	838	0.483246	17	972	152	6	1.68086	102.028	21.7168	0.676808
808	chr11	18000000	18500000	809	0.481664	788	53	191	1	77.913	5.56324	27.2889	0.112801
926	chr11	77000000	77500000	927	0.473802	204	178	300	2	20.1704	18.6841	42.8621	0.225603
911	chr11	69500000	70000000	912	0.468546	8	4	8	3	0.790995	0.419867	1.14299	0.338404
789	chr11	8500000	9000000	790	0.465162	739	19	161	903	73.0681	1.99437	23.0027	101.86
913	chr11	70500000	71000000	914	0.445113	0	4	88	268	0	0.419867	12.5729	30.2308
1021	chr11	124500000	125000000	1022	0.443053	103	0	4	0	10.1841	0	0.571495	0
838	chr11	33000000	33500000	839	0.412808	10	4	196	2	0.988743	0.419867	28.0033	0.225603
1011	chr11	119500000	120000000	1012	0.393558	159	49	58	4	15.721	5.14337	8.28668	0.451205
1022	chr11	125000000	125500000	1023	0.387077	72	2	12	0	7.11895	0.209934	1.71449	0
836	chr11	32000000	32500000	837	0.353942	25	1707	342	1024	2.47186	179.178	48.8628	115.509
958	chr11	93000000	93500000	959	0.353886	1716	26	139	41	169.668	2.72914	19.8595	4.62485
795	chr11	11500000	12000000	796	0.341256	206	0	249	1	20.3681	0	35.5756	0.112801
1024	chr11	126000000	126500000	1025	0.335039	1	0	63	0	0.0988743	0	9.00105	0
886	chr11	57000000	57500000	887	0.324808	4	169	98	5	0.395497	17.7394	14.0016	0.564007
839	chr11	33500000	34000000	840	0.313044	38	23	484	1211	3.75723	2.41424	69.1509	136.602
999	chr11	113500000	114000000	1000	0.310368	945	470	599	3	93.4363	49.3344	85.5814	0.338404
1000	chr11	114000000	114500000	1001	0.301508	45	918	27	3	4.44935	96.3595	3.85759	0.338404
861	chr11	44500000	45000000	862	0.289326	27	0	95	331	2.66961	0	13.573	37.3372
1031	chr11	129500000	130000000	1032	0.260375	1	1137	591	1	0.0988743	119.347	84.4384	0.112801
794	chr11	11000000	11500000	795	0.249909	225	1	43	0	22.2467	0.104967	6.14357	0
961	chr11	94500000	95000000	962	0.248488	12	0	37	668	1.18649	0	5.28633	75.3513
1001	chr11	114500000	115000000	1002	0.237217	52	78	608	4	5.14147	8.18741	86.8672	0.451205
996	chr11	112000000	112500000	997	0.225039	148	1386	175	781	14.6334	145.484	25.0029	88.0978
841	chr11	34500000	35000000	842	0.219218	113	53	2	651	11.1728	5.56324	0.285748	73.4337
809	chr11	18500000	19000000	810	0.216787	188	594	317	86	18.5884	62.3503	45.291	9.70091
796	chr11	12000000	12500000	797	0.206043	108	3	486	322	10.6784	0.3149	69.4366	36.322
1032	chr11	130000000	130500000	1033	0.205533	432	384	126	1	42.7137	40.3073	18.0021	0.112801
1039	chr11	133500000	134000000	1040	0.199015	172	18	246	21	17.0064	1.8894	35.1469	2.36883
1014	chr11	121000000	121500000	1015	0.193065	774	2	300	52	76.5287	0.209934	42.8621	5.86567
988	chr11	108000000	108500000	989	0.189569	250	810	73	463	24.7186	85.0231	10.4298	52.227
1017	chr11	122500000	123000000	1018	0.177539	36	1	26	123	3.55948	0.104967	3.71472	13.8746
1029	chr11	128500000	129000000	1030	0.151127	12	1	554	5	1.18649	0.104967	79.1521	0.564007
960	chr11	94000000	94500000	961	0.14184	24	4	125	200	2.37298	0.419867	17.8592	22.5603
800	chr11	14000000	14500000	801	0.133934	5	47	230	48	0.494372	4.93344	32.861	5.41446
807	chr11	17500000	18000000	808	0.112309	155	81	51	1	15.3255	8.50231	7.28656	0.112801
937	chr11	82500000	83000000	938	0.0939765	297	4	5	1	29.3657	0.419867	0.714369	0.112801
780	chr11	4000000	4500000	781	0.0880656	15	732	189	98	1.48312	76.8357	27.0031	11.0545
788	chr11	8000000	8500000	789	0.0817264	72	223	67	111	7.11895	23.4076	9.57254	12.5209
1012	chr11	120000000	120500000	1013	0.0635689	26	6	13	2	2.57073	0.629801	1.85736	0.225603
785	chr11	6500000	7000000	786	0.0614888	143	6	35	2	14.139	0.629801	5.00058	0.225603
943	chr11	85500000	86000000	944	0.0465606	17	280	191	6	1.68086	29.3907	27.2889	0.676808
798	chr11	13000000	13500000	799	0.0261149	18	2	133	15	1.77974	0.209934	19.0022	1.69202
797	chr11	12500000	13000000	798	0.0251753	142	178	107	1	14.0402	18.6841	15.2875	0.112801
801	chr11	14500000	15000000	802	0.0156809	28	122	86	22	2.76848	12.806	12.2871	2.48163
994	chr11	111000000	111500000	995	0.0148209	267	493	28	0	26.3995	51.7486	4.00047	0
963	chr11	95500000	96000000	964	0.00804806	792	4	144	10	78.3085	0.419867	20.5738	1.12801
976	chr11	102000000	102500000	977	-0.00394816	41	2	513	2	4.05385	0.209934	73.2942	0.225603
1034	chr11	131000000	131500000	1035	-0.0169102	33	466	161	3	3.26285	48.9145	23.0027	0.338404
928	chr11	78000000	78500000	929	-0.0277198	11	2	171	177	1.08762	0.209934	24.4314	19.9658
860	chr11	44000000	44500000	861	-0.0347454	3	1	128	1	0.296623	0.104967	18.2878	0.112801
844	chr11	36000000	36500000	845	-0.0507309	8	1334	85	7	0.790995	140.026	12.1443	0.789609
989	chr11	108500000	109000000	990	-0.0516266	223	6	43	4	22.049	0.629801	6.14357	0.451205
987	chr11	107500000	108000000	988	-0.0643058	23	6	13	72	2.27411	0.629801	1.85736	8.1217
784	chr11	6000000	6500000	785	-0.080162	13	3	206	14	1.28537	0.3149	29.432	1.57922
1004	chr11	116000000	116500000	1005	-0.0824742	561	423	23	1	55.4685	44.401	3.2861	0.112801
959	chr11	93500000	94000000	960	-0.0923491	101	35	19	95	9.98631	3.67384	2.7146	10.7161
1002	chr11	115000000	115500000	1003	-0.100429	98	2	66	3	9.68969	0.209934	9.42967	0.338404
845	chr11	36500000	37000000	846	-0.132408	311	2182	185	41	30.7499	229.038	26.4316	4.62485
835	chr11	31500000	32000000	836	-0.134348	419	0	177	0	41.4284	0	25.2887	0
828	chr11	28000000	28500000	829	-0.146019	436	3	199	9	43.1092	0.3149	28.4319	1.01521
1013	chr11	120500000	121000000	1014	-0.146478	38	177	0	1	3.75723	18.5791	0	0.112801
945	chr11	86500000	87000000	946	-0.150436	88	74	78	61	8.70094	7.76754	11.1442	6.88088
978	chr11	103000000	103500000	979	-0.153586	121	1243	290	87	11.9638	130.474	41.4334	9.81372
859	chr11	43500000	44000000	860	-0.158492	1549	2	351	0	153.156	0.209934	50.1487	0
890	chr11	59000000	59500000	891	-0.159334	57	56	45	1824	5.63584	5.87814	6.42932	205.75
992	chr11	110000000	110500000	993	-0.180064	141	626	75	6	13.9413	65.7092	10.7155	0.676808
1033	chr11	130500000	131000000	1034	-0.188195	605	6	284	8	59.819	0.629801	40.5761	0.902411
944	chr11	86000000	86500000	945	-0.190817	332	5	528	6	32.8263	0.524834	75.4373	0.676808
799	chr11	13500000	14000000	800	-0.192349	30	10	152	21	2.96623	1.04967	21.7168	2.36883
957	chr11	92500000	93000000	958	-0.221583	44	1365	61	1	4.35047	143.28	8.7153	0.112801
1003	chr11	115500000	116000000	1004	-0.260345	28	2	225	1	2.76848	0.209934	32.1466	0.112801
998	chr11	113000000	113500000	999	-0.261552	8	1	1	3	0.790995	0.104967	0.142874	0.338404
843	chr11	35500000	36000000	844	-0.265432	94	357	33	10	9.29419	37.4732	4.71483	1.12801
810	chr11	19000000	19500000	811	-0.269492	13	3	294	358	1.28537	0.3149	42.0049	40.3829
948	chr11	88000000	88500000	949	-0.275009	982	35	35	1	97.0946	3.67384	5.00058	0.112801
1025	chr11	126500000	127000000	1026	-0.305741	152	10	2	2	15.0289	1.04967	0.285748	0.225603
964	chr11	96000000	96500000	965	-0.311736	133	12	42	45	13.1503	1.2596	6.0007	5.07606
962	chr11	95000000	95500000	963	-0.324385	902	175	4	28	89.1847	18.3692	0.571495	3.15844
868	chr11	48000000	48500000	869	-0.329834	260	14	40	404	25.7073	1.46954	5.71495	45.5717
805	chr11	16500000	17000000	806	-0.331791	207	92	183	4	20.467	9.65695	26.1459	0.451205
1035	chr11	131500000	132000000	1036	-0.334559	24	0	402	33	2.37298	0	57.4353	3.72244
1018	chr11	123000000	123500000	1019	-0.374183	702	6	145	2	69.4098	0.629801	20.7167	0.225603
997	chr11	112500000	113000000	998	-0.376712	697	3	64	8	68.9154	0.3149	9.14392	0.902411
984	chr11	106000000	106500000	985	-0.407757	190	31	2	3	18.7861	3.25397	0.285748	0.338404
986	chr11	107000000	107500000	987	-0.415667	5	820	0	3	0.494372	86.0728	0	0.338404
889	chr11	58500000	59000000	890	-0.421629	49	474	16	71	4.84484	49.7543	2.28598	8.00889
834	chr11	31000000	31500000	835	-0.424103	59	17	2	8	5.83359	1.78444	0.285748	0.902411
833	chr11	30500000	31000000	834	-0.436292	277	100	4	274	27.3882	10.4967	0.571495	30.9076
812	chr11	20000000	20500000	813	-0.443134	1066	698	80	48	105.4	73.2668	11.4299	5.41446
888	chr11	58000000	58500000	889	-0.453759	21	4	79	1307	2.07636	0.419867	11.287	147.431
826	chr11	27000000	27500000	827	-0.467688	335	1120	190	39	33.1229	117.563	27.146	4.39925
891	chr11	59500000	60000000	892	-0.485131	15	276	223	179	1.48312	28.9708	31.8608	20.1914
977	chr11	102500000	103000000	978	-0.497347	41	28	100	151	4.05385	2.93907	14.2874	17.033
1020	chr11	124000000	124500000	1021	-0.500517	237	3	23	0	23.4332	0.3149	3.2861	0
827	chr11	27500000	28000000	828	-0.510337	14	611	64	284	1.38424	64.1347	9.14392	32.0356
1038	chr11	133000000	133500000	1039	-0.52309	705	475	69	1	69.7064	49.8592	9.85829	0.112801
1027	chr11	127500000	128000000	1028	-0.5277	371	365	314	325	36.6824	38.3129	44.8624	36.6604
942	chr11	85000000	85500000	943	-0.529133	1401	1087	24	52	138.523	114.099	3.42897	5.86567
887	chr11	57500000	58000000	888	-0.530904	98	4	148	613	9.68969	0.419867	21.1453	69.1472
892	chr11	60000000	60500000	893	-0.540096	220	12	107	3	21.7524	1.2596	15.2875	0.338404
832	chr11	30000000	30500000	833	-0.553348	29	8	298	3	2.86736	0.839734	42.5764	0.338404
811	chr11	19500000	20000000	812	-0.561509	122	1	94	174	12.0627	0.104967	13.4301	19.6274
956	chr11	92000000	92500000	957	-0.57518	117	4	158	3	11.5683	0.419867	22.5741	0.338404
1016	chr11	122000000	122500000	1017	-0.596207	15	0	186	3	1.48312	0	26.5745	0.338404
991	chr11	109500000	110000000	992	-0.604852	320	48	4	49	31.6398	5.03841	0.571495	5.52726
947	chr11	87500000	88000000	948	-0.609425	25	5	13	50	2.47186	0.524834	1.85736	5.64007
858	chr11	43000000	43500000	859	-0.61274	122	172	98	7	12.0627	18.0543	14.0016	0.789609
983	chr11	105500000	106000000	984	-0.630175	179	1170	3	3	17.6985	122.811	0.428621	0.338404
783	chr11	5500000	6000000	784	-0.633595	203	654	133	4	20.0715	68.6483	19.0022	0.451205
949	chr11	88500000	89000000	950	-0.643307	201	5	2	51	19.8737	0.524834	0.285748	5.75287
787	chr11	7500000	8000000	788	-0.653122	150	27	30	1455	14.8312	2.8341	4.28621	164.126
985	chr11	106500000	107000000	986	-0.660075	308	523	31	989	30.4533	54.8976	4.42909	111.561
882	chr11	55000000	55500000	883	-0.662277	14	9	10	8	1.38424	0.944701	1.42874	0.902411
1037	chr11	132500000	133000000	1038	-0.672368	248	72	0	13	24.5208	7.55761	0	1.46642
938	chr11	83000000	83500000	939	-0.692017	79	6	6	1	7.81107	0.629801	0.857243	0.112801
975	chr11	101500000	102000000	976	-0.692796	103	600	484	105	10.1841	62.9801	69.1509	11.8441
850	chr11	39000000	39500000	851	-0.698762	21	131	94	2	2.07636	13.7507	13.4301	0.225603
849	chr11	38500000	39000000	850	-0.704744	152	5	4	1	15.0289	0.524834	0.571495	0.112801
969	chr11	98500000	99000000	970	-0.705764	16	7	14	1	1.58199	0.734768	2.00023	0.112801
973	chr11	100500000	101000000	974	-0.706635	309	9	14	20	30.5522	0.944701	2.00023	2.25603
1019	chr11	123500000	124000000	1020	-0.709608	25	10	13	1026	2.47186	1.04967	1.85736	115.734
946	chr11	87000000	87500000	947	-0.710961	28	14	43	1983	2.76848	1.46954	6.14357	223.685
813	chr11	20500000	21000000	814	-0.714668	652	300	565	52	64.4661	31.49	80.7237	5.86567
929	chr11	78500000	79000000	930	-0.717793	702	4	14	10	69.4098	0.419867	2.00023	1.12801
829	chr11	28500000	29000000	830	-0.722355	440	1	578	15	43.5047	0.104967	82.581	1.69202
1036	chr11	132000000	132500000	1037	-0.725115	91	5	53	2	8.99757	0.524834	7.57231	0.225603
966	chr11	97000000	97500000	967	-0.734654	72	39	5	1	7.11895	4.09371	0.714369	0.112801
936	chr11	82000000	82500000	937	-0.754623	71	6	3	1263	7.02008	0.629801	0.428621	142.468
1015	chr11	121500000	122000000	1016	-0.754961	16	8	96	7	1.58199	0.839734	13.7159	0.789609
967	chr11	97500000	98000000	968	-0.755114	205	17	5	1	20.2692	1.78444	0.714369	0.112801
831	chr11	29500000	30000000	832	-0.756876	134	19	8	2	13.2492	1.99437	1.14299	0.225603
993	chr11	110500000	111000000	994	-0.75955	603	0	217	0	59.6212	0	31.0036	0
965	chr11	96500000	97000000	966	-0.764488	27	11	171	35	2.66961	1.15463	24.4314	3.94805
781	chr11	4500000	5000000	782	-0.773055	714	388	223	7	70.5963	40.7271	31.8608	0.789609
848	chr11	38000000	38500000	849	-0.775505	56	1	71	329	5.53696	0.104967	10.144	37.1116
846	chr11	37000000	37500000	847	-0.77754	65	30	70	1086	6.42683	3.149	10.0012	122.502
968	chr11	98000000	98500000	969	-0.778937	232	6	141	11	22.9388	0.629801	20.1452	1.24081
817	chr11	22500000	23000000	818	-0.780832	30	187	83	935	2.96623	19.6288	11.8585	105.469
852	chr11	40000000	40500000	853	-0.782909	399	217	12	344	39.4509	22.7778	1.71449	38.8037
885	chr11	56500000	57000000	886	-0.789473	46	447	27	7	4.54822	46.9202	3.85759	0.789609
952	chr11	90000000	90500000	953	-0.789502	21	226	36	3	2.07636	23.7225	5.14346	0.338404
847	chr11	37500000	38000000	848	-0.789524	512	1	249	0	50.6237	0.104967	35.5756	0
851	chr11	39500000	40000000	852	-0.797059	12	4	374	7	1.18649	0.419867	53.4348	0.789609
981	chr11	104500000	105000000	982	-0.798067	5	5	14	2	0.494372	0.524834	2.00023	0.225603
941	chr11	84500000	85000000	942	-0.800607	8	1072	10	0	0.790995	112.524	1.42874	0
819	chr11	23500000	24000000	820	-0.801469	20	92	98	0	1.97749	9.65695	14.0016	0
990	chr11	109000000	109500000	991	-0.811564	324	5	23	77	32.0353	0.524834	3.2861	8.6857
820	chr11	24000000	24500000	821	-0.813535	24	18	351	3	2.37298	1.8894	50.1487	0.338404
821	chr11	24500000	25000000	822	-0.815218	51	5	42	2	5.04259	0.524834	6.0007	0.225603
830	chr11	29000000	29500000	831	-0.815936	8	2	10	1	0.790995	0.209934	1.42874	0.112801
824	chr11	26000000	26500000	825	-0.818418	76	4	17	14	7.51445	0.419867	2.42885	1.57922
971	chr11	99500000	100000000	972	-0.828798	205	0	2	54	20.2692	0	0.285748	6.09127
970	chr11	99000000	99500000	971	-0.829006	193	296	90	2	19.0827	31.0702	12.8586	0.225603
979	chr11	103500000	104000000	980	-0.830747	90	8	107	1032	8.89869	0.839734	15.2875	116.411
972	chr11	100000000	100500000	973	-0.836001	25	10	26	5	2.47186	1.04967	3.71472	0.564007
823	chr11	25500000	26000000	824	-0.843366	124	56	28	8	12.2604	5.87814	4.00047	0.902411
955	chr11	91500000	92000000	956	-0.847352	438	146	522	506	43.307	15.3252	74.5801	57.0775
802	chr11	15000000	15500000	803	-0.847556	67	0	3	4	6.62458	0	0.428621	0.451205
940	chr11	84000000	84500000	941	-0.849927	56	1068	262	2	5.53696	112.105	37.4329	0.225603
822	chr11	25000000	25500000	823	-0.85798	29	3	32	5	2.86736	0.3149	4.57196	0.564007
816	chr11	22000000	22500000	817	-0.858461	220	14	248	3	21.7524	1.46954	35.4327	0.338404
825	chr11	26500000	27000000	826	-0.866797	501	406	2	56	49.536	42.6165	0.285748	6.31687
818	chr11	23000000	23500000	819	-0.870681	140	15	9	3	13.8424	1.5745	1.28586	0.338404
974	chr11	101000000	101500000	975	-0.873514	436	0	8	2	43.1092	0	1.14299	0.225603
1026	chr11	127000000	127500000	1027	-0.885631	72	0	20	355	7.11895	0	2.85748	40.0445
786	chr11	7000000	7500000	787	-0.88902	333	2	2	944	32.9252	0.209934	0.285748	106.484
950	chr11	89000000	89500000	951	-0.921522	887	29	140	500	87.7015	3.04404	20.0023	56.4007
930	chr11	79000000	79500000	931	-0.928219	1057	3	7	0	104.51	0.3149	1.00012	0
939	chr11	83500000	84000000	940	-0.933611	561	139	95	18	55.4685	14.5904	13.573	2.03042
982	chr11	105000000	105500000	983	-0.935961	282	0	3	0	27.8826	0	0.428621	0
854	chr11	41000000	41500000	855	-0.936829	181	0	3	1	17.8963	0	0.428621	0.112801
853	chr11	40500000	41000000	854	-0.950325	439	9	1	7	43.4058	0.944701	0.142874	0.789609
953	chr11	90500000	91000000	954	-0.956288	16	7	306	4	1.58199	0.734768	43.7194	0.451205
857	chr11	42500000	43000000	858	-0.98853	22	4	2	760	2.17524	0.419867	0.285748	85.729
883	chr11	55500000	56000000	884	-0.992789	2	1	69	10	0.197749	0.104967	9.85829	1.12801
782	chr11	5000000	5500000	783	-1.01532	38	34	11	591	3.75723	3.56887	1.57161	66.6656
855	chr11	41500000	42000000	856	-1.01967	496	0	15	738	49.0417	0	2.14311	83.2474
814	chr11	21000000	21500000	815	-1.02704	279	373	132	20	27.5859	39.1526	18.8593	2.25603
803	chr11	15500000	16000000	804	-1.03697	118	0	81	0	11.6672	0	11.5728	0
804	chr11	16000000	16500000	805	-1.04075	18	4	205	44	1.77974	0.419867	29.2891	4.96326
935	chr11	81500000	82000000	936	-1.04626	6	4	218	9	0.593246	0.419867	31.1465	1.01521
856	chr11	42000000	42500000	857	-1.0464	190	1	15	232	18.7861	0.104967	2.14311	26.1699
870	chr11	49000000	49500000	871	-1.05226	325	3	87	3	32.1342	0.3149	12.43	0.338404
931	chr11	79500000	80000000	932	-1.05846	11	4	264	0	1.08762	0.419867	37.7187	0
934	chr11	81000000	81500000	935	-1.06451	156	79	5	0	15.4244	8.29238	0.714369	0
932	chr11	80000000	80500000	933	-1.14025	2	14	56	1	0.197749	1.46954	8.00093	0.112801
884	chr11	56000000	56500000	885	-1.14417	43	678	23	721	4.2516	71.1675	3.2861	81.3298
1056	chr12	6500000	7000000	1057	1.03537	1	1	5	0	0.0988743	0.104967	0.714369	0
1141	chr12	49000000	49500000	1142	1.00931	1	109	41	7	0.0988743	11.4414	5.85782	0.789609
1142	chr12	49500000	50000000	1143	0.99097	0	257	75	2	0	26.9765	10.7155	0.225603
1150	chr12	53500000	54000000	1151	0.944752	155	0	21	0	15.3255	0	3.00035	0
1284	chr12	120500000	121000000	1285	0.941102	729	3	89	2	72.0794	0.3149	12.7158	0.225603
1157	chr12	57000000	57500000	1158	0.938716	6	0	212	0	0.593246	0	30.2892	0
1143	chr12	50000000	50500000	1144	0.921146	503	0	4	42	49.7338	0	0.571495	4.73766
1156	chr12	56500000	57000000	1157	0.911561	91	243	127	2	8.99757	25.5069	18.145	0.225603
1285	chr12	121000000	121500000	1286	0.881236	1050	23	310	1	103.818	2.41424	44.2909	0.112801
1287	chr12	122000000	122500000	1288	0.877166	0	9	31	1	0	0.944701	4.42909	0.112801
1290	chr12	123500000	124000000	1291	0.869655	5	1078	54	189	0.494372	113.154	7.71518	21.3195
1264	chr12	110500000	111000000	1265	0.867467	116	281	125	609	11.4694	29.4957	17.8592	68.696
1288	chr12	122500000	123000000	1289	0.866384	0	764	64	3	0	80.1946	9.14392	0.338404
1286	chr12	121500000	122000000	1287	0.854473	1	5	1	0	0.0988743	0.524834	0.142874	0
1289	chr12	123000000	123500000	1290	0.851073	6	5	1	0	0.593246	0.524834	0.142874	0
1267	chr12	112000000	112500000	1268	0.839121	4	10	42	19	0.395497	1.04967	6.0007	2.14323
1144	chr12	50500000	51000000	1145	0.83268	368	0	73	946	36.3858	0	10.4298	106.71
1263	chr12	110000000	110500000	1264	0.808576	45	104	38	5	4.44935	10.9165	5.4292	0.564007
1149	chr12	53000000	53500000	1150	0.806643	104	182	431	843	10.2829	19.104	61.5786	95.0915
1057	chr12	7000000	7500000	1058	0.805947	16	6	354	353	1.58199	0.629801	50.5773	39.8189
1044	chr12	500000	1000000	1045	0.803536	672	31	335	2	66.4436	3.25397	47.8627	0.225603
1291	chr12	124000000	124500000	1292	0.793836	10	10	60	0	0.988743	1.04967	8.57243	0
1146	chr12	51500000	52000000	1147	0.790417	8	3	36	9	0.790995	0.3149	5.14346	1.01521
1147	chr12	52000000	52500000	1148	0.789543	0	0	24	0	0	0	3.42897	0
1268	chr12	112500000	113000000	1269	0.780452	414	3	167	78	40.934	0.3149	23.8599	8.7985
1145	chr12	51000000	51500000	1146	0.780289	76	194	10	8	7.51445	20.3636	1.42874	0.902411
1155	chr12	56000000	56500000	1156	0.77775	1	77	76	0	0.0988743	8.08244	10.8584	0
1152	chr12	54500000	55000000	1153	0.771339	161	3	41	0	15.9188	0.3149	5.85782	0
1062	chr12	9500000	10000000	1063	0.750382	858	39	274	268	84.8342	4.09371	39.1474	30.2308
1283	chr12	120000000	120500000	1284	0.748077	45	9	91	3	4.44935	0.944701	13.0015	0.338404
1293	chr12	125000000	125500000	1294	0.74465	1	12	29	0	0.0988743	1.2596	4.14334	0
1262	chr12	109500000	110000000	1263	0.737312	132	12	8	4	13.0514	1.2596	1.14299	0.451205
1292	chr12	124500000	125000000	1293	0.726715	19	0	0	0	1.87861	0	0	0
1308	chr12	132500000	133000000	1309	0.721464	2	0	1	1	0.197749	0	0.142874	0.112801
1261	chr12	109000000	109500000	1262	0.715288	20	3	95	3	1.97749	0.3149	13.573	0.338404
1139	chr12	48000000	48500000	1140	0.704052	3	747	3	3	0.296623	78.4102	0.428621	0.338404
1151	chr12	54000000	54500000	1152	0.703588	474	32	3	14	46.8664	3.35894	0.428621	1.57922
1158	chr12	57500000	58000000	1159	0.888041	0	0	2	1196	0	0	0.285748	134.91
1265	chr12	111000000	111500000	1266	0.717051	2	0	200	906	0.197749	0	28.5748	102.198
1059	chr12	8000000	8500000	1060	0.716631	6	1	97	1262	0.593246	0.104967	13.8588	142.355
1097	chr12	27000000	27500000	1098	0.668826	200	105	432	5	19.7749	11.0215	61.7215	0.564007
1309	chr12	133000000	133500000	1310	0.668178	0	2	18	0	0	0.209934	2.57173	0
1266	chr12	111500000	112000000	1267	0.658072	0	1462	2	1	0	153.461	0.285748	0.112801
1180	chr12	68500000	69000000	1181	0.653567	19	1	79	0	1.87861	0.104967	11.287	0
1234	chr12	95500000	96000000	1235	0.651107	2	7	201	2	0.197749	0.734768	28.7176	0.225603
1301	chr12	129000000	129500000	1302	0.111659	2	1	61	545	0.197749	0.104967	8.7153	61.4767
1148	chr12	52500000	53000000	1149	0.6467	755	13	677	1	74.6501	1.36457	96.7255	0.112801
1212	chr12	84500000	85000000	1213	-0.839474	5	1097	1	0	0.494372	115.149	0.142874	0
1245	chr12	101000000	101500000	1246	-0.942726	7	2	172	1327	0.69212	0.209934	24.5743	149.687
1055	chr12	6000000	6500000	1056	0.638042	327	0	132	690	32.3319	0	18.8593	77.8329
1307	chr12	132000000	132500000	1308	0.635745	531	0	18	0	52.5023	0	2.57173	0
1045	chr12	1000000	1500000	1046	0.604432	457	445	219	1	45.1856	46.7102	31.2894	0.112801
1046	chr12	1500000	2000000	1047	0.603408	2	625	73	730	0.197749	65.6043	10.4298	82.345
1043	chr12	0	500000	1044	0.578611	246	6	58	3	24.3231	0.629801	8.28668	0.338404
1270	chr12	113500000	114000000	1271	0.575604	0	1	4	389	0	0.104967	0.571495	43.8797
1052	chr12	4500000	5000000	1053	0.53624	3	134	181	6	0.296623	14.0656	25.8602	0.676808
1068	chr12	12500000	13000000	1069	0.505327	1	105	267	2	0.0988743	11.0215	38.1473	0.225603
1140	chr12	48500000	49000000	1141	0.493106	14	1	195	5	1.38424	0.104967	27.8604	0.564007
1048	chr12	2500000	3000000	1049	0.487954	45	14	104	0	4.44935	1.46954	14.8589	0
1276	chr12	116500000	117000000	1277	0.48509	1	1	111	94	0.0988743	0.104967	15.859	10.6033
1067	chr12	12000000	12500000	1068	0.480711	613	35	430	895	60.61	3.67384	61.4357	100.957
1061	chr12	9000000	9500000	1062	0.480429	1165	28	6	858	115.189	2.93907	0.857243	96.7835
1063	chr12	10000000	10500000	1064	0.475177	4	42	76	27	0.395497	4.40861	10.8584	3.04564
1277	chr12	117000000	117500000	1278	0.472756	0	0	6	56	0	0	0.857243	6.31687
1051	chr12	4000000	4500000	1052	0.465096	603	6	559	74	59.6212	0.629801	79.8664	8.3473
1279	chr12	118000000	118500000	1280	0.457818	211	1	2	86	20.8625	0.104967	0.285748	9.70091
1058	chr12	7500000	8000000	1059	0.448322	190	9	252	400	18.7861	0.944701	36.0042	45.1205
1107	chr12	32000000	32500000	1108	0.447687	710	1073	86	1611	70.2008	112.629	12.2871	181.723
1060	chr12	8500000	9000000	1061	0.438243	291	2023	72	150	28.7724	212.348	10.2869	16.9202
1235	chr12	96000000	96500000	1236	0.424944	52	654	33	3	5.14147	68.6483	4.71483	0.338404
1260	chr12	108500000	109000000	1261	0.424815	422	0	77	0	41.725	0	11.0013	0
1280	chr12	118500000	119000000	1281	0.422634	0	33	147	1	0	3.4639	21.0024	0.112801
1153	chr12	55000000	55500000	1154	0.420462	22	337	21	10	2.17524	35.3738	3.00035	1.12801
1093	chr12	25000000	25500000	1094	0.410009	52	2492	373	6	5.14147	261.577	53.2919	0.676808
1050	chr12	3500000	4000000	1051	0.409718	435	4	17	3	43.0103	0.419867	2.42885	0.338404
1259	chr12	108000000	108500000	1260	0.407628	1430	14	13	269	141.39	1.46954	1.85736	30.3436
1047	chr12	2000000	2500000	1048	0.404199	2	1545	49	3	0.197749	162.174	7.00081	0.338404
1049	chr12	3000000	3500000	1050	0.397831	0	0	208	1	0	0	29.7177	0.112801
1236	chr12	96500000	97000000	1237	0.397394	62	616	117	7	6.13021	64.6596	16.7162	0.789609
1064	chr12	10500000	11000000	1065	0.386348	403	0	32	3	39.8464	0	4.57196	0.338404
1269	chr12	113000000	113500000	1270	0.379856	83	235	85	182	8.20657	24.6672	12.1443	20.5298
1233	chr12	95000000	95500000	1234	0.3728	6	198	156	1	0.593246	20.7834	22.2883	0.112801
1135	chr12	46000000	46500000	1136	0.356905	217	0	114	41	21.4557	0	16.2876	4.62485
1302	chr12	129500000	130000000	1303	0.351854	403	1	3	3	39.8464	0.104967	0.428621	0.338404
1066	chr12	11500000	12000000	1067	0.349636	130	2	223	5	12.8537	0.209934	31.8608	0.564007
1159	chr12	58000000	58500000	1160	0.3494	21	180	256	1	2.07636	18.894	36.5757	0.112801
1092	chr12	24500000	25000000	1093	0.325675	119	269	32	1712	11.766	28.2361	4.57196	193.116
1054	chr12	5500000	6000000	1055	0.324205	328	9	89	0	32.4308	0.944701	12.7158	0
1257	chr12	107000000	107500000	1258	0.321313	0	76	227	0	0	7.97748	32.4323	0
1136	chr12	46500000	47000000	1137	0.316202	91	15	54	4	8.99757	1.5745	7.71518	0.451205
1278	chr12	117500000	118000000	1279	0.310535	63	0	232	2	6.22908	0	33.1467	0.225603
1096	chr12	26500000	27000000	1097	0.307263	476	2492	255	1399	47.0642	261.577	36.4328	157.809
1232	chr12	94500000	95000000	1233	0.301434	237	95	8	3	23.4332	9.97185	1.14299	0.338404
1258	chr12	107500000	108000000	1259	0.298659	4	7	232	6	0.395497	0.734768	33.1467	0.676808
1181	chr12	69000000	69500000	1182	0.292944	1	3	48	8	0.0988743	0.3149	6.85794	0.902411
1098	chr12	27500000	28000000	1099	0.289182	560	375	137	1	55.3696	39.3626	19.5737	0.112801
1254	chr12	105500000	106000000	1255	0.252621	4	4	53	6	0.395497	0.419867	7.57231	0.676808
1305	chr12	131000000	131500000	1306	0.251557	646	833	121	1	63.8728	87.4374	17.2877	0.112801
1303	chr12	130000000	130500000	1304	0.247792	125	1	105	0	12.3593	0.104967	15.0017	0
1230	chr12	93500000	94000000	1231	0.242567	443	139	87	11	43.8013	14.5904	12.43	1.24081
1138	chr12	47500000	48000000	1139	0.220571	673	3	117	6	66.5424	0.3149	16.7162	0.676808
1106	chr12	31500000	32000000	1107	0.208255	117	9	164	21	11.5683	0.944701	23.4313	2.36883
1182	chr12	69500000	70000000	1183	0.206699	298	0	127	21	29.4646	0	18.145	2.36883
1256	chr12	106500000	107000000	1257	0.202905	25	4	113	1	2.47186	0.419867	16.1447	0.112801
1231	chr12	94000000	94500000	1232	0.202729	279	14	73	1	27.5859	1.46954	10.4298	0.112801
1053	chr12	5000000	5500000	1054	0.194525	530	18	306	1	52.4034	1.8894	43.7194	0.112801
1134	chr12	45500000	46000000	1135	0.186601	193	2	113	138	19.0827	0.209934	16.1447	15.5666
1154	chr12	55500000	56000000	1155	0.113691	183	19	53	12	18.094	1.99437	7.57231	1.35362
1252	chr12	104500000	105000000	1253	0.107567	5	2	431	78	0.494372	0.209934	61.5786	8.7985
1306	chr12	131500000	132000000	1307	0.076042	0	3	0	3	0	0.3149	0	0.338404
1105	chr12	31000000	31500000	1106	0.0622251	166	1	181	1082	16.4131	0.104967	25.8602	122.051
1172	chr12	64500000	65000000	1173	0.0525482	121	15	188	13	11.9638	1.5745	26.8603	1.46642
1304	chr12	130500000	131000000	1305	0.0476845	0	0	179	10	0	0	25.5744	1.12801
1194	chr12	75500000	76000000	1195	0.0437433	8	3	24	1	0.790995	0.3149	3.42897	0.112801
1069	chr12	13000000	13500000	1070	0.0352859	47	4	292	469	4.64709	0.419867	41.7191	52.9038
1094	chr12	25500000	26000000	1095	0.0326121	18	12	163	267	1.77974	1.2596	23.2884	30.118
1294	chr12	125500000	126000000	1295	0.0154925	563	1	203	2	55.6663	0.104967	29.0034	0.225603
1271	chr12	114000000	114500000	1272	0.0122066	2	0	0	0	0.197749	0	0	0
1229	chr12	93000000	93500000	1230	-0.0130736	479	14	147	9	47.3608	1.46954	21.0024	1.01521
1251	chr12	104000000	104500000	1252	-0.013865	3	6	1	2	0.296623	0.629801	0.142874	0.225603
1095	chr12	26000000	26500000	1096	-0.0232386	9	1950	31	1	0.889869	204.685	4.42909	0.112801
1196	chr12	76500000	77000000	1197	-0.035719	913	1	177	3	90.2723	0.104967	25.2887	0.338404
1065	chr12	11000000	11500000	1066	-0.0455237	60	620	28	5	5.93246	65.0794	4.00047	0.564007
1282	chr12	119500000	120000000	1283	-0.0525873	346	0	9	6	34.2105	0	1.28586	0.676808
1179	chr12	68000000	68500000	1180	-0.0764945	67	0	17	2	6.62458	0	2.42885	0.225603
1091	chr12	24000000	24500000	1092	-0.0803554	1238	387	523	12	122.406	40.6222	74.723	1.35362
1088	chr12	22500000	23000000	1089	-0.0980623	71	971	136	3	7.02008	101.923	19.4308	0.338404
1228	chr12	92500000	93000000	1229	-0.119809	519	120	110	60	51.3158	12.596	15.7161	6.76808
1281	chr12	119000000	119500000	1282	-0.123078	9	751	7	20	0.889869	78.8301	1.00012	2.25603
1168	chr12	62500000	63000000	1169	-0.125905	463	17	15	3	45.7788	1.78444	2.14311	0.338404
1223	chr12	90000000	90500000	1224	-0.136743	680	18	149	44	67.2346	1.8894	21.2882	4.96326
1222	chr12	89500000	90000000	1223	-0.139406	352	38	374	862	34.8038	3.98874	53.4348	97.2347
1169	chr12	63000000	63500000	1170	-0.139811	137	3	145	179	13.5458	0.3149	20.7167	20.1914
1247	chr12	102000000	102500000	1248	-0.154364	2	1	1	6	0.197749	0.104967	0.142874	0.676808
1173	chr12	65000000	65500000	1174	-0.157069	16	181	139	5	1.58199	18.999	19.8595	0.564007
1237	chr12	97000000	97500000	1238	-0.169748	141	1090	31	9	13.9413	114.414	4.42909	1.01521
1195	chr12	76000000	76500000	1196	-0.171594	19	18	6	7	1.87861	1.8894	0.857243	0.789609
1255	chr12	106000000	106500000	1256	-0.179179	6	2	73	4	0.593246	0.209934	10.4298	0.451205
1253	chr12	105000000	105500000	1254	-0.184935	10	11	18	3	0.988743	1.15463	2.57173	0.338404
1137	chr12	47000000	47500000	1138	-0.188542	15	7	200	8	1.48312	0.734768	28.5748	0.902411
1275	chr12	116000000	116500000	1276	-0.192166	279	2	69	155	27.5859	0.209934	9.85829	17.4842
1197	chr12	77000000	77500000	1198	-0.214315	1030	6	362	298	101.841	0.629801	51.7203	33.6148
1178	chr12	67500000	68000000	1179	-0.219479	148	8	4	0	14.6334	0.839734	0.571495	0
1082	chr12	19500000	20000000	1083	-0.21965	11	4	109	729	1.08762	0.419867	15.5732	82.2322
1108	chr12	32500000	33000000	1109	-0.242587	0	1	14	227	0	0.104967	2.00023	25.6059
1072	chr12	14500000	15000000	1073	-0.261804	1173	1415	153	2	115.98	148.528	21.8597	0.225603
1240	chr12	98500000	99000000	1241	-0.27088	50	676	120	1	4.94372	70.9576	17.1449	0.112801
1297	chr12	127000000	127500000	1298	-0.284786	99	58	289	63	9.78856	6.08807	41.2905	7.10648
1193	chr12	75000000	75500000	1194	-0.289215	56	400	8	152	5.53696	41.9867	1.14299	17.1458
1128	chr12	42500000	43000000	1129	-0.289327	170	2	6	37	16.8086	0.209934	0.857243	4.17365
1298	chr12	127500000	128000000	1299	-0.30221	257	3	65	14	25.4107	0.3149	9.28679	1.57922
1081	chr12	19000000	19500000	1082	-0.306919	908	219	246	1535	89.7779	22.9877	35.1469	173.15
1203	chr12	80000000	80500000	1204	-0.31669	49	12	302	1941	4.84484	1.2596	43.1479	218.947
1176	chr12	66500000	67000000	1177	-0.332068	366	902	116	285	36.188	94.6801	16.5734	32.1484
1187	chr12	72000000	72500000	1188	-0.339301	153	0	53	186	15.1278	0	7.57231	20.981
1073	chr12	15000000	15500000	1074	-0.372812	68	5	172	1954	6.72346	0.524834	24.5743	220.414
1086	chr12	21500000	22000000	1087	-0.374322	503	9	394	6	49.7338	0.944701	56.2923	0.676808
1227	chr12	92000000	92500000	1228	-0.384212	472	12	101	922	46.6687	1.2596	14.4302	104.003
1183	chr12	70000000	70500000	1184	-0.394281	32	17	292	37	3.16398	1.78444	41.7191	4.17365
1272	chr12	114500000	115000000	1273	-0.406107	565	1	223	0	55.864	0.104967	31.8608	0
1087	chr12	22000000	22500000	1088	-0.411151	16	6	56	48	1.58199	0.629801	8.00093	5.41446
1104	chr12	30500000	31000000	1105	-0.419602	15	2	18	5	1.48312	0.209934	2.57173	0.564007
1101	chr12	29000000	29500000	1102	-0.429615	249	268	154	1	24.6197	28.1311	22.0026	0.112801
1244	chr12	100500000	101000000	1245	-0.444773	32	3	17	981	3.16398	0.3149	2.42885	110.658
1099	chr12	28000000	28500000	1100	-0.446673	263	3	200	9	26.004	0.3149	28.5748	1.01521
1209	chr12	83000000	83500000	1210	-0.461761	213	63	69	66	21.0602	6.61291	9.85829	7.44489
1184	chr12	70500000	71000000	1185	-0.496456	760	13	191	41	75.1445	1.36457	27.2889	4.62485
1246	chr12	101500000	102000000	1247	-0.510379	3	6	38	8	0.296623	0.629801	5.4292	0.902411
1171	chr12	64000000	64500000	1172	-0.511528	35	2	54	229	3.4606	0.209934	7.71518	25.8315
1300	chr12	128500000	129000000	1301	-0.524667	176	72	2	10	17.4019	7.55761	0.285748	1.12801
1071	chr12	14000000	14500000	1072	-0.52523	1343	0	109	2672	132.788	0	15.5732	301.405
1202	chr12	79500000	80000000	1203	-0.534897	30	4	51	4	2.96623	0.419867	7.28656	0.451205
1090	chr12	23500000	24000000	1091	-0.535654	64	84	171	8	6.32796	8.81721	24.4314	0.902411
1273	chr12	115000000	115500000	1274	-0.538114	0	2	1	24	0	0.209934	0.142874	2.70723
1201	chr12	79000000	79500000	1202	-0.569698	786	1045	2	272	77.7152	109.69	0.285748	30.682
1111	chr12	34000000	34500000	1112	-0.586634	285	6	168	14	28.1792	0.629801	24.0028	1.57922
1185	chr12	71000000	71500000	1186	-0.586809	5	195	6	8	0.494372	20.4685	0.857243	0.902411
1089	chr12	23000000	23500000	1090	-0.598121	197	75	316	948	19.4782	7.87251	45.1481	106.936
1102	chr12	29500000	30000000	1103	-0.605604	923	452	15	1721	91.261	47.445	2.14311	194.131
1241	chr12	99000000	99500000	1242	-0.609308	307	2	38	54	30.3544	0.209934	5.4292	6.09127
1274	chr12	115500000	116000000	1275	-0.613777	70	2	3	0	6.9212	0.209934	0.428621	0
1174	chr12	65500000	66000000	1175	-0.614038	33	70	99	4	3.26285	7.34768	14.1445	0.451205
1075	chr12	16000000	16500000	1076	-0.614815	283	2	15	83	27.9814	0.209934	2.14311	9.36251
1161	chr12	59000000	59500000	1162	-0.626808	11	4	279	4	1.08762	0.419867	39.8618	0.451205
1221	chr12	89000000	89500000	1222	-0.632955	455	3	21	3	44.9878	0.3149	3.00035	0.338404
1100	chr12	28500000	29000000	1101	-0.637028	68	9	24	2649	6.72346	0.944701	3.42897	298.811
1295	chr12	126000000	126500000	1296	-0.637705	1	0	24	0	0.0988743	0	3.42897	0
1208	chr12	82500000	83000000	1209	-0.638764	787	3	238	0	77.8141	0.3149	34.004	0
1299	chr12	128000000	128500000	1300	-0.654371	4	185	122	2	0.395497	19.4189	17.4306	0.225603
1186	chr12	71500000	72000000	1187	-0.654491	106	7	2	110	10.4807	0.734768	0.285748	12.4081
1074	chr12	15500000	16000000	1075	-0.689649	33	760	14	45	3.26285	79.7748	2.00023	5.07606
1070	chr12	13500000	14000000	1071	-0.691517	425	10	3	1	42.0216	1.04967	0.428621	0.112801
1296	chr12	126500000	127000000	1297	-0.691704	28	14	2	6	2.76848	1.46954	0.285748	0.676808
1175	chr12	66000000	66500000	1176	-0.692402	169	4	4	45	16.7098	0.419867	0.571495	5.07606
1123	chr12	40000000	40500000	1124	-0.706549	50	40	48	6	4.94372	4.19867	6.85794	0.676808
1224	chr12	90500000	91000000	1225	-0.706926	1	524	89	1	0.0988743	55.0026	12.7158	0.112801
1163	chr12	60000000	60500000	1164	-0.723227	6	3	11	8	0.593246	0.3149	1.57161	0.902411
1160	chr12	58500000	59000000	1161	-0.726341	161	153	189	2	15.9188	16.0599	27.0031	0.225603
1079	chr12	18000000	18500000	1080	-0.726374	318	536	257	1	31.442	56.2622	36.7186	0.112801
1219	chr12	88000000	88500000	1220	-0.738764	127	13	4	10	12.557	1.36457	0.571495	1.12801
1220	chr12	88500000	89000000	1221	-0.745158	290	2	150	393	28.6736	0.209934	21.4311	44.3309
1210	chr12	83500000	84000000	1211	-0.758254	250	0	84	6	24.7186	0	12.0014	0.676808
1083	chr12	20000000	20500000	1084	-0.759474	1	130	16	0	0.0988743	13.6457	2.28598	0
1080	chr12	18500000	19000000	1081	-0.760198	50	25	104	11	4.94372	2.62417	14.8589	1.24081
1162	chr12	59500000	60000000	1163	-0.768899	424	3	224	5	41.9227	0.3149	32.0037	0.564007
1177	chr12	67000000	67500000	1178	-0.773001	108	1059	61	0	10.6784	111.16	8.7153	0
1238	chr12	97500000	98000000	1239	-0.780685	4	689	98	3	0.395497	72.3221	14.0016	0.338404
1192	chr12	74500000	75000000	1193	-0.781701	127	3	1	17	12.557	0.3149	0.142874	1.91762
1170	chr12	63500000	64000000	1171	-0.788612	8	23	3	3	0.790995	2.41424	0.428621	0.338404
1131	chr12	44000000	44500000	1132	-0.788683	14	0	201	3	1.38424	0	28.7176	0.338404
1188	chr12	72500000	73000000	1189	-0.792884	183	4	161	2	18.094	0.419867	23.0027	0.225603
1078	chr12	17500000	18000000	1079	-0.801755	22	314	31	1	2.17524	32.9596	4.42909	0.112801
1239	chr12	98000000	98500000	1240	-0.801828	51	7	225	12	5.04259	0.734768	32.1466	1.35362
1085	chr12	21000000	21500000	1086	-0.804765	203	166	130	301	20.0715	17.4245	18.5736	33.9532
1127	chr12	42000000	42500000	1128	-0.807872	263	21	249	24	26.004	2.2043	35.5756	2.70723
1218	chr12	87500000	88000000	1219	-0.808132	13	7	17	5	1.28537	0.734768	2.42885	0.564007
1200	chr12	78500000	79000000	1201	-0.810267	284	8	151	6	28.0803	0.839734	21.5739	0.676808
1248	chr12	102500000	103000000	1249	-0.813093	26	447	3	3	2.57073	46.9202	0.428621	0.338404
1122	chr12	39500000	40000000	1123	-0.814982	480	7	78	1	47.4597	0.734768	11.1442	0.112801
1103	chr12	30000000	30500000	1104	-0.819228	1030	220	84	194	101.841	23.0927	12.0014	21.8835
1084	chr12	20500000	21000000	1085	-0.823813	110	3	360	1	10.8762	0.3149	51.4346	0.112801
1213	chr12	85000000	85500000	1214	-0.82651	11	0	153	24	1.08762	0	21.8597	2.70723
1077	chr12	17000000	17500000	1078	-0.826821	443	3	6	2	43.8013	0.3149	0.857243	0.225603
1211	chr12	84000000	84500000	1212	-0.834451	26	16	150	4	2.57073	1.67947	21.4311	0.451205
1215	chr12	86000000	86500000	1216	-0.836184	334	12	125	335	33.024	1.2596	17.8592	37.7884
1204	chr12	80500000	81000000	1205	-0.837777	20	11	52	11	1.97749	1.15463	7.42944	1.24081
1109	chr12	33000000	33500000	1110	-0.850695	9	11	3	1	0.889869	1.15463	0.428621	0.112801
1214	chr12	85500000	86000000	1215	-0.852738	432	3	63	5	42.7137	0.3149	9.00105	0.564007
1076	chr12	16500000	17000000	1077	-0.856429	247	73	138	4	24.422	7.66258	19.7166	0.451205
1120	chr12	38500000	39000000	1121	-0.857383	9	0	1	3	0.889869	0	0.142874	0.338404
1226	chr12	91500000	92000000	1227	-0.872303	3	4	240	6	0.296623	0.419867	34.2897	0.676808
1167	chr12	62000000	62500000	1168	-0.88239	45	37	6	3	4.44935	3.88377	0.857243	0.338404
1216	chr12	86500000	87000000	1217	-0.888123	157	974	2	5	15.5233	102.238	0.285748	0.564007
1217	chr12	87000000	87500000	1218	-0.896834	21	6	69	41	2.07636	0.629801	9.85829	4.62485
1207	chr12	82000000	82500000	1208	-0.89739	352	19	12	1	34.8038	1.99437	1.71449	0.112801
1133	chr12	45000000	45500000	1134	-0.906592	10	521	263	1119	0.988743	54.6877	37.5758	126.225
1198	chr12	77500000	78000000	1199	-0.906991	276	910	89	5	27.2893	95.5198	12.7158	0.564007
1243	chr12	100000000	100500000	1244	-0.907776	180	160	451	113	17.7974	16.7947	64.4361	12.7465
1225	chr12	91000000	91500000	1226	-0.921741	626	0	28	718	61.8953	0	4.00047	80.9914
1189	chr12	73000000	73500000	1190	-0.951818	87	0	86	0	8.60207	0	12.2871	0
1191	chr12	74000000	74500000	1192	-0.955374	1	61	0	2	0.0988743	6.40298	0	0.225603
1166	chr12	61500000	62000000	1167	-0.962491	13	12	70	166	1.28537	1.2596	10.0012	18.725
1249	chr12	103000000	103500000	1250	-0.963802	6	836	67	5	0.593246	87.7523	9.57254	0.564007
1250	chr12	103500000	104000000	1251	-0.964212	11	12	6	14	1.08762	1.2596	0.857243	1.57922
1206	chr12	81500000	82000000	1207	-0.968762	12	66	33	1	1.18649	6.92781	4.71483	0.112801
1165	chr12	61000000	61500000	1166	-0.968892	9	3	117	17	0.889869	0.3149	16.7162	1.91762
1110	chr12	33500000	34000000	1111	-0.990851	24	0	151	4	2.37298	0	21.5739	0.451205
1164	chr12	60500000	61000000	1165	-0.99177	1	108	1	3	0.0988743	11.3364	0.142874	0.338404
1205	chr12	81000000	81500000	1206	-0.993639	125	3	29	3	12.3593	0.3149	4.14334	0.338404
1199	chr12	78000000	78500000	1200	-1.00432	3	5	94	163	0.296623	0.524834	13.4301	18.3866
1190	chr12	73500000	74000000	1191	-1.00527	20	5	3	4	1.97749	0.524834	0.428621	0.451205
1129	chr12	43000000	43500000	1130	-1.04627	172	7	50	3	17.0064	0.734768	7.14369	0.338404
1126	chr12	41500000	42000000	1127	-1.06223	4	1	59	1	0.395497	0.104967	8.42955	0.112801
1130	chr12	43500000	44000000	1131	-1.13314	21	15	12	14	2.07636	1.5745	1.71449	1.57922
1121	chr12	39000000	39500000	1122	-1.14187	28	18	60	17	2.76848	1.8894	8.57243	1.91762
1125	chr12	41000000	41500000	1126	-1.18682	116	20	86	4	11.4694	2.09934	12.2871	0.451205
1132	chr12	44500000	45000000	1133	-1.19426	18	775	13	9	1.77974	81.3493	1.85736	1.01521
1124	chr12	40500000	41000000	1125	-1.21014	32	139	38	2	3.16398	14.5904	5.4292	0.225603
1242	chr12	99500000	100000000	1243	-1.22859	76	1594	19	3	7.51445	167.317	2.7146	0.338404
1510	chr13	99500000	100000000	1511	0.863294	80	4	183	2	7.90995	0.419867	26.1459	0.225603
1394	chr13	41500000	42000000	1395	0.796964	457	386	800	0	45.1856	40.5172	114.299	0
1413	chr13	51000000	51500000	1414	0.785416	11	36	48	70	1.08762	3.77881	6.85794	7.89609
1395	chr13	42000000	42500000	1396	0.784344	13	10	170	306	1.28537	1.04967	24.2885	34.5172
1539	chr13	114000000	114500000	1540	0.777314	309	345	65	0	30.5522	36.2135	9.28679	0
1415	chr13	52000000	52500000	1416	0.765573	151	127	139	1	14.93	13.3308	19.8595	0.112801
1372	chr13	30500000	31000000	1373	0.754737	160	5	403	1	15.8199	0.524834	57.5781	0.112801
1396	chr13	42500000	43000000	1397	0.741727	87	1	1	619	8.60207	0.104967	0.142874	69.824
1404	chr13	46500000	47000000	1405	0.739903	643	125	344	725	63.5762	13.1209	49.1486	81.781
1412	chr13	50500000	51000000	1413	0.73967	138	1	71	210	13.6447	0.104967	10.144	23.6883
1540	chr13	114500000	115000000	1541	0.73636	374	0	0	1	36.979	0	0	0.112801
1373	chr13	31000000	31500000	1374	0.73151	1256	144	502	1	124.186	15.1152	71.7226	0.112801
1363	chr13	26000000	26500000	1364	0.721233	692	817	319	527	68.421	85.7579	45.5767	59.4463
1411	chr13	50000000	50500000	1412	0.718166	5	83	109	679	0.494372	8.71225	15.5732	76.5921
1416	chr13	52500000	53000000	1417	0.700324	72	634	235	63	7.11895	66.549	33.5753	7.10648
1414	chr13	51500000	52000000	1415	0.698753	411	44	192	3	40.6374	4.61854	27.4318	0.338404
1402	chr13	45500000	46000000	1403	0.697864	3	198	207	1220	0.296623	20.7834	29.5749	137.618
1538	chr13	113500000	114000000	1539	0.695164	4	0	28	0	0.395497	0	4.00047	0
1354	chr13	21500000	22000000	1355	0.681193	77	2	147	52	7.61332	0.209934	21.0024	5.86567
1367	chr13	28000000	28500000	1368	0.679783	111	1146	0	2	10.9751	120.292	0	0.225603
1366	chr13	27500000	28000000	1367	0.669358	4	15	523	637	0.395497	1.5745	74.723	71.8544
1364	chr13	26500000	27000000	1365	0.668422	17	2	145	1	1.68086	0.209934	20.7167	0.112801
1512	chr13	100500000	101000000	1513	0.665278	636	9	189	1	62.8841	0.944701	27.0031	0.112801
1400	chr13	44500000	45000000	1401	0.66166	9	1	79	1	0.889869	0.104967	11.287	0.112801
1368	chr13	28500000	29000000	1369	0.659114	211	6	443	738	20.8625	0.629801	63.2931	83.2474
1353	chr13	21000000	21500000	1354	0.645695	530	0	203	353	52.4034	0	29.0034	39.8189
1534	chr13	111500000	112000000	1535	0.639714	0	10	2	6	0	1.04967	0.285748	0.676808
1509	chr13	99000000	99500000	1510	0.644854	1	1	97	2277	0.0988743	0.104967	13.8588	256.849
1360	chr13	24500000	25000000	1361	0.628911	501	316	44	0	49.536	33.1695	6.28645	0
1533	chr13	111000000	111500000	1534	0.5329	0	1	26	556	0	0.104967	3.71472	62.7175
1375	chr13	32000000	32500000	1376	-0.107714	5	0	92	1459	0.494372	0	13.1444	164.577
1408	chr13	48500000	49000000	1409	0.609067	125	588	124	3	12.3593	61.7205	17.7163	0.338404
1403	chr13	46000000	46500000	1404	0.586	527	31	404	4	52.1068	3.25397	57.721	0.451205
1511	chr13	100000000	100500000	1512	0.581956	452	23	232	0	44.6912	2.41424	33.1467	0
1410	chr13	49500000	50000000	1411	0.580039	6	35	45	96	0.593246	3.67384	6.42932	10.8289
1466	chr13	77500000	78000000	1467	0.568688	4	43	255	4	0.395497	4.51357	36.4328	0.451205
1377	chr13	33000000	33500000	1378	0.543361	9	300	11	7	0.889869	31.49	1.57161	0.789609
1352	chr13	20500000	21000000	1353	0.53128	34	6	421	378	3.36173	0.629801	60.1499	42.6389
1369	chr13	29000000	29500000	1370	0.527599	11	2	257	212	1.08762	0.209934	36.7186	23.9139
1362	chr13	25500000	26000000	1363	0.497832	423	939	170	3	41.8238	98.5638	24.2885	0.338404
1365	chr13	27000000	27500000	1366	0.475348	285	1896	204	1	28.1792	199.017	29.1462	0.112801
1409	chr13	49000000	49500000	1410	0.472253	761	0	53	22	75.2434	0	7.57231	2.48163
1432	chr13	60500000	61000000	1433	0.466184	234	164	483	1876	23.1366	17.2146	69.008	211.615
1401	chr13	45000000	45500000	1402	0.43875	45	1	87	1	4.44935	0.104967	12.43	0.112801
1371	chr13	30000000	30500000	1372	0.437548	469	881	54	6	46.3721	92.4758	7.71518	0.676808
1361	chr13	25000000	25500000	1362	0.433968	98	8	46	33	9.68969	0.839734	6.57219	3.72244
1393	chr13	41000000	41500000	1394	0.418018	14	13	20	78	1.38424	1.36457	2.85748	8.7985
1537	chr13	113000000	113500000	1538	0.408518	3	174	84	68	0.296623	18.2642	12.0014	7.67049
1405	chr13	47000000	47500000	1406	0.389349	44	1237	120	274	4.35047	129.844	17.1449	30.9076
1460	chr13	74500000	75000000	1461	0.352978	9	104	78	3	0.889869	10.9165	11.1442	0.338404
1374	chr13	31500000	32000000	1375	0.342633	237	513	461	3	23.4332	53.848	65.8648	0.338404
1376	chr13	32500000	33000000	1377	0.303258	2	2	169	26	0.197749	0.209934	24.1457	2.93283
1392	chr13	40500000	41000000	1393	0.290958	19	1394	203	1677	1.87861	146.324	29.0034	189.168
1463	chr13	76000000	76500000	1464	0.287094	454	2	223	4	44.889	0.209934	31.8608	0.451205
1513	chr13	101000000	101500000	1514	0.264703	9	2	312	218	0.889869	0.209934	44.5766	24.5907
1351	chr13	20000000	20500000	1352	0.248744	22	10	180	1	2.17524	1.04967	25.7173	0.112801
1501	chr13	95000000	95500000	1502	0.216254	442	14	217	152	43.7025	1.46954	31.0036	17.1458
1446	chr13	67500000	68000000	1447	0.209684	122	127	632	2	12.0627	13.3308	90.2962	0.225603
1397	chr13	43000000	43500000	1398	0.207922	75	1	14	1360	7.41558	0.104967	2.00023	153.41
1417	chr13	53000000	53500000	1418	0.206151	244	1	671	540	24.1253	0.104967	95.8683	60.9127
1508	chr13	98500000	99000000	1509	0.198322	534	28	114	45	52.7989	2.93907	16.2876	5.07606
1359	chr13	24000000	24500000	1360	0.176067	7	356	35	497	0.69212	37.3682	5.00058	56.0623
1398	chr13	43500000	44000000	1399	0.171769	72	183	336	181	7.11895	19.2089	48.0056	20.417
1517	chr13	103000000	103500000	1518	0.16682	541	3	464	2	53.491	0.3149	66.2934	0.225603
1535	chr13	112000000	112500000	1536	0.145976	6	328	34	191	0.593246	34.4291	4.85771	21.5451
1399	chr13	44000000	44500000	1400	0.133981	286	8	3	0	28.2781	0.839734	0.428621	0
1431	chr13	60000000	60500000	1432	0.133277	212	20	74	31	20.9614	2.09934	10.5727	3.49684
1355	chr13	22000000	22500000	1356	0.108179	3	2	2	0	0.296623	0.209934	0.285748	0
1502	chr13	95500000	96000000	1503	0.0844569	396	887	123	105	39.1542	93.1056	17.5735	11.8441
1506	chr13	97500000	98000000	1507	0.0255511	511	181	10	5	50.5248	18.999	1.42874	0.564007
1503	chr13	96000000	96500000	1504	0.0170285	12	2	2	115	1.18649	0.209934	0.285748	12.9722
1470	chr13	79500000	80000000	1471	-0.00544568	326	6	224	45	32.233	0.629801	32.0037	5.07606
1471	chr13	80000000	80500000	1472	-0.0246844	13	1547	82	33	1.28537	162.384	11.7156	3.72244
1522	chr13	105500000	106000000	1523	-0.0479309	24	45	148	1239	2.37298	4.72351	21.1453	139.761
1379	chr13	34000000	34500000	1380	-0.0481691	117	1061	210	1	11.5683	111.37	30.0035	0.112801
1370	chr13	29500000	30000000	1371	-0.0727599	307	750	134	4	30.3544	78.7251	19.1451	0.451205
1472	chr13	80500000	81000000	1473	-0.074899	31	7	12	2	3.0651	0.734768	1.71449	0.225603
1462	chr13	75500000	76000000	1463	-0.0837916	8	4	216	4	0.790995	0.419867	30.8607	0.451205
1467	chr13	78000000	78500000	1468	-0.0902754	595	515	220	10	58.8302	54.0579	31.4322	1.12801
1457	chr13	73000000	73500000	1458	-0.0947616	7	1353	104	6	0.69212	142.02	14.8589	0.676808
1507	chr13	98000000	98500000	1508	-0.117769	425	4	62	421	42.0216	0.419867	8.85817	47.4894
1473	chr13	81000000	81500000	1474	-0.119752	4	592	118	8	0.395497	62.1404	16.8591	0.902411
1465	chr13	77000000	77500000	1466	-0.120126	260	3	50	41	25.7073	0.3149	7.14369	4.62485
1407	chr13	48000000	48500000	1408	-0.128669	34	140	97	6	3.36173	14.6954	13.8588	0.676808
1536	chr13	112500000	113000000	1537	-0.165132	0	148	80	1	0	15.5351	11.4299	0.112801
1459	chr13	74000000	74500000	1460	-0.175142	12	63	67	0	1.18649	6.61291	9.57254	0
1458	chr13	73500000	74000000	1459	-0.197239	2	1	314	1	0.197749	0.104967	44.8624	0.112801
1382	chr13	35500000	36000000	1383	-0.212807	1	0	81	10	0.0988743	0	11.5728	1.12801
1378	chr13	33500000	34000000	1379	-0.254782	7	67	64	407	0.69212	7.03278	9.14392	45.9101
1532	chr13	110500000	111000000	1533	-0.258832	67	564	64	1	6.62458	59.2013	9.14392	0.112801
1391	chr13	40000000	40500000	1392	-0.268428	4	0	0	2	0.395497	0	0	0.225603
1485	chr13	87000000	87500000	1486	-0.279868	872	0	42	101	86.2184	0	6.0007	11.3929
1474	chr13	81500000	82000000	1475	-0.316774	13	5	42	467	1.28537	0.524834	6.0007	52.6782
1385	chr13	37000000	37500000	1386	-0.325747	41	4	1	2	4.05385	0.419867	0.142874	0.225603
1445	chr13	67000000	67500000	1446	-0.342418	138	10	139	68	13.6447	1.04967	19.8595	7.67049
1469	chr13	79000000	79500000	1470	-0.347355	104	0	112	5	10.2829	0	16.0019	0.564007
1438	chr13	63500000	64000000	1439	-0.362026	489	46	42	0	48.3496	4.82847	6.0007	0
1383	chr13	36000000	36500000	1384	-0.389613	162	9	47	100	16.0176	0.944701	6.71507	11.2801
1357	chr13	23000000	23500000	1358	-0.39868	58	0	46	1	5.73471	0	6.57219	0.112801
1483	chr13	86000000	86500000	1484	-0.418273	641	139	205	3	63.3785	14.5904	29.2891	0.338404
1430	chr13	59500000	60000000	1431	-0.434573	74	120	186	2	7.3167	12.596	26.5745	0.225603
1350	chr13	19500000	20000000	1351	-0.436278	15	1567	25	506	1.48312	164.483	3.57184	57.0775
1358	chr13	23500000	24000000	1359	-0.439688	208	79	15	1	20.5659	8.29238	2.14311	0.112801
1386	chr13	37500000	38000000	1387	-0.444735	15	54	8	3	1.48312	5.66821	1.14299	0.338404
1521	chr13	105000000	105500000	1522	-0.449401	1	857	79	5	0.0988743	89.9566	11.287	0.564007
1433	chr13	61000000	61500000	1434	-0.458888	15	189	201	1	1.48312	19.8387	28.7176	0.112801
1443	chr13	66000000	66500000	1444	-0.481452	11	2	9	3	1.08762	0.209934	1.28586	0.338404
1480	chr13	84500000	85000000	1481	-0.486933	163	6	144	4	16.1165	0.629801	20.5738	0.451205
1444	chr13	66500000	67000000	1445	-0.488183	14	3	25	4	1.38424	0.3149	3.57184	0.451205
1518	chr13	103500000	104000000	1519	-0.491469	4	0	249	54	0.395497	0	35.5756	6.09127
1486	chr13	87500000	88000000	1487	-0.498673	285	0	150	1520	28.1792	0	21.4311	171.458
1525	chr13	107000000	107500000	1526	-0.504971	54	2	62	8	5.33921	0.209934	8.85817	0.902411
1390	chr13	39500000	40000000	1391	-0.521728	864	5	100	3	85.4274	0.524834	14.2874	0.338404
1468	chr13	78500000	79000000	1469	-0.526183	379	6	309	842	37.4734	0.629801	44.148	94.9787
1406	chr13	47500000	48000000	1407	-0.527363	8	3	45	30	0.790995	0.3149	6.42932	3.38404
1356	chr13	22500000	23000000	1357	-0.527389	61	1369	69	1017	6.03134	143.7	9.85829	114.719
1447	chr13	68000000	68500000	1448	-0.54454	86	5	9	5	8.50319	0.524834	1.28586	0.564007
1500	chr13	94500000	95000000	1501	-0.553327	182	0	245	198	17.9951	0	35.0041	22.3347
1442	chr13	65500000	66000000	1443	-0.568224	53	6	53	1	5.24034	0.629801	7.57231	0.112801
1461	chr13	75000000	75500000	1462	-0.585002	41	126	107	6	4.05385	13.2258	15.2875	0.676808
1475	chr13	82000000	82500000	1476	-0.587674	14	0	159	0	1.38424	0	22.7169	0
1439	chr13	64000000	64500000	1440	-0.595323	217	0	115	0	21.4557	0	16.4305	0
1487	chr13	88000000	88500000	1488	-0.598488	263	91	4	2	26.004	9.55198	0.571495	0.225603
1528	chr13	108500000	109000000	1529	-0.602805	9	329	5	755	0.889869	34.5341	0.714369	85.165
1441	chr13	65000000	65500000	1442	-0.604225	214	0	1	1	21.1591	0	0.142874	0.112801
1531	chr13	110000000	110500000	1532	-0.605632	703	995	47	358	69.5087	104.442	6.71507	40.3829
1384	chr13	36500000	37000000	1385	-0.607529	386	6	89	3	38.1655	0.629801	12.7158	0.338404
1523	chr13	106000000	106500000	1524	-0.608079	4	147	144	2	0.395497	15.4301	20.5738	0.225603
1514	chr13	101500000	102000000	1515	-0.611623	17	109	118	4	1.68086	11.4414	16.8591	0.451205
1524	chr13	106500000	107000000	1525	-0.611797	49	2	215	640	4.84484	0.209934	30.7179	72.1928
1490	chr13	89500000	90000000	1491	-0.611873	14	8	209	881	1.38424	0.839734	29.8606	99.378
1418	chr13	53500000	54000000	1419	-0.619972	97	109	104	2	9.59081	11.4414	14.8589	0.225603
1381	chr13	35000000	35500000	1382	-0.622861	16	490	4	4	1.58199	51.4337	0.571495	0.451205
1380	chr13	34500000	35000000	1381	-0.62655	16	2	456	246	1.58199	0.209934	65.1504	27.7491
1437	chr13	63000000	63500000	1438	-0.628869	3	835	77	174	0.296623	87.6473	11.0013	19.6274
1495	chr13	92000000	92500000	1496	-0.6395	43	3	131	1	4.2516	0.3149	18.7165	0.112801
1481	chr13	85000000	85500000	1482	-0.639823	46	28	18	3	4.54822	2.93907	2.57173	0.338404
1440	chr13	64500000	65000000	1441	-0.640442	546	631	1	60	53.9854	66.2341	0.142874	6.76808
1491	chr13	90000000	90500000	1492	-0.642525	500	2	3	3	49.4372	0.209934	0.428621	0.338404
1488	chr13	88500000	89000000	1489	-0.643887	194	103	218	2	19.1816	10.8116	31.1465	0.225603
1530	chr13	109500000	110000000	1531	-0.645341	60	173	0	425	5.93246	18.1593	0	47.9406
1482	chr13	85500000	86000000	1483	-0.648311	63	123	93	171	6.22908	12.9109	13.2873	19.289
1489	chr13	89000000	89500000	1490	-0.650623	7	1	3	4	0.69212	0.104967	0.428621	0.451205
1494	chr13	91500000	92000000	1495	-0.653361	68	670	3	2	6.72346	70.3278	0.428621	0.225603
1479	chr13	84000000	84500000	1480	-0.661522	546	2	55	1	53.9854	0.209934	7.85806	0.112801
1476	chr13	82500000	83000000	1477	-0.686086	272	54	101	4	26.8938	5.66821	14.4302	0.451205
1451	chr13	70000000	70500000	1452	-0.70777	590	5	2	10	58.3359	0.524834	0.285748	1.12801
1455	chr13	72000000	72500000	1456	-0.708696	58	1	39	1	5.73471	0.104967	5.57208	0.112801
1450	chr13	69500000	70000000	1451	-0.710276	66	1	88	36	6.52571	0.104967	12.5729	4.06085
1477	chr13	83000000	83500000	1478	-0.719875	69	190	225	17	6.82233	19.9437	32.1466	1.91762
1478	chr13	83500000	84000000	1479	-0.724588	14	9	113	1	1.38424	0.944701	16.1447	0.112801
1449	chr13	69000000	69500000	1450	-0.727838	2	1	55	0	0.197749	0.104967	7.85806	0
1492	chr13	90500000	91000000	1493	-0.73299	17	257	460	97	1.68086	26.9765	65.7219	10.9417
1436	chr13	62500000	63000000	1437	-0.736965	229	0	6	4	22.6422	0	0.857243	0.451205
1448	chr13	68500000	69000000	1449	-0.740443	90	576	43	2	8.89869	60.4609	6.14357	0.225603
1464	chr13	76500000	77000000	1465	-0.742823	188	0	29	1	18.5884	0	4.14334	0.112801
1456	chr13	72500000	73000000	1457	-0.750285	1	1461	175	7	0.0988743	153.357	25.0029	0.789609
1427	chr13	58000000	58500000	1428	-0.751776	195	280	121	16	19.2805	29.3907	17.2877	1.80482
1453	chr13	71000000	71500000	1454	-0.754762	249	0	6	0	24.6197	0	0.857243	0
1516	chr13	102500000	103000000	1517	-0.757074	1274	0	31	168	125.966	0	4.42909	18.9506
1454	chr13	71500000	72000000	1455	-0.770307	7	6	5	1	0.69212	0.629801	0.714369	0.112801
1493	chr13	91000000	91500000	1494	-0.784487	43	28	2	1	4.2516	2.93907	0.285748	0.112801
1429	chr13	59000000	59500000	1430	-0.784629	20	5	228	8	1.97749	0.524834	32.5752	0.902411
1428	chr13	58500000	59000000	1429	-0.786749	453	0	141	5	44.7901	0	20.1452	0.564007
1452	chr13	70500000	71000000	1453	-0.788304	746	9	68	3	73.7603	0.944701	9.71542	0.338404
1526	chr13	107500000	108000000	1527	-0.791558	519	9	1	342	51.3158	0.944701	0.142874	38.5781
1422	chr13	55500000	56000000	1423	-0.807011	10	0	0	0	0.988743	0	0	0
1424	chr13	56500000	57000000	1425	-0.812226	21	0	164	0	2.07636	0	23.4313	0
1504	chr13	96500000	97000000	1505	-0.814387	163	20	97	984	16.1165	2.09934	13.8588	110.997
1389	chr13	39000000	39500000	1390	-0.828335	483	0	26	332	47.7563	0	3.71472	37.45
1426	chr13	57500000	58000000	1427	-0.831684	96	7	110	9	9.49194	0.734768	15.7161	1.01521
1529	chr13	109000000	109500000	1530	-0.832026	547	20	113	384	54.0843	2.09934	16.1447	43.3157
1498	chr13	93500000	94000000	1499	-0.840525	27	152	3	17	2.66961	15.955	0.428621	1.91762
1425	chr13	57000000	57500000	1426	-0.84121	6	1	16	7	0.593246	0.104967	2.28598	0.789609
1519	chr13	104000000	104500000	1520	-0.861944	14	1	42	0	1.38424	0.104967	6.0007	0
1520	chr13	104500000	105000000	1521	-0.866171	7	2	5	2	0.69212	0.209934	0.714369	0.225603
1421	chr13	55000000	55500000	1422	-0.868883	45	0	157	2	4.44935	0	22.4312	0.225603
1423	chr13	56000000	56500000	1424	-0.870982	2	3	0	0	0.197749	0.3149	0	0
1434	chr13	61500000	62000000	1435	-0.885269	105	10	4	80	10.3818	1.04967	0.571495	9.02411
1420	chr13	54500000	55000000	1421	-0.892516	7	83	9	361	0.69212	8.71225	1.28586	40.7213
1388	chr13	38500000	39000000	1389	-0.898747	77	61	195	0	7.61332	6.40298	27.8604	0
1499	chr13	94000000	94500000	1500	-0.900121	747	2	19	48	73.8591	0.209934	2.7146	5.41446
1419	chr13	54000000	54500000	1420	-0.924492	279	601	40	9	27.5859	63.0851	5.71495	1.01521
1515	chr13	102000000	102500000	1516	-0.925114	126	10	76	3	12.4582	1.04967	10.8584	0.338404
1497	chr13	93000000	93500000	1498	-0.925896	886	4	28	2	87.6027	0.419867	4.00047	0.225603
1496	chr13	92500000	93000000	1497	-0.929247	75	5	22	1	7.41558	0.524834	3.14322	0.112801
1387	chr13	38000000	38500000	1388	-0.93574	0	0	23	0	0	0	3.2861	0
1435	chr13	62000000	62500000	1436	-0.937232	83	0	15	114	8.20657	0	2.14311	12.8594
1527	chr13	108000000	108500000	1528	-0.960268	6	40	60	0	0.593246	4.19867	8.57243	0
1505	chr13	97000000	97500000	1506	-0.967226	764	425	322	3	75.54	44.6109	46.0053	0.338404
1588	chr14	23000000	23500000	1589	0.651605	4	53	26	2	0.395497	5.56324	3.71472	0.225603
1725	chr14	91500000	92000000	1726	0.645798	554	1	0	0	54.7764	0.104967	0	0
1690	chr14	74000000	74500000	1691	0.625795	18	27	191	1	1.77974	2.8341	27.2889	0.112801
1591	chr14	24500000	25000000	1592	0.625126	5	12	363	3	0.494372	1.2596	51.8632	0.338404
1741	chr14	99500000	100000000	1742	0.550336	5	0	163	596	0.494372	0	23.2884	67.2296
1692	chr14	75000000	75500000	1693	0.611058	1	1201	7	1	0.0988743	126.065	1.00012	0.112801
1755	chr14	106500000	107000000	1756	0.540233	1	2	38	879	0.0988743	0.209934	5.4292	99.1524
1693	chr14	75500000	76000000	1694	0.601737	245	0	91	0	24.2242	0	13.0015	0
1688	chr14	73000000	73500000	1689	0.594085	30	1	12	2	2.96623	0.104967	1.71449	0.225603
1743	chr14	100500000	101000000	1744	0.592489	296	192	27	241	29.2668	20.1536	3.85759	27.1851
1689	chr14	73500000	74000000	1690	0.591409	0	221	277	0	0	23.1977	39.576	0
1585	chr14	21500000	22000000	1586	0.588937	57	223	38	0	5.63584	23.4076	5.4292	0
1728	chr14	93000000	93500000	1729	0.5846	30	235	155	96	2.96623	24.6672	22.1454	10.8289
1612	chr14	35000000	35500000	1613	0.581565	349	148	128	0	34.5071	15.5351	18.2878	0
1739	chr14	98500000	99000000	1740	0.580951	246	57	106	1099	24.3231	5.98311	15.1446	123.969
1672	chr14	65000000	65500000	1673	0.416613	1	0	248	2178	0.0988743	0	35.4327	245.681
1747	chr14	102500000	103000000	1748	0.571434	1	70	368	5	0.0988743	7.34768	52.5775	0.564007
1691	chr14	74500000	75000000	1692	0.56099	0	0	250	29	0	0	35.7184	3.27124
1748	chr14	103000000	103500000	1749	0.551769	12	2	72	0	1.18649	0.209934	10.2869	0
1750	chr14	104000000	104500000	1751	0.549841	188	118	90	1	18.5884	12.3861	12.8586	0.112801
1727	chr14	92500000	93000000	1728	0.547379	2	3	229	53	0.197749	0.3149	32.7181	5.97847
1589	chr14	23500000	24000000	1590	0.546054	0	92	255	54	0	9.65695	36.4328	6.09127
1684	chr14	71000000	71500000	1685	0.5396	85	8	80	8	8.40432	0.839734	11.4299	0.902411
1740	chr14	99000000	99500000	1741	0.539263	750	0	295	4	74.1558	0	42.1478	0.451205
1756	chr14	107000000	107349540	1757	0.536128	12	1	1	0	1.18649	0.104967	0.142874	0
1613	chr14	35500000	36000000	1614	0.53536	1081	192	556	0	106.883	20.1536	79.4378	0
1738	chr14	98000000	98500000	1739	0.533505	8	889	278	827	0.790995	93.3155	39.7189	93.2867
1742	chr14	100000000	100500000	1743	0.525802	50	2	21	6	4.94372	0.209934	3.00035	0.676808
1753	chr14	105500000	106000000	1754	0.520545	1	5	2	1	0.0988743	0.524834	0.285748	0.112801
1746	chr14	102000000	102500000	1747	0.518786	569	435	273	0	56.2595	45.6606	39.0045	0
1749	chr14	103500000	104000000	1750	0.51383	3	722	1	0	0.296623	75.786	0.142874	0
1726	chr14	92000000	92500000	1727	0.513089	14	3	140	2	1.38424	0.3149	20.0023	0.225603
1694	chr14	76000000	76500000	1695	0.506566	2	0	96	1	0.197749	0	13.7159	0.112801
1736	chr14	97000000	97500000	1737	0.50123	800	0	14	1	79.0995	0	2.00023	0.112801
1752	chr14	105000000	105500000	1753	0.496058	26	5	199	650	2.57073	0.524834	28.4319	73.3209
1685	chr14	71500000	72000000	1686	0.491778	634	305	70	3	62.6863	32.0149	10.0012	0.338404
1733	chr14	95500000	96000000	1734	0.486945	617	328	8	3	61.0055	34.4291	1.14299	0.338404
1697	chr14	77500000	78000000	1698	0.482277	9	2	16	11	0.889869	0.209934	2.28598	1.24081
1653	chr14	55500000	56000000	1654	0.47831	204	131	19	1310	20.1704	13.7507	2.7146	147.77
1673	chr14	65500000	66000000	1674	0.463685	589	83	335	881	58.237	8.71225	47.8627	99.378
1696	chr14	77000000	77500000	1697	0.459387	7	4	315	9	0.69212	0.419867	45.0052	1.01521
1681	chr14	69500000	70000000	1682	0.447884	48	0	54	232	4.74597	0	7.71518	26.1699
1648	chr14	53000000	53500000	1649	0.447683	226	2475	53	1974	22.3456	259.793	7.57231	222.67
1754	chr14	106000000	106500000	1755	0.445897	6	2	152	2	0.593246	0.209934	21.7168	0.225603
1682	chr14	70000000	70500000	1683	0.441897	1	1	145	1	0.0988743	0.104967	20.7167	0.112801
1643	chr14	50500000	51000000	1644	0.439682	6	1	162	405	0.593246	0.104967	23.1455	45.6845
1737	chr14	97500000	98000000	1738	0.426406	624	0	228	151	61.6976	0	32.5752	17.033
1671	chr14	64500000	65000000	1672	0.418074	904	15	119	45	89.3824	1.5745	17.002	5.07606
1678	chr14	68000000	68500000	1679	0.413289	4	125	287	1219	0.395497	13.1209	41.0048	137.505
1724	chr14	91000000	91500000	1725	0.410039	77	0	1	24	7.61332	0	0.142874	2.70723
1751	chr14	104500000	105000000	1752	0.408819	4	4	58	0	0.395497	0.419867	8.28668	0
1674	chr14	66000000	66500000	1675	0.405298	618	50	145	2	61.1043	5.24834	20.7167	0.225603
1647	chr14	52500000	53000000	1648	0.400758	11	9	5	745	1.08762	0.944701	0.714369	84.037
1687	chr14	72500000	73000000	1688	0.397099	398	0	63	1469	39.352	0	9.00105	165.705
1683	chr14	70500000	71000000	1684	0.38882	14	3	120	12	1.38424	0.3149	17.1449	1.35362
1686	chr14	72000000	72500000	1687	0.388781	313	6	52	3	30.9477	0.629801	7.42944	0.338404
1642	chr14	50000000	50500000	1643	0.378509	0	72	168	0	0	7.55761	24.0028	0
1735	chr14	96500000	97000000	1736	0.366557	4	40	7	2	0.395497	4.19867	1.00012	0.225603
1680	chr14	69000000	69500000	1681	0.361339	371	0	16	0	36.6824	0	2.28598	0
1652	chr14	55000000	55500000	1653	0.343633	225	0	372	66	22.2467	0	53.149	7.44489
1644	chr14	51000000	51500000	1645	0.342409	670	1	300	35	66.2458	0.104967	42.8621	3.94805
1677	chr14	67500000	68000000	1678	0.340587	78	0	170	60	7.7122	0	24.2885	6.76808
1670	chr14	64000000	64500000	1671	0.338382	20	0	1	252	1.97749	0	0.142874	28.4259
1744	chr14	101000000	101500000	1745	0.328715	1	878	149	0	0.0988743	92.1609	21.2882	0
1614	chr14	36000000	36500000	1615	0.313406	454	62	278	587	44.889	6.50794	39.7189	66.2144
1745	chr14	101500000	102000000	1746	0.30997	6	1	7	2	0.593246	0.104967	1.00012	0.225603
1586	chr14	22000000	22500000	1587	0.301487	451	2	330	599	44.5923	0.209934	47.1483	67.568
1605	chr14	31500000	32000000	1606	0.294427	802	248	203	1781	79.2972	26.0318	29.0034	200.899
1663	chr14	60500000	61000000	1664	0.289645	8	4	127	34	0.790995	0.419867	18.145	3.83525
1695	chr14	76500000	77000000	1696	0.286077	140	0	299	0	13.8424	0	42.7193	0
1732	chr14	95000000	95500000	1733	0.284466	0	0	33	1	0	0	4.71483	0.112801
1723	chr14	90500000	91000000	1724	0.283086	8	8	100	62	0.790995	0.839734	14.2874	6.99368
1722	chr14	90000000	90500000	1723	0.274171	59	534	561	134	5.83359	56.0523	80.1522	15.1154
1729	chr14	93500000	94000000	1730	0.268705	79	2	186	543	7.81107	0.209934	26.5745	61.2511
1654	chr14	56000000	56500000	1655	0.256858	7	1	53	86	0.69212	0.104967	7.57231	9.70091
1655	chr14	56500000	57000000	1656	0.252037	11	642	194	3	1.08762	67.3887	27.7175	0.338404
1679	chr14	68500000	69000000	1680	0.249386	72	528	183	2018	7.11895	55.4225	26.1459	227.633
1698	chr14	78000000	78500000	1699	0.243913	543	2	53	0	53.6888	0.209934	7.57231	0
1664	chr14	61000000	61500000	1665	0.243775	8	17	16	1	0.790995	1.78444	2.28598	0.112801
1734	chr14	96000000	96500000	1735	0.23377	157	1111	61	2	15.5233	116.618	8.7153	0.225603
1590	chr14	24000000	24500000	1591	0.22581	705	2	24	3	69.7064	0.209934	3.42897	0.338404
1646	chr14	52000000	52500000	1647	0.217716	760	1083	48	4	75.1445	113.679	6.85794	0.451205
1665	chr14	61500000	62000000	1666	0.205714	518	7	18	1	51.2169	0.734768	2.57173	0.112801
1649	chr14	53500000	54000000	1650	0.20411	58	46	37	19	5.73471	4.82847	5.28633	2.14323
1721	chr14	89500000	90000000	1722	0.203681	52	55	280	5	5.14147	5.77317	40.0047	0.564007
1659	chr14	58500000	59000000	1660	0.191848	55	1105	248	1	5.43809	115.988	35.4327	0.112801
1584	chr14	21000000	21500000	1585	0.144862	20	550	38	1460	1.97749	57.7317	5.4292	164.69
1651	chr14	54500000	55000000	1652	0.14176	181	27	35	2	17.8963	2.8341	5.00058	0.225603
1676	chr14	67000000	67500000	1677	0.10029	16	32	185	7	1.58199	3.35894	26.4316	0.789609
1645	chr14	51500000	52000000	1646	0.0907202	8	7	6	33	0.790995	0.734768	0.857243	3.72244
1604	chr14	31000000	31500000	1605	0.0728777	41	4	112	29	4.05385	0.419867	16.0019	3.27124
1720	chr14	89000000	89500000	1721	0.0702092	4	0	54	5	0.395497	0	7.71518	0.564007
1731	chr14	94500000	95000000	1732	0.066933	4	6	0	0	0.395497	0.629801	0	0
1675	chr14	66500000	67000000	1676	0.0662467	0	0	4	129	0	0	0.571495	14.5514
1621	chr14	39500000	40000000	1622	-0.0443569	372	2096	266	100	36.7813	220.01	38.0044	11.2801
1666	chr14	62000000	62500000	1667	-0.0482858	9	511	14	287	0.889869	53.638	2.00023	32.374
1730	chr14	94000000	94500000	1731	-0.0559951	473	136	211	298	46.7676	14.2755	30.1464	33.6148
1705	chr14	81500000	82000000	1706	-0.0679125	11	4	144	1	1.08762	0.419867	20.5738	0.112801
1657	chr14	57500000	58000000	1658	-0.0845186	5	2	16	1	0.494372	0.209934	2.28598	0.112801
1704	chr14	81000000	81500000	1705	-0.154317	768	628	68	1	75.9355	65.9192	9.71542	0.112801
1606	chr14	32000000	32500000	1607	-0.172015	52	46	246	6	5.14147	4.82847	35.1469	0.676808
1607	chr14	32500000	33000000	1608	-0.17581	608	26	150	31	60.1156	2.72914	21.4311	3.49684
1650	chr14	54000000	54500000	1651	-0.180084	334	1234	71	1	33.024	129.529	10.144	0.112801
1661	chr14	59500000	60000000	1662	-0.196469	2	580	166	3	0.197749	60.8807	23.717	0.338404
1583	chr14	20500000	21000000	1584	-0.204077	375	15	312	3	37.0779	1.5745	44.5766	0.338404
1592	chr14	25000000	25500000	1593	-0.235889	155	126	259	551	15.3255	13.2258	37.0043	62.1535
1611	chr14	34500000	35000000	1612	-0.276226	93	2	377	6	9.19531	0.209934	53.8634	0.676808
1656	chr14	57000000	57500000	1657	-0.312003	8	3	0	14	0.790995	0.3149	0	1.57922
1699	chr14	78500000	79000000	1700	-0.337259	52	1536	17	2	5.14147	161.229	2.42885	0.225603
1669	chr14	63500000	64000000	1670	-0.416133	200	4	40	6	19.7749	0.419867	5.71495	0.676808
1615	chr14	36500000	37000000	1616	-0.455713	168	653	118	282	16.6109	68.5433	16.8591	31.81
1662	chr14	60000000	60500000	1663	-0.466803	12	8	217	6	1.18649	0.839734	31.0036	0.676808
1633	chr14	45500000	46000000	1634	-0.47279	41	13	178	6	4.05385	1.36457	25.4315	0.676808
1719	chr14	88500000	89000000	1720	-0.484911	43	257	13	129	4.2516	26.9765	1.85736	14.5514
1616	chr14	37000000	37500000	1617	-0.49723	651	6	28	5	64.3672	0.629801	4.00047	0.564007
1658	chr14	58000000	58500000	1659	-0.505034	393	634	9	110	38.8576	66.549	1.28586	12.4081
1660	chr14	59000000	59500000	1661	-0.599005	499	215	39	0	49.3383	22.5679	5.57208	0
1632	chr14	45000000	45500000	1633	-0.648603	14	10	17	292	1.38424	1.04967	2.42885	32.938
1610	chr14	34000000	34500000	1611	-0.698632	225	8	10	19	22.2467	0.839734	1.42874	2.14323
1667	chr14	62500000	63000000	1668	-0.764861	6	250	269	5	0.593246	26.2417	38.433	0.564007
1622	chr14	40000000	40500000	1623	-0.777067	253	19	23	1460	25.0152	1.99437	3.2861	164.69
1641	chr14	49500000	50000000	1642	-0.821537	65	153	101	295	6.42683	16.0599	14.4302	33.2764
1700	chr14	79000000	79500000	1701	-0.829516	354	386	14	1	35.0015	40.5172	2.00023	0.112801
1620	chr14	39000000	39500000	1621	-0.872472	140	3	19	11	13.8424	0.3149	2.7146	1.24081
1703	chr14	80500000	81000000	1704	-0.895784	19	262	244	1	1.87861	27.5013	34.8612	0.112801
1608	chr14	33000000	33500000	1609	-0.900084	9	2	369	62	0.889869	0.209934	52.7204	6.99368
1603	chr14	30500000	31000000	1604	-0.95079	427	65	113	4	42.2193	6.82284	16.1447	0.451205
1630	chr14	44000000	44500000	1631	-0.958805	6	1090	6	1	0.593246	114.414	0.857243	0.112801
1629	chr14	43500000	44000000	1630	-0.972183	13	153	379	27	1.28537	16.0599	54.1492	3.04564
1623	chr14	40500000	41000000	1624	-0.976388	63	63	4	172	6.22908	6.61291	0.571495	19.4018
1593	chr14	25500000	26000000	1594	-0.981985	11	219	109	2	1.08762	22.9877	15.5732	0.225603
1625	chr14	41500000	42000000	1626	-0.983977	7	881	12	10	0.69212	92.4758	1.71449	1.12801
1718	chr14	88000000	88500000	1719	-0.988052	79	14	1	235	7.81107	1.46954	0.142874	26.5083
1706	chr14	82000000	82500000	1707	-0.999829	782	4	12	1	77.3197	0.419867	1.71449	0.112801
1631	chr14	44500000	45000000	1632	-1.00359	10	245	40	16	0.988743	25.7169	5.71495	1.80482
1627	chr14	42500000	43000000	1628	-1.00597	9	100	55	0	0.889869	10.4967	7.85806	0
1626	chr14	42000000	42500000	1627	-1.00671	23	6	2	3	2.27411	0.629801	0.285748	0.338404
1628	chr14	43000000	43500000	1629	-1.00844	104	167	15	3	10.2829	17.5295	2.14311	0.338404
1624	chr14	41000000	41500000	1625	-1.01973	243	5	59	3	24.0265	0.524834	8.42955	0.338404
1714	chr14	86000000	86500000	1715	-1.05258	7	602	23	2	0.69212	63.19	3.2861	0.225603
1596	chr14	27000000	27500000	1597	-1.0666	196	49	158	6	19.3794	5.14337	22.5741	0.676808
1711	chr14	84500000	85000000	1712	-1.07128	4	20	2	1	0.395497	2.09934	0.285748	0.112801
1710	chr14	84000000	84500000	1711	-1.07136	215	33	52	88	21.258	3.4639	7.42944	9.92652
1594	chr14	26000000	26500000	1595	-1.08164	83	1262	226	2433	8.20657	132.468	32.2895	274.446
1595	chr14	26500000	27000000	1596	-1.08905	125	207	179	1	12.3593	21.7281	25.5744	0.112801
1713	chr14	85500000	86000000	1714	-1.10182	2	2	1	335	0.197749	0.209934	0.142874	37.7884
1609	chr14	33500000	34000000	1610	-1.11188	7	0	71	47	0.69212	0	10.144	5.30166
1638	chr14	48000000	48500000	1639	-1.12156	12	2	31	3	1.18649	0.209934	4.42909	0.338404
1668	chr14	63000000	63500000	1669	-1.13572	87	5	102	3	8.60207	0.524834	14.5731	0.338404
1712	chr14	85000000	85500000	1713	-1.13658	2	1	11	0	0.197749	0.104967	1.57161	0
1637	chr14	47500000	48000000	1638	-1.14448	433	4	287	560	42.8126	0.419867	41.0048	63.1687
1709	chr14	83500000	84000000	1710	-1.15614	0	295	29	45	0	30.9652	4.14334	5.07606
1639	chr14	48500000	49000000	1640	-1.16793	382	26	74	188	37.77	2.72914	10.5727	21.2066
1634	chr14	46000000	46500000	1635	-1.17942	13	16	125	4	1.28537	1.67947	17.8592	0.451205
1617	chr14	37500000	38000000	1618	-1.1828	198	5	291	7	19.5771	0.524834	41.5763	0.789609
1636	chr14	47000000	47500000	1637	-1.1829	795	5	132	173	78.6051	0.524834	18.8593	19.5146
1702	chr14	80000000	80500000	1703	-1.18604	181	7	5	17	17.8963	0.734768	0.714369	1.91762
1640	chr14	49000000	49500000	1641	-1.19316	359	728	18	390	35.4959	76.4158	2.57173	43.9925
1635	chr14	46500000	47000000	1636	-1.20667	11	3	133	7	1.08762	0.3149	19.0022	0.789609
1598	chr14	28000000	28500000	1599	-1.21499	13	215	44	2	1.28537	22.5679	6.28645	0.225603
1600	chr14	29000000	29500000	1601	-1.21525	9	1	8	1	0.889869	0.104967	1.14299	0.112801
1708	chr14	83000000	83500000	1709	-1.22632	155	6	113	44	15.3255	0.629801	16.1447	4.96326
1715	chr14	86500000	87000000	1716	-1.22801	12	3	117	6	1.18649	0.3149	16.7162	0.676808
1619	chr14	38500000	39000000	1620	-1.24761	29	856	113	6	2.86736	89.8516	16.1447	0.676808
1602	chr14	30000000	30500000	1603	-1.24995	5	2	74	390	0.494372	0.209934	10.5727	43.9925
1597	chr14	27500000	28000000	1598	-1.25208	80	9	11	142	7.90995	0.944701	1.57161	16.0178
1599	chr14	28500000	29000000	1600	-1.26058	7	11	278	5	0.69212	1.15463	39.7189	0.564007
1707	chr14	82500000	83000000	1708	-1.26257	15	5	7	2	1.48312	0.524834	1.00012	0.225603
1618	chr14	38000000	38500000	1619	-1.26727	7	5	275	47	0.69212	0.524834	39.2903	5.30166
1601	chr14	29500000	30000000	1602	-1.28676	5	14	22	9	0.494372	1.46954	3.14322	1.01521
1701	chr14	79500000	80000000	1702	-1.28861	96	7	16	1103	9.49194	0.734768	2.28598	124.42
1716	chr14	87000000	87500000	1717	-1.35161	4	124	1	129	0.395497	13.0159	0.142874	14.5514
1717	chr14	87500000	88000000	1718	-1.40495	278	130	6	3	27.4871	13.6457	0.857243	0.338404
1582	chr14	20000000	20500000	1583	-1.44565	154	42	170	6	15.2266	4.40861	24.2885	0.676808
1938	chr15	90500000	91000000	1939	0.756173	6	69	28	2	0.593246	7.24271	4.00047	0.225603
1840	chr15	41500000	42000000	1841	0.741693	134	5	149	3	13.2492	0.524834	21.2882	0.338404
1839	chr15	41000000	41500000	1840	0.717922	3	0	98	0	0.296623	0	14.0016	0
1838	chr15	40500000	41000000	1839	0.710697	27	0	0	352	2.66961	0	0	39.7061
1844	chr15	43500000	44000000	1845	0.702784	384	3	191	1	37.9677	0.3149	27.2889	0.112801
1939	chr15	91000000	91500000	1940	0.684567	42	0	0	429	4.15272	0	0	48.3918
1927	chr15	85000000	85500000	1928	0.681475	213	1	138	1	21.0602	0.104967	19.7166	0.112801
1908	chr15	75500000	76000000	1909	0.673694	621	0	75	12	61.401	0	10.7155	1.35362
1906	chr15	74500000	75000000	1907	0.657479	0	22	5	315	0	2.30927	0.714369	35.5324
1907	chr15	75000000	75500000	1908	0.656083	135	16	10	46	13.348	1.67947	1.42874	5.18886
1842	chr15	42500000	43000000	1843	0.650364	29	6	5	185	2.86736	0.629801	0.714369	20.8682
1886	chr15	64500000	65000000	1887	0.643597	6	1	363	1	0.593246	0.104967	51.8632	0.112801
1843	chr15	43000000	43500000	1844	0.635839	151	113	139	2	14.93	11.8612	19.8595	0.225603
1914	chr15	78500000	79000000	1915	0.627044	451	5	208	4	44.5923	0.524834	29.7177	0.451205
1887	chr15	65000000	65500000	1888	0.624231	91	2	46	1	8.99757	0.209934	6.57219	0.112801
1937	chr15	90000000	90500000	1938	0.614293	72	193	174	0	7.11895	20.2586	24.86	0
1888	chr15	65500000	66000000	1889	0.590158	7	0	27	200	0.69212	0	3.85759	22.5603
1885	chr15	64000000	64500000	1886	0.589484	327	0	234	1	32.3319	0	33.4325	0.112801
1890	chr15	66500000	67000000	1891	0.567182	0	113	0	740	0	11.8612	0	83.473
1874	chr15	58500000	59000000	1875	0.566316	310	0	272	554	30.651	0	38.8617	62.4919
1841	chr15	42000000	42500000	1842	0.640511	0	0	278	430	0	0	39.7189	48.5046
1837	chr15	40000000	40500000	1838	0.556063	1172	849	386	0	115.881	89.1168	55.1493	0
1936	chr15	89500000	90000000	1937	0.554088	354	2	223	3	35.0015	0.209934	31.8608	0.338404
1915	chr15	79000000	79500000	1916	0.3105	7	1064	2	0	0.69212	111.685	0.285748	0
1910	chr15	76500000	77000000	1911	0.30833	3	0	91	436	0.296623	0	13.0015	49.1814
1893	chr15	68000000	68500000	1894	0.54194	606	0	215	1	59.9179	0	30.7179	0.112801
1895	chr15	69000000	69500000	1896	-0.00186469	2	1	116	773	0.197749	0.104967	16.5734	87.1954
1884	chr15	63500000	64000000	1885	0.535312	442	1	9	1228	43.7025	0.104967	1.28586	138.52
1831	chr15	37000000	37500000	1832	-0.789333	0	0	181	2351	0	0	25.8602	265.196
1889	chr15	66000000	66500000	1890	0.529236	310	1138	21	1	30.651	119.452	3.00035	0.112801
1923	chr15	83000000	83500000	1924	0.521425	33	21	94	1	3.26285	2.2043	13.4301	0.112801
1905	chr15	74000000	74500000	1906	0.515197	26	3	29	1235	2.57073	0.3149	4.14334	139.31
1913	chr15	78000000	78500000	1914	0.508152	4	0	57	232	0.395497	0	8.1438	26.1699
1902	chr15	72500000	73000000	1903	0.50402	108	883	195	166	10.6784	92.6857	27.8604	18.725
1846	chr15	44500000	45000000	1847	0.501837	9	12	131	3	0.889869	1.2596	18.7165	0.338404
1911	chr15	77000000	77500000	1912	0.4853	629	4	144	39	62.192	0.419867	20.5738	4.39925
1891	chr15	67000000	67500000	1892	0.483969	294	7	3	12	29.0691	0.734768	0.428621	1.35362
1875	chr15	59000000	59500000	1876	0.479891	287	1	362	3	28.3769	0.104967	51.7203	0.338404
1892	chr15	67500000	68000000	1893	0.452308	50	3	294	96	4.94372	0.3149	42.0049	10.8289
1909	chr15	76000000	76500000	1910	0.435934	14	2	114	590	1.38424	0.209934	16.2876	66.5528
1928	chr15	85500000	86000000	1929	0.426318	78	120	141	7	7.7122	12.596	20.1452	0.789609
1877	chr15	60000000	60500000	1878	0.408538	4	4	40	22	0.395497	0.419867	5.71495	2.48163
1912	chr15	77500000	78000000	1913	0.360949	232	13	7	32	22.9388	1.36457	1.00012	3.60964
1845	chr15	44000000	44500000	1846	0.342878	222	5	242	842	21.9501	0.524834	34.5754	94.9787
1924	chr15	83500000	84000000	1925	0.326177	120	17	323	1503	11.8649	1.78444	46.1482	169.54
1847	chr15	45000000	45500000	1848	0.325869	238	8	394	5	23.5321	0.839734	56.2923	0.564007
1861	chr15	52000000	52500000	1862	0.301757	97	5	357	173	9.59081	0.524834	51.0059	19.5146
1871	chr15	57000000	57500000	1872	0.301064	442	18	291	0	43.7025	1.8894	41.5763	0
1858	chr15	50500000	51000000	1859	0.25986	200	0	47	0	19.7749	0	6.71507	0
1898	chr15	70500000	71000000	1899	0.252093	571	0	156	1776	56.4573	0	22.2883	200.335
1820	chr15	31500000	32000000	1821	0.229992	281	373	75	4	27.7837	39.1526	10.7155	0.451205
1876	chr15	59500000	60000000	1877	0.210355	4	10	16	715	0.395497	1.04967	2.28598	80.6529
1917	chr15	80000000	80500000	1918	0.208864	269	4	91	1054	26.5972	0.419867	13.0015	118.893
1904	chr15	73500000	74000000	1905	0.203565	8	7	44	16	0.790995	0.734768	6.28645	1.80482
1878	chr15	60500000	61000000	1879	0.203518	694	207	359	2	68.6188	21.7281	51.2917	0.225603
1929	chr15	86000000	86500000	1930	0.20014	1	1	243	0	0.0988743	0.104967	34.7183	0
1903	chr15	73000000	73500000	1904	0.196295	5	29	207	1	0.494372	3.04404	29.5749	0.112801
1836	chr15	39500000	40000000	1837	0.190146	19	191	19	0	1.87861	20.0487	2.7146	0
1881	chr15	62000000	62500000	1882	0.186651	1	2	266	5	0.0988743	0.209934	38.0044	0.564007
1957	chr15	100000000	100500000	1958	0.182765	308	1014	40	15	30.4533	106.436	5.71495	1.69202
1870	chr15	56500000	57000000	1871	0.173666	19	39	253	1713	1.87861	4.09371	36.1471	193.229
1883	chr15	63000000	63500000	1884	0.168883	34	0	94	1	3.36173	0	13.4301	0.112801
1819	chr15	31000000	31500000	1820	0.160874	38	9	78	412	3.75723	0.944701	11.1442	46.4741
1882	chr15	62500000	63000000	1883	0.153593	312	0	189	2	30.8488	0	27.0031	0.225603
1855	chr15	49000000	49500000	1856	0.148685	647	5	206	27	63.9717	0.524834	29.432	3.04564
1956	chr15	99500000	100000000	1957	0.137539	976	579	165	482	96.5014	60.7758	23.5742	54.3702
1901	chr15	72000000	72500000	1902	0.107561	3	2	78	421	0.296623	0.209934	11.1442	47.4894
1897	chr15	70000000	70500000	1898	0.0979254	203	288	239	19	20.0715	30.2304	34.1468	2.14323
1955	chr15	99000000	99500000	1956	0.0875462	46	1	45	245	4.54822	0.104967	6.42932	27.6363
1894	chr15	68500000	69000000	1895	0.0847391	1019	11	60	48	100.753	1.15463	8.57243	5.41446
1896	chr15	69500000	70000000	1897	0.0804143	67	2	55	20	6.62458	0.209934	7.85806	2.25603
1873	chr15	58000000	58500000	1874	0.0791089	215	56	11	3	21.258	5.87814	1.57161	0.338404
1935	chr15	89000000	89500000	1936	0.0408742	581	1	59	1	57.446	0.104967	8.42955	0.112801
1960	chr15	101500000	102000000	1961	0.0209659	93	1352	428	0	9.19531	141.915	61.15	0
1860	chr15	51500000	52000000	1861	0.0165407	7	6	128	7	0.69212	0.629801	18.2878	0.789609
1813	chr15	28000000	28500000	1814	0.0074375	216	2	4	1	21.3569	0.209934	0.571495	0.112801
1944	chr15	93500000	94000000	1945	-0.0049743	115	49	94	5	11.3705	5.14337	13.4301	0.564007
1834	chr15	38500000	39000000	1835	-0.00996871	21	62	288	719	2.07636	6.50794	41.1476	81.1042
1859	chr15	51000000	51500000	1860	-0.0112033	293	616	109	2	28.9702	64.6596	15.5732	0.225603
1812	chr15	27500000	28000000	1813	-0.0125687	312	1019	404	486	30.8488	106.961	57.721	54.8214
1872	chr15	57500000	58000000	1873	-0.023439	895	306	192	0	88.4925	32.1198	27.4318	0
1848	chr15	45500000	46000000	1849	-0.0297849	359	0	361	17	35.4959	0	51.5774	1.91762
1807	chr15	25000000	25500000	1808	-0.0339512	0	8	5	0	0	0.839734	0.714369	0
1916	chr15	79500000	80000000	1917	-0.0485543	153	4	243	0	15.1278	0.419867	34.7183	0
1862	chr15	52500000	53000000	1863	-0.0818787	275	527	305	43	27.1904	55.3175	43.5765	4.85046
1815	chr15	29000000	29500000	1816	-0.0917418	163	48	120	0	16.1165	5.03841	17.1449	0
1919	chr15	81000000	81500000	1920	-0.100651	405	1	66	2	40.0441	0.104967	9.42967	0.225603
1806	chr15	24500000	25000000	1807	-0.109172	374	34	245	226	36.979	3.56887	35.0041	25.4931
1879	chr15	61000000	61500000	1880	-0.112163	645	137	334	339	63.774	14.3805	47.7198	38.2396
1940	chr15	91500000	92000000	1941	-0.150015	209	597	32	17	20.6647	62.6652	4.57196	1.91762
1958	chr15	100500000	101000000	1959	-0.158546	14	1	59	3	1.38424	0.104967	8.42955	0.338404
1920	chr15	81500000	82000000	1921	-0.177004	4	383	350	4	0.395497	40.2023	50.0058	0.451205
1943	chr15	93000000	93500000	1944	-0.187975	104	6	51	496	10.2829	0.629801	7.28656	55.9495
1926	chr15	84500000	85000000	1927	-0.220467	319	72	8	12	31.5409	7.55761	1.14299	1.35362
1826	chr15	34500000	35000000	1827	-0.222427	3	28	260	16	0.296623	2.93907	37.1472	1.80482
1932	chr15	87500000	88000000	1933	-0.224445	582	1436	253	176	57.5449	150.732	36.1471	19.853
1921	chr15	82000000	82500000	1922	-0.23617	38	5	35	2	3.75723	0.524834	5.00058	0.225603
1808	chr15	25500000	26000000	1809	-0.239619	61	7	10	1	6.03134	0.734768	1.42874	0.112801
1854	chr15	48500000	49000000	1855	-0.266043	441	1369	210	164	43.6036	143.7	30.0035	18.4994
1961	chr15	102000000	102500000	1962	-0.311432	204	1	152	1249	20.1704	0.104967	21.7168	140.889
1934	chr15	88500000	89000000	1935	-0.329168	897	654	469	211	88.6903	68.6483	67.0078	23.8011
1899	chr15	71000000	71500000	1900	-0.33043	44	30	94	7	4.35047	3.149	13.4301	0.789609
1930	chr15	86500000	87000000	1931	-0.3728	239	1	194	1	23.631	0.104967	27.7175	0.112801
1856	chr15	49500000	50000000	1857	-0.383341	17	61	7	18	1.68086	6.40298	1.00012	2.03042
1959	chr15	101000000	101500000	1960	-0.387126	207	1047	327	1	20.467	109.9	46.7197	0.112801
1835	chr15	39000000	39500000	1836	-0.390561	12	374	149	101	1.18649	39.2576	21.2882	11.3929
1918	chr15	80500000	81000000	1919	-0.392899	18	0	103	0	1.77974	0	14.716	0
1825	chr15	34000000	34500000	1826	-0.403476	126	7	571	170	12.4582	0.734768	81.5809	19.1762
1869	chr15	56000000	56500000	1870	-0.441246	57	7	30	1131	5.63584	0.734768	4.28621	127.578
1925	chr15	84000000	84500000	1926	-0.448071	19	25	4	10	1.87861	2.62417	0.571495	1.12801
1933	chr15	88000000	88500000	1934	-0.460021	294	28	23	3	29.0691	2.93907	3.2861	0.338404
1802	chr15	22500000	23000000	1803	-0.493145	128	0	93	48	12.6559	0	13.2873	5.41446
1868	chr15	55500000	56000000	1869	-0.500549	171	11	299	13	16.9075	1.15463	42.7193	1.46642
1804	chr15	23500000	24000000	1805	-0.506333	242	1036	54	854	23.9276	108.746	7.71518	96.3323
1900	chr15	71500000	72000000	1901	-0.520217	382	1	101	59	37.77	0.104967	14.4302	6.65528
1821	chr15	32000000	32500000	1822	-0.52449	21	20	19	19	2.07636	2.09934	2.7146	2.14323
1857	chr15	50000000	50500000	1858	-0.553996	428	5	298	295	42.3182	0.524834	42.5764	33.2764
1805	chr15	24000000	24500000	1806	-0.568927	284	1	139	1	28.0803	0.104967	19.8595	0.112801
1827	chr15	35000000	35500000	1828	-0.577245	600	213	293	302	59.3246	22.3579	41.862	34.066
1931	chr15	87000000	87500000	1932	-0.58857	430	4	175	1	42.516	0.419867	25.0029	0.112801
1941	chr15	92000000	92500000	1942	-0.611781	597	0	13	1950	59.028	0	1.85736	219.963
1950	chr15	96500000	97000000	1951	-0.616585	756	1	241	65	74.749	0.104967	34.4326	7.33209
1880	chr15	61500000	62000000	1881	-0.617873	9	3	69	0	0.889869	0.3149	9.85829	0
1942	chr15	92500000	93000000	1943	-0.627908	442	0	267	69	43.7025	0	38.1473	7.78329
1849	chr15	46000000	46500000	1850	-0.649995	258	822	104	432	25.5096	86.2827	14.8589	48.7302
1811	chr15	27000000	27500000	1812	-0.651379	37	1142	10	0	3.65835	119.872	1.42874	0
1946	chr15	94500000	95000000	1947	-0.674604	276	84	23	77	27.2893	8.81721	3.2861	8.6857
1949	chr15	96000000	96500000	1950	-0.704479	1	8	264	362	0.0988743	0.839734	37.7187	40.8341
1954	chr15	98500000	99000000	1955	-0.717912	337	311	17	1407	33.3207	32.6447	2.42885	158.711
1945	chr15	94000000	94500000	1946	-0.743062	635	882	342	159	62.7852	92.5807	48.8628	17.9354
1809	chr15	26000000	26500000	1810	-0.745262	39	2	1	1405	3.8561	0.209934	0.142874	158.486
1833	chr15	38000000	38500000	1834	-0.775767	4	0	100	104	0.395497	0	14.2874	11.7313
1810	chr15	26500000	27000000	1811	-0.806557	11	0	342	0	1.08762	0	48.8628	0
1823	chr15	33000000	33500000	1824	-0.823427	11	3	512	212	1.08762	0.3149	73.1514	23.9139
1853	chr15	48000000	48500000	1854	-0.827311	173	123	90	527	17.1053	12.9109	12.8586	59.4463
1828	chr15	35500000	36000000	1829	-0.877476	12	20	62	322	1.18649	2.09934	8.85817	36.322
1830	chr15	36500000	37000000	1831	-0.878178	126	1	0	1	12.4582	0.104967	0	0.112801
1951	chr15	97000000	97500000	1952	-0.910523	391	1257	224	64	38.6599	131.943	32.0037	7.21928
1852	chr15	47500000	48000000	1853	-0.911715	93	11	274	1	9.19531	1.15463	39.1474	0.112801
1948	chr15	95500000	96000000	1949	-0.944437	11	0	130	1	1.08762	0	18.5736	0.112801
1824	chr15	33500000	34000000	1825	-0.958808	1093	612	212	6	108.07	64.2397	30.2892	0.676808
1816	chr15	29500000	30000000	1817	-0.975884	552	193	95	0	54.5786	20.2586	13.573	0
1947	chr15	95000000	95500000	1948	-0.994407	394	325	6	1	38.9565	34.1142	0.857243	0.112801
1817	chr15	30000000	30500000	1818	-1.02414	130	380	135	4	12.8537	39.8874	19.288	0.451205
1952	chr15	97500000	98000000	1953	-1.04186	361	260	294	8	35.6936	27.2914	42.0049	0.902411
1863	chr15	53000000	53500000	1864	-1.05581	175	4	50	114	17.303	0.419867	7.14369	12.8594
1829	chr15	36000000	36500000	1830	-1.07498	795	45	6	20	78.6051	4.72351	0.857243	2.25603
1953	chr15	98000000	98500000	1954	-1.07806	837	399	111	0	82.7578	41.8818	15.859	0
1850	chr15	46500000	47000000	1851	-1.11397	686	65	76	5	67.8278	6.82284	10.8584	0.564007
1851	chr15	47000000	47500000	1852	-1.11979	6	2	5	56	0.593246	0.209934	0.714369	6.31687
1832	chr15	37500000	38000000	1833	-1.14065	463	13	344	10	45.7788	1.36457	49.1486	1.12801
1867	chr15	55000000	55500000	1868	-1.17108	253	73	87	749	25.0152	7.66258	12.43	84.4882
1865	chr15	54000000	54500000	1866	-1.26534	265	4	13	860	26.2017	0.419867	1.85736	97.0091
1864	chr15	53500000	54000000	1865	-1.29918	295	234	11	45	29.1679	24.5622	1.57161	5.07606
1866	chr15	54500000	55000000	1867	-1.34001	273	98	98	15	26.9927	10.2867	14.0016	1.69202
2022	chr16	29500000	30000000	2023	0.798354	11	0	5	1	1.08762	0	0.714369	0.112801
2023	chr16	30000000	30500000	2024	0.792138	12	2	22	1538	1.18649	0.209934	3.14322	173.488
2020	chr16	28500000	29000000	2021	0.791471	385	34	107	34	38.0666	3.56887	15.2875	3.83525
2098	chr16	67500000	68000000	2099	0.787298	411	1	170	2	40.6374	0.104967	24.2885	0.225603
2097	chr16	67000000	67500000	2098	0.768945	167	8	284	255	16.512	0.839734	40.5761	28.7643
2024	chr16	30500000	31000000	2025	0.740341	0	0	371	7	0	0	53.0062	0.789609
2142	chr16	89500000	90000000	2143	0.727767	1	0	157	0	0.0988743	0	22.4312	0
1969	chr16	3000000	3500000	1970	0.72144	134	0	305	513	13.2492	0	43.5765	57.8671
2099	chr16	68000000	68500000	2100	0.708152	335	1	161	1	33.1229	0.104967	23.0027	0.112801
1968	chr16	2500000	3000000	1969	0.701461	4	3	12	1	0.395497	0.3149	1.71449	0.112801
2141	chr16	89000000	89500000	2142	0.675459	422	4	9	2	41.725	0.419867	1.28586	0.225603
2140	chr16	88500000	89000000	2141	0.674754	102	525	0	25	10.0852	55.1076	0	2.82003
1967	chr16	2000000	2500000	1968	0.668163	0	0	4	1	0	0	0.571495	0.112801
1963	chr16	0	500000	1964	0.629057	0	0	1	0	0	0	0.142874	0
1966	chr16	1500000	2000000	1967	0.624287	2	19	93	43	0.197749	1.99437	13.2873	4.85046
2103	chr16	70000000	70500000	2104	0.623441	217	5	225	2	21.4557	0.524834	32.1466	0.225603
1972	chr16	4500000	5000000	1973	0.617733	1	0	12	287	0.0988743	0	1.71449	32.374
1964	chr16	500000	1000000	1965	0.608087	1	0	0	0	0.0988743	0	0	0
1970	chr16	3500000	4000000	1971	0.597203	1	0	505	2	0.0988743	0	72.1512	0.225603
1995	chr16	16000000	16500000	1996	0.582609	39	30	23	220	3.8561	3.149	3.2861	24.8163
2007	chr16	22000000	22500000	2008	0.550345	3	14	306	280	0.296623	1.46954	43.7194	31.5844
1965	chr16	1000000	1500000	1966	0.550258	0	2	25	1	0	0.209934	3.57184	0.112801
2101	chr16	69000000	69500000	2102	0.525378	105	12	482	13	10.3818	1.2596	68.8652	1.46642
2006	chr16	21500000	22000000	2007	0.521324	408	4	165	881	40.3407	0.419867	23.5742	99.378
2112	chr16	74500000	75000000	2113	0.453999	2	1	246	618	0.197749	0.104967	35.1469	69.7112
2138	chr16	87500000	88000000	2139	0.497337	700	1	0	2	69.212	0.104967	0	0.225603
2076	chr16	56500000	57000000	2077	0.208379	4	1	5	1309	0.395497	0.104967	0.714369	147.657
1971	chr16	4000000	4500000	1972	0.490796	72	0	2	0	7.11895	0	0.285748	0
2102	chr16	69500000	70000000	2103	0.481982	78	191	159	790	7.7122	20.0487	22.7169	89.113
2096	chr16	66500000	67000000	2097	0.472352	709	0	392	1328	70.1019	0	56.0065	149.8
2104	chr16	70500000	71000000	2105	0.461389	208	182	3	220	20.5659	19.104	0.428621	24.8163
1994	chr16	15500000	16000000	1995	0.446892	134	15	98	0	13.2492	1.5745	14.0016	0
2077	chr16	57000000	57500000	2078	0.425792	5	2	9	2	0.494372	0.209934	1.28586	0.225603
2019	chr16	28000000	28500000	2020	0.423267	652	19	245	213	64.4661	1.99437	35.0041	24.0267
1992	chr16	14500000	15000000	1993	0.39427	943	48	286	1225	93.2385	5.03841	40.8619	138.182
2010	chr16	23500000	24000000	2011	0.394149	44	415	86	0	4.35047	43.5612	12.2871	0
1986	chr16	11500000	12000000	1987	0.377388	931	0	91	0	92.052	0	13.0015	0
2100	chr16	68500000	69000000	2101	0.352112	3	4	33	124	0.296623	0.419867	4.71483	13.9874
2106	chr16	71500000	72000000	2107	0.351383	210	4	391	686	20.7636	0.419867	55.8636	77.3817
2071	chr16	54000000	54500000	2072	0.350221	190	2	223	3	18.7861	0.209934	31.8608	0.338404
2025	chr16	31000000	31500000	2026	0.31189	20	0	19	94	1.97749	0	2.7146	10.6033
2078	chr16	57500000	58000000	2079	0.299277	3	356	115	958	0.296623	37.3682	16.4305	108.064
2113	chr16	75000000	75500000	2114	0.289413	7	11	48	3	0.69212	1.15463	6.85794	0.338404
2134	chr16	85500000	86000000	2135	0.284535	3	1	4	20	0.296623	0.104967	0.571495	2.25603
1985	chr16	11000000	11500000	1986	0.27102	1	0	306	1	0.0988743	0	43.7194	0.112801
2072	chr16	54500000	55000000	2073	0.270956	792	1639	196	49	78.3085	172.041	28.0033	5.52726
2132	chr16	84500000	85000000	2133	0.208146	1	0	0	11	0.0988743	0	0	1.24081
1987	chr16	12000000	12500000	1988	0.205132	274	661	154	3	27.0916	69.3831	22.0026	0.338404
1988	chr16	12500000	13000000	1989	0.184186	547	1	381	37	54.0843	0.104967	54.4349	4.17365
2105	chr16	71000000	71500000	2106	0.184072	481	379	270	138	47.5586	39.7824	38.5759	15.5666
2133	chr16	85000000	85500000	2134	0.170273	359	0	7	4	35.4959	0	1.00012	0.451205
2139	chr16	88000000	88500000	2140	0.169904	357	0	366	0	35.2981	0	52.2918	0
2070	chr16	53500000	54000000	2071	0.138438	728	1467	144	5	71.9805	153.986	20.5738	0.564007
2005	chr16	21000000	21500000	2006	0.123828	100	21	405	389	9.88743	2.2043	57.8639	43.8797
2057	chr16	47000000	47500000	2058	0.12194	22	329	90	833	2.17524	34.5341	12.8586	93.9635
2056	chr16	46500000	47000000	2057	0.101458	132	549	256	25	13.0514	57.6268	36.5757	2.82003
2063	chr16	50000000	50500000	2064	0.081751	0	1315	375	452	0	138.031	53.5777	50.9862
1991	chr16	14000000	14500000	1992	0.0796981	310	124	309	21	30.651	13.0159	44.148	2.36883
2017	chr16	27000000	27500000	2018	0.053318	1314	1	320	0	129.921	0.104967	45.7196	0
2009	chr16	23000000	23500000	2010	0.0511929	731	6	341	3	72.2771	0.629801	48.72	0.338404
2012	chr16	24500000	25000000	2013	0.0357419	29	42	171	1742	2.86736	4.40861	24.4314	196.5
2079	chr16	58000000	58500000	2080	0.0292568	233	521	231	0	23.0377	54.6877	33.0038	0
2026	chr16	31500000	32000000	2027	-0.00208146	430	11	71	9	42.516	1.15463	10.144	1.01521
2055	chr16	46000000	46500000	2056	-0.0035917	304	1	0	1	30.0578	0.104967	0	0.112801
2125	chr16	81000000	81500000	2126	-0.00967958	0	61	154	0	0	6.40298	22.0026	0
2131	chr16	84000000	84500000	2132	-0.0108518	133	23	17	4	13.1503	2.41424	2.42885	0.451205
2126	chr16	81500000	82000000	2127	-0.0217821	125	0	373	85	12.3593	0	53.2919	9.58811
2107	chr16	72000000	72500000	2108	-0.0442012	176	1	226	4	17.4019	0.104967	32.2895	0.451205
2121	chr16	79000000	79500000	2122	-0.0489525	630	35	486	3	62.2908	3.67384	69.4366	0.338404
2008	chr16	22500000	23000000	2009	-0.0520819	447	782	128	7	44.1968	82.084	18.2878	0.789609
2013	chr16	25000000	25500000	2014	-0.0738753	326	378	95	127	32.233	39.6775	13.573	14.3258
1997	chr16	17000000	17500000	1998	-0.0836473	39	879	304	2	3.8561	92.2658	43.4336	0.225603
2018	chr16	27500000	28000000	2019	-0.08491	183	1051	54	2	18.094	110.32	7.71518	0.225603
2108	chr16	72500000	73000000	2109	-0.0884454	440	7	13	5	43.5047	0.734768	1.85736	0.564007
2111	chr16	74000000	74500000	2112	-0.109942	36	22	83	0	3.55948	2.30927	11.8585	0
1980	chr16	8500000	9000000	1981	-0.110982	500	49	20	1	49.4372	5.14337	2.85748	0.112801
2059	chr16	48000000	48500000	2060	-0.151076	388	3	379	0	38.3632	0.3149	54.1492	0
2137	chr16	87000000	87500000	2138	-0.159215	459	348	16	1	45.3833	36.5284	2.28598	0.112801
2069	chr16	53000000	53500000	2070	-0.168587	45	93	42	56	4.44935	9.76191	6.0007	6.31687
2002	chr16	19500000	20000000	2003	-0.18571	18	155	8	25	1.77974	16.2699	1.14299	2.82003
1981	chr16	9000000	9500000	1982	-0.189773	261	1	320	0	25.8062	0.104967	45.7196	0
2004	chr16	20500000	21000000	2005	-0.209209	227	1	25	192	22.4445	0.104967	3.57184	21.6579
2114	chr16	75500000	76000000	2115	-0.228142	89	3	471	13	8.79982	0.3149	67.2935	1.46642
2058	chr16	47500000	48000000	2059	-0.2646	136	19	12	1054	13.4469	1.99437	1.71449	118.893
2011	chr16	24000000	24500000	2012	-0.28528	617	0	32	441	61.0055	0	4.57196	49.7454
2119	chr16	78000000	78500000	2120	-0.287063	41	92	278	0	4.05385	9.65695	39.7189	0
2080	chr16	58500000	59000000	2081	-0.287633	897	13	183	488	88.6903	1.36457	26.1459	55.047
2109	chr16	73000000	73500000	2110	-0.300602	110	0	146	19	10.8762	0	20.8596	2.14323
2120	chr16	78500000	79000000	2121	-0.305173	1304	12	94	1	128.932	1.2596	13.4301	0.112801
2030	chr16	33500000	34000000	2031	-0.325831	1215	24	178	6	120.132	2.5192	25.4315	0.676808
2001	chr16	19000000	19500000	2002	-0.333111	0	0	134	0	0	0	19.1451	0
1998	chr16	17500000	18000000	1999	-0.357746	344	2	208	9	34.0128	0.209934	29.7177	1.01521
1984	chr16	10500000	11000000	1985	-0.483752	100	4	201	2	9.88743	0.419867	28.7176	0.225603
2073	chr16	55000000	55500000	2074	-0.497674	31	1	535	10	3.0651	0.104967	76.4375	1.12801
1989	chr16	13000000	13500000	1990	-0.535337	264	1	437	81	26.1028	0.104967	62.4358	9.13691
2062	chr16	49500000	50000000	2063	-0.559346	3	2	82	1	0.296623	0.209934	11.7156	0.112801
2075	chr16	56000000	56500000	2076	-0.571643	268	1216	209	3	26.4983	127.64	29.8606	0.338404
1973	chr16	5000000	5500000	1974	-0.582663	4	45	77	548	0.395497	4.72351	11.0013	61.8151
2122	chr16	79500000	80000000	2123	-0.601341	836	316	13	862	82.659	33.1695	1.85736	97.2347
2110	chr16	73500000	74000000	2111	-0.660491	7	18	5	187	0.69212	1.8894	0.714369	21.0938
2064	chr16	50500000	51000000	2065	-0.664871	901	1	99	153	89.0858	0.104967	14.1445	17.2586
2135	chr16	86000000	86500000	2136	-0.675074	8	7	5	400	0.790995	0.734768	0.714369	45.1205
2088	chr16	62500000	63000000	2089	-0.679873	386	614	39	132	38.1655	64.4496	5.57208	14.8898
2089	chr16	63000000	63500000	2090	-0.696558	496	1496	133	745	49.0417	157.03	19.0022	84.037
2087	chr16	62000000	62500000	2088	-0.70564	1	2	44	0	0.0988743	0.209934	6.28645	0
2090	chr16	63500000	64000000	2091	-0.705835	153	7	6	5	15.1278	0.734768	0.857243	0.564007
2117	chr16	77000000	77500000	2118	-0.715567	1	0	63	21	0.0988743	0	9.00105	2.36883
1990	chr16	13500000	14000000	1991	-0.737469	564	114	111	2	55.7651	11.9662	15.859	0.225603
1983	chr16	10000000	10500000	1984	-0.746269	41	3	576	915	4.05385	0.3149	82.2953	103.213
2091	chr16	64000000	64500000	2092	-0.749736	223	0	95	341	22.049	0	13.573	38.4653
2124	chr16	80500000	81000000	2125	-0.753459	10	1574	57	28	0.988743	165.218	8.1438	3.15844
2136	chr16	86500000	87000000	2137	-0.756765	523	0	41	76	51.7113	0	5.85782	8.5729
2086	chr16	61500000	62000000	2087	-0.760087	247	531	438	6	24.422	55.7374	62.5787	0.676808
2127	chr16	82000000	82500000	2128	-0.761086	63	21	70	106	6.22908	2.2043	10.0012	11.9569
2060	chr16	48500000	49000000	2061	-0.773421	108	3	9	3	10.6784	0.3149	1.28586	0.338404
2085	chr16	61000000	61500000	2086	-0.795619	28	1863	640	5	2.76848	195.553	91.4392	0.564007
2084	chr16	60500000	61000000	2085	-0.808232	187	5	59	407	18.4895	0.524834	8.42955	45.9101
2118	chr16	77500000	78000000	2119	-0.828188	80	33	68	759	7.90995	3.4639	9.71542	85.6162
2083	chr16	60000000	60500000	2084	-0.86572	11	2	277	331	1.08762	0.209934	39.576	37.3372
2092	chr16	64500000	65000000	2093	-0.877105	61	399	282	31	6.03134	41.8818	40.2904	3.49684
2095	chr16	66000000	66500000	2096	-0.90106	298	76	7	199	29.4646	7.97748	1.00012	22.4475
2082	chr16	59500000	60000000	2083	-0.919671	1464	119	331	1002	144.752	12.4911	47.2912	113.027
2014	chr16	25500000	26000000	2015	-0.921769	3	0	129	49	0.296623	0	18.4307	5.52726
2074	chr16	55500000	56000000	2075	-0.924331	545	2	254	484	53.8865	0.209934	36.2899	54.5958
2081	chr16	59000000	59500000	2082	-0.926111	460	349	204	13	45.4822	36.6334	29.1462	1.46642
2003	chr16	20000000	20500000	2004	-0.967527	0	1	335	0	0	0.104967	47.8627	0
2016	chr16	26500000	27000000	2017	-0.977225	192	0	280	2	18.9839	0	40.0047	0.225603
2130	chr16	83500000	84000000	2131	-0.988887	29	215	144	1	2.86736	22.5679	20.5738	0.112801
2123	chr16	80000000	80500000	2124	-1.00287	218	2032	64	9	21.5546	213.293	9.14392	1.01521
2116	chr16	76500000	77000000	2117	-1.01821	385	0	169	0	38.0666	0	24.1457	0
2115	chr16	76000000	76500000	2116	-1.02534	33	2	3	472	3.26285	0.209934	0.428621	53.2422
1982	chr16	9500000	10000000	1983	-1.10394	26	569	31	8	2.57073	59.7261	4.42909	0.902411
2061	chr16	49000000	49500000	2062	-1.10765	101	194	99	11	9.98631	20.3636	14.1445	1.24081
2015	chr16	26000000	26500000	2016	-1.10997	813	59	404	608	80.3848	6.19304	57.721	68.5832
2093	chr16	65000000	65500000	2094	-1.11091	121	41	233	2	11.9638	4.30364	33.2896	0.225603
2128	chr16	82500000	83000000	2129	-1.13461	537	95	424	52	53.0955	9.97185	60.5785	5.86567
1979	chr16	8000000	8500000	1980	-1.21021	1	349	60	22	0.0988743	36.6334	8.57243	2.48163
1974	chr16	5500000	6000000	1975	-1.21932	17	6	15	1	1.68086	0.629801	2.14311	0.112801
2068	chr16	52500000	53000000	2069	-1.2815	4	328	57	10	0.395497	34.4291	8.1438	1.12801
1976	chr16	6500000	7000000	1977	-1.29844	110	2	164	696	10.8762	0.209934	23.4313	78.5097
2094	chr16	65500000	66000000	2095	-1.3023	562	26	632	3	55.5674	2.72914	90.2962	0.338404
2067	chr16	52000000	52500000	2068	-1.31287	680	22	19	42	67.2346	2.30927	2.7146	4.73766
1977	chr16	7000000	7500000	1978	-1.35766	59	816	15	0	5.83359	85.6529	2.14311	0
1978	chr16	7500000	8000000	1979	-1.37583	202	11	101	0	19.9726	1.15463	14.4302	0
2065	chr16	51000000	51500000	2066	-1.38345	579	289	63	3	57.2482	30.3354	9.00105	0.338404
2066	chr16	51500000	52000000	2067	-1.38491	1026	21	136	331	101.445	2.2043	19.4308	37.3372
1975	chr16	6000000	6500000	1976	-1.39109	41	173	244	10	4.05385	18.1593	34.8612	1.12801
2129	chr16	83000000	83500000	2130	-1.43627	180	39	347	195	17.7974	4.09371	49.5772	21.9963
2291	chr17	73500000	74000000	2292	0.876298	0	0	217	3	0	0	31.0036	0.338404
2290	chr17	73000000	73500000	2291	0.853638	538	2	24	1	53.1944	0.209934	3.42897	0.112801
2198	chr17	27000000	27500000	2199	0.838604	0	1	106	1	0	0.104967	15.1446	0.112801
2158	chr17	7000000	7500000	2159	0.824758	2	101	1	3	0.197749	10.6016	0.142874	0.338404
2292	chr17	74000000	74500000	2293	0.800713	48	2	518	636	4.74597	0.209934	74.0086	71.7416
2180	chr17	18000000	18500000	2181	0.788715	16	54	46	1	1.58199	5.66821	6.57219	0.112801
2304	chr17	80000000	80500000	2305	0.748416	3	0	70	3	0.296623	0	10.0012	0.338404
2159	chr17	7500000	8000000	2160	0.731904	0	2	77	6	0	0.209934	11.0013	0.676808
2225	chr17	40500000	41000000	2226	0.716243	1	2	253	1	0.0988743	0.209934	36.1471	0.112801
2228	chr17	42000000	42500000	2229	0.715315	10	0	3	0	0.988743	0	0.428621	0
2303	chr17	79500000	80000000	2304	0.714561	0	22	143	1	0	2.30927	20.4309	0.112801
2230	chr17	43000000	43500000	2231	0.708974	0	1	228	0	0	0.104967	32.5752	0
2217	chr17	36500000	37000000	2218	0.708966	545	2	1	0	53.8865	0.209934	0.142874	0
2160	chr17	8000000	8500000	2161	0.707686	246	0	389	0	24.3231	0	55.5779	0
2220	chr17	38000000	38500000	2221	0.69378	6	1	27	0	0.593246	0.104967	3.85759	0
2224	chr17	40000000	40500000	2225	0.69178	0	2	202	0	0	0.209934	28.8605	0
2219	chr17	37500000	38000000	2220	0.661578	76	115	276	0	7.51445	12.0712	39.4332	0
2218	chr17	37000000	37500000	2219	0.659707	1	0	86	0	0.0988743	0	12.2871	0
2229	chr17	42500000	43000000	2230	0.657788	4	1	14	5	0.395497	0.104967	2.00023	0.564007
2179	chr17	17500000	18000000	2180	0.656389	279	449	88	14	27.5859	47.1301	12.5729	1.57922
2302	chr17	79000000	79500000	2303	0.651927	126	0	1	0	12.4582	0	0.142874	0
2293	chr17	74500000	75000000	2294	0.645747	1	14	134	1	0.0988743	1.46954	19.1451	0.112801
2199	chr17	27500000	28000000	2200	0.629189	31	1	8	0	3.0651	0.104967	1.14299	0
2152	chr17	4000000	4500000	2153	0.626204	4	2	98	5	0.395497	0.209934	14.0016	0.564007
2178	chr17	17000000	17500000	2179	0.624868	1	225	130	76	0.0988743	23.6175	18.5736	8.5729
2153	chr17	4500000	5000000	2154	0.619541	0	1100	126	0	0	115.463	18.0021	0
2305	chr17	80500000	81000000	2306	0.597126	323	0	111	213	31.9364	0	15.859	24.0267
2294	chr17	75000000	75500000	2295	0.595639	0	0	147	0	0	0	21.0024	0
2147	chr17	1500000	2000000	2148	0.590952	134	2	2	282	13.2492	0.209934	0.285748	31.81
2181	chr17	18500000	19000000	2182	0.57119	55	114	268	0	5.43809	11.9662	38.2902	0
2268	chr17	62000000	62500000	2269	0.569655	31	0	129	610	3.0651	0	18.4307	68.8088
2176	chr17	16000000	16500000	2177	0.568929	0	197	270	51	0	20.6785	38.5759	5.75287
2301	chr17	78500000	79000000	2302	0.555433	0	0	2	0	0	0	0.285748	0
2239	chr17	47500000	48000000	2240	0.552508	1	5	4	125	0.0988743	0.524834	0.571495	14.1002
2151	chr17	3500000	4000000	2152	0.550474	3	0	46	1	0.296623	0	6.57219	0.112801
2201	chr17	28500000	29000000	2202	0.5498	6	1	193	150	0.593246	0.104967	27.5746	16.9202
2296	chr17	76000000	76500000	2297	0.54906	1	3	90	2	0.0988743	0.3149	12.8586	0.225603
2235	chr17	45500000	46000000	2236	0.54301	10	0	107	19	0.988743	0	15.2875	2.14323
2240	chr17	48000000	48500000	2241	0.53852	0	0	80	0	0	0	11.4299	0
2148	chr17	2000000	2500000	2149	0.537417	15	0	243	136	1.48312	0	34.7183	15.341
2297	chr17	76500000	77000000	2298	0.533733	0	265	208	304	0	27.8162	29.7177	34.2916
2211	chr17	33500000	34000000	2212	0.531944	1151	1536	143	4	113.804	161.229	20.4309	0.451205
2269	chr17	62500000	63000000	2270	0.51647	149	56	183	2	14.7323	5.87814	26.1459	0.225603
2215	chr17	35500000	36000000	2216	0.514354	2	1	97	1	0.197749	0.104967	13.8588	0.112801
2295	chr17	75500000	76000000	2296	0.512073	339	0	38	644	33.5184	0	5.4292	72.6441
2300	chr17	78000000	78500000	2301	0.511871	0	0	1	1	0	0	0.142874	0.112801
2146	chr17	1000000	1500000	2147	0.505445	11	13	10	86	1.08762	1.36457	1.42874	9.70091
2202	chr17	29000000	29500000	2203	0.493239	224	1270	1	38	22.1479	133.308	0.142874	4.28645
2256	chr17	56000000	56500000	2257	0.487473	4	5	245	318	0.395497	0.524834	35.0041	35.8708
2238	chr17	47000000	47500000	2239	0.479528	42	0	34	994	4.15272	0	4.85771	112.125
2267	chr17	61500000	62000000	2268	0.476759	160	0	13	0	15.8199	0	1.85736	0
2259	chr17	57500000	58000000	2260	0.442619	2	5	369	1359	0.197749	0.524834	52.7204	153.297
2226	chr17	41000000	41500000	2227	0.462946	181	598	120	2	17.8963	62.7702	17.1449	0.225603
2216	chr17	36000000	36500000	2217	0.455879	1	55	252	0	0.0988743	5.77317	36.0042	0
2241	chr17	48500000	49000000	2242	0.372049	0	1	13	673	0	0.104967	1.85736	75.9153
2246	chr17	51000000	51500000	2247	-1.055	370	266	1	0	36.5835	27.9212	0.142874	0
2204	chr17	30000000	30500000	2205	0.40733	33	4	72	1	3.26285	0.419867	10.2869	0.112801
2237	chr17	46500000	47000000	2238	0.40184	1	4	70	1	0.0988743	0.419867	10.0012	0.112801
2258	chr17	57000000	57500000	2259	0.395159	1	1	176	0	0.0988743	0.104967	25.1458	0
2157	chr17	6500000	7000000	2158	0.384451	6	59	113	3	0.593246	6.19304	16.1447	0.338404
2200	chr17	28000000	28500000	2201	0.380326	1230	6	175	9	121.615	0.629801	25.0029	1.01521
2177	chr17	16500000	17000000	2178	0.37998	10	1	13	3	0.988743	0.104967	1.85736	0.338404
2203	chr17	29500000	30000000	2204	0.363806	307	3	24	326	30.3544	0.3149	3.42897	36.7732
2236	chr17	46000000	46500000	2237	0.361891	149	0	2	55	14.7323	0	0.285748	6.20407
2145	chr17	500000	1000000	2146	0.358093	204	0	340	451	20.1704	0	48.5771	50.8734
2154	chr17	5000000	5500000	2155	0.356901	311	0	250	68	30.7499	0	35.7184	7.67049
2260	chr17	58000000	58500000	2261	0.352653	56	15	70	532	5.53696	1.5745	10.0012	60.0103
2257	chr17	56500000	57000000	2258	0.349967	38	0	120	31	3.75723	0	17.1449	3.49684
2299	chr17	77500000	78000000	2300	0.349839	0	1	68	121	0	0.104967	9.71542	13.649
2234	chr17	45000000	45500000	2235	0.347173	63	87	130	6	6.22908	9.13211	18.5736	0.676808
2197	chr17	26500000	27000000	2198	0.335103	845	8	14	5	83.5488	0.839734	2.00023	0.564007
2149	chr17	2500000	3000000	2150	0.330331	67	4	137	1	6.62458	0.419867	19.5737	0.112801
2289	chr17	72500000	73000000	2290	0.327832	6	4	14	6	0.593246	0.419867	2.00023	0.676808
2205	chr17	30500000	31000000	2206	0.298274	321	0	39	0	31.7387	0	5.57208	0
2175	chr17	15500000	16000000	2176	0.27862	54	71	148	0	5.33921	7.45264	21.1453	0
2212	chr17	34000000	34500000	2213	0.2757	112	401	508	1584	11.0739	42.0917	72.5799	178.677
2276	chr17	66000000	66500000	2277	0.258353	241	430	35	23	23.8287	45.1357	5.00058	2.59443
2221	chr17	38500000	39000000	2222	0.23376	219	0	0	384	21.6535	0	0	43.3157
2161	chr17	8500000	9000000	2162	0.224084	0	0	202	3	0	0	28.8605	0.338404
2214	chr17	35000000	35500000	2215	0.192006	1	36	35	33	0.0988743	3.77881	5.00058	3.72244
2261	chr17	58500000	59000000	2262	0.181142	12	2	78	22	1.18649	0.209934	11.1442	2.48163
2275	chr17	65500000	66000000	2276	0.178943	60	6	349	1	5.93246	0.629801	49.8629	0.112801
2227	chr17	41500000	42000000	2228	0.173251	2	48	41	1	0.197749	5.03841	5.85782	0.112801
2254	chr17	55000000	55500000	2255	0.139266	82	1	6	0	8.1077	0.104967	0.857243	0
2270	chr17	63000000	63500000	2271	0.13791	13	1	124	2	1.28537	0.104967	17.7163	0.225603
2144	chr17	0	500000	2145	0.127845	3	2	0	0	0.296623	0.209934	0	0
2263	chr17	59500000	60000000	2264	0.0851803	694	10	7	3	68.6188	1.04967	1.00012	0.338404
2255	chr17	55500000	56000000	2256	0.0656713	515	70	55	11	50.9203	7.34768	7.85806	1.24081
2274	chr17	65000000	65500000	2275	0.0326545	415	108	195	1	41.0329	11.3364	27.8604	0.112801
2265	chr17	60500000	61000000	2266	-0.00305542	1	3	16	10	0.0988743	0.3149	2.28598	1.12801
2264	chr17	60000000	60500000	2265	-0.0257093	133	2	430	14	13.1503	0.209934	61.4357	1.57922
2272	chr17	64000000	64500000	2273	-0.047838	26	0	406	0	2.57073	0	58.0067	0
2210	chr17	33000000	33500000	2211	-0.0499069	5	0	0	0	0.494372	0	0	0
2253	chr17	54500000	55000000	2254	-0.0592428	379	0	77	660	37.4734	0	11.0013	74.4489
2271	chr17	63500000	64000000	2272	-0.0726128	58	9	48	1	5.73471	0.944701	6.85794	0.112801
2209	chr17	32500000	33000000	2210	-0.0743012	11	32	38	713	1.08762	3.35894	5.4292	80.4273
2252	chr17	54000000	54500000	2253	-0.0815906	80	1750	83	32	7.90995	183.692	11.8585	3.60964
2223	chr17	39500000	40000000	2224	-0.0860523	82	15	643	42	8.1077	1.5745	91.8678	4.73766
2242	chr17	49000000	49500000	2243	-0.101493	1138	323	83	52	112.519	33.9043	11.8585	5.86567
2266	chr17	61000000	61500000	2267	-0.103164	35	1	178	17	3.4606	0.104967	25.4315	1.91762
2262	chr17	59000000	59500000	2263	-0.126948	746	15	116	3	73.7603	1.5745	16.5734	0.338404
2298	chr17	77000000	77500000	2299	-0.203045	0	9	0	241	0	0.944701	0	27.1851
2150	chr17	3000000	3500000	2151	-0.211688	36	6	134	7	3.55948	0.629801	19.1451	0.789609
2182	chr17	19000000	19500000	2183	-0.218824	167	681	437	1154	16.512	71.4824	62.4358	130.173
2184	chr17	20000000	20500000	2185	-0.223613	315	26	203	3	31.1454	2.72914	29.0034	0.338404
2286	chr17	71000000	71500000	2287	-0.263017	165	0	410	1	16.3143	0	58.5782	0.112801
2288	chr17	72000000	72500000	2289	-0.264866	51	0	238	0	5.04259	0	34.004	0
2172	chr17	14000000	14500000	2173	-0.266513	505	0	190	385	49.9315	0	27.146	43.4285
2196	chr17	26000000	26500000	2197	-0.310136	405	6	272	580	40.0441	0.629801	38.8617	65.4248
2162	chr17	9000000	9500000	2163	-0.325042	329	1	229	116	32.5297	0.104967	32.7181	13.085
2183	chr17	19500000	20000000	2184	-0.336609	5	36	58	10	0.494372	3.77881	8.28668	1.12801
2163	chr17	9500000	10000000	2164	-0.396423	366	404	324	52	36.188	42.4066	46.2911	5.86567
2273	chr17	64500000	65000000	2274	-0.406931	1356	6	188	536	134.074	0.629801	26.8603	60.4615
2164	chr17	10000000	10500000	2165	-0.436236	348	5	43	599	34.4083	0.524834	6.14357	67.568
2195	chr17	25500000	26000000	2196	-0.438616	153	1	237	3	15.1278	0.104967	33.8611	0.338404
2186	chr17	21000000	21500000	2187	-0.454379	24	1	12	428	2.37298	0.104967	1.71449	48.279
2156	chr17	6000000	6500000	2157	-0.530271	1052	4	2	0	104.016	0.419867	0.285748	0
2185	chr17	20500000	21000000	2186	-0.565542	58	0	217	132	5.73471	0	31.0036	14.8898
2285	chr17	70500000	71000000	2286	-0.57844	18	345	316	57	1.77974	36.2135	45.1481	6.42968
2287	chr17	71500000	72000000	2288	-0.582385	215	222	229	0	21.258	23.3026	32.7181	0
2206	chr17	31000000	31500000	2207	-0.60308	407	3	380	2	40.2419	0.3149	54.292	0.225603
2174	chr17	15000000	15500000	2175	-0.623188	379	6	124	0	37.4734	0.629801	17.7163	0
2171	chr17	13500000	14000000	2172	-0.643438	339	1340	282	986	33.5184	140.656	40.2904	111.222
2250	chr17	53000000	53500000	2251	-0.648512	50	3	633	613	4.94372	0.3149	90.4391	69.1472
2222	chr17	39000000	39500000	2223	-0.650923	279	4	67	1	27.5859	0.419867	9.57254	0.112801
[truncated: 3,522 more rows]

## Sheet: MLL
	chr	start	end	id	E1	MLL_c1	MLL_c2	MLL_e1	MLL_e2	MLL_c1_norm	MLL_c2_norm	MLL_e1_norm	MLL_e2_norm
3	chr1	1000000	1500000	4	1.01074	11	22	569	23	2.63107	4.95513	153.295	7.04112
4	chr1	1500000	2000000	5	0.888959	268	1953	7	0	64.1025	439.88	1.88588	0
5	chr1	2000000	2500000	6	0.672528	358	56	186	681	85.6295	12.6131	50.1105	208.478
6	chr1	2500000	3000000	7	0.33123	144	490	123	37	34.4431	110.364	33.1376	11.327
7	chr1	3000000	3500000	8	0.292534	106	426	236	2	25.354	95.9493	63.5811	0.612271
8	chr1	3500000	4000000	9	0.429705	19	0	6	0	4.54458	0	1.61647	0
9	chr1	4000000	4500000	10	-0.096685	41	10	35	22	9.80673	2.25233	9.4294	6.73498
10	chr1	4500000	5000000	11	-0.169492	14	1	82	10	3.34864	0.225233	22.0917	3.06135
11	chr1	5000000	5500000	12	-0.195987	4	3	0	931	0.956754	0.6757	0	285.012
12	chr1	5500000	6000000	13	-0.0136727	117	1	3	9	27.985	0.225233	0.808234	2.75522
13	chr1	6000000	6500000	14	0.568552	175	1	43	0	41.858	0.225233	11.5847	0
14	chr1	6500000	7000000	15	0.698331	147	447	299	3	35.1607	100.679	80.554	0.918406
15	chr1	7000000	7500000	16	0.212718	103	4	180	14	24.6364	0.900933	48.4941	4.2859
16	chr1	7500000	8000000	17	0.325646	28	1989	482	0	6.69728	447.989	129.856	0
17	chr1	8000000	8500000	18	0.547157	0	1126	100	2	0	253.613	26.9411	0.612271
18	chr1	8500000	9000000	19	0.783666	298	43	290	4	71.2782	9.68503	78.1293	1.22454
19	chr1	9000000	9500000	20	0.858813	1081	0	0	0	258.563	0	0	0
20	chr1	9500000	10000000	21	0.871187	332	0	1059	0	79.4106	0	285.307	0
21	chr1	10000000	10500000	22	0.846768	1280	25	194	918	306.161	5.63083	52.2658	281.032
22	chr1	10500000	11000000	23	0.780394	238	94	34	12	56.9268	21.1719	9.15999	3.67363
23	chr1	11000000	11500000	24	0.855664	3	1315	345	23	0.717565	296.182	92.9469	7.04112
24	chr1	11500000	12000000	25	0.837503	301	7	39	159	71.9957	1.57663	10.507	48.6755
25	chr1	12000000	12500000	26	0.863261	630	663	159	8	150.689	149.33	42.8364	2.44908
26	chr1	12500000	13000000	27	0.53894	159	197	341	2	38.031	44.3709	91.8693	0.612271
29	chr1	14000000	14500000	30	0.388903	2	1611	76	1	0.478377	362.851	20.4753	0.306135
30	chr1	14500000	15000000	31	0.52086	111	61	315	147	26.5499	13.7392	84.8646	45.0019
31	chr1	15000000	15500000	32	0.370221	3	3	128	85	0.717565	0.6757	34.4847	26.0215
32	chr1	15500000	16000000	33	0.708508	426	1413	199	16	101.894	318.254	53.6129	4.89817
33	chr1	16000000	16500000	34	0.89781	221	28	647	29	52.8606	6.30653	174.309	8.87793
34	chr1	16500000	17000000	35	0.913539	563	2073	97	877	134.663	466.908	26.1329	268.481
35	chr1	17000000	17500000	36	0.799933	80	28	106	374	19.1351	6.30653	28.5576	114.495
36	chr1	17500000	18000000	37	0.474801	9	2	4	2	2.1527	0.450466	1.07765	0.612271
37	chr1	18000000	18500000	38	0.273227	8	1386	25	4	1.91351	312.173	6.73529	1.22454
38	chr1	18500000	19000000	39	0.334385	129	602	7	2	30.8553	135.59	1.88588	0.612271
39	chr1	19000000	19500000	40	0.551466	429	860	26	19	102.612	193.701	7.0047	5.81657
40	chr1	19500000	20000000	41	0.745647	635	779	691	736	151.885	175.457	186.163	225.316
41	chr1	20000000	20500000	42	0.438666	687	5	46	10	164.322	1.12617	12.3929	3.06135
42	chr1	20500000	21000000	43	0.517753	344	0	57	1	82.2808	0	15.3565	0.306135
43	chr1	21000000	21500000	44	0.762002	817	121	126	35	195.417	27.2532	33.9458	10.7147
44	chr1	21500000	22000000	45	0.642504	141	136	41	87	33.7256	30.6317	11.0459	26.6338
45	chr1	22000000	22500000	46	0.660279	5	2	105	141	1.19594	0.450466	28.2882	43.1651
46	chr1	22500000	23000000	47	0.538033	7	185	174	79	1.67432	41.6681	46.8776	24.1847
47	chr1	23000000	23500000	48	0.577669	113	0	454	0	27.0283	0	122.313	0
48	chr1	23500000	24000000	49	0.78042	438	1601	343	196	104.765	360.598	92.4081	60.0025
49	chr1	24000000	24500000	50	0.734632	1653	139	1156	59	395.378	31.3074	311.44	18.062
50	chr1	24500000	25000000	51	0.679499	142	20	208	306	33.9648	4.50466	56.0376	93.6774
51	chr1	25000000	25500000	52	0.760961	188	1	800	10	44.9674	0.225233	215.529	3.06135
52	chr1	25500000	26000000	53	0.743148	343	2	348	5	82.0416	0.450466	93.7552	1.53068
53	chr1	26000000	26500000	54	0.782583	215	1352	654	6	51.4255	304.515	176.195	1.83681
54	chr1	26500000	27000000	55	0.802569	412	727	542	13	98.5456	163.745	146.021	3.97976
55	chr1	27000000	27500000	56	0.770478	802	145	522	347	191.829	32.6588	140.633	106.229
56	chr1	27500000	28000000	57	0.762438	418	672	311	663	99.9808	151.357	83.787	202.968
57	chr1	28000000	28500000	58	0.684596	951	3	53	0	227.468	0.6757	14.2788	0
58	chr1	28500000	29000000	59	0.713653	1462	390	7	291	349.694	87.8409	1.88588	89.0854
59	chr1	29000000	29500000	60	0.587792	63	3	616	2	15.0689	0.6757	165.957	0.612271
60	chr1	29500000	30000000	61	0.392351	0	0	181	0	0	0	48.7635	0
61	chr1	30000000	30500000	62	0.263907	147	160	363	36	35.1607	36.0373	97.7963	11.0209
62	chr1	30500000	31000000	63	0.228615	282	11	19	3	67.4511	2.47757	5.11882	0.918406
63	chr1	31000000	31500000	64	0.463758	56	1	77	1081	13.3946	0.225233	20.7447	330.932
64	chr1	31500000	32000000	65	0.659847	17	772	110	30	4.0662	173.88	29.6353	9.18406
65	chr1	32000000	32500000	66	0.754872	1219	1000	493	541	291.571	225.233	132.82	165.619
66	chr1	32500000	33000000	67	0.751556	931	1	280	3310	222.684	0.225233	75.4352	1013.31
67	chr1	33000000	33500000	68	0.715244	516	582	110	5	123.421	131.086	29.6353	1.53068
68	chr1	33500000	34000000	69	0.590154	261	412	656	1	62.4282	92.7961	176.734	0.306135
69	chr1	34000000	34500000	70	0.113685	25	1	7	206	5.97971	0.225233	1.88588	63.0639
70	chr1	34500000	35000000	71	0.0502637	6	9	49	24	1.43513	2.0271	13.2012	7.34725
71	chr1	35000000	35500000	72	0.303189	87	21	12	779	20.8094	4.7299	3.23294	238.48
72	chr1	35500000	36000000	73	0.744608	2	848	221	15	0.478377	190.998	59.5399	4.59203
73	chr1	36000000	36500000	74	0.728151	741	354	492	19	177.239	79.7325	132.55	5.81657
74	chr1	36500000	37000000	75	0.723409	767	0	150	1286	183.458	0	40.4117	393.69
75	chr1	37000000	37500000	76	0.256468	349	4	40	232	83.4768	0.900933	10.7765	71.0234
76	chr1	37500000	38000000	77	0.310119	383	14	275	1656	91.6092	3.15326	74.0881	506.96
77	chr1	38000000	38500000	78	0.646171	344	10	528	37	82.2808	2.25233	142.249	11.327
78	chr1	38500000	39000000	79	0.26521	54	2	9	0	12.9162	0.450466	2.4247	0
79	chr1	39000000	39500000	80	0.390651	6	2	67	3	1.43513	0.450466	18.0506	0.918406
80	chr1	39500000	40000000	81	0.769025	583	2115	1483	5	139.447	476.368	399.537	1.53068
81	chr1	40000000	40500000	82	0.789472	339	4	588	388	81.0849	0.900933	158.414	118.781
82	chr1	40500000	41000000	83	0.848998	349	1018	585	0	83.4768	229.287	157.606	0
83	chr1	41000000	41500000	84	0.777893	196	3	711	13	46.8809	0.6757	191.552	3.97976
84	chr1	41500000	42000000	85	0.616709	0	27	64	0	0	6.0813	17.2423	0
85	chr1	42000000	42500000	86	0.690465	1254	192	176	183	299.942	43.2448	47.4164	56.0228
86	chr1	42500000	43000000	87	0.700836	1	10	367	2	0.239188	2.25233	98.874	0.612271
87	chr1	43000000	43500000	88	0.774789	702	0	678	0	167.91	0	182.661	0
88	chr1	43500000	44000000	89	0.737117	4	3	23	2	0.956754	0.6757	6.19646	0.612271
89	chr1	44000000	44500000	90	0.879665	127	0	78	0	30.3769	0	21.0141	0
90	chr1	44500000	45000000	91	0.74802	434	7	18	982	103.808	1.57663	4.84941	300.625
91	chr1	45000000	45500000	92	0.854027	37	352	320	1	8.84997	79.2821	86.2117	0.306135
92	chr1	45500000	46000000	93	0.822033	20	25	690	24	4.78377	5.63083	185.894	7.34725
93	chr1	46000000	46500000	94	0.905883	16	402	643	34	3.82702	90.5437	173.232	10.4086
94	chr1	46500000	47000000	95	0.826795	859	7	514	1692	205.463	1.57663	138.477	517.981
95	chr1	47000000	47500000	96	0.625036	43	50	39	10	10.2851	11.2617	10.507	3.06135
96	chr1	47500000	48000000	97	0.35193	2	41	11	248	0.478377	9.23456	2.96353	75.9216
97	chr1	48000000	48500000	98	-0.271945	7	4	25	13	1.67432	0.900933	6.73529	3.97976
98	chr1	48500000	49000000	99	-0.812931	64	20	7	15	15.3081	4.50466	1.88588	4.59203
99	chr1	49000000	49500000	100	-0.712376	5	68	0	0	1.19594	15.3159	0	0
100	chr1	49500000	50000000	101	-1.01696	40	2	14	20	9.56754	0.450466	3.77176	6.12271
101	chr1	50000000	50500000	102	-1.03654	16	214	12	32	3.82702	48.1999	3.23294	9.79633
102	chr1	50500000	51000000	103	-0.597251	32	1	21	312	7.65403	0.225233	5.65764	95.5143
103	chr1	51000000	51500000	104	0.0172426	22	255	249	1727	5.26215	57.4345	67.0834	528.696
104	chr1	51500000	52000000	105	0.242705	15	847	57	24	3.58783	190.773	15.3565	7.34725
105	chr1	52000000	52500000	106	0.613911	1	1	415	8	0.239188	0.225233	111.806	2.44908
106	chr1	52500000	53000000	107	0.844024	750	89	604	1738	179.391	20.0458	162.725	532.063
107	chr1	53000000	53500000	108	0.751477	452	100	21	202	108.113	22.5233	5.65764	61.8394
108	chr1	53500000	54000000	109	0.784065	342	3	577	1443	81.8024	0.6757	155.45	441.753
109	chr1	54000000	54500000	110	0.738549	132	356	491	3	31.5729	80.183	132.281	0.918406
110	chr1	54500000	55000000	111	0.824425	287	2	159	242	68.6471	0.450466	42.8364	74.0848
111	chr1	55000000	55500000	112	0.564172	69	947	10	12	16.504	213.296	2.69411	3.67363
112	chr1	55500000	56000000	113	0.138142	201	749	396	0	48.0769	168.7	106.687	0
113	chr1	56000000	56500000	114	-0.364197	613	2	77	111	146.623	0.450466	20.7447	33.981
114	chr1	56500000	57000000	115	-0.250476	162	10	13	145	38.7485	2.25233	3.50235	44.3896
115	chr1	57000000	57500000	116	-0.14896	4	6	135	130	0.956754	1.3514	36.3705	39.7976
116	chr1	57500000	58000000	117	-0.0792868	11	10	86	653	2.63107	2.25233	23.1694	199.906
117	chr1	58000000	58500000	118	-0.265173	58	131	265	2060	13.8729	29.5055	71.394	630.639
118	chr1	58500000	59000000	119	0.0524656	24	471	172	51	5.74052	106.085	46.3388	15.6129
119	chr1	59000000	59500000	120	0.412494	1260	428	43	16	301.377	96.3998	11.5847	4.89817
120	chr1	59500000	60000000	121	0.402219	124	23	80	12	29.6594	5.18036	21.5529	3.67363
121	chr1	60000000	60500000	122	-0.177963	15	442	376	501	3.58783	99.5531	101.299	153.374
122	chr1	60500000	61000000	123	-0.747674	5	892	5	2	1.19594	200.908	1.34706	0.612271
123	chr1	61000000	61500000	124	-0.514348	27	142	5	20	6.45809	31.9831	1.34706	6.12271
124	chr1	61500000	62000000	125	-0.184342	15	5	168	1	3.58783	1.12617	45.2611	0.306135
125	chr1	62000000	62500000	126	-0.21295	2	18	144	3	0.478377	4.0542	38.7952	0.918406
126	chr1	62500000	63000000	127	0.247984	544	3133	152	0	130.119	705.656	40.9505	0
127	chr1	63000000	63500000	128	-0.036866	133	6	108	312	31.8121	1.3514	29.0964	95.5143
128	chr1	63500000	64000000	129	-0.217168	3	370	22	211	0.717565	83.3363	5.92705	64.5946
129	chr1	64000000	64500000	130	-0.339808	14	16	8	24	3.34864	3.60373	2.15529	7.34725
130	chr1	64500000	65000000	131	-0.352441	2	3	9	2	0.478377	0.6757	2.4247	0.612271
131	chr1	65000000	65500000	132	-0.0200461	236	0	140	1	56.4485	0	37.7176	0.306135
132	chr1	65500000	66000000	133	-0.335581	6	6	4	0	1.43513	1.3514	1.07765	0
133	chr1	66000000	66500000	134	-0.906556	7	13	173	12	1.67432	2.92803	46.6082	3.67363
134	chr1	66500000	67000000	135	-0.688565	17	1173	13	507	4.0662	264.199	3.50235	155.211
135	chr1	67000000	67500000	136	-0.249518	468	503	3	3	111.94	113.292	0.808234	0.918406
136	chr1	67500000	68000000	137	0.0278024	6	2	1	2	1.43513	0.450466	0.269411	0.612271
137	chr1	68000000	68500000	138	-0.564579	42	100	8	3	10.0459	22.5233	2.15529	0.918406
138	chr1	68500000	69000000	139	-0.80446	376	4	505	2	89.9349	0.900933	136.053	0.612271
139	chr1	69000000	69500000	140	-0.770976	9	49	81	44	2.1527	11.0364	21.8223	13.47
140	chr1	69500000	70000000	141	-0.44628	12	791	5	23	2.87026	178.159	1.34706	7.04112
141	chr1	70000000	70500000	142	-0.716058	0	6	2	2	0	1.3514	0.538823	0.612271
142	chr1	70500000	71000000	143	-0.238287	852	600	13	1	203.789	135.14	3.50235	0.306135
143	chr1	71000000	71500000	144	-0.252942	31	24	9	2483	7.41484	5.4056	2.4247	760.134
144	chr1	71500000	72000000	145	-0.7461	17	23	210	619	4.0662	5.18036	56.5764	189.498
145	chr1	72000000	72500000	146	-0.570581	9	7	31	0	2.1527	1.57663	8.35175	0
146	chr1	72500000	73000000	147	-0.691739	4	311	128	44	0.956754	70.0475	34.4847	13.47
147	chr1	73000000	73500000	148	-0.847721	74	8	5	51	17.6999	1.80187	1.34706	15.6129
148	chr1	73500000	74000000	149	-0.884994	73	2	63	45	17.4608	0.450466	16.9729	13.7761
149	chr1	74000000	74500000	150	-0.812598	2	2	33	20	0.478377	0.450466	8.89058	6.12271
150	chr1	74500000	75000000	151	-0.848952	10	36	29	4	2.39188	8.10839	7.81293	1.22454
151	chr1	75000000	75500000	152	-0.663715	13	6	1	5	3.10945	1.3514	0.269411	1.53068
152	chr1	75500000	76000000	153	-0.685183	268	13	29	6	64.1025	2.92803	7.81293	1.83681
153	chr1	76000000	76500000	154	-0.321443	518	933	10	2	123.9	210.143	2.69411	0.612271
154	chr1	76500000	77000000	155	-0.597326	17	7	17	12	4.0662	1.57663	4.57999	3.67363
155	chr1	77000000	77500000	156	-0.736643	17	352	58	17	4.0662	79.2821	15.6259	5.2043
156	chr1	77500000	78000000	157	-0.483729	25	7	284	6	5.97971	1.57663	76.5128	1.83681
157	chr1	78000000	78500000	158	0.148951	178	8	473	4	42.5755	1.80187	127.432	1.22454
158	chr1	78500000	79000000	159	-0.650525	300	71	39	8	71.7565	15.9916	10.507	2.44908
159	chr1	79000000	79500000	160	-0.825844	1907	7	194	29	456.132	1.57663	52.2658	8.87793
160	chr1	79500000	80000000	161	-0.916681	3	4	391	10	0.717565	0.900933	105.34	3.06135
161	chr1	80000000	80500000	162	-0.921881	8	1	13	29	1.91351	0.225233	3.50235	8.87793
162	chr1	80500000	81000000	163	-0.898303	3	7	3	0	0.717565	1.57663	0.808234	0
163	chr1	81000000	81500000	164	-0.923443	16	48	338	14	3.82702	10.8112	91.0611	4.2859
164	chr1	81500000	82000000	165	-0.850672	1	2	0	0	0.239188	0.450466	0	0
165	chr1	82000000	82500000	166	-0.86204	6	278	18	2	1.43513	62.6148	4.84941	0.612271
166	chr1	82500000	83000000	167	-0.895512	76	29	161	10	18.1783	6.53176	43.3752	3.06135
167	chr1	83000000	83500000	168	-0.900183	10	14	5	4	2.39188	3.15326	1.34706	1.22454
169	chr1	84000000	84500000	170	-0.588719	5	0	0	3	1.19594	0	0	0.918406
170	chr1	84500000	85000000	171	0.0659392	197	3	16	1051	47.1201	0.6757	4.31058	321.748
171	chr1	85000000	85500000	172	-0.175809	3	10	776	6	0.717565	2.25233	209.063	1.83681
172	chr1	85500000	86000000	173	-0.366497	1	0	9	0	0.239188	0	2.4247	0
173	chr1	86000000	86500000	174	-0.71653	29	18	6	2	6.93646	4.0542	1.61647	0.612271
174	chr1	86500000	87000000	175	-0.715057	16	1074	89	21	3.82702	241.9	23.9776	6.42884
175	chr1	87000000	87500000	176	-0.279514	3	100	7	74	0.717565	22.5233	1.88588	22.654
176	chr1	87500000	88000000	177	-0.534291	64	0	9	1	15.3081	0	2.4247	0.306135
177	chr1	88000000	88500000	178	-0.894621	1	48	12	7	0.239188	10.8112	3.23294	2.14295
178	chr1	88500000	89000000	179	-0.885203	556	1	0	0	132.989	0.225233	0	0
179	chr1	89000000	89500000	180	-0.150088	23	49	6	2	5.50133	11.0364	1.61647	0.612271
180	chr1	89500000	90000000	181	0.0681549	77	10	11	4	18.4175	2.25233	2.96353	1.22454
181	chr1	90000000	90500000	182	0.259573	2	1	13	695	0.478377	0.225233	3.50235	212.764
182	chr1	90500000	91000000	183	-0.293125	238	211	16	41	56.9268	47.5242	4.31058	12.5516
183	chr1	91000000	91500000	184	0.153186	737	1	284	3	176.282	0.225233	76.5128	0.918406
184	chr1	91500000	92000000	185	-0.0195779	7	1569	36	1296	1.67432	353.391	9.69881	396.752
185	chr1	92000000	92500000	186	0.213699	7	28	377	9	1.67432	6.30653	101.568	2.75522
186	chr1	92500000	93000000	187	0.474656	445	8	41	6	106.439	1.80187	11.0459	1.83681
187	chr1	93000000	93500000	188	0.436761	14	6	322	25	3.34864	1.3514	86.7505	7.65339
188	chr1	93500000	94000000	189	0.658709	8	13	34	96	1.91351	2.92803	9.15999	29.389
189	chr1	94000000	94500000	190	0.545896	825	5	122	502	197.33	1.12617	32.8682	153.68
190	chr1	94500000	95000000	191	0.328684	8	3	308	14	1.91351	0.6757	82.9787	4.2859
191	chr1	95000000	95500000	192	-0.0671066	223	1	264	239	53.339	0.225233	71.1246	73.1664
192	chr1	95500000	96000000	193	-0.635826	2	1	3	1	0.478377	0.225233	0.808234	0.306135
193	chr1	96000000	96500000	194	-0.900546	19	16	150	1	4.54458	3.60373	40.4117	0.306135
194	chr1	96500000	97000000	195	-0.83624	51	3	22	4	12.1986	0.6757	5.92705	1.22454
195	chr1	97000000	97500000	196	-0.575714	7	15	70	45	1.67432	3.3785	18.8588	13.7761
196	chr1	97500000	98000000	197	-0.448495	39	34	14	27	9.32835	7.65793	3.77176	8.26566
197	chr1	98000000	98500000	198	-0.279466	1	8	27	0	0.239188	1.80187	7.27411	0
198	chr1	98500000	99000000	199	-0.577718	0	9	5	2	0	2.0271	1.34706	0.612271
199	chr1	99000000	99500000	200	-0.811026	57	1279	187	75	13.6337	288.073	50.3799	22.9602
200	chr1	99500000	100000000	201	-0.798763	237	1355	95	0	56.6877	305.191	25.5941	0
201	chr1	100000000	100500000	202	-0.222445	5	138	373	10	1.19594	31.0822	100.49	3.06135
202	chr1	100500000	101000000	203	0.226613	1	55	67	112	0.239188	12.3878	18.0506	34.2872
203	chr1	101000000	101500000	204	-0.124028	8	883	752	16	1.91351	198.881	202.597	4.89817
204	chr1	101500000	102000000	205	0.198543	231	1	11	655	55.2525	0.225233	2.96353	200.519
205	chr1	102000000	102500000	206	-0.686142	12	0	1	1	2.87026	0	0.269411	0.306135
206	chr1	102500000	103000000	207	-0.766336	11	4	9	2	2.63107	0.900933	2.4247	0.612271
207	chr1	103000000	103500000	208	-0.822918	0	1	1	864	0	0.225233	0.269411	264.501
210	chr1	104500000	105000000	211	-0.928592	8	8	52	3	1.91351	1.80187	14.0094	0.918406
211	chr1	105000000	105500000	212	-0.922059	14	451	433	15	3.34864	101.58	116.655	4.59203
212	chr1	105500000	106000000	213	-0.954146	1	44	314	5	0.239188	9.91026	84.5952	1.53068
213	chr1	106000000	106500000	214	-0.918377	3	4	5	24	0.717565	0.900933	1.34706	7.34725
214	chr1	106500000	107000000	215	-0.940877	5	3	4	8	1.19594	0.6757	1.07765	2.44908
215	chr1	107000000	107500000	216	-0.94837	789	1	4	4	188.72	0.225233	1.07765	1.22454
216	chr1	107500000	108000000	217	-0.754824	2	2	128	179	0.478377	0.450466	34.4847	54.7982
217	chr1	108000000	108500000	218	-0.0986405	101	163	1089	1	24.158	36.713	293.389	0.306135
218	chr1	108500000	109000000	219	0.143468	12	2	9	4	2.87026	0.450466	2.4247	1.22454
219	chr1	109000000	109500000	220	0.437449	214	3	538	769	51.1863	0.6757	144.943	235.418
220	chr1	109500000	110000000	221	0.785209	14	1678	481	1683	3.34864	377.941	129.587	515.226
221	chr1	110000000	110500000	222	0.932189	51	673	598	11	12.1986	151.582	161.108	3.36749
222	chr1	110500000	111000000	223	0.915908	0	0	353	394	0	0	95.1022	120.617
223	chr1	111000000	111500000	224	0.903358	1	53	39	100	0.239188	11.9374	10.507	30.6135
224	chr1	111500000	112000000	225	0.992261	1441	1228	426	8	344.671	276.586	114.769	2.44908
225	chr1	112000000	112500000	226	0.7754	541	19	859	1	129.401	4.27943	231.424	0.306135
226	chr1	112500000	113000000	227	0.488707	576	7	431	608	137.773	1.57663	116.116	186.13
227	chr1	113000000	113500000	228	0.738722	91	47	18	3	21.7661	10.586	4.84941	0.918406
228	chr1	113500000	114000000	229	0.606915	3	155	352	1940	0.717565	34.9111	94.8328	593.903
229	chr1	114000000	114500000	230	0.667345	487	20	173	244	116.485	4.50466	46.6082	74.697
230	chr1	114500000	115000000	231	0.680744	171	4	176	3	40.9012	0.900933	47.4164	0.918406
231	chr1	115000000	115500000	232	0.639848	169	5	234	2812	40.4228	1.12617	63.0423	860.853
232	chr1	115500000	116000000	233	0.552554	308	58	644	1	73.67	13.0635	173.501	0.306135
233	chr1	116000000	116500000	234	0.580002	319	2	224	0	76.3011	0.450466	60.3482	0
234	chr1	116500000	117000000	235	0.556664	42	16	147	9	10.0459	3.60373	39.6035	2.75522
235	chr1	117000000	117500000	236	0.772965	45	301	74	404	10.7635	67.7952	19.9364	123.679
236	chr1	117500000	118000000	237	0.417528	7	5	5	10	1.67432	1.12617	1.34706	3.06135
237	chr1	118000000	118500000	238	0.238495	150	1004	235	2	35.8783	226.134	63.3117	0.612271
238	chr1	118500000	119000000	239	-0.625201	721	10	494	38	172.455	2.25233	133.089	11.6331
239	chr1	119000000	119500000	240	-0.756918	29	87	157	4	6.93646	19.5953	42.2976	1.22454
240	chr1	119500000	120000000	241	-0.278136	6	412	450	5	1.43513	92.7961	121.235	1.53068
241	chr1	120000000	120500000	242	0.121869	185	4	14	3	44.2499	0.900933	3.77176	0.918406
243	chr1	121000000	121500000	244	0.0404594	537	25	309	65	128.444	5.63083	83.2481	19.8988
290	chr1	144500000	145000000	291	0.695667	1630	30	103	1504	389.877	6.757	27.7494	460.428
291	chr1	145000000	145500000	292	0.824198	15	1127	466	1337	3.58783	253.838	125.546	409.303
294	chr1	146500000	147000000	295	0.772925	607	35	501	27	145.187	7.88316	134.975	8.26566
295	chr1	147000000	147500000	296	0.860181	75	903	300	6	17.9391	203.386	80.8234	1.83681
299	chr1	149000000	149500000	300	-0.360481	246	9	142	7	58.8404	2.0271	38.2564	2.14295
301	chr1	150000000	150500000	302	1.05226	0	3	90	2043	0	0.6757	24.247	625.435
302	chr1	150500000	151000000	303	1.11496	1102	386	453	716	263.586	86.94	122.043	219.193
303	chr1	151000000	151500000	304	1.05376	106	1451	70	288	25.354	326.813	18.8588	88.167
304	chr1	151500000	152000000	305	0.958724	4	2054	289	13	0.956754	462.629	77.8599	3.97976
305	chr1	152000000	152500000	306	0.672169	54	102	277	41	12.9162	22.9738	74.627	12.5516
306	chr1	152500000	153000000	307	0.241229	8	14	515	754	1.91351	3.15326	138.747	230.826
307	chr1	153000000	153500000	308	0.440272	544	183	101	18	130.119	41.2177	27.2106	5.51044
308	chr1	153500000	154000000	309	0.925403	861	317	371	110	205.941	71.3989	99.9516	33.6749
309	chr1	154000000	154500000	310	0.857555	199	108	18	737	47.5985	24.3252	4.84941	225.622
310	chr1	154500000	155000000	311	0.963306	221	1393	13	1755	52.8606	313.75	3.50235	537.268
311	chr1	155000000	155500000	312	0.972472	435	80	582	161	104.047	18.0187	156.797	49.2878
312	chr1	155500000	156000000	313	0.9588	942	29	579	678	225.316	6.53176	155.989	207.56
313	chr1	156000000	156500000	314	0.970296	1029	26	356	30	246.125	5.85606	95.9105	9.18406
314	chr1	156500000	157000000	315	0.882589	356	1	807	37	85.1511	0.225233	217.415	11.327
315	chr1	157000000	157500000	316	0.378135	165	8	200	349	39.4661	1.80187	53.8823	106.841
316	chr1	157500000	158000000	317	0.299067	6	2	160	0	1.43513	0.450466	43.1058	0
317	chr1	158000000	158500000	318	0.689818	809	582	232	8	193.503	131.086	62.5035	2.44908
318	chr1	158500000	159000000	319	0.236566	479	121	9	108	114.571	27.2532	2.4247	33.0626
319	chr1	159000000	159500000	320	0.0207658	78	3	42	2	18.6567	0.6757	11.3153	0.612271
320	chr1	159500000	160000000	321	0.266062	6	951	3	6	1.43513	214.197	0.808234	1.83681
321	chr1	160000000	160500000	322	0.844109	1122	311	537	14	268.369	70.0475	144.674	4.2859
322	chr1	160500000	161000000	323	0.965509	287	1844	213	23	68.6471	415.33	57.3846	7.04112
323	chr1	161000000	161500000	324	0.902684	52	4	188	323	12.4378	0.900933	50.6493	98.8817
324	chr1	161500000	162000000	325	0.587922	0	1	35	369	0	0.225233	9.4294	112.964
325	chr1	162000000	162500000	326	0.109427	165	3	30	31	39.4661	0.6757	8.08234	9.4902
326	chr1	162500000	163000000	327	-0.0732706	8	2510	18	3	1.91351	565.335	4.84941	0.918406
327	chr1	163000000	163500000	328	-0.435327	66	3	9	4	15.7864	0.6757	2.4247	1.22454
328	chr1	163500000	164000000	329	-0.468382	9	64	107	5	2.1527	14.4149	28.827	1.53068
329	chr1	164000000	164500000	330	-0.784031	40	13	18	546	9.56754	2.92803	4.84941	167.15
330	chr1	164500000	165000000	331	-0.659664	11	12	5	2	2.63107	2.7028	1.34706	0.612271
331	chr1	165000000	165500000	332	-0.465569	18	25	6	28	4.30539	5.63083	1.61647	8.57179
332	chr1	165500000	166000000	333	0.172313	547	19	466	1	130.836	4.27943	125.546	0.306135
333	chr1	166000000	166500000	334	-0.204628	76	9	226	129	18.1783	2.0271	60.887	39.4915
334	chr1	166500000	167000000	335	-0.0689376	10	2	96	1	2.39188	0.450466	25.8635	0.306135
335	chr1	167000000	167500000	336	0.47379	38	14	362	5	9.08916	3.15326	97.5269	1.53068
336	chr1	167500000	168000000	337	0.622065	339	2	91	43	81.0849	0.450466	24.5164	13.1638
337	chr1	168000000	168500000	338	0.57083	33	0	576	8	7.89322	0	155.181	2.44908
338	chr1	168500000	169000000	339	0.123508	218	10	183	34	52.1431	2.25233	49.3023	10.4086
339	chr1	169000000	169500000	340	0.294908	9	17	19	13	2.1527	3.82896	5.11882	3.97976
340	chr1	169500000	170000000	341	0.470069	1	245	185	22	0.239188	55.1821	49.8411	6.73498
341	chr1	170000000	170500000	342	0.225962	14	2409	17	16	3.34864	542.587	4.57999	4.89817
342	chr1	170500000	171000000	343	-0.09611	575	1148	16	4	137.533	258.568	4.31058	1.22454
343	chr1	171000000	171500000	344	-0.0254627	188	51	255	18	44.9674	11.4869	68.6999	5.51044
344	chr1	171500000	172000000	345	0.399163	729	266	573	400	174.368	59.912	154.373	122.454
345	chr1	172000000	172500000	346	0.35164	572	46	837	1	136.816	10.3607	225.497	0.306135
346	chr1	172500000	173000000	347	0.450465	522	6	627	11	124.856	1.3514	168.921	3.36749
347	chr1	173000000	173500000	348	0.271555	5	2556	1161	0	1.19594	575.696	312.787	0
348	chr1	173500000	174000000	349	0.376004	9	27	323	279	2.1527	6.0813	87.0199	85.4118
349	chr1	174000000	174500000	350	0.175134	42	881	0	387	10.0459	198.43	0	118.474
350	chr1	174500000	175000000	351	0.0612322	18	51	424	1744	4.30539	11.4869	114.23	533.9
351	chr1	175000000	175500000	352	-0.0683745	5	22	66	7	1.19594	4.95513	17.7812	2.14295
352	chr1	175500000	176000000	353	-0.316693	63	36	127	6	15.0689	8.10839	34.2153	1.83681
353	chr1	176000000	176500000	354	-0.428405	12	2	163	9	2.87026	0.450466	43.9141	2.75522
354	chr1	176500000	177000000	355	-0.728404	3	0	1	11	0.717565	0	0.269411	3.36749
355	chr1	177000000	177500000	356	-0.727653	4	265	298	8	0.956754	59.6868	80.2846	2.44908
356	chr1	177500000	178000000	357	-0.515826	20	19	26	18	4.78377	4.27943	7.0047	5.51044
357	chr1	178000000	178500000	358	-0.543893	15	185	16	9	3.58783	41.6681	4.31058	2.75522
358	chr1	178500000	179000000	359	0.0112379	96	101	610	56	22.9621	22.7486	164.341	17.1436
359	chr1	179000000	179500000	360	0.238505	89	91	235	125	21.2878	20.4962	63.3117	38.2669
360	chr1	179500000	180000000	361	0.238404	38	1152	92	635	9.08916	259.469	24.7859	194.396
361	chr1	180000000	180500000	362	0.467846	428	1056	19	1239	102.373	237.846	5.11882	379.302
362	chr1	180500000	181000000	363	0.49084	5	504	47	4	1.19594	113.518	12.6623	1.22454
363	chr1	181000000	181500000	364	0.244677	107	17	280	614	25.5932	3.82896	75.4352	187.967
364	chr1	181500000	182000000	365	-0.119073	17	899	658	5	4.0662	202.485	177.273	1.53068
365	chr1	182000000	182500000	366	0.459432	23	17	618	10	5.50133	3.82896	166.496	3.06135
366	chr1	182500000	183000000	367	0.198396	163	46	156	238	38.9877	10.3607	42.0282	72.8602
367	chr1	183000000	183500000	368	0.140392	48	1213	29	328	11.481	273.208	7.81293	100.412
368	chr1	183500000	184000000	369	0.10779	11	8	5	4	2.63107	1.80187	1.34706	1.22454
369	chr1	184000000	184500000	370	-0.237011	4	5	59	15	0.956754	1.12617	15.8953	4.59203
370	chr1	184500000	185000000	371	-0.323456	121	5	58	94	28.9418	1.12617	15.6259	28.7767
371	chr1	185000000	185500000	372	-0.311764	622	19	8	476	148.775	4.27943	2.15529	145.72
372	chr1	185500000	186000000	373	-0.765834	51	7	28	4	12.1986	1.57663	7.54352	1.22454
373	chr1	186000000	186500000	374	-0.638781	11	1574	73	2	2.63107	354.517	19.667	0.612271
374	chr1	186500000	187000000	375	-0.875497	6	28	9	1	1.43513	6.30653	2.4247	0.306135
375	chr1	187000000	187500000	376	-0.858051	255	2	158	9	60.9931	0.450466	42.567	2.75522
376	chr1	187500000	188000000	377	-1.0233	4	9	257	16	0.956754	2.0271	69.2387	4.89817
377	chr1	188000000	188500000	378	-1.01136	7	1	3	9	1.67432	0.225233	0.808234	2.75522
378	chr1	188500000	189000000	379	-0.983683	4	338	21	0	0.956754	76.1288	5.65764	0
379	chr1	189000000	189500000	380	-0.968979	8	0	0	3	1.91351	0	0	0.918406
380	chr1	189500000	190000000	381	-1.00501	229	86	4	1	54.7742	19.3701	1.07765	0.306135
381	chr1	190000000	190500000	382	-0.976351	263	42	4	5	62.9066	9.45979	1.07765	1.53068
382	chr1	190500000	191000000	383	-0.98411	166	4	751	667	39.7053	0.900933	202.328	204.192
383	chr1	191000000	191500000	384	-1.00264	1	14	62	2	0.239188	3.15326	16.7035	0.612271
384	chr1	191500000	192000000	385	-0.992222	1	0	345	0	0.239188	0	92.9469	0
385	chr1	192000000	192500000	386	-0.876289	4	4	3	2	0.956754	0.900933	0.808234	0.612271
386	chr1	192500000	193000000	387	-0.7044	2	2	3	2	0.478377	0.450466	0.808234	0.612271
387	chr1	193000000	193500000	388	-0.370612	3	13	549	2	0.717565	2.92803	147.907	0.612271
388	chr1	193500000	194000000	389	-0.747699	23	1	206	8	5.50133	0.225233	55.4988	2.44908
389	chr1	194000000	194500000	390	-0.546398	19	45	222	8	4.54458	10.1355	59.8093	2.44908
390	chr1	194500000	195000000	391	-0.592228	99	2	212	3	23.6797	0.450466	57.1152	0.918406
391	chr1	195000000	195500000	392	-0.57493	15	149	273	4	3.58783	33.5597	73.5493	1.22454
392	chr1	195500000	196000000	393	-0.807115	53	13	35	26	12.677	2.92803	9.4294	7.95952
393	chr1	196000000	196500000	394	-1.02995	9	2	116	2	2.1527	0.450466	31.2517	0.612271
394	chr1	196500000	197000000	395	-1.03544	2	951	115	1	0.478377	214.197	30.9823	0.306135
395	chr1	197000000	197500000	396	-0.648995	0	0	8	19	0	0	2.15529	5.81657
396	chr1	197500000	198000000	397	-0.222762	32	59	33	1585	7.65403	13.2888	8.89058	485.225
397	chr1	198000000	198500000	398	-0.0557851	12	828	358	5	2.87026	186.493	96.4493	1.53068
398	chr1	198500000	199000000	399	-0.116145	388	47	14	2	92.8051	10.586	3.77176	0.612271
399	chr1	199000000	199500000	400	-0.263208	62	1	114	4	14.8297	0.225233	30.7129	1.22454
400	chr1	199500000	200000000	401	-0.555257	131	1	183	230	31.3337	0.225233	49.3023	70.4112
401	chr1	200000000	200500000	402	-0.208336	0	81	220	42	0	18.2439	59.2705	12.8577
402	chr1	200500000	201000000	403	0.480831	8	13	565	0	1.91351	2.92803	152.217	0
403	chr1	201000000	201500000	404	0.636927	0	133	390	1	0	29.956	105.07	0.306135
404	chr1	201500000	202000000	405	0.778828	4	2	491	3	0.956754	0.450466	132.281	0.918406
405	chr1	202000000	202500000	406	0.840598	410	198	563	481	98.0673	44.5962	151.679	147.251
406	chr1	202500000	203000000	407	0.940666	715	497	293	541	171.02	111.941	78.9375	165.619
407	chr1	203000000	203500000	408	0.84197	101	4	495	6	24.158	0.900933	133.359	1.83681
408	chr1	203500000	204000000	409	0.980598	328	13	237	65	78.4538	2.92803	63.8505	19.8988
409	chr1	204000000	204500000	410	0.94055	2	0	635	1	0.478377	0	171.076	0.306135
410	chr1	204500000	205000000	411	0.87037	425	1332	67	0	101.655	300.011	18.0506	0
411	chr1	205000000	205500000	412	0.939876	295	0	367	7	70.5606	0	98.874	2.14295
412	chr1	205500000	206000000	413	0.975915	229	0	280	0	54.7742	0	75.4352	0
414	chr1	206500000	207000000	415	0.938409	4	2071	191	483	0.956754	466.458	51.4576	147.863
415	chr1	207000000	207500000	416	0.650067	1	2094	10	0	0.239188	471.638	2.69411	0
416	chr1	207500000	208000000	417	0.537516	281	3	455	947	67.212	0.6757	122.582	289.91
417	chr1	208000000	208500000	418	0.123443	331	3	140	4	79.1714	0.6757	37.7176	1.22454
418	chr1	208500000	209000000	419	-0.431164	5	13	10	8	1.19594	2.92803	2.69411	2.44908
419	chr1	209000000	209500000	420	-0.417263	3	6	2	0	0.717565	1.3514	0.538823	0
420	chr1	209500000	210000000	421	-0.0884901	199	73	9	760	47.5985	16.442	2.4247	232.663
421	chr1	210000000	210500000	422	-0.241307	21	466	371	5	5.02296	104.959	99.9516	1.53068
422	chr1	210500000	211000000	423	-0.0624759	114	4	109	25	27.2675	0.900933	29.3658	7.65339
423	chr1	211000000	211500000	424	-0.0498482	760	15	153	12	181.783	3.3785	41.2199	3.67363
424	chr1	211500000	212000000	425	0.400967	2	411	362	3	0.478377	92.5708	97.5269	0.918406
425	chr1	212000000	212500000	426	0.464677	72	1	277	1762	17.2216	0.225233	74.627	539.411
426	chr1	212500000	213000000	427	0.580539	1	1734	97	2	0.239188	390.554	26.1329	0.612271
427	chr1	213000000	213500000	428	0.200474	12	18	152	2	2.87026	4.0542	40.9505	0.612271
428	chr1	213500000	214000000	429	-0.148059	198	10	18	15	47.3593	2.25233	4.84941	4.59203
429	chr1	214000000	214500000	430	-0.178136	1	6	183	1	0.239188	1.3514	49.3023	0.306135
430	chr1	214500000	215000000	431	-0.537443	3	2	148	4	0.717565	0.450466	39.8729	1.22454
431	chr1	215000000	215500000	432	-1.02358	2	17	39	4	0.478377	3.82896	10.507	1.22454
432	chr1	215500000	216000000	433	-0.86489	3	519	12	13	0.717565	116.896	3.23294	3.97976
433	chr1	216000000	216500000	434	-1.00801	22	4	12	9	5.26215	0.900933	3.23294	2.75522
434	chr1	216500000	217000000	435	-0.977233	44	947	15	0	10.5243	213.296	4.04117	0
435	chr1	217000000	217500000	436	-0.958888	5	41	4	5	1.19594	9.23456	1.07765	1.53068
436	chr1	217500000	218000000	437	-0.834461	80	2	59	6	19.1351	0.450466	15.8953	1.83681
437	chr1	218000000	218500000	438	-0.846878	15	30	33	24	3.58783	6.757	8.89058	7.34725
438	chr1	218500000	219000000	439	-0.682677	4	6	306	101	0.956754	1.3514	82.4399	30.9197
439	chr1	219000000	219500000	440	-0.924733	14	353	14	7	3.34864	79.5073	3.77176	2.14295
440	chr1	219500000	220000000	441	-0.881481	237	1546	25	4	56.6877	348.211	6.73529	1.22454
441	chr1	220000000	220500000	442	-0.260435	275	428	7	7	65.7768	96.3998	1.88588	2.14295
442	chr1	220500000	221000000	443	-0.730115	2	566	97	4	0.478377	127.482	26.1329	1.22454
443	chr1	221000000	221500000	444	-0.776542	1	6	3	2	0.239188	1.3514	0.808234	0.612271
444	chr1	221500000	222000000	445	-0.314596	8	0	8	10	1.91351	0	2.15529	3.06135
445	chr1	222000000	222500000	446	-0.422805	299	2	2	0	71.5173	0.450466	0.538823	0
446	chr1	222500000	223000000	447	0.0473129	160	238	16	2	38.2702	53.6055	4.31058	0.612271
447	chr1	223000000	223500000	448	0.398112	184	13	20	38	44.0107	2.92803	5.38823	11.6331
448	chr1	223500000	224000000	449	0.420227	242	1177	125	56	57.8836	265.099	33.6764	17.1436
449	chr1	224000000	224500000	450	0.598227	44	804	158	7	10.5243	181.087	42.567	2.14295
450	chr1	224500000	225000000	451	0.355404	3	2719	298	24	0.717565	612.409	80.2846	7.34725
451	chr1	225000000	225500000	452	0.0827213	7	85	15	0	1.67432	19.1448	4.04117	0
452	chr1	225500000	226000000	453	0.706098	126	2020	23	0	30.1377	454.971	6.19646	0
453	chr1	226000000	226500000	454	0.958124	496	0	335	0	118.637	0	90.2528	0
454	chr1	226500000	227000000	455	0.937108	60	6	184	172	14.3513	1.3514	49.5717	52.6553
455	chr1	227000000	227500000	456	0.805577	8	1	548	2	1.91351	0.225233	147.637	0.612271
456	chr1	227500000	228000000	457	0.725152	455	15	118	452	108.831	3.3785	31.7905	138.373
457	chr1	228000000	228500000	458	1.0175	91	2	129	53	21.7661	0.450466	34.7541	16.2252
458	chr1	228500000	229000000	459	1.0221	60	8	527	8	14.3513	1.80187	141.98	2.44908
459	chr1	229000000	229500000	460	1.04671	768	0	1066	1390	183.697	0	287.193	425.528
460	chr1	229500000	230000000	461	0.931679	2109	705	87	2	504.448	158.789	23.4388	0.612271
461	chr1	230000000	230500000	462	0.952183	239	21	613	456	57.166	4.7299	165.149	139.598
462	chr1	230500000	231000000	463	0.762377	506	1220	505	1906	121.029	274.784	136.053	583.494
463	chr1	231000000	231500000	464	0.86446	54	29	22	0	12.9162	6.53176	5.92705	0
464	chr1	231500000	232000000	465	0.714665	27	0	444	1	6.45809	0	119.619	0.306135
465	chr1	232000000	232500000	466	0.627504	10	1959	15	1	2.39188	441.232	4.04117	0.306135
466	chr1	232500000	233000000	467	0.786825	479	8	403	647	114.571	1.80187	108.573	198.07
467	chr1	233000000	233500000	468	0.669726	0	3293	9	1	0	741.693	2.4247	0.306135
468	chr1	233500000	234000000	469	0.463092	73	811	23	190	17.4608	182.664	6.19646	58.1657
469	chr1	234000000	234500000	470	0.470932	334	907	173	61	79.8889	204.287	46.6082	18.6743
470	chr1	234500000	235000000	471	1.01982	384	7	296	10	91.8484	1.57663	79.7458	3.06135
471	chr1	235000000	235500000	472	0.829788	194	3	442	88	46.4026	0.6757	119.08	26.9399
472	chr1	235500000	236000000	473	0.553208	937	95	211	1	224.12	21.3972	56.8458	0.306135
473	chr1	236000000	236500000	474	0.124661	237	298	1	45	56.6877	67.1195	0.269411	13.7761
474	chr1	236500000	237000000	475	-0.198975	0	0	333	0	0	0	89.714	0
475	chr1	237000000	237500000	476	-0.753263	22	57	121	411	5.26215	12.8383	32.5988	125.822
476	chr1	237500000	238000000	477	-0.968846	2	4	2	3	0.478377	0.900933	0.538823	0.918406
477	chr1	238000000	238500000	478	-1.06083	90	8	3	1	21.527	1.80187	0.808234	0.306135
478	chr1	238500000	239000000	479	-1.17149	3	2	46	2	0.717565	0.450466	12.3929	0.612271
479	chr1	239000000	239500000	480	-1.12333	6	6	6	3	1.43513	1.3514	1.61647	0.918406
480	chr1	239500000	240000000	481	-0.941066	9	105	157	3	2.1527	23.6495	42.2976	0.918406
481	chr1	240000000	240500000	482	-0.935906	0	2	12	1	0	0.450466	3.23294	0.306135
482	chr1	240500000	241000000	483	-0.996262	0	2	407	0	0	0.450466	109.65	0
483	chr1	241000000	241500000	484	-1.01563	3	0	10	1801	0.717565	0	2.69411	551.35
484	chr1	241500000	242000000	485	-0.568471	331	14	1	0	79.1714	3.15326	0.269411	0
485	chr1	242000000	242500000	486	-0.708776	10	3	4	5	2.39188	0.6757	1.07765	1.53068
486	chr1	242500000	243000000	487	-0.951346	7	3	3	4	1.67432	0.6757	0.808234	1.22454
487	chr1	243000000	243500000	488	-0.404838	47	24	108	4	11.2419	5.4056	29.0964	1.22454
488	chr1	243500000	244000000	489	-0.0604112	3	5	173	7	0.717565	1.12617	46.6082	2.14295
489	chr1	244000000	244500000	490	-0.221746	0	0	105	1	0	0	28.2882	0.306135
490	chr1	244500000	245000000	491	0.0699165	6	27	172	1	1.43513	6.0813	46.3388	0.306135
491	chr1	245000000	245500000	492	0.191209	26	7	82	1	6.2189	1.57663	22.0917	0.306135
492	chr1	245500000	246000000	493	-0.199966	5	7	34	573	1.19594	1.57663	9.15999	175.416
493	chr1	246000000	246500000	494	-0.183264	108	3	5	12	25.8324	0.6757	1.34706	3.67363
494	chr1	246500000	247000000	495	0.280739	263	2	29	451	62.9066	0.450466	7.81293	138.067
495	chr1	247000000	247500000	496	-0.0490705	4	1	434	482	0.956754	0.225233	116.925	147.557
496	chr1	247500000	248000000	497	-1.25401	79	109	66	29	18.8959	24.5504	17.7812	8.87793
497	chr1	248000000	248500000	498	-1.46878	12	21	58	5	2.87026	4.7299	15.6259	1.53068
500	chr10	0	500000	501	0.135412	395	155	13	1	94.4794	34.9111	3.50235	0.306135
501	chr10	500000	1000000	502	0.27857	3	9	137	187	0.717565	2.0271	36.9094	57.2473
502	chr10	1000000	1500000	503	0.365268	8	4	226	1	1.91351	0.900933	60.887	0.306135
503	chr10	1500000	2000000	504	-0.312519	82	3	3	3	19.6135	0.6757	0.808234	0.918406
504	chr10	2000000	2500000	505	-0.440021	228	0	1	0	54.535	0	0.269411	0
505	chr10	2500000	3000000	506	0.191994	255	895	16	0	60.9931	201.584	4.31058	0
506	chr10	3000000	3500000	507	0.0240273	463	1450	32	53	110.744	326.588	8.62117	16.2252
507	chr10	3500000	4000000	508	-0.291265	129	0	0	0	30.8553	0	0	0
508	chr10	4000000	4500000	509	-0.73081	121	0	9	1	28.9418	0	2.4247	0.306135
509	chr10	4500000	5000000	510	-0.4759	440	2	50	2	105.243	0.450466	13.4706	0.612271
510	chr10	5000000	5500000	511	-0.124125	313	25	81	1470	74.866	5.63083	21.8223	450.019
511	chr10	5500000	6000000	512	0.53418	134	131	39	2	32.0513	29.5055	10.507	0.612271
512	chr10	6000000	6500000	513	0.68006	6	6	31	25	1.43513	1.3514	8.35175	7.65339
513	chr10	6500000	7000000	514	0.575576	0	177	35	40	0	39.8663	9.4294	12.2454
514	chr10	7000000	7500000	515	0.460954	7	837	151	367	1.67432	188.52	40.6811	112.352
515	chr10	7500000	8000000	516	0.298476	42	3	8	1444	10.0459	0.6757	2.15529	442.06
516	chr10	8000000	8500000	517	0.568326	14	1	52	6	3.34864	0.225233	14.0094	1.83681
517	chr10	8500000	9000000	518	-0.188411	9	1	71	5	2.1527	0.225233	19.1282	1.53068
518	chr10	9000000	9500000	519	-0.268003	3	2	112	2	0.717565	0.450466	30.1741	0.612271
519	chr10	9500000	10000000	520	-0.755849	10	9	27	4	2.39188	2.0271	7.27411	1.22454
520	chr10	10000000	10500000	521	-0.78653	6	7	3	1	1.43513	1.57663	0.808234	0.306135
521	chr10	10500000	11000000	522	-0.458581	11	347	7	3	2.63107	78.1559	1.88588	0.918406
522	chr10	11000000	11500000	523	0.225453	1	14	341	3	0.239188	3.15326	91.8693	0.918406
523	chr10	11500000	12000000	524	0.603612	1933	0	303	4	462.351	0	81.6317	1.22454
524	chr10	12000000	12500000	525	0.813712	541	4	223	74	129.401	0.900933	60.0787	22.654
525	chr10	12500000	13000000	526	0.678135	219	0	444	1	52.3823	0	119.619	0.306135
526	chr10	13000000	13500000	527	0.59526	76	1	6	1252	18.1783	0.225233	1.61647	383.282
527	chr10	13500000	14000000	528	0.434317	77	308	17	108	18.4175	69.3718	4.57999	33.0626
528	chr10	14000000	14500000	529	-0.0408293	102	0	0	0	24.3972	0	0	0
529	chr10	14500000	15000000	530	0.402925	723	4	339	0	172.933	0.900933	91.3305	0
530	chr10	15000000	15500000	531	0.260853	1	1076	72	9	0.239188	242.351	19.3976	2.75522
531	chr10	15500000	16000000	532	-0.353665	7	7	155	3	1.67432	1.57663	41.7588	0.918406
532	chr10	16000000	16500000	533	-0.551458	342	3	17	7	81.8024	0.6757	4.57999	2.14295
533	chr10	16500000	17000000	534	0.0588171	1	1291	283	4	0.239188	290.776	76.2434	1.22454
534	chr10	17000000	17500000	535	0.443899	1	172	159	2	0.239188	38.7401	42.8364	0.612271
535	chr10	17500000	18000000	536	0.580598	2	5	578	7	0.478377	1.12617	155.72	2.14295
536	chr10	18000000	18500000	537	-0.251062	4	4	2	1546	0.956754	0.900933	0.538823	473.285
537	chr10	18500000	19000000	538	-0.232645	511	1	130	4	122.225	0.225233	35.0235	1.22454
538	chr10	19000000	19500000	539	-0.835338	14	1	12	5	3.34864	0.225233	3.23294	1.53068
539	chr10	19500000	20000000	540	-0.956903	6	2	10	1686	1.43513	0.450466	2.69411	516.144
540	chr10	20000000	20500000	541	-0.896532	263	246	19	0	62.9066	55.4074	5.11882	0
541	chr10	20500000	21000000	542	-0.908251	37	10	400	27	8.84997	2.25233	107.765	8.26566
542	chr10	21000000	21500000	543	-0.564998	1	44	2	2	0.239188	9.91026	0.538823	0.612271
543	chr10	21500000	22000000	544	0.231861	1	18	1	1409	0.239188	4.0542	0.269411	431.345
544	chr10	22000000	22500000	545	0.0774817	167	22	29	22	39.9445	4.95513	7.81293	6.73498
545	chr10	22500000	23000000	546	0.192878	532	732	302	711	127.248	164.871	81.3623	217.662
546	chr10	23000000	23500000	547	-0.015222	11	12	62	5	2.63107	2.7028	16.7035	1.53068
547	chr10	23500000	24000000	548	-0.462988	516	101	160	14	123.421	22.7486	43.1058	4.2859
548	chr10	24000000	24500000	549	-0.795707	8	4	146	15	1.91351	0.900933	39.3341	4.59203
549	chr10	24500000	25000000	550	-0.268769	0	0	369	3374	0	0	99.4128	1032.9
550	chr10	25000000	25500000	551	-0.0692834	485	5	82	128	116.006	1.12617	22.0917	39.1853
551	chr10	25500000	26000000	552	-0.804532	101	0	177	3	24.158	0	47.6858	0.918406
552	chr10	26000000	26500000	553	-0.582363	13	1874	10	12	3.10945	422.087	2.69411	3.67363
553	chr10	26500000	27000000	554	0.277103	7	0	12	2099	1.67432	0	3.23294	642.578
554	chr10	27000000	27500000	555	0.512419	7	1799	83	5	1.67432	405.195	22.3611	1.53068
555	chr10	27500000	28000000	556	-0.00498323	36	14	91	4	8.61078	3.15326	24.5164	1.22454
556	chr10	28000000	28500000	557	-0.536666	407	64	297	218	97.3497	14.4149	80.0152	66.7375
557	chr10	28500000	29000000	558	0.0171186	0	1	8	2	0	0.225233	2.15529	0.612271
558	chr10	29000000	29500000	559	-0.373875	94	0	423	18	22.4837	0	113.961	5.51044
559	chr10	29500000	30000000	560	0.208532	2	18	323	295	0.478377	4.0542	87.0199	90.31
560	chr10	30000000	30500000	561	0.165902	64	17	246	3	15.3081	3.82896	66.2752	0.918406
561	chr10	30500000	31000000	562	0.510166	349	6	666	7	83.4768	1.3514	179.428	2.14295
562	chr10	31000000	31500000	563	0.593338	0	1308	14	1534	0	294.605	3.77176	469.612
563	chr10	31500000	32000000	564	0.419862	18	12	309	24	4.30539	2.7028	83.2481	7.34725
564	chr10	32000000	32500000	565	0.605704	11	2	426	0	2.63107	0.450466	114.769	0
565	chr10	32500000	33000000	566	0.667681	484	79	40	10	115.767	17.7934	10.7765	3.06135
566	chr10	33000000	33500000	567	0.560481	387	23	24	8	92.5659	5.18036	6.46587	2.44908
567	chr10	33500000	34000000	568	-0.0931423	9	2	38	918	2.1527	0.450466	10.2376	281.032
568	chr10	34000000	34500000	569	0.0247877	39	96	404	3	9.32835	21.6224	108.842	0.918406
569	chr10	34500000	35000000	570	0.347563	0	0	70	2	0	0	18.8588	0.612271
570	chr10	35000000	35500000	571	0.506875	0	0	109	5	0	0	29.3658	1.53068
571	chr10	35500000	36000000	572	0.0940781	5	8	548	7	1.19594	1.80187	147.637	2.14295
572	chr10	36000000	36500000	573	-0.780698	503	8	6	11	120.312	1.80187	1.61647	3.36749
573	chr10	36500000	37000000	574	-0.983204	1	1	2	179	0.239188	0.225233	0.538823	54.7982
574	chr10	37000000	37500000	575	-0.761715	159	4	1	2	38.031	0.900933	0.269411	0.612271
575	chr10	37500000	38000000	576	-0.638953	43	4	280	2	10.2851	0.900933	75.4352	0.612271
576	chr10	38000000	38500000	577	0.0210828	23	177	145	2	5.50133	39.8663	39.0647	0.612271
584	chr10	42000000	42500000	585	0.240486	6	2	111	4	1.43513	0.450466	29.9047	1.22454
586	chr10	43000000	43500000	587	-0.289587	13	1214	163	0	3.10945	273.433	43.9141	0
587	chr10	43500000	44000000	588	0.143427	216	0	4	31	51.6647	0	1.07765	9.4902
588	chr10	44000000	44500000	589	-0.16818	237	9	8	10	56.6877	2.0271	2.15529	3.06135
589	chr10	44500000	45000000	590	-0.439643	948	14	184	211	226.751	3.15326	49.5717	64.5946
590	chr10	45000000	45500000	591	0.357277	376	4	4	2	89.9349	0.900933	1.07765	0.612271
591	chr10	45500000	46000000	592	0.258185	5	221	21	10	1.19594	49.7765	5.65764	3.06135
594	chr10	47000000	47500000	595	0.193928	13	0	268	288	3.10945	0	72.2023	88.167
599	chr10	49500000	50000000	600	0.00159069	2	1	165	1	0.478377	0.225233	44.4529	0.306135
600	chr10	50000000	50500000	601	-0.123008	7	1	505	3	1.67432	0.225233	136.053	0.918406
601	chr10	50500000	51000000	602	0.390467	472	863	353	0	112.897	194.376	95.1022	0
604	chr10	52000000	52500000	605	-0.0482422	20	18	44	11	4.78377	4.0542	11.8541	3.36749
605	chr10	52500000	53000000	606	-1.12622	276	7	41	3	66.016	1.57663	11.0459	0.918406
606	chr10	53000000	53500000	607	-1.14724	4	1	6	11	0.956754	0.225233	1.61647	3.36749
607	chr10	53500000	54000000	608	-1.13672	148	7	114	5	35.3999	1.57663	30.7129	1.53068
608	chr10	54000000	54500000	609	-1.07954	1	946	23	24	0.239188	213.071	6.19646	7.34725
609	chr10	54500000	55000000	610	-0.965823	3	16	33	4	0.717565	3.60373	8.89058	1.22454
610	chr10	55000000	55500000	611	-1.0784	51	312	13	17	12.1986	70.2728	3.50235	5.2043
611	chr10	55500000	56000000	612	-1.01999	5	2121	11	9	1.19594	477.72	2.96353	2.75522
612	chr10	56000000	56500000	613	-1.04549	47	223	319	7	11.2419	50.227	85.9422	2.14295
613	chr10	56500000	57000000	614	-0.974066	2	6	1	0	0.478377	1.3514	0.269411	0
614	chr10	57000000	57500000	615	-0.95243	9	2	81	4	2.1527	0.450466	21.8223	1.22454
615	chr10	57500000	58000000	616	-0.982532	149	11	4	1	35.6391	2.47757	1.07765	0.306135
616	chr10	58000000	58500000	617	-0.941401	3	135	333	8	0.717565	30.4065	89.714	2.44908
617	chr10	58500000	59000000	618	-1.07809	2	3	0	1	0.478377	0.6757	0	0.306135
618	chr10	59000000	59500000	619	-1.04157	170	3	22	3	40.662	0.6757	5.92705	0.918406
619	chr10	59500000	60000000	620	-0.871632	166	340	3	46	39.7053	76.5793	0.808234	14.0822
620	chr10	60000000	60500000	621	-0.541091	275	3	222	299	65.7768	0.6757	59.8093	91.5345
621	chr10	60500000	61000000	622	-0.975738	105	104	293	3	25.1148	23.4243	78.9375	0.918406
622	chr10	61000000	61500000	623	-0.833655	405	21	1	1	96.8713	4.7299	0.269411	0.306135
623	chr10	61500000	62000000	624	-0.522769	10	19	19	20	2.39188	4.27943	5.11882	6.12271
624	chr10	62000000	62500000	625	-0.924562	6	5	8	6	1.43513	1.12617	2.15529	1.83681
625	chr10	62500000	63000000	626	-0.386988	306	195	104	30	73.1917	43.9205	28.0188	9.18406
626	chr10	63000000	63500000	627	-0.0830787	7	1	89	7	1.67432	0.225233	23.9776	2.14295
627	chr10	63500000	64000000	628	0.301494	379	3037	326	355	90.6524	684.033	87.8281	108.678
628	chr10	64000000	64500000	629	-0.292679	299	2	60	6	71.5173	0.450466	16.1647	1.83681
629	chr10	64500000	65000000	630	-0.274884	315	1	5	241	75.3444	0.225233	1.34706	73.7786
630	chr10	65000000	65500000	631	0.246247	25	1	25	2	5.97971	0.225233	6.73529	0.612271
631	chr10	65500000	66000000	632	-0.746693	85	26	17	9	20.331	5.85606	4.57999	2.75522
632	chr10	66000000	66500000	633	-1.0757	0	0	1	2	0	0	0.269411	0.612271
633	chr10	66500000	67000000	634	-1.08475	14	5	5	7	3.34864	1.12617	1.34706	2.14295
634	chr10	67000000	67500000	635	-1.14482	1	3	4	2	0.239188	0.6757	1.07765	0.612271
635	chr10	67500000	68000000	636	-1.04918	65	4	4	1	15.5472	0.900933	1.07765	0.306135
636	chr10	68000000	68500000	637	-1.11674	10	6	12	21	2.39188	1.3514	3.23294	6.42884
637	chr10	68500000	69000000	638	-1.09073	213	1192	4	9	50.9471	268.478	1.07765	2.75522
638	chr10	69000000	69500000	639	-0.818973	443	12	200	23	105.96	2.7028	53.8823	7.04112
639	chr10	69500000	70000000	640	0.241074	17	2	5	1	4.0662	0.450466	1.34706	0.306135
640	chr10	70000000	70500000	641	0.620706	437	1	167	13	104.525	0.225233	44.9917	3.97976
641	chr10	70500000	71000000	642	0.705138	706	667	292	2316	168.867	150.231	78.6681	709.01
642	chr10	71000000	71500000	643	0.6365	1132	498	316	3	270.761	112.166	85.134	0.918406
643	chr10	71500000	72000000	644	0.619678	4	0	711	4	0.956754	0	191.552	1.22454
644	chr10	72000000	72500000	645	0.593623	102	2013	23	3	24.3972	453.394	6.19646	0.918406
645	chr10	72500000	73000000	646	0.407783	343	0	95	1	82.0416	0	25.5941	0.306135
646	chr10	73000000	73500000	647	0.526637	108	2	153	11	25.8324	0.450466	41.2199	3.36749
647	chr10	73500000	74000000	648	0.667952	325	988	471	1317	77.7362	222.53	126.893	403.18
648	chr10	74000000	74500000	649	0.635922	186	4	841	576	44.4891	0.900933	226.575	176.334
649	chr10	74500000	75000000	650	0.601206	206	5	720	23	49.2728	1.12617	193.976	7.04112
650	chr10	75000000	75500000	651	0.667944	733	1154	668	397	175.325	259.919	179.967	121.536
651	chr10	75500000	76000000	652	0.664438	2432	32	892	691	581.706	7.20746	240.315	211.54
652	chr10	76000000	76500000	653	0.536548	0	12	248	0	0	2.7028	66.814	0
653	chr10	76500000	77000000	654	0.583882	405	7	325	10	96.8713	1.57663	87.5587	3.06135
654	chr10	77000000	77500000	655	-0.185819	148	36	81	200	35.3999	8.10839	21.8223	61.2271
655	chr10	77500000	78000000	656	-0.595079	319	6	3	3	76.3011	1.3514	0.808234	0.918406
656	chr10	78000000	78500000	657	-0.787136	9	34	9	4	2.1527	7.65793	2.4247	1.22454
657	chr10	78500000	79000000	658	-0.34676	137	1	2	5	32.7688	0.225233	0.538823	1.53068
658	chr10	79000000	79500000	659	0.0271735	408	6	247	0	97.5889	1.3514	66.5446	0
659	chr10	79500000	80000000	660	0.492306	15	27	315	7	3.58783	6.0813	84.8646	2.14295
660	chr10	80000000	80500000	661	0.285074	3	1	56	2	0.717565	0.225233	15.087	0.612271
661	chr10	80500000	81000000	662	0.555195	1	17	0	17	0.239188	3.82896	0	5.2043
662	chr10	81000000	81500000	663	0.311882	11	1887	143	6	2.63107	425.015	38.5258	1.83681
663	chr10	81500000	82000000	664	0.150173	4	2	676	738	0.956754	0.450466	182.122	225.928
664	chr10	82000000	82500000	665	-0.226361	135	1187	10	3	32.2904	267.352	2.69411	0.918406
665	chr10	82500000	83000000	666	-1.03371	1	2	8	0	0.239188	0.450466	2.15529	0
666	chr10	83000000	83500000	667	-1.27498	10	31	22	7	2.39188	6.98223	5.92705	2.14295
667	chr10	83500000	84000000	668	-1.19637	8	626	15	10	1.91351	140.996	4.04117	3.06135
668	chr10	84000000	84500000	669	-1.19795	14	5	69	10	3.34864	1.12617	18.5894	3.06135
669	chr10	84500000	85000000	670	-1.1624	61	5	12	1	14.5905	1.12617	3.23294	0.306135
670	chr10	85000000	85500000	671	-1.2208	200	2	3	266	47.8377	0.450466	0.808234	81.432
671	chr10	85500000	86000000	672	-0.687732	538	452	13	17	128.683	101.805	3.50235	5.2043
672	chr10	86000000	86500000	673	-0.197305	3	1	38	3	0.717565	0.225233	10.2376	0.918406
673	chr10	86500000	87000000	674	-0.901872	217	19	20	9	51.9039	4.27943	5.38823	2.75522
674	chr10	87000000	87500000	675	-0.785612	25	16	2	4	5.97971	3.60373	0.538823	1.22454
675	chr10	87500000	88000000	676	-0.0910279	687	933	11	5	164.322	210.143	2.96353	1.53068
676	chr10	88000000	88500000	677	0.337461	105	0	8	3	25.1148	0	2.15529	0.918406
677	chr10	88500000	89000000	678	0.537159	2	4	305	1	0.478377	0.900933	82.1705	0.306135
678	chr10	89000000	89500000	679	0.567631	19	41	15	791	4.54458	9.23456	4.04117	242.153
679	chr10	89500000	90000000	680	0.740734	1043	2	153	145	249.474	0.450466	41.2199	44.3896
680	chr10	90000000	90500000	681	0.634266	44	513	61	6	10.5243	115.545	16.4341	1.83681
681	chr10	90500000	91000000	682	0.585058	1	1087	391	10	0.239188	244.828	105.34	3.06135
682	chr10	91000000	91500000	683	0.378127	360	290	14	9	86.1078	65.3176	3.77176	2.75522
683	chr10	91500000	92000000	684	-0.444597	7	898	3	4	1.67432	202.259	0.808234	1.22454
684	chr10	92000000	92500000	685	-0.601786	5	3	277	1	1.19594	0.6757	74.627	0.306135
685	chr10	92500000	93000000	686	0.348101	42	8	265	9	10.0459	1.80187	71.394	2.75522
686	chr10	93000000	93500000	687	0.28935	112	67	20	28	26.7891	15.0906	5.38823	8.57179
687	chr10	93500000	94000000	688	0.519237	481	13	591	28	115.05	2.92803	159.222	8.57179
688	chr10	94000000	94500000	689	0.568438	4	849	10	1	0.956754	191.223	2.69411	0.306135
689	chr10	94500000	95000000	690	0.405483	9	31	387	878	2.1527	6.98223	104.262	268.787
690	chr10	95000000	95500000	691	0.300701	52	10	420	6	12.4378	2.25233	113.153	1.83681
691	chr10	95500000	96000000	692	0.0781121	8	17	96	17	1.91351	3.82896	25.8635	5.2043
692	chr10	96000000	96500000	693	0.248492	53	4	10	277	12.677	0.900933	2.69411	84.7995
693	chr10	96500000	97000000	694	0.194656	761	15	264	6	182.022	3.3785	71.1246	1.83681
694	chr10	97000000	97500000	695	0.343215	529	12	75	7	126.531	2.7028	20.2059	2.14295
695	chr10	97500000	98000000	696	0.456403	34	637	1152	1301	8.13241	143.474	310.362	398.282
696	chr10	98000000	98500000	697	0.553744	238	0	339	1253	56.9268	0	91.3305	383.588
697	chr10	98500000	99000000	698	0.603613	92	6	689	397	22.0053	1.3514	185.624	121.536
698	chr10	99000000	99500000	699	0.637574	697	12	172	1	166.714	2.7028	46.3388	0.306135
699	chr10	99500000	100000000	700	0.439676	0	7	586	1	0	1.57663	157.875	0.306135
700	chr10	100000000	100500000	701	0.13247	3	6	186	17	0.717565	1.3514	50.1105	5.2043
701	chr10	100500000	101000000	702	-0.346893	797	17	567	13	190.633	3.82896	152.756	3.97976
702	chr10	101000000	101500000	703	0.270972	1	4	500	8	0.239188	0.900933	134.706	2.44908
703	chr10	101500000	102000000	704	0.568748	32	7	157	688	7.65403	1.57663	42.2976	210.621
704	chr10	102000000	102500000	705	0.636036	470	662	164	6	112.419	149.104	44.1835	1.83681
705	chr10	102500000	103000000	706	0.61328	357	1	317	1	85.3903	0.225233	85.4034	0.306135
706	chr10	103000000	103500000	707	0.606345	252	8	63	8	60.2755	1.80187	16.9729	2.44908
707	chr10	103500000	104000000	708	0.689086	14	257	780	1123	3.34864	57.8849	210.141	343.79
708	chr10	104000000	104500000	709	0.712303	420	562	1051	8	100.459	126.581	283.151	2.44908
709	chr10	104500000	105000000	710	0.720127	35	625	224	0	8.3716	140.771	60.3482	0
710	chr10	105000000	105500000	711	0.701614	923	336	745	0	220.771	75.6784	200.712	0
711	chr10	105500000	106000000	712	0.566477	855	931	3	0	204.506	209.692	0.808234	0
712	chr10	106000000	106500000	713	-0.0305237	12	0	33	7	2.87026	0	8.89058	2.14295
713	chr10	106500000	107000000	714	-0.998753	6	41	5	0	1.43513	9.23456	1.34706	0
714	chr10	107000000	107500000	715	-1.28981	36	942	130	7	8.61078	212.17	35.0235	2.14295
715	chr10	107500000	108000000	716	-1.24847	15	6	10	16	3.58783	1.3514	2.69411	4.89817
716	chr10	108000000	108500000	717	-1.2232	11	81	49	7	2.63107	18.2439	13.2012	2.14295
717	chr10	108500000	109000000	718	-1.16116	3	1780	67	2	0.717565	400.915	18.0506	0.612271
718	chr10	109000000	109500000	719	-1.18508	208	1	4	4	49.7512	0.225233	1.07765	1.22454
719	chr10	109500000	110000000	720	-1.16546	43	792	14	95	10.2851	178.385	3.77176	29.0829
720	chr10	110000000	110500000	721	-1.06753	7	30	14	7	1.67432	6.757	3.77176	2.14295
721	chr10	110500000	111000000	722	-1.06557	203	12	11	7	48.5553	2.7028	2.96353	2.14295
722	chr10	111000000	111500000	723	-1.05398	6	8	7	9	1.43513	1.80187	1.88588	2.75522
723	chr10	111500000	112000000	724	0.0328465	234	12	44	154	55.9701	2.7028	11.8541	47.1449
724	chr10	112000000	112500000	725	0.305252	0	1	539	0	0	0.225233	145.213	0
725	chr10	112500000	113000000	726	-0.0453154	81	11	331	5	19.3743	2.47757	89.1752	1.53068
726	chr10	113000000	113500000	727	-0.92352	12	9	6	25	2.87026	2.0271	1.61647	7.65339
727	chr10	113500000	114000000	728	-0.780394	18	13	344	6	4.30539	2.92803	92.6775	1.83681
728	chr10	114000000	114500000	729	-0.128372	108	1	436	11	25.8324	0.225233	117.463	3.36749
729	chr10	114500000	115000000	730	0.212964	0	79	51	0	0	17.7934	13.74	0
730	chr10	115000000	115500000	731	0.127429	45	0	6	1	10.7635	0	1.61647	0.306135
731	chr10	115500000	116000000	732	0.549403	86	431	278	184	20.5702	97.0755	74.8964	56.3289
732	chr10	116000000	116500000	733	0.192471	190	4	6	15	45.4458	0.900933	1.61647	4.59203
733	chr10	116500000	117000000	734	0.0610114	4	103	5	2	0.956754	23.199	1.34706	0.612271
734	chr10	117000000	117500000	735	-0.729327	68	0	40	9	16.2648	0	10.7765	2.75522
735	chr10	117500000	118000000	736	-0.21339	202	1959	65	346	48.3161	441.232	17.5117	105.923
736	chr10	118000000	118500000	737	-0.514921	91	25	199	3	21.7661	5.63083	53.6129	0.918406
737	chr10	118500000	119000000	738	-0.465634	6	11	7	227	1.43513	2.47757	1.88588	69.4927
738	chr10	119000000	119500000	739	-0.0305673	2	5	51	3	0.478377	1.12617	13.74	0.918406
739	chr10	119500000	120000000	740	-0.235168	356	0	31	844	85.1511	0	8.35175	258.378
740	chr10	120000000	120500000	741	0.094298	14	17	46	1112	3.34864	3.82896	12.3929	340.423
741	chr10	120500000	121000000	742	0.580389	10	249	456	4	2.39188	56.0831	122.852	1.22454
742	chr10	121000000	121500000	743	0.773762	570	3	728	12	136.337	0.6757	196.132	3.67363
743	chr10	121500000	122000000	744	0.509033	77	9	12	319	18.4175	2.0271	3.23294	97.6572
744	chr10	122000000	122500000	745	-0.250257	5	8	9	147	1.19594	1.80187	2.4247	45.0019
745	chr10	122500000	123000000	746	-0.396595	3	1	1	460	0.717565	0.225233	0.269411	140.822
746	chr10	123000000	123500000	747	-0.536898	39	9	10	20	9.32835	2.0271	2.69411	6.12271
747	chr10	123500000	124000000	748	0.151132	0	0	22	1	0	0	5.92705	0.306135
748	chr10	124000000	124500000	749	0.262061	15	1085	115	2706	3.58783	244.378	30.9823	828.403
749	chr10	124500000	125000000	750	0.455504	575	39	149	4	137.533	8.78409	40.1423	1.22454
750	chr10	125000000	125500000	751	0.232604	288	2	97	1290	68.8863	0.450466	26.1329	394.915
751	chr10	125500000	126000000	752	0.168038	1	7	119	1	0.239188	1.57663	32.06	0.306135
752	chr10	126000000	126500000	753	0.643907	136	114	206	11	32.5296	25.6766	55.4988	3.36749
753	chr10	126500000	127000000	754	0.00843446	17	0	8	0	4.0662	0	2.15529	0
754	chr10	127000000	127500000	755	-0.367496	40	166	14	14	9.56754	37.3887	3.77176	4.2859
755	chr10	127500000	128000000	756	-0.582797	25	4	28	8	5.97971	0.900933	7.54352	2.44908
756	chr10	128000000	128500000	757	-0.765449	276	12	15	1170	66.016	2.7028	4.04117	358.178
757	chr10	128500000	129000000	758	-0.727982	74	2	211	1	17.6999	0.450466	56.8458	0.306135
758	chr10	129000000	129500000	759	-0.647455	141	9	0	0	33.7256	2.0271	0	0
759	chr10	129500000	130000000	760	0.07047	220	34	119	0	52.6215	7.65793	32.06	0
760	chr10	130000000	130500000	761	-0.275408	19	352	0	0	4.54458	79.2821	0	0
761	chr10	130500000	131000000	762	-0.0786255	35	7	228	276	8.3716	1.57663	61.4258	84.4934
762	chr10	131000000	131500000	763	0.0477244	272	0	52	3	65.0593	0	14.0094	0.918406
763	chr10	131500000	132000000	764	0.159529	8	4	357	13	1.91351	0.900933	96.1799	3.97976
764	chr10	132000000	132500000	765	-0.218413	5	43	3	2891	1.19594	9.68503	0.808234	885.038
765	chr10	132500000	133000000	766	-0.157131	24	2	250	4	5.74052	0.450466	67.3529	1.22454
766	chr10	133000000	133500000	767	-0.149047	6	5	194	6	1.43513	1.12617	52.2658	1.83681
767	chr10	133500000	134000000	768	0.250649	10	19	188	2	2.39188	4.27943	50.6493	0.612271
768	chr10	134000000	134500000	769	0.48522	596	0	308	0	142.556	0	82.9787	0
769	chr10	134500000	135000000	770	0.127796	180	4	255	3	43.0539	0.900933	68.6999	0.918406
770	chr10	135000000	135500000	771	0.498966	195	398	405	10	46.6417	89.6428	109.112	3.06135
772	chr11	0	500000	773	0.9886	1720	2092	1859	3446	411.404	471.188	500.836	1054.94
773	chr11	500000	1000000	774	1.03936	1114	2483	1745	1762	266.456	559.254	470.123	539.411
774	chr11	1000000	1500000	775	0.783701	231	449	963	316	55.2525	101.13	259.443	96.7388
775	chr11	1500000	2000000	776	0.801944	2107	702	681	1469	503.97	158.114	183.469	449.713
776	chr11	2000000	2500000	777	0.639427	1459	212	826	94	348.976	47.7494	222.534	28.7767
777	chr11	2500000	3000000	778	0.501653	2176	6597	1076	1125	520.474	1485.86	289.887	344.402
778	chr11	3000000	3500000	779	0.861166	1639	2066	674	1736	392.03	465.332	181.583	531.451
779	chr11	3500000	4000000	780	0.854499	2197	2051	2661	3616	525.497	461.953	716.904	1106.99
780	chr11	4000000	4500000	781	0.0880656	1829	2898	1128	15	437.476	652.726	303.896	4.59203
781	chr11	4500000	5000000	782	-0.773055	287	13	141	1309	68.6471	2.92803	37.987	400.731
782	chr11	5000000	5500000	783	-1.01532	60	1277	111	10	14.3513	287.623	29.9047	3.06135
783	chr11	5500000	6000000	784	-0.633595	114	232	18	2	27.2675	52.2541	4.84941	0.612271
784	chr11	6000000	6500000	785	-0.080162	1963	139	929	444	469.527	31.3074	250.283	135.924
785	chr11	6500000	7000000	786	0.0614888	1573	407	730	1309	376.243	91.6699	196.67	400.731
786	chr11	7000000	7500000	787	-0.88902	0	2	614	1	0	0.450466	165.419	0.306135
787	chr11	7500000	8000000	788	-0.653122	19	46	1434	219	4.54458	10.3607	386.336	67.0437
788	chr11	8000000	8500000	789	0.0817264	38	15	560	143	9.08916	3.3785	150.87	43.7774
789	chr11	8500000	9000000	790	0.465162	2643	2175	3344	5872	632.175	489.882	900.912	1797.63
790	chr11	9000000	9500000	791	0.812729	3939	2594	2150	2127	942.163	584.255	579.235	651.15
791	chr11	9500000	10000000	792	0.624236	1246	3250	2912	1072	298.029	732.008	784.526	328.177
792	chr11	10000000	10500000	793	0.568875	1493	3314	869	971	357.108	746.423	234.119	297.258
793	chr11	10500000	11000000	794	0.64729	2924	1016	1293	553	699.387	228.837	348.349	169.293
794	chr11	11000000	11500000	795	0.249909	808	169	1098	25	193.264	38.0644	295.814	7.65339
795	chr11	11500000	12000000	796	0.341256	1959	1947	1368	717	468.57	438.529	368.555	219.499
796	chr11	12000000	12500000	797	0.206043	716	3447	1110	3218	171.259	776.379	299.047	985.144
797	chr11	12500000	13000000	798	0.0251753	1614	1828	719	725	386.05	411.726	193.707	221.948
798	chr11	13000000	13500000	799	0.0261149	911	2392	719	703	217.901	538.758	193.707	215.213
799	chr11	13500000	14000000	800	-0.192349	189	2027	522	273	45.2066	456.548	140.633	83.575
800	chr11	14000000	14500000	801	0.133934	2021	1498	1954	2314	483.4	337.399	526.43	708.397
801	chr11	14500000	15000000	802	0.0156809	1046	112	862	1460	250.191	25.2261	232.233	446.958
802	chr11	15000000	15500000	803	-0.847556	9	139	51	0	2.1527	31.3074	13.74	0
803	chr11	15500000	16000000	804	-1.03697	106	0	636	850	25.354	0	171.346	260.215
804	chr11	16000000	16500000	805	-1.04075	97	155	679	22	23.2013	34.9111	182.93	6.73498
805	chr11	16500000	17000000	806	-0.331791	1651	114	689	1339	394.9	25.6766	185.624	409.915
806	chr11	17000000	17500000	807	0.579248	2364	3630	2455	33	565.441	817.596	661.405	10.1025
807	chr11	17500000	18000000	808	0.112309	913	2015	915	890	218.379	453.845	246.511	272.461
808	chr11	18000000	18500000	809	0.481664	1226	421	3032	2863	293.245	94.8232	816.855	876.466
809	chr11	18500000	19000000	810	0.216787	4484	127	1520	4304	1072.52	28.6046	409.505	1317.61
810	chr11	19000000	19500000	811	-0.269492	1356	5	709	47	324.34	1.12617	191.013	14.3884
811	chr11	19500000	20000000	812	-0.561509	1405	138	404	2411	336.06	31.0822	108.842	738.093
812	chr11	20000000	20500000	813	-0.443134	91	274	754	0	21.7661	61.7139	203.136	0
813	chr11	20500000	21000000	814	-0.714668	181	75	325	1	43.2931	16.8925	87.5587	0.306135
814	chr11	21000000	21500000	815	-1.02704	53	17	292	3	12.677	3.82896	78.6681	0.918406
815	chr11	21500000	22000000	816	-0.867993	51	2	12	947	12.1986	0.450466	3.23294	289.91
816	chr11	22000000	22500000	817	-0.858461	9	1699	14	6	2.1527	382.671	3.77176	1.83681
817	chr11	22500000	23000000	818	-0.780832	12	1	55	489	2.87026	0.225233	14.8176	149.7
818	chr11	23000000	23500000	819	-0.870681	10	7	16	13	2.39188	1.57663	4.31058	3.97976
819	chr11	23500000	24000000	820	-0.801469	122	3	15	1	29.181	0.6757	4.04117	0.306135
820	chr11	24000000	24500000	821	-0.813535	50	46	10	159	11.9594	10.3607	2.69411	48.6755
821	chr11	24500000	25000000	822	-0.815218	9	4	5	4	2.1527	0.900933	1.34706	1.22454
822	chr11	25000000	25500000	823	-0.85798	16	8	6	244	3.82702	1.80187	1.61647	74.697
823	chr11	25500000	26000000	824	-0.843366	812	626	526	315	194.221	140.996	141.71	96.4327
824	chr11	26000000	26500000	825	-0.818418	460	4	556	365	110.027	0.900933	149.793	111.739
825	chr11	26500000	27000000	826	-0.866797	3	123	194	1	0.717565	27.7037	52.2658	0.306135
826	chr11	27000000	27500000	827	-0.467688	2	473	666	15	0.478377	106.535	179.428	4.59203
827	chr11	27500000	28000000	828	-0.510337	626	25	153	7	149.732	5.63083	41.2199	2.14295
828	chr11	28000000	28500000	829	-0.146019	84	1592	205	14	20.0918	358.571	55.2293	4.2859
829	chr11	28500000	29000000	830	-0.722355	92	302	191	1620	22.0053	68.0204	51.4576	495.939
830	chr11	29000000	29500000	831	-0.815936	6	15	20	213	1.43513	3.3785	5.38823	65.2068
831	chr11	29500000	30000000	832	-0.756876	537	9	7	83	128.444	2.0271	1.88588	25.4092
832	chr11	30000000	30500000	833	-0.553348	637	142	658	61	152.363	31.9831	177.273	18.6743
833	chr11	30500000	31000000	834	-0.436292	555	512	663	107	132.75	115.319	178.62	32.7565
834	chr11	31000000	31500000	835	-0.424103	30	451	65	72	7.17565	101.58	17.5117	22.0418
835	chr11	31500000	32000000	836	-0.134348	150	103	671	5	35.8783	23.199	180.775	1.53068
836	chr11	32000000	32500000	837	0.353942	1892	2	1274	1089	452.545	0.450466	343.23	333.381
837	chr11	32500000	33000000	838	0.483246	1176	98	1949	2065	281.286	22.0729	525.083	632.17
838	chr11	33000000	33500000	839	0.412808	2045	909	1574	262	489.14	204.737	424.054	80.2075
839	chr11	33500000	34000000	840	0.313044	2284	474	1946	1108	546.306	106.761	524.275	339.198
840	chr11	34000000	34500000	841	0.742385	2714	2516	1822	3592	649.157	566.687	490.868	1099.64
841	chr11	34500000	35000000	842	0.219218	1924	20	1348	4309	460.199	4.50466	363.167	1319.14
842	chr11	35000000	35500000	843	0.512377	1684	1227	1530	3382	402.793	276.361	412.199	1035.35
843	chr11	35500000	36000000	844	-0.265432	688	0	96	432	164.562	0	25.8635	132.251
844	chr11	36000000	36500000	845	-0.0507309	136	264	195	1053	32.5296	59.4616	52.5352	322.361
845	chr11	36500000	37000000	846	-0.132408	1129	0	1291	94	270.044	0	347.81	28.7767
846	chr11	37000000	37500000	847	-0.77754	406	5	100	14	97.1105	1.12617	26.9411	4.2859
847	chr11	37500000	38000000	848	-0.789524	157	1	110	0	37.5526	0.225233	29.6353	0
848	chr11	38000000	38500000	849	-0.775505	50	6	0	7	11.9594	1.3514	0	2.14295
849	chr11	38500000	39000000	850	-0.704744	26	17	2	3	6.2189	3.82896	0.538823	0.918406
850	chr11	39000000	39500000	851	-0.698762	442	11	158	0	105.721	2.47757	42.567	0
851	chr11	39500000	40000000	852	-0.797059	48	17	517	60	11.481	3.82896	139.286	18.3681
852	chr11	40000000	40500000	853	-0.782909	590	15	375	3	141.121	3.3785	101.029	0.918406
853	chr11	40500000	41000000	854	-0.950325	179	95	584	2	42.8147	21.3972	157.336	0.612271
854	chr11	41000000	41500000	855	-0.936829	43	0	744	0	10.2851	0	200.442	0
855	chr11	41500000	42000000	856	-1.01967	31	1	6	1	7.41484	0.225233	1.61647	0.306135
856	chr11	42000000	42500000	857	-1.0464	10	24	4	12	2.39188	5.4056	1.07765	3.67363
857	chr11	42500000	43000000	858	-0.98853	295	198	261	2	70.5606	44.5962	70.3164	0.612271
858	chr11	43000000	43500000	859	-0.61274	1195	1038	132	4	285.83	233.792	35.5623	1.22454
859	chr11	43500000	44000000	860	-0.158492	1308	1189	334	1227	312.858	267.802	89.9834	375.628
860	chr11	44000000	44500000	861	-0.0347454	491	2501	1448	502	117.442	563.308	390.108	153.68
861	chr11	44500000	45000000	862	0.289326	1306	1694	2260	39	312.38	381.545	608.87	11.9393
862	chr11	45000000	45500000	863	0.621556	2766	1876	972	2734	661.595	422.537	261.868	836.974
863	chr11	45500000	46000000	864	0.634835	2779	3544	2269	1422	664.705	798.226	611.295	435.325
864	chr11	46000000	46500000	865	0.844035	4364	2813	3510	657	1043.82	633.581	945.634	201.131
865	chr11	46500000	47000000	866	0.858994	7172	3487	4508	3079	1715.46	785.388	1214.51	942.591
866	chr11	47000000	47500000	867	0.766584	2529	5629	2393	3303	604.908	1267.84	644.702	1011.17
867	chr11	47500000	48000000	868	0.586434	4100	2484	2065	6875	980.673	559.479	556.335	2104.68
868	chr11	48000000	48500000	869	-0.329834	867	556	366	8	207.376	125.23	98.6046	2.44908
870	chr11	49000000	49500000	871	-1.05226	448	5	204	1467	107.156	1.12617	54.9599	449.101
882	chr11	55000000	55500000	883	-0.662277	185	381	62	85	44.2499	85.8138	16.7035	26.0215
883	chr11	55500000	56000000	884	-0.992789	550	4	354	13	131.554	0.900933	95.3716	3.97976
884	chr11	56000000	56500000	885	-1.14417	340	1	10	116	81.3241	0.225233	2.69411	35.5117
885	chr11	56500000	57000000	886	-0.789473	655	1060	624	1440	156.668	238.747	168.113	440.835
886	chr11	57000000	57500000	887	0.324808	1266	4413	4592	2241	302.813	993.954	1237.14	686.05
887	chr11	57500000	58000000	888	-0.530904	1499	154	619	85	358.543	34.6859	166.766	26.0215
888	chr11	58000000	58500000	889	-0.453759	394	271	690	46	94.2402	61.0382	185.894	14.0822
889	chr11	58500000	59000000	890	-0.421629	718	752	1188	2629	171.737	169.375	320.061	804.83
890	chr11	59000000	59500000	891	-0.159334	931	1838	1644	3171	222.684	413.979	442.912	970.755
891	chr11	59500000	60000000	892	-0.485131	3041	3111	2634	158	727.372	700.7	709.63	48.3694
892	chr11	60000000	60500000	893	-0.540096	1216	579	1375	1228	290.853	130.41	370.441	375.934
893	chr11	60500000	61000000	894	0.706587	5824	6628	2395	8644	1393.03	1492.85	645.24	2646.23
894	chr11	61000000	61500000	895	0.856434	5002	7233	3529	3999	1196.42	1629.11	950.753	1224.24
895	chr11	61500000	62000000	896	0.814996	6860	1918	3787	1314	1640.83	431.997	1020.26	402.262
896	chr11	62000000	62500000	897	0.790252	4650	7838	5012	549	1112.23	1765.38	1350.29	168.068
897	chr11	62500000	63000000	898	0.672523	3347	1731	3049	2994	800.564	389.879	821.435	916.57
898	chr11	63000000	63500000	899	0.672018	4212	8061	2630	579	1007.46	1815.6	708.552	177.252
899	chr11	63500000	64000000	900	0.74916	5996	580	1018	4019	1434.17	130.635	274.261	1230.36
900	chr11	64000000	64500000	901	0.745823	2028	2448	894	4796	485.074	551.371	240.854	1468.23
901	chr11	64500000	65000000	902	0.708978	3376	3457	2513	1799	807.5	778.631	677.031	550.738
902	chr11	65000000	65500000	903	0.686632	3670	957	3482	1849	877.822	215.548	938.091	566.044
903	chr11	65500000	66000000	904	0.67356	3476	4026	2725	782	831.419	906.789	734.146	239.398
904	chr11	66000000	66500000	905	0.685795	4117	2095	4602	4364	984.739	471.864	1239.83	1335.98
905	chr11	66500000	67000000	906	0.661666	5497	4248	2977	1765	1314.82	956.791	802.038	540.329
906	chr11	67000000	67500000	907	0.728995	5201	3238	3358	2881	1244.02	729.305	904.684	881.976
907	chr11	67500000	68000000	908	0.715662	1942	4166	2513	4308	464.504	938.321	677.031	1318.83
908	chr11	68000000	68500000	909	0.680945	3723	1158	4209	2743	890.499	260.82	1133.95	839.73
909	chr11	68500000	69000000	910	0.667994	2673	2394	3150	6113	639.351	539.208	848.646	1871.41
910	chr11	69000000	69500000	911	0.524588	1094	2785	1618	124	261.672	627.274	435.908	37.9608
911	chr11	69500000	70000000	912	0.468546	1666	1161	1982	2974	398.488	261.496	533.973	910.447
912	chr11	70000000	70500000	913	0.491666	2428	6126	1091	2931	580.75	1379.78	293.928	897.283
913	chr11	70500000	71000000	914	0.445113	2512	1037	681	2618	600.841	233.567	183.469	801.463
914	chr11	71000000	71500000	915	0.689503	3979	3696	3167	5849	951.731	832.462	853.226	1790.59
915	chr11	71500000	72000000	916	0.759327	5543	5769	4657	2123	1325.82	1299.37	1254.65	649.926
916	chr11	72000000	72500000	917	0.740232	5117	6200	2377	1870	1223.93	1396.45	640.391	572.473
917	chr11	72500000	73000000	918	0.736655	3369	1107	2023	742	805.826	249.333	545.019	227.152
918	chr11	73000000	73500000	919	0.763982	3770	3547	2170	1617	901.74	798.902	584.623	495.021
919	chr11	73500000	74000000	920	0.79274	6177	4276	4771	4036	1477.47	963.097	1285.36	1235.56
920	chr11	74000000	74500000	921	0.69516	5375	10327	1223	301	1285.64	2325.98	329.49	92.1468
921	chr11	74500000	75000000	922	0.531697	2362	388	1751	1657	564.963	87.3905	471.739	507.266
922	chr11	75000000	75500000	923	0.632465	3119	6044	3700	506	746.029	1361.31	996.822	154.905
923	chr11	75500000	76000000	924	0.53388	5164	299	1546	1323	1235.17	67.3447	416.51	405.017
924	chr11	76000000	76500000	925	0.530168	3182	1931	2466	791	761.098	434.925	664.369	242.153
925	chr11	76500000	77000000	926	0.511924	3394	1361	1998	3235	811.806	306.542	538.284	990.348
926	chr11	77000000	77500000	927	0.473802	1711	4679	2726	854	409.251	1053.87	734.416	261.44
927	chr11	77500000	78000000	928	0.574117	3522	3336	3518	541	842.422	751.378	947.789	165.619
928	chr11	78000000	78500000	929	-0.0277198	2396	611	2075	2185	573.096	137.617	559.029	668.906
929	chr11	78500000	79000000	930	-0.717793	682	1937	1116	1	163.127	436.277	300.663	0.306135
930	chr11	79000000	79500000	931	-0.928219	1312	12	558	1041	313.815	2.7028	150.332	318.687
931	chr11	79500000	80000000	932	-1.05846	590	112	147	150	141.121	25.2261	39.6035	45.9203
932	chr11	80000000	80500000	933	-1.14025	246	0	529	0	58.8404	0	142.519	0
933	chr11	80500000	81000000	934	-1.08934	1268	1257	166	1383	303.291	283.118	44.7223	423.385
934	chr11	81000000	81500000	935	-1.06451	262	577	92	0	62.6674	129.96	24.7859	0
935	chr11	81500000	82000000	936	-1.04626	642	211	137	44	153.559	47.5242	36.9094	13.47
936	chr11	82000000	82500000	937	-0.754623	732	674	200	1689	175.086	151.807	53.8823	517.063
937	chr11	82500000	83000000	938	0.0939765	1317	2262	1527	59	315.011	509.477	411.391	18.062
938	chr11	83000000	83500000	939	-0.692017	999	1405	249	8	238.949	316.453	67.0834	2.44908
939	chr11	83500000	84000000	940	-0.933611	10	151	300	2374	2.39188	34.0102	80.8234	726.766
940	chr11	84000000	84500000	941	-0.849927	1024	7	190	2825	244.929	1.57663	51.1882	864.833
941	chr11	84500000	85000000	942	-0.800607	429	535	122	239	102.612	120.5	32.8682	73.1664
942	chr11	85000000	85500000	943	-0.529133	232	2345	300	431	55.4917	528.172	80.8234	131.944
943	chr11	85500000	86000000	944	0.0465606	2127	1713	1748	1455	508.754	385.824	470.931	445.427
944	chr11	86000000	86500000	945	-0.190817	1327	639	828	1656	317.403	143.924	223.073	506.96
945	chr11	86500000	87000000	946	-0.150436	466	1578	404	2024	111.462	355.418	108.842	619.618
946	chr11	87000000	87500000	947	-0.710961	426	1341	315	370	101.894	302.038	84.8646	113.27
947	chr11	87500000	88000000	948	-0.609425	429	433	233	29	102.612	97.526	62.7729	8.87793
948	chr11	88000000	88500000	949	-0.275009	724	241	842	17	173.172	54.2812	226.844	5.2043
949	chr11	88500000	89000000	950	-0.643307	415	1144	171	8	99.2632	257.667	46.0694	2.44908
950	chr11	89000000	89500000	951	-0.921522	46	359	189	0	11.0027	80.8587	50.9188	0
952	chr11	90000000	90500000	953	-0.789502	94	1200	308	1620	22.4837	270.28	82.9787	495.939
953	chr11	90500000	91000000	954	-0.956288	762	1439	144	5	182.262	324.111	38.7952	1.53068
954	chr11	91000000	91500000	955	-0.938503	595	3	156	40	142.317	0.6757	42.0282	12.2454
955	chr11	91500000	92000000	956	-0.847352	32	156	761	5	7.65403	35.1364	205.022	1.53068
956	chr11	92000000	92500000	957	-0.57518	1774	831	653	189	424.32	187.169	175.926	57.8596
957	chr11	92500000	93000000	958	-0.221583	1398	529	104	326	334.385	119.148	28.0188	99.8002
958	chr11	93000000	93500000	959	0.353886	719	2564	1869	4458	171.976	577.498	503.53	1364.75
959	chr11	93500000	94000000	960	-0.0923491	1535	1634	1616	4258	367.154	368.031	435.369	1303.52
960	chr11	94000000	94500000	961	0.14184	4675	6189	3293	997	1118.21	1393.97	887.172	305.217
961	chr11	94500000	95000000	962	0.248488	2768	4719	2298	3096	662.074	1062.88	619.107	947.795
962	chr11	95000000	95500000	963	-0.324385	2559	982	1132	175	612.083	221.179	304.974	53.5737
963	chr11	95500000	96000000	964	0.00804806	911	77	1275	295	217.901	17.343	343.5	90.31
964	chr11	96000000	96500000	965	-0.311736	2683	966	484	297	641.743	217.575	130.395	90.9222
965	chr11	96500000	97000000	966	-0.764488	547	713	416	1200	130.836	160.591	112.075	367.363
966	chr11	97000000	97500000	967	-0.734654	217	741	273	0	51.9039	166.898	73.5493	0
967	chr11	97500000	98000000	968	-0.755114	308	42	59	35	73.67	9.45979	15.8953	10.7147
968	chr11	98000000	98500000	969	-0.778937	1124	946	479	1427	268.848	213.071	129.048	436.855
969	chr11	98500000	99000000	970	-0.705764	608	671	276	301	145.427	151.131	74.3576	92.1468
970	chr11	99000000	99500000	971	-0.829006	492	1465	299	952	117.681	329.967	80.554	291.441
971	chr11	99500000	100000000	972	-0.828798	776	12	7	1400	185.61	2.7028	1.88588	428.59
972	chr11	100000000	100500000	973	-0.836001	1292	212	677	15	309.031	47.7494	182.392	4.59203
973	chr11	100500000	101000000	974	-0.706635	1325	869	228	6	316.925	195.728	61.4258	1.83681
974	chr11	101000000	101500000	975	-0.873514	2488	3	876	27	595.101	0.6757	236.004	8.26566
975	chr11	101500000	102000000	976	-0.692796	1567	136	703	24	374.808	30.6317	189.396	7.34725
976	chr11	102000000	102500000	977	-0.00394816	1261	2229	1656	2234	301.617	502.045	446.145	683.907
977	chr11	102500000	103000000	978	-0.497347	1354	2377	1024	438	323.861	535.379	275.877	134.087
978	chr11	103000000	103500000	979	-0.153586	2266	1328	2448	299	542.001	299.11	659.519	91.5345
979	chr11	103500000	104000000	980	-0.830747	1321	1285	63	2014	315.968	289.425	16.9729	616.557
980	chr11	104000000	104500000	981	-0.802221	646	2473	584	15	154.516	557.002	157.336	4.59203
981	chr11	104500000	105000000	982	-0.798067	2158	3207	1116	681	516.169	722.323	300.663	208.478
982	chr11	105000000	105500000	983	-0.935961	775	524	871	1808	185.371	118.022	234.657	553.493
983	chr11	105500000	106000000	984	-0.630175	1476	1496	1054	305	353.042	336.949	283.96	93.3713
984	chr11	106000000	106500000	985	-0.407757	2531	2178	494	3	605.386	490.558	133.089	0.918406
985	chr11	106500000	107000000	986	-0.660075	1237	519	300	6	295.876	116.896	80.8234	1.83681
986	chr11	107000000	107500000	987	-0.415667	2817	3366	439	44	673.794	758.135	118.272	13.47
987	chr11	107500000	108000000	988	-0.0643058	4564	1726	1996	5431	1091.66	388.752	537.745	1662.62
988	chr11	108000000	108500000	989	0.189569	7095	6792	4027	4708	1697.04	1529.78	1084.92	1441.29
989	chr11	108500000	109000000	990	-0.0516266	1767	1325	3139	1609	422.646	298.434	845.682	492.572
990	chr11	109000000	109500000	991	-0.811564	384	1349	1318	2858	91.8484	303.84	355.084	874.935
991	chr11	109500000	110000000	992	-0.604852	2967	927	1048	3243	709.672	208.791	282.343	992.797
992	chr11	110000000	110500000	993	-0.180064	3740	1188	2412	2968	894.565	267.577	649.82	908.61
993	chr11	110500000	111000000	994	-0.75955	2820	1647	2053	889	674.511	370.959	553.102	272.154
994	chr11	111000000	111500000	995	0.0148209	4784	5463	3943	5392	1144.28	1230.45	1062.29	1650.68
995	chr11	111500000	112000000	996	0.593637	9950	9299	8052	7349	2379.93	2094.44	2169.3	2249.79
996	chr11	112000000	112500000	997	0.225039	9840	6566	6372	4010	2353.61	1478.88	1716.69	1227.6
997	chr11	112500000	113000000	998	-0.376712	2335	3900	4149	1096	558.505	878.409	1117.79	335.524
998	chr11	113000000	113500000	999	-0.261552	4961	6617	3008	721	1186.61	1490.37	810.39	220.724
999	chr11	113500000	114000000	1000	0.310368	6074	3933	7084	9545	1452.83	885.842	1908.51	2922.06
1000	chr11	114000000	114500000	1001	0.301508	9231	10088	5955	5250	2207.95	2272.15	1604.35	1607.21
1001	chr11	114500000	115000000	1002	0.237217	12855	11110	5582	3180	3074.77	2502.34	1503.85	973.511
1002	chr11	115000000	115500000	1003	-0.100429	7452	5357	3969	9560	1782.43	1206.57	1069.29	2926.65
1003	chr11	115500000	116000000	1004	-0.260345	6408	14504	3818	4015	1532.72	3266.78	1028.61	1229.13
1004	chr11	116000000	116500000	1005	-0.0824742	9867	10750	7095	3704	2360.07	2421.26	1911.47	1133.93
1005	chr11	116500000	117000000	1006	0.732704	37809	38773	20188	30287	9043.48	8732.97	5438.88	9271.92
1006	chr11	117000000	117500000	1007	0.645175	52001	67475	46662	38492	12438	15197.6	12571.3	11783.8
1007	chr11	117500000	118000000	1008	0.710341	173597	153904	110517	104654	41522.4	34664.3	29774.5	32038.3
1008	chr11	118000000	118500000	1009	1.01376	2171471	2312896	2109763	1528877	519391	520941	568394	468043
1009	chr11	118500000	119000000	1010	1.03343	153067	155029	114788	139197	36611.9	34917.7	30925.2	42613.1
1010	chr11	119000000	119500000	1011	0.824457	66125	50787	45162	49810	15816.3	11438.9	12167.2	15248.6
1011	chr11	119500000	120000000	1012	0.393558	20761	19007	14031	10133	4965.79	4281.01	3780.11	3102.07
1012	chr11	120000000	120500000	1013	0.0635689	22836	14582	13220	13631	5462.11	3284.35	3561.62	4172.93
1013	chr11	120500000	121000000	1014	-0.146478	12862	6610	4526	7771	3076.44	1488.79	1219.36	2378.98
1014	chr11	121000000	121500000	1015	0.193065	11587	6222	8908	5907	2771.48	1401.4	2399.92	1808.34
1015	chr11	121500000	122000000	1016	-0.754961	6855	9147	2150	2714	1639.64	2060.21	579.235	830.852
1016	chr11	122000000	122500000	1017	-0.596207	6032	5672	2753	3493	1442.78	1277.52	741.69	1069.33
1017	chr11	122500000	123000000	1018	0.177539	8581	6940	5769	5521	2052.48	1563.12	1554.23	1690.17
1018	chr11	123000000	123500000	1019	-0.374183	5417	9752	3856	1602	1295.68	2196.47	1038.85	490.429
1019	chr11	123500000	124000000	1020	-0.709608	3932	4497	2828	6196	940.489	1012.87	761.896	1896.82
1020	chr11	124000000	124500000	1021	-0.500517	4138	5804	2645	2827	989.762	1307.25	712.593	865.445
1021	chr11	124500000	125000000	1022	0.443053	10510	8825	7329	5598	2513.87	1987.68	1974.52	1713.75
1022	chr11	125000000	125500000	1023	0.387077	7827	4888	5073	5851	1872.13	1100.94	1366.72	1791.2
1023	chr11	125500000	126000000	1024	0.544095	8842	8893	5085	6768	2114.9	2003	1369.96	2071.92
1024	chr11	126000000	126500000	1025	0.335039	9008	6464	3056	7653	2154.61	1455.91	823.321	2342.85
1025	chr11	126500000	127000000	1026	-0.305741	1922	939	1087	498	459.72	211.494	292.85	152.455
1026	chr11	127000000	127500000	1027	-0.885631	1006	1079	1089	736	240.624	243.027	293.389	225.316
1027	chr11	127500000	128000000	1028	-0.5277	1434	427	2803	5469	342.996	96.1746	755.16	1674.25
1028	chr11	128000000	128500000	1029	0.531625	4643	7620	6530	5335	1110.55	1716.28	1759.26	1633.23
1029	chr11	128500000	129000000	1030	0.151127	6319	6088	4269	3305	1511.43	1371.22	1150.12	1011.78
1030	chr11	129000000	129500000	1031	-0.189713	1851	420	2418	1114	442.738	94.5979	651.437	341.035
1031	chr11	129500000	130000000	1032	0.260375	7730	7358	4773	7936	1848.93	1657.27	1285.9	2429.49
1032	chr11	130000000	130500000	1033	0.205533	6123	4023	2812	1651	1464.55	906.113	757.585	505.43
1033	chr11	130500000	131000000	1034	-0.188195	1241	3288	1793	1672	296.833	740.567	483.055	511.858
1034	chr11	131000000	131500000	1035	-0.0169102	2956	1468	958	158	707.041	330.642	258.096	48.3694
1035	chr11	131500000	132000000	1036	-0.334559	3673	1930	1558	1010	878.539	434.7	419.743	309.197
1036	chr11	132000000	132500000	1037	-0.725115	2476	2322	964	1468	592.231	522.991	259.713	449.407
1037	chr11	132500000	133000000	1038	-0.672368	226	2077	1131	1829	54.0566	467.809	304.704	559.922
1038	chr11	133000000	133500000	1039	-0.52309	4022	2761	1234	5773	962.016	621.869	332.454	1767.32
1039	chr11	133500000	134000000	1040	0.199015	2823	7675	2254	622	675.229	1728.66	607.253	190.416
1040	chr11	134000000	134500000	1041	0.818112	7774	6939	7120	4349	1859.45	1562.89	1918.21	1331.38
1041	chr11	134500000	135000000	1042	0.511007	7614	4004	3418	2886	1821.18	901.834	920.848	883.507
1056	chr12	6500000	7000000	1057	1.03537	71	1557	17	5	16.9824	350.688	4.57999	1.53068
1141	chr12	49000000	49500000	1142	1.00931	65	5	642	575	15.5472	1.12617	172.962	176.028
1142	chr12	49500000	50000000	1143	0.99097	340	65	672	64	81.3241	14.6402	181.044	19.5927
1150	chr12	53500000	54000000	1151	0.944752	799	55	680	787	191.112	12.3878	183.2	240.929
1284	chr12	120500000	121000000	1285	0.941102	385	17	146	1155	92.0876	3.82896	39.3341	353.586
1157	chr12	57000000	57500000	1158	0.938716	1049	915	510	68	250.909	206.088	137.4	20.8172
1143	chr12	50000000	50500000	1144	0.921146	529	1050	329	19	126.531	236.495	88.6364	5.81657
1156	chr12	56500000	57000000	1157	0.911561	310	1422	749	2	74.1484	320.282	201.789	0.612271
1285	chr12	121000000	121500000	1286	0.881236	728	168	323	554	174.129	37.8392	87.0199	169.599
1287	chr12	122000000	122500000	1288	0.877166	1399	458	330	886	334.625	103.157	88.9058	271.236
1290	chr12	123500000	124000000	1291	0.869655	1597	8	179	23	381.984	1.80187	48.2246	7.04112
1264	chr12	110500000	111000000	1265	0.867467	123	0	230	1	29.4202	0	61.9646	0.306135
1288	chr12	122500000	123000000	1289	0.866384	598	178	416	6	143.035	40.0915	112.075	1.83681
1286	chr12	121500000	122000000	1287	0.854473	965	13	376	0	230.817	2.92803	101.299	0
1289	chr12	123000000	123500000	1290	0.851073	734	22	1046	1520	175.564	4.95513	281.804	465.326
1267	chr12	112000000	112500000	1268	0.839121	676	163	856	8	161.691	36.713	230.616	2.44908
1144	chr12	50500000	51000000	1145	0.83268	2	29	827	13	0.478377	6.53176	222.803	3.97976
1263	chr12	110000000	110500000	1264	0.808576	245	0	10	1468	58.6012	0	2.69411	449.407
1149	chr12	53000000	53500000	1150	0.806643	21	5	186	6	5.02296	1.12617	50.1105	1.83681
1057	chr12	7000000	7500000	1058	0.805947	51	1172	155	59	12.1986	263.973	41.7588	18.062
1044	chr12	500000	1000000	1045	0.803536	708	2026	239	0	169.345	456.322	64.3893	0
1291	chr12	124000000	124500000	1292	0.793836	33	3	9	49	7.89322	0.6757	2.4247	15.0006
1146	chr12	51500000	52000000	1147	0.790417	85	16	192	13	20.331	3.60373	51.727	3.97976
1147	chr12	52000000	52500000	1148	0.789543	756	195	251	3	180.826	43.9205	67.6223	0.918406
1268	chr12	112500000	113000000	1269	0.780452	262	2487	183	31	62.6674	560.155	49.3023	9.4902
1145	chr12	51000000	51500000	1146	0.780289	1003	1599	248	38	239.906	360.148	66.814	11.6331
1155	chr12	56000000	56500000	1156	0.77775	1172	26	244	1281	280.329	5.85606	65.7364	392.16
1152	chr12	54500000	55000000	1153	0.771339	12	1029	218	9	2.87026	231.765	58.7317	2.75522
1062	chr12	9500000	10000000	1063	0.750382	37	5	229	690	8.84997	1.12617	61.6952	211.233
1283	chr12	120000000	120500000	1284	0.748077	125	1774	141	426	29.8986	399.564	37.987	130.414
1293	chr12	125000000	125500000	1294	0.74465	106	1	723	37	25.354	0.225233	194.784	11.327
1262	chr12	109500000	110000000	1263	0.737312	71	1686	634	4	16.9824	379.743	170.807	1.22454
1292	chr12	124500000	125000000	1293	0.726715	343	1806	677	1403	82.0416	406.771	182.392	429.508
1308	chr12	132500000	133000000	1309	0.721464	35	1	398	463	8.3716	0.225233	107.226	141.741
1261	chr12	109000000	109500000	1262	0.715288	13	198	230	14	3.10945	44.5962	61.9646	4.2859
1139	chr12	48000000	48500000	1140	0.704052	3	9	235	4	0.717565	2.0271	63.3117	1.22454
1151	chr12	54000000	54500000	1152	0.703588	4	1662	496	21	0.956754	374.338	133.628	6.42884
1158	chr12	57500000	58000000	1159	0.888041	63	1	505	662	15.0689	0.225233	136.053	202.662
1265	chr12	111000000	111500000	1266	0.717051	310	826	762	1	74.1484	186.043	205.292	0.306135
1059	chr12	8000000	8500000	1060	0.716631	566	154	437	25	135.381	34.6859	117.733	7.65339
1097	chr12	27000000	27500000	1098	0.668826	619	14	42	26	148.058	3.15326	11.3153	7.95952
1309	chr12	133000000	133500000	1310	0.668178	117	286	351	0	27.985	64.4167	94.5634	0
1266	chr12	111500000	112000000	1267	0.658072	4	1153	242	0	0.956754	259.694	65.1976	0
1180	chr12	68500000	69000000	1181	0.653567	109	0	281	0	26.0715	0	75.7046	0
1234	chr12	95500000	96000000	1235	0.651107	706	1403	262	119	168.867	316.002	70.5858	36.4301
1301	chr12	129000000	129500000	1302	0.111659	162	13	85	474	38.7485	2.92803	22.9	145.108
1148	chr12	52500000	53000000	1149	0.6467	2	2414	179	0	0.478377	543.713	48.2246	0
1212	chr12	84500000	85000000	1213	-0.839474	5	2	51	1	1.19594	0.450466	13.74	0.306135
1245	chr12	101000000	101500000	1246	-0.942726	42	8	16	5	10.0459	1.80187	4.31058	1.53068
1055	chr12	6000000	6500000	1056	0.638042	969	3	326	404	231.774	0.6757	87.8281	123.679
1307	chr12	132000000	132500000	1308	0.635745	1	0	235	0	0.239188	0	63.3117	0
1045	chr12	1000000	1500000	1046	0.604432	9	5	350	1777	2.1527	1.12617	94.294	544.003
1046	chr12	1500000	2000000	1047	0.603408	12	29	53	98	2.87026	6.53176	14.2788	30.0013
1043	chr12	0	500000	1044	0.578611	132	6	212	1631	31.5729	1.3514	57.1152	499.307
1270	chr12	113500000	114000000	1271	0.575604	629	0	177	96	150.45	0	47.6858	29.389
1052	chr12	4500000	5000000	1053	0.53624	140	645	7	769	33.4864	145.275	1.88588	235.418
1068	chr12	12500000	13000000	1069	0.505327	17	1294	306	913	4.0662	291.452	82.4399	279.502
1140	chr12	48500000	49000000	1141	0.493106	109	33	538	43	26.0715	7.4327	144.943	13.1638
1048	chr12	2500000	3000000	1049	0.487954	5	1	3	0	1.19594	0.225233	0.808234	0
1276	chr12	116500000	117000000	1277	0.48509	404	16	653	1165	96.6321	3.60373	175.926	356.648
1067	chr12	12000000	12500000	1068	0.480711	16	2	284	3	3.82702	0.450466	76.5128	0.918406
1061	chr12	9000000	9500000	1062	0.480429	1043	922	96	497	249.474	207.665	25.8635	152.149
1063	chr12	10000000	10500000	1064	0.475177	570	1773	331	203	136.337	399.338	89.1752	62.1455
1277	chr12	117000000	117500000	1278	0.472756	504	307	166	1295	120.551	69.1466	44.7223	396.445
1051	chr12	4000000	4500000	1052	0.465096	105	108	34	5	25.1148	24.3252	9.15999	1.53068
1279	chr12	118000000	118500000	1280	0.457818	889	2960	9	3	212.639	666.69	2.4247	0.918406
1058	chr12	7500000	8000000	1059	0.448322	453	50	491	11	108.352	11.2617	132.281	3.36749
1107	chr12	32000000	32500000	1108	0.447687	176	1037	935	3335	42.0972	233.567	251.9	1020.96
1060	chr12	8500000	9000000	1061	0.438243	183	314	13	1187	43.7715	70.7232	3.50235	363.383
1235	chr12	96000000	96500000	1236	0.424944	179	414	168	14	42.8147	93.2465	45.2611	4.2859
1260	chr12	108500000	109000000	1261	0.424815	9	1333	82	1403	2.1527	300.236	22.0917	429.508
1280	chr12	118500000	119000000	1281	0.422634	596	0	211	102	142.556	0	56.8458	31.2258
1153	chr12	55000000	55500000	1154	0.420462	68	22	430	1010	16.2648	4.95513	115.847	309.197
1093	chr12	25000000	25500000	1094	0.410009	3	3	205	10	0.717565	0.6757	55.2293	3.06135
1050	chr12	3500000	4000000	1051	0.409718	273	7	168	7	65.2984	1.57663	45.2611	2.14295
1259	chr12	108000000	108500000	1260	0.407628	6	221	8	36	1.43513	49.7765	2.15529	11.0209
1047	chr12	2000000	2500000	1048	0.404199	58	3	642	10	13.8729	0.6757	172.962	3.06135
1049	chr12	3000000	3500000	1050	0.397831	175	0	160	0	41.858	0	43.1058	0
1236	chr12	96500000	97000000	1237	0.397394	10	6	8	2	2.39188	1.3514	2.15529	0.612271
1064	chr12	10500000	11000000	1065	0.386348	358	804	53	1332	85.6295	181.087	14.2788	407.772
1269	chr12	113000000	113500000	1270	0.379856	11	7	213	9	2.63107	1.57663	57.3846	2.75522
1233	chr12	95000000	95500000	1234	0.3728	127	4	524	550	30.3769	0.900933	141.172	168.374
1135	chr12	46000000	46500000	1136	0.356905	622	1	3	0	148.775	0.225233	0.808234	0
1302	chr12	129500000	130000000	1303	0.351854	0	2	1	274	0	0.450466	0.269411	83.8811
1066	chr12	11500000	12000000	1067	0.349636	137	796	69	1523	32.7688	179.286	18.5894	466.244
1159	chr12	58000000	58500000	1160	0.3494	2	140	455	89	0.478377	31.5326	122.582	27.2461
1092	chr12	24500000	25000000	1093	0.325675	93	327	16	6	22.2445	73.6513	4.31058	1.83681
1054	chr12	5500000	6000000	1055	0.324205	86	63	111	18	20.5702	14.1897	29.9047	5.51044
1257	chr12	107000000	107500000	1258	0.321313	348	192	68	12	83.2376	43.2448	18.32	3.67363
1136	chr12	46500000	47000000	1137	0.316202	745	214	336	35	178.195	48.1999	90.5222	10.7147
1278	chr12	117500000	118000000	1279	0.310535	557	1	0	0	133.228	0.225233	0	0
1096	chr12	26500000	27000000	1097	0.307263	175	336	128	298	41.858	75.6784	34.4847	91.2284
1232	chr12	94500000	95000000	1233	0.301434	8	6	33	1	1.91351	1.3514	8.89058	0.306135
1258	chr12	107500000	108000000	1259	0.298659	55	18	913	9	13.1554	4.0542	245.973	2.75522
1181	chr12	69000000	69500000	1182	0.292944	873	0	32	1	208.812	0	8.62117	0.306135
1098	chr12	27500000	28000000	1099	0.289182	231	17	169	405	55.2525	3.82896	45.5305	123.985
1254	chr12	105500000	106000000	1255	0.252621	7	366	89	3	1.67432	82.4353	23.9776	0.918406
1305	chr12	131000000	131500000	1306	0.251557	877	1011	296	636	209.768	227.711	79.7458	194.702
1303	chr12	130000000	130500000	1304	0.247792	269	1	6	5	64.3417	0.225233	1.61647	1.53068
1230	chr12	93500000	94000000	1231	0.242567	3	160	365	2	0.717565	36.0373	98.3352	0.612271
1138	chr12	47500000	48000000	1139	0.220571	672	242	19	8	160.735	54.5064	5.11882	2.44908
1106	chr12	31500000	32000000	1107	0.208255	101	1	4	4	24.158	0.225233	1.07765	1.22454
1182	chr12	69500000	70000000	1183	0.206699	330	0	746	1	78.9322	0	200.981	0.306135
1256	chr12	106500000	107000000	1257	0.202905	245	408	4	5	58.6012	91.8951	1.07765	1.53068
1231	chr12	94000000	94500000	1232	0.202729	173	28	42	85	41.3796	6.30653	11.3153	26.0215
1053	chr12	5000000	5500000	1054	0.194525	83	20	151	4	19.8526	4.50466	40.6811	1.22454
1134	chr12	45500000	46000000	1135	0.186601	1	16	16	8	0.239188	3.60373	4.31058	2.44908
1154	chr12	55500000	56000000	1155	0.113691	37	30	20	1155	8.84997	6.757	5.38823	353.586
1252	chr12	104500000	105000000	1253	0.107567	16	28	757	2	3.82702	6.30653	203.944	0.612271
1306	chr12	131500000	132000000	1307	0.076042	42	0	478	414	10.0459	0	128.779	126.74
1105	chr12	31000000	31500000	1106	0.0622251	57	414	161	0	13.6337	93.2465	43.3752	0
1172	chr12	64500000	65000000	1173	0.0525482	68	4	345	2043	16.2648	0.900933	92.9469	625.435
1304	chr12	130500000	131000000	1305	0.0476845	144	9	0	0	34.4431	2.0271	0	0
1194	chr12	75500000	76000000	1195	0.0437433	5	1017	50	5	1.19594	229.062	13.4706	1.53068
1069	chr12	13000000	13500000	1070	0.0352859	40	0	83	3	9.56754	0	22.3611	0.918406
1094	chr12	25500000	26000000	1095	0.0326121	19	8	152	41	4.54458	1.80187	40.9505	12.5516
1294	chr12	125500000	126000000	1295	0.0154925	494	3	52	4	118.159	0.6757	14.0094	1.22454
1271	chr12	114000000	114500000	1272	0.0122066	1	1	21	0	0.239188	0.225233	5.65764	0
1229	chr12	93000000	93500000	1230	-0.0130736	2	15	240	19	0.478377	3.3785	64.6587	5.81657
1251	chr12	104000000	104500000	1252	-0.013865	83	1346	4	6	19.8526	303.164	1.07765	1.83681
1095	chr12	26000000	26500000	1096	-0.0232386	45	609	213	314	10.7635	137.167	57.3846	96.1265
1196	chr12	76500000	77000000	1197	-0.035719	47	5	195	288	11.2419	1.12617	52.5352	88.167
1065	chr12	11000000	11500000	1066	-0.0455237	260	15	15	12	62.189	3.3785	4.04117	3.67363
1282	chr12	119500000	120000000	1283	-0.0525873	4	5	218	11	0.956754	1.12617	58.7317	3.36749
1179	chr12	68000000	68500000	1180	-0.0764945	5	7	123	5	1.19594	1.57663	33.1376	1.53068
1091	chr12	24000000	24500000	1092	-0.0803554	8	1	1	159	1.91351	0.225233	0.269411	48.6755
1088	chr12	22500000	23000000	1089	-0.0980623	11	5	7	4	2.63107	1.12617	1.88588	1.22454
1228	chr12	92500000	93000000	1229	-0.119809	157	10	27	0	37.5526	2.25233	7.27411	0
1281	chr12	119000000	119500000	1282	-0.123078	712	15	88	1318	170.302	3.3785	23.7082	403.487
1168	chr12	62500000	63000000	1169	-0.125905	1	3	2	3	0.239188	0.6757	0.538823	0.918406
1223	chr12	90000000	90500000	1224	-0.136743	7	15	64	5	1.67432	3.3785	17.2423	1.53068
1222	chr12	89500000	90000000	1223	-0.139406	8	4	269	7	1.91351	0.900933	72.4717	2.14295
1169	chr12	63000000	63500000	1170	-0.139811	141	10	114	17	33.7256	2.25233	30.7129	5.2043
1247	chr12	102000000	102500000	1248	-0.154364	876	0	4	1670	209.529	0	1.07765	511.246
1173	chr12	65000000	65500000	1174	-0.157069	244	3	0	68	58.362	0.6757	0	20.8172
1237	chr12	97000000	97500000	1238	-0.169748	6	2	181	10	1.43513	0.450466	48.7635	3.06135
1195	chr12	76000000	76500000	1196	-0.171594	36	22	27	16	8.61078	4.95513	7.27411	4.89817
1255	chr12	106000000	106500000	1256	-0.179179	21	409	427	6	5.02296	92.1204	115.039	1.83681
1253	chr12	105000000	105500000	1254	-0.184935	70	0	64	67	16.7432	0	17.2423	20.5111
1137	chr12	47000000	47500000	1138	-0.188542	174	3	106	2	41.6188	0.6757	28.5576	0.612271
1275	chr12	116000000	116500000	1276	-0.192166	98	12	17	1102	23.4405	2.7028	4.57999	337.361
1197	chr12	77000000	77500000	1198	-0.214315	21	3	432	10	5.02296	0.6757	116.386	3.06135
1178	chr12	67500000	68000000	1179	-0.219479	37	5	509	1	8.84997	1.12617	137.13	0.306135
1082	chr12	19500000	20000000	1083	-0.21965	0	8	62	1	0	1.80187	16.7035	0.306135
1108	chr12	32500000	33000000	1109	-0.242587	14	1	5	0	3.34864	0.225233	1.34706	0
1072	chr12	14500000	15000000	1073	-0.261804	1	7	23	1901	0.239188	1.57663	6.19646	581.963
1240	chr12	98500000	99000000	1241	-0.27088	4	6	43	0	0.956754	1.3514	11.5847	0
1297	chr12	127000000	127500000	1298	-0.284786	10	20	473	729	2.39188	4.50466	127.432	223.173
1193	chr12	75000000	75500000	1194	-0.289215	9	8	51	1	2.1527	1.80187	13.74	0.306135
1128	chr12	42500000	43000000	1129	-0.289327	4	3	197	78	0.956754	0.6757	53.0741	23.8786
1298	chr12	127500000	128000000	1299	-0.30221	5	13	23	13	1.19594	2.92803	6.19646	3.97976
1081	chr12	19000000	19500000	1082	-0.306919	7	15	135	3	1.67432	3.3785	36.3705	0.918406
1203	chr12	80000000	80500000	1204	-0.31669	6	11	414	3	1.43513	2.47757	111.536	0.918406
1176	chr12	66500000	67000000	1177	-0.332068	572	12	25	6	136.816	2.7028	6.73529	1.83681
1187	chr12	72000000	72500000	1188	-0.339301	385	44	192	1611	92.0876	9.91026	51.727	493.184
1073	chr12	15000000	15500000	1074	-0.372812	77	14	397	48	18.4175	3.15326	106.956	14.6945
1086	chr12	21500000	22000000	1087	-0.374322	11	178	45	16	2.63107	40.0915	12.1235	4.89817
1227	chr12	92000000	92500000	1228	-0.384212	21	6	332	1011	5.02296	1.3514	89.4446	309.503
1183	chr12	70000000	70500000	1184	-0.394281	18	522	207	8	4.30539	117.572	55.7682	2.44908
1272	chr12	114500000	115000000	1273	-0.406107	105	1182	42	4	25.1148	266.226	11.3153	1.22454
1087	chr12	22000000	22500000	1088	-0.411151	7	12	53	2	1.67432	2.7028	14.2788	0.612271
1104	chr12	30500000	31000000	1105	-0.419602	4	8	14	6	0.956754	1.80187	3.77176	1.83681
1101	chr12	29000000	29500000	1102	-0.429615	57	1	7	1	13.6337	0.225233	1.88588	0.306135
1244	chr12	100500000	101000000	1245	-0.444773	314	0	184	4	75.1052	0	49.5717	1.22454
1099	chr12	28000000	28500000	1100	-0.446673	40	4	14	0	9.56754	0.900933	3.77176	0
1209	chr12	83000000	83500000	1210	-0.461761	25	31	9	31	5.97971	6.98223	2.4247	9.4902
1184	chr12	70500000	71000000	1185	-0.496456	2	6	6	5	0.478377	1.3514	1.61647	1.53068
1246	chr12	101500000	102000000	1247	-0.510379	196	239	3	6	46.8809	53.8307	0.808234	1.83681
1171	chr12	64000000	64500000	1172	-0.511528	15	63	39	2	3.58783	14.1897	10.507	0.612271
1300	chr12	128500000	129000000	1301	-0.524667	1	0	165	2177	0.239188	0	44.4529	666.457
1071	chr12	14000000	14500000	1072	-0.52523	72	26	56	6	17.2216	5.85606	15.087	1.83681
1202	chr12	79500000	80000000	1203	-0.534897	111	26	2	0	26.5499	5.85606	0.538823	0
1090	chr12	23500000	24000000	1091	-0.535654	5	7	142	18	1.19594	1.57663	38.2564	5.51044
1273	chr12	115000000	115500000	1274	-0.538114	0	1	21	410	0	0.225233	5.65764	125.516
1201	chr12	79000000	79500000	1202	-0.569698	3	6	13	3	0.717565	1.3514	3.50235	0.918406
1111	chr12	34000000	34500000	1112	-0.586634	5	14	153	5	1.19594	3.15326	41.2199	1.53068
1185	chr12	71000000	71500000	1186	-0.586809	11	17	3	4	2.63107	3.82896	0.808234	1.22454
1089	chr12	23000000	23500000	1090	-0.598121	13	17	9	1	3.10945	3.82896	2.4247	0.306135
1102	chr12	29500000	30000000	1103	-0.605604	114	133	13	693	27.2675	29.956	3.50235	212.152
1241	chr12	99000000	99500000	1242	-0.609308	294	163	300	50	70.3214	36.713	80.8234	15.3068
1274	chr12	115500000	116000000	1275	-0.613777	4	257	79	1	0.956754	57.8849	21.2835	0.306135
1174	chr12	65500000	66000000	1175	-0.614038	2	1	12	304	0.478377	0.225233	3.23294	93.0652
1075	chr12	16000000	16500000	1076	-0.614815	4	3	5	178	0.956754	0.6757	1.34706	54.4921
1161	chr12	59000000	59500000	1162	-0.626808	108	30	29	19	25.8324	6.757	7.81293	5.81657
1221	chr12	89000000	89500000	1222	-0.632955	21	9	20	6	5.02296	2.0271	5.38823	1.83681
1100	chr12	28500000	29000000	1101	-0.637028	82	6	45	14	19.6135	1.3514	12.1235	4.2859
1295	chr12	126000000	126500000	1296	-0.637705	2	6	7	1	0.478377	1.3514	1.88588	0.306135
1208	chr12	82500000	83000000	1209	-0.638764	30	267	199	6	7.17565	60.1373	53.6129	1.83681
1299	chr12	128000000	128500000	1300	-0.654371	15	22	6	25	3.58783	4.95513	1.61647	7.65339
1186	chr12	71500000	72000000	1187	-0.654491	8	7	7	2	1.91351	1.57663	1.88588	0.612271
1074	chr12	15500000	16000000	1075	-0.689649	0	0	51	8	0	0	13.74	2.44908
1070	chr12	13500000	14000000	1071	-0.691517	676	1349	5	3	161.691	303.84	1.34706	0.918406
1296	chr12	126500000	127000000	1297	-0.691704	6	15	146	4	1.43513	3.3785	39.3341	1.22454
1175	chr12	66000000	66500000	1176	-0.692402	1772	3	12	5	423.842	0.6757	3.23294	1.53068
1123	chr12	40000000	40500000	1124	-0.706549	16	6	10	2676	3.82702	1.3514	2.69411	819.218
1224	chr12	90500000	91000000	1225	-0.706926	3	8	2	1	0.717565	1.80187	0.538823	0.306135
1163	chr12	60000000	60500000	1164	-0.723227	2	248	88	2	0.478377	55.8578	23.7082	0.612271
1160	chr12	58500000	59000000	1161	-0.726341	10	59	854	644	2.39188	13.2888	230.077	197.151
1079	chr12	18000000	18500000	1080	-0.726374	5	22	271	1205	1.19594	4.95513	73.0105	368.893
1219	chr12	88000000	88500000	1220	-0.738764	10	7	21	11	2.39188	1.57663	5.65764	3.36749
1220	chr12	88500000	89000000	1221	-0.745158	11	12	166	6	2.63107	2.7028	44.7223	1.83681
1210	chr12	83500000	84000000	1211	-0.758254	6	12	40	8	1.43513	2.7028	10.7765	2.44908
1083	chr12	20000000	20500000	1084	-0.759474	135	1	59	0	32.2904	0.225233	15.8953	0
1080	chr12	18500000	19000000	1081	-0.760198	2	0	8	0	0.478377	0	2.15529	0
1162	chr12	59500000	60000000	1163	-0.768899	9	6	24	24	2.1527	1.3514	6.46587	7.34725
1177	chr12	67000000	67500000	1178	-0.773001	5	0	3	1	1.19594	0	0.808234	0.306135
1238	chr12	97500000	98000000	1239	-0.780685	1409	12	24	9	337.017	2.7028	6.46587	2.75522
1192	chr12	74500000	75000000	1193	-0.781701	10	0	36	0	2.39188	0	9.69881	0
1170	chr12	63500000	64000000	1171	-0.788612	12	37	7	9	2.87026	8.33363	1.88588	2.75522
1131	chr12	44000000	44500000	1132	-0.788683	99	49	425	129	23.6797	11.0364	114.5	39.4915
1188	chr12	72500000	73000000	1189	-0.792884	21	1	55	6	5.02296	0.225233	14.8176	1.83681
1078	chr12	17500000	18000000	1079	-0.801755	15	6	47	478	3.58783	1.3514	12.6623	146.333
1239	chr12	98000000	98500000	1240	-0.801828	67	4	264	66	16.0256	0.900933	71.1246	20.2049
1085	chr12	21000000	21500000	1086	-0.804765	7	393	42	3	1.67432	88.5166	11.3153	0.918406
1127	chr12	42000000	42500000	1128	-0.807872	15	6	10	28	3.58783	1.3514	2.69411	8.57179
1218	chr12	87500000	88000000	1219	-0.808132	11	18	27	9	2.63107	4.0542	7.27411	2.75522
1200	chr12	78500000	79000000	1201	-0.810267	7	4	176	6	1.67432	0.900933	47.4164	1.83681
1248	chr12	102500000	103000000	1249	-0.813093	3	1445	4	2	0.717565	325.462	1.07765	0.612271
1122	chr12	39500000	40000000	1123	-0.814982	3	4	7	225	0.717565	0.900933	1.88588	68.8805
1103	chr12	30000000	30500000	1104	-0.819228	6	19	32	4	1.43513	4.27943	8.62117	1.22454
1084	chr12	20500000	21000000	1085	-0.823813	164	98	120	39	39.2269	22.0729	32.3294	11.9393
1213	chr12	85000000	85500000	1214	-0.82651	450	0	0	0	107.635	0	0	0
1077	chr12	17000000	17500000	1078	-0.826821	14	42	59	8	3.34864	9.45979	15.8953	2.44908
1211	chr12	84000000	84500000	1212	-0.834451	19	79	34	20	4.54458	17.7934	9.15999	6.12271
1215	chr12	86000000	86500000	1216	-0.836184	14	7	16	4	3.34864	1.57663	4.31058	1.22454
1204	chr12	80500000	81000000	1205	-0.837777	26	6	12	19	6.2189	1.3514	3.23294	5.81657
1109	chr12	33000000	33500000	1110	-0.850695	4	7	15	1	0.956754	1.57663	4.04117	0.306135
1214	chr12	85500000	86000000	1215	-0.852738	4	0	2	1	0.956754	0	0.538823	0.306135
1076	chr12	16500000	17000000	1077	-0.856429	165	1	39	16	39.4661	0.225233	10.507	4.89817
1120	chr12	38500000	39000000	1121	-0.857383	2	1	0	19	0.478377	0.225233	0	5.81657
1226	chr12	91500000	92000000	1227	-0.872303	1	1	7	4	0.239188	0.225233	1.88588	1.22454
1167	chr12	62000000	62500000	1168	-0.88239	442	6	5	7	105.721	1.3514	1.34706	2.14295
1216	chr12	86500000	87000000	1217	-0.888123	6	20	94	201	1.43513	4.50466	25.3247	61.5332
1217	chr12	87000000	87500000	1218	-0.896834	7	18	83	21	1.67432	4.0542	22.3611	6.42884
1207	chr12	82000000	82500000	1208	-0.89739	21	7	12	8	5.02296	1.57663	3.23294	2.44908
1133	chr12	45000000	45500000	1134	-0.906592	10	287	65	22	2.39188	64.6419	17.5117	6.73498
1198	chr12	77500000	78000000	1199	-0.906991	6	16	5	4	1.43513	3.60373	1.34706	1.22454
1243	chr12	100000000	100500000	1244	-0.907776	24	14	23	41	5.74052	3.15326	6.19646	12.5516
1225	chr12	91000000	91500000	1226	-0.921741	2	1	640	0	0.478377	0.225233	172.423	0
1189	chr12	73000000	73500000	1190	-0.951818	1	9	320	46	0.239188	2.0271	86.2117	14.0822
1191	chr12	74000000	74500000	1192	-0.955374	0	2	674	1	0	0.450466	181.583	0.306135
1166	chr12	61500000	62000000	1167	-0.962491	10	9	176	5	2.39188	2.0271	47.4164	1.53068
1249	chr12	103000000	103500000	1250	-0.963802	8	1	4	2	1.91351	0.225233	1.07765	0.612271
1250	chr12	103500000	104000000	1251	-0.964212	8	5	12	146	1.91351	1.12617	3.23294	44.6958
1206	chr12	81500000	82000000	1207	-0.968762	179	3	15	16	42.8147	0.6757	4.04117	4.89817
1165	chr12	61000000	61500000	1166	-0.968892	5	8	10	4	1.19594	1.80187	2.69411	1.22454
1110	chr12	33500000	34000000	1111	-0.990851	10	12	7	8	2.39188	2.7028	1.88588	2.44908
1164	chr12	60500000	61000000	1165	-0.99177	7	4	25	9	1.67432	0.900933	6.73529	2.75522
1205	chr12	81000000	81500000	1206	-0.993639	3	1	1	5	0.717565	0.225233	0.269411	1.53068
1199	chr12	78000000	78500000	1200	-1.00432	1140	15	13	17	272.675	3.3785	3.50235	5.2043
1190	chr12	73500000	74000000	1191	-1.00527	10	3	7	203	2.39188	0.6757	1.88588	62.1455
1129	chr12	43000000	43500000	1130	-1.04627	4	3	17	2	0.956754	0.6757	4.57999	0.612271
1126	chr12	41500000	42000000	1127	-1.06223	107	9	517	2	25.5932	2.0271	139.286	0.612271
1130	chr12	43500000	44000000	1131	-1.13314	8	5	170	9	1.91351	1.12617	45.7999	2.75522
1121	chr12	39000000	39500000	1122	-1.14187	18	27	204	618	4.30539	6.0813	54.9599	189.192
1125	chr12	41000000	41500000	1126	-1.18682	87	19	22	157	20.8094	4.27943	5.92705	48.0633
1132	chr12	44500000	45000000	1133	-1.19426	333	2	11	3	79.6498	0.450466	2.96353	0.918406
1124	chr12	40500000	41000000	1125	-1.21014	34	1	6	3	8.13241	0.225233	1.61647	0.918406
1242	chr12	99500000	100000000	1243	-1.22859	45	89	73	13	10.7635	20.0458	19.667	3.97976
1510	chr13	99500000	100000000	1511	0.863294	443	50	219	13	105.96	11.2617	59.0011	3.97976
1394	chr13	41500000	42000000	1395	0.796964	800	211	439	3	191.351	47.5242	118.272	0.918406
1413	chr13	51000000	51500000	1414	0.785416	9	529	26	33	2.1527	119.148	7.0047	10.1025
1395	chr13	42000000	42500000	1396	0.784344	937	346	222	25	224.12	77.9307	59.8093	7.65339
1539	chr13	114000000	114500000	1540	0.777314	1054	335	3	4	252.105	75.4531	0.808234	1.22454
1415	chr13	52000000	52500000	1416	0.765573	414	2	1357	8	99.024	0.450466	365.591	2.44908
1372	chr13	30500000	31000000	1373	0.754737	96	138	522	261	22.9621	31.0822	140.633	79.9014
1396	chr13	42500000	43000000	1397	0.741727	924	1031	310	1179	221.01	232.215	83.5175	360.934
1404	chr13	46500000	47000000	1405	0.739903	705	2	152	8	168.628	0.450466	40.9505	2.44908
1412	chr13	50500000	51000000	1413	0.73967	203	17	429	0	48.5553	3.82896	115.578	0
1540	chr13	114500000	115000000	1541	0.73636	2	0	0	0	0.478377	0	0	0
1373	chr13	31000000	31500000	1374	0.73151	154	1362	163	0	36.835	306.768	43.9141	0
1363	chr13	26000000	26500000	1364	0.721233	251	646	79	65	60.0363	145.501	21.2835	19.8988
1411	chr13	50000000	50500000	1412	0.718166	16	395	425	4	3.82702	88.9671	114.5	1.22454
1416	chr13	52500000	53000000	1417	0.700324	1977	125	10	57	472.876	28.1541	2.69411	17.4497
1414	chr13	51500000	52000000	1415	0.698753	535	1424	114	49	127.966	320.732	30.7129	15.0006
1402	chr13	45500000	46000000	1403	0.697864	547	1408	315	241	130.836	317.128	84.8646	73.7786
1538	chr13	113500000	114000000	1539	0.695164	69	0	426	0	16.504	0	114.769	0
1354	chr13	21500000	22000000	1355	0.681193	25	39	566	45	5.97971	8.78409	152.487	13.7761
1367	chr13	28000000	28500000	1368	0.679783	0	1	654	0	0	0.225233	176.195	0
1366	chr13	27500000	28000000	1367	0.669358	3	7	124	1515	0.717565	1.57663	33.407	463.795
1364	chr13	26500000	27000000	1365	0.668422	541	17	949	232	129.401	3.82896	255.671	71.0234
1512	chr13	100500000	101000000	1513	0.665278	2	62	478	54	0.478377	13.9645	128.779	16.5313
1400	chr13	44500000	45000000	1401	0.66166	11	303	97	20	2.63107	68.2457	26.1329	6.12271
1368	chr13	28500000	29000000	1369	0.659114	279	66	90	2071	66.7336	14.8654	24.247	634.007
1353	chr13	21000000	21500000	1354	0.645695	94	5	254	2	22.4837	1.12617	68.4305	0.612271
1534	chr13	111500000	112000000	1535	0.639714	711	524	371	0	170.063	118.022	99.9516	0
1509	chr13	99000000	99500000	1510	0.644854	351	8	4	4	83.9551	1.80187	1.07765	1.22454
1360	chr13	24500000	25000000	1361	0.628911	41	4	99	5	9.80673	0.900933	26.6717	1.53068
1533	chr13	111000000	111500000	1534	0.5329	99	87	247	23	23.6797	19.5953	66.5446	7.04112
1375	chr13	32000000	32500000	1376	-0.107714	1	241	209	1	0.239188	54.2812	56.307	0.306135
1408	chr13	48500000	49000000	1409	0.609067	2	134	95	787	0.478377	30.1812	25.5941	240.929
1403	chr13	46000000	46500000	1404	0.586	1	14	487	1	0.239188	3.15326	131.203	0.306135
1511	chr13	100000000	100500000	1512	0.581956	267	66	257	607	63.8633	14.8654	69.2387	185.824
1410	chr13	49500000	50000000	1411	0.580039	134	5	41	5	32.0513	1.12617	11.0459	1.53068
1466	chr13	77500000	78000000	1467	0.568688	6	2	1055	33	1.43513	0.450466	284.229	10.1025
1377	chr13	33000000	33500000	1378	0.543361	39	0	61	4	9.32835	0	16.4341	1.22454
1352	chr13	20500000	21000000	1353	0.53128	44	574	87	1244	10.5243	129.284	23.4388	380.832
1369	chr13	29000000	29500000	1370	0.527599	7	119	28	67	1.67432	26.8027	7.54352	20.5111
1362	chr13	25500000	26000000	1363	0.497832	51	0	456	2	12.1986	0	122.852	0.612271
1365	chr13	27000000	27500000	1366	0.475348	6	9	56	1	1.43513	2.0271	15.087	0.306135
1409	chr13	49000000	49500000	1410	0.472253	4	3144	113	3	0.956754	708.133	30.4435	0.918406
1432	chr13	60500000	61000000	1433	0.466184	0	3	295	2	0	0.6757	79.4764	0.612271
1401	chr13	45000000	45500000	1402	0.43875	334	57	415	1	79.8889	12.8383	111.806	0.306135
1371	chr13	30000000	30500000	1372	0.437548	21	2619	422	10	5.02296	589.886	113.692	3.06135
1361	chr13	25000000	25500000	1362	0.433968	303	3	426	4	72.4741	0.6757	114.769	1.22454
1393	chr13	41000000	41500000	1394	0.418018	167	13	57	227	39.9445	2.92803	15.3565	69.4927
1537	chr13	113000000	113500000	1538	0.408518	39	2	3	8	9.32835	0.450466	0.808234	2.44908
1405	chr13	47000000	47500000	1406	0.389349	1	4	199	0	0.239188	0.900933	53.6129	0
1460	chr13	74500000	75000000	1461	0.352978	518	0	49	1052	123.9	0	13.2012	322.054
1374	chr13	31500000	32000000	1375	0.342633	96	26	2	8	22.9621	5.85606	0.538823	2.44908
1376	chr13	32500000	33000000	1377	0.303258	32	427	133	18	7.65403	96.1746	35.8317	5.51044
1392	chr13	40500000	41000000	1393	0.290958	13	399	245	24	3.10945	89.868	66.0058	7.34725
1463	chr13	76000000	76500000	1464	0.287094	85	37	2	0	20.331	8.33363	0.538823	0
1513	chr13	101000000	101500000	1514	0.264703	667	7	119	14	159.539	1.57663	32.06	4.2859
1351	chr13	20000000	20500000	1352	0.248744	16	4	73	6	3.82702	0.900933	19.667	1.83681
1501	chr13	95000000	95500000	1502	0.216254	35	7	257	2	8.3716	1.57663	69.2387	0.612271
1446	chr13	67500000	68000000	1447	0.209684	103	1	60	0	24.6364	0.225233	16.1647	0
1397	chr13	43000000	43500000	1398	0.207922	38	249	6	46	9.08916	56.0831	1.61647	14.0822
1417	chr13	53000000	53500000	1418	0.206151	49	933	384	350	11.7202	210.143	103.454	107.147
1508	chr13	98500000	99000000	1509	0.198322	3	365	110	8	0.717565	82.2101	29.6353	2.44908
1359	chr13	24000000	24500000	1360	0.176067	6	167	826	2	1.43513	37.6139	222.534	0.612271
1398	chr13	43500000	44000000	1399	0.171769	31	286	210	9	7.41484	64.4167	56.5764	2.75522
1517	chr13	103000000	103500000	1518	0.16682	9	120	89	5	2.1527	27.028	23.9776	1.53068
1535	chr13	112000000	112500000	1536	0.145976	6	2	299	4	1.43513	0.450466	80.554	1.22454
1399	chr13	44000000	44500000	1400	0.133981	83	0	74	23	19.8526	0	19.9364	7.04112
1431	chr13	60000000	60500000	1432	0.133277	13	6	21	13	3.10945	1.3514	5.65764	3.97976
1355	chr13	22000000	22500000	1356	0.108179	118	3	171	10	28.2242	0.6757	46.0694	3.06135
1502	chr13	95500000	96000000	1503	0.0844569	186	0	187	229	44.4891	0	50.3799	70.105
1506	chr13	97500000	98000000	1507	0.0255511	10	3	12	36	2.39188	0.6757	3.23294	11.0209
1503	chr13	96000000	96500000	1504	0.0170285	7	9	12	40	1.67432	2.0271	3.23294	12.2454
1470	chr13	79500000	80000000	1471	-0.00544568	2	20	10	8	0.478377	4.50466	2.69411	2.44908
1471	chr13	80000000	80500000	1472	-0.0246844	22	386	84	5	5.26215	86.94	22.6306	1.53068
1522	chr13	105500000	106000000	1523	-0.0479309	751	1	24	4	179.631	0.225233	6.46587	1.22454
1379	chr13	34000000	34500000	1380	-0.0481691	0	1	65	1906	0	0.225233	17.5117	583.494
1370	chr13	29500000	30000000	1371	-0.0727599	1	20	35	0	0.239188	4.50466	9.4294	0
1472	chr13	80500000	81000000	1473	-0.074899	135	176	4	10	32.2904	39.641	1.07765	3.06135
1462	chr13	75500000	76000000	1463	-0.0837916	120	7	5	1371	28.7026	1.57663	1.34706	419.712
1467	chr13	78000000	78500000	1468	-0.0902754	608	2112	341	7	145.427	475.692	91.8693	2.14295
1457	chr13	73000000	73500000	1458	-0.0947616	17	10	214	11	4.0662	2.25233	57.654	3.36749
1507	chr13	98000000	98500000	1508	-0.117769	22	9	549	5	5.26215	2.0271	147.907	1.53068
1473	chr13	81000000	81500000	1474	-0.119752	5	9	45	3	1.19594	2.0271	12.1235	0.918406
1465	chr13	77000000	77500000	1466	-0.120126	170	39	157	596	40.662	8.78409	42.2976	182.457
1407	chr13	48000000	48500000	1408	-0.128669	133	9	16	150	31.8121	2.0271	4.31058	45.9203
1536	chr13	112500000	113000000	1537	-0.165132	0	0	2	0	0	0	0.538823	0
1459	chr13	74000000	74500000	1460	-0.175142	12	21	88	5	2.87026	4.7299	23.7082	1.53068
1458	chr13	73500000	74000000	1459	-0.197239	10	2358	359	8	2.39188	531.1	96.7187	2.44908
1382	chr13	35500000	36000000	1383	-0.212807	2	554	29	472	0.478377	124.779	7.81293	144.496
1378	chr13	33500000	34000000	1379	-0.254782	375	7	83	3	89.6957	1.57663	22.3611	0.918406
1532	chr13	110500000	111000000	1533	-0.258832	2	5	64	33	0.478377	1.12617	17.2423	10.1025
1391	chr13	40000000	40500000	1392	-0.268428	1	1	84	0	0.239188	0.225233	22.6306	0
1485	chr13	87000000	87500000	1486	-0.279868	1	2	15	0	0.239188	0.450466	4.04117	0
1474	chr13	81500000	82000000	1475	-0.316774	45	0	12	5	10.7635	0	3.23294	1.53068
1385	chr13	37000000	37500000	1386	-0.325747	8	3	183	1475	1.91351	0.6757	49.3023	451.55
1445	chr13	67000000	67500000	1446	-0.342418	22	169	113	7	5.26215	38.0644	30.4435	2.14295
1469	chr13	79000000	79500000	1470	-0.347355	2	7	1	3	0.478377	1.57663	0.269411	0.918406
1438	chr13	63500000	64000000	1439	-0.362026	2	60	1	1	0.478377	13.514	0.269411	0.306135
1383	chr13	36000000	36500000	1384	-0.389613	497	4	5	1697	118.877	0.900933	1.34706	519.512
1357	chr13	23000000	23500000	1358	-0.39868	3	1835	489	3	0.717565	413.303	131.742	0.918406
1483	chr13	86000000	86500000	1484	-0.418273	3	3	0	0	0.717565	0.6757	0	0
1430	chr13	59500000	60000000	1431	-0.434573	160	27	4	0	38.2702	6.0813	1.07765	0
1350	chr13	19500000	20000000	1351	-0.436278	274	5	66	9	65.5376	1.12617	17.7812	2.75522
1358	chr13	23500000	24000000	1359	-0.439688	5	0	32	2	1.19594	0	8.62117	0.612271
1386	chr13	37500000	38000000	1387	-0.444735	918	180	228	45	219.575	40.542	61.4258	13.7761
1521	chr13	105000000	105500000	1522	-0.449401	17	5	5	2	4.0662	1.12617	1.34706	0.612271
1433	chr13	61000000	61500000	1434	-0.458888	114	1548	28	8	27.2675	348.661	7.54352	2.44908
1443	chr13	66000000	66500000	1444	-0.481452	0	2	3	1904	0	0.450466	0.808234	582.882
1480	chr13	84500000	85000000	1481	-0.486933	14	146	11	6	3.34864	32.884	2.96353	1.83681
1444	chr13	66500000	67000000	1445	-0.488183	11	4	12	14	2.63107	0.900933	3.23294	4.2859
1518	chr13	103500000	104000000	1519	-0.491469	5	624	6	1	1.19594	140.546	1.61647	0.306135
1486	chr13	87500000	88000000	1487	-0.498673	31	3	436	4	7.41484	0.6757	117.463	1.22454
1525	chr13	107000000	107500000	1526	-0.504971	4	8	9	0	0.956754	1.80187	2.4247	0
1390	chr13	39500000	40000000	1391	-0.521728	5	0	3	4	1.19594	0	0.808234	1.22454
1468	chr13	78500000	79000000	1469	-0.526183	5	26	71	18	1.19594	5.85606	19.1282	5.51044
1406	chr13	47500000	48000000	1407	-0.527363	6	42	20	9	1.43513	9.45979	5.38823	2.75522
1356	chr13	22500000	23000000	1357	-0.527389	29	98	474	0	6.93646	22.0729	127.701	0
1447	chr13	68000000	68500000	1448	-0.54454	243	29	13	10	58.1228	6.53176	3.50235	3.06135
1500	chr13	94500000	95000000	1501	-0.553327	44	60	32	1	10.5243	13.514	8.62117	0.306135
1442	chr13	65500000	66000000	1443	-0.568224	153	1	214	1	36.5958	0.225233	57.654	0.306135
1461	chr13	75000000	75500000	1462	-0.585002	42	7	140	2	10.0459	1.57663	37.7176	0.612271
1475	chr13	82000000	82500000	1476	-0.587674	4	1	4	6	0.956754	0.225233	1.07765	1.83681
1439	chr13	64000000	64500000	1440	-0.595323	7	5	3	0	1.67432	1.12617	0.808234	0
1487	chr13	88000000	88500000	1488	-0.598488	1	720	0	189	0.239188	162.168	0	57.8596
1528	chr13	108500000	109000000	1529	-0.602805	20	3	151	5	4.78377	0.6757	40.6811	1.53068
1441	chr13	65000000	65500000	1442	-0.604225	7	265	136	0	1.67432	59.6868	36.64	0
1531	chr13	110000000	110500000	1532	-0.605632	2	4	2	2905	0.478377	0.900933	0.538823	889.323
1384	chr13	36500000	37000000	1385	-0.607529	11	0	1	0	2.63107	0	0.269411	0
1523	chr13	106000000	106500000	1524	-0.608079	38	8	7	2	9.08916	1.80187	1.88588	0.612271
1514	chr13	101500000	102000000	1515	-0.611623	4	23	102	4	0.956754	5.18036	27.48	1.22454
1524	chr13	106500000	107000000	1525	-0.611797	18	786	181	1	4.30539	177.033	48.7635	0.306135
1490	chr13	89500000	90000000	1491	-0.611873	20	13	1	252	4.78377	2.92803	0.269411	77.1461
1418	chr13	53500000	54000000	1419	-0.619972	124	1	5	1	29.6594	0.225233	1.34706	0.306135
1381	chr13	35000000	35500000	1382	-0.622861	17	38	11	29	4.0662	8.55886	2.96353	8.87793
1380	chr13	34500000	35000000	1381	-0.62655	23	2	95	1	5.50133	0.450466	25.5941	0.306135
1437	chr13	63000000	63500000	1438	-0.628869	75	1	428	4	17.9391	0.225233	115.308	1.22454
1495	chr13	92000000	92500000	1496	-0.6395	7	24	150	4	1.67432	5.4056	40.4117	1.22454
1481	chr13	85000000	85500000	1482	-0.639823	432	2	341	2	103.329	0.450466	91.8693	0.612271
1440	chr13	64500000	65000000	1441	-0.640442	6	2	124	1	1.43513	0.450466	33.407	0.306135
1491	chr13	90000000	90500000	1492	-0.642525	0	4	140	1579	0	0.900933	37.7176	483.388
1488	chr13	88500000	89000000	1489	-0.643887	15	2	13	2	3.58783	0.450466	3.50235	0.612271
1530	chr13	109500000	110000000	1531	-0.645341	7	18	12	6	1.67432	4.0542	3.23294	1.83681
1482	chr13	85500000	86000000	1483	-0.648311	18	758	210	1	4.30539	170.727	56.5764	0.306135
1489	chr13	89000000	89500000	1490	-0.650623	3	0	47	3	0.717565	0	12.6623	0.918406
1494	chr13	91500000	92000000	1495	-0.653361	170	7	264	0	40.662	1.57663	71.1246	0
1479	chr13	84000000	84500000	1480	-0.661522	2	5	2	4	0.478377	1.12617	0.538823	1.22454
1476	chr13	82500000	83000000	1477	-0.686086	58	8	157	6	13.8729	1.80187	42.2976	1.83681
1451	chr13	70000000	70500000	1452	-0.70777	32	16	140	834	7.65403	3.60373	37.7176	255.317
1455	chr13	72000000	72500000	1456	-0.708696	21	56	226	3	5.02296	12.6131	60.887	0.918406
1450	chr13	69500000	70000000	1451	-0.710276	7	5	7	7	1.67432	1.12617	1.88588	2.14295
1477	chr13	83000000	83500000	1478	-0.719875	126	2	3	0	30.1377	0.450466	0.808234	0
1478	chr13	83500000	84000000	1479	-0.724588	11	1	2	4	2.63107	0.225233	0.538823	1.22454
1449	chr13	69000000	69500000	1450	-0.727838	464	32	59	0	110.983	7.20746	15.8953	0
1492	chr13	90500000	91000000	1493	-0.73299	7	13	5	7	1.67432	2.92803	1.34706	2.14295
1436	chr13	62500000	63000000	1437	-0.736965	2	11	59	1127	0.478377	2.47757	15.8953	345.015
1448	chr13	68500000	69000000	1449	-0.740443	140	174	8	5	33.4864	39.1906	2.15529	1.53068
1464	chr13	76500000	77000000	1465	-0.742823	3	3	56	4	0.717565	0.6757	15.087	1.22454
1456	chr13	72500000	73000000	1457	-0.750285	332	2	513	1	79.4106	0.450466	138.208	0.306135
1427	chr13	58000000	58500000	1428	-0.751776	626	151	594	638	149.732	34.0102	160.03	195.314
1453	chr13	71000000	71500000	1454	-0.754762	0	2	105	360	0	0.450466	28.2882	110.209
1516	chr13	102500000	103000000	1517	-0.757074	0	1	1	2	0	0.225233	0.269411	0.612271
1454	chr13	71500000	72000000	1455	-0.770307	7	65	0	1	1.67432	14.6402	0	0.306135
1493	chr13	91000000	91500000	1494	-0.784487	195	9	4	0	46.6417	2.0271	1.07765	0
1429	chr13	59000000	59500000	1430	-0.784629	6	10	7	3	1.43513	2.25233	1.88588	0.918406
1428	chr13	58500000	59000000	1429	-0.786749	4	0	8	40	0.956754	0	2.15529	12.2454
1452	chr13	70500000	71000000	1453	-0.788304	34	1	15	2	8.13241	0.225233	4.04117	0.612271
1526	chr13	107500000	108000000	1527	-0.791558	2	1	59	0	0.478377	0.225233	15.8953	0
1422	chr13	55500000	56000000	1423	-0.807011	0	0	76	0	0	0	20.4753	0
1424	chr13	56500000	57000000	1425	-0.812226	0	2	15	3	0	0.450466	4.04117	0.918406
1504	chr13	96500000	97000000	1505	-0.814387	5	15	13	46	1.19594	3.3785	3.50235	14.0822
1389	chr13	39000000	39500000	1390	-0.828335	10	641	125	1	2.39188	144.374	33.6764	0.306135
1426	chr13	57500000	58000000	1427	-0.831684	23	17	13	13	5.50133	3.82896	3.50235	3.97976
1529	chr13	109000000	109500000	1530	-0.832026	120	475	196	116	28.7026	106.986	52.8046	35.5117
1498	chr13	93500000	94000000	1499	-0.840525	0	9	2	22	0	2.0271	0.538823	6.73498
1425	chr13	57000000	57500000	1426	-0.84121	7	6	38	11	1.67432	1.3514	10.2376	3.36749
1519	chr13	104000000	104500000	1520	-0.861944	34	2	49	0	8.13241	0.450466	13.2012	0
1520	chr13	104500000	105000000	1521	-0.866171	7	10	16	1	1.67432	2.25233	4.31058	0.306135
1421	chr13	55000000	55500000	1422	-0.868883	69	1	1	200	16.504	0.225233	0.269411	61.2271
1423	chr13	56000000	56500000	1424	-0.870982	24	3	147	2	5.74052	0.6757	39.6035	0.612271
1434	chr13	61500000	62000000	1435	-0.885269	29	451	38	4	6.93646	101.58	10.2376	1.22454
1420	chr13	54500000	55000000	1421	-0.892516	2	3	58	3	0.478377	0.6757	15.6259	0.918406
1388	chr13	38500000	39000000	1389	-0.898747	40	6	74	743	9.56754	1.3514	19.9364	227.459
1499	chr13	94000000	94500000	1500	-0.900121	1	750	126	4	0.239188	168.925	33.9458	1.22454
1419	chr13	54000000	54500000	1420	-0.924492	1	17	1	0	0.239188	3.82896	0.269411	0
1515	chr13	102000000	102500000	1516	-0.925114	2	10	40	146	0.478377	2.25233	10.7765	44.6958
1497	chr13	93000000	93500000	1498	-0.925896	4	1118	2	14	0.956754	251.811	0.538823	4.2859
1496	chr13	92500000	93000000	1497	-0.929247	13	21	509	35	3.10945	4.7299	137.13	10.7147
1387	chr13	38000000	38500000	1388	-0.93574	408	0	2	1	97.5889	0	0.538823	0.306135
1435	chr13	62000000	62500000	1436	-0.937232	4	5	214	62	0.956754	1.12617	57.654	18.9804
1527	chr13	108000000	108500000	1528	-0.960268	3	0	8	5	0.717565	0	2.15529	1.53068
1505	chr13	97000000	97500000	1506	-0.967226	2	1088	22	4	0.478377	245.054	5.92705	1.22454
1588	chr14	23000000	23500000	1589	0.651605	455	809	450	6	108.831	182.214	121.235	1.83681
1725	chr14	91500000	92000000	1726	0.645798	111	206	981	223	26.5499	46.398	264.293	68.2682
1690	chr14	74000000	74500000	1691	0.625795	1334	8	249	28	319.077	1.80187	67.0834	8.57179
1591	chr14	24500000	25000000	1592	0.625126	857	23	543	523	204.984	5.18036	146.29	160.109
1741	chr14	99500000	100000000	1742	0.550336	109	7	92	4	26.0715	1.57663	24.7859	1.22454
1692	chr14	75000000	75500000	1693	0.611058	405	199	586	85	96.8713	44.8214	157.875	26.0215
1755	chr14	106500000	107000000	1756	0.540233	440	3	619	1169	105.243	0.6757	166.766	357.872
1693	chr14	75500000	76000000	1694	0.601737	49	0	222	703	11.7202	0	59.8093	215.213
1688	chr14	73000000	73500000	1689	0.594085	27	2121	15	2	6.45809	477.72	4.04117	0.612271
1743	chr14	100500000	101000000	1744	0.592489	3	7	272	41	0.717565	1.57663	73.2799	12.5516
1689	chr14	73500000	74000000	1690	0.591409	209	1	264	4	49.9904	0.225233	71.1246	1.22454
1585	chr14	21500000	22000000	1586	0.588937	544	2	33	157	130.119	0.450466	8.89058	48.0633
1728	chr14	93000000	93500000	1729	0.5846	40	701	48	0	9.56754	157.888	12.9317	0
1612	chr14	35000000	35500000	1613	0.581565	209	1944	133	1142	49.9904	437.853	35.8317	349.607
1739	chr14	98500000	99000000	1740	0.580951	637	747	697	2	152.363	168.249	187.78	0.612271
1672	chr14	65000000	65500000	1673	0.416613	6	5	1	86	1.43513	1.12617	0.269411	26.3276
1747	chr14	102500000	103000000	1748	0.571434	497	5	168	15	118.877	1.12617	45.2611	4.59203
1691	chr14	74500000	75000000	1692	0.56099	330	156	1	418	78.9322	35.1364	0.269411	127.965
1748	chr14	103000000	103500000	1749	0.551769	765	52	619	1	182.979	11.7121	166.766	0.306135
1750	chr14	104000000	104500000	1751	0.549841	867	851	551	7	207.376	191.673	148.446	2.14295
1727	chr14	92500000	93000000	1728	0.547379	345	35	9	3	82.52	7.88316	2.4247	0.918406
1589	chr14	23500000	24000000	1590	0.546054	832	647	594	1309	199.005	145.726	160.03	400.731
1684	chr14	71000000	71500000	1685	0.5396	10	5	6	2	2.39188	1.12617	1.61647	0.612271
1740	chr14	99000000	99500000	1741	0.539263	873	1	99	1	208.812	0.225233	26.6717	0.306135
1756	chr14	107000000	107349540	1757	0.536128	334	2205	1229	1	79.8889	496.639	331.107	0.306135
1613	chr14	35500000	36000000	1614	0.53536	131	568	197	109	31.3337	127.932	53.0741	33.3688
1738	chr14	98000000	98500000	1739	0.533505	264	9	514	11	63.1457	2.0271	138.477	3.36749
1742	chr14	100000000	100500000	1743	0.525802	15	8	271	50	3.58783	1.80187	73.0105	15.3068
1753	chr14	105500000	106000000	1754	0.520545	0	0	140	268	0	0	37.7176	82.0443
1746	chr14	102000000	102500000	1747	0.518786	1217	15	46	12	291.092	3.3785	12.3929	3.67363
1749	chr14	103500000	104000000	1750	0.51383	761	2	491	7	182.022	0.450466	132.281	2.14295
1726	chr14	92000000	92500000	1727	0.513089	2	1861	153	1	0.478377	419.159	41.2199	0.306135
1694	chr14	76000000	76500000	1695	0.506566	12	25	114	51	2.87026	5.63083	30.7129	15.6129
1736	chr14	97000000	97500000	1737	0.50123	385	0	176	27	92.0876	0	47.4164	8.26566
1752	chr14	105000000	105500000	1753	0.496058	15	1	620	0	3.58783	0.225233	167.035	0
1685	chr14	71500000	72000000	1686	0.491778	154	1231	85	102	36.835	277.262	22.9	31.2258
1733	chr14	95500000	96000000	1734	0.486945	5	1151	325	103	1.19594	259.243	87.5587	31.532
1697	chr14	77500000	78000000	1698	0.482277	72	2	10	1	17.2216	0.450466	2.69411	0.306135
1653	chr14	55500000	56000000	1654	0.47831	1065	182	376	2962	254.736	40.9924	101.299	906.773
1673	chr14	65500000	66000000	1674	0.463685	278	1	4	0	66.4944	0.225233	1.07765	0
1696	chr14	77000000	77500000	1697	0.459387	4	11	66	6	0.956754	2.47757	17.7812	1.83681
1681	chr14	69500000	70000000	1682	0.447884	37	0	405	5	8.84997	0	109.112	1.53068
1648	chr14	53000000	53500000	1649	0.447683	388	0	862	43	92.8051	0	232.233	13.1638
1754	chr14	106000000	106500000	1755	0.445897	1	8	909	2	0.239188	1.80187	244.895	0.612271
1682	chr14	70000000	70500000	1683	0.441897	107	0	821	7	25.5932	0	221.187	2.14295
1643	chr14	50500000	51000000	1644	0.439682	2	436	20	2	0.478377	98.2017	5.38823	0.612271
1737	chr14	97500000	98000000	1738	0.426406	1	1816	2	5	0.239188	409.023	0.538823	1.53068
1671	chr14	64500000	65000000	1672	0.418074	318	188	60	10	76.0619	42.3438	16.1647	3.06135
1678	chr14	68000000	68500000	1679	0.413289	71	2032	12	0	16.9824	457.674	3.23294	0
1724	chr14	91000000	91500000	1725	0.410039	1456	1	30	2	348.258	0.225233	8.08234	0.612271
1751	chr14	104500000	105000000	1752	0.408819	782	3	3	9	187.045	0.6757	0.808234	2.75522
1674	chr14	66000000	66500000	1675	0.405298	281	6	190	505	67.212	1.3514	51.1882	154.598
1647	chr14	52500000	53000000	1648	0.400758	198	18	31	1085	47.3593	4.0542	8.35175	332.157
1687	chr14	72500000	73000000	1688	0.397099	389	1	293	3	93.0443	0.225233	78.9375	0.918406
1683	chr14	70500000	71000000	1684	0.38882	156	355	135	1	37.3134	79.9578	36.3705	0.306135
1686	chr14	72000000	72500000	1687	0.388781	299	591	77	1561	71.5173	133.113	20.7447	477.877
1642	chr14	50000000	50500000	1643	0.378509	479	0	398	259	114.571	0	107.226	79.2891
1735	chr14	96500000	97000000	1736	0.366557	855	0	2	0	204.506	0	0.538823	0
1680	chr14	69000000	69500000	1681	0.361339	34	1	435	2	8.13241	0.225233	117.194	0.612271
1652	chr14	55000000	55500000	1653	0.343633	449	30	95	0	107.396	6.757	25.5941	0
1644	chr14	51000000	51500000	1645	0.342409	165	1	150	392	39.4661	0.225233	40.4117	120.005
1677	chr14	67500000	68000000	1678	0.340587	1	152	652	321	0.239188	34.2354	175.656	98.2695
1670	chr14	64000000	64500000	1671	0.338382	28	1	788	0	6.69728	0.225233	212.296	0
1744	chr14	101000000	101500000	1745	0.328715	11	4	38	132	2.63107	0.900933	10.2376	40.4099
1614	chr14	36000000	36500000	1615	0.313406	82	11	290	0	19.6135	2.47757	78.1293	0
1745	chr14	101500000	102000000	1746	0.30997	70	9	91	615	16.7432	2.0271	24.5164	188.273
1586	chr14	22000000	22500000	1587	0.301487	221	851	113	855	52.8606	191.673	30.4435	261.746
1605	chr14	31500000	32000000	1606	0.294427	221	2	285	1	52.8606	0.450466	76.7823	0.306135
1663	chr14	60500000	61000000	1664	0.289645	440	216	39	3	105.243	48.6504	10.507	0.918406
1695	chr14	76500000	77000000	1696	0.286077	1	0	140	0	0.239188	0	37.7176	0
1732	chr14	95000000	95500000	1733	0.284466	105	0	1	2	25.1148	0	0.269411	0.612271
1723	chr14	90500000	91000000	1724	0.283086	211	12	225	7	50.4688	2.7028	60.6176	2.14295
1722	chr14	90000000	90500000	1723	0.274171	324	55	208	3	77.4971	12.3878	56.0376	0.918406
1729	chr14	93500000	94000000	1730	0.268705	212	664	167	8	50.7079	149.555	44.9917	2.44908
1654	chr14	56000000	56500000	1655	0.256858	20	2	75	90	4.78377	0.450466	20.2059	27.5522
1655	chr14	56500000	57000000	1656	0.252037	12	51	1102	29	2.87026	11.4869	296.891	8.87793
1679	chr14	68500000	69000000	1680	0.249386	349	2	58	13	83.4768	0.450466	15.6259	3.97976
1698	chr14	78000000	78500000	1699	0.243913	519	1850	266	5	124.139	416.681	71.6634	1.53068
1664	chr14	61000000	61500000	1665	0.243775	44	203	358	5	10.5243	45.7223	96.4493	1.53068
1734	chr14	96000000	96500000	1735	0.23377	51	0	144	2	12.1986	0	38.7952	0.612271
1590	chr14	24000000	24500000	1591	0.22581	27	64	176	781	6.45809	14.4149	47.4164	239.092
1646	chr14	52000000	52500000	1647	0.217716	117	254	315	546	27.985	57.2092	84.8646	167.15
1665	chr14	61500000	62000000	1666	0.205714	2	3	319	4	0.478377	0.6757	85.9422	1.22454
1649	chr14	53500000	54000000	1650	0.20411	10	8	548	74	2.39188	1.80187	147.637	22.654
1721	chr14	89500000	90000000	1722	0.203681	120	10	8	1	28.7026	2.25233	2.15529	0.306135
1659	chr14	58500000	59000000	1660	0.191848	7	653	413	381	1.67432	147.077	111.267	116.638
1584	chr14	21000000	21500000	1585	0.144862	53	6	24	633	12.677	1.3514	6.46587	193.784
1651	chr14	54500000	55000000	1652	0.14176	25	8	374	222	5.97971	1.80187	100.76	67.9621
1676	chr14	67000000	67500000	1677	0.10029	1	202	487	15	0.239188	45.4971	131.203	4.59203
1645	chr14	51500000	52000000	1646	0.0907202	1	1	170	0	0.239188	0.225233	45.7999	0
1604	chr14	31000000	31500000	1605	0.0728777	157	54	55	98	37.5526	12.1626	14.8176	30.0013
1720	chr14	89000000	89500000	1721	0.0702092	0	736	430	2	0	165.772	115.847	0.612271
1731	chr14	94500000	95000000	1732	0.066933	383	512	64	1	91.6092	115.319	17.2423	0.306135
1675	chr14	66500000	67000000	1676	0.0662467	13	4	29	72	3.10945	0.900933	7.81293	22.0418
1621	chr14	39500000	40000000	1622	-0.0443569	2	2073	124	1	0.478377	466.908	33.407	0.306135
1666	chr14	62000000	62500000	1667	-0.0482858	449	5	179	3	107.396	1.12617	48.2246	0.918406
1730	chr14	94000000	94500000	1731	-0.0559951	287	4	182	2	68.6471	0.900933	49.0329	0.612271
1705	chr14	81500000	82000000	1706	-0.0679125	645	1310	2	6	154.277	295.055	0.538823	1.83681
1657	chr14	57500000	58000000	1658	-0.0845186	157	3	108	3	37.5526	0.6757	29.0964	0.918406
1704	chr14	81000000	81500000	1705	-0.154317	643	1	309	0	153.798	0.225233	83.2481	0
1606	chr14	32000000	32500000	1607	-0.172015	11	6	132	34	2.63107	1.3514	35.5623	10.4086
1607	chr14	32500000	33000000	1608	-0.17581	680	431	177	8	162.648	97.0755	47.6858	2.44908
1650	chr14	54000000	54500000	1651	-0.180084	0	19	142	1	0	4.27943	38.2564	0.306135
1661	chr14	59500000	60000000	1662	-0.196469	63	3	22	0	15.0689	0.6757	5.92705	0
1583	chr14	20500000	21000000	1584	-0.204077	564	11	11	17	134.902	2.47757	2.96353	5.2043
1592	chr14	25000000	25500000	1593	-0.235889	1087	11	252	137	259.998	2.47757	67.8917	41.9406
1611	chr14	34500000	35000000	1612	-0.276226	253	493	3	0	60.5147	111.04	0.808234	0
1656	chr14	57000000	57500000	1657	-0.312003	5	2957	6	0	1.19594	666.015	1.61647	0
1699	chr14	78500000	79000000	1700	-0.337259	153	3	3	4	36.5958	0.6757	0.808234	1.22454
1669	chr14	63500000	64000000	1670	-0.416133	11	3	233	3	2.63107	0.6757	62.7729	0.918406
1615	chr14	36500000	37000000	1616	-0.455713	8	15	17	1510	1.91351	3.3785	4.57999	462.265
1662	chr14	60000000	60500000	1663	-0.466803	365	191	54	22	87.3038	43.0195	14.5482	6.73498
1633	chr14	45500000	46000000	1634	-0.47279	8	6	128	14	1.91351	1.3514	34.4847	4.2859
1719	chr14	88500000	89000000	1720	-0.484911	504	9	149	4	120.551	2.0271	40.1423	1.22454
1616	chr14	37000000	37500000	1617	-0.49723	321	3	267	178	76.7795	0.6757	71.9329	54.4921
1658	chr14	58000000	58500000	1659	-0.505034	72	23	127	5	17.2216	5.18036	34.2153	1.53068
1660	chr14	59000000	59500000	1661	-0.599005	6	1	1	1	1.43513	0.225233	0.269411	0.306135
1632	chr14	45000000	45500000	1633	-0.648603	11	26	230	99	2.63107	5.85606	61.9646	30.3074
1610	chr14	34000000	34500000	1611	-0.698632	2	85	173	3	0.478377	19.1448	46.6082	0.918406
1667	chr14	62500000	63000000	1668	-0.764861	5	137	13	9	1.19594	30.8569	3.50235	2.75522
1622	chr14	40000000	40500000	1623	-0.777067	6	4	54	7	1.43513	0.900933	14.5482	2.14295
1641	chr14	49500000	50000000	1642	-0.821537	11	1068	50	449	2.63107	240.549	13.4706	137.455
1700	chr14	79000000	79500000	1701	-0.829516	291	2	5	10	69.6038	0.450466	1.34706	3.06135
1620	chr14	39000000	39500000	1621	-0.872472	700	1497	64	2	167.432	337.174	17.2423	0.612271
1703	chr14	80500000	81000000	1704	-0.895784	8	0	20	8	1.91351	0	5.38823	2.44908
1608	chr14	33000000	33500000	1609	-0.900084	3	1	11	0	0.717565	0.225233	2.96353	0
1603	chr14	30500000	31000000	1604	-0.95079	3	81	4	11	0.717565	18.2439	1.07765	3.36749
1630	chr14	44000000	44500000	1631	-0.958805	1	15	88	2	0.239188	3.3785	23.7082	0.612271
1629	chr14	43500000	44000000	1630	-0.972183	15	92	7	728	3.58783	20.7215	1.88588	222.867
1623	chr14	40500000	41000000	1624	-0.976388	18	9	17	6	4.30539	2.0271	4.57999	1.83681
1593	chr14	25500000	26000000	1594	-0.981985	135	74	130	22	32.2904	16.6673	35.0235	6.73498
1625	chr14	41500000	42000000	1626	-0.983977	106	4	92	9	25.354	0.900933	24.7859	2.75522
1718	chr14	88000000	88500000	1719	-0.988052	8	3	113	6	1.91351	0.6757	30.4435	1.83681
1706	chr14	82000000	82500000	1707	-0.999829	85	4	5	8	20.331	0.900933	1.34706	2.44908
1631	chr14	44500000	45000000	1632	-1.00359	529	4	30	6	126.531	0.900933	8.08234	1.83681
1627	chr14	42500000	43000000	1628	-1.00597	10	5	6	21	2.39188	1.12617	1.61647	6.42884
1626	chr14	42000000	42500000	1627	-1.00671	23	3	40	9	5.50133	0.6757	10.7765	2.75522
1628	chr14	43000000	43500000	1629	-1.00844	7	10	4	3	1.67432	2.25233	1.07765	0.918406
1624	chr14	41000000	41500000	1625	-1.01973	92	31	2	22	22.0053	6.98223	0.538823	6.73498
1714	chr14	86000000	86500000	1715	-1.05258	44	26	7	6	10.5243	5.85606	1.88588	1.83681
1596	chr14	27000000	27500000	1597	-1.0666	300	3	437	827	71.7565	0.6757	117.733	253.174
1711	chr14	84500000	85000000	1712	-1.07128	2	290	22	1	0.478377	65.3176	5.92705	0.306135
1710	chr14	84000000	84500000	1711	-1.07136	51	5	14	5	12.1986	1.12617	3.77176	1.53068
1594	chr14	26000000	26500000	1595	-1.08164	17	13	1102	69	4.0662	2.92803	296.891	21.1233
1595	chr14	26500000	27000000	1596	-1.08905	11	1442	11	3	2.63107	324.786	2.96353	0.918406
1713	chr14	85500000	86000000	1714	-1.10182	53	2	1	2	12.677	0.450466	0.269411	0.612271
1609	chr14	33500000	34000000	1610	-1.11188	7	3	13	30	1.67432	0.6757	3.50235	9.18406
1638	chr14	48000000	48500000	1639	-1.12156	10	5	10	1	2.39188	1.12617	2.69411	0.306135
1668	chr14	63000000	63500000	1669	-1.13572	27	16	21	7	6.45809	3.60373	5.65764	2.14295
1712	chr14	85000000	85500000	1713	-1.13658	18	1	1	1	4.30539	0.225233	0.269411	0.306135
1637	chr14	47500000	48000000	1638	-1.14448	3	641	0	4	0.717565	144.374	0	1.22454
1709	chr14	83500000	84000000	1710	-1.15614	28	0	0	221	6.69728	0	0	67.6559
1639	chr14	48500000	49000000	1640	-1.16793	118	964	57	9	28.2242	217.125	15.3565	2.75522
1634	chr14	46000000	46500000	1635	-1.17942	40	31	39	6	9.56754	6.98223	10.507	1.83681
1617	chr14	37500000	38000000	1618	-1.1828	32	5	20	14	7.65403	1.12617	5.38823	4.2859
1636	chr14	47000000	47500000	1637	-1.1829	0	5	4	924	0	1.12617	1.07765	282.869
1702	chr14	80000000	80500000	1703	-1.18604	3	7	84	1	0.717565	1.57663	22.6306	0.306135
1640	chr14	49000000	49500000	1641	-1.19316	14	47	190	1	3.34864	10.586	51.1882	0.306135
1635	chr14	46500000	47000000	1636	-1.20667	12	28	129	19	2.87026	6.30653	34.7541	5.81657
1598	chr14	28000000	28500000	1599	-1.21499	19	6	4	4	4.54458	1.3514	1.07765	1.22454
1600	chr14	29000000	29500000	1601	-1.21525	5	5	70	5	1.19594	1.12617	18.8588	1.53068
1708	chr14	83000000	83500000	1709	-1.22632	32	2	13	578	7.65403	0.450466	3.50235	176.946
1715	chr14	86500000	87000000	1716	-1.22801	115	2	45	3	27.5067	0.450466	12.1235	0.918406
1619	chr14	38500000	39000000	1620	-1.24761	5	0	419	1	1.19594	0	112.883	0.306135
1602	chr14	30000000	30500000	1603	-1.24995	4	113	76	7	0.956754	25.4514	20.4753	2.14295
1597	chr14	27500000	28000000	1598	-1.25208	15	414	310	627	3.58783	93.2465	83.5175	191.947
1599	chr14	28500000	29000000	1600	-1.26058	84	859	157	9	20.0918	193.475	42.2976	2.75522
1707	chr14	82500000	83000000	1708	-1.26257	7	2	21	55	1.67432	0.450466	5.65764	16.8374
1618	chr14	38000000	38500000	1619	-1.26727	52	8	62	4	12.4378	1.80187	16.7035	1.22454
1601	chr14	29500000	30000000	1602	-1.28676	46	97	45	26	11.0027	21.8476	12.1235	7.95952
1701	chr14	79500000	80000000	1702	-1.28861	14	11	28	63	3.34864	2.47757	7.54352	19.2865
1716	chr14	87000000	87500000	1717	-1.35161	1	5	10	7	0.239188	1.12617	2.69411	2.14295
1717	chr14	87500000	88000000	1718	-1.40495	13	9	20	45	3.10945	2.0271	5.38823	13.7761
1582	chr14	20000000	20500000	1583	-1.44565	94	60	29	85	22.4837	13.514	7.81293	26.0215
1938	chr15	90500000	91000000	1939	0.756173	478	6	417	125	114.332	1.3514	112.345	38.2669
1840	chr15	41500000	42000000	1841	0.741693	2034	492	124	76	486.509	110.815	33.407	23.2663
1839	chr15	41000000	41500000	1840	0.717922	277	0	48	0	66.2552	0	12.9317	0
1838	chr15	40500000	41000000	1839	0.710697	1528	2991	266	0	365.48	673.672	71.6634	0
1844	chr15	43500000	44000000	1845	0.702784	646	184	166	80	154.516	41.4429	44.7223	24.4908
1939	chr15	91000000	91500000	1940	0.684567	697	22	209	418	166.714	4.95513	56.307	127.965
1927	chr15	85000000	85500000	1928	0.681475	63	454	45	0	15.0689	102.256	12.1235	0
1908	chr15	75500000	76000000	1909	0.673694	1322	1548	336	7	316.207	348.661	90.5222	2.14295
1906	chr15	74500000	75000000	1907	0.657479	90	2404	720	89	21.527	541.461	193.976	27.2461
1907	chr15	75000000	75500000	1908	0.656083	155	4787	143	1	37.0742	1078.19	38.5258	0.306135
1842	chr15	42500000	43000000	1843	0.650364	480	527	1028	1424	114.81	118.698	276.955	435.937
1886	chr15	64500000	65000000	1887	0.643597	22	4	992	109	5.26215	0.900933	267.256	33.3688
1843	chr15	43000000	43500000	1844	0.635839	506	501	325	2	121.029	112.842	87.5587	0.612271
1914	chr15	78500000	79000000	1915	0.627044	0	1186	46	1698	0	267.127	12.3929	519.818
1887	chr15	65000000	65500000	1888	0.624231	12	186	416	0	2.87026	41.8934	112.075	0
1937	chr15	90000000	90500000	1938	0.614293	967	2192	218	0	231.295	493.711	58.7317	0
1888	chr15	65500000	66000000	1889	0.590158	80	12	403	81	19.1351	2.7028	108.573	24.797
1885	chr15	64000000	64500000	1886	0.589484	202	9	327	1261	48.3161	2.0271	88.0975	386.037
1890	chr15	66500000	67000000	1891	0.567182	44	2102	799	54	10.5243	473.44	215.26	16.5313
1874	chr15	58500000	59000000	1875	0.566316	425	42	19	106	101.655	9.45979	5.11882	32.4504
1841	chr15	42000000	42500000	1842	0.640511	0	852	49	0	0	191.899	13.2012	0
1837	chr15	40000000	40500000	1838	0.556063	305	1290	505	19	72.9525	290.551	136.053	5.81657
1936	chr15	89500000	90000000	1937	0.554088	732	1	451	59	175.086	0.225233	121.505	18.062
1915	chr15	79000000	79500000	1916	0.3105	4	975	430	336	0.956754	219.602	115.847	102.862
1910	chr15	76500000	77000000	1911	0.30833	6	192	328	962	1.43513	43.2448	88.3669	294.502
1893	chr15	68000000	68500000	1894	0.54194	132	1	232	2	31.5729	0.225233	62.5035	0.612271
1895	chr15	69000000	69500000	1896	-0.00186469	4	1151	441	5	0.956754	259.243	118.81	1.53068
1884	chr15	63500000	64000000	1885	0.535312	130	1443	547	2359	31.0945	325.011	147.368	722.174
1831	chr15	37000000	37500000	1832	-0.789333	5	3	217	0	1.19594	0.6757	58.4623	0
1889	chr15	66000000	66500000	1890	0.529236	5	350	731	8	1.19594	78.8316	196.94	2.44908
1923	chr15	83000000	83500000	1924	0.521425	48	676	277	140	11.481	152.258	74.627	42.859
1905	chr15	74000000	74500000	1906	0.515197	230	2	623	0	55.0133	0.450466	167.843	0
1913	chr15	78000000	78500000	1914	0.508152	315	749	143	10	75.3444	168.7	38.5258	3.06135
1902	chr15	72500000	73000000	1903	0.50402	172	41	198	1	41.1404	9.23456	53.3435	0.306135
1846	chr15	44500000	45000000	1847	0.501837	23	8	238	5	5.50133	1.80187	64.1199	1.53068
1911	chr15	77000000	77500000	1912	0.4853	20	113	315	49	4.78377	25.4514	84.8646	15.0006
1891	chr15	67000000	67500000	1892	0.483969	95	356	348	3	22.7229	80.183	93.7552	0.918406
1875	chr15	59000000	59500000	1876	0.479891	180	257	776	0	43.0539	57.8849	209.063	0
1892	chr15	67500000	68000000	1893	0.452308	194	2182	121	70	46.4026	491.459	32.5988	21.4295
1909	chr15	76000000	76500000	1910	0.435934	872	7	60	27	208.572	1.57663	16.1647	8.26566
1928	chr15	85500000	86000000	1929	0.426318	230	0	202	504	55.0133	0	54.4211	154.292
1877	chr15	60000000	60500000	1878	0.408538	2	1464	688	2	0.478377	329.741	185.355	0.612271
1912	chr15	77500000	78000000	1913	0.360949	126	460	109	1	30.1377	103.607	29.3658	0.306135
1845	chr15	44000000	44500000	1846	0.342878	590	5	640	1191	141.121	1.12617	172.423	364.607
1924	chr15	83500000	84000000	1925	0.326177	104	58	515	408	24.8756	13.0635	138.747	124.903
1847	chr15	45000000	45500000	1848	0.325869	2	6	328	54	0.478377	1.3514	88.3669	16.5313
1861	chr15	52000000	52500000	1862	0.301757	234	2	53	70	55.9701	0.450466	14.2788	21.4295
1871	chr15	57000000	57500000	1872	0.301064	109	55	924	5	26.0715	12.3878	248.936	1.53068
1858	chr15	50500000	51000000	1859	0.25986	69	3	218	87	16.504	0.6757	58.7317	26.6338
1898	chr15	70500000	71000000	1899	0.252093	120	12	90	3	28.7026	2.7028	24.247	0.918406
1820	chr15	31500000	32000000	1821	0.229992	605	1507	21	2	144.709	339.426	5.65764	0.612271
1876	chr15	59500000	60000000	1877	0.210355	76	9	361	344	18.1783	2.0271	97.2575	105.311
1917	chr15	80000000	80500000	1918	0.208864	738	70	266	5	176.521	15.7663	71.6634	1.53068
1904	chr15	73500000	74000000	1905	0.203565	197	2	240	15	47.1201	0.450466	64.6587	4.59203
1878	chr15	60500000	61000000	1879	0.203518	104	2	583	35	24.8756	0.450466	157.067	10.7147
1929	chr15	86000000	86500000	1930	0.20014	733	808	340	0	175.325	181.988	91.5999	0
1903	chr15	73000000	73500000	1904	0.196295	3	8	557	1381	0.717565	1.80187	150.062	422.773
1836	chr15	39500000	40000000	1837	0.190146	2	1	72	2	0.478377	0.225233	19.3976	0.612271
1881	chr15	62000000	62500000	1882	0.186651	52	370	603	158	12.4378	83.3363	162.455	48.3694
1957	chr15	100000000	100500000	1958	0.182765	36	7	87	128	8.61078	1.57663	23.4388	39.1853
1870	chr15	56500000	57000000	1871	0.173666	60	7	209	588	14.3513	1.57663	56.307	180.008
1883	chr15	63000000	63500000	1884	0.168883	6	1	78	5	1.43513	0.225233	21.0141	1.53068
1819	chr15	31000000	31500000	1820	0.160874	621	13	390	9	148.536	2.92803	105.07	2.75522
1882	chr15	62500000	63000000	1883	0.153593	9	0	13	1080	2.1527	0	3.50235	330.626
1855	chr15	49000000	49500000	1856	0.148685	6	5	93	749	1.43513	1.12617	25.0553	229.295
1956	chr15	99500000	100000000	1957	0.137539	115	0	0	0	27.5067	0	0	0
1901	chr15	72000000	72500000	1902	0.107561	160	207	71	35	38.2702	46.6233	19.1282	10.7147
1897	chr15	70000000	70500000	1898	0.0979254	145	1585	284	24	34.6823	356.995	76.5128	7.34725
1955	chr15	99000000	99500000	1956	0.0875462	1068	2	174	2	255.453	0.450466	46.8776	0.612271
1894	chr15	68500000	69000000	1895	0.0847391	182	1	239	226	43.5323	0.225233	64.3893	69.1866
1896	chr15	69500000	70000000	1897	0.0804143	497	8	492	2	118.877	1.80187	132.55	0.612271
1873	chr15	58000000	58500000	1874	0.0791089	933	58	262	9	223.163	13.0635	70.5858	2.75522
1935	chr15	89000000	89500000	1936	0.0408742	847	4	13	166	202.593	0.900933	3.50235	50.8185
1960	chr15	101500000	102000000	1961	0.0209659	3	1	481	584	0.717565	0.225233	129.587	178.783
1860	chr15	51500000	52000000	1861	0.0165407	45	13	758	1432	10.7635	2.92803	204.214	438.386
1813	chr15	28000000	28500000	1814	0.0074375	0	9	397	239	0	2.0271	106.956	73.1664
1944	chr15	93500000	94000000	1945	-0.0049743	596	8	3	1	142.556	1.80187	0.808234	0.306135
1834	chr15	38500000	39000000	1835	-0.00996871	503	4	460	13	120.312	0.900933	123.929	3.97976
1859	chr15	51000000	51500000	1860	-0.0112033	99	7	138	291	23.6797	1.57663	37.1788	89.0854
1812	chr15	27500000	28000000	1813	-0.0125687	241	3	100	16	57.6444	0.6757	26.9411	4.89817
1872	chr15	57500000	58000000	1873	-0.023439	68	139	291	6	16.2648	31.3074	78.3987	1.83681
1848	chr15	45500000	46000000	1849	-0.0297849	155	567	4	483	37.0742	127.707	1.07765	147.863
1807	chr15	25000000	25500000	1808	-0.0339512	1	19	167	1674	0.239188	4.27943	44.9917	512.471
1916	chr15	79500000	80000000	1917	-0.0485543	62	4	499	82	14.8297	0.900933	134.436	25.1031
1862	chr15	52500000	53000000	1863	-0.0818787	24	0	4	1	5.74052	0	1.07765	0.306135
1815	chr15	29000000	29500000	1816	-0.0917418	412	6	128	10	98.5456	1.3514	34.4847	3.06135
1919	chr15	81000000	81500000	1920	-0.100651	1	3	446	665	0.239188	0.6757	120.157	203.58
1806	chr15	24500000	25000000	1807	-0.109172	100	0	57	4	23.9188	0	15.3565	1.22454
1879	chr15	61000000	61500000	1880	-0.112163	60	7	40	10	14.3513	1.57663	10.7765	3.06135
1940	chr15	91500000	92000000	1941	-0.150015	24	34	295	924	5.74052	7.65793	79.4764	282.869
1958	chr15	100500000	101000000	1959	-0.158546	12	1464	204	1	2.87026	329.741	54.9599	0.306135
1920	chr15	81500000	82000000	1921	-0.177004	48	17	621	0	11.481	3.82896	167.304	0
1943	chr15	93000000	93500000	1944	-0.187975	247	2	164	0	59.0795	0.450466	44.1835	0
1926	chr15	84500000	85000000	1927	-0.220467	107	30	166	475	25.5932	6.757	44.7223	145.414
1826	chr15	34500000	35000000	1827	-0.222427	60	5	233	3	14.3513	1.12617	62.7729	0.918406
1932	chr15	87500000	88000000	1933	-0.224445	69	4	42	9	16.504	0.900933	11.3153	2.75522
1921	chr15	82000000	82500000	1922	-0.23617	142	127	5	64	33.9648	28.6046	1.34706	19.5927
1808	chr15	25500000	26000000	1809	-0.239619	85	1649	37	107	20.331	371.41	9.96822	32.7565
1854	chr15	48500000	49000000	1855	-0.266043	282	6	3	8	67.4511	1.3514	0.808234	2.44908
1961	chr15	102000000	102500000	1962	-0.311432	464	1351	251	206	110.983	304.29	67.6223	63.0639
1934	chr15	88500000	89000000	1935	-0.329168	10	3	175	2	2.39188	0.6757	47.147	0.612271
1899	chr15	71000000	71500000	1900	-0.33043	26	56	7	3	6.2189	12.6131	1.88588	0.918406
1930	chr15	86500000	87000000	1931	-0.3728	1	1	92	3	0.239188	0.225233	24.7859	0.918406
1856	chr15	49500000	50000000	1857	-0.383341	6	86	2	29	1.43513	19.3701	0.538823	8.87793
1959	chr15	101000000	101500000	1960	-0.387126	2	19	377	0	0.478377	4.27943	101.568	0
1835	chr15	39000000	39500000	1836	-0.390561	818	10	17	3	195.656	2.25233	4.57999	0.918406
1918	chr15	80500000	81000000	1919	-0.392899	540	1611	34	0	129.162	362.851	9.15999	0
1825	chr15	34000000	34500000	1826	-0.403476	8	15	91	4	1.91351	3.3785	24.5164	1.22454
1869	chr15	56000000	56500000	1870	-0.441246	775	18	53	0	185.371	4.0542	14.2788	0
1925	chr15	84000000	84500000	1926	-0.448071	50	4	30	723	11.9594	0.900933	8.08234	221.336
1933	chr15	88000000	88500000	1934	-0.460021	143	6	79	2	34.2039	1.3514	21.2835	0.612271
1802	chr15	22500000	23000000	1803	-0.493145	1	32	115	0	0.239188	7.20746	30.9823	0
1868	chr15	55500000	56000000	1869	-0.500549	32	10	107	19	7.65403	2.25233	28.827	5.81657
1804	chr15	23500000	24000000	1805	-0.506333	1094	7	3	83	261.672	1.57663	0.808234	25.4092
1900	chr15	71500000	72000000	1901	-0.520217	222	12	459	439	53.0998	2.7028	123.66	134.393
1821	chr15	32000000	32500000	1822	-0.52449	306	682	6	3	73.1917	153.609	1.61647	0.918406
1857	chr15	50000000	50500000	1858	-0.553996	273	303	254	1	65.2984	68.2457	68.4305	0.306135
1805	chr15	24000000	24500000	1806	-0.568927	0	6	1	1	0	1.3514	0.269411	0.306135
1827	chr15	35000000	35500000	1828	-0.577245	0	0	62	7	0	0	16.7035	2.14295
1931	chr15	87000000	87500000	1932	-0.58857	7	17	23	11	1.67432	3.82896	6.19646	3.36749
1941	chr15	92000000	92500000	1942	-0.611781	85	1008	430	3	20.331	227.035	115.847	0.918406
1950	chr15	96500000	97000000	1951	-0.616585	4	2	88	1	0.956754	0.450466	23.7082	0.306135
1880	chr15	61500000	62000000	1881	-0.617873	0	168	0	0	0	37.8392	0	0
1942	chr15	92500000	93000000	1943	-0.627908	25	1431	34	58	5.97971	322.309	9.15999	17.7559
1849	chr15	46000000	46500000	1850	-0.649995	17	669	29	8	4.0662	150.681	7.81293	2.44908
1811	chr15	27000000	27500000	1812	-0.651379	369	213	410	2	88.2605	47.9747	110.459	0.612271
1946	chr15	94500000	95000000	1947	-0.674604	5	1	4	74	1.19594	0.225233	1.07765	22.654
1949	chr15	96000000	96500000	1950	-0.704479	653	1	7	0	156.19	0.225233	1.88588	0
1954	chr15	98500000	99000000	1955	-0.717912	94	3	3	5	22.4837	0.6757	0.808234	1.53068
1945	chr15	94000000	94500000	1946	-0.743062	2	7	213	1165	0.478377	1.57663	57.3846	356.648
1809	chr15	26000000	26500000	1810	-0.745262	565	4	4	1	135.141	0.900933	1.07765	0.306135
1833	chr15	38000000	38500000	1834	-0.775767	33	3	1	2	7.89322	0.6757	0.269411	0.612271
1810	chr15	26500000	27000000	1811	-0.806557	280	5	1	0	66.9728	1.12617	0.269411	0
1823	chr15	33000000	33500000	1824	-0.823427	460	0	233	601	110.027	0	62.7729	183.987
1853	chr15	48000000	48500000	1854	-0.827311	44	43	104	1	10.5243	9.68503	28.0188	0.306135
1828	chr15	35500000	36000000	1829	-0.877476	1	88	8	52	0.239188	19.8205	2.15529	15.919
1830	chr15	36500000	37000000	1831	-0.878178	61	20	10	1	14.5905	4.50466	2.69411	0.306135
1951	chr15	97000000	97500000	1952	-0.910523	0	0	21	0	0	0	5.65764	0
1852	chr15	47500000	48000000	1853	-0.911715	194	2	12	2	46.4026	0.450466	3.23294	0.612271
1948	chr15	95500000	96000000	1949	-0.944437	427	176	56	920	102.133	39.641	15.087	281.645
1824	chr15	33500000	34000000	1825	-0.958808	4	24	4	24	0.956754	5.4056	1.07765	7.34725
1816	chr15	29500000	30000000	1817	-0.975884	0	34	121	0	0	7.65793	32.5988	0
1947	chr15	95000000	95500000	1948	-0.994407	34	0	63	1565	8.13241	0	16.9729	479.102
1817	chr15	30000000	30500000	1818	-1.02414	106	604	5	25	25.354	136.041	1.34706	7.65339
1952	chr15	97500000	98000000	1953	-1.04186	19	30	46	11	4.54458	6.757	12.3929	3.36749
1863	chr15	53000000	53500000	1864	-1.05581	329	714	12	22	78.693	160.816	3.23294	6.73498
1829	chr15	36000000	36500000	1830	-1.07498	349	7	5	2	83.4768	1.57663	1.34706	0.612271
1953	chr15	98000000	98500000	1954	-1.07806	8	7	16	10	1.91351	1.57663	4.31058	3.06135
1850	chr15	46500000	47000000	1851	-1.11397	524	2241	206	25	125.335	504.748	55.4988	7.65339
1851	chr15	47000000	47500000	1852	-1.11979	12	23	37	2	2.87026	5.18036	9.96822	0.612271
1832	chr15	37500000	38000000	1833	-1.14065	22	20	150	25	5.26215	4.50466	40.4117	7.65339
1867	chr15	55000000	55500000	1868	-1.17108	18	20	24	23	4.30539	4.50466	6.46587	7.04112
1865	chr15	54000000	54500000	1866	-1.26534	7	12	20	7	1.67432	2.7028	5.38823	2.14295
1864	chr15	53500000	54000000	1865	-1.29918	5	17	12	3	1.19594	3.82896	3.23294	0.918406
1866	chr15	54500000	55000000	1867	-1.34001	1169	2	6	130	279.611	0.450466	1.61647	39.7976
1963	chr16	0	500000	1964	0.629057	447	1903	156	2	106.917	428.619	42.0282	0.612271
1964	chr16	500000	1000000	1965	0.608087	239	19	74	0	57.166	4.27943	19.9364	0
1965	chr16	1000000	1500000	1966	0.550258	2	0	31	0	0.478377	0	8.35175	0
1966	chr16	1500000	2000000	1967	0.624287	173	4	291	3	41.3796	0.900933	78.3987	0.918406
1967	chr16	2000000	2500000	1968	0.668163	66	0	0	1	15.7864	0	0	0.306135
1968	chr16	2500000	3000000	1969	0.701461	299	1	183	1973	71.5173	0.225233	49.3023	604.005
1969	chr16	3000000	3500000	1970	0.72144	1586	124	80	371	379.353	27.9289	21.5529	113.576
1970	chr16	3500000	4000000	1971	0.597203	53	0	298	304	12.677	0	80.2846	93.0652
1971	chr16	4000000	4500000	1972	0.490796	460	0	119	1642	110.027	0	32.06	502.674
1972	chr16	4500000	5000000	1973	0.617733	129	628	183	425	30.8553	141.446	49.3023	130.108
1973	chr16	5000000	5500000	1974	-0.582663	6	7	92	1	1.43513	1.57663	24.7859	0.306135
1974	chr16	5500000	6000000	1975	-1.21932	4	6	0	271	0.956754	1.3514	0	82.9627
1975	chr16	6000000	6500000	1976	-1.39109	63	44	200	3	15.0689	9.91026	53.8823	0.918406
1976	chr16	6500000	7000000	1977	-1.29844	54	10	24	0	12.9162	2.25233	6.46587	0
1977	chr16	7000000	7500000	1978	-1.35766	19	188	70	1	4.54458	42.3438	18.8588	0.306135
1978	chr16	7500000	8000000	1979	-1.37583	0	0	9	0	0	0	2.4247	0
1979	chr16	8000000	8500000	1980	-1.21021	5	3	335	4	1.19594	0.6757	90.2528	1.22454
1980	chr16	8500000	9000000	1981	-0.110982	0	0	194	0	0	0	52.2658	0
1981	chr16	9000000	9500000	1982	-0.189773	0	476	108	0	0	107.211	29.0964	0
1982	chr16	9500000	10000000	1983	-1.10394	17	14	49	54	4.0662	3.15326	13.2012	16.5313
1983	chr16	10000000	10500000	1984	-0.746269	4	4	338	437	0.956754	0.900933	91.0611	133.781
1984	chr16	10500000	11000000	1985	-0.483752	54	463	262	2	12.9162	104.283	70.5858	0.612271
1985	chr16	11000000	11500000	1986	0.27102	206	1	10	9	49.2728	0.225233	2.69411	2.75522
1986	chr16	11500000	12000000	1987	0.377388	373	573	33	696	89.2173	129.059	8.89058	213.07
1987	chr16	12000000	12500000	1988	0.205132	61	9	302	64	14.5905	2.0271	81.3623	19.5927
1988	chr16	12500000	13000000	1989	0.184186	8	246	412	563	1.91351	55.4074	110.998	172.354
1989	chr16	13000000	13500000	1990	-0.535337	3	8	10	2583	0.717565	1.80187	2.69411	790.748
1990	chr16	13500000	14000000	1991	-0.737469	2	248	125	1477	0.478377	55.8578	33.6764	452.162
1991	chr16	14000000	14500000	1992	0.0796981	341	11	495	2	81.5633	2.47757	133.359	0.612271
1992	chr16	14500000	15000000	1993	0.39427	623	5	368	21	149.014	1.12617	99.1434	6.42884
1994	chr16	15500000	16000000	1995	0.446892	442	697	870	30	105.721	156.988	234.388	9.18406
1995	chr16	16000000	16500000	1996	0.582609	313	5	629	29	74.866	1.12617	169.46	8.87793
1997	chr16	17000000	17500000	1998	-0.0836473	186	2	7	0	44.4891	0.450466	1.88588	0
1998	chr16	17500000	18000000	1999	-0.357746	53	231	73	5	12.677	52.0289	19.667	1.53068
2001	chr16	19000000	19500000	2002	-0.333111	618	790	729	0	147.818	177.934	196.401	0
2002	chr16	19500000	20000000	2003	-0.18571	2	5	297	48	0.478377	1.12617	80.0152	14.6945
2003	chr16	20000000	20500000	2004	-0.967527	411	202	90	51	98.3065	45.4971	24.247	15.6129
2004	chr16	20500000	21000000	2005	-0.209209	0	7	3	1	0	1.57663	0.808234	0.306135
2005	chr16	21000000	21500000	2006	0.123828	500	20	203	7	119.594	4.50466	54.6905	2.14295
2006	chr16	21500000	22000000	2007	0.521324	170	0	677	256	40.662	0	182.392	78.3707
2007	chr16	22000000	22500000	2008	0.550345	475	7	268	359	113.615	1.57663	72.2023	109.903
2008	chr16	22500000	23000000	2009	-0.0520819	171	1009	297	5	40.9012	227.26	80.0152	1.53068
2009	chr16	23000000	23500000	2010	0.0511929	191	19	108	9	45.685	4.27943	29.0964	2.75522
2010	chr16	23500000	24000000	2011	0.394149	626	1	168	1	149.732	0.225233	45.2611	0.306135
2011	chr16	24000000	24500000	2012	-0.28528	2	2	24	3	0.478377	0.450466	6.46587	0.918406
2012	chr16	24500000	25000000	2013	0.0357419	423	4	319	3	101.177	0.900933	85.9422	0.918406
2013	chr16	25000000	25500000	2014	-0.0738753	69	2	79	0	16.504	0.450466	21.2835	0
2014	chr16	25500000	26000000	2015	-0.921769	4	487	177	9	0.956754	109.689	47.6858	2.75522
2015	chr16	26000000	26500000	2016	-1.10997	38	14	3	1125	9.08916	3.15326	0.808234	344.402
2016	chr16	26500000	27000000	2017	-0.977225	0	1	0	0	0	0.225233	0	0
2017	chr16	27000000	27500000	2018	0.053318	35	1538	3	0	8.3716	346.409	0.808234	0
2018	chr16	27500000	28000000	2019	-0.08491	10	111	320	5	2.39188	25.0009	86.2117	1.53068
2019	chr16	28000000	28500000	2020	0.423267	274	57	553	296	65.5376	12.8383	148.985	90.6161
2020	chr16	28500000	29000000	2021	0.791471	260	540	507	0	62.189	121.626	136.592	0
2022	chr16	29500000	30000000	2023	0.798354	113	5	308	236	27.0283	1.12617	82.9787	72.248
2023	chr16	30000000	30500000	2024	0.792138	2560	60	568	4	612.322	13.514	153.026	1.22454
2024	chr16	30500000	31000000	2025	0.740341	75	579	513	911	17.9391	130.41	138.208	278.889
2025	chr16	31000000	31500000	2026	0.31189	203	2018	18	415	48.5553	454.521	4.84941	127.046
2026	chr16	31500000	32000000	2027	-0.00208146	24	30	47	13	5.74052	6.757	12.6623	3.97976
2030	chr16	33500000	34000000	2031	-0.325831	18	7	66	3	4.30539	1.57663	17.7812	0.918406
2055	chr16	46000000	46500000	2056	-0.0035917	2	26	33	1	0.478377	5.85606	8.89058	0.306135
2056	chr16	46500000	47000000	2057	0.101458	54	6	52	594	12.9162	1.3514	14.0094	181.844
2057	chr16	47000000	47500000	2058	0.12194	7	6	25	5	1.67432	1.3514	6.73529	1.53068
2058	chr16	47500000	48000000	2059	-0.2646	341	740	130	14	81.5633	166.673	35.0235	4.2859
2059	chr16	48000000	48500000	2060	-0.151076	157	2	177	440	37.5526	0.450466	47.6858	134.7
2060	chr16	48500000	49000000	2061	-0.773421	10	1376	138	6	2.39188	309.921	37.1788	1.83681
2061	chr16	49000000	49500000	2062	-1.10765	6	15	111	11	1.43513	3.3785	29.9047	3.36749
2062	chr16	49500000	50000000	2063	-0.559346	704	3	109	1	168.389	0.6757	29.3658	0.306135
2063	chr16	50000000	50500000	2064	0.081751	2	1212	8	1311	0.478377	272.983	2.15529	401.344
2064	chr16	50500000	51000000	2065	-0.664871	444	0	1	34	106.2	0	0.269411	10.4086
2065	chr16	51000000	51500000	2066	-1.38345	46	41	59	72	11.0027	9.23456	15.8953	22.0418
2066	chr16	51500000	52000000	2067	-1.38491	186	2	28	13	44.4891	0.450466	7.54352	3.97976
2067	chr16	52000000	52500000	2068	-1.31287	371	619	220	2	88.7389	139.419	59.2705	0.612271
2068	chr16	52500000	53000000	2069	-1.2815	11	1264	137	1	2.63107	284.695	36.9094	0.306135
2069	chr16	53000000	53500000	2070	-0.168587	360	20	492	5	86.1078	4.50466	132.55	1.53068
2070	chr16	53500000	54000000	2071	0.138438	798	1273	160	667	190.872	286.722	43.1058	204.192
2071	chr16	54000000	54500000	2072	0.350221	466	8	364	144	111.462	1.80187	98.0658	44.0835
2072	chr16	54500000	55000000	2073	0.270956	583	7	753	286	139.447	1.57663	202.867	87.5547
2073	chr16	55000000	55500000	2074	-0.497674	56	0	68	2	13.3946	0	18.32	0.612271
2074	chr16	55500000	56000000	2075	-0.924331	199	102	3	24	47.5985	22.9738	0.808234	7.34725
2075	chr16	56000000	56500000	2076	-0.571643	5	17	36	4	1.19594	3.82896	9.69881	1.22454
2076	chr16	56500000	57000000	2077	0.208379	362	22	701	374	86.5862	4.95513	188.857	114.495
2077	chr16	57000000	57500000	2078	0.425792	483	5	463	0	115.528	1.12617	124.737	0
2078	chr16	57500000	58000000	2079	0.299277	1	5	180	2	0.239188	1.12617	48.4941	0.612271
2079	chr16	58000000	58500000	2080	0.0292568	60	6	108	12	14.3513	1.3514	29.0964	3.67363
2080	chr16	58500000	59000000	2081	-0.287633	294	851	206	4	70.3214	191.673	55.4988	1.22454
2081	chr16	59000000	59500000	2082	-0.926111	726	42	9	24	173.651	9.45979	2.4247	7.34725
2082	chr16	59500000	60000000	2083	-0.919671	104	14	24	32	24.8756	3.15326	6.46587	9.79633
2083	chr16	60000000	60500000	2084	-0.86572	67	2479	9	3	16.0256	558.353	2.4247	0.918406
2084	chr16	60500000	61000000	2085	-0.808232	1	3	5	7	0.239188	0.6757	1.34706	2.14295
2085	chr16	61000000	61500000	2086	-0.795619	1	8	221	380	0.239188	1.80187	59.5399	116.331
2086	chr16	61500000	62000000	2087	-0.760087	3	0	15	1130	0.717565	0	4.04117	345.933
2087	chr16	62000000	62500000	2088	-0.70564	0	1	472	0	0	0.225233	127.162	0
2088	chr16	62500000	63000000	2089	-0.679873	2	137	208	13	0.478377	30.8569	56.0376	3.97976
2089	chr16	63000000	63500000	2090	-0.696558	10	25	43	9	2.39188	5.63083	11.5847	2.75522
2090	chr16	63500000	64000000	2091	-0.705835	4	89	3	13	0.956754	20.0458	0.808234	3.97976
2091	chr16	64000000	64500000	2092	-0.749736	0	1	198	1	0	0.225233	53.3435	0.306135
2092	chr16	64500000	65000000	2093	-0.877105	6	4	23	7	1.43513	0.900933	6.19646	2.14295
2093	chr16	65000000	65500000	2094	-1.11091	543	679	217	6	129.879	152.933	58.4623	1.83681
2094	chr16	65500000	66000000	2095	-1.3023	37	2084	8	8	8.84997	469.386	2.15529	2.44908
2095	chr16	66000000	66500000	2096	-0.90106	305	4	74	6	72.9525	0.900933	19.9364	1.83681
2096	chr16	66500000	67000000	2097	0.472352	746	2482	209	0	178.435	559.029	56.307	0
2097	chr16	67000000	67500000	2098	0.768945	456	342	89	0	109.07	77.0298	23.9776	0
2098	chr16	67500000	68000000	2099	0.787298	720	300	11	643	172.216	67.57	2.96353	196.845
2099	chr16	68000000	68500000	2100	0.708152	971	34	394	3	232.252	7.65793	106.148	0.918406
2100	chr16	68500000	69000000	2101	0.352112	3	1599	11	6	0.717565	360.148	2.96353	1.83681
2101	chr16	69000000	69500000	2102	0.525378	598	6	49	5	143.035	1.3514	13.2012	1.53068
2102	chr16	69500000	70000000	2103	0.481982	1503	540	73	556	359.5	121.626	19.667	170.211
2103	chr16	70000000	70500000	2104	0.623441	17	95	710	94	4.0662	21.3972	191.282	28.7767
2104	chr16	70500000	71000000	2105	0.461389	137	1806	55	94	32.7688	406.771	14.8176	28.7767
2105	chr16	71000000	71500000	2106	0.184072	771	21	176	462	184.414	4.7299	47.4164	141.435
2106	chr16	71500000	72000000	2107	0.351383	18	1106	646	117	4.30539	249.108	174.04	35.8178
2107	chr16	72000000	72500000	2108	-0.0442012	135	3	455	6	32.2904	0.6757	122.582	1.83681
2108	chr16	72500000	73000000	2109	-0.0884454	16	1187	22	1776	3.82702	267.352	5.92705	543.697
2109	chr16	73000000	73500000	2110	-0.300602	471	1	135	2264	112.658	0.225233	36.3705	693.091
2110	chr16	73500000	74000000	2111	-0.660491	358	1	14	966	85.6295	0.225233	3.77176	295.727
2111	chr16	74000000	74500000	2112	-0.109942	34	1555	419	1	8.13241	350.238	112.883	0.306135
2112	chr16	74500000	75000000	2113	0.453999	52	11	201	60	12.4378	2.47757	54.1517	18.3681
2113	chr16	75000000	75500000	2114	0.289413	188	2	428	670	44.9674	0.450466	115.308	205.111
2114	chr16	75500000	76000000	2115	-0.228142	4	433	52	1912	0.956754	97.526	14.0094	585.331
2115	chr16	76000000	76500000	2116	-1.02534	3	2	112	4	0.717565	0.450466	30.1741	1.22454
2116	chr16	76500000	77000000	2117	-1.01821	96	4	9	16	22.9621	0.900933	2.4247	4.89817
2117	chr16	77000000	77500000	2118	-0.715567	8	28	48	5	1.91351	6.30653	12.9317	1.53068
2118	chr16	77500000	78000000	2119	-0.828188	113	1	343	3	27.0283	0.225233	92.4081	0.918406
2119	chr16	78000000	78500000	2120	-0.287063	1	225	1	468	0.239188	50.6775	0.269411	143.271
2120	chr16	78500000	79000000	2121	-0.305173	376	48	30	27	89.9349	10.8112	8.08234	8.26566
2121	chr16	79000000	79500000	2122	-0.0489525	109	2	5	10	26.0715	0.450466	1.34706	3.06135
2122	chr16	79500000	80000000	2123	-0.601341	0	0	3	0	0	0	0.808234	0
2123	chr16	80000000	80500000	2124	-1.00287	8	8	9	1	1.91351	1.80187	2.4247	0.306135
2124	chr16	80500000	81000000	2125	-0.753459	483	4	6	8	115.528	0.900933	1.61647	2.44908
2125	chr16	81000000	81500000	2126	-0.00967958	3	167	72	13	0.717565	37.6139	19.3976	3.97976
2126	chr16	81500000	82000000	2127	-0.0217821	37	1	43	0	8.84997	0.225233	11.5847	0
2127	chr16	82000000	82500000	2128	-0.761086	69	3	1	45	16.504	0.6757	0.269411	13.7761
2128	chr16	82500000	83000000	2129	-1.13461	348	0	289	0	83.2376	0	77.8599	0
2129	chr16	83000000	83500000	2130	-1.43627	3	126	253	1	0.717565	28.3794	68.1611	0.306135
2130	chr16	83500000	84000000	2131	-0.988887	14	786	49	1	3.34864	177.033	13.2012	0.306135
2131	chr16	84000000	84500000	2132	-0.0108518	471	0	428	976	112.658	0	115.308	298.788
2132	chr16	84500000	85000000	2133	0.208146	28	407	438	6	6.69728	91.6699	118.002	1.83681
2133	chr16	85000000	85500000	2134	0.170273	49	10	285	1	11.7202	2.25233	76.7823	0.306135
2134	chr16	85500000	86000000	2135	0.284535	837	4	321	0	200.201	0.900933	86.4811	0
2135	chr16	86000000	86500000	2136	-0.675074	312	1	226	2	74.6268	0.225233	60.887	0.612271
2136	chr16	86500000	87000000	2137	-0.756765	92	1	1	0	22.0053	0.225233	0.269411	0
2137	chr16	87000000	87500000	2138	-0.159215	0	1	0	1	0	0.225233	0	0.306135
2138	chr16	87500000	88000000	2139	0.497337	655	6	557	776	156.668	1.3514	150.062	237.561
2139	chr16	88000000	88500000	2140	0.169904	230	0	0	564	55.0133	0	0	172.66
2140	chr16	88500000	89000000	2141	0.674754	1	0	0	3	0.239188	0	0	0.918406
2141	chr16	89000000	89500000	2142	0.675459	817	0	326	556	195.417	0	87.8281	170.211
2142	chr16	89500000	90000000	2143	0.727767	238	0	456	57	56.9268	0	122.852	17.4497
2291	chr17	73500000	74000000	2292	0.876298	107	179	168	670	25.5932	40.3167	45.2611	205.111
2290	chr17	73000000	73500000	2291	0.853638	1182	1	25	104	282.721	0.225233	6.73529	31.8381
2198	chr17	27000000	27500000	2199	0.838604	149	2	351	109	35.6391	0.450466	94.5634	33.3688
2158	chr17	7000000	7500000	2159	0.824758	262	179	39	1	62.6674	40.3167	10.507	0.306135
2292	chr17	74000000	74500000	2293	0.800713	465	1492	228	327	111.223	336.048	61.4258	100.106
2180	chr17	18000000	18500000	2181	0.788715	616	330	182	1895	147.34	74.327	49.0329	580.127
2304	chr17	80000000	80500000	2305	0.748416	96	1421	577	2	22.9621	320.056	155.45	0.612271
2159	chr17	7500000	8000000	2160	0.731904	230	251	24	0	55.0133	56.5335	6.46587	0
2225	chr17	40500000	41000000	2226	0.716243	239	1	8	0	57.166	0.225233	2.15529	0
2228	chr17	42000000	42500000	2229	0.715315	379	0	238	199	90.6524	0	64.1199	60.921
2303	chr17	79500000	80000000	2304	0.714561	157	3	160	1	37.5526	0.6757	43.1058	0.306135
2230	chr17	43000000	43500000	2231	0.708974	454	5	531	1	108.592	1.12617	143.057	0.306135
2217	chr17	36500000	37000000	2218	0.708966	412	15	266	96	98.5456	3.3785	71.6634	29.389
2160	chr17	8000000	8500000	2161	0.707686	228	21	413	1042	54.535	4.7299	111.267	318.993
2220	chr17	38000000	38500000	2221	0.69378	1210	5	252	154	289.418	1.12617	67.8917	47.1449
2224	chr17	40000000	40500000	2225	0.69178	985	1008	400	231	235.601	227.035	107.765	70.7173
2219	chr17	37500000	38000000	2220	0.661578	41	0	366	77	9.80673	0	98.6046	23.5724
2218	chr17	37000000	37500000	2219	0.659707	6	0	485	0	1.43513	0	130.665	0
2229	chr17	42500000	43000000	2230	0.657788	1128	1710	724	22	269.805	385.149	195.054	6.73498
2179	chr17	17500000	18000000	2180	0.656389	537	632	189	185	128.444	142.347	50.9188	56.6351
2302	chr17	79000000	79500000	2303	0.651927	196	0	174	0	46.8809	0	46.8776	0
2293	chr17	74500000	75000000	2294	0.645747	222	720	254	1822	53.0998	162.168	68.4305	557.779
2199	chr17	27500000	28000000	2200	0.629189	145	5	464	1583	34.6823	1.12617	125.007	484.612
2152	chr17	4000000	4500000	2153	0.626204	926	593	119	0	221.488	133.563	32.06	0
2178	chr17	17000000	17500000	2179	0.624868	279	145	430	296	66.7336	32.6588	115.847	90.6161
2153	chr17	4500000	5000000	2154	0.619541	536	1	185	0	128.205	0.225233	49.8411	0
2305	chr17	80500000	81000000	2306	0.597126	911	4	347	4	217.901	0.900933	93.4858	1.22454
2294	chr17	75000000	75500000	2295	0.595639	206	388	13	22	49.2728	87.3905	3.50235	6.73498
2147	chr17	1500000	2000000	2148	0.590952	83	183	758	2	19.8526	41.2177	204.214	0.612271
2181	chr17	18500000	19000000	2182	0.57119	681	6	12	36	162.887	1.3514	3.23294	11.0209
2268	chr17	62000000	62500000	2269	0.569655	306	4	229	2490	73.1917	0.900933	61.6952	762.277
2176	chr17	16000000	16500000	2177	0.568929	761	341	252	2	182.022	76.8045	67.8917	0.612271
2301	chr17	78500000	79000000	2302	0.555433	87	749	1301	0	20.8094	168.7	350.504	0
2239	chr17	47500000	48000000	2240	0.552508	704	2036	85	0	168.389	458.575	22.9	0
2151	chr17	3500000	4000000	2152	0.550474	0	1	335	9	0	0.225233	90.2528	2.75522
2201	chr17	28500000	29000000	2202	0.5498	1323	336	440	1255	316.446	75.6784	118.541	384.2
2296	chr17	76000000	76500000	2297	0.54906	445	2	223	1171	106.439	0.450466	60.0787	358.485
2235	chr17	45500000	46000000	2236	0.54301	95	1571	266	35	22.7229	353.841	71.6634	10.7147
2240	chr17	48000000	48500000	2241	0.53852	1	0	31	3	0.239188	0	8.35175	0.918406
2148	chr17	2000000	2500000	2149	0.537417	420	151	709	1157	100.459	34.0102	191.013	354.199
2297	chr17	76500000	77000000	2298	0.533733	250	40	650	19	59.7971	9.00933	175.117	5.81657
2211	chr17	33500000	34000000	2212	0.531944	676	119	927	157	161.691	26.8027	249.744	48.0633
2269	chr17	62500000	63000000	2270	0.51647	587	1219	922	230	140.404	274.559	248.397	70.4112
2215	chr17	35500000	36000000	2216	0.514354	2200	1	1192	2665	526.215	0.225233	321.138	815.851
2295	chr17	75500000	76000000	2296	0.512073	939	3	601	0	224.598	0.6757	161.916	0
2300	chr17	78000000	78500000	2301	0.511871	1072	0	797	1	256.41	0	214.721	0.306135
2146	chr17	1000000	1500000	2147	0.505445	497	2	4	750	118.877	0.450466	1.07765	229.602
2202	chr17	29000000	29500000	2203	0.493239	141	37	150	771	33.7256	8.33363	40.4117	236.03
2256	chr17	56000000	56500000	2257	0.487473	102	6	23	1	24.3972	1.3514	6.19646	0.306135
2238	chr17	47000000	47500000	2239	0.479528	1	5	433	14	0.239188	1.12617	116.655	4.2859
2267	chr17	61500000	62000000	2268	0.476759	1187	242	113	6	283.917	54.5064	30.4435	1.83681
2259	chr17	57500000	58000000	2260	0.442619	58	227	91	968	13.8729	51.1279	24.5164	296.339
2226	chr17	41000000	41500000	2227	0.462946	161	7	85	1624	38.5093	1.57663	22.9	497.164
2216	chr17	36000000	36500000	2217	0.455879	45	0	24	2	10.7635	0	6.46587	0.612271
2241	chr17	48500000	49000000	2242	0.372049	5	4	8	84	1.19594	0.900933	2.15529	25.7154
2246	chr17	51000000	51500000	2247	-1.055	0	1	23	0	0	0.225233	6.19646	0
2204	chr17	30000000	30500000	2205	0.40733	915	3019	78	426	218.857	679.979	21.0141	130.414
2237	chr17	46500000	47000000	2238	0.40184	251	388	212	6	60.0363	87.3905	57.1152	1.83681
2258	chr17	57000000	57500000	2259	0.395159	40	1556	344	437	9.56754	350.463	92.6775	133.781
2157	chr17	6500000	7000000	2158	0.384451	484	157	24	11	115.767	35.3616	6.46587	3.36749
2200	chr17	28000000	28500000	2201	0.380326	1280	248	36	2048	306.161	55.8578	9.69881	626.965
2177	chr17	16500000	17000000	2178	0.37998	199	7	615	1187	47.5985	1.57663	165.688	363.383
2203	chr17	29500000	30000000	2204	0.363806	293	13	88	151	70.0822	2.92803	23.7082	46.2265
2236	chr17	46000000	46500000	2237	0.361891	41	109	94	15	9.80673	24.5504	25.3247	4.59203
2145	chr17	500000	1000000	2146	0.358093	153	100	424	107	36.5958	22.5233	114.23	32.7565
2154	chr17	5000000	5500000	2155	0.356901	117	1376	779	49	27.985	309.921	209.872	15.0006
2260	chr17	58000000	58500000	2261	0.352653	781	0	403	1371	186.806	0	108.573	419.712
2257	chr17	56500000	57000000	2258	0.349967	43	2	869	4	10.2851	0.450466	234.119	1.22454
2299	chr17	77500000	78000000	2300	0.349839	0	756	35	2	0	170.276	9.4294	0.612271
2234	chr17	45000000	45500000	2235	0.347173	94	7	117	260	22.4837	1.57663	31.5211	79.5952
2197	chr17	26500000	27000000	2198	0.335103	590	0	46	2	141.121	0	12.3929	0.612271
2149	chr17	2500000	3000000	2150	0.330331	0	88	115	233	0	19.8205	30.9823	71.3296
2289	chr17	72500000	73000000	2290	0.327832	1001	9	178	4	239.428	2.0271	47.9552	1.22454
2205	chr17	30500000	31000000	2206	0.298274	17	0	738	0	4.0662	0	198.826	0
2175	chr17	15500000	16000000	2176	0.27862	172	0	142	0	41.1404	0	38.2564	0
2212	chr17	34000000	34500000	2213	0.2757	11	489	353	1016	2.63107	110.139	95.1022	311.034
2276	chr17	66000000	66500000	2277	0.258353	0	142	281	0	0	31.9831	75.7046	0
2221	chr17	38500000	39000000	2222	0.23376	426	2024	667	0	101.894	455.872	179.697	0
2161	chr17	8500000	9000000	2162	0.224084	43	2531	398	425	10.2851	570.065	107.226	130.108
2214	chr17	35000000	35500000	2215	0.192006	696	0	62	2	166.475	0	16.7035	0.612271
2261	chr17	58500000	59000000	2262	0.181142	579	837	131	174	138.49	188.52	35.2929	53.2676
2275	chr17	65500000	66000000	2276	0.178943	347	72	302	550	82.9984	16.2168	81.3623	168.374
2227	chr17	41500000	42000000	2228	0.173251	71	17	15	116	16.9824	3.82896	4.04117	35.5117
2254	chr17	55000000	55500000	2255	0.139266	132	0	414	0	31.5729	0	111.536	0
2270	chr17	63000000	63500000	2271	0.13791	331	1027	926	95	79.1714	231.314	249.475	29.0829
2144	chr17	0	500000	2145	0.127845	0	18	45	4	0	4.0542	12.1235	1.22454
2263	chr17	59500000	60000000	2264	0.0851803	39	225	100	3	9.32835	50.6775	26.9411	0.918406
2255	chr17	55500000	56000000	2256	0.0656713	6	10	377	6	1.43513	2.25233	101.568	1.83681
2274	chr17	65000000	65500000	2275	0.0326545	124	432	124	136	29.6594	97.3007	33.407	41.6344
2265	chr17	60500000	61000000	2266	-0.00305542	110	411	637	4	26.3107	92.5708	171.615	1.22454
2264	chr17	60000000	60500000	2265	-0.0257093	244	534	151	16	58.362	120.275	40.6811	4.89817
2272	chr17	64000000	64500000	2273	-0.047838	636	10	74	206	152.124	2.25233	19.9364	63.0639
2210	chr17	33000000	33500000	2211	-0.0499069	686	566	42	5	164.083	127.482	11.3153	1.53068
2253	chr17	54500000	55000000	2254	-0.0592428	360	2	473	1	86.1078	0.450466	127.432	0.306135
2271	chr17	63500000	64000000	2272	-0.0726128	710	5	188	9	169.824	1.12617	50.6493	2.75522
2209	chr17	32500000	33000000	2210	-0.0743012	89	238	166	833	21.2878	53.6055	44.7223	255.011
2252	chr17	54000000	54500000	2253	-0.0815906	460	8	105	49	110.027	1.80187	28.2882	15.0006
2223	chr17	39500000	40000000	2224	-0.0860523	253	954	947	5	60.5147	214.872	255.133	1.53068
2242	chr17	49000000	49500000	2243	-0.101493	66	1665	316	16	15.7864	375.013	85.134	4.89817
2266	chr17	61000000	61500000	2267	-0.103164	11	982	100	250	2.63107	221.179	26.9411	76.5339
2262	chr17	59000000	59500000	2263	-0.126948	5	7	492	8	1.19594	1.57663	132.55	2.44908
2298	chr17	77000000	77500000	2299	-0.203045	0	2	301	1298	0	0.450466	81.0928	397.364
2150	chr17	3000000	3500000	2151	-0.211688	13	786	112	5	3.10945	177.033	30.1741	1.53068
2182	chr17	19000000	19500000	2183	-0.218824	914	1	38	7	218.618	0.225233	10.2376	2.14295
2184	chr17	20000000	20500000	2185	-0.223613	452	306	12	5	108.113	68.9214	3.23294	1.53068
2286	chr17	71000000	71500000	2287	-0.263017	31	1	173	230	7.41484	0.225233	46.6082	70.4112
2288	chr17	72000000	72500000	2289	-0.264866	9	0	373	52	2.1527	0	100.49	15.919
2172	chr17	14000000	14500000	2173	-0.266513	100	4	42	1110	23.9188	0.900933	11.3153	339.81
2196	chr17	26000000	26500000	2197	-0.310136	211	111	222	91	50.4688	25.0009	59.8093	27.8583
2162	chr17	9000000	9500000	2163	-0.325042	0	4	13	468	0	0.900933	3.50235	143.271
2183	chr17	19500000	20000000	2184	-0.336609	379	3	100	811	90.6524	0.6757	26.9411	248.276
2163	chr17	9500000	10000000	2164	-0.396423	18	1503	305	4	4.30539	338.525	82.1705	1.22454
2273	chr17	64500000	65000000	2274	-0.406931	42	5	126	1778	10.0459	1.12617	33.9458	544.309
2164	chr17	10000000	10500000	2165	-0.436236	1442	1	30	6	344.91	0.225233	8.08234	1.83681
2195	chr17	25500000	26000000	2196	-0.438616	764	4	232	10	182.74	0.900933	62.5035	3.06135
2186	chr17	21000000	21500000	2187	-0.454379	0	211	226	3	0	47.5242	60.887	0.918406
2156	chr17	6000000	6500000	2157	-0.530271	488	4	397	7	116.724	0.900933	106.956	2.14295
2185	chr17	20500000	21000000	2186	-0.565542	151	95	96	84	36.1175	21.3972	25.8635	25.7154
2285	chr17	70500000	71000000	2286	-0.57844	292	833	313	3	69.843	187.619	84.3258	0.918406
2287	chr17	71500000	72000000	2288	-0.582385	182	246	49	0	43.5323	55.4074	13.2012	0
2206	chr17	31000000	31500000	2207	-0.60308	388	23	7	27	92.8051	5.18036	1.88588	8.26566
2174	chr17	15000000	15500000	2175	-0.623188	161	0	237	3	38.5093	0	63.8505	0.918406
2171	chr17	13500000	14000000	2172	-0.643438	4	1	30	13	0.956754	0.225233	8.08234	3.97976
2250	chr17	53000000	53500000	2251	-0.648512	3	269	23	0	0.717565	60.5877	6.19646	0
2222	chr17	39000000	39500000	2223	-0.650923	387	846	381	47	92.5659	190.547	102.646	14.3884
[truncated: 3,522 more rows]

## Sheet: CCND1
	chr	start	end	id	E1	CCND1_c1	CCND1_c2	CCND1_e1	CCND1_e2	CCND1_c1_norm	CCND1_c2_norm	CCND1_e1_norm	CCND1_e2_norm
3	chr1	1000000	1500000	4	1.01074	1	272	2	4	0.21065	62.1946	0.496991	1.24772
4	chr1	1500000	2000000	5	0.888959	78	27	304	0	16.4307	6.17372	75.5426	0
5	chr1	2000000	2500000	6	0.672528	121	0	568	0	25.4887	0	141.145	0
6	chr1	2500000	3000000	7	0.33123	1	1	327	755	0.21065	0.228656	81.258	235.508
7	chr1	3000000	3500000	8	0.292534	15	16	174	144	3.15976	3.6585	43.2382	44.9181
8	chr1	3500000	4000000	9	0.429705	0	0	0	1	0	0	0	0.311931
9	chr1	4000000	4500000	10	-0.096685	446	11	895	6	93.9501	2.51522	222.403	1.87159
10	chr1	4500000	5000000	11	-0.169492	326	1059	4	197	68.672	242.147	0.993982	61.4504
11	chr1	5000000	5500000	12	-0.195987	5	6	13	13	1.05325	1.37194	3.23044	4.0551
12	chr1	5500000	6000000	13	-0.0136727	1088	1	763	4	229.188	0.228656	189.602	1.24772
13	chr1	6000000	6500000	14	0.568552	0	2512	5	1	0	574.385	1.24248	0.311931
14	chr1	6500000	7000000	15	0.698331	640	2	8	89	134.816	0.457313	1.98796	27.7619
15	chr1	7000000	7500000	16	0.212718	22	2487	552	11	4.63431	568.669	137.17	3.43124
16	chr1	7500000	8000000	17	0.325646	2	427	443	1	0.421301	97.6363	110.083	0.311931
17	chr1	8000000	8500000	18	0.547157	1	64	234	40	0.21065	14.634	58.1479	12.4772
18	chr1	8500000	9000000	19	0.783666	650	4	204	2758	136.923	0.914626	50.6931	860.306
19	chr1	9000000	9500000	20	0.858813	285	1	515	1	60.0354	0.228656	127.975	0.311931
20	chr1	9500000	10000000	21	0.871187	0	0	799	0	0	0	198.548	0
21	chr1	10000000	10500000	22	0.846768	543	1	285	5	114.383	0.228656	70.8212	1.55966
22	chr1	10500000	11000000	23	0.780394	21	1	0	3	4.42366	0.228656	0	0.935793
23	chr1	11000000	11500000	24	0.855664	222	52	200	22	46.7644	11.8901	49.6991	6.86248
24	chr1	11500000	12000000	25	0.837503	1035	3	487	1	218.023	0.685969	121.017	0.311931
25	chr1	12000000	12500000	26	0.863261	513	11	147	14	108.064	2.51522	36.5288	4.36704
26	chr1	12500000	13000000	27	0.53894	3	2	17	1	0.631951	0.457313	4.22442	0.311931
29	chr1	14000000	14500000	30	0.388903	98	832	323	180	20.6437	190.242	80.264	56.1476
30	chr1	14500000	15000000	31	0.52086	202	9	4	0	42.5514	2.05791	0.993982	0
31	chr1	15000000	15500000	32	0.370221	6	3	3	154	1.2639	0.685969	0.745486	48.0374
32	chr1	15500000	16000000	33	0.708508	0	2221	175	312	0	507.846	43.4867	97.3225
33	chr1	16000000	16500000	34	0.89781	1066	0	69	8	224.553	0	17.1462	2.49545
34	chr1	16500000	17000000	35	0.913539	587	0	872	337	123.652	0	216.688	105.121
35	chr1	17000000	17500000	36	0.799933	1308	1	251	766	275.531	0.228656	62.3724	238.939
36	chr1	17500000	18000000	37	0.474801	293	0	276	0	61.7206	0	68.5848	0
37	chr1	18000000	18500000	38	0.273227	659	7	904	4	138.819	1.6006	224.64	1.24772
38	chr1	18500000	19000000	39	0.334385	106	2	604	0	22.3289	0.457313	150.091	0
39	chr1	19000000	19500000	40	0.551466	397	0	276	423	83.6282	0	68.5848	131.947
40	chr1	19500000	20000000	41	0.745647	1102	2785	907	1717	232.137	636.808	225.385	535.586
41	chr1	20000000	20500000	42	0.438666	1275	26	116	55	268.579	5.94507	28.8255	17.1562
42	chr1	20500000	21000000	43	0.517753	448	11	75	2	94.3714	2.51522	18.6372	0.623862
43	chr1	21000000	21500000	44	0.762002	617	9	77	234	129.971	2.05791	19.1342	72.9919
44	chr1	21500000	22000000	45	0.642504	2	0	161	0	0.421301	0	40.0078	0
45	chr1	22000000	22500000	46	0.660279	812	41	105	1709	171.048	9.37491	26.092	533.09
46	chr1	22500000	23000000	47	0.538033	6	4	268	2	1.2639	0.914626	66.5968	0.623862
47	chr1	23000000	23500000	48	0.577669	0	2	40	0	0	0.457313	9.93982	0
48	chr1	23500000	24000000	49	0.78042	63	62	710	172	13.271	14.1767	176.432	53.6522
49	chr1	24000000	24500000	50	0.734632	2	0	26	2	0.421301	0	6.46088	0.623862
50	chr1	24500000	25000000	51	0.679499	354	52	777	2	74.5703	11.8901	193.081	0.623862
51	chr1	25000000	25500000	52	0.760961	19	21	135	50	4.00236	4.80179	33.5469	15.5966
52	chr1	25500000	26000000	53	0.743148	53	14	594	246	11.1645	3.20119	147.606	76.7351
53	chr1	26000000	26500000	54	0.782583	370	152	69	1111	77.9407	34.7558	17.1462	346.555
54	chr1	26500000	27000000	55	0.802569	1967	4	1040	6	414.349	0.914626	258.435	1.87159
55	chr1	27000000	27500000	56	0.770478	18	0	951	0	3.79171	0	236.319	0
56	chr1	27500000	28000000	57	0.762438	1766	907	402	0	372.009	207.391	99.8952	0
57	chr1	28000000	28500000	58	0.684596	540	771	388	4	113.751	176.294	96.4162	1.24772
58	chr1	28500000	29000000	59	0.713653	487	0	56	2351	102.587	0	13.9157	733.35
59	chr1	29000000	29500000	60	0.587792	15	0	642	286	3.15976	0	159.534	89.2123
60	chr1	29500000	30000000	61	0.392351	655	0	168	3	137.976	0	41.7472	0.935793
61	chr1	30000000	30500000	62	0.263907	5	10	279	17	1.05325	2.28656	69.3302	5.30283
62	chr1	30500000	31000000	63	0.228615	623	591	433	69	131.235	135.136	107.599	21.5232
63	chr1	31000000	31500000	64	0.463758	1218	0	10	2	256.572	0	2.48495	0.623862
64	chr1	31500000	32000000	65	0.659847	1348	2	273	16	283.957	0.457313	67.8393	4.9909
65	chr1	32000000	32500000	66	0.754872	1	1	0	239	0.21065	0.228656	0	74.5515
66	chr1	32500000	33000000	67	0.751556	69	9	167	1378	14.5349	2.05791	41.4987	429.841
67	chr1	33000000	33500000	68	0.715244	902	9	64	11	190.007	2.05791	15.9037	3.43124
68	chr1	33500000	34000000	69	0.590154	187	1	576	4	39.3916	0.228656	143.133	1.24772
69	chr1	34000000	34500000	70	0.113685	5	2	786	219	1.05325	0.457313	195.317	68.3129
70	chr1	34500000	35000000	71	0.0502637	306	33	529	263	64.459	7.54566	131.454	82.0379
71	chr1	35000000	35500000	72	0.303189	696	794	445	6	146.613	181.553	110.58	1.87159
72	chr1	35500000	36000000	73	0.744608	3	5	1213	0	0.631951	1.14328	301.425	0
73	chr1	36000000	36500000	74	0.728151	763	1	338	260	160.726	0.228656	83.9915	81.1021
74	chr1	36500000	37000000	75	0.723409	21	25	473	32	4.42366	5.71641	117.538	9.9818
75	chr1	37000000	37500000	76	0.256468	304	15	83	80	64.0377	3.42985	20.6251	24.9545
76	chr1	37500000	38000000	77	0.310119	12	19	92	13	2.52781	4.34447	22.8616	4.0551
77	chr1	38000000	38500000	78	0.646171	12	1665	234	271	2.52781	380.713	58.1479	84.5333
78	chr1	38500000	39000000	79	0.26521	228	0	0	3	48.0283	0	0	0.935793
79	chr1	39000000	39500000	80	0.390651	703	3	546	1476	148.087	0.685969	135.679	460.41
80	chr1	39500000	40000000	81	0.769025	598	1218	453	1	125.969	278.504	112.568	0.311931
81	chr1	40000000	40500000	82	0.789472	586	2	1	3	123.441	0.457313	0.248495	0.935793
82	chr1	40500000	41000000	83	0.848998	729	1102	1174	103	153.564	251.979	291.734	32.1289
83	chr1	41000000	41500000	84	0.777893	574	3	538	2	120.913	0.685969	133.691	0.623862
84	chr1	41500000	42000000	85	0.616709	501	11	15	9	105.536	2.51522	3.72743	2.80738
85	chr1	42000000	42500000	86	0.690465	0	3	490	538	0	0.685969	121.763	167.819
86	chr1	42500000	43000000	87	0.700836	570	3	28	4	120.071	0.685969	6.95787	1.24772
87	chr1	43000000	43500000	88	0.774789	1190	0	164	32	250.674	0	40.7533	9.9818
88	chr1	43500000	44000000	89	0.737117	1	10	41	2	0.21065	2.28656	10.1883	0.623862
89	chr1	44000000	44500000	90	0.879665	1	0	110	0	0.21065	0	27.3345	0
90	chr1	44500000	45000000	91	0.74802	217	0	224	0	45.7111	0	55.663	0
91	chr1	45000000	45500000	92	0.854027	1226	0	1	1	258.257	0	0.248495	0.311931
92	chr1	45500000	46000000	93	0.822033	23	415	268	87	4.84496	94.8924	66.5968	27.138
93	chr1	46000000	46500000	94	0.905883	1	2	4	0	0.21065	0.457313	0.993982	0
94	chr1	46500000	47000000	95	0.826795	8	0	66	271	1.6852	0	16.4007	84.5333
95	chr1	47000000	47500000	96	0.625036	10	20	14	1166	2.1065	4.57313	3.47894	363.712
96	chr1	47500000	48000000	97	0.35193	38	3	7	4	8.00472	0.685969	1.73947	1.24772
97	chr1	48000000	48500000	98	-0.271945	59	537	355	2	12.4284	122.789	88.2159	0.623862
98	chr1	48500000	49000000	99	-0.812931	18	19	8	13	3.79171	4.34447	1.98796	4.0551
99	chr1	49000000	49500000	100	-0.712376	1	48	843	0	0.21065	10.9755	209.482	0
100	chr1	49500000	50000000	101	-1.01696	16	5	16	6	3.37041	1.14328	3.97593	1.87159
101	chr1	50000000	50500000	102	-1.03654	554	4	251	26	116.7	0.914626	62.3724	8.11021
102	chr1	50500000	51000000	103	-0.597251	2	0	1	6	0.421301	0	0.248495	1.87159
103	chr1	51000000	51500000	104	0.0172426	9	0	1	10	1.89585	0	0.248495	3.11931
104	chr1	51500000	52000000	105	0.242705	7	6	8	4	1.47455	1.37194	1.98796	1.24772
105	chr1	52000000	52500000	106	0.613911	697	0	544	1134	146.823	0	135.182	353.73
106	chr1	52500000	53000000	107	0.844024	26	12	28	4	5.47691	2.74388	6.95787	1.24772
107	chr1	53000000	53500000	108	0.751477	11	5	425	22	2.31715	1.14328	105.611	6.86248
108	chr1	53500000	54000000	109	0.784065	5	11	140	6	1.05325	2.51522	34.7894	1.87159
109	chr1	54000000	54500000	110	0.738549	4	8	115	64	0.842602	1.82925	28.577	19.9636
110	chr1	54500000	55000000	111	0.824425	135	5	70	1233	28.4378	1.14328	17.3947	384.611
111	chr1	55000000	55500000	112	0.564172	2	3	8	3	0.421301	0.685969	1.98796	0.935793
112	chr1	55500000	56000000	113	0.138142	14	2	77	740	2.94911	0.457313	19.1342	230.829
113	chr1	56000000	56500000	114	-0.364197	176	2357	51	0	37.0745	538.943	12.6733	0
114	chr1	56500000	57000000	115	-0.250476	26	21	28	16	5.47691	4.80179	6.95787	4.9909
115	chr1	57000000	57500000	116	-0.14896	58	120	1308	59	12.2177	27.4388	325.032	18.4039
116	chr1	57500000	58000000	117	-0.0792868	6	17	153	11	1.2639	3.88716	38.0198	3.43124
117	chr1	58000000	58500000	118	-0.265173	0	2	0	1	0	0.457313	0	0.311931
118	chr1	58500000	59000000	119	0.0524656	5	3	15	7	1.05325	0.685969	3.72743	2.18352
119	chr1	59000000	59500000	120	0.412494	539	1132	17	38	113.541	258.839	4.22442	11.8534
120	chr1	59500000	60000000	121	0.402219	392	120	36	6	82.575	27.4388	8.94584	1.87159
121	chr1	60000000	60500000	122	-0.177963	6	4	565	2	1.2639	0.914626	140.4	0.623862
122	chr1	60500000	61000000	123	-0.747674	1	1	517	3	0.21065	0.228656	128.472	0.935793
123	chr1	61000000	61500000	124	-0.514348	290	4	6	3	61.0886	0.914626	1.49097	0.935793
124	chr1	61500000	62000000	125	-0.184342	2	871	1	1	0.421301	199.16	0.248495	0.311931
125	chr1	62000000	62500000	126	-0.21295	106	881	5	1	22.3289	201.446	1.24248	0.311931
126	chr1	62500000	63000000	127	0.247984	382	1	42	366	80.4685	0.228656	10.4368	114.167
127	chr1	63000000	63500000	128	-0.036866	5	6	7	1	1.05325	1.37194	1.73947	0.311931
128	chr1	63500000	64000000	129	-0.217168	125	508	4	444	26.3313	116.157	0.993982	138.497
129	chr1	64000000	64500000	130	-0.339808	32	13	54	32	6.74081	2.97253	13.4188	9.9818
130	chr1	64500000	65000000	131	-0.352441	5	3	10	3	1.05325	0.685969	2.48495	0.935793
131	chr1	65000000	65500000	132	-0.0200461	898	0	1107	386	189.164	0	275.085	120.405
132	chr1	65500000	66000000	133	-0.335581	451	2	277	1	95.0034	0.457313	68.8332	0.311931
133	chr1	66000000	66500000	134	-0.906556	10	1	9	29	2.1065	0.228656	2.23646	9.046
134	chr1	66500000	67000000	135	-0.688565	22	8	375	8	4.63431	1.82925	93.1858	2.49545
135	chr1	67000000	67500000	136	-0.249518	5	8	6	8	1.05325	1.82925	1.49097	2.49545
136	chr1	67500000	68000000	137	0.0278024	93	0	2	9	19.5905	0	0.496991	2.80738
137	chr1	68000000	68500000	138	-0.564579	5	7	4	0	1.05325	1.6006	0.993982	0
138	chr1	68500000	69000000	139	-0.80446	6	8	10	6	1.2639	1.82925	2.48495	1.87159
139	chr1	69000000	69500000	140	-0.770976	18	2	15	1	3.79171	0.457313	3.72743	0.311931
140	chr1	69500000	70000000	141	-0.44628	9	8	17	6	1.89585	1.82925	4.22442	1.87159
141	chr1	70000000	70500000	142	-0.716058	6	1	2	3	1.2639	0.228656	0.496991	0.935793
142	chr1	70500000	71000000	143	-0.238287	287	0	82	1	60.4567	0	20.3766	0.311931
143	chr1	71000000	71500000	144	-0.252942	37	0	279	1184	7.79407	0	69.3302	369.326
144	chr1	71500000	72000000	145	-0.7461	30	33	263	3707	6.31951	7.54566	65.3543	1156.33
145	chr1	72000000	72500000	146	-0.570581	2	0	24	0	0.421301	0	5.96389	0
146	chr1	72500000	73000000	147	-0.691739	3	3	0	0	0.631951	0.685969	0	0
147	chr1	73000000	73500000	148	-0.847721	39	7	74	4	8.21537	1.6006	18.3887	1.24772
148	chr1	73500000	74000000	149	-0.884994	11	25	10	31	2.31715	5.71641	2.48495	9.66986
149	chr1	74000000	74500000	150	-0.812598	1011	1	7	16	212.968	0.228656	1.73947	4.9909
150	chr1	74500000	75000000	151	-0.848952	9	2	11	3	1.89585	0.457313	2.73345	0.935793
151	chr1	75000000	75500000	152	-0.663715	21	6	8	3	4.42366	1.37194	1.98796	0.935793
152	chr1	75500000	76000000	153	-0.685183	5	856	4	3	1.05325	195.73	0.993982	0.935793
153	chr1	76000000	76500000	154	-0.321443	19	7	12	5	4.00236	1.6006	2.98195	1.55966
154	chr1	76500000	77000000	155	-0.597326	24	452	23	18	5.05561	103.353	5.7154	5.61476
155	chr1	77000000	77500000	156	-0.736643	3	78	10	98	0.631951	17.8352	2.48495	30.5692
156	chr1	77500000	78000000	157	-0.483729	10	24	1	1	2.1065	5.48776	0.248495	0.311931
157	chr1	78000000	78500000	158	0.148951	22	610	10	2	4.63431	139.48	2.48495	0.623862
158	chr1	78500000	79000000	159	-0.650525	8	5	302	7	1.6852	1.14328	75.0456	2.18352
159	chr1	79000000	79500000	160	-0.825844	13	10	32	15	2.73846	2.28656	7.95186	4.67897
160	chr1	79500000	80000000	161	-0.916681	18	0	11	1	3.79171	0	2.73345	0.311931
161	chr1	80000000	80500000	162	-0.921881	1	1	249	1	0.21065	0.228656	61.8754	0.311931
162	chr1	80500000	81000000	163	-0.898303	0	0	15	5	0	0	3.72743	1.55966
163	chr1	81000000	81500000	164	-0.923443	117	3	75	1	24.6461	0.685969	18.6372	0.311931
164	chr1	81500000	82000000	165	-0.850672	1	11	20	0	0.21065	2.51522	4.96991	0
165	chr1	82000000	82500000	166	-0.86204	447	2216	18	36	94.1607	506.703	4.47292	11.2295
166	chr1	82500000	83000000	167	-0.895512	85	11	13	44	17.9053	2.51522	3.23044	13.725
167	chr1	83000000	83500000	168	-0.900183	2	9	11	456	0.421301	2.05791	2.73345	142.241
169	chr1	84000000	84500000	170	-0.588719	215	104	270	47	45.2898	23.7803	67.0938	14.6608
170	chr1	84500000	85000000	171	0.0659392	8	0	4	6	1.6852	0	0.993982	1.87159
171	chr1	85000000	85500000	172	-0.175809	5	5	121	1	1.05325	1.14328	30.068	0.311931
172	chr1	85500000	86000000	173	-0.366497	57	93	430	5	12.0071	21.2651	106.853	1.55966
173	chr1	86000000	86500000	174	-0.71653	363	6	224	6	76.4661	1.37194	55.663	1.87159
174	chr1	86500000	87000000	175	-0.715057	11	5	23	3	2.31715	1.14328	5.7154	0.935793
175	chr1	87000000	87500000	176	-0.279514	63	11	33	27	13.271	2.51522	8.20035	8.42214
176	chr1	87500000	88000000	177	-0.534291	100	1755	131	1	21.065	401.292	32.5529	0.311931
177	chr1	88000000	88500000	178	-0.894621	159	12	6	27	33.4934	2.74388	1.49097	8.42214
178	chr1	88500000	89000000	179	-0.885203	1	16	6	3	0.21065	3.6585	1.49097	0.935793
179	chr1	89000000	89500000	180	-0.150088	10	2	35	4	2.1065	0.457313	8.69734	1.24772
180	chr1	89500000	90000000	181	0.0681549	750	6	12	4	157.988	1.37194	2.98195	1.24772
181	chr1	90000000	90500000	182	0.259573	524	1	857	1	110.381	0.228656	212.961	0.311931
182	chr1	90500000	91000000	183	-0.293125	584	65	146	3	123.02	14.8627	36.2803	0.935793
183	chr1	91000000	91500000	184	0.153186	4	1803	248	1	0.842602	412.268	61.6269	0.311931
184	chr1	91500000	92000000	185	-0.0195779	16	14	563	7	3.37041	3.20119	139.903	2.18352
185	chr1	92000000	92500000	186	0.213699	394	29	161	44	82.9963	6.63104	40.0078	13.725
186	chr1	92500000	93000000	187	0.474656	75	37	21	5	15.7988	8.46029	5.21841	1.55966
187	chr1	93000000	93500000	188	0.436761	548	3218	43	7	115.436	735.816	10.6853	2.18352
188	chr1	93500000	94000000	189	0.658709	318	13	40	2914	66.9868	2.97253	9.93982	908.967
189	chr1	94000000	94500000	190	0.545896	5	7	553	11	1.05325	1.6006	137.418	3.43124
190	chr1	94500000	95000000	191	0.328684	765	0	0	0	161.148	0	0	0
191	chr1	95000000	95500000	192	-0.0671066	6	9	2	0	1.2639	2.05791	0.496991	0
192	chr1	95500000	96000000	193	-0.635826	3	2	315	1	0.631951	0.457313	78.2761	0.311931
193	chr1	96000000	96500000	194	-0.900546	0	0	108	1	0	0	26.8375	0.311931
194	chr1	96500000	97000000	195	-0.83624	19	14	11	0	4.00236	3.20119	2.73345	0
195	chr1	97000000	97500000	196	-0.575714	5	8	9	2	1.05325	1.82925	2.23646	0.623862
196	chr1	97500000	98000000	197	-0.448495	22	10	36	498	4.63431	2.28656	8.94584	155.342
197	chr1	98000000	98500000	198	-0.279466	3	9	4	4	0.631951	2.05791	0.993982	1.24772
198	chr1	98500000	99000000	199	-0.577718	11	0	10	2	2.31715	0	2.48495	0.623862
199	chr1	99000000	99500000	200	-0.811026	7	12	15	6	1.47455	2.74388	3.72743	1.87159
200	chr1	99500000	100000000	201	-0.798763	7	6	3	27	1.47455	1.37194	0.745486	8.42214
201	chr1	100000000	100500000	202	-0.222445	59	413	19	7	12.4284	94.4351	4.72141	2.18352
202	chr1	100500000	101000000	203	0.226613	1	0	65	3	0.21065	0	16.1522	0.935793
203	chr1	101000000	101500000	204	-0.124028	26	2	14	2	5.47691	0.457313	3.47894	0.623862
204	chr1	101500000	102000000	205	0.198543	2	1	32	1	0.421301	0.228656	7.95186	0.311931
205	chr1	102000000	102500000	206	-0.686142	3	2	1	1	0.631951	0.457313	0.248495	0.311931
206	chr1	102500000	103000000	207	-0.766336	92	4	7	6	19.3798	0.914626	1.73947	1.87159
207	chr1	103000000	103500000	208	-0.822918	122	3	3	4	25.6994	0.685969	0.745486	1.24772
210	chr1	104500000	105000000	211	-0.928592	5	1	7	0	1.05325	0.228656	1.73947	0
211	chr1	105000000	105500000	212	-0.922059	15	5	3	4	3.15976	1.14328	0.745486	1.24772
212	chr1	105500000	106000000	213	-0.954146	2	1	259	0	0.421301	0.228656	64.3603	0
213	chr1	106000000	106500000	214	-0.918377	927	182	74	122	195.273	41.6155	18.3887	38.0556
214	chr1	106500000	107000000	215	-0.940877	16	5	8	0	3.37041	1.14328	1.98796	0
215	chr1	107000000	107500000	216	-0.94837	2	2	10	1	0.421301	0.457313	2.48495	0.311931
216	chr1	107500000	108000000	217	-0.754824	13	7	21	1	2.73846	1.6006	5.21841	0.311931
217	chr1	108000000	108500000	218	-0.0986405	3	2	6	6	0.631951	0.457313	1.49097	1.87159
218	chr1	108500000	109000000	219	0.143468	707	4	326	76	148.93	0.914626	81.0095	23.7068
219	chr1	109000000	109500000	220	0.437449	19	103	986	3	4.00236	23.5516	245.017	0.935793
220	chr1	109500000	110000000	221	0.785209	291	1320	410	1	61.2993	301.827	101.883	0.311931
221	chr1	110000000	110500000	222	0.932189	736	5	119	144	155.039	1.14328	29.571	44.9181
222	chr1	110500000	111000000	223	0.915908	475	473	80	1	100.059	108.155	19.8796	0.311931
223	chr1	111000000	111500000	224	0.903358	699	20	7	38	147.245	4.57313	1.73947	11.8534
224	chr1	111500000	112000000	225	0.992261	75	15	68	1956	15.7988	3.42985	16.8977	610.137
225	chr1	112000000	112500000	226	0.7754	848	46	878	402	178.632	10.5182	218.179	125.396
226	chr1	112500000	113000000	227	0.488707	453	1571	55	6	95.4247	359.219	13.6673	1.87159
227	chr1	113000000	113500000	228	0.738722	8	945	174	7	1.6852	216.08	43.2382	2.18352
228	chr1	113500000	114000000	229	0.606915	366	1	499	1	77.0981	0.228656	123.999	0.311931
229	chr1	114000000	114500000	230	0.667345	47	2975	188	37	9.90057	680.253	46.7172	11.5415
230	chr1	114500000	115000000	231	0.680744	3	6	8	3	0.631951	1.37194	1.98796	0.935793
231	chr1	115000000	115500000	232	0.639848	8	3	170	6	1.6852	0.685969	42.2442	1.87159
232	chr1	115500000	116000000	233	0.552554	30	58	102	7	6.31951	13.2621	25.3465	2.18352
233	chr1	116000000	116500000	234	0.580002	20	55	16	0	4.21301	12.5761	3.97593	0
234	chr1	116500000	117000000	235	0.556664	389	66	64	25	81.943	15.0913	15.9037	7.79828
235	chr1	117000000	117500000	236	0.772965	7	14	105	2	1.47455	3.20119	26.092	0.623862
236	chr1	117500000	118000000	237	0.417528	8	1	5	6	1.6852	0.228656	1.24248	1.87159
237	chr1	118000000	118500000	238	0.238495	114	96	81	26	24.0142	21.951	20.1281	8.11021
238	chr1	118500000	119000000	239	-0.625201	13	26	13	15	2.73846	5.94507	3.23044	4.67897
239	chr1	119000000	119500000	240	-0.756918	11	6	13	6	2.31715	1.37194	3.23044	1.87159
240	chr1	119500000	120000000	241	-0.278136	52	8	387	7	10.9538	1.82925	96.1678	2.18352
241	chr1	120000000	120500000	242	0.121869	0	26	1	3	0	5.94507	0.248495	0.935793
243	chr1	121000000	121500000	244	0.0404594	10	167	44	12	2.1065	38.1856	10.9338	3.74317
290	chr1	144500000	145000000	291	0.695667	71	3	430	2	14.9562	0.685969	106.853	0.623862
291	chr1	145000000	145500000	292	0.824198	253	5	291	2	53.2946	1.14328	72.3122	0.623862
294	chr1	146500000	147000000	295	0.772925	301	3002	225	68	63.4058	686.427	55.9115	21.2113
295	chr1	147000000	147500000	296	0.860181	167	1	99	288	35.1786	0.228656	24.6011	89.8362
299	chr1	149000000	149500000	300	-0.360481	47	51	215	556	9.90057	11.6615	53.4265	173.434
301	chr1	150000000	150500000	302	1.05226	1	0	12	2340	0.21065	0	2.98195	729.919
302	chr1	150500000	151000000	303	1.11496	204	653	91	12	42.9727	149.313	22.6131	3.74317
303	chr1	151000000	151500000	304	1.05376	579	143	16	8	121.967	32.6979	3.97593	2.49545
304	chr1	151500000	152000000	305	0.958724	333	106	142	206	70.1466	24.2376	35.2864	64.2578
305	chr1	152000000	152500000	306	0.672169	4	749	317	4	0.842602	171.264	78.7731	1.24772
306	chr1	152500000	153000000	307	0.241229	4	1	178	3	0.842602	0.228656	44.2322	0.935793
307	chr1	153000000	153500000	308	0.440272	1203	7	720	11	253.412	1.6006	178.917	3.43124
308	chr1	153500000	154000000	309	0.925403	986	3	296	3	207.701	0.685969	73.5547	0.935793
309	chr1	154000000	154500000	310	0.857555	1	3	77	4	0.21065	0.685969	19.1342	1.24772
310	chr1	154500000	155000000	311	0.963306	298	8	325	6	62.7738	1.82925	80.761	1.87159
311	chr1	155000000	155500000	312	0.972472	52	927	42	0	10.9538	211.965	10.4368	0
312	chr1	155500000	156000000	313	0.9588	2	312	1	7	0.421301	71.3408	0.248495	2.18352
313	chr1	156000000	156500000	314	0.970296	211	0	109	3	44.4472	0	27.086	0.935793
314	chr1	156500000	157000000	315	0.882589	753	0	1077	0	158.62	0	267.63	0
315	chr1	157000000	157500000	316	0.378135	4	4	73	4	0.842602	0.914626	18.1402	1.24772
316	chr1	157500000	158000000	317	0.299067	304	36	2	2295	64.0377	8.23163	0.496991	715.882
317	chr1	158000000	158500000	318	0.689818	286	2	34	13	60.246	0.457313	8.44885	4.0551
318	chr1	158500000	159000000	319	0.236566	21	10	8	4	4.42366	2.28656	1.98796	1.24772
319	chr1	159000000	159500000	320	0.0207658	28	307	270	3	5.89821	70.1975	67.0938	0.935793
320	chr1	159500000	160000000	321	0.266062	63	570	399	3	13.271	130.334	99.1497	0.935793
321	chr1	160000000	160500000	322	0.844109	774	2	365	521	163.043	0.457313	90.7009	162.516
322	chr1	160500000	161000000	323	0.965509	449	12	14	14	94.582	2.74388	3.47894	4.36704
323	chr1	161000000	161500000	324	0.902684	45	62	37	79	9.47927	14.1767	9.19433	24.6426
324	chr1	161500000	162000000	325	0.587922	1	322	38	55	0.21065	73.6274	9.44283	17.1562
325	chr1	162000000	162500000	326	0.109427	6	7	20	1718	1.2639	1.6006	4.96991	535.898
326	chr1	162500000	163000000	327	-0.0732706	7	17	273	508	1.47455	3.88716	67.8393	158.461
327	chr1	163000000	163500000	328	-0.435327	5	10	58	220	1.05325	2.28656	14.4127	68.6248
328	chr1	163500000	164000000	329	-0.468382	17	3	147	2	3.58106	0.685969	36.5288	0.623862
329	chr1	164000000	164500000	330	-0.784031	23	17	25	6	4.84496	3.88716	6.21239	1.87159
330	chr1	164500000	165000000	331	-0.659664	1	3	1	0	0.21065	0.685969	0.248495	0
331	chr1	165000000	165500000	332	-0.465569	13	15	721	20	2.73846	3.42985	179.165	6.23862
332	chr1	165500000	166000000	333	0.172313	2	17	7	3	0.421301	3.88716	1.73947	0.935793
333	chr1	166000000	166500000	334	-0.204628	713	3	10	36	150.194	0.685969	2.48495	11.2295
334	chr1	166500000	167000000	335	-0.0689376	1	0	10	0	0.21065	0	2.48495	0
335	chr1	167000000	167500000	336	0.47379	88	56	34	8	18.5372	12.8048	8.44885	2.49545
336	chr1	167500000	168000000	337	0.622065	814	34	5	0	171.469	7.77432	1.24248	0
337	chr1	168000000	168500000	338	0.57083	422	0	44	1070	88.8945	0	10.9338	333.766
338	chr1	168500000	169000000	339	0.123508	9	11	16	389	1.89585	2.51522	3.97593	121.341
339	chr1	169000000	169500000	340	0.294908	8	10	351	8	1.6852	2.28656	87.2219	2.49545
340	chr1	169500000	170000000	341	0.470069	39	287	190	1	8.21537	65.6244	47.2141	0.311931
341	chr1	170000000	170500000	342	0.225962	7	1337	6	8	1.47455	305.714	1.49097	2.49545
342	chr1	170500000	171000000	343	-0.09611	4	1	1	23	0.842602	0.228656	0.248495	7.17442
343	chr1	171000000	171500000	344	-0.0254627	10	4	117	4	2.1065	0.914626	29.074	1.24772
344	chr1	171500000	172000000	345	0.399163	7	262	327	8	1.47455	59.908	81.258	2.49545
345	chr1	172000000	172500000	346	0.35164	16	20	19	5	3.37041	4.57313	4.72141	1.55966
346	chr1	172500000	173000000	347	0.450465	9	13	221	4	1.89585	2.97253	54.9175	1.24772
347	chr1	173000000	173500000	348	0.271555	384	29	239	8	80.8898	6.63104	59.3904	2.49545
348	chr1	173500000	174000000	349	0.376004	23	9	91	9	4.84496	2.05791	22.6131	2.80738
349	chr1	174000000	174500000	350	0.175134	5	2	13	10	1.05325	0.457313	3.23044	3.11931
350	chr1	174500000	175000000	351	0.0612322	14	78	152	3	2.94911	17.8352	37.7713	0.935793
351	chr1	175000000	175500000	352	-0.0683745	93	0	5	2	19.5905	0	1.24248	0.623862
352	chr1	175500000	176000000	353	-0.316693	30	15	24	26	6.31951	3.42985	5.96389	8.11021
353	chr1	176000000	176500000	354	-0.428405	22	5	21	2	4.63431	1.14328	5.21841	0.623862
354	chr1	176500000	177000000	355	-0.728404	1	0	64	0	0.21065	0	15.9037	0
355	chr1	177000000	177500000	356	-0.727653	1	5	60	6	0.21065	1.14328	14.9097	1.87159
356	chr1	177500000	178000000	357	-0.515826	31	289	143	56	6.53016	66.0817	35.5349	17.4681
357	chr1	178000000	178500000	358	-0.543893	10	7	22	911	2.1065	1.6006	5.4669	284.169
358	chr1	178500000	179000000	359	0.0112379	19	436	313	2965	4.00236	99.6942	77.7791	924.876
359	chr1	179000000	179500000	360	0.238505	8	106	3	0	1.6852	24.2376	0.745486	0
360	chr1	179500000	180000000	361	0.238404	144	3	3	2	30.3337	0.685969	0.745486	0.623862
361	chr1	180000000	180500000	362	0.467846	25	20	272	14	5.26626	4.57313	67.5908	4.36704
362	chr1	180500000	181000000	363	0.49084	448	2	1	1	94.3714	0.457313	0.248495	0.311931
363	chr1	181000000	181500000	364	0.244677	40	13	17	51	8.42602	2.97253	4.22442	15.9085
364	chr1	181500000	182000000	365	-0.119073	3	12	3	4	0.631951	2.74388	0.745486	1.24772
365	chr1	182000000	182500000	366	0.459432	1	0	1	7	0.21065	0	0.248495	2.18352
366	chr1	182500000	183000000	367	0.198396	6	1	38	7	1.2639	0.228656	9.44283	2.18352
367	chr1	183000000	183500000	368	0.140392	2	3	318	4	0.421301	0.685969	79.0216	1.24772
368	chr1	183500000	184000000	369	0.10779	8	9	23	2802	1.6852	2.05791	5.7154	874.031
369	chr1	184000000	184500000	370	-0.237011	3	686	71	5	0.631951	156.858	17.6432	1.55966
370	chr1	184500000	185000000	371	-0.323456	127	157	104	370	26.7526	35.8991	25.8435	115.415
371	chr1	185000000	185500000	372	-0.311764	6	5	405	57	1.2639	1.14328	100.641	17.7801
372	chr1	185500000	186000000	373	-0.765834	102	890	131	181	21.4863	203.504	32.5529	56.4595
373	chr1	186000000	186500000	374	-0.638781	12	24	164	115	2.52781	5.48776	40.7533	35.8721
374	chr1	186500000	187000000	375	-0.875497	50	23	61	23	10.5325	5.2591	15.1582	7.17442
375	chr1	187000000	187500000	376	-0.858051	7	5	8	2	1.47455	1.14328	1.98796	0.623862
376	chr1	187500000	188000000	377	-1.0233	24	2293	71	32	5.05561	524.309	17.6432	9.9818
377	chr1	188000000	188500000	378	-1.01136	15	9	13	3	3.15976	2.05791	3.23044	0.935793
378	chr1	188500000	189000000	379	-0.983683	3	5	4	4	0.631951	1.14328	0.993982	1.24772
379	chr1	189000000	189500000	380	-0.968979	4	1	12	2	0.842602	0.228656	2.98195	0.623862
380	chr1	189500000	190000000	381	-1.00501	0	4	4	2	0	0.914626	0.993982	0.623862
381	chr1	190000000	190500000	382	-0.976351	7	28	12	3	1.47455	6.40238	2.98195	0.935793
382	chr1	190500000	191000000	383	-0.98411	70	9	9	3	14.7455	2.05791	2.23646	0.935793
383	chr1	191000000	191500000	384	-1.00264	3	0	1	1	0.631951	0	0.248495	0.311931
384	chr1	191500000	192000000	385	-0.992222	0	1	0	0	0	0.228656	0	0
385	chr1	192000000	192500000	386	-0.876289	10	543	4	1	2.1065	124.16	0.993982	0.311931
386	chr1	192500000	193000000	387	-0.7044	60	0	3	2	12.639	0	0.745486	0.623862
387	chr1	193000000	193500000	388	-0.370612	11	10	131	57	2.31715	2.28656	32.5529	17.7801
388	chr1	193500000	194000000	389	-0.747699	7	1323	4	3	1.47455	302.513	0.993982	0.935793
389	chr1	194000000	194500000	390	-0.546398	15	1059	21	26	3.15976	242.147	5.21841	8.11021
390	chr1	194500000	195000000	391	-0.592228	1	0	0	1	0.21065	0	0	0.311931
391	chr1	195000000	195500000	392	-0.57493	38	8	313	11	8.00472	1.82925	77.7791	3.43124
392	chr1	195500000	196000000	393	-0.807115	34	34	50	25	7.16212	7.77432	12.4248	7.79828
393	chr1	196000000	196500000	394	-1.02995	769	35	15	49	161.99	8.00298	3.72743	15.2846
394	chr1	196500000	197000000	395	-1.03544	1	0	2	1	0.21065	0	0.496991	0.311931
395	chr1	197000000	197500000	396	-0.648995	11	3	16	1	2.31715	0.685969	3.97593	0.311931
396	chr1	197500000	198000000	397	-0.222762	138	930	12	35	29.0698	212.651	2.98195	10.9176
397	chr1	198000000	198500000	398	-0.0557851	25	65	142	152	5.26626	14.8627	35.2864	47.4135
398	chr1	198500000	199000000	399	-0.116145	7	13	1	1220	1.47455	2.97253	0.248495	380.556
399	chr1	199000000	199500000	400	-0.263208	1570	3	4	2	330.721	0.685969	0.993982	0.623862
400	chr1	199500000	200000000	401	-0.555257	52	1	453	1	10.9538	0.228656	112.568	0.311931
401	chr1	200000000	200500000	402	-0.208336	7	8	33	8	1.47455	1.82925	8.20035	2.49545
402	chr1	200500000	201000000	403	0.480831	13	0	512	66	2.73846	0	127.23	20.5875
403	chr1	201000000	201500000	404	0.636927	456	0	9	23	96.0566	0	2.23646	7.17442
404	chr1	201500000	202000000	405	0.778828	0	3392	1320	4	0	775.603	328.014	1.24772
405	chr1	202000000	202500000	406	0.840598	19	0	0	0	4.00236	0	0	0
406	chr1	202500000	203000000	407	0.940666	128	1	3	15	26.9633	0.228656	0.745486	4.67897
407	chr1	203000000	203500000	408	0.84197	517	5	138	4	108.906	1.14328	34.2924	1.24772
408	chr1	203500000	204000000	409	0.980598	85	4	221	6	17.9053	0.914626	54.9175	1.87159
409	chr1	204000000	204500000	410	0.94055	35	0	550	0	7.37277	0	136.673	0
410	chr1	204500000	205000000	411	0.87037	0	360	214	1	0	82.3163	53.178	0.311931
411	chr1	205000000	205500000	412	0.939876	0	611	696	1	0	139.709	172.953	0.311931
412	chr1	205500000	206000000	413	0.975915	356	11	429	38	74.9916	2.51522	106.605	11.8534
414	chr1	206500000	207000000	415	0.938409	29	19	75	178	6.10886	4.34447	18.6372	55.5237
415	chr1	207000000	207500000	416	0.650067	0	1	3	0	0	0.228656	0.745486	0
416	chr1	207500000	208000000	417	0.537516	133	89	115	32	28.0165	20.3504	28.577	9.9818
417	chr1	208000000	208500000	418	0.123443	73	0	534	2091	15.3775	0	132.697	652.248
418	chr1	208500000	209000000	419	-0.431164	23	35	263	107	4.84496	8.00298	65.3543	33.3766
419	chr1	209000000	209500000	420	-0.417263	1005	3	29	3	211.704	0.685969	7.20637	0.935793
420	chr1	209500000	210000000	421	-0.0884901	0	1	9	1	0	0.228656	2.23646	0.311931
421	chr1	210000000	210500000	422	-0.241307	263	115	310	65	55.4011	26.2955	77.0336	20.2755
422	chr1	210500000	211000000	423	-0.0624759	778	0	2	0	163.886	0	0.496991	0
423	chr1	211000000	211500000	424	-0.0498482	10	957	9	6	2.1065	218.824	2.23646	1.87159
424	chr1	211500000	212000000	425	0.400967	2	9	9	0	0.421301	2.05791	2.23646	0
425	chr1	212000000	212500000	426	0.464677	482	0	664	1	101.534	0	165.001	0.311931
426	chr1	212500000	213000000	427	0.580539	2	22	54	332	0.421301	5.03044	13.4188	103.561
427	chr1	213000000	213500000	428	0.200474	45	38	24	37	9.47927	8.68895	5.96389	11.5415
428	chr1	213500000	214000000	429	-0.148059	32	27	53	16	6.74081	6.17372	13.1703	4.9909
429	chr1	214000000	214500000	430	-0.178136	496	2	2	723	104.483	0.457313	0.496991	225.526
430	chr1	214500000	215000000	431	-0.537443	12	1	4	1	2.52781	0.228656	0.993982	0.311931
431	chr1	215000000	215500000	432	-1.02358	27	3	12	4	5.68756	0.685969	2.98195	1.24772
432	chr1	215500000	216000000	433	-0.86489	5	9	8	6	1.05325	2.05791	1.98796	1.87159
433	chr1	216000000	216500000	434	-1.00801	5	4	23	5	1.05325	0.914626	5.7154	1.55966
434	chr1	216500000	217000000	435	-0.977233	871	1	1	0	183.477	0.228656	0.248495	0
435	chr1	217000000	217500000	436	-0.958888	7	5	9	7	1.47455	1.14328	2.23646	2.18352
436	chr1	217500000	218000000	437	-0.834461	19	2862	373	7	4.00236	654.415	92.6888	2.18352
437	chr1	218000000	218500000	438	-0.846878	11	1	11	14	2.31715	0.228656	2.73345	4.36704
438	chr1	218500000	219000000	439	-0.682677	1	1	77	4	0.21065	0.228656	19.1342	1.24772
439	chr1	219000000	219500000	440	-0.924733	6	1183	11	17	1.2639	270.501	2.73345	5.30283
440	chr1	219500000	220000000	441	-0.881481	23	846	14	6	4.84496	193.443	3.47894	1.87159
441	chr1	220000000	220500000	442	-0.260435	6	1	2	1	1.2639	0.228656	0.496991	0.311931
442	chr1	220500000	221000000	443	-0.730115	9	0	117	26	1.89585	0	29.074	8.11021
443	chr1	221000000	221500000	444	-0.776542	7	1	200	7	1.47455	0.228656	49.6991	2.18352
444	chr1	221500000	222000000	445	-0.314596	602	17	9	29	126.812	3.88716	2.23646	9.046
445	chr1	222000000	222500000	446	-0.422805	171	1	4	0	36.0212	0.228656	0.993982	0
446	chr1	222500000	223000000	447	0.0473129	1	0	119	5	0.21065	0	29.571	1.55966
447	chr1	223000000	223500000	448	0.398112	35	17	7	10	7.37277	3.88716	1.73947	3.11931
448	chr1	223500000	224000000	449	0.420227	15	5	267	2	3.15976	1.14328	66.3483	0.623862
449	chr1	224000000	224500000	450	0.598227	420	0	51	1	88.4732	0	12.6733	0.311931
450	chr1	224500000	225000000	451	0.355404	11	5	31	260	2.31715	1.14328	7.70336	81.1021
451	chr1	225000000	225500000	452	0.0827213	2	1	12	2	0.421301	0.228656	2.98195	0.623862
452	chr1	225500000	226000000	453	0.706098	141	8	19	1	29.7017	1.82925	4.72141	0.311931
453	chr1	226000000	226500000	454	0.958124	86	26	9	2	18.1159	5.94507	2.23646	0.623862
454	chr1	226500000	227000000	455	0.937108	229	0	0	1	48.239	0	0	0.311931
455	chr1	227000000	227500000	456	0.805577	284	0	215	10	59.8247	0	53.4265	3.11931
456	chr1	227500000	228000000	457	0.725152	1057	13	929	52	222.658	2.97253	230.852	16.2204
457	chr1	228000000	228500000	458	1.0175	304	8	253	4	64.0377	1.82925	62.8694	1.24772
458	chr1	228500000	229000000	459	1.0221	642	816	108	6	135.238	186.584	26.8375	1.87159
459	chr1	229000000	229500000	460	1.04671	16	19	253	32	3.37041	4.34447	62.8694	9.9818
460	chr1	229500000	230000000	461	0.931679	37	2773	337	463	7.79407	634.064	83.743	144.424
461	chr1	230000000	230500000	462	0.952183	572	198	539	10	120.492	45.274	133.939	3.11931
462	chr1	230500000	231000000	463	0.762377	2	1566	4	1270	0.421301	358.076	0.993982	396.153
463	chr1	231000000	231500000	464	0.86446	4	2	117	0	0.842602	0.457313	29.074	0
464	chr1	231500000	232000000	465	0.714665	139	4	147	4	29.2804	0.914626	36.5288	1.24772
465	chr1	232000000	232500000	466	0.627504	269	12	257	1	56.665	2.74388	63.8633	0.311931
466	chr1	232500000	233000000	467	0.786825	0	1	0	245	0	0.228656	0	76.4231
467	chr1	233000000	233500000	468	0.669726	62	1685	27	12	13.0603	385.286	6.70938	3.74317
468	chr1	233500000	234000000	469	0.463092	514	0	4	2	108.274	0	0.993982	0.623862
469	chr1	234000000	234500000	470	0.470932	1836	0	0	1	386.754	0	0	0.311931
470	chr1	234500000	235000000	471	1.01982	9	12	688	327	1.89585	2.74388	170.965	102.001
471	chr1	235000000	235500000	472	0.829788	1	742	47	2418	0.21065	169.663	11.6793	754.249
472	chr1	235500000	236000000	473	0.553208	27	6	437	0	5.68756	1.37194	108.593	0
473	chr1	236000000	236500000	474	0.124661	1	5	28	10	0.21065	1.14328	6.95787	3.11931
474	chr1	236500000	237000000	475	-0.198975	1	0	0	0	0.21065	0	0	0
475	chr1	237000000	237500000	476	-0.753263	49	14	43	86	10.3219	3.20119	10.6853	26.8261
476	chr1	237500000	238000000	477	-0.968846	7	23	32	6	1.47455	5.2591	7.95186	1.87159
477	chr1	238000000	238500000	478	-1.06083	1	2	33	4	0.21065	0.457313	8.20035	1.24772
478	chr1	238500000	239000000	479	-1.17149	3	3	6	3	0.631951	0.685969	1.49097	0.935793
479	chr1	239000000	239500000	480	-1.12333	8	4	5	3	1.6852	0.914626	1.24248	0.935793
480	chr1	239500000	240000000	481	-0.941066	6	8	53	892	1.2639	1.82925	13.1703	278.243
481	chr1	240000000	240500000	482	-0.935906	794	7	3	0	167.256	1.6006	0.745486	0
482	chr1	240500000	241000000	483	-0.996262	173	1	2	15	36.4425	0.228656	0.496991	4.67897
483	chr1	241000000	241500000	484	-1.01563	27	16	17	13	5.68756	3.6585	4.22442	4.0551
484	chr1	241500000	242000000	485	-0.568471	29	162	409	39	6.10886	37.0423	101.635	12.1653
485	chr1	242000000	242500000	486	-0.708776	15	1	16	5	3.15976	0.228656	3.97593	1.55966
486	chr1	242500000	243000000	487	-0.951346	813	9	5	1192	171.259	2.05791	1.24248	371.822
487	chr1	243000000	243500000	488	-0.404838	14	54	144	117	2.94911	12.3474	35.7833	36.4959
488	chr1	243500000	244000000	489	-0.0604112	5	0	7	1	1.05325	0	1.73947	0.311931
489	chr1	244000000	244500000	490	-0.221746	186	0	11	0	39.181	0	2.73345	0
490	chr1	244500000	245000000	491	0.0699165	80	3	72	82	16.852	0.685969	17.8917	25.5784
491	chr1	245000000	245500000	492	0.191209	458	3	41	1	96.4779	0.685969	10.1883	0.311931
492	chr1	245500000	246000000	493	-0.199966	14	9	28	25	2.94911	2.05791	6.95787	7.79828
493	chr1	246000000	246500000	494	-0.183264	455	2	6	1	95.846	0.457313	1.49097	0.311931
494	chr1	246500000	247000000	495	0.280739	51	2	5	6	10.7432	0.457313	1.24248	1.87159
495	chr1	247000000	247500000	496	-0.0490705	0	0	0	1	0	0	0	0.311931
496	chr1	247500000	248000000	497	-1.25401	6	1	10	1	1.2639	0.228656	2.48495	0.311931
497	chr1	248000000	248500000	498	-1.46878	4	3	89	3	0.842602	0.685969	22.1161	0.935793
500	chr10	0	500000	501	0.135412	162	4	41	934	34.1254	0.914626	10.1883	291.344
501	chr10	500000	1000000	502	0.27857	293	1314	87	5	61.7206	300.455	21.6191	1.55966
502	chr10	1000000	1500000	503	0.365268	9	5	218	1088	1.89585	1.14328	54.172	339.381
503	chr10	1500000	2000000	504	-0.312519	187	4	90	5	39.3916	0.914626	22.3646	1.55966
504	chr10	2000000	2500000	505	-0.440021	592	1058	85	2	124.705	241.919	21.1221	0.623862
505	chr10	2500000	3000000	506	0.191994	51	296	1	1	10.7432	67.6823	0.248495	0.311931
506	chr10	3000000	3500000	507	0.0240273	13	70	145	9	2.73846	16.006	36.0318	2.80738
507	chr10	3500000	4000000	508	-0.291265	7	71	144	3	1.47455	16.2346	35.7833	0.935793
508	chr10	4000000	4500000	509	-0.73081	15	3	24	4	3.15976	0.685969	5.96389	1.24772
509	chr10	4500000	5000000	510	-0.4759	29	41	76	519	6.10886	9.37491	18.8857	161.892
510	chr10	5000000	5500000	511	-0.124125	544	11	784	7	114.594	2.51522	194.82	2.18352
511	chr10	5500000	6000000	512	0.53418	179	1	59	1	37.7064	0.228656	14.6612	0.311931
512	chr10	6000000	6500000	513	0.68006	672	502	4	5	141.557	114.786	0.993982	1.55966
513	chr10	6500000	7000000	514	0.575576	6	2446	85	3	1.2639	559.294	21.1221	0.935793
514	chr10	7000000	7500000	515	0.460954	137	7	32	1	28.8591	1.6006	7.95186	0.311931
515	chr10	7500000	8000000	516	0.298476	3	2	28	4	0.631951	0.457313	6.95787	1.24772
516	chr10	8000000	8500000	517	0.568326	570	0	0	0	120.071	0	0	0
517	chr10	8500000	9000000	518	-0.188411	2	6	7	5	0.421301	1.37194	1.73947	1.55966
518	chr10	9000000	9500000	519	-0.268003	63	575	6	8	13.271	131.477	1.49097	2.49545
519	chr10	9500000	10000000	520	-0.755849	9	8	25	7	1.89585	1.82925	6.21239	2.18352
520	chr10	10000000	10500000	521	-0.78653	6	0	61	3	1.2639	0	15.1582	0.935793
521	chr10	10500000	11000000	522	-0.458581	7	5	267	4	1.47455	1.14328	66.3483	1.24772
522	chr10	11000000	11500000	523	0.225453	462	3	9	11	97.3205	0.685969	2.23646	3.43124
523	chr10	11500000	12000000	524	0.603612	1080	2	28	1	227.502	0.457313	6.95787	0.311931
524	chr10	12000000	12500000	525	0.813712	24	363	408	1094	5.05561	83.0023	101.386	341.253
525	chr10	12500000	13000000	526	0.678135	567	1	402	0	119.439	0.228656	99.8952	0
526	chr10	13000000	13500000	527	0.59526	144	2	528	64	30.3337	0.457313	131.206	19.9636
527	chr10	13500000	14000000	528	0.434317	5	6	3	4	1.05325	1.37194	0.745486	1.24772
528	chr10	14000000	14500000	529	-0.0408293	475	1	234	26	100.059	0.228656	58.1479	8.11021
529	chr10	14500000	15000000	530	0.402925	1318	1	170	14	277.637	0.228656	42.2442	4.36704
530	chr10	15000000	15500000	531	0.260853	3	37	48	4	0.631951	8.46029	11.9278	1.24772
531	chr10	15500000	16000000	532	-0.353665	486	2	11	5	102.376	0.457313	2.73345	1.55966
532	chr10	16000000	16500000	533	-0.551458	459	3	2	6	96.6886	0.685969	0.496991	1.87159
533	chr10	16500000	17000000	534	0.0588171	107	3	720	0	22.5396	0.685969	178.917	0
534	chr10	17000000	17500000	535	0.443899	441	1	330	1	92.8968	0.228656	82.0035	0.311931
535	chr10	17500000	18000000	536	0.580598	4	4	6	29	0.842602	0.914626	1.49097	9.046
536	chr10	18000000	18500000	537	-0.251062	548	7	213	3	115.436	1.6006	52.9295	0.935793
537	chr10	18500000	19000000	538	-0.232645	47	5	27	613	9.90057	1.14328	6.70938	191.214
538	chr10	19000000	19500000	539	-0.835338	59	18	20	5	12.4284	4.11582	4.96991	1.55966
539	chr10	19500000	20000000	540	-0.956903	5	2	2	1	1.05325	0.457313	0.496991	0.311931
540	chr10	20000000	20500000	541	-0.896532	6	4	167	24	1.2639	0.914626	41.4987	7.48635
541	chr10	20500000	21000000	542	-0.908251	3	0	221	3	0.631951	0	54.9175	0.935793
542	chr10	21000000	21500000	543	-0.564998	4	1	81	1	0.842602	0.228656	20.1281	0.311931
543	chr10	21500000	22000000	544	0.231861	2	1996	1	0	0.421301	456.398	0.248495	0
544	chr10	22000000	22500000	545	0.0774817	33	29	57	18	6.95146	6.63104	14.1642	5.61476
545	chr10	22500000	23000000	546	0.192878	472	6	14	3	99.427	1.37194	3.47894	0.935793
546	chr10	23000000	23500000	547	-0.015222	5	2	15	4	1.05325	0.457313	3.72743	1.24772
547	chr10	23500000	24000000	548	-0.462988	313	16	13	51	65.9336	3.6585	3.23044	15.9085
548	chr10	24000000	24500000	549	-0.795707	14	520	348	6	2.94911	118.901	86.4764	1.87159
549	chr10	24500000	25000000	550	-0.268769	190	0	874	0	40.0236	0	217.185	0
550	chr10	25000000	25500000	551	-0.0692834	510	30	63	0	107.432	6.85969	15.6552	0
551	chr10	25500000	26000000	552	-0.804532	2	9	10	7	0.421301	2.05791	2.48495	2.18352
552	chr10	26000000	26500000	553	-0.582363	5	2	152	5	1.05325	0.457313	37.7713	1.55966
553	chr10	26500000	27000000	554	0.277103	40	45	287	73	8.42602	10.2895	71.3182	22.771
554	chr10	27000000	27500000	555	0.512419	42	1908	3	3066	8.84732	436.277	0.745486	956.381
555	chr10	27500000	28000000	556	-0.00498323	1053	12	172	16	221.815	2.74388	42.7412	4.9909
556	chr10	28000000	28500000	557	-0.536666	272	5	14	0	57.2969	1.14328	3.47894	0
557	chr10	28500000	29000000	558	0.0171186	16	53	6	2	3.37041	12.1188	1.49097	0.623862
558	chr10	29000000	29500000	559	-0.373875	0	3068	7	0	0	701.518	1.73947	0
559	chr10	29500000	30000000	560	0.208532	4	14	231	5	0.842602	3.20119	57.4025	1.55966
560	chr10	30000000	30500000	561	0.165902	712	2	255	1	149.983	0.457313	63.3663	0.311931
561	chr10	30500000	31000000	562	0.510166	1	1306	438	3	0.21065	298.625	108.841	0.935793
562	chr10	31000000	31500000	563	0.593338	87	0	16	0	18.3266	0	3.97593	0
563	chr10	31500000	32000000	564	0.419862	34	18	90	3	7.16212	4.11582	22.3646	0.935793
564	chr10	32000000	32500000	565	0.605704	0	1	257	9	0	0.228656	63.8633	2.80738
565	chr10	32500000	33000000	566	0.667681	22	9	99	6	4.63431	2.05791	24.6011	1.87159
566	chr10	33000000	33500000	567	0.560481	67	12	673	714	14.1136	2.74388	167.237	222.719
567	chr10	33500000	34000000	568	-0.0931423	4	1178	260	0	0.842602	269.357	64.6088	0
568	chr10	34000000	34500000	569	0.0247877	9	68	226	9	1.89585	15.5486	56.16	2.80738
569	chr10	34500000	35000000	570	0.347563	10	4193	2	0	2.1065	958.757	0.496991	0
570	chr10	35000000	35500000	571	0.506875	3	0	22	0	0.631951	0	5.4669	0
571	chr10	35500000	36000000	572	0.0940781	133	31	367	56	28.0165	7.08835	91.1978	17.4681
572	chr10	36000000	36500000	573	-0.780698	104	18	5	9	21.9076	4.11582	1.24248	2.80738
573	chr10	36500000	37000000	574	-0.983204	144	1	4	1	30.3337	0.228656	0.993982	0.311931
574	chr10	37000000	37500000	575	-0.761715	93	0	0	4	19.5905	0	0	1.24772
575	chr10	37500000	38000000	576	-0.638953	6	7	31	581	1.2639	1.6006	7.70336	181.232
576	chr10	38000000	38500000	577	0.0210828	5	3	30	5	1.05325	0.685969	7.45486	1.55966
584	chr10	42000000	42500000	585	0.240486	9	6	36	3	1.89585	1.37194	8.94584	0.935793
586	chr10	43000000	43500000	587	-0.289587	712	0	262	1	149.983	0	65.1058	0.311931
587	chr10	43500000	44000000	588	0.143427	0	0	414	33	0	0	102.877	10.2937
588	chr10	44000000	44500000	589	-0.16818	126	32	16	5	26.542	7.31701	3.97593	1.55966
589	chr10	44500000	45000000	590	-0.439643	15	5	137	46	3.15976	1.14328	34.0439	14.3488
590	chr10	45000000	45500000	591	0.357277	614	6	7	4	129.339	1.37194	1.73947	1.24772
591	chr10	45500000	46000000	592	0.258185	1002	13	110	83	211.072	2.97253	27.3345	25.8903
594	chr10	47000000	47500000	595	0.193928	104	1	0	175	21.9076	0.228656	0	54.5879
599	chr10	49500000	50000000	600	0.00159069	1	1468	5	578	0.21065	335.668	1.24248	180.296
600	chr10	50000000	50500000	601	-0.123008	31	3	50	0	6.53016	0.685969	12.4248	0
601	chr10	50500000	51000000	602	0.390467	8	12	8	1	1.6852	2.74388	1.98796	0.311931
604	chr10	52000000	52500000	605	-0.0482422	18	14	905	9	3.79171	3.20119	224.888	2.80738
605	chr10	52500000	53000000	606	-1.12622	4	18	15	3	0.842602	4.11582	3.72743	0.935793
606	chr10	53000000	53500000	607	-1.14724	16	7	16	6	3.37041	1.6006	3.97593	1.87159
607	chr10	53500000	54000000	608	-1.13672	9	7	8	5	1.89585	1.6006	1.98796	1.55966
608	chr10	54000000	54500000	609	-1.07954	2	0	3	3	0.421301	0	0.745486	0.935793
609	chr10	54500000	55000000	610	-0.965823	383	2	77	4	80.6791	0.457313	19.1342	1.24772
610	chr10	55000000	55500000	611	-1.0784	11	3	13	484	2.31715	0.685969	3.23044	150.975
611	chr10	55500000	56000000	612	-1.01999	9	4	14	1215	1.89585	0.914626	3.47894	378.996
612	chr10	56000000	56500000	613	-1.04549	10	4	9	3	2.1065	0.914626	2.23646	0.935793
613	chr10	56500000	57000000	614	-0.974066	261	2601	1	0	54.9798	594.735	0.248495	0
614	chr10	57000000	57500000	615	-0.95243	4	0	7	0	0.842602	0	1.73947	0
615	chr10	57500000	58000000	616	-0.982532	85	5	4	2	17.9053	1.14328	0.993982	0.623862
616	chr10	58000000	58500000	617	-0.941401	0	2	1	3	0	0.457313	0.248495	0.935793
617	chr10	58500000	59000000	618	-1.07809	1	3	3	0	0.21065	0.685969	0.745486	0
618	chr10	59000000	59500000	619	-1.04157	8	10	23	110	1.6852	2.28656	5.7154	34.3124
619	chr10	59500000	60000000	620	-0.871632	13	2	4	2	2.73846	0.457313	0.993982	0.623862
620	chr10	60000000	60500000	621	-0.541091	9	6	598	3	1.89585	1.37194	148.6	0.935793
621	chr10	60500000	61000000	622	-0.975738	134	2	24	4	28.2272	0.457313	5.96389	1.24772
622	chr10	61000000	61500000	623	-0.833655	6	5	350	4	1.2639	1.14328	86.9734	1.24772
623	chr10	61500000	62000000	624	-0.522769	91	8	12	17	19.1692	1.82925	2.98195	5.30283
624	chr10	62000000	62500000	625	-0.924562	21	21	116	13	4.42366	4.80179	28.8255	4.0551
625	chr10	62500000	63000000	626	-0.386988	722	1	11	549	152.09	0.228656	2.73345	171.25
626	chr10	63000000	63500000	627	-0.0830787	57	24	6	0	12.0071	5.48776	1.49097	0
627	chr10	63500000	64000000	628	0.301494	4	1	471	2	0.842602	0.228656	117.041	0.623862
628	chr10	64000000	64500000	629	-0.292679	15	12	314	6	3.15976	2.74388	78.0276	1.87159
629	chr10	64500000	65000000	630	-0.274884	189	9	249	7	39.8129	2.05791	61.8754	2.18352
630	chr10	65000000	65500000	631	0.246247	388	863	94	161	81.7324	197.331	23.3586	50.2209
631	chr10	65500000	66000000	632	-0.746693	12	378	10	85	2.52781	86.4321	2.48495	26.5141
632	chr10	66000000	66500000	633	-1.0757	16	0	479	2	3.37041	0	119.029	0.623862
633	chr10	66500000	67000000	634	-1.08475	4	4	27	6	0.842602	0.914626	6.70938	1.87159
634	chr10	67000000	67500000	635	-1.14482	1	0	810	1	0.21065	0	201.281	0.311931
635	chr10	67500000	68000000	636	-1.04918	28	3	2	1	5.89821	0.685969	0.496991	0.311931
636	chr10	68000000	68500000	637	-1.11674	17	20	11	3	3.58106	4.57313	2.73345	0.935793
637	chr10	68500000	69000000	638	-1.09073	13	5	15	2	2.73846	1.14328	3.72743	0.623862
638	chr10	69000000	69500000	639	-0.818973	47	20	16	7	9.90057	4.57313	3.97593	2.18352
639	chr10	69500000	70000000	640	0.241074	3	4	800	1	0.631951	0.914626	198.796	0.311931
640	chr10	70000000	70500000	641	0.620706	17	5	318	0	3.58106	1.14328	79.0216	0
641	chr10	70500000	71000000	642	0.705138	535	0	2	986	112.698	0	0.496991	307.564
642	chr10	71000000	71500000	643	0.6365	44	5	6	149	9.26862	1.14328	1.49097	46.4777
643	chr10	71500000	72000000	644	0.619678	812	7	262	3	171.048	1.6006	65.1058	0.935793
644	chr10	72000000	72500000	645	0.593623	174	3	5	15	36.6532	0.685969	1.24248	4.67897
645	chr10	72500000	73000000	646	0.407783	43	3	1764	2	9.05797	0.685969	438.346	0.623862
646	chr10	73000000	73500000	647	0.526637	303	474	3	0	63.8271	108.383	0.745486	0
647	chr10	73500000	74000000	648	0.667952	373	12	272	2663	78.5726	2.74388	67.5908	830.673
648	chr10	74000000	74500000	649	0.635922	1324	8	22	6	278.901	1.82925	5.4669	1.87159
649	chr10	74500000	75000000	650	0.601206	1034	19	276	4847	217.813	4.34447	68.5848	1511.93
650	chr10	75000000	75500000	651	0.667944	365	2	340	2	76.8874	0.457313	84.4885	0.623862
651	chr10	75500000	76000000	652	0.664438	360	320	259	3	75.8342	73.1701	64.3603	0.935793
652	chr10	76000000	76500000	653	0.536548	1	26	8	3	0.21065	5.94507	1.98796	0.935793
653	chr10	76500000	77000000	654	0.583882	153	6	16	9	32.2295	1.37194	3.97593	2.80738
654	chr10	77000000	77500000	655	-0.185819	400	5	295	1575	84.2602	1.14328	73.3062	491.292
655	chr10	77500000	78000000	656	-0.595079	10	3	53	9	2.1065	0.685969	13.1703	2.80738
656	chr10	78000000	78500000	657	-0.787136	23	11	13	3	4.84496	2.51522	3.23044	0.935793
657	chr10	78500000	79000000	658	-0.34676	0	2	681	3	0	0.457313	169.225	0.935793
658	chr10	79000000	79500000	659	0.0271735	58	10	74	115	12.2177	2.28656	18.3887	35.8721
659	chr10	79500000	80000000	660	0.492306	41	9	38	268	8.63667	2.05791	9.44283	83.5975
660	chr10	80000000	80500000	661	0.285074	1095	2498	54	3	230.662	571.184	13.4188	0.935793
661	chr10	80500000	81000000	662	0.555195	0	1	18	6	0	0.228656	4.47292	1.87159
662	chr10	81000000	81500000	663	0.311882	685	1	445	7	144.296	0.228656	110.58	2.18352
663	chr10	81500000	82000000	664	0.150173	2	1	314	357	0.421301	0.228656	78.0276	111.359
664	chr10	82000000	82500000	665	-0.226361	11	38	7	146	2.31715	8.68895	1.73947	45.5419
665	chr10	82500000	83000000	666	-1.03371	1	6	2	0	0.21065	1.37194	0.496991	0
666	chr10	83000000	83500000	667	-1.27498	14	12	12	3	2.94911	2.74388	2.98195	0.935793
667	chr10	83500000	84000000	668	-1.19637	0	161	8	5	0	36.8137	1.98796	1.55966
668	chr10	84000000	84500000	669	-1.19795	5	8	11	7	1.05325	1.82925	2.73345	2.18352
669	chr10	84500000	85000000	670	-1.1624	3	4	11	4	0.631951	0.914626	2.73345	1.24772
670	chr10	85000000	85500000	671	-1.2208	646	2	5	39	136.08	0.457313	1.24248	12.1653
671	chr10	85500000	86000000	672	-0.687732	19	10	6	228	4.00236	2.28656	1.49097	71.1203
672	chr10	86000000	86500000	673	-0.197305	4	4	23	3	0.842602	0.914626	5.7154	0.935793
673	chr10	86500000	87000000	674	-0.901872	12	15	65	12	2.52781	3.42985	16.1522	3.74317
674	chr10	87000000	87500000	675	-0.785612	5	1	3	526	1.05325	0.228656	0.745486	164.076
675	chr10	87500000	88000000	676	-0.0910279	2	5	7	582	0.421301	1.14328	1.73947	181.544
676	chr10	88000000	88500000	677	0.337461	380	6	7	4	80.0472	1.37194	1.73947	1.24772
677	chr10	88500000	89000000	678	0.537159	5	5	7	1	1.05325	1.14328	1.73947	0.311931
678	chr10	89000000	89500000	679	0.567631	497	117	54	2392	104.693	26.7528	13.4188	746.139
679	chr10	89500000	90000000	680	0.740734	316	3	137	1	66.5655	0.685969	34.0439	0.311931
680	chr10	90000000	90500000	681	0.634266	889	2	6	3139	187.268	0.457313	1.49097	979.152
681	chr10	90500000	91000000	682	0.585058	0	1745	233	0	0	399.006	57.8994	0
682	chr10	91000000	91500000	683	0.378127	28	66	231	12	5.89821	15.0913	57.4025	3.74317
683	chr10	91500000	92000000	684	-0.444597	9	101	233	759	1.89585	23.0943	57.8994	236.756
684	chr10	92000000	92500000	685	-0.601786	5	1	680	8	1.05325	0.228656	168.977	2.49545
685	chr10	92500000	93000000	686	0.348101	4	68	68	2	0.842602	15.5486	16.8977	0.623862
686	chr10	93000000	93500000	687	0.28935	14	14	541	48	2.94911	3.20119	134.436	14.9727
687	chr10	93500000	94000000	688	0.519237	4	490	557	2	0.842602	112.042	138.412	0.623862
688	chr10	94000000	94500000	689	0.568438	76	0	151	1	16.0094	0	37.5228	0.311931
689	chr10	94500000	95000000	690	0.405483	3	19	42	11	0.631951	4.34447	10.4368	3.43124
690	chr10	95000000	95500000	691	0.300701	426	18	555	1	89.7371	4.11582	137.915	0.311931
691	chr10	95500000	96000000	692	0.0781121	538	1202	234	7	113.33	274.845	58.1479	2.18352
692	chr10	96000000	96500000	693	0.248492	96	1	39	0	20.2224	0.228656	9.69132	0
693	chr10	96500000	97000000	694	0.194656	7	388	18	19	1.47455	88.7187	4.47292	5.92669
694	chr10	97000000	97500000	695	0.343215	397	1339	1	1	83.6282	306.171	0.248495	0.311931
695	chr10	97500000	98000000	696	0.456403	870	123	190	5	183.266	28.1247	47.2141	1.55966
696	chr10	98000000	98500000	697	0.553744	1088	2	307	2	229.188	0.457313	76.2881	0.623862
697	chr10	98500000	99000000	698	0.603613	58	1	545	36	12.2177	0.228656	135.43	11.2295
698	chr10	99000000	99500000	699	0.637574	612	6	688	1	128.918	1.37194	170.965	0.311931
699	chr10	99500000	100000000	700	0.439676	290	202	384	0	61.0886	46.1886	95.4223	0
700	chr10	100000000	100500000	701	0.13247	944	7	93	5	198.854	1.6006	23.1101	1.55966
701	chr10	100500000	101000000	702	-0.346893	51	12	70	3	10.7432	2.74388	17.3947	0.935793
702	chr10	101000000	101500000	703	0.270972	57	268	78	1141	12.0071	61.2799	19.3826	355.913
703	chr10	101500000	102000000	704	0.568748	74	2	885	9	15.5881	0.457313	219.919	2.80738
704	chr10	102000000	102500000	705	0.636036	303	26	141	11	63.8271	5.94507	35.0379	3.43124
705	chr10	102500000	103000000	706	0.61328	74	5	312	0	15.5881	1.14328	77.5306	0
706	chr10	103000000	103500000	707	0.606345	132	11	914	9	27.8059	2.51522	227.125	2.80738
707	chr10	103500000	104000000	708	0.689086	29	84	156	34	6.10886	19.2071	38.7653	10.6057
708	chr10	104000000	104500000	709	0.712303	1257	1	268	4	264.788	0.228656	66.5968	1.24772
709	chr10	104500000	105000000	710	0.720127	913	511	387	43	192.324	116.843	96.1678	13.413
710	chr10	105000000	105500000	711	0.701614	313	1	67	23	65.9336	0.228656	16.6492	7.17442
711	chr10	105500000	106000000	712	0.566477	1792	0	211	2637	377.486	0	52.4325	822.562
712	chr10	106000000	106500000	713	-0.0305237	154	1156	72	2	32.4402	264.327	17.8917	0.623862
713	chr10	106500000	107000000	714	-0.998753	19	0	48	3	4.00236	0	11.9278	0.935793
714	chr10	107000000	107500000	715	-1.28981	69	3	203	4	14.5349	0.685969	50.4446	1.24772
715	chr10	107500000	108000000	716	-1.24847	8	11	13	9	1.6852	2.51522	3.23044	2.80738
716	chr10	108000000	108500000	717	-1.2232	4	13	69	10	0.842602	2.97253	17.1462	3.11931
717	chr10	108500000	109000000	718	-1.16116	1	0	663	2	0.21065	0	164.753	0.623862
[truncated: 4,883 more rows]
