# Supplementary material for: Recurrent Translocations in Topoisomerase Inhibitor-Related Leukemia Are Determined by the Features of DNA Breaks Rather Than by the Proximity of the Translocating Genes
Source: Int J Mol Sci. 2022 Aug 29;23(17):9824. doi: 10.3390/ijms23179824 (PMC9456246; doi:10.3390/ijms23179824)
Supplement: Supplementary file 1 [file ijms-23-09824-s001.zip › Table S4. Partners VS other human genes. 4C-seq.xlsx]

## Sheet: Sheet1
Translocation partner genes set	partners of:	4C library	exp.conditions	p-value (null hypothesis: 4C signal for partners differ from other genes)
RUNX1T1, MECOM, PRDM16	AML1	AML1_1	non-treated	0.847904
		AML1_2	non-treated	0.970446
		CCND1_1	non-treated	0.372306
		CCND1_2	non-treated	0.564915
		MLL_1	non-treated	0.208429
		MLL_2	non-treated	0.173517
		AML1_1	etoposide-treated	0.631648
		AML1_2	etoposide-treated	0.353053
		CCND1_1	etoposide-treated	0.12763
		CCND1_2	etoposide-treated	0.545322
		MLL_1	etoposide-treated	0.505294
		MLL_2	etoposide-treated	0.757488
MLLT3, AFF1, ELL, MLLT1, CREBBP	MLL	MLL_1	non-treated	0.506775
		MLL_2	non-treated	0.216159
		AML1_1	non-treated	0.265916
		AML1_2	non-treated	0.463707
		CCND1_1	non-treated	0.153555
		CCND1_2	non-treated	0.898273
		MLL_1	etoposide-treated	0.777583
		MLL_2	etoposide-treated	0.150303
		AML1_1	etoposide-treated	0.76588
		AML1_2	etoposide-treated	0.955061
		CCND1_1	etoposide-treated	0.68941
		CCND1_2	etoposide-treated	0.213853
