# Supplementary material for: Recurrent Translocations in Topoisomerase Inhibitor-Related Leukemia Are Determined by the Features of DNA Breaks Rather Than by the Proximity of the Translocating Genes
Source: Int J Mol Sci. 2022 Aug 29;23(17):9824. doi: 10.3390/ijms23179824 (PMC9456246; doi:10.3390/ijms23179824)
Supplement: Supplementary file 1 [file ijms-23-09824-s001.zip › Table S5. 4C_mapping_stat.xlsx]

## Sheet: Sheet1
Sample/anchor		Sample/anchor	Uniquely mapped	Total reads	Fraction of mapped	Reads attributed to an anchor, per sample		Original sample	Total read pairs		Fraction of reads attributed to an anchor	P(has anchor and mapped)
MLL_2	non-treated	./Sample_4C_K2/out/fcut_anchorMLL.fastq	4493049	4618275	0.972885							0.875659
AML1_2	non-treated	./Sample_4C_K2/out/fcut_anchorAML1.fastq	9563592	10262254	0.931919							0.838787
CCND1_2	non-treated	./Sample_4C_K2/out/fcut_anchorCcd1.fastq	4421278	4578587	0.965642	19459116	86478800	./Sample_4C_K2/out/f.fastq	21619700		0.900064	0.86914
MLL_2	etoposide-treated	./Sample_4C_O2/out/fcut_anchorMLL.fastq	3314896	3416355	0.970302							0.824696
AML1_2	etoposide-treated	./Sample_4C_O2/out/fcut_anchorAML1.fastq	8901674	9538937	0.933193							0.793156
CCND1_2	etoposide-treated	./Sample_4C_O2/out/fcut_anchorCcd1.fastq	3234889	3353856	0.964528	16309148	76754612	./Sample_4C_O2/out/f.fastq	19188653		0.849937	0.819788
MLL_1	non-treated	./Sample_4C_K1/out/fcut_anchorMLL.fastq	4216296	4333631	0.972925							0.885938
AML1_1	non-treated	./Sample_4C_K1/out/fcut_anchorAML1.fastq	10151225	10791740	0.940648							0.856547
CCND1_1	non-treated	./Sample_4C_K1/out/fcut_anchorCcd1.fastq	4789616	4942329	0.969101	20067700	88152220	./Sample_4C_K1/out/f.fastq	22038055		0.910593	0.882457
MLL_1	etoposide-treated	./Sample_4C_O1/out/fcut_anchorMLL.fastq	3746887	3857179	0.971406							0.863615
AML1_1	etoposide-treated	./Sample_4C_O1/out/fcut_anchorAML1.fastq	7027049	7588073	0.926065							0.823305
CCND1_1	etoposide-treated	./Sample_4C_O1/out/fcut_anchorCcd1.fastq	4066369	4221659	0.963216	15666911	70489424	./Sample_4C_O1/out/f.fastq	17622356		0.889036	0.856334
