# Supplementary figures and images for: Recurrent Translocations in Topoisomerase Inhibitor-Related Leukemia Are Determined by the Features of DNA Breaks Rather Than by the Proximity of the Translocating Genes
Source: MDPI journal article supplement (doi:10.3390/ijms23179824), 2022-08-29

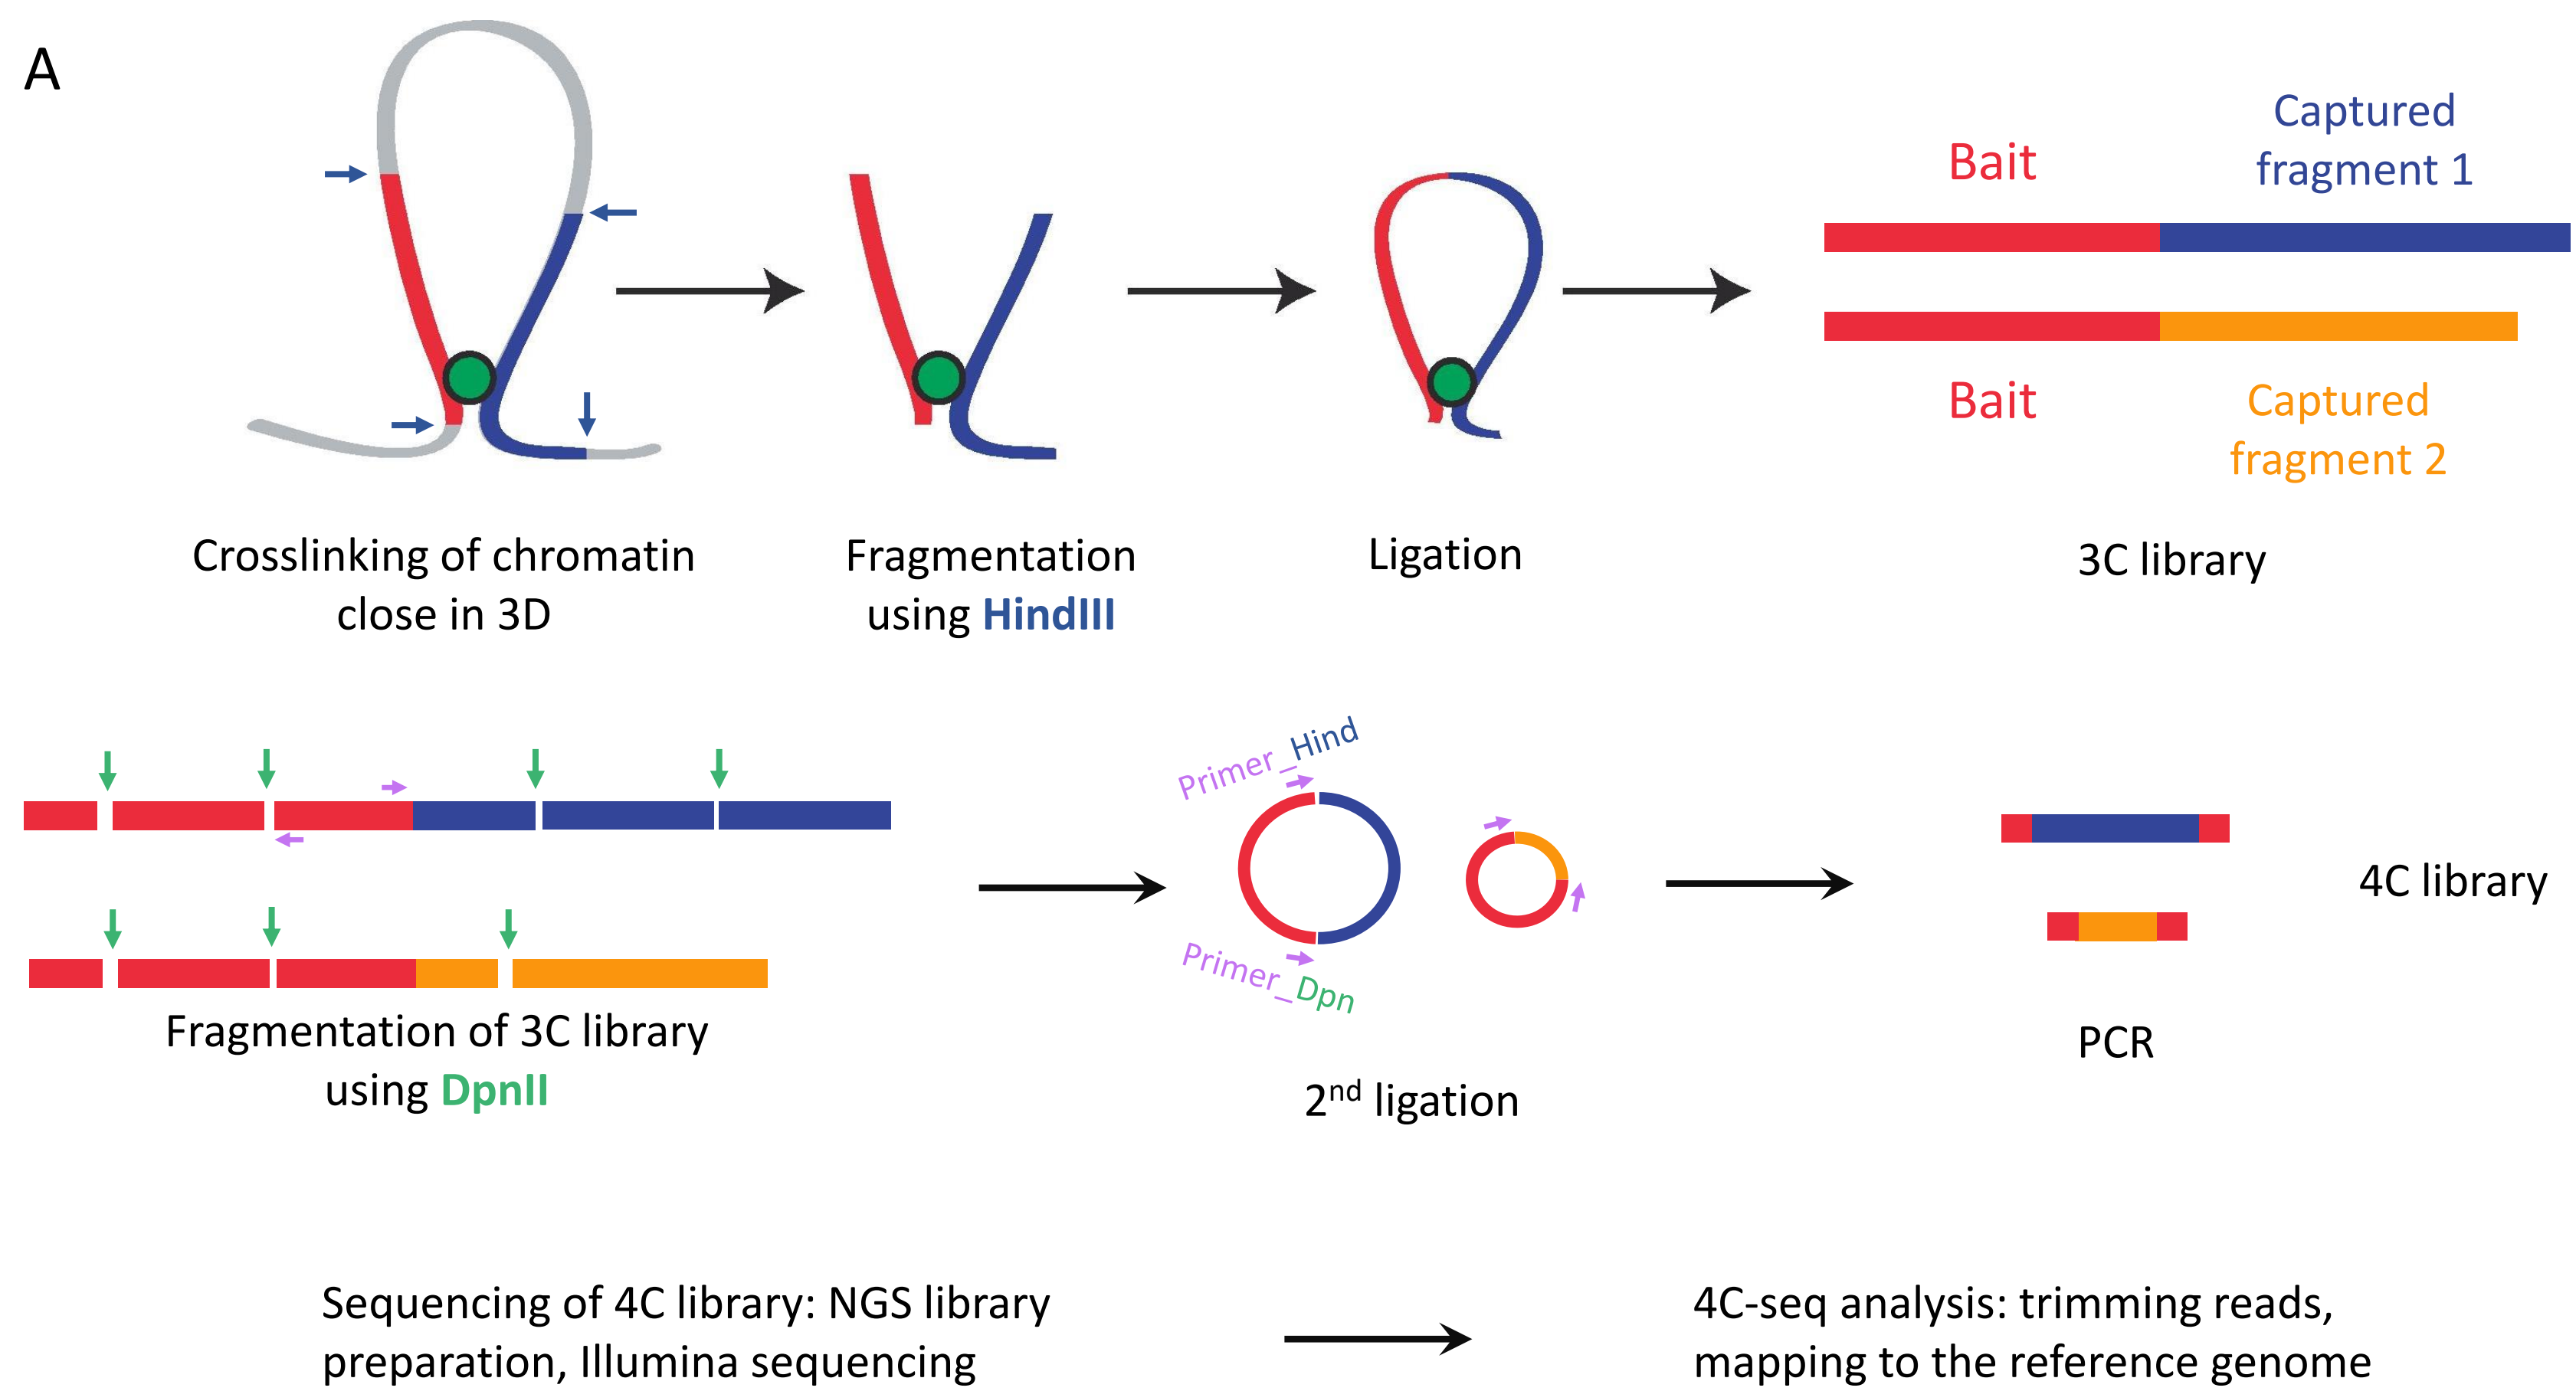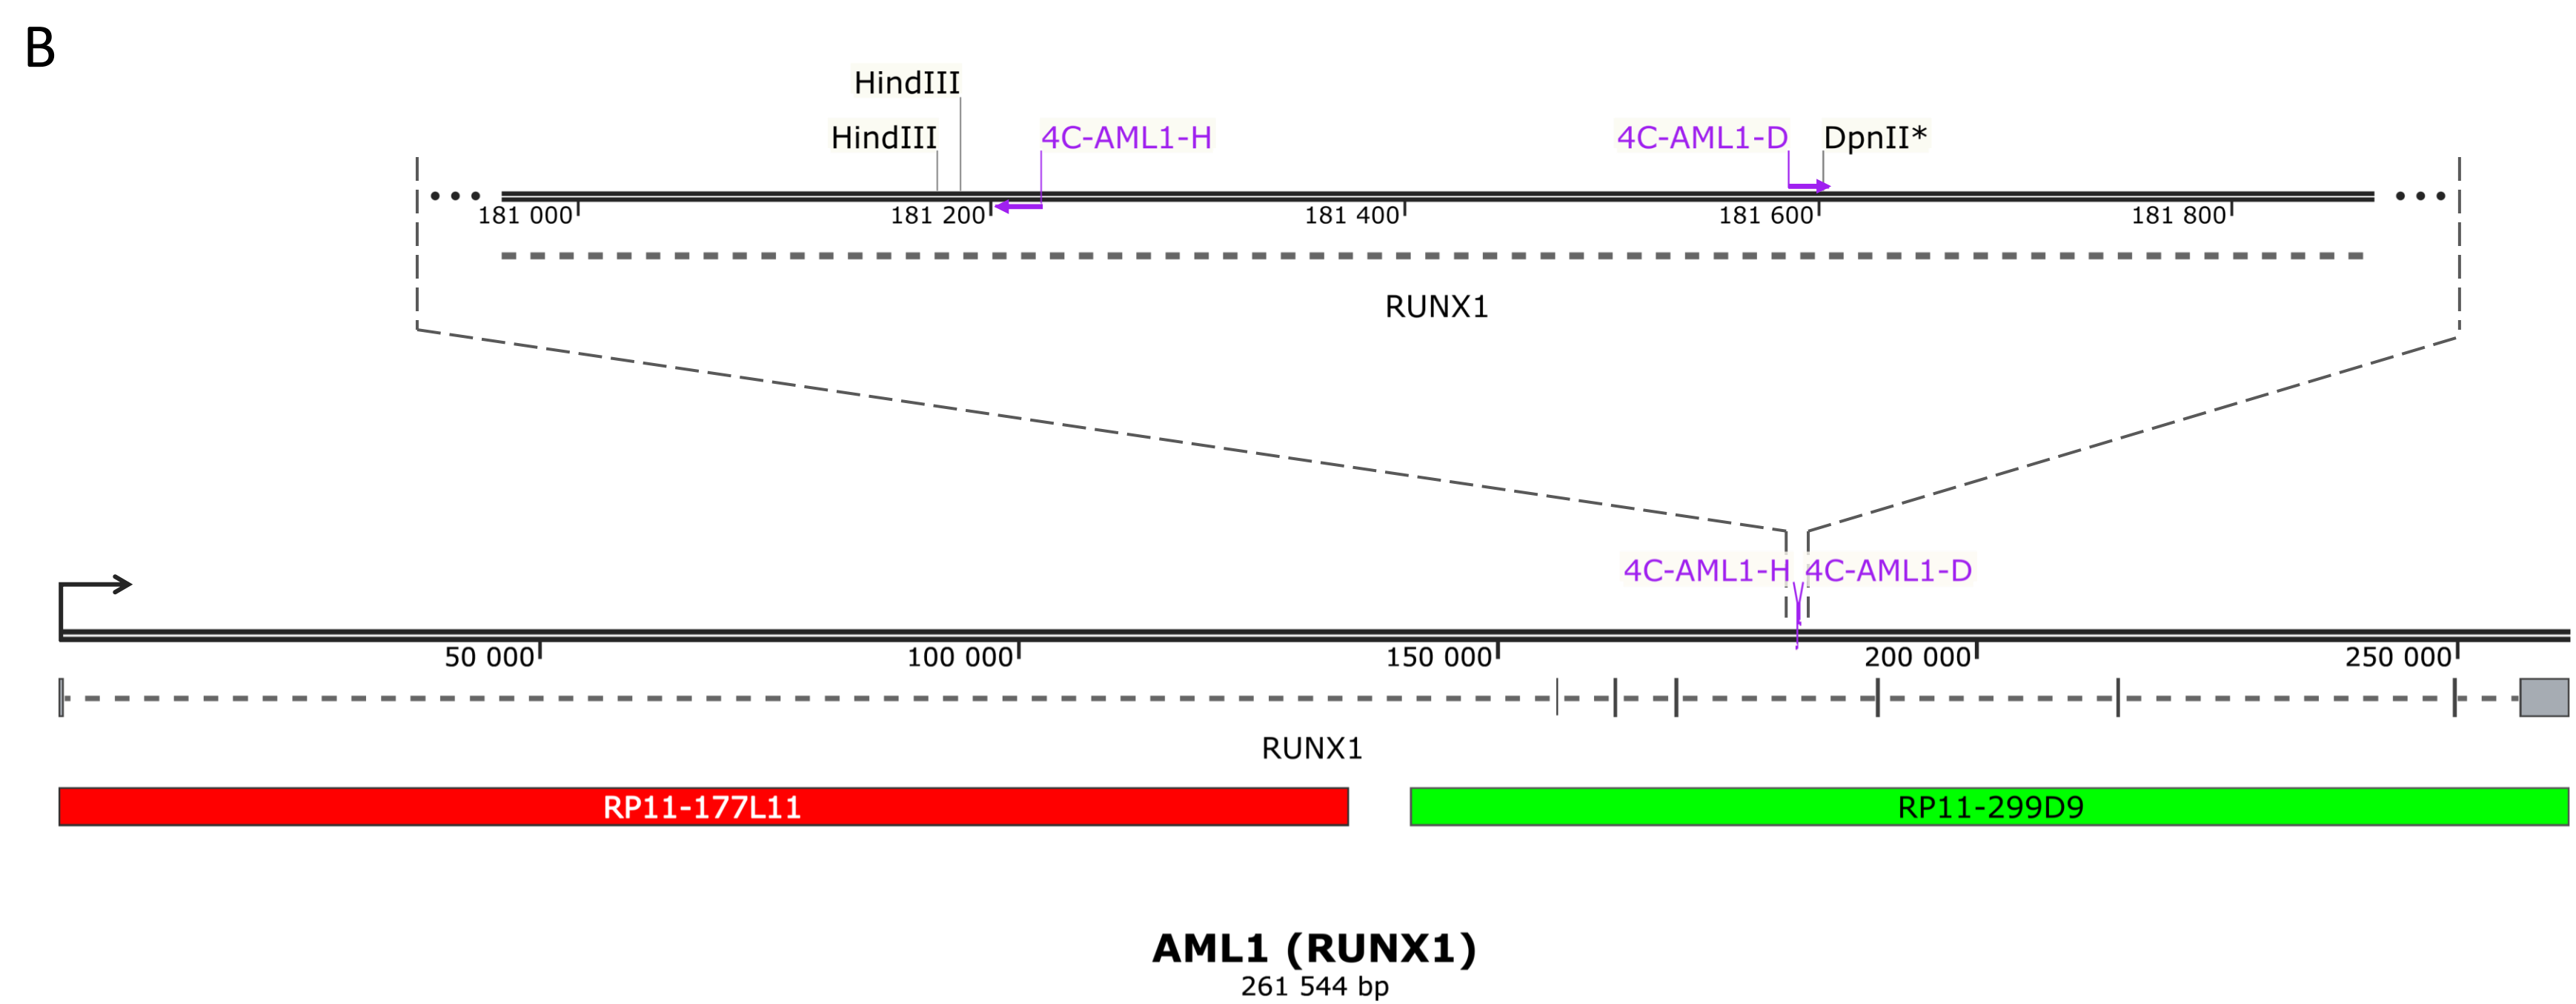

Supplement: s1 [file s1]
